# Supplementary material for: Rare variant analyses across multiethnic cohorts identify novel genes for refractive error
Source: Research Square preprint supplement (doi:10.21203/rs.3.rs-846265/v1), 2021-09-03
Supplement: Supplementary file 1 [file 17e97d947c09044293b5916e.xlsx]

## Sheet: STable1
Supplementary Table 1: Cohort Breakdown
Cohort Name	Combined Cohort	Array	Ethnicity	Nationality	Individuals	Mean SER (SD)
AREDS	IECC	Illumina HumanExome-12 v 1.1	European	American	1562	-0.88 (3.05)
Croatia-Korcula	IECC	Illumina HumanExome-12 v 1.0	European	Croatian	841
ECGUT	IECC	Illumina HumanCoreExome-12 v1.0	European	Estonian	272
ERF	IECC	Illumina HumanExome-12 v 1.1	European	Dutch	1295
FITSA	IECC	Illumina HumanCoreExome-12 v1.0	European	Finnish	269
RSI	IECC	Illumina HumanExome-12 v 1.0	European	Dutch	2617
Sardinia	IECC	Illumina HumanExome-12 v 1.1	European	Italian	3008
SINDI	IECC	Illumina HumanExome-12 v 1.0	Indian	Singaporean	308
TwinsUK	IECC	Illumina HumanExome-12 v 1.1	European	British	2925
SCES	EACC	Illumina HumanExome-12 v 1.0	Han Chinese	Singaporean	2487	-0.45 (2.28)
SiMES	EACC	Illumina HumanExome-12 v 1.0	Malay	Singaporean	2380
REHS	None (Replication)	Illumina HumanExome-12 v 1.1	European	Australian	1020	-0.031 (1.53)
BDES	None (Replication)	Illumina HumanExome-12 v 1.1	European	American	1740	0.0024 (2.87)
EPIC-Norfolk	None (Replication)	Affymetrix UK BioBank Axiom Array	European	British	6282	0.213 (2.35)

## Sheet: STable2
Supplementary Table 2: Polygenic Risk Score Calculation Values
Study	N missings SNPs (from Total 446)	X chromosome missing	Total predictors	Analysis cohort
EPIC-Norfolk	13		433	replication
Raine	15		431	replication
ECGUT	18	yes	428	IECC
FITSA	16		430	IECC
TwinsUK	0		446	IECC
Croatia	26	yes	420	IECC
SINDI	21		425	IECC
Serity	21		425	EACC
SiMES	21		425	EACC
RS1	15	no	430	IECC
ERF	41	yes	405	IECC
AREDS	183		263	IECC

## Sheet: STable3
Supplementary Table 3: Explained variance of top individual genes using EMMAX-VT with and without PRS covariates
	without PRS								with PRS
Population	PER3	PDCD6IP	MAPT	CHST6	GRHL2	P4HTM	<10-5 variants		PER3	PDCD6IP	MAPT	CHST6	GRHL2	P4HTM	<10-5 variants
IECC without Sardinia	0.0007449	0.002187	0.0007641	0.003459	0.0009693	0.0002947	0.084559		0.001126	0.0002593	0.0008581	0.003922	0.001196	0.0004225	0.0031003
EACC	0.0005002	0.002937	0.0007887	0.0001617	NA	0.008374	0.199792		0.0004512	0.002841	0.000884	0.0002055	0.0003564	0.004363	0.237922
REHS	0.007008	NA	0.03931	0.0008841	0.02774	0.0008129	2.23754		0.006308	NA	0.0377	0.001401	0.0255	0.0009464	2.05857
EPIC-Norfolk	0.0007766	NA	0.001178	0.0008309	0.000116	7.673e-05	0.055721		0.000744	NA	0.001653	0.000734	7.232e-05	2.591e-05	0.075078
with-without PRS R2 change			positive = increase in R2
Population	PER3	PDCD6IP	MAPT	CHST6	GRHL2	P4HTM	<10-5 variants
IECC without Sardinia	0.0003811	-0.0019277	9.4e-05	0.000463	0.0002267	0.0001278	-0.0814587
EACC	-4.9e-05	-9.6e-05	9.53e-05	4.38e-05	NA	-0.004011	0.03813
REHS	-0.0007	NA	-0.00161	0.0005169	-0.00224	0.0001335	-0.17897
EPIC-Norfolk	-3.26e-05	NA	0.000475	-9.69e-05	-4.368e-05	-5.082e-05	0.019357
Relative ((with-without PRS/without PRS) R2 change
Population	PER3	PDCD6IP	MAPT	CHST6	GRHL2	P4HTM	<10-5 variants
IECC without Sardinia	0.511612	-0.881436	0.123021	0.133854	0.23388	0.433661	-0.963336
EACC	-0.0979608	-0.0326864	0.120832	0.270872	NA	-0.478983	0.190848
REHS	-0.0998858	NA	-0.0409565	0.584662	-0.0807498	0.164227	-0.0799852
EPIC-Norfolk	-0.0419779	NA	0.403226	-0.116621	-0.376552	-0.662322	0.347391

## Sheet: STable4
Supplementary Table 4: Explained variance of top individual genes using EMMAX-CMC with and without PRS covariates
	without PRS								with PRS
Population	PER3	PDCD6IP	MAPT	CHST6	GRHL2	P4HTM	<10-5 variants		PER3	PDCD6IP	MAPT	CHST6	GRHL2	P4HTM	<10-5 variants
IECC without Sardinia	0.0001305	0.002187	0.0005927	1.723e-05	0.0001036	0.0001009	0.010408		0.0003818	0.0002593	0.0007004	2.79e-05	5.36e-05	9.38e-06	0.012877
EACC	0.000254	0.001929	0.0004216	0.0001617	NA	0.001625	0.022547		0.0002156	0.001582	0.0004397	0.0002055	0.0003564	0.002012	0.058646
REHS	0.004816	NA	0.003949	0.0008841	0.001568	4.599e-05	0.36136		0.004995	NA	0.003842	0.001401	0.0006283	2.36e-05	0.37175
EPIC-Norfolk	9.869e-05	NA	8.114e-05	0.0001926	0.000116	7.673e-05	0.003726		6.914e-05	NA	0.0001232	0.0001162	7.232e-05	2.591e-05	0.003206
with-without PRS R2 change			positive = increase in R2
Population	PER3	PDCD6IP	MAPT	CHST6	GRHL2	P4HTM	<10-5 variants
IECC without Sardinia	0.0002513	-0.0019277	0.0001077	1.067e-05	-5e-05	-9.152e-05	0.002469
EACC	-3.84e-05	-0.000347	1.81e-05	4.38e-05	NA	0.000387	0.036099
REHS	0.000179	NA	-0.000107	0.0005169	-0.0009397	-2.239e-05	0.01039
EPIC-Norfolk	-2.955e-05	NA	4.206e-05	-7.64e-05	-4.368e-05	-5.082e-05	-0.00052
Relative ((with-without PRS/without PRS) R2 change
Population	PER3	PDCD6IP	MAPT	CHST6	GRHL2	P4HTM	<10-5 variants
IECC	1.92567	-0.881436	0.181711	0.619269	-0.482625	-0.907037	0.237221
EACC	-0.151181	-0.179886	0.0429317	0.270872	#VALUE!	0.238154	1.60106
REHS	0.0371678	NA	-0.0270955	0.584662	-0.599298	-0.486845	0.0287525
EPIC-Norfolk	-0.299422	NA	0.518363	-0.396677	-0.376552	-0.662322	-0.13956

## Sheet: STable5
Supplementary Table 5: All Unique Genome-wide Significant Genes
Chr	Gene
1	ACTN2
1	ATP8B2
1	CLK2
1	GSTM5
1	KIAA0040
1	MROH7
1	NDUFS2
1	PER3
1	S100A16
1	S100PBP
1	SPOCD1
1	ST6GALNAC5
1	TPR
1	UAP1
1	USH2A
2	ATG16L1
2	BCS1L
2	EPB41L5
2	IGFBP5
2	INPP5D
2	PARD3B
2	PRLH
2	RRM2
2	STON1
2	TANK
2	TMEM169
2	TRIP12
2	TRPM8
3	ALG3
3	CCR5
3	CLDN18
3	CPB1
3	P4HTM
3	PDCD6IP
3	PDHB
3	PIK3CA
3	SCN5A
4	AFAP1
4	WDFY3
4	ZNF141
5	C5orf42
5	MRPS27
6	AL121963.1
6	CCDC170
6	EPB41L2
6	GCNT2
6	TTK
7	PRKAR1B
7	RBM48
7	SLC13A1
7	SND1
7	THSD7A
7	ZNF498
8	GATA4
8	GRHL2
8	HAS2
8	MROH1
8	NKX6-3
9	ATP6V1G1
9	C9orf156
9	COQ4
9	FBXW5
9	FRMD3
9	GLT6D1
9	GPR21
9	IFT74
9	OR13C5
9	TMEM246
9	ZNF484
10	SYNPO2L
10	VTI1A
10	ZNF25
11	ALKBH3
11	ESAM
11	FERMT3
11	MED19
11	MMP27
11	PPFIA1
11	QSER1
11	SLC43A3
11	WEE1
12	CFAP73
12	FOXM1
12	HCAR1
12	KRT81
12	LIMA1
12	NINJ2
12	RASSF9
13	HSPH1
14	ALDH6A1
14	FAM161B
14	PELI2
15	BUB1B
16	CDYL2
16	CHST6
16	NLRC5
16	RAB11FIP3
16	RNF40
16	VAT1L
17	CLEC10A
17	MAPT
17	SPHK1
17	TNFRSF13B
17	TOB1
17	TTLL6
18	CEP192
18	CHMP1B
18	CIDEA
18	LOXHD1
18	NDC80
19	ARHGAP33
19	C5AR1
19	CCDC9
19	CKM
19	GDF15
19	KLF1
19	LILRA5
19	MUC16
19	PRKD2
19	PRR22
19	RFX2
19	SERTAD3
19	ZNF564
20	EDN3
20	KIF3B
20	RTEL1
20	WISP2
22	APOL2
22	MPST

## Sheet: STable6
Supplementary Table 6: Multiethnic meta-analysis genome-wide significant p-values for EMMAX-VT
Chr	Gene	Meta-pvalue	EACC	EPICNorfolk	BDES	IECC	REHS
19	GDF15	5.12372e-09	0.2	0.99	NA	2e-07	3.4e-05
19	SERTAD3	1e-07	1e-07	NA	NA	NA	NA
5	MRPS27	1.00661e-07	0.78	7.6e-06	0.32	0.75	3.1e-06
3	PDCD6IP	1.06866e-07	0.00041	NA	NA	1.3e-05	NA
7	RBM48	1.73552e-07	0.0016	0.67	0.15	0.52	1e-07
20	EDN3	2e-07	NA	NA	NA	2e-07	NA
18	NDC80	2.57087e-07	0.83	0.2	0.29	0.00046	6e-07
11	PPFIA1	3.1791e-07	0.36	1e-07	0.14	0.0044	0.77
8	NKX6-3	3.21131e-07	0.17	NA	NA	1e-07	NA
12	HCAR1	3.90564e-07	3e-07	0.57	0.49	0.05	0.0052
16	RAB11FIP3	3.93604e-07	1e-07	NA	0.12	0.0157	0.97
18	CEP192	5.64922e-07	1e-07	0.0057	0.45	0.47	0.28
1	ST6GALNAC5	5.84241e-07	0.32	NA	NA	1e-07	NA
2	PRLH	6.53031e-07	0.36	NA	NA	1e-07	NA
10	ZNF25	7e-07	7e-07	NA	NA	NA	NA
9	TMEM246	7.38397e-07	1e-07	NA	NA	0.41	NA
22	APOL2	8.38018e-07	0.22	NA	0.11	1.2e-05	0.0015
17	MAPT	8.56832e-07	0.19	0.039	0.44	0.17	1e-07
2	RRM2	8.80754e-07	NA	NA	0.27	0.0088	1.8e-06
16	CHST6	8.99467e-07	0.56	0.092	0.0095	2e-07	0.6
11	MED19	1.12013e-06	NA	0.015	0.41	0.99	1e-07
9	COQ4	1.22895e-06	0.0065	0.77	0.24	0.71	1e-07
8	GRHL2	1.42444e-06	NA	0.38	0.86	0.0082	3e-07
3	PDHB	1.43627e-06	0.83	NA	NA	1e-07	NA
12	RASSF9	1.47936e-06	0.44	0.61	0.31	0.0128	1e-07
19	CCDC9	1.65003e-06	0.033	0.67	0.034	0.085	1.9e-06
12	NINJ2	1.73766e-06	NA	0.63	0.017	0.045	2.1e-06
1	UAP1	2.27769e-06	0.65	0.43	0.032	0.2	1e-07
19	KLF1	2.4e-06	NA	2.4e-06	NA	NA	NA
2	EPB41L5	2.46669e-06	0.65	0.81	0.022	0.17	1e-07
19	PRR22	3.39845e-06	0.07	0.015	0.39	0.59	1.2e-06
7	SND1	3.4926e-06	0.86	0.076	0.0051	0.29	3.1e-06
8	GATA4	3.5543e-06	0.41	0.063	0.15	1e-07	0.79
6	EPB41L2	3.6316e-06	0.21	0.068	0.22	1	1e-07
12	FOXM1	4.05828e-06	0.102	0.87	0.27	0.15	1e-07
18	CHMP1B	4.2e-06	NA	NA	NA	4.2e-06	NA
22	MPST	4.28563e-06	0.33	NA	0.86	2e-07	0.051
9	GPR21	4.60225e-06	0.51	0.53	NA	1e-07	NA
9	IFT74	6.56912e-06	1e-07	NA	0.7	0.22	0.31
19	ZNF564	6.83142e-06	1.3e-05	NA	0.072	0.045	NA
2	ATG16L1	6.93515e-06	0.34	NA	0.18	7e-07	NA
1	CLK2	8.42877e-06	NA	0.025	0.54	0.79	6e-07
7	ZNF498	9.42155e-06	0.24	0.96	0.75	0.058	1e-07

## Sheet: STable7
Supplementary Table 7: Multiethnic meta-analysis genome-wide significant p-values for ACAT
Chr	Gene	Meta-pvalue	EACC	EPICNorfolk	BDES	IECC	REHS
19	MUC16	9.61e-10	0.103938	0.681784	0.112927	6.01e-12	0.426208
19	GDF15	1.95e-09	0.3751	0.9519	NA	1.32e-07	9.71e-06
3	CCR5	4.56e-09	0.166811	0.329338	0.0623793	0.537158	6.62e-11
1	ST6GALNAC5	6.39e-09	0.3076	NA	NA	9.03e-10	NA
2	PRLH	1.15e-08	NA	NA	NA	1.15e-08	NA
11	MMP27	1.96e-08	0.0879064	9.76e-10	0.9155	0.218839	0.03806
16	CDYL2	4.64e-07	0.572458	0.827781	0.761634	1.11e-10	0.667835
2	RRM2	8.73e-07	NA	NA	0.2754	0.009549	1.61e-06
1	PER3	1.08e-06	0.116044	0.219013	0.480812	0.049848	1.2e-07
11	SLC43A3	1.39e-06	0.2387	NA	NA	4.58e-08	0.6503
1	S100A16	1.4e-06	0.0452442	0.7049	0.4795	5.15e-08	NA
20	WISP2	1.94e-06	NA	0.07106	NA	1.61e-06	NA
8	HAS2	2.61e-06	3.47e-07	NA	NA	0.4507	NA
12	LIMA1	2.63e-06	0.0149088	0.1526	NA	1.05e-06	0.6842
18	LOXHD1	2.68e-06	0.399962	7.23e-06	0.188041	0.00046028	0.87003
8	MROH1	3.65e-06	0.169588	0.77079	0.364291	0.43737	1.52e-08
12	CFAP73	3.79e-06	NA	0.5647	0.7419	0.771695	7.76e-09
11	QSER1	3.98e-06	8.82e-08	0.415731	0.616487	0.033613	0.461348
11	FERMT3	4.03e-06	NA	0.2754	0.0546689	0.459895	3.89e-07
2	ATG16L1	4.1e-06	0.2225	NA	0.2243	4.76e-07	NA
1	ATP8B2	4.69e-06	0.11834	0.171089	0.474056	0.132148	3.38e-07
3	PDCD6IP	4.88e-06	0.000548132	NA	NA	0.000555791	NA
13	HSPH1	5.04e-06	0.436909	0.57865	0.002358	0.245736	3.19e-06
19	RFX2	5.1e-06	0.281522	0.224501	0.157187	6.73e-08	0.709854
1	MROH7	6.57e-06	7.43e-09	0.170463	0.760171	0.805423	0.832014
17	TOB1	6.82e-06	NA	0.6513	NA	6.69e-07	NA
4	AFAP1	9.01e-06	1.63e-05	0.51751	0.9977	0.00107823	0.1046
5	C5orf42	9.91e-06	0.959332	0.165404	0.507687	2.4e-08	0.551538

## Sheet: STable8
Supplementary Table 8: Multiethnic meta-analysis genome-wide significant p-values for EMMAX-CMC
Chr	Gene	Meta-pvalue	EACC	EPICNorfolk	BDES	IECC	REHS
1	ST6GALNAC5	4.23016e-10	0.3076	NA	NA	5.323e-11	NA
19	GDF15	1.12313e-09	0.1558	0.9879	NA	8.498e-08	1.897e-05
3	PDCD6IP	1.44752e-07	0.002177	NA	NA	3.37e-06	NA
2	RRM2	8.7187e-07	NA	NA	0.2754	0.00952	1.613e-06
19	PRKD2	1.02764e-06	0.06254	0.9862	0.5503	0.8019	2.53e-09
12	FOXM1	1.09141e-06	0.2489	0.9551	0.5178	0.4109	1.463e-09
19	ZNF564	1.18969e-06	6.462e-06	NA	0.03817	0.02421	NA
19	KLF1	1.287e-06	NA	1.287e-06	NA	NA	NA
1	KIAA0040	2.88605e-06	0.8859	0.9802	NA	0.3403	6.176e-09
1	S100A16	3.22903e-06	0.1964	0.7055	0.2927	5.129e-08	NA
17	TTLL6	4.96601e-06	5.693e-08	0.1996	0.2663	0.2225	0.6819

## Sheet: STable9
Supplementary Table 9: All multiethnic meta-analysis p-values for EMMAX-VT
Chr	Pos	Gene	Meta-pvalue	EACC pval	EACC Variant Number	EPICNorfolk pval	EPICNorfolk Variant Number	BDES pval	BDES Variant Number	IECC pval	IECC Variant Number	REHS pval	REHS Variant Number
19	18497141	GDF15	5.12372e-09	0.2	2	0.99	2	NA	NA	2e-07	2	3.4e-05	2
19	40947696	SERTAD3	1e-07	1e-07	2	NA	NA	NA	NA	NA	NA	NA	NA
5	71516912	MRPS27	1.00661e-07	0.78	7	7.6e-06	4	0.32	5	0.75	7	3.1e-06	3
3	33877626	PDCD6IP	1.06866e-07	0.00041	3	NA	NA	NA	NA	1.3e-05	5	NA	NA
7	92161827	RBM48	1.73552e-07	0.0016	1	0.67	1	0.15	4	0.52	6	1e-07	2
20	57875916	EDN3	2e-07	NA	NA	NA	NA	NA	NA	2e-07	2	NA	NA
18	2616457	NDC80	2.57087e-07	0.83	1	0.2	2	0.29	3	0.00046	5	6e-07	3
11	70118372	PPFIA1	3.1791e-07	0.36	8	1e-07	4	0.14	5	0.0044	9	0.77	4
8	41504105	NKX6-3	3.21131e-07	0.17	2	NA	NA	NA	NA	1e-07	2	NA	NA
12	123214166	HCAR1	3.90564e-07	3e-07	2	0.57	2	0.49	4	0.05	7	0.0052	3
16	511421	RAB11FIP3	3.93604e-07	1e-07	2	NA	NA	0.12	2	0.0157	5	0.97	5
18	13001512	CEP192	5.64922e-07	1e-07	8	0.0057	11	0.45	17	0.47	29	0.28	18
1	77528749	ST6GALNAC5	5.84241e-07	0.32	1	NA	NA	NA	NA	1e-07	1	NA	NA
2	238475278	PRLH	6.53031e-07	0.36	2	NA	NA	NA	NA	1e-07	2	NA	NA
10	38241067	ZNF25	7e-07	7e-07	5	NA	NA	NA	NA	NA	NA	NA	NA
9	104238467	TMEM246	7.38397e-07	1e-07	2	NA	NA	NA	NA	0.41	4	NA	NA
22	36623920	APOL2	8.38018e-07	0.22	3	NA	NA	0.11	6	1.2e-05	6	0.0015	3
17	44039717	MAPT	8.56832e-07	0.19	9	0.039	7	0.44	6	0.17	12	1e-07	7
2	10262920	RRM2	8.80754e-07	NA	NA	NA	NA	0.27	1	0.0088	1	1.8e-06	1
16	75512672	CHST6	8.99467e-07	0.56	3	0.092	9	0.0095	4	2e-07	6	0.6	3
11	57479507	MED19	1.12013e-06	NA	NA	0.015	1	0.41	3	0.99	4	1e-07	2
9	131085320	COQ4	1.22895e-06	0.0065	5	0.77	2	0.24	3	0.71	6	1e-07	2
8	102555474	GRHL2	1.42444e-06	NA	NA	0.38	1	0.86	2	0.0082	5	3e-07	2
3	58419529	PDHB	1.43627e-06	0.83	1	NA	NA	NA	NA	1e-07	4	NA	NA
12	86198935	RASSF9	1.47936e-06	0.44	2	0.61	2	0.31	5	0.0128	9	1e-07	3
19	47767890	CCDC9	1.65003e-06	0.033	5	0.67	3	0.034	4	0.085	5	1.9e-06	5
12	674486	NINJ2	1.73766e-06	NA	NA	0.63	1	0.017	6	0.045	4	2.1e-06	2
1	162535958	UAP1	2.27769e-06	0.65	4	0.43	2	0.032	3	0.2	5	1e-07	2
19	12995797	KLF1	2.4e-06	NA	NA	2.4e-06	3	NA	NA	NA	NA	NA	NA
2	120776731	EPB41L5	2.46669e-06	0.65	10	0.81	7	0.022	5	0.17	9	1e-07	2
19	5783323	PRR22	3.39845e-06	0.07	3	0.015	2	0.39	2	0.59	2	1.2e-06	2
7	127343354	SND1	3.4926e-06	0.86	3	0.076	3	0.0051	3	0.29	9	3.1e-06	4
8	11607635	GATA4	3.5543e-06	0.41	7	0.063	21	0.15	5	1e-07	5	0.79	3
6	131179302	EPB41L2	3.6316e-06	0.21	12	0.068	4	0.22	10	1	14	1e-07	8
12	2967949	FOXM1	4.05828e-06	0.102	13	0.87	4	0.27	9	0.15	13	1e-07	6
18	11851686	CHMP1B	4.2e-06	NA	NA	NA	NA	NA	NA	4.2e-06	2	NA	NA
22	37420713	MPST	4.28563e-06	0.33	2	NA	NA	0.86	2	2e-07	4	0.051	2
9	125796939	GPR21	4.60225e-06	0.51	2	0.53	1	NA	NA	1e-07	3	NA	NA
9	26978157	IFT74	6.56912e-06	1e-07	6	NA	NA	0.7	2	0.22	11	0.31	4
19	12637322	ZNF564	6.83142e-06	1.3e-05	2	NA	NA	0.072	2	0.045	2	NA	NA
2	234178662	ATG16L1	6.93515e-06	0.34	2	NA	NA	0.18	1	7e-07	2	NA	NA
1	155240602	CLK2	8.42877e-06	NA	NA	0.025	2	0.54	3	0.79	5	6e-07	3
7	99217536	ZNF498	9.42155e-06	0.24	4	0.96	1	0.75	2	0.058	3	1e-07	2
19	54818795	LILRA5	1.0189e-05	0.59	3	NA	NA	NA	NA	0.56	2	2e-07	2
15	43482543	CCNDBP1	1.10876e-05	NA	NA	0.22	3	0.082	3	7e-07	6	0.7	2
1	204507383	MDM4	1.13417e-05	NA	NA	0.36	3	0.97	4	0.26	5	1e-07	4
1	248844695	OR14I1	1.44176e-05	0.19	4	0.069	3	0.42	4	0.059	7	5.2e-06	2
2	217542888	IGFBP5	1.51648e-05	1	3	0.2	1	NA	NA	0.64	3	1e-07	2
9	95608634	ZNF484	1.56301e-05	0.71	4	0.75	1	0.73	8	4e-07	8	0.012	4
3	49039984	P4HTM	1.64538e-05	1e-07	4	0.51	1	0.29	2	0.24	4	0.56	2
16	30775692	RNF40	1.68228e-05	0.28	1	1.2e-06	2	0.76	2	0.016	3	0.5	3
1	153580072	S100A16	1.76457e-05	0.23	2	0.74	1	0.45	2	2e-07	1	NA	NA
9	107360769	OR13C5	1.79044e-05	1e-07	2	0.22	2	NA	NA	0.77	5	0.92	3
1	57395130	C8B	1.792e-05	0.00041	15	0.0045	3	0.15	8	0.042	12	0.19	9
7	99621870	ZKSCAN1	1.90955e-05	0.24	3	0.29	2	0.52	2	0.66	3	1e-07	3
1	186313108	TPR	1.99924e-05	0.99	8	0.76	9	0.14	12	0.0016	18	1.5e-05	12
16	77822740	VAT1L	2.03249e-05	0.45	6	0.61	1	0.66	2	1e-07	5	NA	NA
6	116442491	AL121963.1	2.05545e-05	0.71	5	0.07	1	0.47	3	8e-07	4	0.14	2
18	12277150	CIDEA	2.16629e-05	0.72	1	0.75	3	0.022	6	0.47	7	5e-07	4
17	6978452	CLEC10A	2.24759e-05	2e-07	6	0.27	2	0.32	3	0.19	9	0.89	2
16	3117378	IL32	2.33952e-05	0.3	3	0.064	5	0.28	4	0.084	5	6.8e-06	4
3	46414470	CCR5	2.34677e-05	0.04	11	0.52	6	0.38	4	0.78	6	5e-07	6
12	113587667	CCDC42B	2.46081e-05	NA	NA	0.54	1	0.52	3	0.81	3	1e-07	2
14	74401030	FAM161B	2.46186e-05	0.84	8	1e-07	4	0.59	8	0.44	13	0.15	6
2	234054873	INPP5D	2.64865e-05	0.58	3	0.13	3	0.5	8	1e-07	11	0.95	9
1	32829448	TSSK3	2.71143e-05	NA	NA	0.66	1	NA	NA	2.9e-06	6	NA	NA
3	196098796	UBXN7	2.74323e-05	NA	NA	0.24	1	0.046	1	3.5e-06	1	0.67	1
17	74381555	SPHK1	2.75593e-05	0.64	2	0.3	4	0.71	4	0.0092	8	3e-06	4
6	80717676	TTK	2.76627e-05	1e-07	5	0.78	2	0.43	3	0.23	14	0.49	5
15	74174064	TBC1D21	2.77901e-05	0.11	2	0.64	2	0.36	2	0.75	2	2e-07	2
7	24738788	DFNA5	2.82172e-05	0.22	6	0.52	2	0.37	1	0.0113	8	8.1e-06	3
12	52680049	KRT81	2.91617e-05	0.91	4	0.32	4	0.77	2	0.18	6	1e-07	3
3	178927410	PIK3CA	3.00118e-05	0.35	1	NA	NA	NA	NA	6.1e-06	1	NA	NA
5	66478729	CD180	3.00202e-05	0.42	7	NA	NA	0.24	4	0.26	8	1.1e-06	2
11	132306610	OPCML	3.04427e-05	NA	NA	0.99	1	0.21	1	3e-07	2	0.47	1
19	45810035	CKM	3.0826e-05	0.66	3	0.48	2	0.35	5	0.39	5	1e-07	2
1	33291818	S100PBP	3.098e-05	1e-07	2	0.3	2	0.56	3	0.74	5	0.35	1
19	35648365	FXYD5	3.13282e-05	4.3e-05	3	NA	NA	NA	NA	0.052	4	NA	NA
19	36270052	ARHGAP33	3.27923e-05	0.98	3	0.68	2	0.73	4	0.0096	8	1e-06	3
16	50100059	HEATR3	3.42216e-05	0.28	3	0.55	2	0.39	5	0.02	7	4.1e-06	4
2	175962173	ATF2	3.42955e-05	NA	NA	0.25	1	0.13	3	0.2	4	5.2e-06	2
3	183774022	HTR3C	3.64118e-05	3.4e-05	5	0.63	2	0.06	4	0.23	3	0.018	2
1	113252882	PPM1J	4.09583e-05	0.38	9	0.21	4	0.22	4	0.13	5	2.7e-06	5
1	45219435	KIF2C	4.13622e-05	0.102	5	NA	NA	0.55	3	0.0029	4	0.00026	3
1	175130119	KIAA0040	4.51444e-05	0.87	1	1	1	NA	NA	0.54	2	1e-07	2
19	47197177	PRKD2	4.88741e-05	0.14	3	1	4	0.61	3	0.9	3	1e-07	3
11	124623558	ESAM	5.15019e-05	1e-07	3	0.87	2	0.88	6	0.67	9	0.16	5
2	201253956	SPATS2L	5.29556e-05	NA	NA	0.76	1	0.26	3	3e-07	7	0.96	3
21	34640780	IL10RB	5.34203e-05	0.027	3	NA	NA	0.3	2	1	5	7.1e-06	3
16	80646633	CDYL2	5.36183e-05	0.65	2	0.93	7	0.17	6	1e-07	8	0.84	7
1	236902672	ACTN2	5.42736e-05	1e-07	2	1	6	0.88	4	0.12	16	0.83	6
12	21620419	PYROXD1	5.55909e-05	0.85	2	NA	NA	0.13	2	0.42	2	1.3e-06	2
2	210517947	MAP2	5.6096e-05	0.42	12	0.71	5	0.036	9	0.37	19	2.3e-06	11
1	27267996	NUDC	5.73512e-05	0.0004	5	NA	NA	0.18	3	0.3	6	0.0029	2
17	46847364	TTLL6	5.89825e-05	3e-07	6	0.54	4	0.52	8	0.77	13	0.15	6
20	42194972	SGK2	6.09333e-05	0.61	3	1e-07	5	0.67	4	0.31	3	0.8	2
14	93652681	RP11-371E8.4	6.32752e-05	0.31	3	0.0093	2	0.96	2	0.016	2	0.00024	2
20	3802803	AP5S1	6.68893e-05	0.45	3	0.71	1	NA	NA	0.59	3	4e-07	2
4	20255442	SLIT2	7.33466e-05	0.018	6	0.86	6	0.68	11	0.16	16	7.6e-06	6
1	161172233	NDUFS2	7.51981e-05	1.1e-06	4	0.74	7	0.11	1	0.97	5	NA	NA
2	170441001	PPIG	7.53585e-05	0.88	5	NA	NA	0.38	2	4.2e-06	9	0.062	6
1	113068652	ST7L	7.5478e-05	0.71	5	0.026	4	0.79	7	0.13	9	7e-06	6
3	184550501	VPS8	7.63088e-05	0.0019	7	0.3	7	0.11	12	0.58	13	0.00037	7
14	23842552	IL25	7.68629e-05	0.29	4	0.87	1	0.02	3	0.69	2	3.9e-06	3
9	125616279	RC3H2	7.94202e-05	0.95	2	0.37	1	0.66	6	1e-07	9	0.61	4
18	19153475	ESCO1	7.96739e-05	1.3e-05	7	0.04	3	0.22	4	0.54	6	0.23	3
5	139930726	SRA1	8.27444e-05	0.29	1	0.056	3	0.19	3	0.046	9	0.000105	3
19	10736346	SLC44A2	8.31228e-05	0.42	2	0.35	1	0.103	5	4.5e-06	9	0.22	6
6	26091179	HFE	9.05307e-05	6.1e-05	3	0.92	15	0.38	7	0.027	7	0.029	4
5	79950781	MSH3	9.28867e-05	0.66	8	0.66	8	0.88	7	0.45	11	1e-07	5
20	30898131	KIF3B	9.34926e-05	8e-07	2	NA	NA	0.24	1	0.64	3	0.92	2
3	183960671	ALG3	9.41157e-05	1e-07	3	0.63	2	0.64	1	0.5	4	0.87	3
10	45430394	TMEM72	9.55827e-05	0.72	2	NA	NA	0.32	2	0.72	3	7e-07	2
12	47471555	AMIGO2	9.5694e-05	0.0012	2	0.24	1	0.012	3	0.071	5	0.073	4
1	44877962	RNF220	9.80087e-05	NA	NA	NA	NA	NA	NA	0.59	6	1.3e-05	2
11	35454214	PAMR1	0.000100124	0.34	10	0.0054	5	0.2	11	0.063	11	0.00082	8
5	68715310	MARVELD2	0.000103809	6.6e-05	4	0.022	6	0.03	6	0.47	7	0.97	4
8	139163791	FAM135B	0.000103942	0.0024	9	0.4	3	0.4	9	0.14	17	0.00037	9
11	102562574	MMP27	0.000104227	0.069	4	6.5e-06	3	0.69	2	0.43	8	0.15	4
1	110257814	GSTM5	0.000107266	1.9e-06	2	0.2	1	0.37	2	0.95	4	NA	NA
1	183852914	RGL1	0.000107769	0.17	2	5e-06	2	0.35	2	0.2	5	0.35	2
3	186760560	ST6GAL1	0.00010822	1.17e-05	2	NA	NA	NA	NA	0.73	1	NA	NA
8	124195140	FAM83A	0.000109853	0.81	4	0.21	4	0.16	3	8e-07	6	0.98	4
2	131520034	FAM123C	0.000110909	0.96	8	NA	NA	0.23	5	0.9	4	7e-07	2
3	32398997	CMTM8	0.000111036	0.27	2	0.43	1	0.69	2	0.15	5	1.8e-06	3
3	119248689	CD80	0.000111821	0.00015	3	NA	NA	NA	NA	0.059	4	NA	NA
3	133921601	RYK	0.000113565	0.05	1	NA	NA	NA	NA	0.00018	2	NA	NA
1	172501617	SUCO	0.000114248	0.051	3	0.61	4	0.3	4	0.89	8	2.7e-06	2
2	234959653	SPP2	0.00011635	0.77	2	NA	NA	NA	NA	1.2e-05	2	NA	NA
1	154309887	ATP8B2	0.000118251	0.033	7	0.086	4	0.86	7	0.3	11	3.2e-05	5
5	143586474	KCTD16	0.00011959	0.61	3	0.14	1	0.071	3	1.4e-05	5	0.28	2
3	137742541	CLDN18	0.000146734	6.5e-06	2	0.83	3	0.59	2	0.019	3	0.51	3
3	9854630	TTLL3	0.000160985	0.017	13	0.037	3	0.24	14	0.00025	19	0.92	15
10	70182061	DNA2	0.000161329	0.048	3	0.24	7	0.046	5	0.9	14	7.3e-05	8
2	48807796	STON1	0.000163979	0.35	4	0.16	5	0.00023	9	0.023	15	0.12	5
10	70960160	SUPV3L1	0.000164449	0.16	4	NA	NA	0.61	4	0.96	7	2.4e-06	4
3	52570892	C3orf78	0.000166126	NA	NA	0.84	1	NA	NA	2.9e-06	1	0.66	1
5	157098756	C5orf52	0.000169132	NA	NA	0.0012	1	0.0072	3	0.19	3	NA	NA
8	94745648	RBM12B	0.000171757	0.39	7	0.79	3	0.55	5	0.106	6	2.1e-06	2
14	74535660	ALDH6A1	0.000177261	3e-07	2	0.58	4	0.36	4	0.95	5	0.66	2
14	33004851	AKAP6	0.000178336	0.000155	17	1	8	0.95	19	0.112	22	0.0024	11
21	45209559	RRP1	0.00018752	0.0043	8	0.069	4	0.96	5	0.00038	7	0.39	5
2	74757239	HTRA2	0.000190164	0.0003	2	0.76	1	0.63	2	0.68	3	0.00044	2
3	134214167	CEP63	0.000190308	0.00059	6	0.97	3	0.87	5	0.00012	10	0.72	5
4	128554293	INTU	0.000191082	0.88	9	1.4e-06	4	0.5	6	0.27	10	0.26	4
5	79024779	CMYA5	0.000192832	0.69	38	0.052	25	0.052	40	0.067	64	0.00035	39
5	140558528	PCDHB8	0.000195902	0.72	2	NA	NA	0.43	1	0.9	3	1e-06	2
19	41284295	RAB4B	0.000207868	NA	NA	NA	NA	0.22	3	7.9e-05	3	NA	NA
12	50571691	LIMA1	0.000210031	0.012	4	0.39	2	0.92	4	1.8e-05	6	0.63	3
8	82606074	SLC10A5	0.000210107	0.63	3	0.11	2	0.24	4	0.33	8	8.9e-06	4
10	125769691	CHST15	0.000213576	0.6	9	0.62	1	0.00014	2	0.93	9	0.00103	2
17	7760054	LSMD1	0.000213724	0.078	1	0.48	1	0.82	1	1.01e-05	3	NA	NA
16	23364276	SCNN1B	0.000216028	0.45	7	1	13	0.5	12	0.00015	16	0.0015	7
11	67161010	RAD9A	0.000221627	0.71	5	NA	NA	0.59	4	0.86	6	9e-07	2
16	57147265	CPNE2	0.00022555	NA	NA	NA	NA	NA	NA	2e-05	4	0.95	2
9	21141089	IFNW1	0.000227104	0.51	1	0.71	1	0.071	2	0.6	2	3.5e-06	2
3	128780823	GP9	0.00023	NA	NA	NA	NA	NA	NA	0.00023	2	NA	NA
16	88643704	ZC3H18	0.000237673	0.00068	11	0.59	7	0.98	9	0.26	11	0.00056	7
19	501695	MADCAM1	0.000238402	0.003	3	0.51	3	NA	NA	0.0016	6	NA	NA
4	366594	ZNF141	0.000248418	1e-07	2	0.87	2	1	1	0.86	2	0.81	2
9	100672338	C9orf156	0.000249077	2e-07	2	0.86	4	0.61	5	0.63	6	0.92	3
12	18435035	PIK3C2G	0.000249792	0.02	13	0.55	8	1.7e-05	17	0.96	27	0.34	17
12	6981526	SPSB2	0.00025222	NA	NA	0.16	2	NA	NA	1.9e-05	3	0.86	2
11	9606879	WEE1	0.000254968	5.5e-06	1	0.83	1	NA	NA	0.58	1	NA	NA
19	14023342	CC2D1A	0.000256632	0.48	8	0.35	9	0.022	5	5.7e-05	12	0.3	9
1	120295173	HMGCS2	0.000257782	0.42	5	0.21	4	0.21	4	0.0026	7	0.00132	4
12	71523134	TSPAN8	0.000277211	0.116	2	0.76	1	0.75	2	0.44	6	2.4e-06	3
5	135186141	SLC25A48	0.000278185	NA	NA	0.8	3	0.55	3	0.39	4	2.5e-06	3
16	54318165	IRX3	0.00028	0.00028	2	NA	NA	NA	NA	NA	NA	NA	NA
9	132501906	PTGES	0.00028	NA	NA	NA	NA	NA	NA	0.00028	1	NA	NA
11	124440362	OR8A1	0.000298004	0.4	3	0.029	1	0.17	5	5.4e-05	6	0.72	3
22	35779124	HMOX1	0.000304572	0.62	5	0.0014	2	0.59	3	0.11	8	0.0014	4
19	8959693	AC008734.2	0.000305169	0.63	13	0.58	11	0.0092	10	0.0056	19	0.0042	8
8	98289721	TSPYL5	0.000305684	0.29	1	0.2	3	0.55	3	0.69	3	3.6e-06	3
13	31712572	HSPH1	0.000319246	0.3	2	0.77	3	0.014	3	0.54	6	4.8e-05	2
12	101560328	SLC5A8	0.000321897	0.11	6	0.62	2	0.0087	4	0.00042	9	0.34	4
10	43650944	CSGALNACT2	0.000322396	0.13	1	NA	NA	6.7e-05	1	0.4	5	NA	NA
16	89940232	TCF25	0.000322778	0.95	2	0.45	6	7.8e-05	6	0.003	8	0.85	4
7	122755609	SLC13A1	0.000330399	3.9e-06	9	0.12	5	0.51	6	0.54	12	0.68	3
4	114376933	CAMK2D	0.00036503	2.9e-05	1	0.3	1	0.95	3	0.17	2	0.071	2
16	3273905	ZNF200	0.000387148	0.72	11	0.29	2	0.34	5	3.7e-05	9	0.041	4
9	117354865	ATP6V1G1	0.000396416	2.8e-06	2	NA	NA	0.65	2	0.43	3	0.85	1
10	21104555	NEBL	0.000397645	0.011	8	0.8	11	0.9	10	2.2e-05	21	0.64	11
19	45206789	CEACAM16	0.000400237	0.97	3	0.11	3	0.085	3	3.1e-05	4	0.4	1
11	43904691	ALKBH3	0.000410027	0.64	3	2.6e-05	4	0.47	5	0.28	7	0.053	5
9	37495255	POLR1E	0.000410239	0.012	5	0.0015	2	0.0078	1	0.88	6	0.94	3
5	140263018	PCDHA13	0.000411912	0.65	4	0.27	7	0.56	3	0.54	5	2.2e-06	5
2	167262143	SCN7A	0.000412289	6.2e-05	12	0.42	7	0.53	15	0.0121	24	0.7	15
5	140166395	PCDHA1	0.000415588	0.9	7	6e-07	8	0.56	4	0.42	11	0.93	6
17	40272106	CTD-2132N18.3	0.000427884	3.8e-05	2	0.25	2	0.55	2	0.14	2	NA	NA
1	210857116	KCNH1	0.000429245	0.53	2	NA	NA	4.6e-05	4	0.2	3	NA	NA
14	105404534	AHNAK2	0.000460741	0.14	20	0.51	27	0.14	17	0.52	28	2.6e-05	19
1	2441358	PANK4	0.000461037	0.4	1	NA	NA	NA	NA	0.051	5	0.00026	2
2	127956952	CYP27C1	0.000476932	NA	NA	5.3e-05	3	1	2	0.02	3	0.79	1
9	138516119	GLT6D1	0.000477467	6.1e-06	4	0.31	2	0.8	4	0.24	4	0.39	3
12	55820104	OR6C76	0.00047877	0.49	3	0.6	1	NA	NA	0.54	5	5.3e-06	2
8	72936145	TRPA1	0.00049131	0.00024	7	0.048	6	0.58	4	0.022	7	1	4
3	52455721	PHF7	0.000491599	0.34	2	0.00018	1	0.049	4	0.29	2	NA	NA
5	140864784	PCDHGC4	0.000492744	0.17	8	0.00026	4	0.6	9	0.107	10	0.052	7
18	59854886	KIAA1468	0.000493966	0.74	7	0.13	2	0.62	2	0.73	5	3.4e-06	6
5	77298814	AP3B1	0.000496274	0.93	5	0.46	4	0.32	9	0.64	13	1.7e-06	6
12	106704974	TCP11L2	0.000498169	0.33	4	0.84	2	0.2	3	0.15	6	1.8e-05	2
13	26117492	ATP8A2	0.000501684	0.079	4	0.083	4	0.002	5	0.016	5	0.72	7
11	59860922	MS4A2	0.000523222	0.33	3	0.26	2	0.38	5	0.72	7	6.8e-06	3
11	73141742	FAM168A	0.00053	NA	NA	NA	NA	NA	NA	0.00053	1	NA	NA
12	123970282	RILPL1	0.000544899	1.9e-05	4	NA	NA	1	1	0.34	3	NA	NA
19	51981792	CEACAM18	0.000553267	0.36	2	0.0028	5	0.71	5	0.0012	10	0.2	6
6	149846300	PPIL4	0.000564763	0.48	1	0.0054	1	NA	NA	0.0026	4	NA	NA
7	30921965	AQP1	0.00056906	0.87	8	0.12	6	0.32	4	5.5e-06	7	0.97	5
1	155896514	KIAA0907	0.00057	0.00057	2	NA	NA	NA	NA	NA	NA	NA	NA
8	101717149	PABPC1	0.000573812	NA	NA	0.23	2	NA	NA	0.00023	3	NA	NA
13	20224202	MPHOSPH8	0.000586576	0.87	1	0.81	1	0.56	3	0.94	7	5e-07	3
17	16347325	FAM211A	0.000597976	0.16	2	0.56	4	NA	NA	0.31	3	4e-05	2
8	145223221	HEATR7A	0.000601551	0.56	3	0.55	3	0.83	5	0.75	8	1e-06	2
20	43610574	STK4	0.000605853	0.84	4	0.8	2	0.72	2	5e-07	4	0.8	4
7	11500346	THSD7A	0.000607295	5.1e-06	4	0.39	1	0.14	8	0.84	17	0.83	6
19	58639808	ZNF329	0.000617701	0.82	2	0.082	5	0.021	2	0.074	6	0.0019	2
2	242255830	2020-09-02	0.000625805	NA	NA	0.26	2	0.2	2	0.78	2	2.9e-05	2
1	32834055	BSDC1	0.000628613	0.96	4	0.0042	1	0.00013	3	0.76	4	0.51	1
1	163297293	NUF2	0.000636097	3.3e-05	5	0.59	4	0.103	5	0.105	5	0.98	3
10	121086097	GRK5	0.000655884	0.038	5	0.00019	2	0.18	3	0.96	5	NA	NA
15	74703101	SEMA7A	0.000660538	0.74	11	0.54	6	0.16	3	0.00106	9	0.0032	5
2	238002837	COPS8	0.000670425	0.04	1	NA	NA	NA	NA	0.00157	2	NA	NA
17	8380305	MYH10	0.000671005	0.66	5	0.044	3	0.17	5	0.69	10	6.5e-05	2
19	42791482	CIC	0.0006849	0.62	6	0.42	1	0.2	2	4.8e-06	8	0.91	3
3	182681777	DCUN1D1	0.0007	0.0007	1	NA	NA	NA	NA	NA	NA	NA	NA
3	58486772	KCTD6	0.0007	NA	NA	NA	NA	NA	NA	0.0007	2	NA	NA
19	16764936	C19orf42	0.000719902	NA	NA	0.69	1	0.93	2	1.4e-05	2	NA	NA
16	58538309	NDRG4	0.000749349	0.86	4	0.00026	2	0.062	2	0.42	3	0.044	1
14	93652681	TMEM251	0.000755354	0.31	3	0.018	3	1	3	0.16	4	0.00029	3
12	53491511	IGFBP6	0.00076	NA	NA	NA	NA	NA	NA	0.00076	2	NA	NA
4	165961438	TRIM60	0.000762671	0.6	4	0.00041	5	0.41	6	0.013	10	0.2	5
4	48896023	OCIAD2	0.000765266	0.35	2	NA	NA	0.23	1	0.00012	4	NA	NA
5	167993100	PANK3	0.000777847	NA	NA	NA	NA	0.02	1	0.0037	1	NA	NA
4	55127448	PDGFRA	0.000796099	0.036	5	0.66	12	0.11	7	0.00018	10	0.59	3
16	5097882	C16orf89	0.000796739	0.023	3	0.14	2	0.017	5	0.0054	8	0.94	3
1	47717238	STIL	0.000806197	1.5e-05	7	0.8	4	0.6	8	0.28	15	0.14	8
12	4829956	GALNT8	0.000817962	0.6	11	0.14	9	0.73	8	0.68	13	6.9e-06	4
2	120567499	PTPN4	0.000818316	0.95	5	0.74	2	0.35	5	0.65	7	1.8e-06	3
16	85834818	COX4I1	0.000819569	NA	NA	NA	NA	NA	NA	0.00014	1	0.56	1
10	73199595	CDH23	0.000840972	0.39	32	0.28	36	0.71	37	0.35	51	1.1e-05	28
19	51503285	KLK8	0.000842881	0.7	2	0.18	1	8.6e-05	3	NA	NA	NA	NA
3	49004687	ARIH2	0.00085	NA	NA	NA	NA	NA	NA	0.00085	1	NA	NA
18	44266176	ST8SIA5	0.000850384	0.33	4	0.0075	3	0.6	5	0.12	7	0.0017	3
12	8800767	MFAP5	0.00085512	NA	NA	NA	NA	NA	NA	0.83	2	9.9e-05	2
21	43733628	TFF3	0.000856166	0.0106	3	0.31	1	0.96	1	0.51	2	0.00019	1
15	78917573	CHRNB4	0.000868832	0.055	6	0.0035	9	0.023	5	0.64	10	0.11	6
3	15719049	ANKRD28	0.000902167	0.28	5	0.32	4	0.101	3	0.051	10	0.00071	5
9	80858484	CEP78	0.000903994	0.58	3	0.99	6	0.17	5	0.99	7	3.4e-06	5
9	85863069	FRMD3	0.000905166	6e-07	2	0.94	5	0.79	5	0.83	7	0.89	4
15	42126939	JMJD7-PLA2G4B	0.000916581	0.49	18	5.1e-05	6	0.096	18	0.31	31	0.45	15
12	101336201	ANO4	0.000932287	0.39	4	0.00022	1	0.13	1	0.033	5	0.93	2
11	63713377	NAA40	0.000940567	0.11	1	0.6	2	0.064	2	0.41	2	0.0002	2
9	139656670	LCN15	0.000969727	NA	NA	0.87	1	0.92	2	1.6e-05	3	NA	NA
14	73961982	HEATR4	0.0010046	0.23	15	0.71	4	0.73	7	0.61	16	5.2e-06	10
11	67203388	PTPRCAP	0.00102652	0.56	3	NA	NA	0.47	2	9.7e-06	3	0.86	2
15	42133086	PLA2G4B	0.00103006	0.19	13	3.8e-05	4	0.19	14	0.3	20	0.95	11
5	1268697	TERT	0.00104222	0.64	2	0.54	21	0.76	2	0.0028	2	0.00054	2
15	85326955	ZNF592	0.00105172	0.64	3	0.85	3	0.13	6	0.00098	9	0.0058	3
4	110581363	CCDC109B	0.00105785	NA	NA	0.55	4	0.064	3	0.8	7	8.1e-05	2
9	34255885	KIF24	0.00106928	4.3e-05	9	0.81	9	0.19	5	0.9	15	0.069	14
16	2287458	DNASE1L2	0.00107494	0.68	2	0.51	5	0.27	6	0.34	9	1.3e-05	7
14	23342582	LRP10	0.00107609	0.013	5	0.36	2	0.41	7	0.9	10	0.00024	7
7	56007584	ZNF713	0.0011254	0.00017	1	0.18	1	NA	NA	0.5	4	NA	NA
2	48807796	STON1-GTF2A1L	0.00113397	0.63	10	0.2	7	0.00035	11	0.048	18	0.21	6
13	31205171	USPL1	0.0011393	0.49	7	0.38	4	0.84	10	0.013	22	0.00022	11
6	151869451	CCDC170	0.00114622	0.00073	11	0.2	6	0.36	11	0.26	22	0.033	8
19	863220	CFD	0.00116865	NA	NA	NA	NA	0.41	1	0.64	2	6.1e-05	2
18	61377548	SERPINB11	0.00117041	0.46	4	0.47	2	0.0075	6	0.11	10	0.0026	4
11	58891850	FAM111B	0.00119397	0.00081	4	NA	NA	0.51	4	0.28	7	0.023	2
19	47823038	C5AR1	0.00119454	1.5e-06	4	0.57	3	0.83	8	0.92	7	0.73	5
10	75005894	DNAJC9	0.0012	NA	NA	NA	NA	NA	NA	0.0012	2	NA	NA
16	2263822	PGP	0.00122253	NA	NA	0.62	1	0.067	2	0.033	2	0.002	2
1	231362783	C1orf131	0.00122338	0.000126	3	NA	NA	NA	NA	0.97	4	NA	NA
19	282274	PPAP2C	0.00124987	0.51	3	0.000124	3	0.52	7	0.14	10	0.11	4
19	50939276	MYBPC2	0.0012663	0.18	17	0.023	8	0.91	16	0.19	19	0.00072	10
7	87563794	ADAM22	0.00127535	0.0016	2	0.0105	1	0.89	4	0.06	9	0.58	4
11	63974966	FERMT3	0.00132768	0.7	2	0.32	2	0.26	5	0.41	6	2.3e-05	3
3	101060506	SENP7	0.0013337	0.28	7	4.9e-05	3	0.81	4	0.113	10	0.44	6
6	42176643	MRPS10	0.0013396	NA	NA	0.0085	2	0.82	4	0.0017	6	0.26	2
19	16060117	OR10H4	0.00134213	0.000105	4	0.54	2	0.36	10	0.78	8	0.035	4
1	31883259	SERINC2	0.00135338	9e-05	10	0.047	4	0.42	8	0.61	16	0.52	9
17	48940422	TOB1	0.00136991	NA	NA	0.66	1	NA	NA	0.00021	2	NA	NA
17	79632308	OXLD1	0.0014	NA	NA	NA	NA	NA	NA	0.0014	2	NA	NA
19	3728642	TJP3	0.0014188	0.65	5	0.6	12	0.26	14	0.94	17	6.3e-06	10
10	112837873	ADRA2A	0.00144675	NA	NA	0.88	3	0.47	1	5e-05	2	NA	NA
5	140236328	PCDHA10	0.00145894	0.67	4	0.85	4	0.85	2	0.56	4	2.3e-06	5
8	122626383	HAS2	0.0014628	0.00071	4	NA	NA	NA	NA	0.21	1	NA	NA
16	23536684	EARS2	0.00147511	0.97	4	0.39	7	0.85	5	0.48	9	4.1e-06	4
10	102566298	PAX2	0.0015	NA	NA	NA	NA	NA	NA	0.0015	2	NA	NA
14	100847320	WDR25	0.00150239	0.0067	6	0.49	3	0.79	5	0.41	8	0.00061	7
19	58867597	ZNF497	0.0015307	0.31	2	NA	NA	0.16	3	0.0127	4	0.0058	1
9	5231539	INSL4	0.00155913	0.58	2	0.56	2	0.0096	3	0.27	7	0.00081	2
19	56001665	SSC5D	0.00156422	0.00012	4	0.64	2	0.153	6	0.087	10	0.67	7
12	108082253	PWP1	0.00157597	0.16	1	0.4	5	0.11	4	0.00108	6	0.091	4
12	54894320	NCKAP1L	0.00158793	0.55	6	0.088	7	0.83	6	2e-05	12	0.87	7
2	27665973	KRTCAP3	0.00159598	0.53	2	NA	NA	NA	NA	0.00031	2	NA	NA
9	79634693	FOXB2	0.0016	NA	NA	NA	NA	NA	NA	0.0016	2	NA	NA
8	32453358	NRG1	0.00160353	0.82	12	0.35	3	0.29	9	0.23	17	3.7e-05	9
12	50497834	GPD1	0.00165805	6.4e-05	9	0.23	4	0.092	9	0.72	12	0.76	8
19	58517342	CTD-2368P22.1	0.0017	NA	NA	0.0017	1	NA	NA	NA	NA	NA	NA
1	41499706	SCMH1	0.00171563	0.018	8	0.103	4	0.023	5	0.035	6	0.52	4
10	97772358	CC2D2B	0.00171653	0.81	5	NA	NA	NA	NA	0.00022	3	NA	NA
13	52603112	UTP14C	0.00173931	0.67	6	0.84	2	0.33	7	0.99	14	4.3e-06	5
15	50733640	USP8	0.00174241	0.72	7	1	2	0.56	1	1.07e-05	2	NA	NA
6	11190642	NEDD9	0.00174942	0.77	3	0.22	3	0.7	6	1.4e-05	11	0.48	4
20	44330799	WFDC13	0.00176104	NA	NA	NA	NA	0.56	2	0.36	3	0.00013	2
3	168802737	MECOM	0.00177378	0.6	9	5.2e-05	7	0.043	4	0.68	10	0.89	5
10	38343772	ZNF33A	0.00178507	1.08e-05	5	0.93	5	0.14	3	0.64	6	0.91	3
17	38926124	KRT26	0.00181103	0.29	4	0.014	4	0.11	9	0.055	8	0.034	6
3	121575986	EAF2	0.00182591	0.68	2	0.77	2	0.0014	2	0.0018	3	0.64	2
1	231829700	DISC1	0.0018263	0.49	4	0.43	6	0.0151	9	0.45	15	0.00059	9
9	91616590	S1PR3	0.00184481	0.62	4	2.7e-06	4	0.7	3	0.84	6	0.87	4
1	11073982	TARDBP	0.00188639	NA	NA	0.44	7	NA	NA	0.00045	1	NA	NA
19	6467544	DENND1C	0.00188939	2.1e-05	6	0.88	3	0.73	7	0.083	11	0.79	7
11	17323361	NUCB2	0.0019	NA	NA	NA	NA	NA	NA	0.0019	2	NA	NA
5	114961392	TMED7	0.0019	0.0019	2	NA	NA	NA	NA	NA	NA	NA	NA
12	122657198	IL31	0.0019178	NA	NA	0.0033	1	0.124	2	0.071	1	NA	NA
9	117791664	TNC	0.00193088	0.075	22	0.44	11	0.28	24	0.00017	38	0.58	22
9	99521386	ZNF510	0.00193977	0.000102	5	0.47	4	0.36	12	0.064	18	0.83	11
19	8651059	ADAMTS10	0.00194453	0.95	4	0.91	4	0.2	4	0.14	10	3.8e-05	4
21	19165833	C21orf91	0.00194766	NA	NA	NA	NA	0.57	1	0.00036	4	NA	NA
1	11561164	PTCHD2	0.00196162	0.29	4	0.00033	4	0.078	5	0.29	11	0.43	4
19	18266699	PIK3R2	0.0019682	0.44	2	0.88	2	0.5	3	7e-06	5	0.69	4
2	208993172	CRYGC	0.00197094	0.31	2	0.21	1	0.45	2	0.041	3	0.00078	2
11	57464253	ZDHHC5	0.00198239	0.0017	7	0.07	3	0.075	7	0.23	7	0.46	5
21	36081038	CLIC6	0.00198258	0.62	2	0.028	3	0.063	4	0.00157	6	0.55	3
20	29992741	DEFB121	0.002	NA	NA	NA	NA	NA	NA	0.002	2	NA	NA
10	124672351	FAM24A	0.002	NA	NA	NA	NA	NA	NA	0.002	1	NA	NA
14	69967603	PLEKHD1	0.00200536	0.034	5	0.61	2	0.41	2	0.0024	4	0.047	2
5	149677112	ARSI	0.00204151	0.36	3	0.52	2	0.3	9	2.5e-05	6	0.7	4
19	47646845	SAE1	0.00205274	0.98	5	0.029	2	NA	NA	0.00111	2	NA	NA
9	72879245	SMC5	0.002076	9.5e-05	6	0.72	1	0.3	5	1	8	0.049	5
19	58152510	ZNF211	0.00208321	4.6e-05	2	0.35	3	0.83	4	0.14	9	0.54	5
1	145293490	NBPF10	0.0021	NA	NA	0.0021	2	NA	NA	NA	NA	NA	NA
7	142417019	U66061.31	0.0021	NA	NA	0.0021	1	NA	NA	NA	NA	NA	NA
21	45649954	ICOSLG	0.00210058	0.029	4	NA	NA	NA	NA	0.0077	7	NA	NA
1	152006266	S100A11	0.00211582	NA	NA	0.035	1	0.11	1	0.0085	2	NA	NA
5	140011867	CD14	0.00213303	NA	NA	NA	NA	0.85	3	0.36	3	0.000108	2
14	76620980	C14orf118	0.00214424	NA	NA	3.8e-05	3	0.86	2	0.23	3	0.75	3
3	52721305	GNL3	0.00216017	0.00027	7	0.053	2	0.76	4	0.61	11	0.16	6
16	77756501	NUDT7	0.00218793	0.95	4	0.136	3	0.11	2	0.38	7	0.0002	5
20	43113099	TTPAL	0.0022	NA	NA	NA	NA	NA	NA	0.0022	3	NA	NA
16	57292435	PLLP	0.00221528	0.00014	2	NA	NA	0.7	2	0.15	4	0.4	1
12	55846538	OR6C2	0.00227775	0.92	4	0.23	2	0.56	4	0.9	6	1.07e-05	4
22	32330282	C22orf24	0.0023	NA	NA	NA	NA	NA	NA	0.0023	3	NA	NA
2	113479614	NT5DC4	0.0023	NA	NA	0.0023	3	NA	NA	NA	NA	NA	NA
8	145729727	GPT	0.0023145	0.87	10	0.72	8	0.14	8	0.00035	12	0.038	9
11	57480270	TMX2-CTNND1	0.00231854	NA	NA	0.043	1	NA	NA	0.0058	3	NA	NA
9	123156790	CDK5RAP2	0.00233714	0.021	8	0.082	5	0.24	9	0.22	18	0.013	9
8	19263328	CSGALNACT1	0.00233755	4.2e-05	12	0.46	3	0.14	6	0.47	14	0.93	4
18	25532304	CDH2	0.00235358	0.83	4	0.8	4	9.1e-06	3	0.25	7	0.79	4
3	142542449	PCOLCE2	0.00236416	0.0097	5	0.97	3	0.97	4	0.143	9	0.00092	4
19	2233855	PLEKHJ1	0.00236907	NA	NA	NA	NA	0.73	3	0.00035	6	NA	NA
15	65295441	MTFMT	0.00239804	0.88	5	0.33	3	0.34	5	0.0031	6	0.004	4
4	3129023	HTT	0.00240982	0.0016	12	0.53	15	0.17	14	0.45	22	0.019	16
12	54765349	ZNF385A	0.00245281	0.00022	2	0.95	1	0.6	3	0.53	2	0.019	1
1	103345315	COL11A1	0.00247049	0.82	11	0.018	8	0.024	11	0.12	16	0.03	10
14	21971569	METTL3	0.00248194	0.0022	1	NA	NA	0.74	2	0.0045	4	0.93	1
7	95750621	SLC25A13	0.00248761	0.51	5	0.82	3	NA	NA	3.8e-05	5	0.43	3
11	57177579	SLC43A3	0.00252804	0.25	1	NA	NA	NA	NA	0.00025	5	0.65	1
9	35842503	TMEM8B	0.00254364	5.6e-05	4	0.48	2	0.11	3	0.67	5	0.67	3
6	3273345	SLC22A23	0.00254422	0.98	2	0.97	1	0.79	2	0.00104	4	0.0017	3
2	219526649	BCS1L	0.00254606	1.8e-06	2	0.95	4	0.92	2	0.88	5	0.96	2
11	68475966	MTL5	0.00256819	0.11	4	0.57	2	0.65	6	0.0003	6	0.11	5
17	72916365	USH1G	0.00259565	0.2	1	0.58	2	0.69	5	0.55	5	3.1e-05	5
12	69651628	CPSF6	0.0026	0.0026	1	NA	NA	NA	NA	NA	NA	NA	NA
19	54802693	LILRA3	0.0026019	0.085	4	0.33	3	NA	NA	0.0015	3	NA	NA
7	99817752	PVRIG	0.00260418	0.13	2	0.18	1	NA	NA	0.0018	3	NA	NA
5	37293008	NUP155	0.00260565	0.9	6	NA	NA	0.28	5	3.6e-05	9	0.8	3
5	79616083	SPZ1	0.00266959	0.36	4	0.72	2	0.38	2	0.012	3	0.0012	2
17	2227572	TSR1	0.00267398	0.052	8	0.27	11	0.5	8	0.75	14	0.00027	5
4	155526029	FGG	0.00268299	0.28	6	0.069	3	0.11	4	0.021	8	0.032	6
5	140187322	PCDHA4	0.00274676	0.85	3	0.0037	6	0.67	4	0.5	8	0.0014	6
10	4872930	AKR1E2	0.00276594	0.19	7	NA	NA	NA	NA	0.0016	2	NA	NA
15	76191802	UBE2Q2	0.00277438	NA	NA	0.25	1	0.15	2	0.0005	2	0.42	1
16	56485625	OGFOD1	0.00278423	0.9	5	0.52	1	0.26	4	0.95	10	1.3e-05	4
12	93171826	EEA1	0.00278521	0.54	5	0.59	3	0.121	8	0.0001	12	0.39	10
7	150932235	CHPF2	0.00280638	0.97	9	0.19	7	0.92	11	0.00016	26	0.056	11
1	8073700	ERRFI1	0.00284506	0.4	3	0.005	1	0.97	3	0.42	7	0.0019	4
12	49308284	CCDC65	0.00285789	0.69	7	0.73	4	0.94	6	0.94	12	3.5e-06	3
1	246890251	SCCPDH	0.00286623	0.023	5	0.17	2	0.25	5	0.32	9	0.005	2
15	76452476	C15orf27	0.0028679	0.044	5	0.049	1	0.25	3	0.24	10	0.0121	4
1	153994647	NUP210L	0.00287391	0.17	5	0.27	5	0.15	11	0.0095	12	0.024	11
18	22020467	IMPACT	0.00287491	NA	NA	0.72	1	0.0044	2	0.015	5	NA	NA
7	72717986	NSUN5	0.00288044	NA	NA	0.18	3	0.31	3	0.039	2	0.0038	2
8	79578393	ZC2HC1A	0.00288777	0.032	3	0.00067	2	0.37	3	0.24	5	0.83	2
19	18234789	MAST3	0.00289871	0.58	5	0.52	2	0.99	3	0.7	7	7.6e-06	3
11	134226202	GLB1L2	0.00294511	1.8e-05	10	0.53	2	0.62	6	0.45	4	0.61	4
7	5232789	WIPI2	0.00295672	0.41	5	0.34	2	NA	NA	6.2e-05	6	0.99	4
17	4835895	GP1BA	0.00300689	0.0017	3	0.19	4	0.103	5	0.054	6	0.93	4
8	6783479	DEFA6	0.00301164	0.66	1	0.29	1	0.017	3	0.00083	3	0.62	2
2	68873071	PROKR1	0.00305157	0.48	4	NA	NA	0.18	4	0.043	5	0.0024	2
15	100269378	LYSMD4	0.00305666	0.062	5	0.013	4	0.31	6	0.57	12	0.012	6
16	86544651	FOXF1	0.00306821	0.56	1	NA	NA	NA	NA	0.00061	1	NA	NA
2	37319156	CCDC75	0.00306951	0.22	2	NA	NA	0.13	1	0.0018	3	NA	NA
5	137721931	KDM3B	0.00308177	0.94	3	0.11	3	0.53	4	0.083	11	0.00038	6
17	7534678	SHBG	0.00309873	NA	NA	NA	NA	0.0002	2	0.28	4	0.93	3
15	62939517	TLN2	0.00311152	0.17	24	0.18	7	0.015	16	0.053	36	0.072	18
15	67500933	AAGAB	0.00313045	0.12	2	0.047	4	0.55	2	0.0078	7	0.073	4
1	158368392	OR10T2	0.00318811	0.83	4	0.64	4	0.22	6	0.5	8	3.1e-05	7
2	160585568	2020-03-07	0.0032015	0.18	10	0.66	2	0.45	3	0.048	5	0.00071	3
21	47746375	PCNT	0.00325021	0.021	44	0.17	15	0.31	28	0.41	55	0.0041	30
12	83289885	TMTC2	0.00329147	0.8	4	0.058	6	0.00025	6	0.96	10	0.17	3
16	74657885	RFWD3	0.00330386	0.92	6	0.91	1	0.0084	1	0.00033	7	0.82	2
6	105726036	PREP	0.00333879	0.00019	2	0.18	2	0.65	4	0.101	6	0.86	4
16	57596332	GPR114	0.00333901	0.68	4	0.41	4	0.00078	3	0.012	6	0.74	4
15	49030795	CEP152	0.00339889	0.017	9	0.0077	8	0.12	7	0.42	22	0.3	6
17	76115463	TMC6	0.00344938	0.82	4	0.079	4	0.86	8	0.98	13	3.7e-05	10
2	113410374	SLC20A1	0.00345547	0.13	1	0.17	1	0.77	3	0.34	3	0.00035	2
6	135290440	HBS1L	0.00345588	0.46	7	0.56	6	0.00063	3	0.026	6	0.48	5
4	1719294	TMEM129	0.00346381	0.00044	2	NA	NA	NA	NA	0.89	4	NA	NA
10	71874784	AIFM2	0.00348204	0.16	4	0.94	3	0.14	7	0.0012	9	0.081	6
1	15953261	DDI2	0.0034889	0.0094	2	NA	NA	NA	NA	0.042	1	NA	NA
2	220146676	DNAJB2	0.0035	0.0035	3	NA	NA	NA	NA	NA	NA	NA	NA
19	8577545	ZNF414	0.00351911	0.47	1	0.0037	1	NA	NA	0.035	2	NA	NA
6	31583312	AIF1	0.00355308	0.31	1	NA	NA	NA	NA	0.0013	2	NA	NA
6	27860534	HIST1H3J	0.0036	NA	NA	0.0036	1	NA	NA	NA	NA	NA	NA
19	18679379	KXD1	0.00364962	0.051	1	NA	NA	0.52	1	0.0024	3	NA	NA
4	84015850	PLAC8	0.0037	NA	NA	NA	NA	NA	NA	0.0037	2	NA	NA
5	139946846	SLC35A4	0.0037211	0.61	2	0.14	2	0.24	3	0.00015	4	0.73	4
13	50235186	EBPL	0.00373929	NA	NA	0.25	2	0.00043	2	0.61	1	NA	NA
20	43353380	WISP2	0.00375549	NA	NA	0.066	1	NA	NA	0.0065	2	NA	NA
17	27896342	TP53I13	0.0037845	NA	NA	0.26	3	0.056	2	0.28	2	0.0029	2
3	10219541	IRAK2	0.0037864	0.18	13	0.95	2	0.83	7	0.9	12	1.8e-05	5
14	30046511	PRKD1	0.00379669	0.97	6	NA	NA	0.75	5	0.068	5	0.00024	1
2	128016886	ERCC3	0.00379847	0.2	4	0.00033	7	0.81	8	0.36	10	0.12	6
12	96266039	CCDC38	0.0037997	0.55	6	NA	NA	NA	NA	0.38	10	0.00032	2
6	30514529	GNL1	0.00380846	0.00031	2	0.52	4	0.43	5	0.038	7	0.88	4
19	11546269	PRKCSH	0.00383657	0.13	6	0.0002	7	0.92	5	0.11	9	0.89	3
14	66082793	FUT8	0.00384683	0.00076	2	NA	NA	NA	NA	NA	NA	0.58	1
9	117400861	C9orf91	0.00384908	0.0004	1	0.73	2	0.23	1	NA	NA	0.18	1
7	141635690	CLEC5A	0.00389083	0.47	1	NA	NA	NA	NA	0.00095	3	NA	NA
3	73433697	PDZRN3	0.00389219	0.23	1	0.24	2	0.67	7	0.00017	7	0.38	5
6	132636774	MOXD1	0.00392604	NA	NA	0.96	5	0.11	4	0.025	8	0.0047	2
17	7462960	TNFSF12-TNFSF13	0.00395341	0.0066	2	0.019	1	NA	NA	0.56	1	NA	NA
11	62763248	SLC22A8	0.00396003	NA	NA	0.99	3	0.86	3	0.67	6	2.2e-05	3
3	9854630	ARPC4-TTLL3	0.00396523	0.013	10	0.026	2	0.3	11	0.026	15	0.93	11
19	6002790	RFX2	0.00396566	0.34	8	0.73	5	0.13	8	0.0002	8	0.38	6
1	168066163	GPR161	0.00396877	NA	NA	0.8	2	0.63	3	0.00014	3	NA	NA
17	45360730	RP11-290H9.2	0.00398737	0.29	5	0.56	9	1.9e-05	5	0.91	7	0.88	3
16	30078860	ALDOA	0.00399619	0.00042	3	NA	NA	0.27	2	0.4	3	0.28	2
1	92495782	EPHX4	0.004	NA	NA	NA	NA	NA	NA	0.004	2	NA	NA
14	69341650	ACTN1	0.00403317	NA	NA	NA	NA	0.0005	3	0.93	2	NA	NA
17	74076015	ZACN	0.00405284	0.52	3	0.078	5	0.38	6	0.0004	14	0.41	6
3	42735150	HHATL	0.00405465	0.2	8	0.34	5	0.123	11	0.54	12	0.00056	10
12	7894056	CLEC4C	0.00409448	NA	NA	0.0086	2	NA	NA	0.055	2	NA	NA
8	37702012	BRF2	0.00412943	0.15	4	0.99	2	0.24	5	0.0056	6	0.013	5
9	107556682	ABCA1	0.00415077	0.0084	17	0.0033	37	0.74	18	0.26	28	0.49	11
17	65714095	NOL11	0.00419323	0.77	4	0.017	2	0.25	3	0.54	7	0.0015	4
19	2916111	ZNF57	0.00422514	0.025	8	0.02	3	0.123	2	0.044	7	0.99	4
1	234041421	SLC35F3	0.00425481	0.26	2	NA	NA	NA	NA	0.0019	3	NA	NA
5	148977507	ARHGEF37	0.0043051	0.0057	7	0.59	4	0.59	7	0.0022	12	0.63	7
12	13240162	GSG1	0.00430809	0.057	2	0.019	2	0.52	4	0.0104	9	0.47	6
6	17764793	KIF13A	0.00431849	0.5	7	0.61	6	0.13	11	0.081	21	0.00086	8
4	174219273	GALNT7	0.00436377	0.0034	3	0.034	4	0.58	5	0.22	4	0.19	4
6	138745256	NHSL1	0.00436827	0.11	11	0.0045	8	0.035	9	0.45	8	0.36	6
2	120194499	TMEM37	0.00439288	NA	NA	NA	NA	0.068	3	0.0012	4	0.98	2
7	66453476	SBDS	0.00440288	0.00065	2	0.79	10	NA	NA	NA	NA	NA	NA
9	32973642	APTX	0.00445554	0.99	2	0.72	2	0.46	4	0.00055	7	0.016	6
5	42700021	GHR	0.00449355	0.86	2	0.0043	9	0.94	5	0.0035	16	0.24	9
17	38319771	CASC3	0.0045201	0.0096	5	0.8	3	0.41	2	0.55	3	0.0017	2
11	25004730	LUZP2	0.00457136	0.12	4	NA	NA	NA	NA	0.5	3	0.0014	1
12	15134372	PDE6H	0.00457136	0.2	1	0.015	2	0.028	2	NA	NA	NA	NA
5	55247795	IL6ST	0.00457612	0.57	2	0.023	5	0.12	7	0.0068	9	0.28	6
18	44057658	LOXHD1	0.00460042	0.42	21	0.27	14	0.065	14	0.00046	18	0.89	10
16	28986603	SPNS1	0.00461163	NA	NA	0.79	4	0.74	3	3.5e-05	5	0.75	2
15	62147146	VPS13C	0.00461333	0.046	37	0.74	13	0.89	30	0.2	42	0.0005	19
5	76728974	WDR41	0.00464074	0.39	7	0.0066	6	0.3	7	0.46	11	0.0086	6
11	46765676	CKAP5	0.00466305	0.71	7	0.85	1	0.28	4	0.13	12	0.00014	7
10	87362068	GRID1	0.00466924	0.67	5	NA	NA	NA	NA	0.013	9	0.0099	4
14	94512255	OTUB2	0.00467378	0.98	1	0.00023	2	NA	NA	0.33	5	0.21	3
14	102815042	CINP	0.00468558	0.29	2	NA	NA	NA	NA	0.0019	5	NA	NA
9	116854689	KIF12	0.00476956	0.75	2	0.51	1	0.104	3	0.38	4	0.00021	3
12	1702470	FBXL14	0.00479212	NA	NA	0.073	3	0.00032	4	0.96	5	0.72	3
17	73106604	ARMC7	0.0048	NA	NA	NA	NA	NA	NA	0.0048	2	NA	NA
5	50685756	ISL1	0.0048	NA	NA	NA	NA	NA	NA	0.0048	2	NA	NA
6	29364508	OR12D2	0.0048015	0.027	3	0.019	5	0.091	6	0.104	6	0.66	4
5	143539969	YIPF5	0.0048146	NA	NA	0.59	2	0.46	3	0.00033	5	NA	NA
16	67697633	C16orf48	0.00486905	0.63	1	7.5e-05	3	0.76	4	0.26	6	0.35	3
12	108145285	PRDM4	0.00488371	0.23	1	0.00058	1	0.82	5	0.12	9	0.25	4
6	13305382	TBC1D7	0.00489481	0.12	8	0.71	3	0.46	5	0.14	7	0.0006	3
13	48881492	RB1	0.00491056	NA	NA	0.46	14	0.16	4	0.0103	6	0.022	3
10	72192816	NODAL	0.00495557	0.52	5	0.85	1	NA	NA	0.00021	2	NA	NA
11	114392694	NXPE1	0.00496559	0.16	6	0.3	3	0.32	6	0.27	12	0.00081	2
20	3672122	SIGLEC1	0.0049926	0.077	19	0.64	10	0.053	16	0.24	29	0.0054	12
17	64208285	APOH	0.00500661	0.33	5	NA	NA	NA	NA	0.0018	6	NA	NA
1	36931973	CSF3R	0.00501047	1	8	0.00025	8	0.54	11	0.12	11	0.21	9
5	162890919	HMMR	0.00506515	0.14	11	0.0003	3	0.17	4	0.59	9	0.82	2
17	37922259	IKZF3	0.00508607	0.003	5	0.87	2	0.052	1	0.064	4	0.4	2
21	33296950	HUNK	0.00508832	NA	NA	0.00012	6	0.5	3	0.47	8	0.62	6
15	65855179	PTPLAD1	0.00509473	0.54	1	1	2	0.95	4	7.3e-06	4	0.93	2
20	44166646	WFDC6	0.0051	NA	NA	NA	NA	NA	NA	0.0051	2	NA	NA
6	46623690	SLC25A27	0.00510883	0.51	3	0.18	1	NA	NA	0.00105	3	NA	NA
5	176759170	LMAN2	0.00511328	NA	NA	0.017	1	0.27	1	0.71	6	0.0054	2
17	45360730	ITGB3	0.00513885	0.29	5	0.66	11	2.3e-05	5	0.91	7	0.88	3
11	57367467	SERPING1	0.00514446	0.0028	1	0.16	2	0.055	2	0.72	4	NA	NA
12	51080364	DIP2B	0.00514853	0.0023	6	0.98	4	0.88	6	0.81	11	0.0022	4
2	11911750	LPIN1	0.00515793	0.88	7	0.035	4	0.036	8	0.068	10	0.047	5
8	134232908	WISP1	0.00518016	0.033	9	0.3	1	0.81	5	0.78	11	0.00057	6
1	27432204	SLC9A1	0.00518219	NA	NA	0.89	2	0.74	2	0.16	3	0.00017	2
1	155723008	GON4L	0.00518332	0.43	12	0.0092	4	0.041	6	0.2	14	0.11	5
15	91419098	FURIN	0.00519592	0.00023	9	0.052	9	0.99	8	0.42	9	0.72	5
19	1278847	AC004258.1	0.0052	0.0052	3	NA	NA	NA	NA	NA	NA	NA	NA
14	94931058	SERPINA9	0.0052084	0.66	6	0.00027	6	0.58	5	0.079	9	0.44	6
1	158045965	KIRREL	0.00522359	0.94	5	1	2	0.89	2	0.77	7	5.6e-06	4
22	39441434	APOBEC3F	0.00525588	0.76	3	0.02	4	0.95	1	0.012	4	0.021	2
8	6372298	ANGPT2	0.00527051	0.54	3	0.012	2	0.087	4	0.009	5	0.72	4
9	123673647	TRAF1	0.00527991	0.99	5	0.25	3	0.00014	3	0.53	5	NA	NA
19	21990464	ZNF43	0.0053	NA	NA	NA	NA	NA	NA	0.0053	4	NA	NA
9	95993170	WNK2	0.00530054	0.74	12	0.022	3	0.65	6	0.0012	9	0.29	4
19	46273846	DMPK	0.00530378	0.00111	4	0.86	2	0.033	7	0.39	7	0.3	5
3	111821747	C3orf52	0.00533763	0.86	2	0.13	3	0.66	6	0.084	9	0.0006	6
12	109510147	USP30	0.00538405	6.7e-05	1	0.58	4	0.13	4	0.81	5	0.92	2
5	61747557	IPO11	0.00539434	NA	NA	0.17	2	0.00067	2	0.79	3	0.21	5
5	172518171	CREBRF	0.0054	NA	NA	NA	NA	NA	NA	0.0054	2	NA	NA
21	35742799	KCNE2	0.00540537	NA	NA	0.0009	7	NA	NA	0.72	2	NA	NA
3	50338021	HYAL1	0.00541672	0.87	4	0.76	2	0.097	4	0.00016	6	0.37	4
8	22995702	TNFRSF10D	0.00546561	0.00136	6	0.0102	3	0.28	3	1	14	0.99	12
5	80724487	SSBP2	0.00549644	0.62	4	NA	NA	0.31	1	0.084	3	0.0012	1
13	50594532	KCNRG	0.00558775	0.0063	1	0.095	1	NA	NA	0.18	3	NA	NA
17	39657599	KRT13	0.00559207	0.000171	7	0.17	7	0.99	10	0.6	7	0.23	8
14	51712054	TMX1	0.0056	NA	NA	NA	NA	NA	NA	0.0056	3	NA	NA
8	124085043	WDR67	0.00566086	0.36	4	0.24	4	0.79	11	0.00037	17	0.16	5
9	116151901	ALAD	0.00569554	0.66	2	0.9	2	NA	NA	0.19	2	0.00018	2
15	71447239	THSD4	0.0058111	0.88	6	2.3e-05	7	0.76	7	0.29	21	0.94	7
7	102724261	ARMC10	0.00583403	0.53	2	0.5	3	0.0048	3	0.0085	4	0.39	4
17	39880966	HAP1	0.00590676	0.84	5	0.17	4	0.9	3	0.00053	7	0.063	5
17	56348106	MPO	0.00594528	0.62	3	0.49	6	0.11	6	0.00016	9	0.81	5
4	7776469	AFAP1	0.0059769	0.0002	4	0.37	4	0.63	8	0.39	13	0.24	2
20	56078504	CTCFL	0.0060135	0.078	4	0.19	2	0.0022	4	0.25	9	0.54	6
10	48413661	GDF2	0.0060421	0.00018	6	0.22	1	0.91	3	0.61	3	NA	NA
20	23669488	CST4	0.0061	NA	NA	NA	NA	NA	NA	0.0061	2	NA	NA
12	6604331	NCAPD2	0.00610678	0.068	12	0.93	8	0.076	8	0.0012	18	0.78	12
18	55319918	ATP8B1	0.0061217	0.000116	7	0.76	9	0.07	10	0.77	14	0.95	6
3	130095179	COL6A5	0.00612383	0.71	19	0.15	14	0.62	21	7.2e-05	36	0.95	24
17	46239844	SKAP1	0.00613561	0.49	2	NA	NA	NA	NA	0.13	3	0.0019	2
12	104174131	NT5DC3	0.00618497	1	3	0.3	1	0.87	1	0.65	1	2.7e-05	1
1	185267193	IVNS1ABP	0.00620671	NA	NA	0.043	2	0.00072	3	0.92	7	0.8	4
7	140035196	SLC37A3	0.0062772	0.45	4	0.34	4	0.00084	3	0.18	10	NA	NA
20	62705874	RGS19	0.00631265	NA	NA	0.006	2	NA	NA	0.19	1	0.11	1
15	91136869	CRTC3	0.00637446	0.00019	4	0.052	2	0.66	4	0.94	10	0.78	3
8	144808923	FAM83H	0.00640696	0.35	6	0.014	4	0.024	5	0.045	9	0.91	3
12	50232169	BCDIN3D	0.00640837	0.0022	2	0.86	5	0.41	3	0.27	6	0.023	5
12	6341823	CD9	0.00641456	NA	NA	0.98	3	0.3	3	0.00018	5	0.45	1
7	940181	ADAP1	0.00643389	NA	NA	0.00029	1	NA	NA	0.82	3	0.54	2
16	67429390	ZDHHC1	0.00644726	0.0013	3	NA	NA	0.69	3	0.027	3	0.99	2
2	113074804	ZC3H6	0.00645848	0.00021	2	0.47	1	0.35	3	0.94	5	0.15	2
1	150482145	ECM1	0.00646524	0.89	4	0.12	2	0.029	1	0.0021	8	0.75	3
12	81112735	MYF5	0.00649234	0.27	1	0.37	1	NA	NA	0.0013	3	NA	NA
8	107773278	ABRA	0.00665968	0.57	7	NA	NA	0.00028	3	0.84	3	NA	NA
10	118424362	C10orf82	0.0067175	0.22	4	0.28	1	NA	NA	0.0022	4	NA	NA
1	43803863	MPL	0.00677177	0.79	4	0.77	5	0.86	5	1.2e-05	9	0.83	8
15	90610517	ZNF710	0.00678362	0.057	5	0.23	5	0.22	1	0.0089	4	NA	NA
8	43002177	HGSNAT	0.00681589	0.22	5	0.0016	8	0.018	3	1	9	0.83	3
6	90604777	GJA10	0.00683147	0.46	2	0.059	1	0.024	5	0.15	12	0.054	7
14	70839847	SYNJ2BP	0.0068668	NA	NA	0.37	1	NA	NA	0.0023	3	NA	NA
20	60348084	CDH4	0.00699349	0.035	9	0.0036	6	0.88	13	0.082	12	0.6	9
6	28358680	ZSCAN12	0.00700677	0.1	2	0.14	6	0.0033	1	0.32	1	0.37	1
13	101707799	NALCN	0.00700768	0.42	4	0.11	6	0.86	4	0.27	6	0.00051	4
3	183209738	KLHL6	0.00707029	0.0002	5	NA	NA	0.86	4	0.84	8	NA	NA
14	100803423	WARS	0.00709893	1	3	0.093	2	0.47	4	0.00015	4	0.85	3
2	125204345	CNTNAP5	0.00713697	0.12	10	0.74	4	0.051	10	0.31	14	0.004	7
15	78466127	ACSBG1	0.00717319	0.046	5	0.47	4	0.51	4	0.019	9	0.027	4
7	44714134	OGDH	0.00720042	0.91	3	0.014	3	0.04	7	0.62	6	0.018	3
12	95478353	FGD6	0.00720374	0.8	8	0.15	6	0.48	8	0.00019	16	0.52	11
10	114925369	TCF7L2	0.0072118	0.36	2	NA	NA	NA	NA	0.0025	5	NA	NA
7	75511221	RHBDD2	0.0072555	0.0015	3	0.91	1	0.52	2	0.18	4	0.045	3
11	46700940	ARHGAP1	0.00728284	0.98	2	NA	NA	0.00018	2	0.85	4	NA	NA
10	67680276	CTNNA3	0.00731471	0.67	13	0.53	5	0.52	9	0.75	13	4.2e-05	9
11	71906361	FOLR1	0.00734442	0.89	2	1.5e-05	2	0.63	2	0.94	1	0.74	1
7	101928495	SH2B2	0.0073798	NA	NA	NA	NA	0.0042	3	0.22	2	NA	NA
20	60714788	PSMA7	0.0074	0.0074	1	NA	NA	NA	NA	NA	NA	NA	NA
1	156437916	MEF2D	0.00740952	0.064	2	0.00079	2	0.93	3	0.7	3	0.18	2
17	73695940	SAP30BP	0.00742434	NA	NA	0.16	1	0.012	2	0.08	5	NA	NA
3	49215451	RP11-694I15.6	0.0074307	0.85	2	NA	NA	0.0067	1	0.027	1	NA	NA
15	75932172	IMP3	0.00746937	0.62	2	0.19	1	0.0023	2	0.158	2	0.14	1
12	102141003	GNPTAB	0.00750731	0.077	6	0.16	4	0.14	7	0.014	8	0.25	5
2	119603999	EN1	0.0076	0.0076	1	NA	NA	NA	NA	NA	NA	NA	NA
2	99170912	INPP4A	0.00764537	NA	NA	0.41	3	0.73	4	0.000146	7	0.69	2
2	211302508	LANCL1	0.00769036	0.11	7	0.51	4	0.034	3	0.052	8	0.063	4
6	32013975	TNXB	0.00772873	0.56	11	0.38	23	0.62	23	0.00045	27	0.106	24
3	148545841	CPB1	0.0077362	0.023	8	0.71	6	0.67	8	0.0006	11	0.96	9
11	73712464	UCP3	0.00776308	0.48	4	3.6e-05	4	0.49	3	0.88	7	0.85	4
17	3343611	SPATA22	0.0077694	0.028	4	NA	NA	NA	NA	0.035	5	NA	NA
19	12800595	FBXW9	0.00782665	0.073	5	0.75	2	0.076	2	0.0035	5	0.44	1
14	25043671	CTSG	0.00783863	NA	NA	NA	NA	0.045	1	0.022	3	NA	NA
13	103418924	TEX30	0.00785246	0.0031	2	NA	NA	NA	NA	0.32	3	NA	NA
1	246707842	TFB2M	0.00793933	0.27	4	0.016	3	0.22	4	0.0074	7	0.93	4
6	83074734	TPBG	0.00795661	NA	NA	0.0029	3	0.095	2	0.15	2	0.77	3
12	121002888	RNF10	0.00798189	0.38	1	0.073	4	0.18	5	0.8	10	0.00165	3
1	156213701	PAQR6	0.00798488	0.016	5	0.02	1	0.046	1	0.56	6	0.8	3
6	50807934	TFAP2B	0.00798785	0.6	2	0.32	1	0.15	1	0.029	3	0.0079	1
13	106119492	DAOA	0.008	NA	NA	NA	NA	NA	NA	0.008	2	NA	NA
9	36589555	MELK	0.00804566	0.95	5	0.043	6	0.15	5	0.068	9	0.016	5
9	107331464	OR13C8	0.00806959	NA	NA	0.11	2	0.91	3	0.18	9	0.0018	2
9	132481549	PRRX2	0.00808702	0.54	4	NA	NA	NA	NA	0.0019	3	NA	NA
10	104248008	ACTR1A	0.0081	0.0081	2	NA	NA	NA	NA	NA	NA	NA	NA
15	36936489	C15orf41	0.00813198	0.0041	2	0.12	1	NA	NA	0.35	2	NA	NA
2	162061198	TANK	0.00814678	0.00131	6	0.68	3	0.054	6	0.17	8	0.83	6
15	76017452	ODF3L1	0.00819783	NA	NA	0.41	3	0.26	5	0.0037	7	0.084	3
18	55143924	ONECUT2	0.0082534	0.00043	1	0.48	2	NA	NA	0.85	1	NA	NA
8	53030923	ST18	0.00825861	0.049	12	0.083	5	0.61	8	0.003	15	0.93	7
11	57480232	TMX2	0.00827751	0.43	3	0.039	1	NA	NA	0.0105	4	NA	NA
20	139456	DEFB127	0.00827934	NA	NA	NA	NA	0.62	2	0.0017	2	NA	NA
12	121660756	P2RX4	0.00828805	0.56	2	0.47	4	0.037	2	0.0038	3	0.188	2
11	130750592	SNX19	0.0082947	0.43	6	0.1	5	0.14	5	0.0013	7	0.89	2
12	109826540	MYO1H	0.00831157	0.00015	10	0.38	6	0.17	8	0.89	12	0.81	7
9	36169539	CCIN	0.00839288	0.023	10	0.14	2	0.02	4	0.11	9	1	3
1	145415273	HFE2	0.00840669	NA	NA	0.57	9	0.21	1	0.0015	3	NA	NA
17	4675378	TM4SF5	0.00848135	0.85	2	0.89	2	NA	NA	0.00024	4	NA	NA
17	7462960	TNFSF12	0.0084956	0.0057	2	0.057	2	NA	NA	0.56	1	NA	NA
17	55027115	COIL	0.00858387	0.021	3	0.029	3	0.054	3	0.25	6	0.89	2
17	26976071	SDF2	0.00863455	NA	NA	0.079	1	NA	NA	0.014	1	NA	NA
2	61420088	USP34	0.00863689	0.29	9	0.19	6	0.87	16	0.028	21	0.0055	9
18	61565055	SERPINB2	0.00873186	0.32	6	0.24	3	0.31	7	0.015	9	0.021	6
22	23955511	C22orf43	0.00874334	0.2	3	0.95	2	0.39	2	0.0026	4	0.039	3
10	99190891	PGAM1	0.00874334	0.033	1	NA	NA	NA	NA	0.034	1	NA	NA
10	88911841	FAM35A	0.0088	0.0088	2	NA	NA	NA	NA	NA	NA	NA	NA
14	69791444	GALNTL1	0.00887796	0.091	4	0.49	5	0.27	5	0.11	10	0.0058	6
1	32193049	BAI2	0.00892925	0.44	4	0.0059	4	0.45	10	0.13	11	0.051	9
10	75406617	SYNPO2L	0.00893632	0.0002	3	0.59	3	0.24	4	0.37	7	0.74	3
1	160969444	F11R	0.00894126	0.021	3	0.047	1	0.27	4	0.032	8	0.91	3
12	122091018	MORN3	0.00905157	0.071	4	0.43	1	0.88	3	0.21	6	0.0014	3
16	30793621	ZNF629	0.00910397	NA	NA	0.0128	4	0.96	3	0.0037	5	0.84	4
17	15611546	AC005324.8-001	0.00917966	NA	NA	0.66	1	0.76	3	0.035	4	0.0022	2
17	8644854	CCDC42	0.00918279	0.29	3	0.094	3	0.0043	4	0.43	11	0.16	2
5	149495360	PDGFRB	0.00919257	0.38	15	0.22	7	0.95	9	0.000113	15	0.9	7
19	9490265	ZNF177	0.00920832	0.92	1	0.62	1	0.17	3	0.0004	8	NA	NA
5	63496642	RNF180	0.009304	0.0014	7	0.89	2	0.59	4	0.43	6	0.026	4
3	39373902	CCR8	0.00932796	0.0032	2	0.031	2	0.36	3	0.3	3	0.77	2
21	45557079	AP001055.7	0.00933102	0.093	3	NA	NA	NA	NA	0.013	3	NA	NA
12	66546100	TMBIM4	0.00934915	NA	NA	0.74	2	0.49	4	0.039	5	0.0028	3
1	31769528	SNRNP40	0.00945802	NA	NA	0.31	1	0.0016	1	0.42	2	NA	NA
3	10074592	FANCD2	0.0095316	0.53	9	0.016	5	0.34	9	0.036	14	0.082	7
12	105150997	CHST11	0.00954713	0.0005	2	0.41	1	0.51	3	0.68	3	0.12	2
2	230902140	SLC16A14	0.00957233	0.0015	3	NA	NA	NA	NA	0.83	3	NA	NA
7	151791576	GALNT11	0.00958069	0.44	6	0.004	4	0.15	8	0.056	14	0.58	9
11	55904382	OR8J3	0.00958545	0.77	4	NA	NA	0.4	2	0.00014	4	0.95	2
7	123296159	LMOD2	0.00961504	0.00045	3	0.58	2	0.08	4	0.48	6	0.86	4
2	242035466	MTERFD2	0.00968284	0.37	5	0.2	1	NA	NA	0.0029	5	NA	NA
19	41223347	ITPKC	0.00971485	0.99	6	0.25	1	0.0014	3	0.101	7	0.25	3
1	43212680	LEPRE1	0.00974493	0.92	9	0.61	6	0.58	8	0.0018	9	0.015	5
17	68128241	KCNJ16	0.00975697	0.92	9	0.62	4	0.21	6	0.98	8	7.5e-05	2
15	40462771	BUB1B	0.00981087	0.0009	4	0.12	8	0.43	10	0.39	12	0.49	7
17	57208700	SKA2	0.00981212	0.79	1	0.16	1	0.22	1	0.00038	2	0.84	1
19	48715205	CARD8	0.00983662	0.15	10	0.58	8	0.92	9	0.053	11	0.0021	10
13	113030772	SPACA7	0.009838	0.68	2	0.23	2	NA	NA	0.0014	6	NA	NA
11	65651040	CTSW	0.00986246	0.36	1	0.48	2	0.69	4	0.00015	10	0.5	6
14	52171526	FRMD6	0.00987974	0.34	4	NA	NA	0.0062	3	0.45	9	0.045	5
10	50947825	OGDHL	0.00990568	0.85	6	0.12	7	0.92	7	0.000137	12	0.7	6
6	29454676	MAS1L	0.00992189	0.37	2	0.019	7	0.051	7	0.68	13	0.037	7
17	80788899	ZNF750	0.00992239	0.19	9	0.18	2	0.0109	6	0.11	9	0.22	3
20	62339942	ZGPAT	0.00993935	0.27	5	0.7	4	0.058	3	0.33	9	0.0025	5
11	89947246	CHORDC1	0.01	NA	NA	NA	NA	NA	NA	0.01	1	NA	NA
19	56223314	NLRP9	0.0100331	0.0072	9	0.83	3	0.0032	8	0.51	12	0.94	10
2	44457558	PPM1B	0.0101049	NA	NA	0.53	1	NA	NA	0.0025	4	NA	NA
19	8555109	PRAM1	0.0101388	0.82	6	0.13	5	0.77	5	0.42	11	0.00027	7
1	27648878	TMEM222	0.0101423	0.86	3	0.96	4	0.2	4	0.047	5	0.0012	2
1	113616048	LRIG2	0.0101561	0.8	7	0.012	3	0.27	6	0.3	14	0.012	6
12	7280874	RBP5	0.0102307	0.32	2	NA	NA	0.0042	1	NA	NA	NA	NA
9	135285840	C9orf171	0.0102364	0.68	6	0.18	3	0.42	5	0.0108	7	0.017	3
14	20710981	OR11H4	0.010244	0.33	2	0.38	5	0.063	5	0.052	10	0.023	8
20	57597954	TUBB1	0.010307	0.18	5	0.13	4	0.3	6	0.0014	11	0.97	2
2	75891827	GCFC2	0.0103181	0.33	9	0.044	5	0.77	6	0.014	11	0.061	8
17	15611546	ZNF286A	0.0103185	NA	NA	0.66	1	0.76	3	0.043	4	0.0021	2
22	20800848	KLHL22	0.0103314	NA	NA	0.13	1	0.64	1	0.0028	2	NA	NA
22	45810273	RIBC2	0.0103369	0.0023	3	0.9	3	0.82	5	0.47	6	0.012	4
3	49149169	USP19	0.0104014	0.78	5	0.00032	6	0.057	10	0.97	16	0.7	6
19	19625992	TSSK6	0.0104155	NA	NA	NA	NA	0.14	1	0.0098	1	NA	NA
12	14766058	GUCY2C	0.010431	0.0003	8	0.63	7	0.84	5	0.13	12	0.47	7
15	52427943	GNB5	0.0104342	NA	NA	1	2	0.9	3	0.7	4	7.3e-05	2
9	125281780	OR1J4	0.0104358	0.13	3	NA	NA	0.55	1	0.0033	4	NA	NA
3	50616353	HEMK1	0.0104568	0.112	3	0.024	1	0.033	3	0.52	6	NA	NA
1	209961910	IRF6	0.0104682	0.3	1	NA	NA	NA	NA	0.0046	2	NA	NA
15	32935919	SCG5	0.0104682	0.042	3	NA	NA	0.12	3	0.047	5	NA	NA
20	1099523	PSMF1	0.0104714	0.066	5	0.66	3	0.43	4	0.00056	6	0.93	3
14	77697969	TMEM63C	0.0104738	0.0012	4	0.69	7	0.061	4	0.23	6	0.84	5
19	54722250	LILRB3	0.0105	NA	NA	0.0105	1	NA	NA	NA	NA	NA	NA
9	127215772	GPR144	0.0105945	1	9	0.054	8	0.029	10	0.0072	17	0.88	13
12	80014927	PAWR	0.0106261	1	2	NA	NA	0.25	2	0.00023	3	0.82	2
13	20978318	CRYL1	0.0106843	0.017	2	NA	NA	0.13	2	0.11	5	NA	NA
5	14602358	FAM105A	0.010744	0.84	4	0.0027	3	0.19	4	0.047	4	0.5	5
9	131585069	C9orf114	0.0107729	0.096	2	0.51	2	0.046	2	0.0074	3	0.61	3
16	8953028	CARHSP1	0.0107736	NA	NA	0.21	1	0.22	4	0.8	5	0.0013	2
3	46062776	XCR1	0.0107835	0.017	2	NA	NA	NA	NA	0.084	2	NA	NA
16	57794989	KIFC3	0.0108064	0.35	2	0.21	2	0.83	5	0.018	6	0.0093	5
2	88472791	THNSL2	0.0109005	0.27	11	0.4	3	0.57	4	0.14	12	0.0012	5
9	5549568	PDCD1LG2	0.0109438	0.91	1	0.012	1	0.084	1	0.42	4	0.027	1
8	104412688	SLC25A32	0.010989	0.0004	3	NA	NA	0.55	4	0.33	7	0.68	2
1	90152055	LRRC8C	0.0111041	0.88	7	0.008	2	0.56	4	0.35	7	0.0077	3
5	89918426	GPR98	0.0111082	0.063	45	0.24	32	0.042	56	0.031	101	0.54	54
10	50530621	C10orf71	0.011131	8e-05	5	0.35	6	0.56	12	0.68	22	1	11
14	58055947	SLC35F4	0.0112274	0.68	4	NA	NA	NA	NA	0.0022	3	NA	NA
19	856015	ELANE	0.0112812	0.81	2	0.54	2	0.0003	1	NA	NA	0.39	1
3	47277065	KIF9	0.0113266	0.028	9	0.015	5	0.35	6	0.31	19	0.24	4
1	161042657	PVRL4	0.0113404	0.31	6	0.99	2	0.05	8	0.0051	9	0.14	5
3	100100549	TOMM70A	0.0113673	0.16	1	0.47	2	0.0005	2	0.43	3	0.68	2
22	41075523	MCHR1	0.0113937	0.024	8	0.14	4	0.08	11	0.076	11	0.54	7
1	85405361	MCOLN2	0.0114217	0.67	2	0.00034	3	0.3	2	0.18	9	0.9	2
1	213303178	RPS6KC1	0.0114397	0.03	5	0.43	4	0.23	8	0.11	17	0.034	8
17	27910045	GIT1	0.0114871	0.0016	3	NA	NA	NA	NA	0.96	2	NA	NA
5	1318491	CLPTM1L	0.0116619	0.75	6	0.00032	4	0.62	5	0.13	9	0.59	5
17	60469284	EFCAB3	0.0116839	0.33	2	0.34	1	0.12	1	0.0017	3	0.5	3
4	4242132	TMEM128	0.0117071	NA	NA	0.0045	1	0.082	3	0.74	3	NA	NA
19	14522323	DDX39A	0.0117131	0.92	2	NA	NA	0.11	2	0.0027	3	NA	NA
2	136598443	MCM6	0.0117256	0.43	5	0.049	5	0.025	7	0.024	10	0.91	6
11	4944728	OR51G1	0.0117446	0.105	8	0.48	6	0.8	8	0.0026	9	0.11	9
16	28603710	SULT1A2	0.0118	0.0118	2	NA	NA	NA	NA	NA	NA	NA	NA
4	119649805	SEC24D	0.0118253	0.0012	3	0.8	3	0.61	6	0.051	10	0.39	5
7	75864433	SRRM3	0.0118968	0.0065	2	0.39	2	0.43	2	0.22	2	0.049	2
1	12907457	HNRNPCL1	0.012	NA	NA	0.012	3	NA	NA	NA	NA	NA	NA
12	12509865	LOH12CR2	0.012	NA	NA	0.012	1	NA	NA	NA	NA	NA	NA
3	142769891	U2SURP	0.012	NA	NA	0.012	1	NA	NA	NA	NA	NA	NA
11	104899901	CASP1	0.0120343	0.021	3	0.64	5	0.021	7	0.058	8	0.73	4
9	136337168	SLC2A6	0.0120359	0.68	7	0.00031	2	0.9	3	1	5	0.063	2
19	3531959	FZR1	0.0121129	NA	NA	NA	NA	0.21	1	0.097	4	0.014	1
7	134678307	AGBL3	0.0121181	0.56	8	0.95	7	0.31	6	0.0061	9	0.012	7
1	111889607	C1orf88	0.0121446	0.0042	3	NA	NA	NA	NA	0.39	2	NA	NA
11	55999664	OR5T2	0.0121632	0.17	5	0.14	1	0.012	1	0.25	2	0.17	1
9	15422944	SNAPC3	0.0121665	0.65	5	0.0045	3	0.66	2	0.074	4	0.085	3
1	19208193	RP13-279N23.2	0.0121736	NA	NA	0.24	2	0.89	1	0.00038	2	0.7	2
7	108213556	DNAJB9	0.0121819	0.6	2	NA	NA	0.093	3	0.00104	4	0.98	4
9	37692654	FRMPD1	0.0122968	0.14	16	0.69	6	0.84	11	0.8	31	0.00019	15
13	48571013	SUCLA2	0.0123472	NA	NA	0.71	1	0.34	4	0.16	5	0.0015	5
20	42965841	R3HDML	0.0123516	0.99	3	0.8	3	0.25	4	0.00033	5	0.19	3
7	157160173	DNAJB6	0.0123925	0.77	1	NA	NA	0.41	1	0.00093	3	NA	NA
10	91198917	SLC16A12	0.0123977	NA	NA	0.0016	1	0.54	3	0.34	6	NA	NA
5	133534797	PPP2CA	0.0124135	0.028	2	NA	NA	NA	NA	0.06	1	NA	NA
20	19941396	RIN2	0.01242	0.012	3	0.074	8	0.81	6	0.116	7	0.15	5
11	73687973	UCP2	0.0124699	0.157	1	0.0065	4	NA	NA	0.29	5	NA	NA
6	33254665	WDR46	0.0125323	0.88	3	NA	NA	0.8	3	0.006	3	0.014	2
19	16612105	C19orf44	0.0125577	0.98	6	0.12	5	0.13	6	0.32	8	0.0026	6
22	37966314	LGALS2	0.0125605	0.13	1	0.013	1	NA	NA	0.27	6	0.13	2
2	1637992	PXDN	0.0125608	0.021	8	0.28	5	0.91	7	0.0041	13	0.58	7
4	5570315	EVC2	0.0126015	0.0012	19	0.36	12	0.66	13	0.76	23	0.059	13
17	7761512	CYB5D1	0.0126142	0.73	1	0.84	2	0.00012	2	0.29	4	0.6	2
6	116265504	FRK	0.0126283	0.0043	3	0.12	1	0.086	3	0.34	8	0.85	3
5	140792894	PCDHGA10	0.0126898	0.77	6	0.62	4	0.16	6	0.089	8	0.0019	4
1	15287201	KAZN	0.01269	0.14	8	0.4	5	0.064	7	0.0053	8	0.68	7
14	24610441	EMC9	0.0127383	0.009	1	0.048	2	0.14	2	1	3	NA	NA
2	70082038	GMCL1	0.0128227	0.17	3	NA	NA	0.041	1	0.044	1	NA	NA
6	39824130	DAAM2	0.0128575	0.0064	5	0.27	9	0.91	21	0.079	20	0.106	14
5	179264564	C5orf45	0.0128605	0.84	3	0.18	4	0.12	4	0.0022	5	0.33	3
8	73849154	KCNB2	0.0129863	0.83	2	0.26	1	0.004	2	0.043	3	0.36	3
9	3225104	RFX3	0.0129962	NA	NA	0.076	3	0.054	2	0.15	3	0.101	1
13	107211797	ARGLU1	0.013	NA	NA	NA	NA	NA	NA	0.013	1	NA	NA
10	104210861	C10orf95	0.013	NA	NA	NA	NA	NA	NA	0.013	1	NA	NA
6	153323570	MTRF1L	0.013	NA	NA	NA	NA	0.013	1	NA	NA	NA	NA
5	158585811	RNF145	0.013	0.013	4	NA	NA	NA	NA	NA	NA	NA	NA
15	42805628	SNAP23	0.013	0.013	1	NA	NA	NA	NA	NA	NA	NA	NA
17	1370828	MYO1C	0.01308	0.16	8	0.58	10	0.57	11	0.069	18	0.0037	9
15	50833350	USP50	0.01308	NA	NA	0.0017	3	0.25	2	0.18	8	0.82	3
17	3343611	RP11-147K16.2	0.0130874	0.038	4	NA	NA	NA	NA	0.047	5	NA	NA
17	48646274	CACNA1G	0.0131084	0.48	10	0.014	6	0.63	6	0.0032	12	1	7
16	58052912	USB1	0.0131486	0.058	2	0.084	1	NA	NA	0.065	5	NA	NA
22	32802742	C22orf28	0.0132066	0.0049	1	0.31	2	NA	NA	0.045	5	0.93	2
11	67401660	TBX10	0.0132607	0.23	2	0.0117	2	0.13	3	0.39	3	0.101	3
18	55711905	NEDD4L	0.0133151	0.00013	2	0.88	2	0.2	4	0.73	6	0.83	3
1	2106723	PRKCZ	0.0134331	NA	NA	0.89	1	0.69	2	0.00053	1	NA	NA
17	60501370	METTL2A	0.0134939	0.62	1	NA	NA	0.012	3	0.044	5	NA	NA
19	4891239	ARRDC5	0.0134956	0.00035	5	0.77	3	0.66	4	0.53	6	0.15	4
1	203740057	LAX1	0.0136281	0.88	6	0.22	2	0.75	5	0.52	9	0.00019	5
11	5878358	OR52E8	0.0136495	0.079	7	0.0067	2	0.17	3	0.34	4	0.47	2
22	30886156	SEC14L4	0.0136521	0.61	6	0.74	4	0.57	4	0.43	8	0.00013	2
6	49700930	CRISP3	0.0136786	0.97	6	0.63	1	0.00012	2	0.91	3	NA	NA
2	20453591	PUM2	0.0137032	0.86	1	0.11	2	0.0002	4	0.91	5	0.84	3
16	31102557	VKORC1	0.0137712	0.35	2	0.004	3	NA	NA	0.24	1	NA	NA
5	131714091	SLC22A5	0.0138753	0.57	7	0.91	10	0.71	6	0.0016	9	0.025	7
18	77170477	NFATC1	0.0139105	0.28	13	0.082	8	0.0023	9	0.28	14	1	8
11	60636633	ZP1	0.0139399	0.57	9	0.00018	2	0.82	5	0.41	10	0.43	5
9	89763758	C9orf170	0.014	0.014	2	NA	NA	NA	NA	NA	NA	NA	NA
4	106639176	GSTCD	0.0140028	0.57	2	0.27	3	0.49	1	0.00022	5	0.9	1
11	113650896	CLDN25	0.0140304	0.44	1	NA	NA	NA	NA	0.0044	4	NA	NA
3	186915414	RTP1	0.0141653	0.83	4	0.017	2	0.13	3	0.23	4	0.036	3
9	33259029	BAG1	0.0141802	0.56	2	NA	NA	NA	NA	0.0035	3	NA	NA
7	138732434	ZC3HAV1	0.0142598	0.19	5	0.93	3	0.69	4	0.0034	8	0.037	6
13	73336100	DIS3	0.0142641	0.12	10	0.24	4	0.45	6	0.0016	18	0.74	6
19	6422423	KHSRP	0.01427	0.0012	1	NA	NA	0.28	1	0.54	1	0.39	2
18	23854774	TAF4B	0.0143762	0.7	4	0.24	1	1	3	0.022	10	0.0042	6
19	7734204	RETN	0.014444	0.83	1	NA	NA	0.3	1	0.00034	2	0.85	2
2	184016281	NUP35	0.0144783	0.0013	2	NA	NA	0.074	1	0.79	3	0.95	2
12	55945258	OR6C4	0.0145141	0.41	2	0.00032	4	1	5	0.24	11	0.5	6
17	40010070	KLHL11	0.0145297	NA	NA	0.0013	2	0.67	1	0.17	3	0.49	2
21	47404290	COL6A1	0.0147809	0.18	13	0.4	7	0.27	11	0.16	17	0.0052	9
4	85525421	CDS1	0.0148179	0.36	2	0.084	4	0.132	6	0.0049	7	0.83	4
17	36991482	C17orf98	0.0148408	0.0051	2	0.74	1	NA	NA	0.098	2	NA	NA
9	139571430	AGPAT2	0.0148706	0.53	3	NA	NA	0.087	1	0.0025	3	0.65	1
13	50080847	PHF11	0.0149865	0.019	3	NA	NA	NA	NA	0.11	3	NA	NA
20	32856839	ASIP	0.015	0.015	1	NA	NA	NA	NA	NA	NA	NA	NA
15	78880752	CHRNA5	0.015028	0.78	4	NA	NA	0.47	5	0.122	8	0.0017	4
12	122326793	PSMD9	0.0150554	0.76	2	0.025	4	0.54	4	0.0018	6	0.9	6
12	12278346	LRP6	0.015062	0.15	5	0.028	2	0.55	8	0.015	16	0.48	5
3	3170697	TRNT1	0.0150903	NA	NA	0.18	3	0.0038	6	0.13	6	0.86	3
19	45532195	RELB	0.0150935	0.002	3	NA	NA	0.61	3	0.33	3	0.19	1
3	128344820	RPN1	0.0151147	0.016	3	0.46	2	0.007	5	0.59	5	0.55	5
16	67228590	E2F4	0.0152248	NA	NA	0.7	1	0.13	2	0.0042	2	NA	NA
12	234929	IQSEC3	0.0152361	0.23	5	0.0054	3	0.39	3	0.16	3	NA	NA
2	55054839	EML6	0.0152403	0.12	8	0.99	6	0.64	13	0.00053	15	0.42	12
5	145465086	PLAC8L1	0.0153741	0.21	2	NA	NA	0.97	2	0.0019	3	NA	NA
11	102195289	BIRC3	0.0153747	0.86	4	0.78	2	NA	NA	0.00065	3	0.18	2
10	75888896	AP3M1	0.0153872	0.37	1	0.0075	2	0.76	2	0.022	3	0.37	3
1	223900410	CAPN2	0.0154365	0.138	11	0.7	3	0.62	10	0.0018	9	0.16	8
10	83635785	NRG3	0.0154428	0.74	3	0.73	4	0.71	5	0.3	7	0.00015	3
12	95645827	VEZT	0.0154752	0.86	5	0.083	4	0.99	7	0.35	10	0.0007	7
9	140323373	NOXA1	0.0155005	0.27	2	0.055	5	0.31	3	0.029	7	0.13	4
5	74376396	ANKRD31	0.0155787	0.58	13	0.057	2	0.043	7	0.3	12	0.041	6
7	142836203	PIP	0.0156236	0.46	2	0.74	1	0.49	3	0.000112	4	0.94	3
16	2215883	TRAF7	0.015638	0.122	3	NA	NA	NA	NA	0.018	4	NA	NA
16	49430390	C16orf78	0.0156502	0.0033	2	1	3	NA	NA	0.12	4	NA	NA
9	108424814	TAL2	0.0156625	0.88	3	NA	NA	NA	NA	0.0025	3	NA	NA
17	41367905	TMEM106A	0.0156627	0.88	2	0.000104	2	NA	NA	0.88	4	1	2
5	153372609	FAM114A2	0.0156943	0.23	6	NA	NA	NA	NA	0.0024	3	0.72	1
2	99938565	TXNDC9	0.0158711	NA	NA	0.29	2	0.068	2	0.016	2	0.26	2
17	4337267	SPNS3	0.0158965	1	3	0.018	5	0.55	15	0.91	20	0.002	12
18	44030346	RNF165	0.016	0.016	2	NA	NA	NA	NA	NA	NA	NA	NA
11	70319250	SHANK2	0.0160055	0.089	13	0.055	7	0.037	11	0.15	27	0.67	13
4	57164405	KIAA1211	0.0161551	0.093	6	0.5	5	0.54	8	0.0015	14	0.49	12
3	194407731	FAM43A	0.0162285	0.56	1	NA	NA	0.57	1	0.0013	2	NA	NA
3	128181491	DNAJB8	0.0162649	0.85	5	NA	NA	NA	NA	0.0072	5	0.068	3
20	30053322	DEFB124	0.0163045	NA	NA	0.013	1	0.105	1	0.16	4	0.39	2
6	74072893	KHDC3L	0.0163764	0.064	1	0.22	1	0.022	2	0.08	3	0.76	1
16	85667568	KIAA0182	0.0164608	0.025	14	0.013	7	0.069	8	0.91	20	0.93	10
8	22550335	EGR3	0.0165875	0.0024	1	NA	NA	0.98	1	NA	NA	NA	NA
6	33245441	B3GALT4	0.0166117	NA	NA	NA	NA	NA	NA	0.76	2	0.0031	3
17	706933	NXN	0.0166163	NA	NA	0.0015	3	0.31	3	0.92	3	NA	NA
7	140710396	MRPS33	0.0167447	NA	NA	NA	NA	NA	NA	0.58	1	0.0041	1
13	111268063	CARKD	0.0167578	0.36	3	0.39	3	0.56	8	0.67	6	0.00037	5
7	5643008	FSCN1	0.0168326	0.66	1	0.43	1	0.16	3	0.29	5	0.00149	3
8	86351997	CA3	0.0168504	0.018	1	0.11	1	NA	NA	0.22	2	NA	NA
10	124166131	PLEKHA1	0.0169858	0.61	4	0.47	1	0.046	2	0.0029	5	0.52	2
17	5336666	C1QBP	0.016986	0.0026	2	NA	NA	NA	NA	0.93	2	NA	NA
17	78968905	CHMP6	0.017	NA	NA	0.017	1	NA	NA	NA	NA	NA	NA
5	40764876	PRKAA1	0.017	NA	NA	NA	NA	NA	NA	NA	NA	0.017	1
9	36037065	RECK	0.0170173	0.81	5	0.00031	3	0.61	3	0.21	10	0.62	5
17	61829786	CCDC47	0.0170613	0.2	2	0.25	1	0.14	2	0.11	3	0.026	2
17	39114962	KRT39	0.017204	0.0035	3	0.69	4	0.61	5	0.32	12	0.043	5
1	1219397	SCNN1D	0.0174248	0.012	11	0.17	5	0.93	16	0.033	14	0.33	10
15	52065939	TMOD2	0.0174547	0.0039	2	NA	NA	NA	NA	0.64	3	NA	NA
15	73023725	BBS4	0.0175458	0.013	3	NA	NA	0.44	3	0.025	5	0.66	2
20	44515322	SPATA25	0.0175613	0.00033	1	0.18	3	0.85	2	0.69	4	0.6	3
17	41169899	VAT1	0.0175678	NA	NA	0.3	1	0.57	1	0.97	2	0.00057	2
20	62500730	TPD52L2	0.0175702	0.89	2	0.021	2	0.037	2	0.055	1	0.55	1
19	52934741	ZNF534	0.0176096	0.17	1	0.00027	4	0.67	6	0.91	8	0.75	3
2	128631537	AMMECR1L	0.01761	0.77	2	NA	NA	0.7	1	0.8	2	0.00022	1
7	5983079	RSPH10B	0.0176349	0.42	1	0.55	3	NA	NA	0.002	2	NA	NA
6	53140991	ELOVL5	0.0176607	0.61	1	0.77	1	0.024	2	0.0085	4	0.22	2
10	119774577	RAB11FIP2	0.0178277	NA	NA	0.00017	4	0.76	6	0.83	7	0.9	4
11	13393794	ARNTL	0.0178374	0.16	4	NA	NA	NA	NA	0.016	1	NA	NA
17	38028598	ZPBP2	0.0178913	0.14	2	0.29	1	0.073	3	0.0074	7	0.98	3
2	102992407	IL18R1	0.0178953	0.84	4	0.0018	2	0.79	1	1	4	0.018	3
20	42885925	GDAP1L1	0.0179436	0.15	3	NA	NA	0.21	2	0.015	1	NA	NA
20	47734885	STAU1	0.0179627	NA	NA	NA	NA	NA	NA	0.0029	4	0.89	3
14	23567033	C14orf119	0.018	0.018	1	NA	NA	NA	NA	NA	NA	NA	NA
5	43543191	PAIP1	0.018	0.018	1	NA	NA	NA	NA	NA	NA	NA	NA
1	197890684	LHX9	0.018058	0.053	2	NA	NA	NA	NA	0.049	2	NA	NA
11	61179392	CPSF7	0.0180996	0.31	1	NA	NA	NA	NA	0.0084	2	NA	NA
4	4440183	STX18	0.0180996	0.0028	2	0.93	2	NA	NA	NA	NA	NA	NA
1	109704618	KIAA1324	0.0181059	0.13	9	0.91	10	0.34	6	0.32	11	0.0017	5
16	88494501	ZNF469	0.0181185	0.53	21	0.36	17	0.19	11	0.57	23	0.00106	18
7	38431369	AMPH	0.0182407	0.44	5	0.97	3	0.108	4	0.00048	7	1	5
11	864473	TSPAN4	0.0183242	0.0057	4	0.55	6	0.44	3	0.019	4	0.85	3
16	2279625	E4F1	0.0183673	0.58	5	0.46	5	0.93	4	0.00017	6	0.53	4
1	197057451	ASPM	0.0183971	0.111	27	0.23	16	0.57	19	0.028	45	0.055	27
1	154991027	DCST2	0.0184606	0.16	10	0.0078	9	0.38	15	0.19	20	0.25	9
7	6502775	KDELR2	0.0184664	0.12	2	NA	NA	0.13	2	0.26	3	0.025	1
1	9063541	SLC2A7	0.0184787	0.17	4	0.0066	9	0.69	8	0.47	13	0.062	8
1	169559396	SELP	0.0185236	0.18	14	0.00059	4	0.52	9	1	16	0.41	6
19	45567648	CLASRP	0.0185431	NA	NA	0.11	1	0.61	3	0.0095	5	0.16	2
7	150745974	ASIC3	0.0185797	7e-05	10	0.89	5	0.95	8	0.63	13	0.61	7
5	140762554	PCDHGA7	0.0185906	0.93	5	0.34	5	0.55	9	0.77	15	0.00017	10
12	91358072	EPYC	0.0186715	0.36	4	0.6	1	0.029	4	0.118	5	0.031	3
15	89056292	DET1	0.0187533	NA	NA	0.76	4	0.38	4	0.78	7	0.00046	2
19	58797098	ZNF8	0.0187632	0.0047	7	0.032	4	0.37	7	0.61	13	0.68	5
5	154267810	GEMIN5	0.0189471	0.007	11	0.13	6	0.039	5	1	12	0.66	6
3	149243847	WWTR1	0.0189942	0.5	5	0.32	1	0.56	4	0.64	4	0.00041	3
1	151739679	OAZ3	0.019	NA	NA	NA	NA	NA	NA	0.019	3	NA	NA
11	56344260	OR5M10	0.019	NA	NA	NA	NA	NA	NA	0.019	3	NA	NA
3	2613232	CNTN4	0.0190055	0.55	4	0.17	4	0.11	7	0.088	12	0.026	6
19	53014346	ZNF578	0.0190941	NA	NA	0.28	3	NA	NA	0.0099	5	NA	NA
16	75661803	KARS	0.0191363	0.064	3	0.36	3	0.54	6	0.0021	8	0.91	4
5	37121749	C5orf42	0.0191893	0.59	22	0.74	11	0.14	14	0.00062	22	0.63	13
7	591041	PRKAR1B	0.0193099	0.78	4	0.77	2	0.57	2	0.00032	5	0.22	2
11	3849236	RHOG	0.0193235	NA	NA	0.8	1	0.69	1	0.00022	2	0.89	1
7	156437221	RNF32	0.019334	0.97	5	NA	NA	0.00027	2	0.59	10	0.7	4
1	155292171	RUSC1	0.0193569	0.17	3	0.31	3	0.36	3	0.0017	7	0.75	3
20	42086724	SRSF6	0.0193826	NA	NA	0.96	2	0.34	1	0.0016	3	NA	NA
9	132591509	C9orf78	0.0194227	0.15	1	0.36	3	0.56	1	0.0036	1	NA	NA
9	140449959	WDR85	0.0194287	0.7	7	0.0055	1	0.81	3	0.065	5	0.12	2
1	68171235	GNG12	0.0194819	NA	NA	0.0033	1	NA	NA	0.86	1	NA	NA
2	108910170	SULT1C2	0.0196771	1	5	0.023	7	0.0014	6	0.77	6	1	4
10	104159215	NFKB2	0.0196772	NA	NA	0.11	3	0.8	3	0.0028	6	0.45	2
17	1684605	SMYD4	0.0197083	0.002	10	0.63	6	0.46	8	0.064	15	0.67	9
8	17157531	MTMR7	0.0197776	1	3	0.091	3	0.0026	5	0.8	9	0.132	3
11	124967615	TMEM218	0.0197934	NA	NA	0.0015	2	0.44	1	0.22	2	0.77	1
19	37904703	ZNF569	0.0197981	0.77	1	0.84	1	NA	NA	0.00083	3	NA	NA
17	9804399	RCVRN	0.0199015	0.0004	2	NA	NA	0.59	2	0.77	3	0.62	2
20	1424531	NSFL1C	0.0199633	NA	NA	0.92	2	0.15	2	0.02	3	0.041	3
19	47278859	SLC1A5	0.0199908	0.0039	5	NA	NA	NA	NA	0.75	7	NA	NA
16	88620195	C16orf85	0.02	0.02	1	NA	NA	NA	NA	NA	NA	NA	NA
6	26104280	HIST1H4C	0.02	NA	NA	0.02	2	NA	NA	NA	NA	NA	NA
19	14674472	TECR	0.02	0.02	1	NA	NA	NA	NA	NA	NA	NA	NA
17	38241000	THRA	0.02	0.02	2	NA	NA	NA	NA	NA	NA	NA	NA
16	23568637	UBFD1	0.02	NA	NA	0.02	3	NA	NA	NA	NA	NA	NA
11	640253	DRD4	0.0202591	0.92	2	0.14	1	NA	NA	0.0013	2	0.69	2
19	7671365	CAMSAP3	0.0202893	0.94	2	0.62	2	0.91	2	0.48	3	0.000102	3
5	114961392	TMED7-TICAM2	0.020347	0.0023	2	NA	NA	0.95	4	0.056	4	0.95	2
1	43647424	WDR65	0.0203765	0.27	7	0.098	5	0.83	6	0.35	13	0.0034	7
22	17444640	GAB4	0.0203845	0.64	3	0.033	3	0.42	7	0.0044	15	0.67	4
4	156638428	GUCY1A3	0.0203986	0.0024	3	NA	NA	0.56	2	0.14	5	0.62	2
3	146233866	PLSCR1	0.020422	0.63	3	0.47	1	0.41	1	0.18	3	0.0012	2
10	44052431	ZNF239	0.0204485	0.28	4	NA	NA	0.0067	3	0.48	8	0.13	2
5	160757907	GABRB2	0.0204739	0.0094	2	NA	NA	NA	NA	0.32	3	NA	NA
18	74082536	ZNF516	0.0206855	0.013	9	0.16	6	0.041	7	0.57	12	0.55	7
16	68104042	DUS2L	0.020686	0.049	4	0.71	5	0.29	3	0.005	13	0.53	4
22	32810378	BPIFC	0.0208015	0.00017	2	1	3	0.52	8	0.5	12	0.61	6
11	119210380	C1QTNF5	0.020839	NA	NA	NA	NA	NA	NA	0.83	1	0.0037	2
3	45942551	CCR9	0.020842	0.067	4	0.66	2	0.28	3	0.0039	6	0.56	2
3	11643410	VGLL4	0.0208432	0.8	2	0.048	3	0.0054	3	0.58	2	NA	NA
4	8021340	ABLIM2	0.0209132	NA	NA	0.19	5	0.53	5	0.0015	6	0.8	4
11	2185555	TH	0.0209421	0.47	5	0.44	6	0.21	4	0.00064	10	0.98	4
14	24658776	RP11-468E2.2	0.0209836	NA	NA	0.0043	2	NA	NA	0.72	2	NA	NA
14	34266697	NPAS3	0.0209866	0.26	2	0.41	2	0.27	7	0.094	9	0.0101	4
8	41364598	GOLGA7	0.021	0.021	1	NA	NA	NA	NA	NA	NA	NA	NA
3	129370346	TMCC1	0.0210067	0.0031	2	NA	NA	NA	NA	1	1	NA	NA
2	230632309	TRIP12	0.0210601	0.00048	5	0.52	8	0.34	5	0.39	4	0.83	5
6	136882715	MAP3K5	0.0210623	0.58	7	0.46	3	0.00061	1	0.75	7	NA	NA
2	242129473	ANO7	0.0210708	0.77	16	0.49	9	0.92	14	0.22	26	0.00036	12
5	114961392	TICAM2	0.0211121	0.0023	2	NA	NA	0.95	4	0.059	4	0.95	2
7	141296365	AGK	0.0211428	0.0041	3	0.046	8	0.55	3	0.72	7	0.37	3
6	153296052	FBXO5	0.0211707	NA	NA	0.49	2	0.4	2	0.051	2	0.0123	2
6	47251758	TNFRSF21	0.0212591	0.15	3	0.15	4	0.12	6	0.043	12	0.24	6
11	122848541	BSX	0.0212944	NA	NA	0.5	1	0.43	1	0.93	2	0.00062	2
5	158743719	IL12B	0.0213955	0.0107	4	0.18	1	0.83	3	0.16	7	0.11	1
7	142919424	TAS2R40	0.0214472	0.14	2	0.76	1	NA	NA	0.0056	3	NA	NA
17	3627347	GSG2	0.0215412	0.94	3	0.24	4	0.015	7	0.056	14	0.15	8
7	156979555	UBE3C	0.0216392	0.0066	3	0.28	4	0.11	6	0.44	9	0.32	6
12	122326793	RP11-87C12.2	0.0216855	0.76	2	0.00058	1	0.14	2	0.47	2	0.99	3
6	108029156	SCML4	0.0216937	0.2	3	0.0048	3	NA	NA	0.63	4	NA	NA
14	91357007	RPS6KA5	0.0216981	0.0027	4	0.92	3	0.52	2	0.89	6	0.025	5
2	216861171	MREG	0.0217771	NA	NA	0.17	1	0.17	2	0.0108	2	0.41	1
1	22141206	LDLRAD2	0.0218696	0.013	1	NA	NA	NA	NA	0.25	3	NA	NA
5	128797271	ADAMTS19	0.0219061	0.042	9	0.79	2	0.013	7	0.13	9	0.52	5
11	77934602	GAB2	0.0219977	0.0026	8	0.3	4	0.45	5	0.11	8	0.76	6
3	4403908	SUMF1	0.0220005	NA	NA	0.56	4	0.44	3	0.0025	7	NA	NA
10	77542765	C10orf11	0.0220092	0.048	2	0.12	1	NA	NA	0.107	1	NA	NA
17	17248203	NT5M	0.0220251	0.12	2	0.87	1	0.0022	1	0.4	3	0.32	2
4	667134	ATP5I	0.0220491	0.79	2	0.0023	1	NA	NA	0.34	3	NA	NA
7	129912936	CPA2	0.022087	0.0016	5	0.24	2	0.68	1	0.5	7	NA	NA
6	49439805	CENPQ	0.0220964	0.43	1	0.41	2	0.39	2	0.0019	3	NA	NA
17	57682972	DHX40	0.0220985	NA	NA	0.0094	2	NA	NA	0.35	1	NA	NA
1	224371065	DEGS1	0.0221297	NA	NA	0.057	2	0.22	2	0.012	2	0.87	2
9	101498824	ANKS6	0.0221475	0.14	2	0.19	4	0.86	8	0.0048	16	0.27	9
10	72532300	TBATA	0.0221501	0.32	8	0.054	1	0.75	7	0.26	8	0.0088	3
20	858841	ANGPT4	0.0221797	0.0021	5	0.096	3	0.89	6	0.24	9	0.69	8
2	171822466	GORASP2	0.0221899	0.0058	1	NA	NA	NA	NA	0.57	2	NA	NA
17	37826265	PNMT	0.022191	0.93	3	0.32	3	0.61	6	0.91	8	0.00018	4
15	45409961	DUOXA1	0.0222419	0.57	6	0.022	1	0.026	5	0.104	10	0.88	2
15	90767220	SEMA4B	0.0222456	0.27	5	0.47	8	0.014	11	0.14	15	0.12	11
14	20923826	APEX1	0.0223052	0.31	1	0.0038	1	1	4	0.048	5	0.53	5
19	56693562	GALP	0.0224742	NA	NA	0.38	1	0.8	1	0.0062	1	0.071	1
3	139237264	RBP1	0.0225833	NA	NA	NA	NA	0.0075	1	0.45	1	NA	NA
4	145038059	GYPA	0.0226452	0.0004	3	0.46	7	0.62	2	0.32	3	0.84	1
7	769344	HEATR2	0.022684	0.8	11	0.7	5	0.00031	5	0.23	12	0.77	5
2	233391303	CHRND	0.0227075	0.48	4	0.45	8	0.36	8	0.00045	9	0.88	6
8	16973969	EFHA2	0.0227177	0.55	1	NA	NA	0.0073	3	0.16	3	NA	NA
9	33750845	PRSS3	0.0227691	NA	NA	0.46	4	0.72	3	0.98	4	0.00042	1
11	64665374	ATG2A	0.0227774	0.28	14	0.099	6	0.0066	16	0.19	21	0.89	10
18	685940	ENOSF1	0.0227839	0.016	3	0.52	5	0.41	2	0.04	5	NA	NA
20	1456964	SIRPB2	0.0228037	0.55	6	0.58	2	0.0066	4	0.023	6	0.64	3
12	33532804	SYT10	0.0229051	0.37	6	NA	NA	0.015	1	0.117	4	NA	NA
9	106857824	SMC2	0.0229103	0.18	8	0.6	5	0.17	8	1	14	0.0017	8
1	155695231	DAP3	0.0229104	0.0012	2	0.19	3	0.31	2	0.69	3	0.64	3
16	57546739	CCDC102A	0.0229193	NA	NA	0.88	3	0.73	1	0.00034	5	0.63	2
14	23587838	CEBPE	0.022998	NA	NA	NA	NA	0.24	2	0.068	3	0.04	1
5	175926081	FAF2	0.023	NA	NA	NA	NA	NA	NA	0.023	1	NA	NA
15	78582044	WDR61	0.023	NA	NA	0.023	1	NA	NA	NA	NA	NA	NA
7	22194211	RAPGEF5	0.0230012	0.017	2	0.065	2	0.84	4	0.149	5	NA	NA
2	172822320	HAT1	0.0230434	0.32	2	0.0108	2	NA	NA	NA	NA	NA	NA
9	125424164	OR1L1	0.0230573	0.13	4	0.19	4	0.5	9	0.0044	9	0.58	6
1	93965129	FNBP1L	0.0230706	NA	NA	0.015	2	0.19	2	0.23	2	NA	NA
11	63233686	HRASLS5	0.0231507	0.0014	5	0.55	3	0.39	3	0.12	8	0.88	4
12	56142670	GDF11	0.0231551	NA	NA	1	1	0.75	1	0.104	1	0.00179	1
4	44682465	GUF1	0.0232735	0.96	6	1	4	0.75	3	0.37	8	0.00012	3
1	55014013	ACOT11	0.0232929	0.41	7	0.29	5	0.098	6	0.41	6	0.0067	6
8	126021414	SQLE	0.0233037	NA	NA	0.62	1	0.83	2	0.74	3	0.00037	1
12	95451388	NR2C1	0.0233187	0.4	2	0.71	2	0.014	4	0.0096	5	0.84	6
17	42328621	SLC4A1	0.023385	0.042	6	0.34	10	0.025	7	0.82	11	0.11	8
17	39777047	JUP	0.0234399	0.013	10	0.9	14	0.0093	4	0.54	8	0.55	5
22	19026556	DGCR2	0.023458	0.5	2	0.7	6	0.62	4	0.00021	11	0.71	6
6	30154049	TRIM26	0.0234964	0.66	2	0.12	3	0.79	3	0.00064	6	0.81	2
16	90075750	DBNDD1	0.0235353	1	2	0.58	1	0.73	3	0.00012	5	0.64	3
2	240981262	PRR21	0.0235692	0.91	1	0.0039	2	NA	NA	NA	NA	NA	NA
15	65489128	CILP	0.023779	0.17	18	0.92	7	0.64	11	0.0006	26	0.55	9
21	46875586	COL18A1	0.0237797	0.15	17	0.022	15	0.35	15	0.13	30	0.22	12
19	49436980	DHDH	0.0238468	0.0028	5	0.99	4	0.22	6	0.32	8	0.17	5
19	58198887	AC004017.1	0.0238566	0.24	1	0.015	1	NA	NA	NA	NA	NA	NA
4	42457348	ATP8A1	0.0238729	NA	NA	0.35	2	0.042	5	0.062	13	0.16	4
11	48142818	PTPRJ	0.0238819	0.29	15	0.62	8	0.98	18	0.0051	25	0.037	12
11	55798145	OR5AS1	0.023895	0.24	5	NA	NA	0.39	4	0.03	10	0.052	2
13	96485204	UGGT2	0.0239774	0.63	12	0.69	7	0.22	9	0.053	16	0.0066	11
19	36940622	ZNF566	0.0239982	NA	NA	NA	NA	0.0069	2	0.82	2	0.122	2
1	117249108	C1orf137	0.024	NA	NA	0.024	1	NA	NA	NA	NA	NA	NA
20	14306361	FLRT3	0.024	NA	NA	NA	NA	NA	NA	0.024	2	NA	NA
19	54599119	OSCAR	0.024	NA	NA	NA	NA	NA	NA	0.024	3	NA	NA
19	11725465	ZNF627	0.024	0.024	2	NA	NA	NA	NA	NA	NA	NA	NA
7	57528672	ZNF716	0.024	0.024	1	NA	NA	NA	NA	NA	NA	NA	NA
9	140108849	NDOR1	0.0240137	0.63	10	0.00022	2	0.84	9	0.64	19	0.45	10
4	78815326	MRPL1	0.0240703	0.025	3	NA	NA	0.028	3	0.99	3	NA	NA
14	105167807	INF2	0.0241274	0.8	4	0.59	2	0.00016	12	0.86	13	0.52	8
1	240070944	CHRM3	0.0242671	0.25	3	0.93	3	0.0024	5	0.086	7	0.71	4
12	110205831	FAM222A	0.0243678	0.96	2	0.59	1	0.92	4	0.047	6	0.0014	3
11	128772452	C11orf45	0.0243789	0.3	3	0.86	1	0.31	3	0.00066	4	0.65	3
7	127014438	ZNF800	0.0244714	0.0042	3	0.026	1	0.94	3	0.82	5	0.41	1
16	57507884	DOK4	0.0246028	0.017	3	NA	NA	0.39	3	0.028	6	0.82	3
13	41508049	ELF1	0.0246894	0.74	5	0.46	5	0.93	6	0.013	13	0.0085	8
7	6449496	DAGLB	0.0247234	0.78	5	0.43	4	0.00058	6	0.53	11	0.34	11
12	31446744	FAM60A	0.0247701	0.71	1	NA	NA	NA	NA	0.0053	1	NA	NA
12	52708420	KRT83	0.0248101	0.41	3	0.74	3	0.044	3	0.024	5	0.11	2
14	56585441	PELI2	0.0248106	0.89	6	0.2	1	0.25	4	0.0012	6	0.66	5
2	37439056	CEBPZ	0.0249059	0.77	8	0.03	6	0.98	7	0.54	12	0.0029	6
4	40245517	RHOH	0.0249765	0.076	1	NA	NA	NA	NA	0.05	1	NA	NA
11	64074743	ESRRA	0.025	NA	NA	0.025	1	NA	NA	NA	NA	NA	NA
22	35658407	HMGXB4	0.025	NA	NA	NA	NA	NA	NA	0.025	3	NA	NA
7	108205125	THAP5	0.025	NA	NA	NA	NA	NA	NA	0.025	2	NA	NA
2	190660537	PMS1	0.0250754	0.019	9	0.76	6	0.0094	4	0.91	14	0.29	10
11	58978684	MPEG1	0.0250835	NA	NA	0.23	6	0.21	4	0.27	8	0.012	6
6	116599896	TSPYL1	0.0251096	0.59	5	0.78	1	0.0078	2	0.025	2	0.4	2
2	149798512	KIF5C	0.0251215	NA	NA	0.44	2	0.49	2	0.0034	4	NA	NA
16	18844389	SMG1	0.0251377	0.7	3	NA	NA	0.005	3	0.065	13	0.69	5
12	56398471	SUOX	0.0251646	NA	NA	0.68	2	0.0017	4	0.17	8	0.8	3
9	27168571	TEK	0.025257	0.074	6	0.2	4	0.23	3	0.38	9	0.028	2
15	90798991	TTLL13	0.025325	0.61	2	0.47	3	0.0059	5	0.086	10	0.25	3
17	35872924	DUSP14	0.0255311	0.38	1	NA	NA	0.57	2	0.39	1	0.0019	1
16	1827843	SPSB3	0.0256349	0.26	2	0.21	3	0.26	2	0.87	4	0.003	2
17	27225709	DHRS13	0.0256587	0.66	5	0.101	1	0.97	4	0.0025	4	NA	NA
15	71124471	LARP6	0.0256984	NA	NA	0.0113	4	0.027	3	0.9	4	0.59	2
2	33172816	LTBP1	0.0257897	0.00087	16	0.34	10	0.86	18	0.15	19	0.98	13
6	29911183	HLA-A	0.0258095	NA	NA	0.79	1	NA	NA	0.005	1	NA	NA
18	9944924	VAPA	0.0258332	NA	NA	0.0039	1	0.75	2	0.26	2	NA	NA
12	57137895	PRIM1	0.0258657	0.48	1	0.69	2	NA	NA	0.0023	3	NA	NA
10	92503383	HTR7	0.0259131	0.66	3	0.13	3	0.028	2	0.016	4	0.98	2
19	2278936	C19orf35	0.0259337	0.84	1	0.026	2	NA	NA	0.035	2	NA	NA
1	163117173	RGS5	0.0259911	0.36	1	0.99	1	NA	NA	0.033	1	0.014	1
1	204170825	GOLT1A	0.0259998	NA	NA	0.3	1	0.44	1	0.026	2	0.048	1
5	79949873	DHFR	0.026	NA	NA	0.026	1	NA	NA	NA	NA	NA	NA
2	187692983	ZSWIM2	0.0260199	0.0009	2	0.4	2	0.81	6	0.13	9	1	6
6	37451032	CCDC167	0.0260969	0.0058	1	NA	NA	NA	NA	0.69	2	NA	NA
6	72889549	RIMS1	0.0261191	0.31	4	0.8	4	0.15	7	0.0025	10	0.41	6
9	131583067	ENDOG	0.0261852	NA	NA	NA	NA	NA	NA	0.49	4	0.0082	2
11	67223087	CABP4	0.0262668	0.071	5	0.82	4	0.34	4	0.0029	5	0.67	2
17	74003318	EVPL	0.0262679	0.94	19	0.086	10	0.12	18	0.0061	30	0.65	10
13	52343391	DHRS12	0.0262829	0.93	3	0.016	4	0.12	3	0.98	4	0.022	3
19	43857873	CD177	0.0263131	0.015	1	0.53	1	0.098	1	0.15	2	0.33	2
10	71164595	TACR2	0.0264577	0.22	3	0.061	5	0.46	8	0.18	17	0.035	8
9	95869989	C9orf89	0.0265633	0.45	5	0.11	1	0.15	2	0.085	4	0.062	2
20	31596430	BPIFB2	0.0266789	0.74	7	NA	NA	0.15	9	0.014	14	0.11	7
16	89167717	ACSF3	0.0267938	0.16	14	0.0042	3	0.89	5	0.39	11	0.17	5
9	95378176	IPPK	0.0268495	0.0043	7	0.91	3	0.23	5	0.13	9	0.34	7
9	96860047	PTPDC1	0.02688	0.73	8	0.68	2	0.47	4	0.61	11	0.00028	7
11	5423977	OR51J1	0.027	NA	NA	0.027	3	NA	NA	NA	NA	NA	NA
16	31485553	TGFB1I1	0.027	0.027	1	NA	NA	NA	NA	NA	NA	NA	NA
3	187444617	BCL6	0.0271002	0.52	4	0.04	1	0.097	1	1	3	0.02	1
19	42260606	CEACAM6	0.0271791	0.35	2	0.28	2	0.94	1	0.022	2	0.02	2
10	101090627	CNNM1	0.0272197	0.054	4	0.031	2	0.48	2	0.64	3	0.079	2
1	16390023	FAM131C	0.0272503	0.2	1	0.17	2	NA	NA	0.024	1	NA	NA
1	20517116	UBXN10	0.0273794	0.00098	4	0.47	2	0.2	3	0.89	4	0.5	3
14	64988814	ZBTB1	0.0276014	0.028	2	NA	NA	0.26	3	0.114	3	NA	NA
10	90524335	LIPN	0.0276993	0.55	3	0.13	3	0.48	5	0.76	5	0.0016	4
7	84628989	SEMA3D	0.0277079	0.48	5	0.65	2	0.68	6	0.24	6	0.00082	4
1	24175151	FUCA1	0.0277171	NA	NA	0.032	3	0.33	4	0.38	5	0.045	4
3	61975382	PTPRG	0.0277419	0.64	11	0.14	5	0.83	13	0.75	21	0.00075	11
1	25633189	RHD	0.0277901	0.047	1	0.035	18	0.38	1	0.11	2	0.61	1
3	10146208	C3orf24	0.0278495	0.74	1	0.07	2	0.27	5	0.013	3	NA	NA
16	71682818	PHLPP2	0.0278978	0.065	9	0.49	4	0.92	10	0.12	16	0.012	9
2	88825965	C2orf51	0.0278981	0.072	6	0.56	3	0.81	3	0.0038	6	0.34	3
6	35715135	ARMC12	0.0279284	0.0052	4	0.56	5	0.55	7	0.91	9	0.029	5
15	51675988	GLDN	0.0279433	0.66	5	0.3	7	0.39	9	0.066	10	0.0083	8
14	24040436	JPH4	0.028	NA	NA	NA	NA	NA	NA	0.028	2	NA	NA
2	182542623	NEUROD1	0.028	0.028	4	NA	NA	NA	NA	NA	NA	NA	NA
15	89449879	MFGE8	0.028045	0.52	3	0.32	3	0.22	5	0.83	7	0.0014	4
5	179538506	RASGEF1C	0.0281019	0.73	3	0.83	1	0.4	2	0.00076	3	NA	NA
3	151154509	IGSF10	0.0282038	0.00105	16	0.54	21	0.86	34	0.11	49	0.8	23
16	88891219	GALNS	0.0282636	0.56	10	0.48	10	0.026	6	0.028	8	0.22	4
19	40095924	LGALS13	0.028269	0.93	4	0.7	4	0.21	7	0.15	7	0.0021	4
13	96239805	DZIP1	0.0282818	0.026	4	0.072	4	0.49	5	0.87	7	0.054	3
20	23472317	CST8	0.0283856	0.53	4	NA	NA	0.025	3	0.065	6	NA	NA
4	70723299	SULT1E1	0.0284541	NA	NA	NA	NA	0.6	1	0.045	2	0.032	1
8	71033538	NCOA2	0.0285318	0.32	3	0.87	4	0.041	10	0.0043	14	0.89	7
8	95738586	DPY19L4	0.0286934	0.23	7	0.05	4	0.98	5	0.017	9	0.23	7
19	58549593	ZSCAN1	0.0287004	0.79	2	0.00042	4	0.22	5	0.61	7	0.99	2
6	151626933	AKAP12	0.0287797	0.11	21	0.89	12	0.34	14	0.35	30	0.0038	20
9	136233510	SURF4	0.0288166	0.18	1	NA	NA	NA	NA	0.025	2	NA	NA
19	6753605	SH2D3A	0.028883	0.4	7	0.02	9	0.78	8	0.87	15	0.0082	7
14	21250124	RNASE6	0.0289462	0.58	1	NA	NA	NA	NA	0.0078	2	NA	NA
13	37524085	ALG5	0.029	0.029	2	NA	NA	NA	NA	NA	NA	NA	NA
3	49463396	NICN1	0.029	0.029	3	NA	NA	NA	NA	NA	NA	NA	NA
10	11047400	CELF2	0.0290319	NA	NA	0.021	1	0.14	2	0.098	1	0.67	2
21	43766655	TFF2	0.029034	0.29	6	NA	NA	NA	NA	0.36	3	0.0085	3
5	140021612	TMCO6	0.0291012	0.0119	1	NA	NA	NA	NA	0.11	7	0.68	3
6	170140288	TCTE3	0.0291404	0.019	3	0.24	1	NA	NA	NA	NA	NA	NA
1	29447509	TMEM200B	0.0291907	0.025	1	NA	NA	0.065	1	0.55	1	NA	NA
17	30195122	UTP6	0.0291917	0.0012	6	0.52	4	0.54	3	0.17	6	0.79	5
17	9862550	GAS7	0.0293006	0.19	1	NA	NA	0.24	2	0.039	4	0.11	2
4	956237	DGKQ	0.0293161	0.0034	8	0.68	3	0.71	6	0.075	7	0.37	5
10	114220306	VTI1A	0.0294035	0.0024	4	NA	NA	0.47	2	0.8	2	NA	NA
4	84465731	AGPAT9	0.0294398	0.076	2	0.038	6	0.045	3	0.84	7	0.42	6
7	142989560	CASP2	0.0294784	0.15	3	0.22	2	NA	NA	0.013	3	0.46	1
11	45931647	PEX16	0.0295214	0.63	9	0.096	1	NA	NA	0.015	3	NA	NA
19	11040127	C19orf52	0.029543	0.38	2	NA	NA	0.16	3	0.0037	3	0.88	3
20	10386013	MKKS	0.0295529	0.57	8	0.38	5	0.063	5	0.26	6	0.013	4
17	8045157	PER1	0.029563	0.88	8	0.012	6	0.038	12	0.23	16	0.5	10
1	92161307	TGFBR3	0.0296498	0.69	4	0.0013	6	0.8	6	0.17	9	0.38	5
8	131072826	ASAP1	0.0297708	0.26	6	0.42	3	0.24	3	0.89	6	0.002	5
19	55879672	IL11	0.0298372	0.43	3	0.4	1	0.00084	2	0.81	2	0.4	2
16	10837913	NUBP1	0.0299012	0.16	1	NA	NA	NA	NA	0.073	3	0.079	3
2	172309651	DCAF17	0.0299258	1	2	0.0022	6	0.91	6	0.027	5	0.87	5
3	170136972	CLDN11	0.0299572	NA	NA	0.062	1	NA	NA	0.076	1	NA	NA
9	139390546	NOTCH1	0.0299864	0.3	10	0.18	15	0.21	16	0.026	26	0.16	16
19	58790675	AC010642.1	0.03	NA	NA	0.03	1	NA	NA	NA	NA	NA	NA
19	19291568	MEF2BNB-MEF2B	0.03	NA	NA	NA	NA	NA	NA	0.03	1	NA	NA
2	190618698	OSGEPL1	0.03	NA	NA	NA	NA	NA	NA	0.03	3	NA	NA
11	18158753	MRGPRX3	0.0300429	0.32	4	0.22	1	0.0067	1	0.43	1	NA	NA
11	116706664	APOA1	0.0300674	NA	NA	0.79	3	0.024	2	0.51	3	0.021	3
12	6687692	CHD4	0.0300763	NA	NA	0.12	1	0.9	2	0.033	4	0.057	1
7	30791848	INMT-FAM188B	0.0300991	0.71	2	0.91	4	0.9	4	0.16	5	0.00051	6
1	161141673	B4GALT3	0.0301358	NA	NA	0.37	3	0.42	2	0.0057	3	0.23	2
1	7845014	PER3	0.0301474	0.55	20	0.11	12	0.42	14	0.039	22	0.048	13
19	47995358	NAPA	0.0301981	NA	NA	NA	NA	NA	NA	0.71	3	0.0067	2
2	160798377	PLA2R1	0.0303168	0.16	14	0.65	8	0.91	9	0.0013	20	0.39	13
15	91448626	MAN2A2	0.0303346	0.94	12	0.69	5	0.21	4	0.00043	19	0.82	8
10	17275596	VIM	0.0304111	0.61	2	0.91	1	NA	NA	0.0017	4	NA	NA
4	154279752	MND1	0.0304279	0.016	1	NA	NA	NA	NA	0.3	4	NA	NA
5	138283099	SIL1	0.0304938	1	4	0.00131	1	0.44	1	0.21	6	0.4	2
12	55725690	OR6C3	0.0305406	0.067	6	NA	NA	0.2	2	0.5	6	0.031	3
5	141021093	FCHSD1	0.0305586	0.3	8	0.33	5	0.58	7	0.47	10	0.0018	5
9	132566551	TOR1B	0.0305785	NA	NA	0.57	3	0.39	1	0.0018	4	0.52	3
16	24788645	TNRC6A	0.0305838	0.22	11	0.2	14	0.48	23	0.49	28	0.0047	16
16	69381807	RP11-343C2.7	0.0306614	0.12	2	0.53	1	NA	NA	0.015	5	NA	NA
5	175798736	ARL10	0.0308016	0.00045	2	0.85	2	0.86	1	0.65	4	0.23	2
2	211163209	MYL1	0.030852	0.92	3	0.42	2	0.62	5	0.49	6	0.00042	4
17	7749572	KDM6B	0.0309106	0.035	5	0.048	2	0.48	7	0.84	10	0.073	6
14	102843111	TECPR2	0.0309365	0.065	12	0.37	6	0.75	8	0.61	10	0.0045	7
1	114437707	AP4B1	0.0309414	0.37	6	0.37	3	0.034	4	0.56	7	0.019	6
17	40612929	ATP6V0A1	0.0309533	0.83	2	0.64	2	0.46	7	0.0052	9	0.039	5
2	74803718	C2orf65	0.0309898	0.96	2	0.18	4	0.65	4	0.0026	6	0.17	3
10	101379915	SLC25A28	0.031	NA	NA	NA	NA	NA	NA	0.031	1	NA	NA
22	30136701	ZMAT5	0.031	NA	NA	NA	NA	NA	NA	0.031	2	NA	NA
16	30996986	HSD3B7	0.0310143	0.76	2	0.86	1	0.78	5	0.65	8	0.00015	4
2	39281888	SOS1	0.0310375	0.55	1	1	14	0.13	5	0.012	9	0.058	4
1	19235138	IFFO2	0.031096	NA	NA	0.58	1	0.89	1	0.00059	3	0.7	2
12	108589662	WSCD2	0.0311438	NA	NA	0.041	2	0.94	2	0.0084	5	0.66	2
11	93469364	TAF1D	0.0311745	0.86	4	0.016	2	0.63	2	0.017	4	0.34	3
1	6378607	ACOT7	0.0311893	0.68	3	0.0123	2	0.32	1	0.08	1	NA	NA
4	8368698	ACOX3	0.0313165	0.33	15	0.29	5	0.52	7	0.039	17	0.026	7
6	87725340	HTR1E	0.0313514	0.038	3	NA	NA	0.019	4	0.83	4	0.36	4
19	55556527	RDH13	0.0314081	0.99	2	NA	NA	0.68	5	0.51	6	0.00063	6
5	112769494	TSSK1B	0.0315962	0.15	6	0.016	3	0.38	6	0.17	13	0.33	9
4	10445207	ZNF518B	0.0316046	0.62	13	0.54	6	0.012	9	0.013	17	0.98	7
16	66918288	PDP2	0.0316704	0.68	5	0.98	1	0.32	3	0.00043	5	0.56	6
5	39285311	C9	0.0317288	0.1	5	0.38	11	0.14	9	0.044	20	0.22	8
1	24201162	CNR2	0.031844	0.62	2	0.71	1	0.38	3	0.043	7	0.0072	3
19	17972120	RPL18A	0.031862	NA	NA	NA	NA	0.13	1	0.039	1	NA	NA
9	21206532	IFNA10	0.032	NA	NA	0.032	1	NA	NA	NA	NA	NA	NA
19	19291568	MEF2BNB	0.032	NA	NA	NA	NA	NA	NA	0.032	1	NA	NA
11	61015916	PGA5	0.032	NA	NA	0.032	2	NA	NA	NA	NA	NA	NA
17	3101542	OR1A2	0.0320119	0.084	3	0.14	2	0.48	3	0.37	3	0.025	3
19	41198056	ADCK4	0.0320454	0.0052	4	0.98	2	NA	NA	0.19	6	0.23	3
12	21628504	RECQL	0.0321402	0.99	5	0.6	4	0.63	5	0.52	9	0.00027	4
17	27011891	SUPT6H	0.0321501	0.012	4	0.36	3	0.26	5	0.12	8	0.39	4
17	18022364	MYO15A	0.032203	0.77	17	0.2	24	0.0061	25	0.11	39	0.51	22
12	52629023	KRT7	0.032206	0.3	4	0.76	3	0.71	4	0.0044	6	0.074	3
3	185146527	MAP3K13	0.0322569	0.23	5	0.35	6	0.0117	8	0.17	14	0.33	8
16	819441	MSLNL	0.0323483	0.027	5	0.27	10	0.2	11	0.04	15	0.91	8
17	37829460	PGAP3	0.0324555	0.28	4	0.58	3	0.54	4	0.77	5	0.00079	3
21	44151970	PDE9A	0.0325033	NA	NA	0.58	1	0.15	8	0.0039	11	0.67	7
4	1066769	RNF212	0.0325122	0.00025	8	0.63	4	0.72	8	0.89	8	0.53	5
16	58073895	MMP15	0.032677	0.0139	4	0.23	5	0.31	3	0.32	10	0.17	2
5	141694117	SPRY4	0.0326932	0.91	3	0.18	2	0.61	5	0.2	5	0.0027	5
8	38002807	STAR	0.0327098	0.46	2	0.93	4	0.28	3	0.00046	4	0.98	2
11	123753958	TMEM225	0.0327486	0.089	3	0.31	1	0.012	3	0.38	2	0.43	2
1	247004295	AHCTF1	0.0327806	0.35	12	0.82	10	0.036	13	0.76	16	0.0069	9
3	38080717	DLEC1	0.0328488	0.083	16	0.74	11	0.118	18	0.125	45	0.06	27
8	71619374	XKR9	0.0329591	0.44	5	0.98	3	0.24	8	0.0016	8	0.33	6
7	92963242	CCDC132	0.0329818	NA	NA	0.79	1	0.9	3	0.46	8	0.00071	3
8	99961655	OSR2	0.033	NA	NA	0.033	1	NA	NA	NA	NA	NA	NA
2	241631588	AQP12A	0.0330932	NA	NA	0.51	1	NA	NA	0.0104	1	NA	NA
17	45773594	TBKBP1	0.0331112	0.24	2	0.36	1	NA	NA	0.51	4	0.0053	1
16	81397495	GAN	0.0332424	0.0046	1	0.38	4	0.44	2	0.09	4	0.8	2
3	142840524	CHST2	0.0333616	0.96	3	0.104	1	0.083	2	0.56	1	0.012	3
14	101198426	DLK1	0.0334076	0.89	3	0.8	2	0.86	6	0.93	8	9.8e-05	4
6	45870832	CLIC5	0.0334882	0.58	9	NA	NA	0.48	6	0.00104	12	0.82	10
3	186257331	CRYGS	0.0335744	0.0071	1	NA	NA	NA	NA	0.76	2	NA	NA
15	45803419	SLC30A4	0.0335905	0.0057	2	0.63	1	NA	NA	0.3	1	NA	NA
1	48231630	TRABD2B	0.0336058	NA	NA	0.73	2	NA	NA	0.0074	1	NA	NA
13	77566090	CLN5	0.0336069	0.55	3	0.14	11	NA	NA	0.014	2	NA	NA
9	96080699	C9orf129	0.0336349	0.71	2	0.8	1	NA	NA	0.0019	2	NA	NA
17	9729445	GLP2R	0.0337563	0.00093	4	0.73	3	0.087	6	0.99	5	0.97	5
4	54327696	LNX1	0.0338012	0.77	13	0.37	6	0.014	7	0.075	13	0.19	9
19	1244170	ATP5D	0.033804	0.34	1	NA	NA	NA	NA	0.016	1	NA	NA
19	39292666	LGALS4	0.0338238	0.81	3	0.41	2	0.89	3	0.25	4	0.00077	1
6	90642195	BACH2	0.0338311	0.31	8	0.017	3	0.9	7	0.024	9	0.5	5
2	232070959	ARMC9	0.0338543	0.119	9	0.6	5	0.57	7	1	12	0.0014	4
17	8285501	RPL26	0.0339083	NA	NA	0.26	1	NA	NA	NA	NA	0.021	1
16	1584556	TMEM204	0.0339083	0.13	4	NA	NA	NA	NA	0.042	3	NA	NA
16	66967623	FAM96B	0.034	0.034	1	NA	NA	NA	NA	NA	NA	NA	NA
4	165891141	TRIM61	0.034	NA	NA	0.034	1	NA	NA	NA	NA	NA	NA
19	7075115	ZNF557	0.0340169	0.2	5	0.85	2	0.0028	6	0.18	6	0.67	5
9	139848190	LCN12	0.0341123	0.7	2	0.26	5	0.8	3	0.0018	5	0.22	3
3	195974246	PCYT1A	0.0341423	0.92	3	0.79	2	0.14	3	0.0024	3	NA	NA
3	122287775	DTX3L	0.034153	0.00016	5	0.51	3	0.82	5	0.89	9	0.97	3
11	6007202	OR52L1	0.0342141	1	4	0.023	1	0.48	1	0.0053	5	0.99	1
17	62121452	ERN1	0.0342493	0.038	7	0.87	5	0.9	3	0.0026	6	0.75	5
19	9801052	ZNF812	0.0342865	0.42	1	0.84	2	0.156	2	0.24	2	0.0044	2
6	32713181	HLA-DQA2	0.0343765	0.065	2	0.16	3	0.66	2	0.0109	3	0.78	2
7	139734069	PARP12	0.0345406	0.06	5	0.0064	3	NA	NA	0.98	6	0.66	2
2	74058012	STAMBP	0.0346933	0.75	5	0.025	2	0.092	1	0.039	5	0.88	5
12	15102799	ARHGDIB	0.0347787	NA	NA	0.018	1	0.89	1	0.029	1	0.54	2
17	43212963	ACBD4	0.0348018	0.0064	3	NA	NA	NA	NA	0.88	3	NA	NA
12	121448916	C12orf43	0.0348391	0.72	3	0.48	1	0.69	5	0.51	4	0.00049	5
14	24723362	TGM1	0.0348727	0.006	7	0.23	12	0.34	7	0.24	22	0.53	9
7	116140419	CAV2	0.035	NA	NA	NA	NA	NA	NA	0.035	2	NA	NA
4	186357255	C4orf47	0.0350799	0.00064	2	0.17	1	0.87	3	0.86	4	0.74	2
5	40841609	CARD6	0.0351237	0.28	10	0.0036	6	0.47	12	0.49	22	0.26	10
18	57103282	CCBE1	0.0352604	0.75	7	0.3	5	0.68	6	0.00063	11	0.63	6
4	38799444	TLR1	0.035396	0.14	6	0.46	5	0.16	6	0.77	13	0.0077	9
2	159663599	DAPL1	0.0354072	0.98	2	0.11	1	0.018	4	0.7	5	0.045	4
17	64728897	PRKCA	0.0354977	0.95	2	0.65	1	0.0161	1	0.026	2	NA	NA
9	135139826	SETX	0.0355101	0.41	17	0.024	22	0.16	22	0.26	32	0.15	14
3	133472449	TF	0.0355573	0.8	6	0.0019	7	0.22	7	0.2	15	0.92	7
20	43850400	SEMG2	0.0356339	0.0064	6	0.33	3	0.58	4	0.28	9	0.18	6
7	92000827	ANKIB1	0.0356721	0.64	4	0.58	2	0.14	7	0.34	14	0.0035	8
20	18470608	RBBP9	0.035712	0.58	4	0.096	2	NA	NA	0.021	1	NA	NA
13	31480720	C13orf33	0.0357375	0.038	3	NA	NA	0.28	1	0.11	2	NA	NA
14	52477613	NID2	0.0357529	0.94	25	0.39	17	0.57	23	0.33	34	0.0009	21
9	139100882	QSOX2	0.0358275	0.038	3	0.88	5	1	4	0.0038	7	0.49	2
9	139840422	C8G	0.0358402	0.35	5	0.66	4	0.0049	4	0.43	7	0.128	6
9	91083288	SPIN1	0.0358883	0.39	1	0.29	1	0.25	1	0.92	1	0.0024	1
3	101293089	PCNP	0.036	NA	NA	NA	NA	NA	NA	0.036	1	NA	NA
14	37050642	NKX2-8	0.0360808	0.49	1	NA	NA	NA	NA	0.012	3	NA	NA
15	85643398	PDE8A	0.0361256	0.68	5	0.015	2	0.13	2	0.2	5	NA	NA
11	75507398	DGAT2	0.0362578	0.013	3	0.66	3	0.013	4	0.72	6	0.79	5
22	40417608	FAM83F	0.0362821	0.96	3	0.85	1	0.69	6	0.024	11	0.0047	4
10	103530135	FGF8	0.0364365	0.026	3	0.42	2	0.11	1	NA	NA	NA	NA
15	72118997	MYO9A	0.036452	0.98	16	0.029	10	0.67	18	0.14	33	0.024	16
2	189914122	COL5A2	0.0364596	0.27	11	0.64	4	0.91	8	0.0037	17	0.11	10
1	40312903	TRIT1	0.0365075	1	3	0.041	2	0.9	3	0.0022	8	0.79	4
3	54952644	LRTM1	0.036602	0.48	5	0.016	3	0.32	2	0.11	6	NA	NA
17	29298304	RNF135	0.0366736	0.42	1	0.13	3	0.26	3	0.013	6	0.35	5
19	53453880	ZNF816	0.0368941	NA	NA	0.21	1	0.016	3	0.22	7	0.37	3
12	123467177	ARL6IP4	0.0369975	NA	NA	NA	NA	NA	NA	0.0073	2	0.83	1
2	131350616	CFC1	0.037	NA	NA	0.037	2	NA	NA	NA	NA	NA	NA
4	102751076	BANK1	0.0370486	0.3	5	0.78	1	0.024	2	0.049	6	NA	NA
22	24709420	KB-1896H10.1	0.0370709	0.0005	10	0.79	6	0.27	9	0.77	15	0.8	8
10	103348155	DPCD	0.0371047	0.16	1	0.038	1	NA	NA	NA	NA	NA	NA
1	223980207	TP53BP2	0.0371909	0.016	4	0.98	6	0.28	8	0.016	12	0.94	6
2	233735073	C2orf82	0.0372067	NA	NA	NA	NA	0.0061	1	1	2	NA	NA
3	36756863	DCLK3	0.0372277	NA	NA	0.14	2	0.53	7	0.45	7	0.0083	4
2	54853217	SPTBN1	0.0372328	0.54	7	0.8	6	0.77	7	0.00163	11	0.122	9
3	132047132	ACPP	0.0372498	0.00037	3	0.81	1	0.93	2	0.25	5	0.95	5
5	111071138	NREP	0.0372891	0.23	2	0.11	2	0.13	2	0.36	2	0.056	2
12	53900640	NPFF	0.0373338	NA	NA	0.23	1	0.0076	2	0.71	3	NA	NA
2	10908893	ATP6V1C2	0.037419	0.46	2	0.61	1	0.3	5	0.022	5	0.036	4
3	49053918	DALRD3	0.0375301	0.33	2	0.87	2	0.73	1	0.94	3	0.00034	3
12	7457072	ACSM4	0.0375561	0.37	9	0.92	5	0.54	3	0.96	9	0.00038	8
1	15870989	DNAJC16	0.0375757	0.15	3	0.078	2	NA	NA	0.107	3	NA	NA
22	24709420	SPECC1L	0.0376035	0.00054	11	0.79	6	0.21	11	0.75	17	1	9
5	173317206	CPEB4	0.037611	NA	NA	0.95	1	0.34	2	0.0013	4	0.67	3
12	124171453	TCTN2	0.0376133	0.8	6	0.11	3	0.41	4	0.81	7	0.0023	4
7	76054372	ZP3	0.0377285	0.012	3	0.11	3	0.08	4	0.82	3	0.78	4
15	76630655	ISL2	0.0377413	0.073	2	NA	NA	NA	NA	0.085	3	NA	NA
5	10227711	FAM173B	0.0377891	0.37	5	0.043	1	0.56	4	0.019	8	0.4	3
21	33949098	TCP10L	0.0379191	0.048	2	NA	NA	NA	NA	0.13	1	NA	NA
19	45452024	APOC2	0.0379698	NA	NA	0.25	1	NA	NA	0.025	3	NA	NA
16	30435651	DCTPP1	0.038	0.038	2	NA	NA	NA	NA	NA	NA	NA	NA
13	77581510	FBXL3	0.038	0.038	2	NA	NA	NA	NA	NA	NA	NA	NA
14	22434148	TRAV12-3	0.038	NA	NA	0.038	1	NA	NA	NA	NA	NA	NA
21	34619126	AP000295.9	0.0381222	0.13	5	0.101	2	1	4	0.83	8	0.0063	6
7	22985435	FAM126A	0.0383139	0.091	6	NA	NA	0.76	4	0.019	11	0.22	4
1	6528069	PLEKHG5	0.0384209	0.77	8	0.17	6	0.6	10	0.59	12	0.0015	11
2	200820862	C2orf47	0.0384531	0.0029	2	NA	NA	0.61	1	0.73	3	NA	NA
7	24843998	OSBPL3	0.0385444	0.79	4	0.0109	3	0.35	6	0.061	12	0.38	7
12	66546100	RP11-745O10.4	0.0385816	NA	NA	0.74	2	0.78	2	0.23	2	0.0022	3
17	38948714	KRT28	0.0385982	0.027	5	0.88	3	0.015	3	0.82	8	NA	NA
4	121631559	PRDM5	0.0387837	0.43	3	NA	NA	0.49	1	0.0062	4	NA	NA
12	53444007	TENC1	0.0387877	0.26	10	0.37	5	0.62	7	0.0013	12	0.91	7
4	87809025	C4orf36	0.0388126	0.48	5	0.37	2	NA	NA	0.0021	5	0.79	2
17	74072893	GALR2	0.0388244	0.00059	4	0.29	2	1	3	0.7	6	0.59	5
10	123842523	TACC2	0.0389763	0.11	26	0.025	21	0.72	25	0.133	50	0.27	30
1	150248200	C1orf54	0.039	NA	NA	NA	NA	NA	NA	0.039	1	NA	NA
3	12613842	MKRN2	0.039	0.039	3	NA	NA	NA	NA	NA	NA	NA	NA
7	48278916	ABCA13	0.039002	0.35	39	0.02	40	0.82	60	0.62	86	0.02	45
22	31500991	RP3-412A9.11	0.0390321	0.34	1	0.019	2	NA	NA	NA	NA	NA	NA
19	17000585	F2RL3	0.0390844	1	4	NA	NA	0.2	2	0.0066	7	NA	NA
15	70347482	TLE3	0.0392151	NA	NA	0.49	1	0.37	2	0.0025	4	0.66	1
17	56638900	TEX14	0.0392567	0.24	11	0.48	10	0.51	12	0.024	21	0.051	6
5	66350315	MAST4	0.0392708	0.75	10	0.88	9	0.79	11	0.0006	12	0.23	9
1	11982580	KIAA2013	0.0394954	NA	NA	0.91	2	NA	NA	0.0072	3	NA	NA
1	159273943	FCER1A	0.0395044	NA	NA	0.45	2	0.25	7	0.96	6	0.0028	5
1	114340502	RSBN1	0.0395084	NA	NA	0.39	1	0.5	1	0.0033	1	0.47	1
2	196602679	DNAH7	0.0395468	0.00086	42	0.65	22	0.44	39	0.58	70	0.51	31
11	55872832	OR8H2	0.0396148	0.26	6	NA	NA	NA	NA	0.0055	4	0.94	3
13	111367876	ING1	0.0396182	0.0067	2	0.44	5	0.22	6	0.45	6	0.25	5
17	72691263	CD300LF	0.0396799	0.74	3	0.48	3	0.39	2	0.00088	3	0.6	3
19	46176126	GIPR	0.0397435	0.22	10	0.93	2	0.004	6	0.64	8	0.14	3
3	58739528	C3orf67	0.0397772	0.00068	9	0.6	6	0.32	4	0.76	10	0.74	5
10	96094425	NOC3L	0.0397816	0.0018	5	0.75	2	0.34	5	0.25	8	0.64	5
17	424920	VPS53	0.0399306	0.0032	7	0.55	2	0.25	4	0.73	6	0.23	4
16	67572934	FAM65A	0.0399615	0.23	9	0.31	2	0.84	6	0.0019	9	0.65	5
17	31260307	TMEM98	0.04	NA	NA	NA	NA	NA	NA	0.04	2	NA	NA
1	26365751	SLC30A2	0.0400684	NA	NA	0.013	1	0.15	2	0.7	4	NA	NA
11	123777217	OR8D4	0.0400698	0.44	3	0.00031	2	0.93	3	0.96	8	0.61	4
3	149192678	TM4SF4	0.0400946	0.23	2	NA	NA	NA	NA	0.33	3	0.018	2
10	104117875	GBF1	0.0401722	0.49	10	0.27	3	0.81	8	0.24	14	0.0029	5
3	129009622	C3orf37	0.040194	0.0032	1	0.36	1	0.4	2	0.18	2	0.9	2
3	155198866	PLCH1	0.0403028	0.017	9	0.35	4	0.45	4	0.056	9	0.5	10
11	61081819	DDB1	0.040312	0.49	2	0.67	1	NA	NA	0.73	2	0.0013	2
11	64622327	EHD1	0.0403526	0.029	1	0.48	1	NA	NA	0.099	4	NA	NA
8	95390591	RAD54B	0.0403771	0.017	6	0.0086	5	0.93	8	0.79	7	0.7	8
4	122062981	TNIP3	0.0403943	0.3	5	0.2	3	NA	NA	0.023	2	NA	NA
19	43237010	PSG3	0.0404636	0.0038	4	0.52	1	NA	NA	0.7	3	NA	NA
15	101464887	LRRK1	0.0404966	0.61	13	0.43	11	0.15	14	0.003	33	0.64	15
19	51480840	KLK7	0.0405087	0.39	3	NA	NA	0.0096	1	0.37	6	NA	NA
5	150175109	C5orf62	0.0405103	NA	NA	0.25	1	0.71	1	0.0034	1	0.52	1
4	113565835	LARP7	0.0405135	0.013	3	NA	NA	0.59	3	0.066	4	0.62	2
17	8285501	RP11-849F2.7	0.0405379	NA	NA	0.26	1	NA	NA	NA	NA	0.026	1
22	20043485	C22orf25	0.0405458	0.54	3	NA	NA	0.023	1	0.23	5	0.11	1
6	36104726	MAPK13	0.0405626	0.42	2	0.82	2	0.68	3	0.00049	4	0.66	3
22	31042815	SLC35E4	0.0407085	0.95	2	0.8	3	0.96	3	0.87	5	0.00012	3
22	38481311	BAIAP2L2	0.0407311	0.12	4	0.0047	6	0.79	4	0.71	7	NA	NA
12	133586836	ZNF26	0.0409372	NA	NA	0.012	1	NA	NA	0.57	1	NA	NA
6	75797302	COL12A1	0.0411584	0.12	14	0.82	4	0.77	16	0.0093	38	0.11	18
17	79983278	LRRC45	0.0411639	0.38	4	0.024	4	0.46	5	0.084	7	0.22	5
9	35733008	CREB3	0.041516	0.006	5	0.99	4	0.083	3	0.66	5	NA	NA
6	97246356	GPR63	0.0416787	0.0077	5	0.42	1	0.11	3	0.92	4	NA	NA
2	242501852	BOK	0.0418243	0.047	2	0.14	2	0.24	3	0.053	4	0.95	3
10	32308786	KIF5B	0.0418464	0.055	4	0.28	1	0.39	3	0.025	4	0.53	1
17	56598991	2020-09-04	0.0418901	0.52	2	0.105	2	0.014	7	0.132	8	0.79	6
3	12950002	IQSEC1	0.0419413	0.0063	5	0.98	4	0.44	7	0.14	13	0.21	9
12	32260338	BICD1	0.0419435	0.066	3	0.11	2	NA	NA	0.2	3	NA	NA
8	125988712	ZNF572	0.0419957	0.094	7	0.06	1	0.11	3	0.43	10	0.3	3
19	36387149	NFKBID	0.042	0.042	1	NA	NA	NA	NA	NA	NA	NA	NA
2	27315252	KHK	0.0421394	0.55	2	0.00061	5	0.44	4	0.79	9	0.69	5
1	153390542	S100A7A	0.0421483	0.55	2	0.5	1	NA	NA	0.0022	2	0.55	1
10	69692476	HERC4	0.0423321	0.39	2	0.3	2	0.73	3	0.73	4	0.0013	3
10	43281013	BMS1	0.0424167	0.4	8	0.84	2	0.25	3	0.0088	5	0.11	3
20	62190628	RP4-697K14.7	0.0424375	0.77	40	0.11	12	0.21	24	0.61	41	0.0075	27
8	68340290	CPA6	0.0424671	0.009	5	0.035	6	0.91	5	0.29	9	0.98	2
2	102472459	MAP4K4	0.0424873	NA	NA	0.61	4	0.23	4	0.0025	10	0.96	6
10	97599508	ENTPD1	0.0425209	0.93	5	0.19	1	0.59	4	0.29	5	0.0027	3
7	127950857	RBM28	0.0426038	0.04	10	0.62	6	0.77	11	0.64	13	0.0067	7
16	85141660	FAM92B	0.0426367	0.0045	3	0.46	5	0.23	4	0.21	5	0.82	2
20	390552	RBCK1	0.0426457	0.25	4	NA	NA	0.18	3	0.033	5	NA	NA
13	61986223	PCDH20	0.0426458	0.0121	2	0.38	3	0.047	5	0.69	10	0.55	3
1	158517471	OR6Y1	0.0426899	0.31	2	0.16	5	0.91	11	0.07	15	0.026	11
7	102957397	DNAJC2	0.0427225	NA	NA	NA	NA	0.12	1	0.06	4	NA	NA
3	112724471	C3orf17	0.0427641	0.98	5	0.4	6	0.079	7	0.19	12	0.014	7
11	65408708	SIPA1	0.042866	0.17	3	0.5	4	0.76	4	0.4	7	0.0032	7
2	176948116	EVX2	0.0429969	0.12	2	0.051	2	0.4	3	0.14	3	NA	NA
19	18391285	JUND	0.043	NA	NA	NA	NA	NA	NA	0.043	1	NA	NA
19	55998262	NAT14	0.043	0.043	1	NA	NA	NA	NA	NA	NA	NA	NA
8	21847855	XPO7	0.043	0.043	2	NA	NA	NA	NA	NA	NA	NA	NA
3	127394885	ABTB1	0.0430448	0.035	4	0.67	4	0.0085	3	0.72	6	0.58	3
1	214492286	SMYD2	0.043142	0.72	2	0.0017	3	0.25	2	0.3	5	0.91	2
2	217279768	SMARCAL1	0.0431595	0.43	12	0.05	5	0.54	5	0.18	12	0.04	2
16	129470	MPG	0.043255	0.0065	6	NA	NA	0.31	3	0.22	9	0.78	5
1	55541174	USP24	0.0432806	0.49	5	0.68	6	0.012	9	0.7	16	0.03	7
14	105394082	PLD4	0.0434154	0.51	7	0.76	2	NA	NA	0.039	4	0.023	4
20	7864284	HAO1	0.0434463	0.27	6	0.21	2	0.79	2	0.023	2	0.082	3
11	68673601	IGHMBP2	0.0434536	0.24	6	0.37	6	0.013	12	0.12	16	0.61	15
9	74305020	TMEM2	0.0435073	0.084	7	0.61	3	0.51	9	0.027	11	0.12	5
1	76198337	ACADM	0.043541	0.0022	3	0.071	7	0.98	6	0.78	6	0.71	5
3	184099050	CHRD	0.0435942	0.83	5	0.16	7	0.82	4	0.039	8	0.02	5
14	45400573	KLHL28	0.0436009	0.71	5	0.27	2	0.17	1	0.0033	6	0.79	3
17	7462555	TNFSF13	0.0436672	0.0088	2	NA	NA	NA	NA	0.84	1	NA	NA
21	32492757	TIAM1	0.0437334	0.29	17	0.33	12	0.84	14	0.0059	20	0.18	15
16	15131962	NTAN1	0.0438303	0.45	2	0.74	1	0.67	3	0.12	4	0.0032	1
1	21071406	HP1BP3	0.0438958	0.38	3	NA	NA	0.31	3	0.004	3	0.75	3
3	179408054	USP13	0.043975	0.37	6	0.025	2	0.95	5	0.0121	9	0.81	4
7	295970	FAM20C	0.0439782	0.73	5	NA	NA	0.29	3	0.018	4	0.093	4
12	39096717	CPNE8	0.044	0.044	2	NA	NA	NA	NA	NA	NA	NA	NA
11	61015916	PGA4	0.044	NA	NA	0.044	2	NA	NA	NA	NA	NA	NA
1	38453330	SF3A3	0.044	NA	NA	NA	NA	NA	NA	0.044	1	NA	NA
1	32256385	SPOCD1	0.0440237	0.0061	9	0.68	4	0.32	6	0.26	13	0.25	10
12	20852547	SLCO1C1	0.0440722	0.45	5	0.38	1	0.72	4	0.0027	4	0.26	1
11	55135435	OR4A15	0.0440923	0.61	6	NA	NA	0.2	4	0.0036	9	0.81	5
1	11906068	NPPA	0.0441964	NA	NA	NA	NA	0.3	1	0.025	2	NA	NA
9	32541740	TOPORS	0.0442597	0.112	3	0.109	5	0.22	6	0.27	12	0.12	7
5	83360520	EDIL3	0.0443533	0.37	2	0.0018	3	0.92	4	0.19	5	0.75	2
10	116008464	VWA2	0.0443801	0.02	17	0.074	3	0.74	8	0.19	16	0.42	8
21	47918578	DIP2A	0.0444052	0.53	12	0.94	5	0.0048	12	0.59	25	0.062	13
8	91094898	CALB1	0.0445243	NA	NA	NA	NA	0.032	1	0.41	1	0.12	1
10	93811989	CPEB3	0.0445673	0.00073	3	0.56	2	0.59	4	0.76	5	0.48	4
15	43568715	TGM7	0.0446236	0.8	9	0.54	5	0.0049	8	0.119	12	0.35	9
19	57764519	ZNF805	0.0446896	0.97	2	0.17	2	0.28	2	0.0022	3	0.87	2
3	127292425	TPRA1	0.0447941	0.008	7	0.33	2	0.28	5	0.24	8	0.5	5
10	135098641	TUBGCP2	0.0448121	0.0057	7	0.083	3	0.88	11	0.82	21	0.26	9
1	23191502	EPHB2	0.0448745	0.77	4	0.7	7	0.121	5	0.0031	9	0.44	6
11	125325904	FEZ1	0.0449922	0.0079	4	NA	NA	NA	NA	0.97	2	NA	NA
19	49079224	SULT2B1	0.0449981	0.82	7	0.69	4	0.47	6	0.016	7	0.021	3
19	49926464	PTH2	0.045	NA	NA	0.045	2	NA	NA	NA	NA	NA	NA
3	42448377	LYZL4	0.0450428	0.86	3	0.0133	3	0.58	2	0.019	2	0.71	2
6	32411210	HLA-DRA	0.0450561	1	1	0.04	4	NA	NA	0.04	2	NA	NA
11	66032649	KLC2	0.0450603	0.053	1	0.012	1	0.88	3	0.16	2	1	3
4	84216580	HPSE	0.0451012	0.013	4	0.93	2	0.64	6	0.061	9	0.19	6
19	18285944	IFI30	0.0451447	NA	NA	0.055	1	0.29	3	0.11	5	0.21	1
4	83860883	LIN54	0.0452398	0.05	1	NA	NA	0.55	2	0.048	1	0.28	3
3	186383945	HRG	0.0452725	0.6	6	0.0045	6	0.053	10	0.65	20	0.97	13
6	158735296	TULP4	0.0452771	0.0014	21	0.84	10	0.21	14	0.58	27	0.63	13
9	136501530	DBH	0.0453102	0.56	15	0.97	13	0.008	15	0.033	20	0.63	18
1	109322026	STXBP3	0.0453717	0.65	2	NA	NA	NA	NA	0.35	3	0.0071	1
2	235943693	SH3BP4	0.0453904	0.029	8	0.3	5	0.019	10	0.87	16	0.63	9
2	11332408	ROCK2	0.0454047	NA	NA	0.046	2	0.024	8	0.34	9	0.99	7
20	62576034	UCKL1	0.045469	0.46	4	0.019	2	0.15	5	0.11	5	0.63	1
15	41245731	CHAC1	0.0455424	0.014	5	0.64	3	0.34	6	0.13	6	0.23	3
7	33217156	BBS9	0.0455787	0.087	5	0.14	3	0.26	7	0.16	19	0.18	8
1	16069071	TMEM82	0.0456361	0.83	7	0.44	4	0.17	9	0.23	10	0.0064	8
22	26884039	SRRD	0.0457172	0.34	1	0.024	1	NA	NA	0.2	3	NA	NA
9	114304164	ZNF483	0.0457172	0.04	3	NA	NA	NA	NA	0.24	5	0.17	3
4	25664381	SLC34A2	0.0457549	0.65	6	0.19	4	0.51	7	0.47	9	0.0031	8
14	93649549	MOAP1	0.0458269	0.85	7	0.048	4	0.43	4	0.0076	5	0.69	6
13	43148653	TNFSF11	0.0458888	NA	NA	0.11	3	0.05	1	0.078	2	0.88	3
1	100174455	FRRS1	0.0459062	0.002	7	0.4	3	0.2	4	0.62	10	0.93	4
11	57068494	TNKS1BP1	0.0459607	0.31	12	0.72	8	0.56	16	0.0087	24	0.085	14
9	115932012	FKBP15	0.0459912	0.46	7	0.83	5	0.022	2	0.0136	10	0.81	1
3	32994957	CCR4	0.046	0.046	2	NA	NA	NA	NA	NA	NA	NA	NA
22	31328563	MORC2	0.046006	0.33	3	0.058	1	NA	NA	0.086	7	NA	NA
6	96974210	UFL1	0.0461532	0.99	4	0.00019	2	0.75	1	0.97	11	0.68	5
18	22048821	HRH4	0.0461698	0.83	3	NA	NA	0.9	1	0.03	5	0.017	3
6	40996173	UNC5CL	0.0462451	0.13	7	0.51	7	0.44	5	0.0032	10	1	7
7	102462523	FBXL13	0.0462725	0.049	10	0.041	1	0.99	5	0.054	14	0.87	7
5	16177949	2020-03-11	0.0462882	NA	NA	0.61	1	NA	NA	0.013	1	NA	NA
18	618067	CLUL1	0.0462882	NA	NA	NA	NA	0.13	3	0.061	6	NA	NA
16	66942330	CDH16	0.0463301	0.89	6	0.69	2	0.0022	10	0.63	17	0.11	7
11	74700170	NEU3	0.0463796	0.12	6	0.025	2	0.11	1	0.49	2	0.58	3
11	65307852	LTBP3	0.0463845	0.44	3	0.97	4	0.66	1	0.37	7	0.0009	4
7	20406754	ITGB8	0.0465281	0.77	6	NA	NA	0.026	2	0.77	3	0.025	1
9	95263010	ECM2	0.0466509	0.14	4	0.28	8	0.23	9	0.07	15	0.15	9
1	118042131	MAN1A2	0.0467013	0.96	3	0.007	1	NA	NA	0.25	2	NA	NA
1	145704167	CD160	0.0469191	0.71	2	0.2	2	0.89	1	0.0018	2	0.42	1
19	19760645	ATP13A1	0.0469454	0.27	6	0.43	5	0.044	8	0.26	12	0.072	5
13	114077172	ADPRHL1	0.0469604	0.76	5	0.76	1	0.087	2	0.0056	5	0.34	3
1	39325136	RRAGC	0.047	NA	NA	0.047	1	NA	NA	NA	NA	NA	NA
15	94841430	MCTP2	0.0470589	0.68	15	0.0012	6	0.36	6	0.43	17	0.76	5
8	27880851	NUGGC	0.0470942	0.0019	7	0.58	3	0.89	8	0.35	17	0.28	9
19	37618045	ZNF420	0.0471087	0.045	4	NA	NA	NA	NA	0.18	2	NA	NA
8	10464405	RP1L1	0.047118	0.0055	36	0.56	22	0.08	31	0.61	56	0.64	27
19	44341340	ZNF283	0.0471445	NA	NA	0.39	1	0.039	5	0.68	7	0.038	5
6	43469358	TJAP1	0.0472211	0.035	3	0.85	4	0.32	3	0.039	4	0.26	4
16	56899228	SLC12A3	0.0474542	0.0096	12	0.79	96	0.058	12	0.79	21	0.28	10
1	154184993	C1orf43	0.0474552	0.84	2	NA	NA	0.42	1	0.0025	2	0.45	2
19	17735631	UNC13A	0.0474851	0.0032	7	0.18	5	0.2	5	0.89	8	0.95	4
1	57333311	C8A	0.0475027	0.95	7	0.36	3	0.23	7	0.0021	10	0.59	10
17	43332648	TEX34	0.04756	0.0138	1	NA	NA	0.52	2	0.24	4	NA	NA
12	48596127	OR10AD1	0.0477391	0.98	5	0.108	1	0.0035	4	0.34	7	0.78	2
20	44171347	SPINLW1-WFDC6	0.0477458	0.57	1	0.031	1	0.83	3	0.0067	3	1	3
20	62187231	C20orf195	0.0478154	0.49	3	0.16	3	0.016	3	0.32	5	NA	NA
5	76331419	AGGF1	0.0478476	NA	NA	0.29	3	0.0022	6	0.67	4	0.94	3
19	2290767	LINGO3	0.0478965	NA	NA	0.44	2	0.104	2	0.038	2	NA	NA
19	49206304	FUT2	0.0479204	0.16	7	0.33	9	0.52	7	0.3	8	0.012	5
12	92537956	BTG1	0.048	NA	NA	NA	NA	NA	NA	0.048	1	NA	NA
11	533553	HRAS	0.048	NA	NA	0.048	3	NA	NA	NA	NA	NA	NA
18	31538235	NOL4	0.048	NA	NA	0.048	1	NA	NA	NA	NA	NA	NA
5	42800866	SEPP1	0.0482743	0.12	5	0.75	5	0.0042	5	0.54	6	0.49	4
15	69709783	KIF23	0.0483324	0.57	8	0.39	4	0.14	5	0.7	11	0.0046	7
9	99086387	SLC35D2	0.0483772	0.015	2	0.23	2	NA	NA	0.32	4	0.37	2
9	33240217	SPINK4	0.0484227	0.55	1	0.041	3	0.38	3	0.017	3	0.69	3
20	42233658	IFT52	0.0484234	0.0029	5	0.32	2	0.58	3	0.76	5	NA	NA
8	144650059	C8orf73	0.0484489	0.5	4	0.69	5	0.00135	5	0.6	11	0.36	4
12	94702659	CCDC41	0.0484895	0.54	2	0.44	3	0.86	8	0.0017	13	0.29	3
1	85020803	CTBS	0.0485114	0.49	3	0.014	2	0.15	6	0.101	5	0.97	5
2	58390589	FANCL	0.0485732	0.18	4	0.17	1	0.79	3	0.017	5	NA	NA
3	122629701	SEMA5B	0.0486036	0.0032	6	0.25	4	0.64	7	0.79	8	0.25	8
1	180217566	LHX4	0.0486674	0.18	2	0.059	2	0.019	3	0.54	5	0.93	2
20	47855830	ZNFX1	0.0489085	0.03	17	0.056	10	0.19	17	0.4	25	0.8	17
13	114321711	GRK1	0.0489877	0.82	12	0.0012	2	0.59	5	0.84	9	0.21	5
3	69075245	TMF1	0.0489952	0.0027	7	0.52	5	0.4	5	0.48	12	0.38	5
6	55142337	HCRTR2	0.0490698	0.0017	1	0.28	1	0.27	3	0.94	3	0.85	2
13	99337039	SLC15A1	0.0491307	0.092	6	0.79	6	0.013	6	0.33	11	0.33	6
19	44602030	ZNF224	0.0491742	0.046	5	0.64	1	0.35	4	0.02	12	0.5	6
7	71571137	CALN1	0.0491765	0.58	1	0.42	2	NA	NA	0.0074	3	NA	NA
12	113633532	IQCD	0.0492058	0.69	2	0.27	4	0.19	3	0.94	5	0.0031	3
3	49947766	MON1A	0.0493396	0.92	2	0.016	1	0.69	3	0.3	4	0.034	1
12	11061122	TAS2R13	0.0494827	0.0194	3	0.12	1	0.33	1	0.55	3	NA	NA
18	31319293	ASXL3	0.049563	0.031	12	0.77	5	0.57	11	0.59	19	0.013	9
1	180971756	STX6	0.049602	0.032	1	NA	NA	0.38	2	0.15	5	NA	NA
1	27190149	SFN	0.0496489	NA	NA	0.063	2	NA	NA	0.137	2	NA	NA
13	80095030	NDFIP2	0.0497296	0.92	3	0.024	1	0.24	2	0.11	2	0.18	1
6	35762937	CLPS	0.0498617	0.032	3	NA	NA	0.42	1	0.3	2	0.106	3
15	64791959	ZNF609	0.0499056	0.033	5	0.11	2	0.17	6	0.9	9	0.19	5
14	23816759	SLC22A17	0.049914	0.24	2	NA	NA	0.098	1	0.35	2	0.052	2
1	158532605	OR6P1	0.049923	0.98	8	0.22	5	0.014	9	0.053	14	0.66	6
19	49979789	FLT3LG	0.049938	0.46	2	NA	NA	0.58	2	NA	NA	0.0069	2
12	8374646	FAM90A1	0.05	NA	NA	0.05	3	NA	NA	NA	NA	NA	NA
17	42395568	RUNDC3A	0.05	0.05	2	NA	NA	NA	NA	NA	NA	NA	NA
2	202245423	TRAK2	0.0500101	0.018	4	NA	NA	0.18	6	0.25	8	0.53	4
8	37688966	GPR124	0.0500711	0.069	10	0.64	6	0.44	12	0.021	16	0.26	8
6	117609716	ROS1	0.0501262	0.019	27	0.95	9	0.16	24	0.16	43	0.23	20
4	24810093	CCDC149	0.0501747	0.2	1	0.96	1	0.99	5	0.35	4	0.0016	3
6	18161646	KDM1B	0.050227	0.0016	6	0.28	1	0.35	4	1	6	0.68	2
21	37444517	CBR1	0.0504827	NA	NA	0.037	3	0.31	5	0.052	4	0.73	4
1	92428316	BRDT	0.0505017	0.6	6	0.4	5	0.006	4	0.09	7	0.83	3
5	74842875	POLK	0.0505034	0.16	7	0.06	4	0.29	7	0.046	10	0.84	7
6	5368824	FARS2	0.0505315	0.89	7	0.0015	2	0.47	2	0.66	6	0.26	3
6	155450580	TIAM2	0.0505704	0.65	23	0.053	15	0.61	19	0.19	34	0.027	19
9	130476383	PTRH1	0.0506204	0.24	5	NA	NA	0.023	3	0.72	3	0.11	2
8	67341714	RRS1	0.0506394	0.97	5	0.51	6	0.39	5	0.016	7	0.035	5
1	213146292	VASH2	0.0506394	0.97	2	0.021	1	0.6	1	0.013	3	0.68	1
4	76785641	PPEF2	0.0507668	0.61	12	0.12	7	0.19	9	0.012	16	0.65	8
17	33802156	SLFN12L	0.050935	0.77	3	0.43	3	0.18	2	0.0061	5	0.3	3
10	104632301	AS3MT	0.0509598	0.0082	1	0.17	4	0.29	4	0.5	6	0.54	5
3	14170981	TMEM43	0.0510455	0.99	9	0.038	1	0.0044	6	0.76	8	0.87	1
1	183184650	LAMC2	0.0510592	0.0024	18	0.72	13	0.23	14	0.29	18	0.95	16
1	156496297	IQGAP3	0.0511536	0.71	16	0.46	10	0.46	11	0.017	29	0.043	11
1	212798251	FAM71A	0.0512199	0.077	8	0.082	4	0.83	6	0.7	11	0.03	3
20	54823993	MC3R	0.0512202	0.83	1	0.42	4	NA	NA	0.0111	4	0.115	3
2	135095857	MGAT5	0.0512369	0.0031	3	0.37	1	0.64	3	0.2	5	0.75	4
19	30164754	PLEKHF1	0.0513423	0.046	4	NA	NA	0.63	2	0.067	3	0.23	4
19	41003435	SPTBN4	0.0514676	0.25	11	0.79	4	0.016	8	0.27	11	0.13	4
20	3739299	C20orf27	0.0515738	0.04	1	0.37	1	NA	NA	0.13	1	NA	NA
10	101544428	ABCC2	0.0516204	0.39	22	0.14	22	0.36	14	0.27	27	0.021	21
4	13571720	BOD1L1	0.0516669	0.048	38	0.0056	7	0.72	21	0.79	35	0.73	15
22	45683200	UPK3A	0.0517837	0.87	4	0.0029	2	0.75	5	0.37	10	0.16	4
17	18874965	FAM83G	0.0518016	0.49	6	0.31	5	0.26	9	0.0033	13	0.86	7
1	38034571	GNL2	0.0518192	0.56	3	0.31	4	0.2	7	0.0038	15	0.85	3
1	169695870	SELE	0.0518398	0.94	6	0.77	2	0.012	5	0.068	9	0.19	3
3	25635127	RARB	0.0518653	NA	NA	NA	NA	0.26	1	0.035	1	NA	NA
12	7187848	C1R	0.0518667	0.013	5	0.085	3	0.4	6	0.33	10	0.77	5
17	76794580	USP36	0.0518932	0.49	18	0.14	7	0.76	16	0.49	25	0.0044	13
6	20488374	E2F3	0.0518962	0.61	2	0.85	3	0.3	2	0.00099	4	0.73	3
1	95699802	RWDD3	0.0519642	0.45	1	NA	NA	0.024	2	0.18	2	NA	NA
21	47333949	PCBP3	0.052	0.052	1	NA	NA	NA	NA	NA	NA	NA	NA
6	153078248	VIP	0.052	0.052	1	NA	NA	NA	NA	NA	NA	NA	NA
10	13152400	OPTN	0.0520415	0.38	2	0.0152	15	0.19	2	0.98	4	0.105	4
11	125775454	DDX25	0.0520631	0.16	2	0.045	3	0.044	3	0.41	5	0.87	1
5	71739798	ZNF366	0.0520687	0.71	7	0.91	5	0.49	3	0.00042	7	0.85	3
9	100961704	TBC1D2	0.0521245	0.0042	11	0.36	4	0.2	10	0.48	14	0.78	9
4	184585165	TRAPPC11	0.0521392	0.48	6	0.057	4	0.12	9	0.23	19	0.15	7
1	17548837	PADI1	0.0521591	0.081	11	0.97	4	0.079	6	0.22	17	0.083	7
7	128413726	OPN1SW	0.0521762	0.046	1	0.46	2	0.77	4	0.24	6	0.029	3
7	81334818	HGF	0.0521968	0.52	3	0.11	1	0.109	3	0.02	4	0.91	3
21	34614250	IFNAR2	0.0522252	0.62	5	0.077	3	0.61	6	0.015	11	0.26	5
11	46637381	HARBI1	0.0522283	0.73	1	0.41	2	0.22	1	0.0138	5	0.125	3
5	140682543	SLC25A2	0.0523844	0.42	4	NA	NA	NA	NA	0.6	6	0.0078	1
12	49164731	ADCY6	0.0524241	0.15	6	0.0093	5	0.37	7	0.27	13	0.82	6
2	172926226	METAP1D	0.0524596	0.14	2	0.56	4	0.0024	7	0.8	7	0.76	4
4	177056356	WDR17	0.052477	0.96	6	0.46	12	0.15	17	0.054	26	0.032	16
16	12758966	CPPED1	0.0524941	0.9	6	0.43	5	0.62	7	0.43	12	0.00111	9
9	132854659	GPR107	0.0525836	0.21	3	0.041	1	0.057	3	0.39	6	0.6	2
6	160176479	WTAP	0.0525877	NA	NA	0.19	3	0.66	5	0.0052	6	0.71	2
1	52703169	ZFYVE9	0.0527354	0.57	7	0.24	8	0.19	10	0.23	21	0.0193	10
1	67507941	SLC35D1	0.0527792	0.84	2	0.00059	3	0.94	3	0.31	5	0.8	3
14	64867537	MTHFD1	0.0528062	0.0042	2	0.42	2	0.5	6	0.19	9	0.69	3
20	44171347	EPPIN	0.0528582	0.57	1	0.034	1	0.83	3	0.0072	3	1	3
17	2290850	MNT	0.0529117	0.06	1	NA	NA	0.11	2	0.12	3	0.59	1
11	76853783	MYO7A	0.0529366	0.048	16	0.034	23	0.38	27	0.26	40	0.72	17
18	5890777	TMEM200C	0.0529888	0.16	3	0.052	1	NA	NA	0.24	2	NA	NA
4	175413228	HPGD	0.052998	0.73	5	NA	NA	NA	NA	0.0072	3	0.38	3
7	110526714	IMMP2L	0.053	NA	NA	NA	NA	NA	NA	0.053	2	NA	NA
7	87369109	RUNDC3B	0.053	0.053	2	NA	NA	NA	NA	NA	NA	NA	NA
17	3324574	OR3A3	0.0530835	0.026	1	0.36	1	NA	NA	NA	NA	NA	NA
15	65140807	AC069368.3	0.0530858	0.089	2	0.0025	2	0.91	5	0.72	5	0.8	2
6	105563677	BVES	0.0531239	NA	NA	0.41	1	0.078	5	0.35	6	0.042	2
1	158669538	OR6K2	0.0531459	0.75	9	NA	NA	0.35	7	0.064	10	0.028	3
7	56051427	GBAS	0.0531616	0.27	1	NA	NA	0.83	3	0.015	4	0.14	3
18	9886890	TXNDC2	0.0532702	NA	NA	0.02	1	NA	NA	0.47	6	NA	NA
2	54023133	ERLEC1	0.0533371	0.0072	4	0.17	1	0.56	5	0.69	7	NA	NA
1	214537946	PTPN14	0.0533396	0.53	11	0.033	9	0.5	12	0.014	20	0.96	12
14	105957446	C14orf80	0.0533509	0.6	9	0.36	4	0.16	5	0.81	13	0.0042	7
4	108816980	SGMS2	0.0533822	0.124	2	NA	NA	NA	NA	0.076	5	NA	NA
6	47675014	GPR115	0.0534056	0.13	16	0.74	1	0.039	8	0.043	21	0.73	7
19	18876258	CRTC1	0.0535501	0.22	1	0.043	1	NA	NA	NA	NA	NA	NA
4	72215759	SLC4A4	0.0535561	0.014	7	0.48	7	0.97	6	0.55	13	0.033	8
7	150553605	ABP1	0.0535926	0.002	8	0.56	3	0.94	5	0.75	15	0.15	7
11	64883976	ZNHIT2	0.0535986	0.37	4	0.101	1	0.76	4	0.0043	6	0.97	4
1	155039849	EFNA4	0.0536501	0.18	2	0.047	1	0.087	5	0.26	5	0.62	2
17	40841014	CNTNAP1	0.0537258	0.52	7	0.054	3	0.55	5	0.035	9	0.22	5
19	35448868	ZNF792	0.0537678	0.9	8	0.75	3	0.00084	3	0.35	10	0.6	6
17	292997	FAM101B	0.0538537	NA	NA	0.91	3	0.66	2	0.47	3	0.0017	3
20	42142225	L3MBTL1	0.0539771	0.93	3	0.64	4	0.00039	7	0.58	10	0.89	7
19	12848342	ASNA1	0.054	NA	NA	NA	NA	NA	NA	0.054	2	NA	NA
7	86795802	DMTF1	0.0540628	0.104	8	0.0098	2	NA	NA	0.64	3	0.74	2
10	12940631	CCDC3	0.0540869	NA	NA	0.23	1	0.19	1	0.047	4	NA	NA
1	43021868	CCDC30	0.0541623	0.28	3	0.4	2	0.82	3	0.0041	7	0.32	4
11	32413538	WT1	0.0542015	NA	NA	0.8	12	NA	NA	0.012	1	NA	NA
11	56431216	OR5AR1	0.0544263	0.068	4	NA	NA	0.037	4	0.51	6	0.38	4
11	65810612	GAL3ST3	0.0544605	0.041	3	0.31	1	0.3	1	0.128	4	NA	NA
7	73513529	LIMK1	0.0545666	0.21	3	NA	NA	NA	NA	0.045	6	0.22	1
18	6948489	LAMA1	0.0545984	0.11	31	0.57	25	0.0059	33	0.33	52	1	25
1	44446937	B4GALT2	0.0547503	0.21	2	0.82	2	0.0078	3	0.11	4	0.83	2
19	56934489	ZNF583	0.0547583	0.27	1	NA	NA	NA	NA	0.036	2	NA	NA
1	70819679	ANKRD13C	0.0547995	NA	NA	0.34	1	0.15	2	0.042	2	0.23	2
1	24124208	GALE	0.0548066	0.012	2	0.83	2	NA	NA	0.21	2	NA	NA
19	44833851	CTC-512J12.6	0.0548942	NA	NA	0.92	1	0.065	1	0.014	2	0.59	1
1	235860421	LYST	0.0549592	0.044	20	0.41	16	0.075	20	0.24	40	0.38	16
22	50962300	SCO2	0.0549653	0.046	2	0.53	5	0.07	2	0.29	6	NA	NA
10	89516651	ATAD1	0.0549664	NA	NA	NA	NA	0.21	2	0.05	2	0.2	1
15	65345387	SLC51B	0.055	NA	NA	NA	NA	NA	NA	0.055	3	NA	NA
16	31765105	ZNF720	0.055	NA	NA	NA	NA	NA	NA	0.055	1	NA	NA
20	9538335	PAK7	0.0551754	0.014	1	0.014	3	0.88	5	1	8	0.72	5
11	4608061	OR52I2	0.055406	0.68	3	NA	NA	NA	NA	0.0145	2	NA	NA
7	107399213	CBLL1	0.0554445	NA	NA	NA	NA	0.69	1	0.22	1	0.014	1
1	40874410	SMAP2	0.0555455	NA	NA	0.0122	3	0.46	3	0.14	6	0.64	4
17	33448818	FNDC8	0.0555557	NA	NA	0.47	2	0.98	4	0.28	9	0.0039	3
11	68747507	MRGPRD	0.0555839	0.71	7	0.27	1	0.0015	3	0.47	7	0.93	5
10	103825747	HPS6	0.0556305	NA	NA	0.4	1	0.14	4	0.12	6	0.075	4
6	73951389	KHDC1	0.0556607	0.16	2	0.15	2	0.81	3	0.27	6	0.024	3
11	58189975	OR5B2	0.0557705	0.002	6	0.68	3	NA	NA	0.93	5	0.4	3
21	42694870	FAM3B	0.0557758	0.93	3	NA	NA	NA	NA	0.24	5	0.0096	3
19	38827960	CATSPERG	0.055826	0.00024	4	0.82	8	0.73	8	0.89	13	0.99	10
16	31447140	ZNF843	0.0558292	0.047	3	0.55	1	NA	NA	0.083	1	NA	NA
8	121554213	SNTB1	0.0558833	0.0075	5	0.47	2	0.44	5	0.109	8	0.75	4
1	200943861	KIF21B	0.0559114	0.33	5	0.15	3	0.58	7	0.26	10	0.017	4
8	146066746	ZNF7	0.0559125	0.00081	2	0.95	1	1	1	0.66	2	NA	NA
1	158576394	OR10Z1	0.0559365	0.022	4	0.11	1	1	4	0.21	6	NA	NA
6	46133282	ENPP5	0.055938	0.017	6	0.115	4	0.8	4	0.58	9	0.14	5
12	65122781	GNS	0.056	0.056	1	NA	NA	NA	NA	NA	NA	NA	NA
1	18554424	IGSF21	0.0560274	0.27	7	0.76	4	0.84	6	0.00083	8	0.89	4
19	54973280	LENG9	0.0560342	0.27	3	0.32	3	0.88	8	0.0025	6	0.67	3
1	249211096	PGBD2	0.0560502	0.15	4	0.11	5	0.99	5	0.39	8	0.02	3
19	49113161	FAM83E	0.0561295	0.022	3	0.38	4	0.19	6	0.67	11	0.12	6
10	5541183	CALML5	0.0561544	NA	NA	0.15	1	0.2	2	0.71	3	0.024	2
6	125397891	RNF217	0.0563304	0.64	1	0.77	2	0.0059	2	0.94	3	0.047	2
9	214517	C9orf66	0.05638	0.47	3	0.92	7	0.025	2	0.014	4	0.85	2
4	7062894	GRPEL1	0.0564198	0.14	4	NA	NA	NA	NA	0.072	3	NA	NA
16	61689453	CDH8	0.0564856	0.6	4	0.27	6	0.59	4	0.5	9	0.0027	4
1	20978996	DDOST	0.0565351	0.51	4	0.51	6	0.12	4	0.0045	10	0.92	5
19	15052665	OR7C2	0.056607	0.96	2	0.0034	1	NA	NA	0.67	5	NA	NA
11	111808278	DIXDC1	0.0568526	0.74	7	0.9	3	0.00074	4	0.98	11	0.27	3
7	142983295	TMEM139	0.0569186	0.019	2	0.19	3	0.65	3	0.096	4	0.58	2
19	20728636	ZNF737	0.0569707	0.102	2	NA	NA	NA	NA	0.1	1	NA	NA
2	27549562	GTF3C2	0.0569868	0.0086	2	0.59	1	0.2	2	0.86	5	0.15	3
19	45593478	GEMIN7	0.057	0.057	2	NA	NA	NA	NA	NA	NA	NA	NA
12	31944944	H3F3C	0.057	NA	NA	NA	NA	NA	NA	0.057	2	NA	NA
10	118960781	KCNK18	0.0571727	0.16	5	NA	NA	0.48	1	0.018	5	0.38	1
1	162351741	C1orf226	0.0572175	0.89	3	NA	NA	0.067	1	0.49	1	0.018	2
8	27320887	CHRNA2	0.0572727	0.9	2	0.67	3	0.16	2	0.18	4	0.0076	3
17	42786711	DBF4B	0.0574162	1	4	NA	NA	0.91	4	0.0007	7	0.83	5
19	39689877	NCCRP1	0.0576575	NA	NA	NA	NA	0.0115	2	0.9	6	NA	NA
19	8131003	FBN3	0.0576737	0.15	53	0.2	21	0.25	40	0.02	71	0.89	32
3	47098405	SETD2	0.057779	0.66	7	0.078	6	0.015	11	0.51	18	0.34	11
19	58477955	C19orf18	0.0577956	0.74	2	0.79	1	0.48	2	0.00077	3	0.62	2
5	156769905	FNDC9	0.0579534	0.9	6	0.31	3	0.35	5	0.26	11	0.0053	5
1	6592800	NOL9	0.0579948	0.12	2	0.0072	2	0.33	2	0.75	5	0.63	4
16	30036680	FAM57B	0.058	0.058	1	NA	NA	NA	NA	NA	NA	NA	NA
1	93426938	FAM69A	0.058	NA	NA	0.058	1	NA	NA	NA	NA	NA	NA
17	42030502	PYY	0.058	0.058	1	NA	NA	NA	NA	NA	NA	NA	NA
7	141137475	TMEM178B	0.058	NA	NA	NA	NA	NA	NA	0.058	1	NA	NA
5	158702232	UBLCP1	0.058	NA	NA	NA	NA	NA	NA	0.058	2	NA	NA
2	219206292	PNKD	0.0580414	0.66	2	0.79	4	0.0077	3	0.24	9	0.14	5
17	15942832	NCOR1	0.0580748	0.56	9	0.23	7	0.91	7	0.64	13	0.0018	6
1	153507176	S100A6	0.0581641	NA	NA	NA	NA	0.6	3	0.44	5	0.0086	1
7	99688952	COPS6	0.0582211	NA	NA	0.9	1	0.003	1	0.8	1	0.25	1
22	44276743	PNPLA5	0.0582331	0.76	10	0.052	3	0.58	5	0.97	10	0.0061	5
16	31099000	RP11-196G11.1	0.0582892	0.35	1	0.0042	2	NA	NA	0.4	2	0.92	2
3	138218956	CEP70	0.058362	0.44	2	0.35	4	0.61	5	0.21	9	0.0069	5
16	4733253	MGRN1	0.0583939	0.0045	3	0.53	1	0.98	2	0.067	4	0.87	2
4	90169025	GPRIN3	0.0584606	0.89	10	0.101	3	0.74	9	0.0076	21	0.27	8
10	3180227	PITRM1	0.0585086	0.015	10	0.04	6	0.68	11	0.5	23	0.67	11
12	132466836	EP400	0.0586479	0.004	16	0.9	12	0.45	17	0.77	34	0.11	17
11	540719	LRRC56	0.0587045	0.47	7	0.012	6	0.44	10	0.078	11	0.71	10
4	77184997	STBD1	0.0587853	0.06	3	NA	NA	0.24	5	0.16	6	NA	NA
6	31627273	C6orf47	0.058835	0.15	1	0.41	5	0.0063	4	0.89	5	0.4	5
1	151131470	TNFAIP8L2	0.0589128	0.0042	2	0.25	1	0.77	2	0.68	2	NA	NA
5	68485592	CENPH	0.0589358	0.13	3	0.19	2	0.028	1	1	2	0.2	1
13	78130042	SCEL	0.0591439	0.0016	3	0.31	1	0.62	5	0.58	10	0.78	4
12	73015443	TRHDE	0.0591549	0.4	2	0.00104	1	0.81	3	0.59	5	0.7	4
19	4262082	CCDC94	0.0592094	0.36	2	0.0101	2	NA	NA	0.64	2	NA	NA
14	21424241	RNASE2	0.0592592	0.098	2	0.23	4	0.045	1	0.16	2	0.86	2
15	83328439	AP3B2	0.0592752	0.65	4	NA	NA	0.0017	3	0.54	8	0.93	3
1	41482976	SLFNL1	0.0593848	0.83	4	0.81	7	0.96	8	0.062	13	0.0035	5
21	38865433	DYRK1A	0.0594621	NA	NA	0.77	1	0.016	1	0.19	3	NA	NA
2	31560571	XDH	0.0594739	0.13	17	0.52	11	0.86	24	0.0035	37	0.69	24
8	98831434	LAPTM4B	0.0594962	0.74	1	0.61	1	0.39	1	0.0019	3	0.42	2
21	45553596	C21orf33	0.059691	0.13	4	0.2	3	0.77	3	0.0083	3	0.85	2
6	131466445	AKAP7	0.0597496	0.43	4	0.36	3	0.44	3	0.0031	10	0.67	4
17	4849268	PFN1	0.0598405	NA	NA	NA	NA	NA	NA	0.019	2	0.57	1
12	11091181	TAS2R14	0.0598519	0.76	4	NA	NA	0.84	2	0.0037	5	NA	NA
14	36946277	SFTA3	0.0598848	0.012	2	0.14	1	0.55	1	0.61	1	NA	NA
3	30769819	GADL1	0.0599113	0.152	6	0.57	2	0.71	2	0.021	5	0.11	2
6	44081630	MRPL14	0.06	0.06	1	NA	NA	NA	NA	NA	NA	NA	NA
8	70980738	PRDM14	0.060062	NA	NA	0.95	2	0.21	3	0.66	3	0.0043	2
1	32635611	KPNA6	0.0601118	0.033	1	0.33	1	NA	NA	NA	NA	NA	NA
2	152138493	NMI	0.0601669	0.14	1	0.65	2	0.63	2	0.64	4	0.0039	2
16	2089944	NTHL1	0.060203	0.012	4	0.29	5	0.24	3	0.35	6	0.49	4
8	10530218	C8orf74	0.0602862	0.83	3	0.017	3	0.57	4	0.35	3	0.051	6
12	58197169	AVIL	0.0603544	0.98	10	0.28	2	0.24	7	0.39	17	0.0056	6
15	64980951	OAZ2	0.0603777	NA	NA	0.01	1	0.16	1	0.41	1	0.87	1
3	157271056	C3orf55	0.0605115	0.34	3	0.086	2	0.19	3	1	4	0.026	2
17	66246416	AMZ2	0.060544	0.98	6	0.31	3	NA	NA	0.0079	3	NA	NA
1	45166683	C1orf228	0.0607408	NA	NA	0.22	2	0.55	3	0.014	2	0.34	2
4	102117083	PPP3CA	0.0608338	NA	NA	0.065	1	NA	NA	0.17	3	NA	NA
19	52468292	ZNF350	0.0609063	0.85	7	0.038	3	0.78	7	0.95	10	0.0061	6
19	49867899	DKKL1	0.0609215	0.036	3	0.18	2	0.23	3	0.49	1	0.2	4
3	47539870	ELP6	0.0610525	NA	NA	0.63	3	0.047	3	0.082	5	NA	NA
9	139089436	LHX3	0.061197	NA	NA	0.87	2	0.2	1	0.014	2	NA	NA
15	75108636	LMAN1L	0.0613475	0.36	5	0.016	1	0.054	5	0.5	7	0.95	6
19	2211146	DOT1L	0.0614218	0.98	1	0.28	4	0.83	4	0.0026	4	0.25	2
7	76019476	SRCRB4D	0.0615533	0.91	3	0.14	4	0.39	5	0.13	4	0.023	4
12	54394284	HOXC9	0.0615984	NA	NA	0.34	2	NA	NA	0.033	1	NA	NA
12	122150860	TMEM120B	0.0616739	0.033	1	0.11	1	0.58	2	NA	NA	0.28	1
14	90429749	TDP1	0.0616829	0.27	7	0.51	1	0.077	3	0.19	11	0.074	4
2	108863655	SULT1C3	0.0616844	0.035	9	0.0115	3	0.92	6	0.61	8	0.66	4
6	166572045	T	0.0617282	0.44	1	0.43	1	0.3	1	NA	NA	0.0104	2
11	124266390	OR8B3	0.0621162	0.055	3	0.43	1	NA	NA	0.9	1	0.028	1
10	12123525	DHTKD1	0.0622506	0.24	3	0.28	6	0.92	9	0.051	13	0.048	8
15	39910004	FSIP1	0.0623786	0.19	5	0.41	4	0.022	5	0.35	7	NA	NA
10	134218492	PWWP2B	0.0623967	0.96	3	0.07	2	0.19	2	0.047	2	NA	NA
1	39352271	RHBDL2	0.0625123	0.6	3	0.0034	5	0.58	4	0.23	6	0.56	4
3	88205660	C3orf38	0.0625657	0.92	2	0.00126	2	0.53	3	0.27	5	0.92	2
6	31709045	MSH5	0.0626063	0.47	6	0.00094	4	0.95	4	0.4	9	0.91	2
11	17408496	KCNJ11	0.0626959	0.39	2	0.2	20	0.025	2	0.31	3	NA	NA
11	4409718	TRIM21	0.0628365	0.99	4	0.65	3	0.77	3	0.00033	5	0.94	2
6	138539187	PBOV1	0.0628522	0.023	2	NA	NA	NA	NA	0.5	2	NA	NA
11	55761251	OR5F1	0.062915	1	3	0.52	4	0.064	3	0.089	5	0.052	5
1	2519989	FAM213B	0.063	NA	NA	NA	NA	NA	NA	0.063	2	NA	NA
18	23612484	SS18	0.063	NA	NA	NA	NA	NA	NA	0.063	2	NA	NA
4	96761317	PDHA2	0.0630285	0.083	4	0.93	2	0.64	3	0.53	10	0.0059	7
6	110501805	CDC40	0.0630471	0.21	2	NA	NA	NA	NA	0.039	1	0.31	1
6	144263042	PLAGL1	0.0631022	0.0066	2	0.12	2	0.42	4	0.99	5	0.47	3
10	16870839	CUBN	0.0631082	0.9	37	0.028	36	0.84	34	0.0103	57	0.71	26
5	102894730	NUDT12	0.0631409	0.076	3	0.39	2	0.66	4	0.036	6	0.22	3
7	89903356	C7orf63	0.0631687	0.0078	6	0.36	1	0.17	4	0.56	10	0.58	5
20	44692202	NCOA5	0.0632073	NA	NA	0.0154	2	0.24	1	0.24	3	0.69	2
17	79478236	ACTG1	0.0633429	NA	NA	NA	NA	0.27	1	0.043	1	NA	NA
12	54686186	NFE2	0.0634765	NA	NA	NA	NA	0.97	1	0.012	2	NA	NA
13	21955582	ZDHHC20	0.0635334	NA	NA	0.12	1	0.36	2	0.17	3	0.084	2
7	65548107	ASL	0.063588	0.68	2	0.013	7	0.26	3	0.22	7	0.31	3
11	62445052	UBXN1	0.0635913	0.24	4	0.84	2	0.24	2	0.018	3	0.18	2
15	74276995	STOML1	0.0636724	NA	NA	0.26	2	0.066	2	0.15	4	NA	NA
20	56227170	PMEPA1	0.0636817	0.048	2	1	2	0.62	2	0.048	2	0.11	1
1	16770235	NECAP2	0.0637367	NA	NA	0.54	2	1	3	0.0014	4	0.82	4
16	11979087	GSPT1	0.0637435	0.013	1	NA	NA	NA	NA	0.9	1	NA	NA
11	17118687	PIK3C2A	0.0637697	0.97	7	NA	NA	0.41	7	0.065	18	0.024	8
11	126162468	TIRAP	0.0639513	0.28	6	0.51	4	0.81	6	0.0072	9	0.19	3
11	8132301	RIC3	0.0639627	0.45	4	0.69	4	0.59	2	0.0016	5	0.54	2
4	57514934	HOPX	0.064	0.064	3	NA	NA	NA	NA	NA	NA	NA	NA
2	209106854	IDH1	0.064	NA	NA	NA	NA	NA	NA	0.064	2	NA	NA
6	2678571	MYLK4	0.0641627	0.0005	5	0.74	3	1	2	0.43	3	1	2
15	99646201	SYNM	0.0642861	0.087	15	0.49	13	0.13	15	0.64	23	0.045	13
12	57317649	SDR9C7	0.0642992	0.56	6	NA	NA	0.3	4	0.68	11	0.0055	3
10	99527530	SFRP5	0.0643441	0.48	2	0.018	3	0.52	4	0.14	5	NA	NA
21	38081480	SIM2	0.0643811	0.085	4	0.024	4	0.55	4	0.31	4	0.46	4
14	58896083	KIAA0586	0.0644357	0.17	13	0.016	5	0.51	14	0.15	19	0.77	15
1	89206740	PKN2	0.0645428	0.54	2	NA	NA	NA	NA	0.022	4	NA	NA
1	173155860	TNFSF4	0.0645428	NA	NA	NA	NA	0.066	1	0.18	1	NA	NA
19	16686990	MED26	0.0647062	0.32	4	0.57	3	0.78	4	0.63	10	0.0018	4
13	113669142	MCF2L	0.0647122	0.056	12	0.13	19	0.31	17	0.13	22	0.55	13
2	73476302	CCT7	0.0647242	NA	NA	NA	NA	0.057	2	0.07	2	0.66	2
18	29848028	FAM59A	0.0647912	0.62	8	0.28	4	0.19	8	0.86	15	0.0057	6
2	211060050	ACADL	0.0648406	0.96	3	NA	NA	0.025	2	0.11	5	NA	NA
5	73932199	ENC1	0.0648972	NA	NA	NA	NA	0.92	1	0.013	1	NA	NA
9	20363496	MLLT3	0.0649856	0.093	2	0.42	2	NA	NA	0.109	3	0.15	3
19	52819102	ZNF480	0.065	NA	NA	NA	NA	NA	NA	0.065	4	NA	NA
3	119301139	ADPRH	0.0650966	NA	NA	0.51	2	0.3	1	0.0045	4	0.93	2
14	55168869	SAMD4A	0.0651957	0.033	2	0.85	5	0.16	5	0.13	5	0.28	5
2	128477249	WDR33	0.0652303	0.99	3	0.0044	4	0.68	4	0.08	6	0.69	4
1	32713033	FAM167B	0.0653241	NA	NA	0.0023	1	0.98	1	0.56	1	0.51	1
17	40134398	DNAJC7	0.0654209	0.45	1	NA	NA	0.022	2	0.27	3	NA	NA
15	75893532	SNUPN	0.0654362	0.99	1	0.026	4	0.43	6	0.99	10	0.015	7
6	26240711	HIST1H4F	0.0655161	NA	NA	0.11	1	NA	NA	0.11	1	NA	NA
3	50655190	MAPKAPK3	0.0655261	NA	NA	0.28	1	0.25	1	0.21	1	0.044	1
9	138457640	PAEP	0.0655643	0.19	1	NA	NA	0.75	1	0.0059	1	0.77	1
22	21354492	THAP7	0.0656337	0.9	3	0.023	1	0.95	1	0.012	4	0.7	3
20	2840397	VPS16	0.0657282	0.105	12	0.32	6	0.16	9	0.14	12	0.22	7
10	21804386	SKIDA1	0.0657799	NA	NA	0.091	4	0.11	4	0.25	5	0.26	3
7	116770651	ST7	0.065782	NA	NA	NA	NA	0.52	1	0.014	3	0.37	2
20	34055194	CEP250	0.0657876	0.19	22	0.22	3	0.57	9	0.58	30	0.012	10
11	113194069	TTC12	0.0658596	0.38	9	0.66	4	0.023	7	0.24	18	0.12	5
3	44607013	ZNF167	0.0659211	0.0027	6	NA	NA	0.46	3	0.73	4	0.72	2
4	68691524	TMPRSS11D	0.0659938	0.0044	3	0.34	4	0.93	2	0.47	4	NA	NA
22	50706277	MAPK11	0.066	0.066	1	NA	NA	NA	NA	NA	NA	NA	NA
1	177247854	FAM5B	0.0660495	1	3	NA	NA	0.015	5	0.045	10	0.97	4
18	34156497	FHOD3	0.066117	0.65	11	0.3	6	0.52	10	0.0017	15	0.97	7
7	100850890	PLOD3	0.0661598	0.21	8	0.69	1	0.38	7	0.19	14	0.016	8
10	74096378	DNAJB12	0.0662127	0.83	3	0.0093	2	0.47	4	0.14	5	0.33	3
1	110029665	ATXN7L2	0.0662444	0.63	3	0.03	1	0.87	2	0.04	5	NA	NA
15	34159749	AVEN	0.0662929	0.5	4	0.044	1	NA	NA	0.73	3	0.041	5
14	42360932	LRFN5	0.0663482	0.56	1	0.89	2	0.0012	2	0.76	4	0.37	1
6	31709045	MSH5-SAPCD1	0.0665492	0.47	6	0.00104	4	0.95	4	0.4	9	0.91	2
3	97664725	MINA	0.0665811	0.29	7	0.41	2	0.026	5	0.072	9	0.76	5
14	37135675	PAX9	0.0665988	0.62	1	0.034	2	NA	NA	0.13	4	NA	NA
16	319511	RGS11	0.0666753	0.096	5	0.016	10	0.38	7	0.35	12	0.83	8
4	119947922	SYNPO2	0.0666986	0.71	11	0.0054	3	0.44	10	0.113	17	0.89	12
9	96398726	PHF2	0.0667771	0.04	4	0.28	4	0.096	6	0.17	10	0.93	2
1	41473203	CTPS1	0.0669245	0.018	2	0.69	1	NA	NA	NA	NA	NA	NA
7	27934904	JAZF1	0.0669715	0.15	1	0.49	1	0.07	1	0.13	1	NA	NA
11	5221008	OR51V1	0.067036	0.72	4	0.052	3	0.112	7	0.48	10	0.085	7
15	75122525	CPLX3	0.0670506	NA	NA	0.056	1	0.26	1	0.19	3	NA	NA
20	43547597	PABPC1L	0.0671295	0.95	4	0.87	5	0.028	8	0.65	11	0.0114	5
1	166826838	TADA1	0.0671774	0.46	1	0.01	1	0.87	2	0.11	3	0.39	1
11	108380449	EXPH5	0.067304	0.92	22	0.12	9	0.13	19	0.04	42	0.3	21
17	4058111	CYB5D2	0.0673223	0.5	2	0.94	1	0.094	2	0.5	7	0.0078	4
2	153417503	FMNL2	0.0674001	0.86	3	0.34	4	0.41	6	0.96	12	0.0015	4
6	29080041	OR2J3	0.0674149	0.13	2	0.021	2	NA	NA	0.99	1	0.25	1
5	176734647	MXD3	0.0674624	0.66	1	0.062	1	NA	NA	0.057	3	0.29	2
1	203465273	OPTC	0.0674799	0.0036	6	0.52	3	0.56	5	0.25	10	0.66	7
17	38547868	TOP2A	0.0674942	0.99	4	0.38	5	0.0076	6	0.089	7	0.68	5
12	124815439	NCOR2	0.0675026	0.073	13	0.016	5	0.42	22	0.56	27	0.63	20
7	143792300	OR2A12	0.0675618	0.62	5	0.48	1	0.7	1	0.32	3	0.0026	3
15	91482980	UNC45A	0.0676071	0.016	4	0.23	6	0.93	9	0.13	15	0.39	10
2	136373749	R3HDM1	0.0676386	0.056	7	0.0072	4	0.74	5	0.97	11	0.6	9
5	146658874	STK32A	0.0677131	NA	NA	NA	NA	NA	NA	0.9	3	0.014	1
9	97522373	C9orf3	0.067714	0.0029	9	0.61	2	0.65	9	0.89	13	0.17	5
19	45281492	CBLC	0.0677255	0.047	4	0.061	4	0.11	2	0.62	3	0.89	3
2	108489225	RGPD4	0.068	NA	NA	0.068	1	NA	NA	NA	NA	NA	NA
11	64514213	PYGM	0.0680615	0.85	9	0.61	11	0.24	13	0.47	18	0.003	9
3	12845013	CAND2	0.0681991	0.091	11	0.025	10	0.21	18	0.55	27	0.67	21
11	65360606	KCNK7	0.0682611	0.91	3	NA	NA	1	2	0.87	3	0.00087	2
1	11804590	AGTRAP	0.0685091	NA	NA	0.39	2	0.37	1	0.04	2	0.12	3
2	220074983	ABCB6	0.0686262	0.42	14	0.95	11	0.51	10	0.00093	18	0.94	10
17	43922640	SPPL2C	0.0686314	0.67	15	0.42	9	0.076	9	0.59	21	0.0141	13
10	23609745	C10orf67	0.0687071	NA	NA	0.16	2	0.11	1	0.059	1	0.67	1
12	10958658	TAS2R8	0.0687711	0.97	5	0.79	5	0.013	4	0.64	5	0.028	3
1	231401099	GNPAT	0.0688321	0.004	3	0.57	2	0.51	3	0.6	8	NA	NA
4	100229016	ADH1B	0.0688775	0.0004	3	0.87	2	0.82	5	0.98	7	0.64	6
2	158851771	UPP2	0.0690116	NA	NA	0.46	3	0.18	3	0.47	6	0.018	2
17	34391721	CCL18	0.0690231	NA	NA	NA	NA	0.0055	2	0.97	1	0.54	1
9	113066793	TXNDC8	0.0690805	0.18	3	0.58	3	0.24	2	0.028	5	NA	NA
11	66616472	PC	0.0691253	0.53	5	0.13	6	0.63	6	0.61	8	0.0068	4
5	123980107	ZNF608	0.069146	0.29	6	0.2	2	0.34	7	0.0105	10	0.87	5
19	55525818	GP6	0.0691847	0.73	7	0.19	7	0.5	3	0.2	8	0.013	2
10	12209752	NUDT5	0.0692074	NA	NA	0.0053	2	0.88	2	0.62	2	NA	NA
6	30104989	TRIM40	0.0693586	0.029	4	0.59	7	0.85	5	0.83	5	0.015	3
16	70843712	HYDIN	0.0693619	0.27	28	0.0044	22	0.67	45	0.35	59	0.65	42
7	30487951	NOD1	0.0693842	0.042	6	0.66	6	0.4	12	0.86	19	0.019	7
20	51870163	TSHZ2	0.0694533	0.67	14	0.11	6	0.76	12	0.18	19	0.018	9
4	76525532	CDKL2	0.0694565	0.05	5	NA	NA	NA	NA	0.26	6	NA	NA
11	2991124	NAP1L4	0.0694565	0.65	1	NA	NA	NA	NA	0.02	2	NA	NA
6	150157367	LRP11	0.0695076	0.61	3	0.037	1	0.64	2	0.074	6	0.17	2
6	132909837	TAAR5	0.0695187	0.55	9	0.51	7	0.12	8	0.015	9	0.36	8
13	21306070	N6AMT2	0.0695542	NA	NA	0.16	1	0.13	1	0.14	2	NA	NA
21	27840878	CYYR1	0.0695944	0.77	4	0.00035	2	0.91	2	0.99	3	0.75	1
16	10864135	FAM18A	0.0697603	0.019	2	NA	NA	NA	NA	0.27	3	0.57	3
5	154203121	C5orf4	0.0699556	0.28	2	0.58	2	0.87	2	0.0013	7	1	3
1	15495100	C1orf195	0.07	NA	NA	0.07	2	NA	NA	NA	NA	NA	NA
9	34521567	ENHO	0.07	0.07	1	NA	NA	NA	NA	NA	NA	NA	NA
5	113831758	KCNN2	0.07	0.07	1	NA	NA	NA	NA	NA	NA	NA	NA
3	170078232	SKIL	0.070004	0.11	2	0.013	2	0.38	2	0.47	4	0.72	4
6	4716016	CDYL	0.0700253	0.96	4	0.0039	3	0.13	3	0.45	4	0.84	2
14	24679877	CHMP4A	0.0700822	0.44	4	0.78	2	0.61	5	0.02	9	0.044	6
10	88414569	OPN4	0.0701679	0.017	4	0.54	3	0.72	5	0.49	6	0.057	2
17	79514028	C17orf70	0.0702976	0.013	6	0.17	6	0.15	11	0.57	15	0.98	10
9	110068823	RAD23B	0.0703235	0.12	1	NA	NA	NA	NA	0.11	2	NA	NA
17	3833680	ATP2A3	0.0703613	0.52	3	0.46	7	0.52	11	0.0021	14	0.71	10
2	165755156	SLC38A11	0.0703718	0.73	5	0.18	2	0.99	3	0.046	7	0.031	2
12	132323184	MMP17	0.0704087	0.27	3	0.058	4	0.13	9	0.16	12	0.57	8
11	12785856	TEAD1	0.0705398	0.053	2	NA	NA	NA	NA	0.25	3	NA	NA
4	120166520	USP53	0.070571	0.71	8	0.062	5	0.073	8	0.2	13	0.29	8
12	75900262	KRR1	0.070583	0.034	3	NA	NA	NA	NA	0.39	1	NA	NA
19	57174993	ZNF835	0.0706404	NA	NA	0.95	4	0.52	1	0.35	1	0.0042	1
3	119101206	ARHGAP31	0.0706539	0.16	10	0.77	3	0.44	6	0.65	18	0.0053	8
5	65307924	ERBB2IP	0.0706731	0.72	10	0.85	5	0.16	7	0.53	10	0.0036	5
2	62054286	FAM161A	0.0707218	0.21	5	0.54	3	0.26	7	0.52	10	0.0122	8
7	102389833	FAM185A	0.0707536	NA	NA	0.29	1	NA	NA	0.0121	2	0.85	1
11	63357583	PLA2G16	0.0707559	0.035	2	NA	NA	NA	NA	0.38	2	NA	NA
7	105103086	PUS7	0.0708773	0.0035	3	0.64	1	0.17	2	0.58	2	0.85	1
1	206239549	C1orf186	0.0709656	0.26	2	0.016	2	NA	NA	0.72	3	NA	NA
2	25194771	DNAJC27	0.0709656	0.018	1	0.32	1	NA	NA	0.52	1	NA	NA
12	111158933	PPP1CC	0.071	0.071	1	NA	NA	NA	NA	NA	NA	NA	NA
17	73987590	TEN1	0.071	NA	NA	0.071	1	NA	NA	NA	NA	NA	NA
19	50455180	SIGLEC11	0.0710449	0.031	2	0.28	4	0.84	2	0.47	3	0.055	2
17	2995463	OR1D2	0.0711846	0.017	3	0.056	1	NA	NA	0.83	4	0.93	2
10	90668488	STAMBPL1	0.0712526	0.71	6	0.19	2	0.013	3	0.27	4	0.4	2
22	27003957	CRYBB1	0.0713295	0.0027	2	NA	NA	0.79	3	0.54	4	0.64	2
6	111306307	RPF2	0.0713702	0.012	3	0.68	1	NA	NA	0.37	3	NA	NA
19	36530421	THAP8	0.0713745	0.14	1	NA	NA	0.73	5	0.38	5	0.019	4
6	106536159	PRDM1	0.071412	0.3	5	0.12	6	0.56	4	0.023	9	0.41	6
20	39974453	LPIN3	0.0715068	0.0027	14	0.45	4	0.88	13	0.18	18	0.99	7
7	23224734	NUPL2	0.0715501	0.35	8	0.081	2	0.75	4	0.69	7	0.013	6
14	24806525	RP11-934B9.3	0.071702	0.44	1	0.169	1	0.13	1	0.9	2	0.022	1
10	44873247	CXCL12	0.0718526	0.43	1	0.12	2	0.022	4	0.18	3	0.94	3
19	11210912	LDLR	0.0718688	0.6	9	0.56	187	0.83	4	0.0013	11	0.53	4
7	142124170	TRBV6-8	0.072	NA	NA	0.072	1	NA	NA	NA	NA	NA	NA
16	4847489	ROGDI	0.0720435	0.28	1	0.027	1	0.11	2	0.4	3	0.58	1
15	22833654	TUBGCP5	0.0721362	0.15	5	0.015	8	0.93	8	0.21	12	0.44	10
17	48460399	LRRC59	0.0722204	0.62	4	NA	NA	NA	NA	0.022	5	NA	NA
22	31924692	SFI1	0.0722695	0.32	17	0.35	9	0.0098	14	0.31	25	0.57	9
2	15744615	DDX1	0.0723921	0.36	4	NA	NA	NA	NA	0.038	3	NA	NA
6	26157073	HIST1H1E	0.0725939	0.00127	3	0.79	3	0.58	3	0.73	5	0.46	2
14	34985658	EAPP	0.0726288	0.52	4	0.82	3	0.84	4	0.039	5	0.014	3
8	133142000	KCNQ3	0.0726944	0.82	3	0.47	5	0.22	3	0.0165	5	0.14	2
19	47223981	STRN4	0.0727413	0.83	3	0.00064	4	0.86	4	0.74	7	0.58	3
22	38308394	MICALL1	0.072771	0.63	5	0.28	2	0.39	3	0.046	9	0.062	5
1	25570058	C1orf63	0.072794	0.0044	3	0.78	4	0.55	4	0.26	6	0.4	3
18	19995731	CTAGE1	0.0728077	0.41	3	0.64	2	0.01	2	NA	NA	0.29	3
3	155560337	SLC33A1	0.0728116	0.36	1	0.37	4	0.76	3	0.002	3	0.97	3
8	39468128	ADAM18	0.0728286	0.0036	5	0.34	5	0.88	12	0.24	25	0.76	9
16	56519604	BBS2	0.0728838	0.071	6	0.48	4	0.49	5	0.62	6	0.019	4
4	68780399	TMPRSS11A	0.0729301	0.047	10	0.29	3	0.43	6	0.12	8	0.28	6
19	15533921	WIZ	0.0729828	0.67	2	0.31	2	NA	NA	0.015	3	NA	NA
19	44669960	ZNF226	0.0729996	0.18	9	0.58	7	0.82	7	0.0096	13	0.24	8
16	22358636	CDR2	0.073	NA	NA	NA	NA	NA	NA	0.073	2	NA	NA
11	66995590	KDM2A	0.073	NA	NA	NA	NA	NA	NA	0.073	3	NA	NA
2	37469792	C2orf56	0.0730577	0.15	3	0.13	1	NA	NA	0.16	6	NA	NA
7	111368454	DOCK4	0.0730718	0.28	11	0.004	7	0.48	11	0.49	18	0.75	6
3	100494075	ABI3BP	0.0730972	0.045	5	0.64	5	0.06	7	0.52	13	0.22	7
22	18640503	USP18	0.0731635	0.77	1	NA	NA	NA	NA	0.018	2	NA	NA
16	67218651	EXOC3L1	0.0732417	0.059	13	0.29	10	0.35	11	0.046	13	0.72	11
1	91403290	ZNF644	0.0732708	0.37	11	0.0097	4	0.2	12	0.79	18	0.35	7
18	61322980	SERPINB3	0.073344	0.014	3	0.16	5	0.86	2	0.86	4	0.12	3
11	67376023	NDUFV1	0.0734277	0.64	2	0.18	4	NA	NA	0.97	3	0.0069	1
3	183853333	EIF2B5	0.0734925	0.037	5	0.39	4	0.36	3	0.32	6	0.12	2
11	2426256	TRPM5	0.0735153	0.18	13	0.25	8	0.84	11	0.16	24	0.033	8
3	43121449	GTDC2	0.0736832	0.95	13	NA	NA	0.2	6	0.12	15	0.034	8
10	104404416	TRIM8	0.0736906	NA	NA	NA	NA	0.99	2	0.0058	3	0.55	3
15	30927362	ARHGAP11B	0.0737618	NA	NA	NA	NA	0.2	1	0.07	1	NA	NA
8	118552171	MED30	0.0739325	0.078	1	NA	NA	NA	NA	0.18	2	NA	NA
2	198436782	RFTN2	0.0739596	0.77	6	0.029	7	0.72	6	0.019	11	0.66	6
19	19040254	HOMER3	0.0739654	0.021	4	0.11	4	0.29	3	0.35	5	0.86	3
19	43376098	PSG1	0.074103	0.44	4	NA	NA	NA	NA	0.032	2	NA	NA
1	6685308	THAP3	0.0741598	NA	NA	0.25	4	0.87	5	0.006	5	0.6	4
12	133351746	GOLGA3	0.0742701	0.022	18	0.87	10	0.52	22	0.051	25	0.4	14
2	218937209	RUFY4	0.0742864	0.093	9	0.2	4	0.12	8	0.35	13	0.26	6
18	55221618	FECH	0.0744325	0.29	4	0.33	5	0.018	4	0.13	7	0.91	5
12	55714483	OR6C1	0.0744549	0.16	2	0.23	1	0.54	2	0.0108	6	0.95	4
15	78757624	IREB2	0.0745238	0.78	6	0.5	7	0.17	3	0.014	7	0.22	4
19	3762750	MRPL54	0.0745386	0.046	1	NA	NA	0.43	1	0.19	1	0.21	1
12	95922691	USP44	0.0746212	0.17	1	0.44	4	0.0072	6	0.95	8	0.4	8
5	43492357	C5orf34	0.0746432	0.24	6	NA	NA	0.0107	4	0.4	7	0.77	5
19	17329186	USE1	0.0746542	0.035	2	0.55	1	0.44	2	0.026	5	0.93	2
11	48510904	OR4A47	0.0746992	0.79	2	0.018	1	NA	NA	NA	NA	NA	NA
20	5155925	CDS2	0.0747658	0.102	2	0.04	1	NA	NA	0.79	1	NA	NA
3	154801978	MME	0.0747875	0.66	6	0.53	3	0.045	4	0.015	7	0.87	4
19	11034582	YIPF2	0.0748053	0.032	2	NA	NA	0.48	2	0.21	4	NA	NA
6	134491422	SGK1	0.0748122	0.78	7	NA	NA	0.2	3	0.96	4	0.0053	2
4	73963889	ANKRD17	0.0748334	0.96	1	0.136	2	0.7	3	0.3	6	0.0075	2
5	147207583	SPINK1	0.0749642	0.75	3	0.56	3	0.24	4	0.62	5	0.0033	2
11	47611672	C1QTNF4	0.075	NA	NA	NA	NA	NA	NA	0.075	2	NA	NA
8	144789624	CCDC166	0.075	0.075	1	NA	NA	NA	NA	NA	NA	NA	NA
17	40734767	FAM134C	0.0751603	0.012	3	NA	NA	0.82	4	0.33	5	NA	NA
6	41652540	TFEB	0.0751735	0.29	1	NA	NA	0.016	3	0.7	4	NA	NA
13	25743748	FAM123A	0.0751735	1	4	0.71	4	0.048	6	0.19	9	0.032	4
12	69140339	SLC35E3	0.0752063	0.25	3	NA	NA	1	3	0.013	5	NA	NA
12	120741669	SIRT4	0.0754076	0.7	5	0.63	4	0.32	4	0.0018	8	0.82	3
1	111663161	DRAM2	0.0754636	NA	NA	0.048	1	NA	NA	0.3	5	NA	NA
5	137451371	NME5	0.0754636	NA	NA	NA	NA	NA	NA	0.024	4	0.6	1
15	25207298	SNURF	0.0754673	NA	NA	NA	NA	0.84	2	0.72	3	0.0054	3
6	7189437	RREB1	0.0755435	0.61	7	0.36	12	0.99	11	0.31	21	0.0031	9
17	1673212	SERPINF1	0.0755569	0.78	5	0.62	3	0.15	6	0.0043	7	0.67	3
12	51347833	HIGD1C	0.0755658	0.0048	2	0.63	1	0.43	2	0.62	1	NA	NA
19	54659584	LENG1	0.0756132	0.36	2	0.25	3	0.93	3	1	7	0.0025	3
10	90429652	LIPF	0.0756248	0.45	3	0.003	2	0.76	1	0.6	3	0.34	1
6	12292615	EDN1	0.075752	0.0032	3	0.52	2	0.53	3	0.28	5	0.85	4
15	45249121	C15orf43	0.076	0.076	3	NA	NA	NA	NA	NA	NA	NA	NA
6	86223524	SNX14	0.0760453	0.103	6	0.49	2	0.26	4	0.035	7	0.46	3
15	65209705	ANKDD1A	0.0761182	0.91	8	0.0053	4	0.65	7	0.25	10	0.27	6
4	69337325	TMPRSS11E	0.0761226	0.29	2	NA	NA	NA	NA	0.76	1	0.015	1
9	35870001	OR13J1	0.07617	NA	NA	0.75	1	0.97	2	0.66	6	0.0017	4
17	56327915	LPO	0.0761728	0.0025	5	0.89	6	0.92	4	0.15	12	0.69	5
10	14563932	FAM107B	0.0761835	0.31	1	0.047	2	NA	NA	NA	NA	NA	NA
13	109365050	MYO16	0.076214	0.11	12	0.14	3	0.51	11	0.036	18	0.75	10
1	50572019	ELAVL4	0.0762204	0.4	1	0.69	1	NA	NA	0.012	2	NA	NA
5	24498542	CDH10	0.0762394	0.036	1	0.025	2	0.66	2	0.47	3	0.76	3
19	45150522	PVR	0.076382	0.58	3	0.61	4	0.47	5	0.16	10	0.008	7
20	25056940	VSX1	0.0764672	0.73	2	0.92	3	0.42	4	0.36	4	0.0021	4
7	148947862	ZNF212	0.0764859	0.003	5	0.18	3	0.59	4	0.93	5	0.72	4
13	46541673	ZC3H13	0.0765092	0.11	3	0.5	8	0.21	10	0.33	20	0.056	10
15	50867290	TRPM7	0.076565	0.15	6	0.27	5	0.041	9	0.13	13	0.99	4
9	75315438	TMC1	0.0765878	0.78	4	0.0008	5	0.89	6	0.7	11	0.55	6
5	176885388	DBN1	0.0766038	0.33	3	0.0104	2	0.94	5	0.17	5	0.39	4
3	141671856	TFDP2	0.0767891	0.51	1	NA	NA	0.023	2	0.87	4	0.081	2
7	156742615	NOM1	0.0768716	0.66	4	0.84	3	0.18	9	0.0028	17	0.77	8
11	5776251	OR52N4	0.0769429	0.14	3	0.64	3	0.026	6	0.25	10	0.37	5
1	28240648	RPA2	0.0771858	NA	NA	0.014	1	0.24	2	0.31	2	0.8	2
10	75574840	CAMK2G	0.0772385	NA	NA	NA	NA	0.78	1	0.019	1	NA	NA
1	110200478	GSTM4	0.0774911	0.16	1	0.093	1	NA	NA	NA	NA	NA	NA
19	4844790	PLIN3	0.0775048	0.76	5	0.69	1	0.16	3	0.005	5	0.52	2
19	3807217	ZFR2	0.077585	0.006	9	0.59	7	0.61	9	0.44	15	0.23	6
11	33308079	HIPK3	0.0776608	1	5	0.3	3	0.0037	8	0.68	14	0.29	8
19	4361703	SH3GL1	0.0778275	0.017	3	NA	NA	NA	NA	0.88	3	NA	NA
12	64668746	C12orf56	0.0778653	0.72	2	0.0145	5	0.36	3	0.13	8	0.45	1
19	50170313	BCL2L12	0.0778809	0.0097	4	0.64	2	NA	NA	0.55	6	NA	NA
7	106685640	PRKAR2B	0.078	NA	NA	0.078	1	NA	NA	NA	NA	NA	NA
17	79993919	DCXR	0.0782505	0.26	2	0.76	1	0.0017	1	0.66	3	1	1
3	49736537	RNF123	0.0783	0.78	7	0.16	5	0.95	9	0.24	17	0.0078	10
10	134006229	DPYSL4	0.0783778	0.53	5	NA	NA	0.63	3	0.0036	4	0.71	5
2	219319666	USP37	0.0783959	0.47	7	0.013	3	0.13	5	0.5	10	0.56	7
3	169539812	LRRIQ4	0.0783982	0.058	1	0.13	3	0.07	2	0.98	4	0.43	1
3	39139776	GORASP1	0.0784417	0.054	6	0.053	4	0.23	9	0.89	8	0.38	6
11	123810502	OR4D5	0.0784923	0.41	4	0.071	2	0.44	3	0.87	8	0.02	4
2	10022893	TAF1B	0.0784928	0.54	7	0.88	2	1	5	0.00067	9	0.7	8
9	21409584	IFNA8	0.0784991	NA	NA	NA	NA	0.84	1	0.018	2	NA	NA
7	97820120	LMTK2	0.0785612	0.83	9	0.07	3	0.49	7	0.14	16	0.056	8
2	42578409	COX7A2L	0.0785698	0.67	2	NA	NA	NA	NA	0.6	4	0.0086	2
2	150061802	LYPD6B	0.0786216	0.93	1	0.0031	1	0.89	1	0.13	2	0.67	2
3	167750504	GOLIM4	0.0786387	0.72	3	0.045	1	0.99	2	0.41	6	0.017	3
13	25264516	ATP12A	0.0786797	0.36	9	0.93	7	0.22	7	0.0098	26	0.31	8
4	87556416	PTPN13	0.0787801	0.23	22	1	17	0.125	23	0.015	36	0.52	21
2	178528641	PDE11A	0.0787864	0.89	11	0.0014	7	0.45	14	1	20	0.4	10
21	33829993	FAM176C	0.0788073	0.31	6	0.2	1	NA	NA	0.056	5	NA	NA
10	124800869	ACADSB	0.0789171	0.85	3	0.14	4	0.27	2	0.02	7	0.35	3
7	128388648	CALU	0.079	0.079	2	NA	NA	NA	NA	NA	NA	NA	NA
1	67220450	TCTEX1D1	0.079	NA	NA	NA	NA	NA	NA	0.079	1	NA	NA
2	103321124	SLC9A2	0.0790472	NA	NA	0.84	3	0.13	4	0.012	4	0.66	3
17	36958971	CWC25	0.0790903	0.16	6	0.82	3	0.66	5	0.79	6	0.0033	3
8	104709424	RIMS2	0.0791412	0.014	4	0.81	6	0.061	9	0.33	14	0.99	10
22	31522450	INPP5J	0.0791575	0.25	3	0.94	2	0.13	4	0.37	8	0.02	4
[truncated: 14,527 more rows]

## Sheet: STable10
Supplementary Table 10: All multiethnic meta-analysis p-values for EMMAX-CMC
Chr	Pos	Gene	Meta-pvalue	EACC pval	EACC Variant Number	EPICNorfolk pval	EPICNorfolk Variant Number	BDES pval	BDES Variant Number	IECC pval	IECC Variant Number	REHS pval	REHS Variant Number
1	77528749	ST6GALNAC5	4.23016e-10	0.3076	1	NA	NA	NA	NA	5.323e-11	1	NA	NA
19	18497141	GDF15	1.12313e-09	0.1558	2	0.9879	2	NA	NA	8.498e-08	2	1.897e-05	2
3	33877626	PDCD6IP	1.44752e-07	0.002177	3	NA	NA	NA	NA	3.37e-06	5	NA	NA
2	10262920	RRM2	8.7187e-07	NA	NA	NA	NA	0.2754	1	0.00952	1	1.613e-06	1
19	47197177	PRKD2	1.02764e-06	0.06254	3	0.9862	4	0.5503	3	0.8019	3	2.53e-09	3
12	2967949	FOXM1	1.09141e-06	0.2489	13	0.9551	4	0.5178	9	0.4109	13	1.463e-09	6
19	12637322	ZNF564	1.18969e-06	6.462e-06	2	NA	NA	0.03817	2	0.02421	2	NA	NA
19	12995797	KLF1	1.287e-06	NA	NA	1.287e-06	3	NA	NA	NA	NA	NA	NA
1	175130119	KIAA0040	2.88605e-06	0.8859	1	0.9802	1	NA	NA	0.3403	2	6.176e-09	2
1	153580072	S100A16	3.22903e-06	0.1964	2	0.7055	1	0.2927	2	5.129e-08	1	NA	NA
17	46847364	TTLL6	4.96601e-06	5.693e-08	6	0.1996	4	0.2663	8	0.2225	13	0.6819	6
12	86198935	RASSF9	1.51614e-05	0.1959	2	0.3958	2	0.8716	5	0.1085	9	2.451e-07	3
16	77822740	VAT1L	1.88936e-05	0.2634	6	0.6025	1	0.5276	2	1.984e-07	5	NA	NA
2	175962173	ATF2	2.51086e-05	NA	NA	0.2141	1	0.2558	3	0.09752	4	4.362e-06	2
3	196098796	UBXN7	2.60782e-05	NA	NA	0.1903	1	0.05799	1	3.438e-06	1	0.6424	1
2	48807796	STON1	2.66436e-05	0.634	4	0.05277	5	0.001386	9	0.003168	15	0.02456	5
7	127343354	SND1	2.97184e-05	0.9113	3	0.03078	3	0.02204	3	0.09451	9	7.072e-05	4
3	178927410	PIK3CA	3.81268e-05	0.3867	1	NA	NA	NA	NA	7.145e-06	1	NA	NA
1	154309887	ATP8B2	4.97812e-05	0.8272	7	0.02069	4	0.9507	7	0.05833	11	8.287e-06	5
1	27267996	NUDC	6.31961e-05	0.003031	5	NA	NA	0.1017	3	0.1315	6	0.001737	2
2	48807796	STON1-GTF2A1L	7.87081e-05	0.7512	10	0.04327	7	0.0009739	11	0.007664	18	0.05767	6
5	157098756	C5orf52	9.08655e-05	NA	NA	0.001099	1	0.00751	3	0.09693	3	NA	NA
1	2441358	PANK4	9.6647e-05	0.3919	1	NA	NA	NA	NA	0.01578	5	0.0001389	2
12	47471555	AMIGO2	0.000115932	0.000539	2	0.189	1	0.0553	3	0.02433	5	0.1667	4
1	248844695	OR14I1	0.000120639	0.06523	4	0.02581	3	0.1928	4	0.01416	7	0.005229	2
21	34640780	IL10RB	0.000123112	0.06604	3	NA	NA	0.5078	2	0.7138	5	6.598e-06	3
16	54318165	IRX3	0.0001295	0.0001295	2	NA	NA	NA	NA	NA	NA	NA	NA
3	52570892	C3orf78	0.000130804	NA	NA	0.8262	1	NA	NA	2.648e-06	1	0.557	1
8	101717149	PABPC1	0.00015906	NA	NA	0.1334	2	NA	NA	9.732e-05	3	NA	NA
17	76115463	TMC6	0.000165997	0.7304	4	0.02138	4	0.7301	8	0.469	13	6.753e-06	10
18	61377548	SERPINB11	0.000173396	0.2372	4	0.3575	2	0.001792	6	0.2206	10	0.001139	4
7	92161827	RBM48	0.000182656	0.002028	1	0.5994	1	0.9193	4	0.2744	6	0.0001331	2
18	11851686	CHMP1B	0.0001954	NA	NA	NA	NA	NA	NA	0.0001954	2	NA	NA
3	128780823	GP9	0.0001958	NA	NA	NA	NA	NA	NA	0.0001958	2	NA	NA
16	5097882	C16orf89	0.000214604	0.0124	3	0.05543	2	0.007652	5	0.01045	8	0.9133	3
7	24738788	DFNA5	0.000240822	0.05373	6	0.6613	2	0.3004	1	0.8847	8	6.166e-06	3
9	21141089	IFNW1	0.000254473	0.5237	1	0.6873	1	0.1657	2	0.7219	2	1.452e-06	2
12	71523134	TSPAN8	0.000256693	0.2573	2	0.8142	1	0.4893	2	0.7465	6	8.262e-07	3
14	93652681	RP11-371E8.4	0.000262045	0.1776	3	0.006623	2	0.7843	2	0.009296	2	0.007571	2
12	13240162	GSG1	0.000262933	0.06638	2	0.006973	2	0.3094	4	0.002053	9	0.2218	6
9	132501906	PTGES	0.000274	NA	NA	NA	NA	NA	NA	0.000274	1	NA	NA
8	145223221	HEATR7A	0.000288283	0.5155	3	0.4801	3	0.5285	5	0.8419	8	6.67e-07	2
1	110257814	GSTM5	0.000304441	9.41e-06	2	0.2007	1	0.4611	2	0.5507	4	NA	NA
11	9606879	WEE1	0.000313773	5.797e-06	1	0.8572	1	NA	NA	0.6792	1	NA	NA
21	43733628	TFF3	0.00031535	0.003762	3	0.3344	1	0.9459	1	0.3275	2	0.0002117	1
4	48896023	OCIAD2	0.000324411	0.2847	2	NA	NA	0.2615	1	4.714e-05	4	NA	NA
19	51503285	KLK8	0.000330308	0.4911	2	0.1547	1	4.718e-05	3	NA	NA	NA	NA
12	53491511	IGFBP6	0.0003567	NA	NA	NA	NA	NA	NA	0.0003567	2	NA	NA
1	155896514	KIAA0907	0.0003643	0.0003643	2	NA	NA	NA	NA	NA	NA	NA	NA
3	137742541	CLDN18	0.000365574	7.991e-06	2	0.519	3	0.5519	2	0.09088	3	0.4805	3
16	3273905	ZNF200	0.000375742	0.6984	11	0.1602	2	0.1183	5	1.219e-05	9	0.642	4
17	4835895	GP1BA	0.00039617	0.000469	3	0.7109	4	0.03617	5	0.01318	6	0.6982	4
21	45649954	ICOSLG	0.000397457	0.01202	4	NA	NA	NA	NA	0.002939	7	NA	NA
19	863220	CFD	0.000426131	NA	NA	NA	NA	0.3861	1	0.4504	2	2.78e-05	2
15	100269378	LYSMD4	0.000450912	0.02371	5	0.01186	4	0.08458	6	0.3427	12	0.01612	6
7	123296159	LMOD2	0.000483302	0.0001374	3	0.3676	2	0.02887	4	0.1741	6	0.5667	4
16	85834818	COX4I1	0.00048628	NA	NA	NA	NA	NA	NA	8.322e-05	1	0.5298	1
10	43650944	CSGALNACT2	0.000525005	0.1535	1	NA	NA	7.442e-05	1	0.5412	5	NA	NA
11	5878358	OR52E8	0.000537718	0.01556	7	0.003288	2	0.08438	3	0.1633	4	0.2347	2
19	16764936	C19orf42	0.000547557	NA	NA	0.7358	1	0.6488	2	1.361e-05	2	NA	NA
11	73141742	FAM168A	0.0005594	NA	NA	NA	NA	NA	NA	0.0005594	1	NA	NA
2	113410374	SLC20A1	0.000615601	0.1452	1	0.1047	1	0.5141	3	0.1478	3	0.0001711	2
11	62763248	SLC22A8	0.000646527	NA	NA	0.8705	3	0.4956	3	0.2509	6	1.132e-05	3
3	46414470	CCR5	0.000657419	0.1961	11	0.1546	6	0.7551	4	0.3322	6	2.834e-05	6
1	204507383	MDM4	0.000670178	NA	NA	0.4156	3	0.697	4	0.5169	5	8.561e-06	4
5	140011867	CD14	0.000687405	NA	NA	NA	NA	0.7561	3	0.194	3	5.798e-05	2
17	48940422	TOB1	0.000696789	NA	NA	0.6514	1	NA	NA	0.0001006	2	NA	NA
2	113479614	NT5DC4	0.0007081	NA	NA	0.0007081	3	NA	NA	NA	NA	NA	NA
1	11073982	TARDBP	0.000710239	NA	NA	0.1634	7	NA	NA	0.0004096	1	NA	NA
16	511421	RAB11FIP3	0.000729593	0.005017	2	NA	NA	0.1064	2	0.003774	5	0.708	5
3	182681777	DCUN1D1	0.0007387	0.0007387	1	NA	NA	NA	NA	NA	NA	NA	NA
6	105726036	PREP	0.000797112	8.323e-05	2	0.2347	2	0.5554	4	0.03239	6	0.7912	4
7	56007584	ZNF713	0.000852583	0.0001655	1	0.2208	1	NA	NA	0.3006	4	NA	NA
9	107331464	OR13C8	0.000881729	NA	NA	0.08796	2	0.9026	3	0.03432	9	0.0006647	2
3	49004687	ARIH2	0.0008895	NA	NA	NA	NA	NA	NA	0.0008895	1	NA	NA
17	16347325	FAM211A	0.000897974	0.0785	2	0.8458	4	NA	NA	0.6852	3	4.074e-05	2
5	167993100	PANK3	0.000922822	NA	NA	NA	NA	0.02107	1	0.004243	1	NA	NA
5	1318491	CLPTM1L	0.00099202	0.987	6	0.0001075	4	0.2971	5	0.0237	9	0.4977	5
14	30046511	PRKD1	0.000992666	0.807	6	NA	NA	0.5569	5	0.02919	5	0.0001604	1
9	116854689	KIF12	0.00100828	0.4624	2	0.4635	1	0.05333	3	0.361	4	9.209e-05	3
1	152006266	S100A11	0.00104295	NA	NA	0.04284	1	0.07865	1	0.004146	2	NA	NA
10	125769691	CHST15	0.00105566	0.1807	9	0.6459	1	0.008089	2	0.8524	9	0.000502	2
13	31712572	HSPH1	0.00114956	0.237	2	0.5035	3	0.5503	3	0.271	6	2.544e-05	2
4	174219273	GALNT7	0.0011671	0.0009537	3	0.01197	4	0.7934	5	0.2145	4	0.2378	4
10	83635785	NRG3	0.00121106	0.4463	3	0.6986	4	0.2835	5	0.1091	7	5.034e-05	3
12	7894056	CLEC4C	0.00122078	NA	NA	0.004222	2	NA	NA	0.02888	2	NA	NA
11	59860922	MS4A2	0.00126833	0.1119	3	0.1883	2	0.5048	5	0.9136	7	5.315e-05	3
10	118424362	C10orf82	0.00127007	0.08484	4	0.2271	1	NA	NA	0.0009179	4	NA	NA
4	1719294	TMEM129	0.00140719	0.0002023	2	NA	NA	NA	NA	0.7059	4	NA	NA
10	38241067	ZNF25	0.001412	0.001412	5	NA	NA	NA	NA	NA	NA	NA	NA
18	25532304	CDH2	0.00145962	0.3828	4	0.6471	4	8.135e-06	3	0.7775	7	0.3982	4
1	27432204	SLC9A1	0.00147659	NA	NA	0.746	2	0.9611	2	0.06584	3	7.391e-05	2
5	140864784	PCDHGC4	0.00149561	0.06384	8	0.004356	4	0.9629	9	0.01639	10	0.1469	7
18	74082536	ZNF516	0.00151548	0.001332	9	0.5986	6	0.01441	7	0.2176	12	0.2625	7
17	38926124	KRT26	0.00153079	0.6005	4	0.003479	4	0.04033	9	0.5434	8	0.01453	6
1	57395130	C8B	0.00154723	0.02931	15	0.05941	3	0.07112	8	0.01069	12	0.5098	9
5	114961392	TMED7	0.001595	0.001595	2	NA	NA	NA	NA	NA	NA	NA	NA
4	84015850	PLAC8	0.001606	NA	NA	NA	NA	NA	NA	0.001606	2	NA	NA
14	73961982	HEATR4	0.00166031	0.1467	15	0.9904	4	0.6958	7	0.4128	16	1.779e-05	10
10	124672351	FAM24A	0.001688	NA	NA	NA	NA	NA	NA	0.001688	1	NA	NA
19	58517342	CTD-2368P22.1	0.001705	NA	NA	0.001705	1	NA	NA	NA	NA	NA	NA
6	131179302	EPB41L2	0.00171275	0.05509	12	0.3221	4	0.1907	10	0.7403	14	0.0003091	8
12	108145285	PRDM4	0.00176772	0.1396	1	0.0006088	1	0.5853	5	0.05055	9	0.3214	4
19	8577545	ZNF414	0.00178343	0.4661	1	0.003575	1	NA	NA	0.01597	2	NA	NA
6	151869451	CCDC170	0.0017974	0.01159	11	0.2331	6	0.3393	11	0.03252	22	0.02773	8
4	165961438	TRIM60	0.0018267	0.4443	4	0.09922	5	0.1685	6	0.002361	10	0.04818	5
8	32453358	NRG1	0.00183889	0.8306	12	0.6179	3	0.3564	9	0.4952	17	9.413e-06	9
20	43353380	WISP2	0.00184429	NA	NA	0.07106	1	NA	NA	0.002717	2	NA	NA
12	49164731	ADCY6	0.00190292	0.0473	6	0.00262	5	0.1131	7	0.07083	13	0.8997	6
10	72192816	NODAL	0.00193203	0.3501	5	0.845	1	NA	NA	9.909e-05	2	NA	NA
12	123214166	HCAR1	0.00194483	0.009402	2	0.2884	2	0.1908	4	0.7642	7	0.002327	3
17	68128241	KCNJ16	0.00196924	0.4814	9	0.564	4	0.1478	6	0.5993	8	3.891e-05	2
12	109510147	USP30	0.00200538	6.454e-05	1	0.247	4	0.1003	4	0.6642	5	0.9032	2
19	47767890	CCDC9	0.00206517	0.0348	5	0.6706	3	0.01701	4	0.02333	5	0.1078	5
1	150482145	ECM1	0.00214393	0.5653	4	0.3433	2	0.02765	1	0.0005578	8	0.351	3
3	149243847	WWTR1	0.00214406	0.1364	5	0.2879	1	0.2835	4	0.979	4	9.64e-05	3
14	66082793	FUT8	0.00215035	0.0004011	2	NA	NA	NA	NA	NA	NA	0.5715	1
1	109704618	KIAA1324	0.00216354	0.8857	9	0.4042	10	0.1369	6	0.09685	11	0.0002241	5
3	52455721	PHF7	0.00217124	0.1871	2	0.0001669	1	0.4451	4	0.4122	2	NA	NA
15	75932172	IMP3	0.00219428	0.3571	2	0.22	1	0.0009623	2	0.09791	2	0.1465	1
12	69651628	CPSF6	0.002214	0.002214	1	NA	NA	NA	NA	NA	NA	NA	NA
3	10074592	FANCD2	0.00223206	0.3994	9	0.1589	5	0.08178	9	0.005075	14	0.04214	7
11	63713377	NAA40	0.00223712	0.139	1	0.3799	2	0.4131	2	0.5699	2	8.956e-05	2
13	50080847	PHF11	0.0022594	0.006036	3	NA	NA	NA	NA	0.04014	3	NA	NA
4	57164405	KIAA1211	0.00226415	0.02918	6	0.9506	5	0.9318	8	0.0001521	14	0.2879	12
8	144808923	FAM83H	0.00226952	0.6397	6	0.003834	4	0.04776	5	0.01069	9	0.9068	3
1	246890251	SCCPDH	0.00229777	0.01018	5	0.3392	2	0.3532	5	0.405	9	0.002338	2
20	44166646	WFDC6	0.002307	NA	NA	NA	NA	NA	NA	0.002307	2	NA	NA
4	114376933	CAMK2D	0.00235578	3.041e-05	1	0.3338	1	0.8487	3	0.5604	2	0.2475	2
17	7462960	TNFSF12-TNFSF13	0.00238488	0.003616	2	0.01852	1	NA	NA	0.5651	1	NA	NA
13	50594532	KCNRG	0.00242173	0.006757	1	0.08363	1	NA	NA	0.06823	3	NA	NA
7	142417019	U66061.31	0.002448	NA	NA	0.002448	1	NA	NA	NA	NA	NA	NA
11	67401660	TBX10	0.00245162	0.1146	2	0.006739	2	0.2431	3	0.1688	3	0.03982	3
6	39824130	DAAM2	0.00251897	0.001547	5	0.7442	9	0.431	21	0.1063	20	0.02483	14
17	4675378	TM4SF5	0.00263839	0.6129	2	0.9428	2	NA	NA	7.406e-05	4	NA	NA
3	119248689	CD80	0.00268026	0.0008513	3	NA	NA	NA	NA	0.3447	4	NA	NA
8	107773278	ABRA	0.00268263	0.718	7	NA	NA	0.0001236	3	0.4921	3	NA	NA
11	57367467	SERPING1	0.00269958	0.003176	1	0.07485	2	0.04961	2	0.6444	4	NA	NA
7	87563794	ADAM22	0.00272985	0.001104	2	0.01227	1	0.6208	4	0.3687	9	0.4717	4
7	940181	ADAP1	0.00275142	NA	NA	0.0003036	1	NA	NA	0.4823	3	0.3076	2
5	61747557	IPO11	0.00275221	NA	NA	0.1692	2	0.000396	2	0.4262	3	0.2729	5
14	69341650	ACTN1	0.00296048	NA	NA	NA	NA	0.0004508	3	0.7279	2	NA	NA
3	15719049	ANKRD28	0.00296063	0.07814	5	0.2569	4	0.1144	3	0.01068	10	0.06668	5
6	27860534	HIST1H3J	0.003012	NA	NA	0.003012	1	NA	NA	NA	NA	NA	NA
16	86544651	FOXF1	0.00302834	0.5476	1	NA	NA	NA	NA	0.0006147	1	NA	NA
7	72717986	NSUN5	0.00303968	NA	NA	0.6622	3	0.515	3	0.01924	2	0.001352	2
1	156437916	MEF2D	0.00308415	0.03501	2	0.0003519	2	0.7514	3	0.367	3	0.5093	2
5	176759170	LMAN2	0.00312765	NA	NA	0.01871	1	0.2747	1	0.5499	6	0.003258	2
17	1370828	MYO1C	0.00317016	0.03918	8	0.9525	10	0.7944	11	0.008142	18	0.007446	9
3	183774022	HTR3C	0.00317356	0.06601	5	0.4005	2	0.02024	4	0.4645	3	0.007242	2
17	27910045	GIT1	0.00320464	0.0004953	3	NA	NA	NA	NA	0.7243	2	NA	NA
15	40462771	BUB1B	0.00320733	0.00032	4	0.1368	8	0.6698	10	0.2062	12	0.3021	7
12	96266039	CCDC38	0.00329872	0.2332	6	NA	NA	NA	NA	0.8331	10	0.0002894	2
1	183184650	LAMC2	0.00333191	0.000407	18	0.9462	13	0.05147	14	0.1408	18	0.6899	16
16	66918288	PDP2	0.00334858	0.289	5	0.9718	1	0.1655	3	0.0001102	5	0.3785	6
17	39880966	HAP1	0.0033556	0.5289	5	0.4831	4	0.7965	3	0.0001113	7	0.08584	5
1	12907457	HNRNPCL1	0.003406	NA	NA	0.003406	3	NA	NA	NA	NA	NA	NA
7	84628989	SEMA3D	0.00342421	0.3854	5	0.4695	2	0.7127	6	0.06846	6	0.0002265	4
2	102472459	MAP4K4	0.00346465	NA	NA	0.3132	4	0.09732	4	0.0004111	10	0.8402	6
17	7462960	TNFSF12	0.0035243	0.003616	2	0.02984	2	NA	NA	0.5651	1	NA	NA
2	186627943	FSIP2	0.00353903	0.01901	17	0.07384	28	0.01641	26	0.1534	31	0.5924	26
20	62705874	RGS19	0.00358552	NA	NA	0.002984	2	NA	NA	0.1722	1	0.1212	1
6	132636774	MOXD1	0.00359776	NA	NA	0.7558	5	0.08301	4	0.007826	8	0.02253	2
15	78917573	CHRNB4	0.003708	0.1407	6	0.2733	9	0.007336	5	0.455	10	0.0174	6
11	25004730	LUZP2	0.00377821	0.2205	4	NA	NA	NA	NA	0.2626	3	0.001147	1
1	31769528	SNRNP40	0.00377958	NA	NA	0.2214	1	0.001347	1	0.2228	2	NA	NA
17	9862550	GAS7	0.00380277	0.1154	1	NA	NA	0.08948	2	0.0157	4	0.07339	2
5	37293008	NUP155	0.00380984	0.994	6	NA	NA	0.0957	5	0.0002251	9	0.557	3
16	88643704	ZC3H18	0.00383123	0.2123	11	0.1744	7	0.7568	9	0.7349	11	0.0001135	7
11	73687973	UCP2	0.00385182	0.1477	1	0.002918	4	NA	NA	0.1578	5	NA	NA
9	117400861	C9orf91	0.00388391	0.0003946	1	0.5798	2	0.2341	1	NA	NA	0.2284	1
5	71516912	MRPS27	0.00392024	0.318	7	0.01801	4	0.4646	5	0.3354	7	0.002704	3
9	117791664	TNC	0.00393502	0.01859	22	0.09285	11	0.2212	24	0.00759	38	0.8371	22
19	21990464	ZNF43	0.003963	NA	NA	NA	NA	NA	NA	0.003963	4	NA	NA
1	209961910	IRF6	0.00403705	0.2251	1	NA	NA	NA	NA	0.002068	2	NA	NA
2	210517947	MAP2	0.0040891	0.1005	12	0.427	5	0.202	9	0.2684	19	0.0011	11
11	60694781	TMEM132A	0.00409586	0.0003655	11	0.2967	3	0.9455	6	0.1356	10	0.1845	5
5	79024779	CMYA5	0.00412337	0.3326	38	0.4984	25	0.258	40	0.02781	64	0.002177	39
1	44877962	RNF220	0.00414339	NA	NA	NA	NA	NA	NA	0.5628	6	0.0008518	2
11	56344260	OR5M10	0.004222	NA	NA	NA	NA	NA	NA	0.004222	3	NA	NA
12	52680049	KRT81	0.00430811	0.9858	4	0.1529	4	0.8329	2	0.02055	6	0.001067	3
5	14602358	FAM105A	0.00430881	0.5035	4	0.001467	3	0.3724	4	0.01696	4	0.5902	5
14	105957446	C14orf80	0.00447404	0.258	9	0.155	4	0.04851	5	0.2567	13	0.005828	7
16	89167717	ACSF3	0.00451341	0.06266	14	0.003959	3	0.5816	5	0.3744	11	0.05439	5
7	99217536	ZNF498	0.00451361	0.1933	4	0.9617	1	0.5472	2	0.03391	3	0.0008518	2
14	20710981	OR11H4	0.0045907	0.6973	2	0.2894	5	0.1095	5	0.007077	10	0.01924	8
10	88911841	FAM35A	0.00464	0.00464	2	NA	NA	NA	NA	NA	NA	NA	NA
17	41367905	TMEM106A	0.00465064	0.7522	2	4.91e-05	2	NA	NA	0.4476	4	0.9387	2
20	62500730	TPD52L2	0.00467964	0.8723	2	0.007522	2	0.01499	2	0.06219	1	0.5053	1
19	856015	ELANE	0.00468497	0.5115	2	0.4533	2	0.0002185	1	NA	NA	0.3093	1
13	106119492	DAOA	0.004776	NA	NA	NA	NA	NA	NA	0.004776	2	NA	NA
22	30886156	SEC14L4	0.00477664	0.5875	6	0.3874	4	0.2338	4	0.4722	8	0.0001266	2
5	141021093	FCHSD1	0.00491212	0.09789	8	0.3622	5	0.4225	7	0.6135	10	0.00036	5
10	67680276	CTNNA3	0.00498227	0.2458	13	0.4447	5	0.2679	9	0.8506	13	0.0001355	9
5	40841609	CARD6	0.00505618	0.454	10	0.0007053	6	0.1414	12	0.4061	22	0.1874	10
18	55143924	ONECUT2	0.00506768	0.0004008	1	0.2946	2	NA	NA	0.8082	1	NA	NA
6	46623690	SLC25A27	0.00510343	0.4966	3	0.1882	1	NA	NA	0.00103	3	NA	NA
10	114925369	TCF7L2	0.00521258	0.5156	2	NA	NA	NA	NA	0.001206	5	NA	NA
9	37495255	POLR1E	0.00530542	0.9695	5	0.0009549	2	0.00659	1	0.634	6	0.9533	3
19	36940622	ZNF566	0.00533352	NA	NA	NA	NA	0.00302	2	0.5287	2	0.06368	2
14	25043671	CTSG	0.0053456	NA	NA	NA	NA	0.0463	1	0.01382	3	NA	NA
9	116151901	ALAD	0.00543974	0.965	2	0.7102	2	NA	NA	0.2276	2	0.0001225	2
5	77298814	AP3B1	0.00548125	0.5952	5	0.6464	4	0.08407	9	0.1581	13	0.000755	6
6	33254665	WDR46	0.00549452	0.8782	3	NA	NA	0.7939	3	0.002187	3	0.0127	2
7	142919424	TAS2R40	0.00550335	0.06861	2	0.7727	1	NA	NA	0.001994	3	NA	NA
2	230902140	SLC16A14	0.00552936	0.001244	3	NA	NA	NA	NA	0.5345	3	NA	NA
3	11643410	VGLL4	0.00553147	0.6017	2	0.02786	3	0.00295	3	0.3951	2	NA	NA
15	41245731	CHAC1	0.00554573	0.002813	5	0.3692	3	0.4973	6	0.008836	6	0.8601	3
7	151791576	GALNT11	0.00558956	0.2885	6	0.02774	4	0.2404	8	0.007859	14	0.2625	9
16	28603710	SULT1A2	0.005613	0.005613	2	NA	NA	NA	NA	NA	NA	NA	NA
9	103064523	TEX10	0.00567183	0.01439	5	0.02859	4	0.1046	3	0.3149	6	0.299	4
10	75406617	SYNPO2L	0.00572288	7.888e-05	3	0.7594	3	0.648	4	0.1933	7	0.5469	3
4	667134	ATP5I	0.00578093	0.4523	2	0.002074	1	NA	NA	0.1198	3	NA	NA
18	44266176	ST8SIA5	0.00581856	0.8028	4	0.01312	3	0.6252	5	0.4325	7	0.001475	3
16	56485625	OGFOD1	0.00587401	0.4401	5	0.469	1	0.5695	4	0.7465	10	4.852e-05	4
12	104174131	NT5DC3	0.00589608	0.9292	3	0.3397	1	0.8653	1	0.6568	1	2.386e-05	1
15	90798991	TTLL13	0.00596179	0.3651	2	0.4137	3	0.003354	5	0.0302	10	0.2842	3
9	95993170	WNK2	0.00599297	0.5539	12	0.5305	3	0.4157	6	0.0001729	9	0.2074	4
9	132591509	C9orf78	0.00606802	0.09083	1	0.1905	3	0.5196	1	0.002459	1	NA	NA
1	186313108	TPR	0.0061751	0.6447	8	0.8912	9	0.09697	12	0.3344	18	0.0002453	12
7	156437221	RNF32	0.00619473	0.6091	5	NA	NA	0.0001467	2	0.3978	10	0.6394	4
5	66478729	CD180	0.00623245	0.8561	7	NA	NA	0.1017	4	0.8004	8	0.0003288	2
11	55999664	OR5T2	0.00631764	0.3554	5	0.1194	1	0.009664	1	0.0942	2	0.1222	1
12	122657198	IL31	0.00651037	NA	NA	0.003009	1	0.5808	2	0.07457	1	NA	NA
22	20800848	KLHL22	0.0065834	NA	NA	0.1572	1	0.592	1	0.00142	2	NA	NA
1	22141206	LDLRAD2	0.00658809	0.006914	1	NA	NA	NA	NA	0.1174	3	NA	NA
12	7280874	RBP5	0.00667197	0.1981	2	NA	NA	0.004157	1	NA	NA	NA	NA
20	54823993	MC3R	0.00669453	0.8337	1	0.165	4	NA	NA	0.003836	4	0.04779	3
15	76452476	C15orf27	0.00677081	0.01262	5	0.04173	1	0.08183	3	0.7269	10	0.1663	4
11	17323361	NUCB2	0.006786	NA	NA	NA	NA	NA	NA	0.006786	2	NA	NA
11	74700170	NEU3	0.00679967	0.03552	6	0.009617	2	0.1328	1	0.299	2	0.3864	3
7	75864433	SRRM3	0.00680898	0.01453	2	0.3457	2	0.2746	2	0.1493	2	0.0255	2
22	20043485	C22orf25	0.00699208	0.2857	3	NA	NA	0.02301	1	0.03769	5	0.1079	1
20	60714788	PSMA7	0.007007	0.007007	1	NA	NA	NA	NA	NA	NA	NA	NA
17	55027115	COIL	0.00703484	0.06219	3	0.009502	3	0.1047	3	0.1236	6	0.7194	2
6	108029156	SCML4	0.00704573	0.3025	3	0.001661	3	NA	NA	0.2863	4	NA	NA
9	5549568	PDCD1LG2	0.00705329	0.9275	1	0.0118	1	0.08246	1	0.2045	4	0.02992	1
11	65307852	LTBP3	0.00708893	0.2632	3	0.6957	4	0.5877	1	0.1111	7	0.0004652	4
6	42559926	UBR2	0.00710994	0.05224	7	NA	NA	0.2044	3	0.00391	7	0.6549	4
6	170140288	TCTE3	0.0071157	0.005168	3	0.1715	1	NA	NA	NA	NA	NA	NA
5	40931237	C7	0.00712179	0.8698	6	0.2316	6	0.2872	9	0.0006927	16	0.1397	10
2	29354153	CLIP4	0.00714669	0.1549	8	0.003378	5	0.08108	5	0.3531	8	0.3756	5
16	81397495	GAN	0.00717182	0.004166	1	0.3182	4	0.2535	2	0.02658	4	0.6331	2
4	78815326	MRPL1	0.00719043	0.008053	3	NA	NA	0.02394	3	0.7654	3	NA	NA
14	23342582	LRP10	0.007199	0.004475	5	0.1952	2	0.1996	7	0.5351	10	0.06094	7
17	79632308	OXLD1	0.007227	NA	NA	NA	NA	NA	NA	0.007227	2	NA	NA
12	122091018	MORN3	0.0072783	0.019	4	0.419	1	0.4782	3	0.03866	6	0.03924	3
11	35454214	PAMR1	0.00729516	0.4383	10	0.002097	5	0.144	11	0.3431	11	0.1276	8
16	57147265	CPNE2	0.00731674	NA	NA	NA	NA	NA	NA	0.0009537	4	0.9594	2
17	706933	NXN	0.00734704	NA	NA	0.000655	3	0.3585	3	0.6456	3	NA	NA
9	20363496	MLLT3	0.00739543	0.05208	2	0.2494	2	NA	NA	0.04069	3	0.05455	3
5	71739798	ZNF366	0.00743857	0.6168	7	0.6043	5	0.2513	3	8.931e-05	7	0.7122	3
22	32802742	C22orf28	0.00749915	0.004991	1	0.1332	2	NA	NA	0.05452	5	0.8105	2
6	153323570	MTRF1L	0.007618	NA	NA	NA	NA	0.007618	1	NA	NA	NA	NA
2	119603999	EN1	0.007658	0.007658	1	NA	NA	NA	NA	NA	NA	NA	NA
21	43766655	TFF2	0.00775051	0.1366	6	NA	NA	NA	NA	0.3043	3	0.0039	3
12	101336201	ANO4	0.00788457	0.4092	4	0.0003154	1	0.1325	1	0.5151	5	0.7352	2
19	45810035	CKM	0.00799081	0.6367	3	0.8224	2	0.6011	5	0.2741	5	7.652e-05	2
20	30053322	DEFB124	0.0080317	NA	NA	0.01387	1	0.1055	1	0.09702	4	0.227	2
14	24658776	RP11-468E2.2	0.00818525	NA	NA	0.002374	2	NA	NA	0.4382	2	NA	NA
3	49215451	RP11-694I15.6	0.00821432	0.9925	2	NA	NA	0.008234	1	0.02134	1	NA	NA
11	68673601	IGHMBP2	0.00821635	0.08807	6	0.4694	6	0.001967	12	0.3225	16	0.262	15
20	44515322	SPATA25	0.00822032	0.0002308	1	0.2073	3	0.7091	2	0.3325	4	0.6095	3
16	8953028	CARHSP1	0.00823412	NA	NA	0.1401	1	0.9748	4	0.4418	5	0.0005524	2
1	214492286	SMYD2	0.00829395	0.5395	2	0.0005534	3	0.1225	2	0.279	5	0.6825	2
5	140762554	PCDHGA7	0.00837733	0.585	5	0.09961	5	0.8689	9	0.2382	15	0.0005858	10
16	57596332	GPR114	0.00845981	0.409	4	0.1837	4	0.000879	3	0.2244	6	0.4835	4
9	33750845	PRSS3	0.00848025	NA	NA	0.217	4	0.5127	3	0.6819	4	0.0004572	1
7	76019476	SRCRB4D	0.00864387	0.6952	3	0.06048	4	0.3931	5	0.06763	4	0.006612	4
20	25056940	VSX1	0.00873633	0.914	2	0.6238	3	0.1539	4	0.08616	4	0.0009927	4
3	133921601	RYK	0.00881538	0.0598	1	NA	NA	NA	NA	0.01894	2	NA	NA
15	65209705	ANKDD1A	0.00886431	0.4083	8	0.001823	4	0.9039	7	0.06332	10	0.1799	6
6	116599896	TSPYL1	0.00892406	0.8944	5	0.7315	1	0.004664	2	0.01253	2	0.2024	2
11	89947246	CHORDC1	0.008973	NA	NA	NA	NA	NA	NA	0.008973	1	NA	NA
13	43148653	TNFSF11	0.00897788	NA	NA	0.03734	3	0.04178	1	0.03958	2	0.6069	3
15	52065939	TMOD2	0.00905075	0.001662	2	NA	NA	NA	NA	0.7024	3	NA	NA
3	44926861	TGM4	0.00909114	0.1884	14	0.007782	5	0.6794	9	0.008639	14	0.9237	9
12	105418221	ALDH1L2	0.00918351	0.1617	4	0.1022	8	0.02652	9	0.04027	16	0.457	8
1	8073700	ERRFI1	0.0092013	0.2021	3	0.005376	1	0.8216	3	0.1377	7	0.0658	4
11	68529121	CPT1A	0.00920426	0.9907	5	0.1869	7	0.01323	4	0.008138	9	0.4059	4
2	135095857	MGAT5	0.00921963	0.0009045	3	0.3474	1	0.6601	3	0.06992	5	0.5593	4
10	123842523	TACC2	0.00924502	0.04501	26	0.08148	21	0.4497	25	0.01889	50	0.2614	30
11	18158753	MRGPRX3	0.00927139	0.1004	4	0.1681	1	0.006503	1	0.3567	1	NA	NA
6	116265504	FRK	0.00937268	0.004715	3	0.1407	1	0.04202	3	0.4347	8	0.6855	3
20	42885925	GDAP1L1	0.00948858	0.2225	3	NA	NA	0.08035	2	0.0117	1	NA	NA
6	31627273	C6orf47	0.00962834	0.1646	1	0.1321	5	0.00282	4	0.3752	5	0.3754	5
6	53140991	ELOVL5	0.00966433	0.6158	1	0.7617	1	0.008525	2	0.02039	4	0.1065	2
19	2290767	LINGO3	0.00967209	NA	NA	0.267	2	0.05122	2	0.01567	2	NA	NA
11	46765676	CKAP5	0.00972202	0.2973	7	0.8766	1	0.4945	4	0.03224	12	0.002108	7
4	145038059	GYPA	0.00972446	0.0001861	3	0.2949	7	0.6793	2	0.2836	3	0.8287	1
19	39292666	LGALS4	0.0097676	0.7518	3	0.2616	2	0.6098	3	0.09345	4	0.0007868	1
15	89056292	DET1	0.00985336	NA	NA	0.6719	4	0.406	4	0.9275	7	0.0001681	2
12	93171826	EEA1	0.00988865	0.7219	5	0.4328	3	0.4538	8	0.0002783	12	0.2275	10
8	142221746	SLC45A4	0.00990213	0.204	10	0.001898	3	0.2619	8	0.1089	11	0.8145	6
19	19625992	TSSK6	0.00996625	NA	NA	NA	NA	0.1242	1	0.0105	1	NA	NA
10	99190891	PGAM1	0.0100086	0.03445	1	NA	NA	NA	NA	0.03804	1	NA	NA
1	177247854	FAM5B	0.0100503	0.9738	3	NA	NA	0.004878	5	0.01077	10	0.8541	4
19	47995358	NAPA	0.0101959	NA	NA	NA	NA	NA	NA	0.35	3	0.003825	2
1	113616048	LRIG2	0.0101991	0.5515	7	0.08383	3	0.1895	6	0.05596	14	0.01915	6
13	48881492	RB1	0.0102224	NA	NA	0.4041	14	0.7828	4	0.01719	6	0.008224	3
4	175413228	HPGD	0.0102683	0.3032	5	NA	NA	NA	NA	0.003174	3	0.2402	3
5	151771817	NMUR2	0.0102765	0.3604	8	0.04017	3	0.07065	4	0.01306	8	0.7106	5
5	160757907	GABRB2	0.0102847	0.00562	2	NA	NA	NA	NA	0.2406	3	NA	NA
6	74072893	KHDC3L	0.0102878	0.04985	1	0.2009	1	0.01352	2	0.09381	3	0.7485	1
7	127014438	ZNF800	0.0104279	0.0023	3	0.0268	1	0.6411	3	0.767	5	0.3199	1
10	4872930	AKR1E2	0.0104301	0.2122	7	NA	NA	NA	NA	0.006476	2	NA	NA
14	101198426	DLK1	0.010436	0.7547	3	0.9712	2	0.5948	6	0.5178	8	4.3e-05	4
7	6502775	KDELR2	0.0104552	0.06751	2	NA	NA	0.05057	2	0.6324	3	0.02136	1
14	23587838	CEBPE	0.010482	NA	NA	NA	NA	0.2973	2	0.0208	3	0.03837	1
9	95869989	C9orf89	0.0105032	0.1395	5	0.09629	1	0.1062	2	0.03741	4	0.1836	2
20	19941396	RIN2	0.0105608	0.007375	3	0.1342	8	0.4296	6	0.2962	7	0.07842	5
1	2106723	PRKCZ	0.0106103	NA	NA	0.9176	1	0.4571	2	0.0005745	1	NA	NA
2	74803718	C2orf65	0.0106757	0.9357	2	0.03587	4	0.5356	4	0.0005669	6	0.9845	3
8	126021414	SQLE	0.0107355	NA	NA	0.5794	1	0.6205	2	0.3619	3	0.0003675	1
7	156979555	UBE3C	0.0107373	0.00201	3	0.2101	4	0.2689	6	0.103	9	0.865	6
19	55879672	IL11	0.0107386	0.2483	3	0.4668	1	0.0003471	2	0.6931	2	0.3629	2
10	102566298	PAX2	0.01076	NA	NA	NA	NA	NA	NA	0.01076	2	NA	NA
14	52171526	FRMD6	0.010792	0.798	4	NA	NA	0.001748	3	0.1062	9	0.3251	5
7	148947862	ZNF212	0.0108469	0.0005777	5	0.05856	3	0.7437	4	0.4926	5	0.8285	4
3	39373902	CCR8	0.01086	0.001636	2	0.4757	2	0.1567	3	0.118	3	0.7148	2
17	58503541	C17orf64	0.0109502	0.3114	3	0.00357	3	0.1932	3	0.05251	4	0.9231	3
14	33004851	AKAP6	0.0109696	2.917e-05	17	0.5357	8	0.7824	19	0.9956	22	0.8575	11
19	55556527	RDH13	0.0109719	0.9151	2	NA	NA	0.7887	5	0.2131	6	0.0003203	6
12	50571691	LIMA1	0.0109978	0.6134	4	0.2417	2	0.6928	4	0.0001082	6	0.9427	3
19	54722250	LILRB3	0.011	NA	NA	0.011	1	NA	NA	NA	NA	NA	NA
2	25650447	DTNB	0.011006	0.07161	5	0.005663	6	0.3194	7	0.1171	11	0.6915	5
19	7734204	RETN	0.0110471	0.8285	1	NA	NA	0.3361	1	0.0001822	2	0.9801	2
7	150745974	ASIC3	0.0111652	0.0001399	10	0.7599	5	0.7303	8	0.3447	13	0.4002	7
19	49793508	SLC6A16	0.0111873	0.6252	4	0.01031	8	0.02453	8	0.1363	12	0.4984	6
17	39114962	KRT39	0.0112212	0.001442	3	0.3527	4	0.7008	5	0.9465	12	0.03198	5
7	129912936	CPA2	0.0112235	0.0003416	5	0.8906	2	0.7172	1	0.2329	7	NA	NA
2	54023133	ERLEC1	0.011238	0.003065	4	0.1118	1	0.3169	5	0.4688	7	NA	NA
5	128797271	ADAMTS19	0.0113669	0.8365	9	0.5453	2	0.003803	7	0.02003	9	0.3164	5
9	136531857	SARDH	0.0113813	0.9188	12	0.635	7	0.1628	8	0.06801	22	0.001705	7
3	46062776	XCR1	0.0113881	0.00968	2	NA	NA	NA	NA	0.1571	2	NA	NA
17	26976071	SDF2	0.0114074	NA	NA	0.07838	1	NA	NA	0.01944	1	NA	NA
2	165755156	SLC38A11	0.0114495	0.9858	5	0.1107	2	0.8281	3	0.006635	7	0.01853	2
2	217542888	IGFBP5	0.0115645	0.8213	3	0.2254	1	NA	NA	0.6468	3	0.0004422	2
9	136501530	DBH	0.0116877	0.8922	15	0.724	13	0.01467	15	0.002629	20	0.4596	18
15	90610517	ZNF710	0.011714	0.3825	5	0.3629	5	0.1833	1	0.002118	4	NA	NA
6	111306307	RPF2	0.0117493	0.002685	3	0.6617	1	NA	NA	0.1544	3	NA	NA
16	129470	MPG	0.0117996	0.001386	6	NA	NA	0.8036	3	0.06815	9	0.7171	5
14	21971569	METTL3	0.011818	0.001514	1	NA	NA	0.5026	2	0.08272	4	0.8666	1
2	160585568	2021-03-07	0.011828	0.251	10	0.5366	2	0.389	3	0.02463	5	0.009029	3
12	91358072	EPYC	0.0118619	0.1248	4	0.6156	1	0.0148	4	0.7024	5	0.01465	3
5	93722036	KIAA0825	0.0118764	0.4826	6	0.7825	9	0.005886	6	0.1541	8	0.03422	5
11	70319250	SHANK2	0.0118852	0.01976	13	0.6368	7	0.03565	11	0.07615	27	0.3435	13
1	154184993	C1orf43	0.0120302	0.6306	2	NA	NA	0.3671	1	0.0009864	2	0.2448	2
1	223980207	TP53BP2	0.0120361	0.07271	4	0.6498	6	0.1415	8	0.002564	12	0.6973	6
1	231829700	DISC1	0.0120839	0.2377	4	0.8043	6	0.003608	9	0.4832	15	0.03607	9
14	64988814	ZBTB1	0.0121312	0.008876	2	NA	NA	0.263	3	0.1224	3	NA	NA
21	33949098	TCP10L	0.0121593	0.02125	2	NA	NA	NA	NA	0.07719	1	NA	NA
7	101928495	SH2B2	0.0121941	NA	NA	NA	NA	0.001839	3	0.8949	2	NA	NA
5	148977507	ARHGEF37	0.0122004	0.001194	7	0.5214	4	0.2151	7	0.3037	12	0.2998	7
9	108363427	FKTN	0.0122521	0.2276	3	0.004965	6	0.1459	3	0.5516	4	0.1349	3
9	140323373	NOXA1	0.0123297	0.3161	2	0.01318	5	0.6455	3	0.005804	7	0.7933	4
4	8368698	ACOX3	0.0124395	0.6562	15	0.06346	5	0.3668	7	0.09852	17	0.008336	7
3	121575986	EAF2	0.0125357	0.4547	2	0.4996	2	0.0005866	2	0.204	3	0.4667	2
9	138903547	NACC2	0.0125516	0.8287	4	0.01518	3	0.05424	1	0.1576	3	0.1182	3
14	23567033	C14orf119	0.01259	0.01259	1	NA	NA	NA	NA	NA	NA	NA	NA
3	142769891	U2SURP	0.01259	NA	NA	0.01259	1	NA	NA	NA	NA	NA	NA
3	100100549	TOMM70A	0.0126249	0.1449	1	0.3026	2	0.002803	2	0.2061	3	0.5061	2
2	128631537	AMMECR1L	0.0126381	0.5469	2	NA	NA	0.6659	1	0.7403	2	0.0002219	1
19	11725465	ZNF627	0.01271	0.01271	2	NA	NA	NA	NA	NA	NA	NA	NA
12	6939626	LEPREL2	0.0129183	0.01813	5	0.6247	5	0.5041	7	0.02467	10	0.09414	5
10	75135899	ANXA7	0.0130254	0.01046	4	0.01707	3	0.4655	6	0.367	10	0.44	4
7	150164111	GIMAP8	0.0130687	0.9468	7	0.39	2	0.1065	7	0.005278	11	0.06498	5
15	42805628	SNAP23	0.01307	0.01307	1	NA	NA	NA	NA	NA	NA	NA	NA
3	129370346	TMCC1	0.0130853	0.001795	2	NA	NA	NA	NA	0.9948	1	NA	NA
2	75891827	GCFC2	0.0131855	0.7442	9	0.2562	5	0.6754	6	0.001674	11	0.06339	8
1	45219435	KIF2C	0.0132252	0.8577	5	NA	NA	0.6127	3	0.2453	4	0.0004941	3
9	108424814	TAL2	0.0132797	0.5671	3	NA	NA	NA	NA	0.003203	3	NA	NA
7	108205125	THAP5	0.01342	NA	NA	NA	NA	NA	NA	0.01342	2	NA	NA
1	86891073	CLCA2	0.0135537	0.02132	10	0.07939	4	0.1596	8	0.3218	16	0.1637	10
20	60348084	CDH4	0.0135682	0.1027	9	0.02106	6	0.9512	13	0.01413	12	0.4903	9
8	22550335	EGR3	0.0136349	0.001985	1	NA	NA	0.9435	1	NA	NA	NA	NA
6	112430669	LAMA4	0.0136582	0.07828	13	0.003572	11	0.7354	16	0.2692	25	0.26	10
10	93811989	CPEB3	0.0137195	0.0003905	3	0.3463	2	0.74	4	0.5486	5	0.2639	4
6	20488374	E2F3	0.0138368	0.4012	2	0.9376	3	0.2883	2	0.000362	4	0.3737	3
7	140710396	MRPS33	0.0138723	NA	NA	NA	NA	NA	NA	0.606	1	0.003153	1
21	46875586	COL18A1	0.0138832	0.4948	17	0.00512	15	0.4756	15	0.1804	30	0.06783	12
11	119043656	NLRX1	0.0138903	0.138	15	0.1502	7	0.8964	12	0.1695	20	0.004685	12
15	75108636	LMAN1L	0.0139372	0.1659	5	0.01734	1	0.02057	5	0.298	7	0.8409	6
4	154279752	MND1	0.0140148	0.02003	1	NA	NA	NA	NA	0.09653	4	NA	NA
1	67507941	SLC35D1	0.0140304	0.6658	2	0.0001572	3	0.7561	3	0.2087	5	0.9067	3
5	80724487	SSBP2	0.0140581	0.2406	4	NA	NA	0.3721	1	0.5786	3	0.001338	1
16	77756501	NUDT7	0.0141007	0.7582	4	0.0541	3	0.308	2	0.9235	7	0.001293	5
20	43850400	SEMG2	0.0141137	0.001708	6	0.1333	3	0.7363	4	0.7209	9	0.125	6
1	11804590	AGTRAP	0.0141878	NA	NA	0.3664	2	0.3038	1	0.0195	2	0.03234	3
6	109787211	ZBTB24	0.014197	0.002352	5	0.5756	3	0.5199	5	0.2363	6	0.09162	4
1	32834055	BSDC1	0.0141973	0.6306	4	0.003051	1	0.041	3	0.4176	4	0.4626	1
1	26365751	SLC30A2	0.0142393	NA	NA	0.01139	1	0.05934	2	0.5189	4	NA	NA
1	156213701	PAQR6	0.0143808	0.04823	5	0.01915	1	0.05386	1	0.5288	6	0.5904	3
3	149192678	TM4SF4	0.0143812	0.1461	2	NA	NA	NA	NA	0.4151	3	0.005857	2
9	107360769	OR13C5	0.0143977	0.001486	2	0.1663	2	NA	NA	0.3348	5	0.8659	3
1	1551927	MIB2	0.0143984	0.0628	6	0.07995	3	0.08448	8	0.1512	13	0.2426	5
6	29364508	OR12D2	0.0144344	0.1456	3	0.0035	5	0.1563	6	0.4946	6	0.3964	4
16	88620195	C16orf85	0.01452	0.01452	1	NA	NA	NA	NA	NA	NA	NA	NA
10	104210861	C10orf95	0.01456	NA	NA	NA	NA	NA	NA	0.01456	1	NA	NA
7	5983079	RSPH10B	0.0146035	0.4753	1	0.2975	3	NA	NA	0.002562	2	NA	NA
10	13213215	MCM10	0.0147085	0.4937	8	0.2606	3	0.006195	2	0.02765	5	0.7286	6
12	53900640	NPFF	0.0147537	NA	NA	0.1812	1	0.003423	2	0.5918	3	NA	NA
1	158669538	OR6K2	0.0147553	0.5493	9	NA	NA	0.1454	7	0.01736	10	0.05346	3
13	107211797	ARGLU1	0.01481	NA	NA	NA	NA	NA	NA	0.01481	1	NA	NA
7	131189105	PODXL	0.0150064	0.6158	8	0.4042	3	0.09607	8	0.002305	7	0.3001	6
4	8021340	ABLIM2	0.0150138	NA	NA	0.9017	5	0.5706	5	0.0002564	6	0.5756	4
8	41364598	GOLGA7	0.01502	0.01502	1	NA	NA	NA	NA	NA	NA	NA	NA
2	54096563	PSME4	0.0151609	0.03218	7	0.9366	1	0.005627	6	0.2066	12	0.4793	7
1	172501617	SUCO	0.0151926	0.1474	3	0.6728	4	0.158	4	0.3525	8	0.00305	2
19	2916111	ZNF57	0.0152294	0.004168	8	0.8624	3	0.631	2	0.008942	7	0.8336	4
14	21250124	RNASE6	0.0152424	0.5301	1	NA	NA	NA	NA	0.004021	2	NA	NA
3	139237264	RBP1	0.0152466	NA	NA	NA	NA	0.005695	1	0.3744	1	NA	NA
2	211060050	ACADL	0.0152752	0.8484	3	NA	NA	0.01092	2	0.04143	5	NA	NA
8	71619374	XKR9	0.0155025	0.5534	5	0.7233	3	0.3807	8	0.0002889	8	0.3943	6
5	43246022	AC114947.1	0.0157931	0.007043	4	0.1919	2	0.2156	3	0.3387	3	0.1808	2
16	85667568	KIAA0182	0.0157935	0.6973	14	0.002449	7	0.015	8	0.8001	20	0.8707	10
16	1584556	TMEM204	0.0158221	0.1427	4	NA	NA	NA	NA	0.0156	3	NA	NA
10	91198917	SLC16A12	0.0159504	NA	NA	0.0009765	1	0.8696	3	0.4779	6	NA	NA
20	23669488	CST4	0.01606	NA	NA	NA	NA	NA	NA	0.01606	2	NA	NA
17	37922259	IKZF3	0.0160756	0.001073	5	0.5782	2	0.04764	1	0.8531	4	0.7266	2
9	135285840	C9orf171	0.0161754	0.305	6	0.1673	3	0.6505	5	0.004179	7	0.1333	3
13	20978318	CRYL1	0.016209	0.07164	2	NA	NA	0.1046	2	0.05529	5	NA	NA
6	49439805	CENPQ	0.0162807	0.4464	1	0.2827	2	0.6231	2	0.001081	3	NA	NA
20	57875916	EDN3	0.0163	NA	NA	NA	NA	NA	NA	0.0163	2	NA	NA
10	38343772	ZNF33A	0.0163068	0.0008918	5	0.8452	5	0.1401	3	0.2257	6	0.7852	3
15	78880752	CHRNA5	0.0163304	0.442	4	NA	NA	0.7486	5	0.4641	8	0.0005559	4
17	43332648	TEX34	0.0163734	0.01326	1	NA	NA	0.341	2	0.09283	4	NA	NA
16	67429390	ZDHHC1	0.0164109	0.000506	3	NA	NA	0.425	3	0.4019	3	0.9945	2
5	68485592	CENPH	0.0164907	0.0447	3	0.084	2	0.03382	1	0.8109	2	0.1848	1
2	172822320	HAT1	0.0166465	0.2725	2	0.008667	2	NA	NA	NA	NA	NA	NA
11	61179392	CPSF7	0.0166723	0.3438	1	NA	NA	NA	NA	0.006882	2	NA	NA
3	15497520	COLQ	0.0167926	0.002575	6	0.3149	5	0.6153	3	0.1779	5	NA	NA
11	33308079	HIPK3	0.0168706	0.714	5	0.1694	3	0.003727	8	0.3568	14	0.1224	8
8	125988712	ZNF572	0.0168847	0.1993	7	0.0606	1	0.04772	3	0.2385	10	0.1434	3
9	90254576	DAPK1	0.0169578	0.01325	5	0.2923	6	0.0387	7	0.1681	12	0.7874	6
2	238002837	COPS8	0.016977	0.03434	1	NA	NA	NA	NA	0.07037	2	NA	NA
19	8131003	FBN3	0.0170072	0.07656	53	0.03152	21	0.1897	40	0.06848	71	0.6356	32
16	30435651	DCTPP1	0.01713	0.01713	2	NA	NA	NA	NA	NA	NA	NA	NA
13	114077172	ADPRHL1	0.0171403	0.324	5	0.7671	1	0.3126	2	0.00127	5	0.2043	3
14	81945991	SEL1L	0.0172865	0.145	4	0.1661	3	0.5833	4	0.2243	9	0.006479	7
1	15953261	DDI2	0.0173147	0.0684	2	NA	NA	NA	NA	0.03615	1	NA	NA
20	32856839	ASIP	0.01736	0.01736	1	NA	NA	NA	NA	NA	NA	NA	NA
17	78968905	CHMP6	0.01736	NA	NA	0.01736	1	NA	NA	NA	NA	NA	NA
19	14522323	DDX39A	0.0174364	0.7194	2	NA	NA	0.2325	2	0.002722	3	NA	NA
4	83860883	LIN54	0.017477	0.04941	1	NA	NA	0.3117	2	0.04206	1	0.1449	3
12	11061122	TAS2R13	0.0175366	0.007245	3	0.1502	1	0.2849	1	0.3042	3	NA	NA
3	43121449	GTDC2	0.0175469	0.8874	13	NA	NA	0.1714	6	0.0518	15	0.01198	8
19	4844790	PLIN3	0.0175621	0.3855	5	0.625	1	0.07553	3	0.00135	5	0.8509	2
19	30164754	PLEKHF1	0.0176178	0.01555	4	NA	NA	0.5306	2	0.04413	3	0.2607	4
21	47746375	PCNT	0.0176372	0.4321	44	0.5894	15	0.1912	28	0.4034	55	0.001071	30
13	48571013	SUCLA2	0.0176379	NA	NA	0.6908	1	0.3157	4	0.3449	5	0.001264	5
2	61420088	USP34	0.0176477	0.2762	9	0.08315	6	0.5487	16	0.06692	21	0.02497	9
5	141993631	FGF1	0.0176684	0.5942	1	0.2065	3	0.2208	2	0.08163	3	0.009538	2
1	151131470	TNFAIP8L2	0.0178322	0.001891	2	0.2433	1	0.4802	2	0.437	2	NA	NA
19	1003172	GRIN3B	0.0178772	0.02638	8	0.01814	4	0.5848	3	0.8606	8	0.08914	2
5	177577923	NHP2	0.0178972	NA	NA	NA	NA	0.06702	1	0.03067	3	0.2291	2
15	90794102	RP11-697E2.6	0.0179894	NA	NA	0.2246	2	0.009691	3	0.2178	6	NA	NA
22	45740462	SMC1B	0.0180234	0.2752	7	0.8555	2	0.1019	7	0.04423	12	0.02048	4
4	70723299	SULT1E1	0.0180767	NA	NA	NA	NA	0.5845	1	0.02376	2	0.03435	1
19	54802693	LILRA3	0.0180862	0.02544	4	0.3675	3	NA	NA	0.05106	3	NA	NA
5	43543191	PAIP1	0.01809	0.01809	1	NA	NA	NA	NA	NA	NA	NA	NA
9	80858484	CEP78	0.0181092	0.4904	3	0.4656	6	0.04591	5	0.7864	7	0.002655	5
7	57528672	ZNF716	0.01816	0.01816	1	NA	NA	NA	NA	NA	NA	NA	NA
6	31709045	MSH5	0.0182905	0.1591	6	0.0003098	4	0.9525	4	0.635	9	0.7452	2
6	31709045	MSH5-SAPCD1	0.0182905	0.1591	6	0.0003098	4	0.9525	4	0.635	9	0.7452	2
9	8341267	PTPRD	0.0184373	0.9678	10	0.2513	6	0.004744	10	0.1696	23	0.1149	6
12	50232169	BCDIN3D	0.0184509	0.000875	2	0.3956	5	0.9547	3	0.07931	6	0.8588	5
1	63063616	ANGPTL3	0.0184847	NA	NA	NA	NA	NA	NA	0.01092	6	0.2444	2
11	113194069	TTC12	0.0185039	0.1148	9	0.7051	4	0.02235	7	0.07269	18	0.1719	5
13	77581510	FBXL3	0.01854	0.01854	2	NA	NA	NA	NA	NA	NA	NA	NA
15	78466127	ACSBG1	0.0185474	0.09359	5	0.4513	4	0.6087	4	0.1112	9	0.007935	4
17	39777047	JUP	0.0185762	0.05911	10	0.6397	14	0.009758	4	0.2117	8	0.2911	5
12	12509865	LOH12CR2	0.01864	NA	NA	0.01864	1	NA	NA	NA	NA	NA	NA
11	71169475	NADSYN1	0.0187565	0.09601	12	0.0257	7	0.8017	9	0.1092	13	0.1068	8
13	113669142	MCF2L	0.0188219	0.009028	12	0.1638	19	0.2755	17	0.1067	22	0.5335	13
6	41126505	TREM2	0.0188246	0.0567	6	0.03302	3	0.1156	4	0.122	8	0.8785	4
9	132481549	PRRX2	0.0188319	0.8827	4	NA	NA	NA	NA	0.00309	3	NA	NA
1	6378607	ACOT7	0.018895	0.7579	3	0.006401	2	0.2698	1	0.08001	1	NA	NA
5	123980107	ZNF608	0.0190137	0.1493	6	0.4595	2	0.1242	7	0.00495	10	0.5583	5
14	52899036	TXNDC16	0.0191386	0.08905	6	0.004859	8	0.1975	12	0.3268	17	0.8515	10
10	17275596	VIM	0.0191394	0.854	2	0.9141	1	NA	NA	0.0006581	4	NA	NA
7	100211150	MOSPD3	0.0191527	0.2572	3	0.5796	5	0.006336	4	0.3432	6	0.07344	3
20	42086724	SRSF6	0.0192518	NA	NA	0.8521	2	0.3413	1	0.00178	3	NA	NA
5	140558528	PCDHB8	0.0192835	0.9141	2	NA	NA	0.4248	1	0.6028	3	0.0004604	2
3	112724471	C3orf17	0.0193683	0.8426	5	0.794	6	0.02985	7	0.5294	12	0.00229	7
1	153390542	S100A7A	0.0193838	0.3281	2	0.5275	1	NA	NA	0.001259	2	0.4982	1
11	43904691	ALKBH3	0.0193924	0.7777	3	0.02289	4	0.173	5	0.08764	7	0.08987	5
6	28358680	ZSCAN12	0.0194009	0.05976	2	0.8785	6	0.004136	1	0.2578	1	0.4336	1
20	62187231	C20orf195	0.0194035	0.3817	3	0.05652	3	0.006111	3	0.8246	5	NA	NA
19	55742215	PPP6R1	0.0194283	0.1507	10	0.1559	8	0.327	12	0.007943	16	0.3986	11
15	78582044	WDR61	0.01962	NA	NA	0.01962	1	NA	NA	NA	NA	NA	NA
18	22048821	HRH4	0.0197159	0.8819	3	NA	NA	0.8885	1	0.01048	5	0.01354	3
5	40764876	PRKAA1	0.01972	NA	NA	NA	NA	NA	NA	NA	NA	0.01972	1
1	154897717	PMVK	0.0198183	0.02387	4	0.4772	1	0.0459	3	0.0598	6	0.8016	3
17	7462555	TNFSF13	0.0198429	0.003616	2	NA	NA	NA	NA	0.8019	1	NA	NA
6	50807934	TFAP2B	0.0199135	0.5702	2	0.2842	1	0.1142	1	0.1484	3	0.009192	1
1	68171235	GNG12	0.0199176	NA	NA	0.003275	1	NA	NA	0.8893	1	NA	NA
18	44030346	RNF165	0.01992	0.01992	2	NA	NA	NA	NA	NA	NA	NA	NA
13	21306070	N6AMT2	0.0199383	NA	NA	0.1433	1	0.08525	1	0.04435	2	NA	NA
20	10386013	MKKS	0.0199571	0.3002	8	0.1295	5	0.02053	5	0.5247	6	0.06048	4
9	136233510	SURF4	0.0200422	0.2269	1	NA	NA	NA	NA	0.01293	2	NA	NA
15	50867290	TRPM7	0.0201558	0.02814	6	0.2146	5	0.01276	9	0.4519	13	0.7383	4
3	67053926	KBTBD8	0.0202683	0.0786	1	0.4491	2	0.1136	3	0.1938	5	0.03336	3
17	42328621	SLC4A1	0.0202803	0.009905	6	0.7514	10	0.01407	7	0.6763	11	0.3664	8
9	5231539	INSL4	0.0203833	0.9034	2	0.9766	2	0.005629	3	0.5299	7	0.009936	2
19	9524439	ZNF266	0.0204829	0.008204	4	0.8068	5	0.07043	6	0.07481	6	0.7553	3
14	100847320	WDR25	0.0204872	0.2962	6	0.9478	3	0.7399	5	0.7787	8	0.0001629	7
19	10798066	ILF3	0.0206199	0.9685	2	0.1375	1	0.2549	2	0.00355	5	0.2208	2
1	155160941	MUC1	0.020725	0.2654	2	0.3649	2	0.002116	4	0.5278	3	0.2479	2
9	27168571	TEK	0.0207691	0.8737	6	0.06606	4	0.1748	3	0.2586	9	0.01031	2
3	185146527	MAP3K13	0.0209347	0.06853	5	0.4512	6	0.03043	8	0.03318	14	0.872	8
6	47251758	TNFRSF21	0.0209489	0.7669	3	0.1195	4	0.5894	6	0.005199	12	0.09704	6
3	12950002	IQSEC1	0.0210056	0.001387	5	0.691	4	0.1328	7	0.7398	13	0.2906	9
4	47455227	COMMD8	0.0210312	0.1932	1	0.06891	3	0.008072	2	0.3297	4	0.7737	3
17	64728897	PRKCA	0.021038	0.997	2	0.6693	1	0.01492	1	0.01224	2	NA	NA
10	44052431	ZNF239	0.0211335	0.1161	4	NA	NA	0.00731	3	0.3784	8	0.3819	2
12	31446744	FAM60A	0.0211353	0.7176	1	NA	NA	NA	NA	0.004351	1	NA	NA
12	66546100	RP11-745O10.4	0.0212677	NA	NA	0.8658	2	0.6887	2	0.1904	2	0.00109	3
12	48596127	OR10AD1	0.0212694	0.997	5	0.1208	1	0.003545	4	0.1145	7	0.5704	2
5	158702232	UBLCP1	0.0213	NA	NA	NA	NA	NA	NA	0.0213	2	NA	NA
19	56693562	GALP	0.0213677	NA	NA	0.2986	1	0.766	1	0.006659	1	0.08179	1
21	45929146	TSPEAR	0.0213955	0.003568	11	0.3308	10	0.1675	15	0.825	15	0.1725	12
10	103530135	FGF8	0.0214054	0.01478	3	0.2315	2	0.1737	1	NA	NA	NA	NA
11	61015916	PGA4	0.02147	NA	NA	0.02147	2	NA	NA	NA	NA	NA	NA
11	61015916	PGA5	0.02147	NA	NA	0.02147	2	NA	NA	NA	NA	NA	NA
11	116728636	SIK3	0.0214996	0.4541	4	0.9963	2	0.00408	2	0.04075	6	0.3768	3
17	31260307	TMEM98	0.0215	NA	NA	NA	NA	NA	NA	0.0215	2	NA	NA
8	139163791	FAM135B	0.0215206	0.007523	9	0.3496	3	0.3773	9	0.1576	17	0.1815	9
19	58639808	ZNF329	0.0215225	0.6501	2	0.08466	5	0.009394	2	0.1176	6	0.4669	2
20	61341092	NTSR1	0.021651	0.495	5	0.03864	6	0.005747	10	0.4715	14	0.5527	9
14	24040436	JPH4	0.02166	NA	NA	NA	NA	NA	NA	0.02166	2	NA	NA
8	67341714	RRS1	0.0218201	0.6433	5	0.419	6	0.8717	5	0.01049	7	0.01176	5
2	55054839	EML6	0.0218801	0.04341	8	0.7945	6	0.2814	13	0.01998	15	0.1501	12
19	17735631	UNC13A	0.0219164	0.000606	7	0.966	5	0.09235	5	0.8253	8	0.654	4
12	56142670	GDF11	0.0220721	NA	NA	0.9962	1	0.7444	1	0.1066	1	0.00165	1
6	42153428	GUCA1B	0.022077	0.7531	2	0.3495	2	NA	NA	0.002351	6	NA	NA
1	222801868	MIA3	0.0220883	0.4767	7	0.2867	8	0.6427	12	0.05763	20	0.005833	11
15	72118997	MYO9A	0.0221087	0.6209	16	0.01671	10	0.6897	18	0.5442	33	0.007593	16
9	32541740	TOPORS	0.0221312	0.06637	3	0.1377	5	0.03587	6	0.1393	12	0.6485	7
11	124179839	OR8D1	0.0221592	0.1312	6	0.08187	3	0.7717	3	0.01633	6	0.2192	4
16	74657885	RFWD3	0.0222464	0.4325	6	0.8631	1	0.009897	1	0.01321	7	0.6116	2
17	27225709	DHRS13	0.0222813	0.8307	5	0.09165	1	0.9657	4	0.001798	4	NA	NA
16	31099000	RP11-196G11.1	0.0222931	0.3361	1	0.001536	2	NA	NA	0.3198	2	0.8013	2
17	3631241	ITGAE	0.0223287	0.2739	5	0.01036	11	0.7673	9	0.0253	13	0.5449	7
20	39974453	LPIN3	0.0223331	0.0005386	14	0.1384	4	0.5279	13	0.766	18	0.9961	7
18	618067	CLUL1	0.0223876	NA	NA	NA	NA	0.09308	3	0.03589	6	NA	NA
7	44714134	OGDH	0.0224007	0.9785	3	0.1572	3	0.008238	7	0.2822	6	0.08435	3
17	43212963	ACBD4	0.0226242	0.003953	3	NA	NA	NA	NA	0.8556	3	NA	NA
2	62054286	FAM161A	0.022649	0.4908	5	0.6561	3	0.04535	7	0.1496	10	0.01404	8
6	138539187	PBOV1	0.0226781	0.008909	2	NA	NA	NA	NA	0.3807	2	NA	NA
1	43212680	LEPRE1	0.0228321	0.5272	9	0.4301	6	0.2388	8	0.1777	9	0.003227	5
12	113633532	IQCD	0.0228339	0.4393	2	0.1135	4	0.5962	3	0.9987	5	0.001046	3
2	37319156	CCDC75	0.0228523	0.1242	2	NA	NA	0.1456	1	0.0358	3	NA	NA
2	233391303	CHRND	0.0229121	0.4318	4	0.4167	8	0.09003	8	0.00195	9	0.9882	6
19	11210912	LDLR	0.0229357	0.3164	9	0.2548	187	0.7053	4	0.001001	11	0.5493	4
1	100174455	FRRS1	0.0229515	0.0004774	7	0.1537	3	0.903	4	0.7399	10	0.6384	4
3	119530571	NR1I2	0.0229805	0.7818	2	0.05855	2	0.3195	2	0.1537	4	0.01395	2
13	36878564	SPG20	0.0231038	0.09771	5	0.01161	1	0.06031	2	0.9728	3	0.475	3
19	6422423	KHSRP	0.0231621	0.001134	1	NA	NA	0.277	1	0.5616	1	0.7918	2
15	33603263	RYR3	0.023246	0.6548	26	0.05313	22	0.004309	29	0.4839	53	0.4399	29
6	12292615	EDN1	0.0232714	0.001559	3	0.6412	2	0.3685	3	0.102	5	0.8507	4
11	6423826	APBB1	0.0233852	0.05453	4	0.7462	5	0.02415	4	0.03774	5	0.8683	6
5	176885388	DBN1	0.0234009	0.3891	3	0.005726	2	0.7903	5	0.06701	5	0.2732	4
5	68715310	MARVELD2	0.0234152	0.04738	4	0.473	6	0.005303	6	0.3068	7	0.8849	4
5	175926081	FAF2	0.0235	NA	NA	NA	NA	NA	NA	0.0235	1	NA	NA
17	44039717	MAPT	0.0235154	0.1521	9	0.4754	7	0.4271	6	0.02298	12	0.04576	7
2	218937209	RUFY4	0.0235355	0.01864	9	0.6895	4	0.02724	8	0.9543	13	0.09733	6
1	215781472	KCTD3	0.0235474	NA	NA	0.3351	2	0.08801	3	0.01335	2	0.3632	3
20	61451305	COL9A3	0.0236213	0.9295	11	0.2797	4	0.2212	7	0.05304	16	0.01072	6
2	238475278	PRLH	0.0236356	0.2601	2	NA	NA	NA	NA	0.01369	2	NA	NA
20	23472317	CST8	0.0236728	0.1974	4	NA	NA	0.02115	3	0.1624	6	NA	NA
3	52721305	GNL3	0.0236748	0.01898	7	0.02873	2	0.4172	4	0.9111	11	0.1583	6
11	65360606	KCNK7	0.0238497	0.6731	3	NA	NA	0.8824	2	0.5682	3	0.0004315	2
3	186257331	CRYGS	0.0238869	0.007337	1	NA	NA	NA	NA	0.4914	2	NA	NA
10	90668488	STAMBPL1	0.0239746	0.6985	6	0.07328	2	0.006269	3	0.3344	4	0.3117	2
6	29911183	HLA-A	0.0239875	NA	NA	0.7569	1	NA	NA	0.004787	1	NA	NA
15	74631619	CYP11A1	0.0240246	0.7966	3	0.1879	4	0.3746	5	0.4885	7	0.001225	5
22	45683200	UPK3A	0.0240267	0.8622	4	0.001587	2	0.295	5	0.1511	10	0.5502	4
5	24498542	CDH10	0.0240752	0.0383	1	0.0193	2	0.4497	2	0.1766	3	0.5734	3
3	50338021	HYAL1	0.0241132	0.5661	4	0.6472	2	0.05387	4	0.01091	6	0.1567	4
4	55127448	PDGFRA	0.0241209	0.04823	5	0.2632	12	0.7449	7	0.005117	10	0.6977	3
20	31022469	ASXL1	0.0242322	0.1634	8	0.3995	6	0.01155	10	0.2387	26	0.1889	13
12	121002888	RNF10	0.0242906	0.2586	1	0.02418	4	0.6489	5	0.605	10	0.0139	3
12	15102799	ARHGDIB	0.0243668	NA	NA	0.02331	1	0.8666	1	0.02571	1	0.2891	2
17	17248203	NT5M	0.0244432	0.1113	2	0.8431	1	0.002831	1	0.5146	3	0.252	2
9	114304164	ZNF483	0.0245419	0.01494	3	NA	NA	NA	NA	0.5153	5	0.09234	3
12	64668746	C12orf56	0.0245483	0.4553	2	0.004253	5	0.3846	3	0.08987	8	0.5181	1
11	64074743	ESRRA	0.02455	NA	NA	0.02455	1	NA	NA	NA	NA	NA	NA
1	43647424	WDR65	0.0245787	0.0769	7	0.06243	5	0.7056	6	0.06801	13	0.1508	7
5	79949873	DHFR	0.02467	NA	NA	0.02467	1	NA	NA	NA	NA	NA	NA
15	65345387	SLC51B	0.02469	NA	NA	NA	NA	NA	NA	0.02469	3	NA	NA
18	9886890	TXNDC2	0.0247222	NA	NA	0.01723	1	NA	NA	0.2179	6	NA	NA
17	3343611	RP11-147K16.2	0.0249695	0.009345	4	NA	NA	NA	NA	0.4065	5	NA	NA
17	3343611	SPATA22	0.0249695	0.009345	4	NA	NA	NA	NA	0.4065	5	NA	NA
20	1099523	PSMF1	0.025038	0.9865	5	0.8861	3	0.4717	4	0.0001555	6	0.5574	3
11	32413538	WT1	0.0251985	NA	NA	0.4432	12	NA	NA	0.008664	1	NA	NA
11	864473	TSPAN4	0.0252072	0.001433	4	0.2319	6	0.2392	3	0.4828	4	0.9409	3
17	38028598	ZPBP2	0.0252269	0.07446	2	0.3552	1	0.03257	3	0.05031	7	0.8342	3
21	27840878	CYYR1	0.0252297	0.6108	4	0.0001493	2	0.7315	2	0.754	3	0.7189	1
1	59787350	FGGY	0.0255663	0.02925	6	0.373	5	0.8223	8	0.004864	14	0.8456	5
2	27720442	GCKR	0.0255839	0.917	7	0.06956	14	0.07229	11	0.008839	17	0.9063	7
21	42694870	FAM3B	0.0256044	0.9685	3	NA	NA	NA	NA	0.08184	5	0.009483	3
20	47567921	ARFGEF2	0.0257422	0.207	3	0.5339	6	0.219	4	0.0148	13	0.1041	7
8	121466092	MTBP	0.0257447	0.2275	7	0.3592	1	0.9975	8	0.1071	13	0.004272	7
8	86351997	CA3	0.02585	0.02029	1	0.07287	1	NA	NA	0.5148	2	NA	NA
3	138218956	CEP70	0.0258803	0.8412	2	0.8964	4	0.2508	5	0.07833	9	0.002538	5
4	55561861	KIT	0.0258837	0.6966	5	0.01994	16	0.4119	5	0.01172	9	0.5608	3
14	93652681	TMEM251	0.0260026	0.1776	3	0.0461	3	0.9431	3	0.04558	4	0.1076	3
1	46774783	UQCRH	0.02607	0.02607	2	NA	NA	NA	NA	NA	NA	NA	NA
10	104632301	AS3MT	0.0261955	0.008012	1	0.2189	4	0.2187	4	0.1877	6	0.532	5
1	901922	PLEKHN1	0.0263991	0.096	7	0.003912	8	0.5384	8	0.6246	20	0.3069	10
16	31447140	ZNF843	0.0264074	0.01731	3	0.5337	1	NA	NA	0.08474	1	NA	NA
6	136882715	MAP3K5	0.026475	0.7719	7	0.5229	3	0.0006068	1	0.6903	7	NA	NA
1	40874410	SMAP2	0.0265032	NA	NA	0.006708	3	0.3032	3	0.1964	6	0.4239	4
11	533553	HRAS	0.02651	NA	NA	0.02651	3	NA	NA	NA	NA	NA	NA
3	42727348	KBTBD5	0.0265323	0.6356	6	0.001636	2	0.1954	5	0.4105	12	0.4683	6
12	39096717	CPNE8	0.02661	0.02661	2	NA	NA	NA	NA	NA	NA	NA	NA
1	206239549	C1orf186	0.0266732	0.1373	2	0.01212	2	NA	NA	0.4767	3	NA	NA
10	76995102	COMTD1	0.026976	0.09404	2	NA	NA	0.6748	1	0.01594	3	0.1717	2
6	97246356	GPR63	0.0269936	0.001815	5	0.392	1	0.2611	3	0.9358	4	NA	NA
1	167905024	MPC2	0.027011	NA	NA	0.1193	2	0.03537	3	0.8103	3	0.05089	2
12	110784210	ATP2A2	0.0270367	0.003289	1	0.07684	3	0.3273	3	0.7097	5	0.6849	3
2	172926226	METAP1D	0.0270852	0.08321	2	0.3963	4	0.003205	7	0.6661	7	0.5727	4
6	73951389	KHDC1	0.0271157	0.08612	2	0.08724	2	0.4827	3	0.08117	6	0.1372	3
5	74986308	POC5	0.0271177	0.0406	4	0.3385	2	0.02132	2	0.2991	8	0.4609	3
12	110205831	FAM222A	0.0272337	0.7893	2	0.6998	1	0.7349	4	0.01516	6	0.006607	3
3	38080717	DLEC1	0.0273061	0.03541	16	0.6844	11	0.8312	18	0.01921	45	0.1055	27
7	22985435	FAM126A	0.0273268	0.1011	6	NA	NA	0.7758	4	0.003868	11	0.5832	4
1	46511746	PIK3R3	0.0273976	0.01815	4	0.04072	1	0.2924	4	0.279	3	0.6806	4
17	79993919	DCXR	0.0274036	0.1106	2	0.6797	1	0.001027	1	0.5431	3	0.979	1
7	157160173	DNAJB6	0.0274591	0.8085	1	NA	NA	0.318	1	0.003206	3	NA	NA
19	58198887	AC004017.1	0.0274802	0.2605	1	0.01633	1	NA	NA	NA	NA	NA	NA
2	189914122	COL5A2	0.0274835	0.9683	11	0.4196	4	0.9528	8	0.0006325	17	0.1684	10
19	14674472	TECR	0.02751	0.02751	1	NA	NA	NA	NA	NA	NA	NA	NA
6	37451032	CCDC167	0.0275304	0.004782	1	NA	NA	NA	NA	0.8915	2	NA	NA
12	52282078	ANKRD33	0.0275585	0.8209	7	0.4108	3	0.007997	6	0.03379	9	0.4544	3
4	4276124	LYAR	0.0276429	0.03669	5	0.2483	1	0.8617	5	0.5502	7	0.009632	2
6	40996173	UNC5CL	0.0276632	0.09435	7	0.4627	7	0.1523	5	0.009173	10	0.6829	7
16	31485553	TGFB1I1	0.02771	0.02771	1	NA	NA	NA	NA	NA	NA	NA	NA
5	36195305	NADKD1	0.0278762	0.4925	2	NA	NA	0.523	2	0.222	6	0.003184	3
16	75327916	CFDP1	0.0278887	NA	NA	0.9721	7	0.3876	5	0.01287	6	0.03757	5
20	55904961	SPO11	0.0278933	0.6361	1	0.1913	3	0.7324	5	0.4049	8	0.001169	3
1	117249108	C1orf137	0.02792	NA	NA	0.02792	1	NA	NA	NA	NA	NA	NA
19	19291568	MEF2BNB	0.02803	NA	NA	NA	NA	NA	NA	0.02803	1	NA	NA
19	19291568	MEF2BNB-MEF2B	0.02803	NA	NA	NA	NA	NA	NA	0.02803	1	NA	NA
12	31944944	H3F3C	0.02804	NA	NA	NA	NA	NA	NA	0.02804	2	NA	NA
19	49244220	IZUMO1	0.0280427	0.4072	2	0.05704	2	0.5039	3	0.5146	6	0.007062	2
7	30693081	CRHR2	0.028048	0.06363	11	0.4579	3	0.329	5	0.1215	8	0.03653	6
5	176734647	MXD3	0.0280806	0.6598	1	0.07242	1	NA	NA	0.02156	3	0.1786	2
12	10958658	TAS2R8	0.0280907	0.9995	5	0.3162	5	0.08653	4	0.2026	5	0.007697	3
19	39689877	NCCRP1	0.0281591	NA	NA	NA	NA	0.005714	2	0.7663	6	NA	NA
11	62445052	UBXN1	0.0281698	0.8138	4	0.6573	2	0.1355	2	0.004735	3	0.1248	2
4	68691524	TMPRSS11D	0.0282163	0.001294	3	0.2155	4	0.7348	2	0.9042	4	NA	NA
13	73336100	DIS3	0.0282218	0.02416	10	0.07913	4	0.1832	6	0.2831	18	0.4332	6
10	99527530	SFRP5	0.0282935	0.3102	2	0.007462	3	0.1934	4	0.4155	5	NA	NA
1	29447509	TMEM200B	0.0283974	0.02726	1	NA	NA	0.07417	1	0.4262	1	NA	NA
11	22399189	SLC17A6	0.0284057	0.5702	3	0.2635	2	0.2693	2	0.03163	3	0.0339	2
3	36756863	DCLK3	0.0284569	NA	NA	0.08428	2	0.2528	7	0.1148	7	0.07668	4
17	40841014	CNTNAP1	0.0285715	0.2425	7	0.3018	3	0.8978	5	0.008062	9	0.08264	5
7	76054372	ZP3	0.0286167	0.01424	3	0.03956	3	0.4942	4	0.4381	3	0.3598	4
16	58538309	NDRG4	0.0286474	0.7103	4	0.1056	2	0.03067	2	0.4602	3	0.04152	1
4	57389891	ARL9	0.0287645	0.01785	1	0.2024	2	0.5293	2	0.09961	3	NA	NA
11	123810502	OR4D5	0.0287722	0.689	4	0.05346	2	0.5378	3	0.3471	8	0.006436	4
1	114340502	RSBN1	0.0288134	NA	NA	0.3021	1	0.4377	1	0.002718	1	0.5313	1
11	68475966	MTL5	0.0288418	0.03914	4	0.5443	2	0.8408	6	0.04485	6	0.05529	5
19	58790675	AC010642.1	0.02889	NA	NA	0.02889	1	NA	NA	NA	NA	NA	NA
2	232070959	ARMC9	0.0291654	0.1825	9	0.9175	5	0.8983	7	0.8939	12	0.0003361	4
4	40245517	RHOH	0.0292112	0.08781	1	NA	NA	NA	NA	0.05208	1	NA	NA
1	205764484	SLC41A1	0.0292482	0.002769	3	0.619	1	NA	NA	0.5228	2	NA	NA
2	158114694	GALNT5	0.0292499	0.4094	7	0.9325	6	0.001777	7	0.2697	15	0.2481	8
17	56327915	LPO	0.0293091	0.01071	5	0.5715	6	0.8463	4	0.01618	12	0.5433	5
7	94174959	CASD1	0.0293679	0.27	3	0.03214	2	0.04183	9	0.3301	10	0.3812	8
17	35872924	DUSP14	0.0293893	0.3549	1	NA	NA	0.425	2	0.4361	1	0.002987	1
1	157648543	FCRL3	0.0293917	0.1722	15	0.2646	7	0.03156	8	0.07947	18	0.4002	8
12	53825178	AMHR2	0.0294368	0.7447	2	0.2189	2	NA	NA	0.005544	3	NA	NA
19	44833851	CTC-512J12.6	0.0294697	NA	NA	0.8847	1	0.06115	1	0.006293	2	0.5794	1
1	11906068	NPPA	0.029547	NA	NA	NA	NA	0.3544	1	0.01308	2	NA	NA
6	29080041	OR2J3	0.029615	0.0938	2	0.01048	2	NA	NA	0.9628	1	0.2099	1
1	16091591	FBLIM1	0.0296238	0.1226	6	NA	NA	0.08523	3	0.1597	6	0.1191	1
6	135290440	HBS1L	0.0297359	0.1166	7	0.6848	6	0.005523	3	0.1144	6	0.923	5
1	163117173	RGS5	0.0297696	0.3596	1	0.9829	1	NA	NA	0.03387	1	0.01672	1
11	57886280	OR9I1	0.0297884	0.2081	4	0.4369	2	0.005011	4	0.4265	8	0.2403	4
3	179408054	USP13	0.0298338	0.7655	6	0.01054	2	0.6848	5	0.01923	9	0.4405	4
17	41139295	RUNDC1	0.0299633	0.2055	2	NA	NA	0.3153	3	0.01428	6	NA	NA
2	26804247	CIB4	0.0299917	0.5386	4	0.09077	2	0.3578	1	0.02039	4	0.1323	2
2	70082038	GMCL1	0.0300915	0.469	3	NA	NA	0.04686	1	0.04234	1	NA	NA
3	129150385	MBD4	0.0300917	0.2806	7	0.2915	6	0.1473	9	0.0584	8	0.06741	6
5	112173729	APC	0.030283	0.07662	12	0.4518	38	0.46	19	0.005246	25	0.5734	14
12	7187848	C1R	0.030335	0.002058	5	0.6328	3	0.172	6	0.3384	10	0.6336	5
5	114961392	TICAM2	0.0303388	0.001595	2	NA	NA	0.9388	4	0.1462	4	0.9397	2
5	114961392	TMED7-TICAM2	0.0303388	0.001595	2	NA	NA	0.9388	4	0.1462	4	0.9397	2
1	155911517	RXFP4	0.0303627	0.4778	4	0.3791	5	0.3892	5	0.1166	6	0.005851	4
15	75893532	SNUPN	0.0304415	0.9903	1	0.005337	4	0.169	6	0.779	10	0.0694	7
2	26415232	HADHA	0.0304758	0.00859	3	0.27	3	0.2713	4	0.191	7	0.4025	3
19	45452024	APOC2	0.0305342	NA	NA	0.1812	1	NA	NA	0.0266	3	NA	NA
5	180582043	OR2V2	0.0305407	0.01162	5	NA	NA	NA	NA	0.4149	2	NA	NA
2	233735073	C2orf82	0.0306163	NA	NA	NA	NA	0.005832	1	0.8291	2	NA	NA
6	149846300	PPIL4	0.0306166	0.4276	1	0.005535	1	NA	NA	0.4023	4	NA	NA
14	22434148	TRAV12-3	0.03081	NA	NA	0.03081	1	NA	NA	NA	NA	NA	NA
19	42791482	CIC	0.0308345	0.2743	6	0.4351	1	0.1823	2	0.002886	8	0.7845	3
9	101498824	ANKS6	0.0308853	0.1341	2	0.05606	4	0.9971	8	0.05665	16	0.1163	9
10	101379915	SLC25A28	0.03091	NA	NA	NA	NA	NA	NA	0.03091	1	NA	NA
6	87725340	HTR1E	0.0309287	0.02335	3	NA	NA	0.01094	4	0.8884	4	0.9321	4
1	159273943	FCER1A	0.0309315	NA	NA	0.3029	2	0.1125	7	0.4877	6	0.01273	5
9	106857824	SMC2	0.0309782	0.02877	8	0.5066	5	0.1197	8	0.9183	14	0.03097	8
12	58335626	XRCC6BP1	0.030987	0.1205	1	0.2588	3	0.1255	2	0.01499	5	0.8461	2
16	58052912	USB1	0.0309877	0.02664	2	0.08328	1	NA	NA	0.4361	5	NA	NA
19	17972120	RPL18A	0.0309897	NA	NA	NA	NA	0.1223	1	0.04011	1	NA	NA
11	12785856	TEAD1	0.0311762	0.03121	2	NA	NA	NA	NA	0.1583	3	NA	NA
11	82443672	FAM181B	0.0312784	0.0036	3	0.6481	1	0.1132	4	0.605	4	0.3152	3
1	55451872	TMEM61	0.0313822	0.3945	1	0.258	3	0.7448	2	0.4571	4	0.001461	3
10	11047400	CELF2	0.0314283	NA	NA	0.0176	1	0.26	2	0.09286	1	0.5095	2
12	6687692	CHD4	0.0314791	NA	NA	0.1135	1	0.5536	2	0.06224	4	0.05549	1
17	7909792	GUCY2D	0.0316223	0.6066	5	0.8938	10	0.02042	9	0.1255	12	0.03687	9
1	155240602	CLK2	0.0316242	NA	NA	0.09177	2	0.6912	3	0.3941	5	0.008739	3
11	55798145	OR5AS1	0.0317352	0.09179	5	NA	NA	0.8807	4	0.08417	10	0.03227	2
6	29394655	OR11A1	0.0318978	0.04303	6	0.07228	3	0.0433	3	0.6846	4	0.5632	3
1	166826838	TADA1	0.0319335	0.3933	1	0.008703	1	0.8832	2	0.04909	3	0.3505	1
1	111854889	CHIA	0.0320263	0.6505	7	0.6464	4	0.8412	4	0.0977	10	0.001512	8
6	26091179	HFE	0.0320878	0.05908	3	0.9855	15	0.7191	7	0.02516	7	0.04975	4
14	39646666	PNN	0.0321264	0.02324	3	0.4972	4	0.5266	2	0.5217	8	0.01654	2
8	122626383	HAS2	0.032477	0.02258	4	NA	NA	NA	NA	0.2297	1	NA	NA
3	129009622	C3orf37	0.032562	0.002703	1	0.3812	1	0.4371	2	0.1693	2	0.7032	2
15	83328439	AP3B2	0.0326059	0.5072	4	NA	NA	0.0007596	3	0.622	8	0.953	3
19	12848342	ASNA1	0.03274	NA	NA	NA	NA	NA	NA	0.03274	2	NA	NA
1	162351741	RP11-565P22.6	0.0328304	0.5876	2	NA	NA	0.06139	1	0.5083	2	0.01258	2
12	32735175	FGD4	0.0328678	0.1774	5	0.8896	4	0.0036	7	0.3042	8	0.3148	5
21	43496247	UMODL1	0.0328724	0.6114	17	0.3587	12	0.05821	12	0.1658	27	0.02571	13
2	200820862	C2orf47	0.0329485	0.001833	2	NA	NA	0.6074	1	0.943	3	NA	NA
1	118042131	MAN1A2	0.0330768	0.8979	3	0.006548	1	NA	NA	0.1795	2	NA	NA
19	15052665	OR7C2	0.033199	0.9683	2	0.003476	1	NA	NA	0.3151	5	NA	NA
12	57317649	SDR9C7	0.0332871	0.2504	6	NA	NA	0.1571	4	0.9915	11	0.006034	3
5	137451371	NME5	0.0333435	NA	NA	NA	NA	NA	NA	0.008954	4	0.5977	1
6	26157073	HIST1H1E	0.033371	0.0004234	3	0.7371	3	0.8007	3	0.3536	5	0.6305	2
12	13061535	GPRC5A	0.033395	0.622	6	0.6972	2	0.01885	4	0.009512	10	0.7173	5
3	187444617	BCL6	0.0334021	0.5541	4	0.04184	1	0.09595	1	0.9422	3	0.02662	1
20	44806628	CDH22	0.033469	0.3112	3	0.305	3	0.8442	5	0.04005	6	0.01744	3
12	674486	NINJ2	0.0334965	NA	NA	0.5865	1	0.009636	6	0.864	4	0.04864	2
3	170136972	CLDN11	0.0336555	NA	NA	0.07112	1	NA	NA	0.07609	1	NA	NA
2	99938565	TXNDC9	0.0336701	NA	NA	0.9279	2	0.2194	2	0.008624	2	0.1363	2
16	66967623	FAM96B	0.03369	0.03369	1	NA	NA	NA	NA	NA	NA	NA	NA
2	241631588	AQP12A	0.0337245	NA	NA	0.5009	1	NA	NA	0.01083	1	NA	NA
8	22460101	C8orf58	0.0338937	0.1246	1	0.08851	2	0.3002	2	0.01778	6	0.9697	2
7	141672604	TAS2R38	0.0338944	0.5443	5	NA	NA	0.7868	2	0.002546	8	NA	NA
7	143701438	OR6B1	0.0339001	0.01266	3	0.02662	3	0.4749	6	0.479	9	0.7448	8
8	99961655	OSR2	0.03391	NA	NA	0.03391	1	NA	NA	NA	NA	NA	NA
11	13393794	ARNTL	0.0339473	0.3443	4	NA	NA	NA	NA	0.01588	1	NA	NA
4	53751937	SCFD2	0.0339541	0.8384	4	0.1709	5	0.05904	5	0.1242	14	0.05448	8
1	23847529	E2F2	0.0339886	0.5007	1	0.7802	4	0.04796	4	0.008728	8	0.3506	6
19	11034582	YIPF2	0.0340271	0.01512	2	NA	NA	0.3069	2	0.2362	4	NA	NA
10	12209752	NUDT5	0.0341381	NA	NA	0.003338	2	0.9626	2	0.3426	2	NA	NA
20	31374337	DNMT3B	0.034163	0.4833	6	0.3262	3	0.9977	3	0.04862	7	0.007557	3
11	75507398	DGAT2	0.0341653	0.02802	3	0.3363	3	0.007502	4	0.9253	6	0.8836	5
7	20406754	ITGB8	0.0341782	0.5795	6	NA	NA	0.01681	2	0.9064	3	0.0277	1
1	24484108	IL28RA	0.0342006	0.4976	3	NA	NA	0.07237	2	0.2702	5	0.02516	3
7	16640454	ANKMY2	0.0342137	0.1675	3	0.6896	1	0.008802	3	0.6829	2	0.08343	5
2	171822466	GORASP2	0.0342458	0.006836	1	NA	NA	NA	NA	0.8082	2	NA	NA
12	121660756	P2RX4	0.0343045	0.5933	2	0.1706	4	0.8223	2	0.006618	3	0.1056	2
7	138732434	ZC3HAV1	0.0343046	0.06006	5	0.9804	3	0.5414	4	0.1609	8	0.01134	6
6	109752445	PPIL6	0.0343809	0.5198	1	NA	NA	0.1251	3	0.01709	4	NA	NA
13	25264516	ATP12A	0.0344028	0.6604	9	0.7303	7	0.581	7	0.001445	26	0.1443	8
9	139835558	FBXW5	0.03442	0.007911	11	0.9706	8	0.1813	10	0.09757	17	0.4305	10
15	45467437	SHF	0.0344456	0.01989	4	0.8011	4	0.7165	3	0.1673	5	0.03065	4
7	87037381	ABCB4	0.034451	0.363	4	0.4583	12	0.1758	6	0.00429	9	0.4667	7
7	102724261	ARMC10	0.0345517	0.5086	2	0.4381	3	0.02211	3	0.05281	4	0.2261	4
2	150061802	LYPD6B	0.0349043	0.9482	1	0.003157	1	0.922	1	0.05203	2	0.4162	2
14	20923826	APEX1	0.0349349	0.3018	1	0.003325	1	0.8136	4	0.1472	5	0.498	5
5	179264564	C5orf45	0.0349448	0.4492	3	0.09277	4	0.026	4	0.348	5	0.1588	3
9	91083288	SPIN1	0.035068	0.4199	1	0.3201	1	0.246	1	0.9201	1	0.001979	1
4	108552796	PAPSS1	0.0350986	0.02597	3	0.04768	3	0.2092	4	0.249	6	0.9347	3
16	2263822	PGP	0.0351059	NA	NA	0.6213	1	0.0644	2	0.09924	2	0.06405	2
10	23609745	C10orf67	0.0351104	NA	NA	0.09223	2	0.0749	1	0.05238	1	0.703	1
22	30517715	HORMAD2	0.0351675	0.7294	1	0.0466	4	0.257	4	0.06428	10	0.1077	5
8	144522278	ZC3H3	0.0353102	0.2525	10	0.6789	6	0.02602	11	0.02299	21	0.5935	10
19	44341340	ZNF283	0.0353108	NA	NA	0.3791	1	0.106	5	0.263	7	0.02427	5
5	150175109	C5orf62	0.0353189	NA	NA	0.2928	1	0.5265	1	0.003451	1	0.4823	1
19	19822871	ZNF14	0.0353194	0.04457	4	0.007347	1	0.4563	7	0.9695	4	0.4203	3
21	45557079	AP001055.7	0.035345	0.7359	3	NA	NA	NA	NA	0.007796	3	NA	NA
12	234929	IQSEC3	0.0353464	0.09322	5	0.1304	3	0.2342	3	0.09023	3	NA	NA
1	53320274	ZYG11A	0.03535	0.5595	4	0.02463	2	0.9013	6	0.4077	7	0.01204	5
10	27301848	ANKRD26	0.0353529	0.06987	10	0.6716	6	0.02199	16	0.2863	20	0.2064	14
17	8285501	RP11-849F2.7	0.0354482	NA	NA	0.2694	1	NA	NA	NA	NA	0.02137	1
17	8285501	RPL26	0.0354482	NA	NA	0.2694	1	NA	NA	NA	NA	0.02137	1
1	15495100	C1orf195	0.03554	NA	NA	0.03554	2	NA	NA	NA	NA	NA	NA
12	6752776	ACRBP	0.0356327	0.2428	6	0.1833	3	0.566	4	0.2441	11	0.01004	3
10	69692476	HERC4	0.0357109	0.2155	2	0.1858	2	0.7127	3	0.7978	4	0.002721	3
7	116140419	CAV2	0.03572	NA	NA	NA	NA	NA	NA	0.03572	2	NA	NA
8	133142000	KCNQ3	0.0357251	0.6298	3	0.1655	5	0.3777	3	0.004111	5	0.383	2
11	56468258	OR9G1	0.0357339	0.304	4	0.8019	4	0.8804	2	0.1727	6	0.001673	3
7	116770651	ST7	0.0358743	NA	NA	NA	NA	0.4506	1	0.005471	3	0.4772	2
8	91094898	CALB1	0.0359036	NA	NA	NA	NA	0.02432	1	0.3937	1	0.123	1
10	63450379	C10orf107	0.0359471	0.5901	2	0.5597	2	0.1379	1	0.006304	1	0.218	1
9	21206532	IFNA10	0.03596	NA	NA	0.03596	1	NA	NA	NA	NA	NA	NA
1	92161307	TGFBR3	0.0359657	0.6109	4	0.05063	6	0.3614	6	0.03059	9	0.1832	5
17	79060247	BAIAP2	0.0359801	0.23	3	NA	NA	NA	NA	0.02548	4	NA	NA
11	117050010	SIDT2	0.0360317	0.6661	9	0.09684	5	0.6499	7	0.001846	15	0.8118	7
1	212798251	FAM71A	0.0360949	0.01774	8	0.02573	4	0.9486	6	0.204	11	0.7132	3
18	2890649	EMILIN2	0.036135	0.04285	12	0.04346	3	0.08218	8	0.6212	12	0.6638	4
11	111597714	PPP2R1B	0.0361603	0.05627	4	0.7425	4	0.04339	3	0.1488	10	0.2342	8
4	165891141	TRIM61	0.03621	NA	NA	0.03621	1	NA	NA	NA	NA	NA	NA
4	185580557	CCDC111	0.0362439	0.7851	4	0.02956	2	0.2247	4	0.0328	7	0.3707	5
6	41889487	BYSL	0.0362654	0.04968	3	0.3407	2	0.06334	5	0.1251	8	0.4732	2
11	4608061	OR52I2	0.036275	0.6886	3	NA	NA	NA	NA	0.008594	2	NA	NA
1	241823930	WDR64	0.0362843	0.4098	8	0.1581	4	0.1061	4	0.1431	12	0.06457	8
16	22358636	CDR2	0.03636	NA	NA	NA	NA	NA	NA	0.03636	2	NA	NA
1	54238077	TMEM48	0.0364119	0.06236	4	0.9051	3	0.9346	2	0.009393	9	0.1289	3
20	825761	FAM110A	0.0364575	0.1588	2	0.8016	3	0.00474	2	0.1828	5	0.5802	5
1	53668099	CPT2	0.0364629	0.1512	7	0.05041	9	0.8504	6	0.02516	14	0.3925	5
18	77170477	NFATC1	0.0365003	0.09053	13	0.09755	8	0.01987	9	0.3952	14	0.9245	8
2	68592496	PLEK	0.0365265	0.01349	7	0.6873	1	0.8932	4	0.5649	5	0.01372	3
12	54394284	HOXC9	0.0365505	NA	NA	0.1714	2	NA	NA	0.03484	1	NA	NA
8	6372298	ANGPT2	0.0366357	0.5699	3	0.2314	2	0.3054	4	0.001836	5	0.8721	4
9	123673647	TRAF1	0.0366441	0.6487	5	0.1887	3	0.00543	3	0.4074	5	NA	NA
11	4944728	OR51G1	0.0367761	0.6168	8	0.3618	6	0.7728	8	0.0006942	9	0.5419	9
20	18470608	RBBP9	0.0367847	0.9928	4	0.05186	2	NA	NA	0.02363	1	NA	NA
20	53092546	DOK5	0.036859	0.2681	4	NA	NA	0.04691	2	0.097	6	NA	NA
8	101153024	FBXO43	0.0368898	NA	NA	0.01356	2	0.1026	4	0.5331	7	0.3687	3
1	34330067	HMGB4	0.0369381	0.03256	4	0.01774	1	0.2821	3	0.9899	7	0.405	4
2	37395103	SULT6B1	0.037064	0.4787	9	NA	NA	0.3899	1	0.5351	4	0.002757	2
19	18557617	ELL	0.0370888	0.1368	4	0.07526	3	0.8184	3	0.01739	5	0.4487	3
19	43857873	CD177	0.0371699	0.02284	1	0.5234	1	0.1036	1	0.07183	2	0.7416	2
1	17548837	PADI1	0.0372327	0.1536	11	0.9207	4	0.02086	6	0.3168	17	0.07078	7
14	23816759	SLC22A17	0.0372863	0.09984	2	NA	NA	0.1117	1	0.7991	2	0.03117	2
4	62599227	LPHN3	0.0372959	0.002462	6	0.4873	4	0.6889	8	0.6795	7	0.1181	7
7	33217156	BBS9	0.0373463	0.04882	5	0.05317	3	0.7904	7	0.08584	19	0.3774	8
5	111071138	NREP	0.0373672	0.2275	2	0.06284	2	0.05573	2	0.2261	2	0.3693	2
17	33802156	SLFN12L	0.037475	0.5693	3	0.4699	3	0.07607	2	0.01059	5	0.3101	3
3	50645283	CISH	0.037494	0.2002	5	NA	NA	0.8977	3	0.4091	5	0.003809	3
7	102462523	FBXL13	0.0375068	0.008071	10	0.03246	1	0.8231	5	0.6401	14	0.4848	7
4	73963889	ANKRD17	0.0375616	0.9535	1	0.07081	2	0.7895	3	0.313	6	0.00402	2
9	131585069	C9orf114	0.0375634	0.05047	2	0.3145	2	0.02601	2	0.4313	3	0.3767	3
19	1244170	ATP5D	0.0376817	0.289	1	NA	NA	NA	NA	0.02143	1	NA	NA
5	1225626	SLC6A18	0.0377096	0.006271	10	0.441	7	0.208	10	0.9025	17	0.13	8
3	52867434	TMEM110-MUSTN1	0.0377948	0.2326	3	0.641	3	0.2033	4	0.06312	7	0.0354	3
12	75442007	KCNC2	0.03788	NA	NA	NA	NA	NA	NA	0.03788	2	NA	NA
7	97933515	BAIAP2L1	0.0379348	0.5277	5	0.15	3	0.8515	3	0.01025	6	0.09861	2
12	1902897	CACNA2D4	0.0381181	0.03656	14	0.9154	5	0.07383	16	0.1328	28	0.2092	14
1	43616475	FAM183A	0.0381291	NA	NA	0.5604	4	0.6044	2	0.003371	3	0.2514	1
5	89769728	AC093510.2	0.038132	0.3358	1	NA	NA	0.02231	3	0.06044	4	0.634	2
5	89769728	MBLAC2	0.038132	0.3358	1	NA	NA	0.02231	3	0.06044	4	0.634	2
15	74276995	STOML1	0.0382066	NA	NA	0.7289	2	0.03885	2	0.04521	4	NA	NA
15	45249121	C15orf43	0.03822	0.03822	3	NA	NA	NA	NA	NA	NA	NA	NA
6	18161646	KDM1B	0.0382972	0.002653	6	0.3296	1	0.1554	4	0.8692	6	0.5855	2
3	154801978	MME	0.0383276	0.4386	6	0.251	3	0.01596	4	0.07423	7	0.5309	4
8	59728153	TOX	0.0384465	0.1486	5	0.3294	1	NA	NA	0.1674	7	0.03546	3
16	30775692	RNF40	0.0385752	0.3071	1	0.0571	2	0.5632	2	0.008174	3	0.8665	3
19	49224107	RASIP1	0.0385971	NA	NA	0.6247	3	0.6352	3	0.1873	7	0.003932	4
4	69337325	TMPRSS11E	0.0386312	0.1264	2	NA	NA	NA	NA	0.7291	1	0.0141	1
10	85901354	GHITM	0.03866	NA	NA	NA	NA	NA	NA	0.03866	4	NA	NA
19	3531959	FZR1	0.0387511	NA	NA	NA	NA	0.2073	1	0.7226	4	0.008711	1
22	40037051	CACNA1I	0.038904	0.2268	7	0.2983	5	0.02794	9	0.301	12	0.1246	6
10	74096378	DNAJB12	0.0390553	0.505	3	0.11	2	0.1897	4	0.04586	5	0.1476	3
19	53057722	ZNF808	0.0390877	0.1368	3	0.1073	6	0.3689	2	0.1261	5	0.1046	2
9	139089436	LHX3	0.0390972	NA	NA	0.9745	2	0.2171	1	0.006242	2	NA	NA
16	67241545	LRRC29	0.0391152	0.03203	3	0.3319	1	NA	NA	0.1243	2	NA	NA
1	150248200	C1orf54	0.03921	NA	NA	NA	NA	NA	NA	0.03921	1	NA	NA
1	39325136	RRAGC	0.03922	NA	NA	0.03922	1	NA	NA	NA	NA	NA	NA
10	27687225	PTCHD3	0.0392602	0.6699	5	0.06984	6	0.228	8	0.006866	13	0.982	4
12	131466490	GPR133	0.0393057	0.3227	16	0.8211	5	0.01282	12	0.3798	21	0.05585	10
17	45773594	TBKBP1	0.0393081	0.1825	2	0.3795	1	NA	NA	0.8693	4	0.004986	1
3	37996477	CTDSPL	0.0393377	0.6481	2	0.01662	1	0.248	2	0.1125	3	NA	NA
14	105404534	AHNAK2	0.0393484	0.02495	20	0.09076	27	0.1076	17	0.7509	28	0.3945	19
19	46119772	EML2	0.0393872	0.09295	3	0.5592	1	0.2115	2	0.1651	6	0.03983	3
10	103348155	DPCD	0.039402	0.1612	1	0.04053	1	NA	NA	NA	NA	NA	NA
13	96239805	DZIP1	0.039437	0.006592	4	0.6977	4	0.5525	5	0.9833	7	0.02899	3
7	295970	FAM20C	0.0394504	0.7815	5	NA	NA	0.2642	3	0.04299	4	0.034	4
5	840694	ZDHHC11	0.0395185	0.01238	2	0.3317	3	0.6945	3	0.04807	4	0.5301	1
5	41313840	PLCXD3	0.03957	NA	NA	NA	NA	0.03957	2	NA	NA	NA	NA
16	15802687	MYH11	0.0396186	0.5167	9	0.1602	13	0.002157	10	0.5029	16	0.8126	12
2	234959653	SPP2	0.0397281	0.7465	2	NA	NA	NA	NA	0.008839	2	NA	NA
3	149484960	ANKUB1	0.039802	0.1539	3	0.06161	3	0.3527	3	0.08855	7	0.2482	3
10	58118357	ZWINT	0.039948	0.3576	2	0.1331	2	0.06673	2	0.07331	7	0.3175	3
19	2933935	ZNF77	0.0399646	0.04783	4	0.5024	4	0.4699	7	0.03763	11	0.1741	6
9	140063557	LRRC26	0.0401683	NA	NA	0.9637	1	0.01857	2	0.1538	2	0.1126	2
11	73007624	P2RY6	0.0401835	0.1523	2	0.1098	1	0.7252	2	0.02557	4	NA	NA
14	70839847	SYNJ2BP	0.040196	NA	NA	0.4058	1	NA	NA	0.01649	3	NA	NA
1	161126779	UFC1	0.0402136	NA	NA	0.1034	2	NA	NA	0.06475	4	NA	NA
4	166910608	TLL1	0.0402564	0.008652	5	0.2583	3	0.5087	4	0.1029	5	0.6397	6
20	62190628	RP4-697K14.7	0.0403692	0.6397	40	0.3575	12	0.185	24	0.8341	41	0.00213	27
10	51555780	MSMB	0.0404009	0.01603	2	NA	NA	NA	NA	0.42	1	NA	NA
11	47611672	C1QTNF4	0.04053	NA	NA	NA	NA	NA	NA	0.04053	2	NA	NA
5	140529841	PCDHB6	0.0405477	0.3242	5	0.09913	4	0.05022	5	0.8577	10	0.05468	6
13	111268063	CARKD	0.0405902	0.1145	3	0.3881	3	0.3949	8	0.5957	6	0.007253	5
2	234749258	HJURP	0.0405973	0.5736	6	0.05788	5	0.8409	7	0.4704	13	0.005775	5
12	73015443	TRHDE	0.0407367	0.2518	2	0.001004	1	0.5844	3	0.5249	5	0.9833	4
2	37349776	EIF2AK2	0.0408779	0.5831	3	NA	NA	NA	NA	0.01171	2	NA	NA
18	9944924	VAPA	0.0410105	NA	NA	0.002608	1	0.9404	2	0.5743	2	NA	NA
14	69791444	GALNTL1	0.0410272	0.02638	4	0.1466	5	0.3427	5	0.1237	10	0.4704	6
4	119649805	SEC24D	0.0410324	0.0005365	3	0.4429	3	0.5783	6	0.8858	10	0.6337	5
6	41753915	PRICKLE4	0.041087	NA	NA	0.1089	2	0.01472	6	0.5888	7	0.3395	4
10	104163154	PSD	0.0411207	0.8538	6	0.1733	4	0.0483	7	0.05931	13	0.1826	5
17	19684401	ULK2	0.0411257	0.3212	4	0.4216	3	0.9149	7	0.0006802	8	0.9186	6
3	155198866	PLCH1	0.0411307	0.01011	9	0.1357	4	0.515	4	0.5786	9	0.1894	10
16	78148935	WWOX	0.0411476	0.03625	13	0.1605	6	0.1421	10	0.2028	19	0.4621	8
17	62558921	SMURF2	0.0411929	0.5815	4	0.2301	2	NA	NA	0.01059	3	NA	NA
4	122062981	TNIP3	0.0412812	0.1712	5	0.07736	3	NA	NA	0.1073	2	NA	NA
16	49430390	C16orf78	0.0413831	0.01366	2	0.7284	3	NA	NA	0.1433	4	NA	NA
22	35779124	HMOX1	0.0414063	0.2802	5	0.001393	2	0.908	3	0.9663	8	0.2285	4
17	38948714	KRT28	0.0414354	0.008836	5	0.6582	3	0.1704	3	0.3274	8	NA	NA
10	32308786	KIF5B	0.0414788	0.2548	4	0.2318	1	0.2411	3	0.01082	4	0.5093	1
1	43870071	SZT2	0.0414825	0.5946	25	0.1553	13	0.009217	18	0.2947	29	0.3129	16
10	13152400	OPTN	0.0415644	0.2367	2	0.003893	15	0.8482	2	0.8759	4	0.115	4
17	42739800	C17orf104	0.0416054	0.4427	4	0.01794	2	0.07148	1	0.5525	3	0.2514	3
19	51379895	KLK2	0.0416076	0.9368	3	0.2043	1	0.4314	3	0.3482	6	0.002743	3
12	19282743	PLEKHA5	0.041762	0.003863	5	0.49	6	0.2775	5	0.5775	8	0.2615	4
1	160917792	ITLN2	0.0417658	0.02497	4	0.5611	5	0.1238	7	0.1222	8	0.3743	6
17	76157044	C17orf99	0.0417976	0.848	3	0.0773	1	0.9118	2	0.002529	2	0.5255	2
2	96789747	ASTL	0.0418046	0.288	5	0.006793	2	0.7043	4	0.1128	4	0.5112	3
20	62339942	ZGPAT	0.0418147	0.1598	5	0.8834	4	0.02316	3	0.3878	9	0.06269	5
10	119043554	PDZD8	0.0418737	0.2425	3	0.4592	6	0.8963	6	0.0015	10	0.5321	6
22	42908936	RRP7A	0.0418862	0.3962	4	0.008015	2	NA	NA	0.4564	1	NA	NA
12	122150860	TMEM120B	0.0420021	0.02478	1	0.119	1	0.4222	2	NA	NA	0.2659	1
17	3324574	OR3A3	0.0420835	0.02419	1	0.2923	1	NA	NA	NA	NA	NA	NA
9	84605717	FAM75D1	0.0421513	0.7473	4	0.3172	9	0.4759	4	0.02305	8	0.03096	3
5	102894730	NUDT12	0.0421961	0.04703	3	0.2248	2	0.7404	4	0.1281	6	0.08042	3
14	23236524	OXA1L	0.0422198	0.6526	6	0.03912	4	0.04959	3	0.5865	6	0.1087	6
19	4891239	ARRDC5	0.0422204	0.02696	5	0.8721	3	0.2396	4	0.1993	6	0.07189	4
11	836085	CD151	0.0423532	0.5832	1	0.01339	3	0.1884	2	NA	NA	NA	NA
16	681414	WFIKKN1	0.042488	0.008173	6	NA	NA	0.4028	3	0.3934	4	0.26	3
8	143782044	LY6K	0.0425209	NA	NA	0.3603	2	NA	NA	0.01987	5	NA	NA
9	100367044	TSTD2	0.0425382	0.7234	3	0.08231	6	0.01722	6	0.1659	9	0.4802	5
9	140005147	DPP7	0.0425508	0.4034	6	0.2212	9	0.2382	10	0.01424	9	0.27	5
14	90429749	TDP1	0.0426163	0.08987	7	0.5552	1	0.1585	3	0.1466	11	0.07066	4
20	62293272	RTEL1	0.0427472	0.5444	20	0.01369	5	0.06869	12	0.2466	20	0.6521	9
1	100620728	LRRC39	0.042825	NA	NA	0.0046	1	0.5215	4	0.1743	9	0.8148	4
19	18391285	JUND	0.04285	NA	NA	NA	NA	NA	NA	0.04285	1	NA	NA
11	6953610	ZNF215	0.0428588	0.3124	7	0.1873	7	0.09773	10	0.7038	17	0.02054	5
19	36360666	APLP1	0.0429331	0.1264	3	0.4722	1	0.9588	3	0.003741	4	0.3872	3
3	98001777	OR5H2	0.042968	0.4242	2	0.01579	2	0.989	5	0.07467	6	0.1678	3
12	6604331	NCAPD2	0.0430547	0.01715	12	0.7921	8	0.0169	8	0.758	18	0.4785	12
1	41499706	SCMH1	0.0430959	0.103	8	0.4972	4	0.6914	5	0.008976	6	0.2624	4
17	7760054	LSMD1	0.0431013	0.07837	1	0.4356	1	0.8877	1	0.01135	3	NA	NA
19	56934489	ZNF583	0.0431638	0.2376	1	NA	NA	NA	NA	0.03068	2	NA	NA
12	300332	SLC6A12	0.0432138	0.518	1	0.006577	2	0.1573	3	0.2105	6	0.7425	4
1	19644218	PQLC2	0.0432356	0.1674	2	NA	NA	0.08231	1	0.1098	2	NA	NA
17	48460399	LRRC59	0.0432586	0.8791	4	NA	NA	NA	NA	0.008314	5	NA	NA
17	80788899	ZNF750	0.0434026	0.1502	9	0.3536	2	0.09717	6	0.2108	9	0.07753	3
12	68690747	MDM1	0.0435135	0.02768	5	0.3034	3	0.04469	5	0.4202	14	0.537	5
14	50092393	DNAAF2	0.0436347	0.1026	7	0.1421	2	0.2464	6	0.05808	8	0.4077	4
11	56113516	OR8K1	0.0437374	0.1275	2	0.9964	1	0.3297	3	0.003921	2	0.5199	3
11	65618262	SNX32	0.0437676	0.6051	5	NA	NA	NA	NA	0.01225	2	NA	NA
6	130152520	TMEM244	0.0438863	0.006738	3	0.4443	2	0.5459	4	0.3598	6	0.146	4
3	138340370	FAIM	0.04394	0.04394	3	NA	NA	NA	NA	NA	NA	NA	NA
17	34391721	CCL18	0.0439512	NA	NA	NA	NA	0.003006	2	0.9523	1	0.5404	1
17	79478236	ACTG1	0.0440055	NA	NA	NA	NA	0.1886	1	0.03956	1	NA	NA
3	42735150	HHATL	0.0440155	0.1698	8	0.4521	5	0.07251	11	0.6591	12	0.02351	10
4	102117083	PPP3CA	0.0440628	NA	NA	0.07847	1	NA	NA	0.09523	3	NA	NA
7	36320799	EEPD1	0.0441733	0.6614	4	0.1689	4	0.2731	5	0.5909	10	0.004812	9
9	139840422	C8G	0.0442199	0.1134	5	0.7981	4	0.01684	4	0.1119	7	0.5095	6
13	45589616	KIAA1704	0.0443168	0.1419	2	0.03814	4	0.6224	3	0.08838	6	0.2929	5
7	80378255	SEMA3C	0.0443191	0.7663	5	0.02022	5	0.07462	5	0.7607	8	0.09915	3
14	102815042	CINP	0.0444288	0.1859	2	NA	NA	NA	NA	0.0406	5	NA	NA
8	22398155	PPP3CC	0.0444355	NA	NA	0.6607	1	0.2314	2	0.01027	6	NA	NA
3	122287775	DTX3L	0.0444588	0.0004918	5	0.6891	3	0.4475	5	0.6912	9	0.8361	3
13	111367876	ING1	0.0445243	0.00321	2	0.3808	5	0.4655	6	0.6223	6	0.2481	5
1	247978306	OR14A16	0.0445298	0.4459	2	0.5597	1	0.9614	2	0.5479	6	0.0006684	3
1	200943861	KIF21B	0.0445659	0.564	5	0.04571	3	0.4694	7	0.2169	10	0.03352	4
2	184016281	NUP35	0.044585	0.007281	2	NA	NA	0.06242	1	0.9914	3	0.8027	2
7	141724872	MGAM	0.0446411	0.01839	5	0.09415	15	0.1258	14	0.8714	26	0.4648	8
9	140349707	NELF	0.0446699	NA	NA	0.5461	1	0.09011	3	0.4659	3	0.01582	2
7	107399213	CBLL1	0.0446941	NA	NA	NA	NA	0.6028	1	0.2032	1	0.01292	1
12	32133908	KIAA1551	0.0447102	0.357	27	0.3601	4	0.634	19	0.591	35	0.001836	17
1	109322026	STXBP3	0.0447202	0.6787	2	NA	NA	NA	NA	0.364	3	0.006411	1
19	2278936	C19orf35	0.0447389	0.8232	1	0.1378	2	NA	NA	0.01397	2	NA	NA
4	187196994	F11	0.0447625	0.1223	2	0.04943	13	0.1136	2	0.2288	8	0.5639	5
1	1361530	TMEM88B	0.04493	0.1536	2	0.207	1	0.8041	1	0.01023	1	0.3408	1
19	18876258	CRTC1	0.0450099	0.243	1	0.03155	1	NA	NA	NA	NA	NA	NA
19	5208046	PTPRS	0.0450129	0.09059	11	0.1937	9	0.8139	6	0.3369	12	0.01858	6
10	115348751	NRAP	0.0450613	0.1751	26	0.6259	8	0.1095	21	0.1571	35	0.0475	17
8	11637211	NEIL2	0.0450772	0.4482	5	0.008548	2	0.06305	5	0.5328	8	0.6962	3
12	6058257	VWF	0.0451228	0.2514	29	0.7842	30	0.07547	18	0.02455	30	0.2457	17
2	192922499	TMEFF2	0.0451609	NA	NA	NA	NA	0.09573	2	0.08041	2	NA	NA
12	6933705	GPR162	0.0453646	0.1126	7	0.02937	2	0.3266	7	0.3436	10	NA	NA
16	1821166	NME3	0.0453668	0.03714	2	0.2084	1	NA	NA	NA	NA	NA	NA
16	29830928	CTD-2574D22.6	0.04539	0.04539	2	NA	NA	NA	NA	NA	NA	NA	NA
19	37618045	ZNF420	0.0454359	0.03367	4	NA	NA	NA	NA	0.2303	2	NA	NA
3	50655190	MAPKAPK3	0.0454499	NA	NA	0.3013	1	0.1795	1	0.1607	1	0.04282	1
16	30004603	HIRIP3	0.0454542	0.9466	4	0.0894	3	0.1243	4	0.009886	6	0.8732	3
2	219319666	USP37	0.0455382	0.161	7	0.01044	3	0.4844	5	0.6854	10	0.1632	7
1	38453330	SF3A3	0.04555	NA	NA	NA	NA	NA	NA	0.04555	1	NA	NA
3	192980772	HRASLS	0.0456538	0.1923	5	0.5301	2	0.7904	2	0.7898	5	0.001437	3
1	162351741	C1orf226	0.045673	0.9317	3	NA	NA	0.06139	1	0.521	1	0.01258	2
20	35826857	RPN2	0.0456988	0.9271	7	NA	NA	0.8734	2	0.04251	4	0.0109	3
3	97664725	MINA	0.0457893	0.1088	7	0.2295	2	0.01032	5	0.7622	9	0.4678	5
19	57022973	ZNF471	0.0458542	0.2481	4	0.01483	3	0.8547	4	0.05793	5	0.5055	5
2	27549562	GTF3C2	0.0459572	0.004565	2	0.5805	1	0.114	2	0.8302	5	0.3685	3
19	36530421	THAP8	0.0460219	0.1441	1	NA	NA	0.6547	5	0.3742	5	0.01074	4
4	106604350	INTS12	0.046063	0.1269	3	0.238	4	0.02085	1	0.6226	2	0.2366	1
15	102191919	TM2D3	0.0460958	0.6983	4	0.04697	2	0.01694	2	0.2597	6	0.6436	2
9	130884723	PTGES2	0.0461416	0.178	5	0.03558	1	0.4942	1	0.04406	3	0.6745	1
1	6293674	ICMT	0.04624	0.2175	2	0.003934	1	0.5762	2	0.4205	2	0.4502	3
17	6703404	TEKT1	0.0462813	0.009058	9	0.2016	5	0.1503	4	0.4103	12	0.83	6
10	43596033	RET	0.0464059	0.09994	5	0.08962	54	0.7412	8	0.03855	9	0.3668	6
17	2995463	OR1D2	0.046475	0.008703	3	0.05518	1	NA	NA	0.9819	4	0.8159	2
11	17408496	KCNJ11	0.046484	0.2673	2	0.4796	20	0.01678	2	0.1789	3	NA	NA
15	79165374	MORF4L1	0.0466433	0.2992	2	0.7267	1	0.2998	3	0.005934	1	NA	NA
4	39512067	UGDH	0.0467129	0.08918	2	0.1921	3	0.9088	4	0.0249	5	NA	NA
3	146233866	PLSCR1	0.0467429	0.7205	3	0.4272	1	0.4525	1	0.9928	3	0.0006868	2
9	138457640	PAEP	0.0467652	0.1625	1	NA	NA	0.6989	1	0.004587	1	0.7454	1
16	24931497	ARHGAP17	0.0469179	0.1324	5	0.4723	2	0.1161	4	0.01388	10	0.9481	4
1	94639577	ARHGAP29	0.0469457	0.07349	4	0.6342	3	0.05012	7	0.05904	9	0.6934	5
2	39499448	MAP4K3	0.0469939	0.2607	5	0.516	6	0.02963	9	0.02818	10	0.8528	7
11	55904382	OR8J3	0.0470347	0.5805	4	NA	NA	0.2726	2	0.003273	4	0.7562	2
17	30195122	UTP6	0.0470442	0.008758	6	0.2676	4	0.8904	3	0.05255	6	0.875	5
19	36387149	NFKBID	0.04706	0.04706	1	NA	NA	NA	NA	NA	NA	NA	NA
4	7776469	AFAP1	0.0470736	0.02124	4	0.7181	4	0.4995	8	0.1011	13	0.1247	2
10	123503355	ATE1	0.0470856	NA	NA	NA	NA	0.3677	3	0.0124	6	0.3726	4
2	230632309	TRIP12	0.0471055	0.01206	5	0.2627	8	0.176	5	0.1839	4	0.9377	5
7	154738409	PAXIP1	0.0471292	0.9245	2	0.3438	2	0.00331	3	0.3514	5	0.2603	4
11	5246908	HBB	0.0471692	NA	NA	0.07224	6	NA	NA	0.1123	3	NA	NA
15	91475018	HDDC3	0.0471921	NA	NA	0.08927	2	NA	NA	0.09093	1	NA	NA
14	24805463	RIPK3	0.0472129	0.1126	6	0.384	2	0.1371	1	0.4536	3	0.03589	3
4	4242132	TMEM128	0.0473259	NA	NA	0.004283	1	0.5973	3	0.6687	3	NA	NA
21	35742799	KCNE2	0.0473773	NA	NA	0.01721	7	NA	NA	0.4739	2	NA	NA
1	93426938	FAM69A	0.04743	NA	NA	0.04743	1	NA	NA	NA	NA	NA	NA
15	43678512	TUBGCP4	0.0474372	0.3734	1	0.4002	2	0.1103	5	0.2902	7	0.02033	4
13	78130042	SCEL	0.0474384	0.006434	3	0.3303	1	0.8913	5	0.1199	10	0.4282	4
8	21847855	XPO7	0.04744	0.04744	2	NA	NA	NA	NA	NA	NA	NA	NA
22	19118992	TSSK2	0.0474979	0.9827	5	0.256	3	NA	NA	0.07466	6	0.02116	2
9	130473533	C9orf117	0.0475689	0.2587	3	0.4717	3	0.3013	4	0.04474	11	0.05938	7
11	8414229	STK33	0.0478746	0.5345	4	0.01049	1	0.4479	5	0.3109	8	0.1264	4
12	54686186	NFE2	0.0479295	NA	NA	NA	NA	0.9643	1	0.008577	2	NA	NA
6	34003582	GRM4	0.0479379	0.0207	2	NA	NA	0.05119	4	0.4445	5	0.8555	5
17	74003318	EVPL	0.0481014	0.8959	19	0.01787	10	0.04488	18	0.2773	30	0.4991	10
7	116199267	CAV1	0.048156	0.5154	1	0.1345	2	NA	NA	0.02527	2	NA	NA
10	99218456	MMS19	0.0481938	0.1126	9	0.1336	9	0.9505	7	0.0924	14	0.0755	7
11	64665374	ATG2A	0.0482425	0.05514	14	0.02666	6	0.4478	16	0.1736	21	0.8743	10
22	31522450	INPP5J	0.0483269	0.4646	3	0.7833	2	0.07432	4	0.6339	8	0.005844	4
14	102675723	WDR20	0.0483952	0.8745	2	0.1018	1	0.2796	3	0.3225	6	0.01251	5
7	27934904	JAZF1	0.0484262	0.1094	1	0.4418	1	0.06804	1	0.1244	1	NA	NA
6	30039034	RNF39	0.0486112	0.2319	2	0.4028	3	0.03641	1	0.6821	2	0.0436	1
1	27190149	SFN	0.0486984	NA	NA	0.07319	2	NA	NA	0.1152	2	NA	NA
20	5155925	CDS2	0.0487208	0.06078	2	0.03529	1	NA	NA	0.8298	1	NA	NA
6	28227273	NKAPL	0.0488014	0.09131	6	0.07084	3	0.1434	5	0.1536	8	0.7144	4
2	170356065	BBS5	0.048809	0.8924	3	0.05152	3	0.2329	2	0.02729	4	0.3484	4
2	170356065	RP11-724O16.1	0.048809	0.8924	3	0.05152	3	0.2329	2	0.02729	4	0.3484	4
2	219206292	PNKD	0.0489162	0.4063	2	0.8744	4	0.03712	3	0.1912	9	0.04052	5
6	46832812	GPR116	0.0490833	0.1255	8	0.4761	6	0.01537	11	0.325	18	0.3442	9
20	3672122	SIGLEC1	0.049112	0.6862	19	0.1445	10	0.2281	16	0.9019	29	0.005041	12
7	32598626	AVL9	0.049223	0.2753	3	0.05809	1	0.1781	3	0.05491	7	0.6599	2
16	30364805	CD2BP2	0.0493775	0.2441	3	NA	NA	0.02871	2	0.1504	2	0.3996	3
8	117950524	AARD	0.0494748	NA	NA	NA	NA	0.1486	3	0.2834	2	0.04316	1
11	5221008	OR51V1	0.0495248	0.3255	4	0.1436	3	0.07514	7	0.9607	10	0.03089	7
7	123256427	ASB15	0.0495281	0.1579	6	0.6769	2	0.6235	5	0.1683	10	0.009294	3
9	131107439	SLC27A4	0.0495461	0.003759	5	0.4054	3	NA	NA	0.3707	7	0.7494	2
7	36561695	AOAH	0.0496518	0.862	8	0.3809	5	0.001738	8	0.2942	11	0.6234	7
5	16177949	2021-03-11	0.0499082	NA	NA	0.5651	1	NA	NA	0.01537	1	NA	NA
4	123814164	NUDT6	0.0499367	NA	NA	0.3489	1	0.2988	2	0.008326	4	0.4935	1
19	45206789	CEACAM16	0.0500434	0.7101	3	0.4385	3	0.03307	3	0.02585	4	0.3982	1
19	41198056	ADCK4	0.0501957	0.03475	4	0.7088	2	NA	NA	0.07506	6	0.2335	3
1	92428316	BRDT	0.050209	0.3812	6	0.9708	5	0.002481	4	0.242	7	0.4796	3
12	92537956	BTG1	0.05028	NA	NA	NA	NA	NA	NA	0.05028	1	NA	NA
5	37816042	GDNF	0.0503324	0.4964	3	0.5244	3	0.1051	4	0.03374	5	0.1159	2
17	79514028	C17orf70	0.0503751	0.04479	6	0.03955	6	0.491	11	0.1738	15	0.7087	10
14	24806525	RP11-934B9.3	0.0504802	0.4558	1	0.1521	1	0.1371	1	0.6214	2	0.0182	1
6	26240711	HIST1H4F	0.0505042	NA	NA	0.1003	1	NA	NA	0.08785	1	NA	NA
11	57177579	SLC43A3	0.0505533	0.2387	1	NA	NA	NA	NA	0.01206	5	0.6503	1
11	113078035	NCAM1	0.0505552	0.2815	10	0.5645	5	0.4157	9	0.05834	18	0.02796	11
7	141137475	TMEM178B	0.05063	NA	NA	NA	NA	NA	NA	0.05063	1	NA	NA
18	23612484	SS18	0.05068	NA	NA	NA	NA	NA	NA	0.05068	2	NA	NA
12	48240458	VDR	0.0507019	0.6301	3	0.8525	4	0.02367	5	0.07555	6	0.1127	4
1	40525111	CAP1	0.0507157	NA	NA	0.1914	3	NA	NA	0.04627	1	NA	NA
1	213303178	RPS6KC1	0.0507388	0.6719	5	0.1673	4	0.06144	8	0.7926	17	0.0198	8
4	7062894	GRPEL1	0.0507917	0.1046	4	NA	NA	NA	NA	0.08482	3	NA	NA
4	84216580	HPSE	0.0508234	0.5175	4	0.6991	2	0.3852	6	0.009797	9	0.0796	6
6	146214448	SHPRH	0.0508268	0.7827	6	0.168	7	0.08446	16	0.09642	22	0.1015	15
1	167779027	ADCY10	0.0509013	0.02804	13	0.2084	7	0.998	10	0.02404	20	0.7771	11
11	63233686	HRASLS5	0.0509381	0.1304	5	0.2967	3	0.1686	3	0.03688	8	0.4534	4
9	90497948	FAM75E1	0.0510105	0.2173	14	0.05917	7	0.729	17	0.1086	17	0.1074	13
21	31691792	KRTAP26-1	0.0511919	0.05424	2	0.2394	1	0.7096	1	0.06489	3	0.1839	2
19	55998262	NAT14	0.05123	0.05123	1	NA	NA	NA	NA	NA	NA	NA	NA
19	5693616	LONP1	0.0513855	0.1517	7	0.6239	5	0.1136	10	0.02077	18	0.4954	12
8	41504105	NKX6-3	0.0514139	0.4734	2	NA	NA	NA	NA	0.01902	2	NA	NA
17	39871696	GAST	0.0514188	NA	NA	NA	NA	0.09544	2	0.0231	2	0.8691	2
15	64980951	OAZ2	0.0514295	NA	NA	0.01019	1	0.1276	1	0.3872	1	0.8893	1
20	3739299	C20orf27	0.0514463	0.0395	1	0.3672	1	NA	NA	0.1322	1	NA	NA
22	25750778	LRP5L	0.0517789	0.1285	5	0.1044	5	0.2763	5	0.774	10	0.03904	5
19	55587822	EPS8L1	0.0518774	0.07048	5	0.05979	3	0.5527	4	0.09747	6	0.4949	3
19	1555740	MEX3D	0.05206	NA	NA	0.05206	2	NA	NA	NA	NA	NA	NA
15	85643398	PDE8A	0.0520635	0.2682	5	0.262	2	0.0915	2	0.07093	5	NA	NA
19	49079224	SULT2B1	0.0520934	0.3439	7	0.3055	4	0.3267	6	0.3215	7	0.01025	3
10	14563932	FAM107B	0.0521572	0.3178	1	0.02883	2	NA	NA	NA	NA	NA	NA
1	180971756	STX6	0.0522153	0.02328	1	NA	NA	0.2324	2	0.3617	5	NA	NA
1	43021868	CCDC30	0.0522325	0.9399	3	0.236	2	0.5247	3	0.001008	7	0.9683	4
12	15134372	PDE6H	0.0523825	0.1805	1	0.7995	2	0.01362	2	NA	NA	NA	NA
16	67765383	RANBP10	0.0524781	NA	NA	NA	NA	0.008687	2	0.2287	3	0.9918	3
5	139189189	PSD2	0.0525249	0.2248	6	0.3398	2	0.7175	6	0.003965	12	0.5275	5
1	114437707	AP4B1	0.0525352	0.1152	6	0.1493	3	0.3947	4	0.8082	7	0.0209	6
17	27889643	ABHD15	0.0526047	NA	NA	0.04823	3	0.2379	1	NA	NA	0.1723	2
21	47333949	PCBP3	0.05267	0.05267	1	NA	NA	NA	NA	NA	NA	NA	NA
11	63585359	C11orf84	0.0527068	0.05894	1	NA	NA	NA	NA	0.081	2	0.4152	2
1	152079989	TCHH	0.0527141	0.4833	7	0.02207	10	0.6087	11	0.118	16	0.1505	11
1	155039849	EFNA4	0.0527722	0.1262	2	0.03402	1	0.4453	5	0.07742	5	0.7804	2
12	53497402	SOAT2	0.0529769	0.86	4	0.002497	7	0.6168	5	0.8217	11	0.1068	5
17	80393652	HEXDC	0.0529881	NA	NA	0.175	5	0.7419	6	0.061	14	0.05913	7
10	128150096	C10orf90	0.0529928	0.02011	4	0.3607	4	0.1958	8	0.8532	14	0.09597	8
3	52130666	POC1A	0.0530176	0.1194	7	0.1563	2	0.8565	4	0.02459	8	0.2961	4
20	17930836	SNX5	0.0530299	NA	NA	0.1336	3	0.5726	2	0.02613	4	NA	NA
9	3225104	RFX3	0.0530345	NA	NA	0.4282	3	0.0383	2	0.2901	3	0.09856	1
2	9611524	CPSF3	0.0530656	0.8337	1	NA	NA	0.05244	2	0.5656	4	0.01898	3
1	48231630	TRABD2B	0.0531481	NA	NA	0.9862	2	NA	NA	0.009505	1	NA	NA
14	36133936	RALGAPA1	0.0531604	0.2435	2	0.6024	5	0.03718	4	0.03595	4	0.5962	3
7	1024855	CYP2W1	0.0533145	NA	NA	0.4392	3	0.004807	4	0.2268	7	0.9871	4
14	21424241	RNASE2	0.0533438	0.04533	2	0.6495	4	0.04586	1	0.1006	2	0.8654	2
10	127408432	C10orf137	0.0533625	0.7254	5	0.307	1	NA	NA	0.004547	5	0.4674	3
19	42213944	CEACAM5	0.0535015	0.05913	4	0.5324	4	0.4166	2	0.03623	5	NA	NA
17	79405446	BAHCC1	0.0535292	0.2479	12	0.9428	7	0.03013	16	0.1367	22	0.1228	13
3	127981001	EEFSEC	0.0536461	0.06504	4	0.8521	5	0.006411	5	0.5822	8	0.5735	5
17	15496727	CDRT1	0.05376	NA	NA	0.05376	3	NA	NA	NA	NA	NA	NA
5	138283099	SIL1	0.0537721	0.9841	4	0.00137	1	0.4337	1	0.7993	6	0.2548	2
19	1278847	AC004258.1	0.05387	0.05387	3	NA	NA	NA	NA	NA	NA	NA	NA
7	99688952	COPS6	0.0538988	NA	NA	0.8879	1	0.002303	1	0.7597	1	0.3093	1
2	42578409	COX7A2L	0.0539056	0.4281	2	NA	NA	NA	NA	0.5308	4	0.008997	2
4	128554293	INTU	0.0539073	0.347	9	0.01024	4	0.9597	6	0.4618	10	0.07593	4
19	13915703	ZSWIM4	0.0539872	0.005857	5	0.4819	3	0.1661	4	0.2789	10	0.9167	4
14	94512255	OTUB2	0.0540412	0.9722	1	0.007466	2	NA	NA	0.3612	5	0.184	3
1	54694148	SSBP3	0.0541002	0.2405	2	NA	NA	0.7881	1	0.01084	3	NA	NA
8	42821648	HOOK3	0.0542082	0.01014	3	0.7418	1	NA	NA	0.2739	4	NA	NA
1	43239274	C1orf50	0.0543026	NA	NA	0.4805	1	0.7065	3	0.3926	7	0.003646	3
2	166737197	TTC21B	0.0543038	0.9055	9	0.001903	11	0.4796	9	0.3823	16	0.383	9
12	109719214	FOXN4	0.0543173	0.6506	5	0.0203	4	0.06863	3	0.4131	3	0.3233	4
1	111663161	DRAM2	0.0544167	NA	NA	0.03996	1	NA	NA	0.2414	5	NA	NA
9	127215772	GPR144	0.0544516	0.6351	9	0.009801	8	0.06373	10	0.4615	17	0.6639	13
14	24798433	ADCY4	0.0545997	0.197	4	0.2786	6	0.03296	9	0.1803	15	0.3743	8
1	16069071	TMEM82	0.0547896	0.5256	7	0.2371	4	0.6819	9	0.7852	10	0.00184	8
8	118552171	MED30	0.0548179	0.08004	1	NA	NA	NA	NA	0.1216	2	NA	NA
15	55483191	RSL24D1	0.05484	0.05484	2	NA	NA	NA	NA	NA	NA	NA	NA
10	75574840	CAMK2G	0.0549505	NA	NA	NA	NA	0.7345	1	0.01329	1	NA	NA
10	135438901	FRG2B	0.055	NA	NA	0.055	4	NA	NA	NA	NA	NA	NA
7	25175862	C7orf31	0.0550514	0.8674	6	0.001351	3	0.6067	5	0.3233	13	0.5383	3
9	140449959	WDR85	0.0552132	0.8002	7	0.006865	1	0.5886	3	0.5247	5	0.07328	2
19	58965147	ZNF324B	0.0552238	0.4199	3	0.09292	1	NA	NA	0.05417	2	NA	NA
21	38126664	HLCS	0.0552895	0.9491	7	0.05895	8	0.03405	8	0.1042	16	0.6277	8
3	25635127	RARB	0.0553758	NA	NA	NA	NA	0.2847	1	0.03461	1	NA	NA
10	60548136	BICC1	0.055441	0.2107	4	0.078	4	0.03815	8	0.9907	13	0.2015	6
4	38799444	TLR1	0.0554644	0.08052	6	0.141	5	0.2686	6	0.6966	13	0.05896	9
5	98128948	RGMB	0.0555339	NA	NA	0.1725	1	NA	NA	0.05732	2	NA	NA
17	33679518	SLFN11	0.055641	0.02228	8	0.02797	2	0.8789	2	0.4954	6	0.464	4
19	51563265	KLK13	0.0556903	0.2907	1	0.03413	2	NA	NA	NA	NA	NA	NA
2	178481818	TTC30A	0.0557068	NA	NA	0.2798	3	NA	NA	0.07444	1	0.1027	2
2	242501852	BOK	0.0557236	0.1576	2	0.0938	2	0.447	3	0.02737	4	0.6978	3
19	51837487	VSIG10L	0.0557582	0.6517	4	0.01019	2	0.3052	4	0.2047	4	0.3045	4
19	58867597	ZNF497	0.0558162	0.1687	2	NA	NA	0.8424	3	0.5231	4	0.006814	1
1	246730090	CNST	0.0558168	NA	NA	0.006772	2	0.2196	3	0.3474	9	0.9805	3
16	58713798	SLC38A7	0.0558238	0.02127	2	0.4739	5	0.3527	2	0.04244	2	0.8389	3
8	124238771	C8orf76	0.0558593	0.1165	2	NA	NA	0.01062	3	0.4211	4	0.9734	1
8	124238771	ZHX1-C8ORF76	0.0558593	0.1165	2	NA	NA	0.01062	3	0.4211	4	0.9734	1
8	120079618	COLEC10	0.0559432	0.159	6	0.2825	5	0.03284	3	0.2091	5	0.4118	3
1	162535958	UAP1	0.0559614	0.3791	4	0.4664	2	0.008422	3	0.7961	5	0.1072	2
17	7077122	ASGR1	0.05614	NA	NA	NA	NA	NA	NA	0.05614	3	NA	NA
4	84465731	AGPAT9	0.0561951	0.5854	2	0.0392	6	0.02631	3	0.9633	7	0.22	6
3	10328453	GHRL	0.0562514	0.07535	4	0.3835	2	0.6038	1	0.06432	2	0.1142	2
15	85382307	ALPK3	0.0563598	0.8822	19	0.003325	4	0.4489	12	0.6715	17	0.1454	8
12	33532804	SYT10	0.0563874	0.6102	6	NA	NA	0.008817	1	0.4043	4	NA	NA
6	83074734	TPBG	0.0564691	NA	NA	0.04051	3	0.05431	2	0.2421	2	0.9679	3
3	101293089	PCNP	0.05648	NA	NA	NA	NA	NA	NA	0.05648	1	NA	NA
14	79175765	NRXN3	0.0565122	0.2156	6	0.2374	2	0.2847	6	0.3981	12	0.02226	4
10	126631562	ZRANB1	0.0565628	NA	NA	0.02345	1	0.5293	3	0.176	3	NA	NA
19	57174993	ZNF835	0.0566947	NA	NA	0.6977	4	0.5122	1	0.3614	1	0.004016	1
14	74318714	PTGR2	0.0567585	NA	NA	0.3583	1	0.3805	3	0.0161	4	NA	NA
21	31914013	KRTAP19-6	0.05677	NA	NA	NA	NA	NA	NA	0.05677	2	NA	NA
2	27351363	ABHD1	0.0568664	0.05971	3	0.175	3	0.3626	7	0.06079	12	0.5664	7
14	39716201	MIA2	0.0569101	0.4465	5	0.2987	2	0.5305	6	0.008187	13	0.2255	5
12	44238723	TMEM117	0.0569308	NA	NA	0.3935	3	0.3987	2	0.01285	7	0.2589	4
1	155920126	ARHGEF2	0.05701	NA	NA	NA	NA	NA	NA	0.05701	7	NA	NA
16	69364857	COG8	0.0572308	0.003078	7	0.8642	2	0.6604	5	0.2995	6	NA	NA
17	46239844	SKAP1	0.0573897	0.8282	2	NA	NA	NA	NA	0.06909	3	0.03895	2
17	76187108	AFMID	0.0574003	0.001839	3	0.7651	2	0.3426	5	0.9971	10	0.2756	6
3	2613232	CNTN4	0.0575439	0.5297	4	0.2825	4	0.1643	7	0.03529	12	0.1533	6
5	1409836	SLC6A3	0.0575752	0.3232	8	0.6156	5	0.03576	8	0.07216	9	0.2593	9
4	41615579	LIMCH1	0.0577428	0.1509	11	0.5511	3	0.01007	11	0.2468	19	0.6472	12
16	10837913	NUBP1	0.0577526	0.1749	1	NA	NA	NA	NA	0.02762	3	0.4654	3
18	43565399	PSTPIP2	0.0578378	NA	NA	0.4131	3	NA	NA	0.02515	2	NA	NA
6	74079024	OOEP	0.057888	NA	NA	0.2396	2	0.1267	2	0.1429	4	0.1234	3
6	36936606	MTCH1	0.0579	NA	NA	0.0579	2	NA	NA	NA	NA	NA	NA
1	32713033	FAM167B	0.0579044	NA	NA	0.00202	1	0.9536	1	0.601	1	0.4626	1
16	88705398	IL17C	0.0580185	0.103	2	0.332	1	0.3417	3	0.04597	4	NA	NA
19	54695642	TSEN34	0.0580458	0.2186	3	0.8299	2	0.00614	2	0.5993	4	0.2021	2
3	50616353	HEMK1	0.058071	0.08825	3	0.02579	1	0.5159	3	0.4581	6	NA	NA
5	94814011	TTC37	0.058179	0.008021	15	0.737	2	0.1597	7	0.5413	16	0.265	5
18	45566276	ZBTB7C	0.0582209	0.02435	1	0.128	6	0.6956	5	0.1618	7	0.3865	4
17	46655230	HOXB4	0.0583251	NA	NA	0.4475	1	0.6186	2	0.012	3	0.163	1
9	135273601	TTF1	0.0584126	0.9022	13	NA	NA	0.3364	4	0.005857	16	0.3053	12
12	65122781	GNS	0.05853	0.05853	1	NA	NA	NA	NA	NA	NA	NA	NA
2	203653587	ICA1L	0.0586442	NA	NA	0.8366	2	0.05522	5	0.2962	6	0.0399	5
14	24610441	EMC9	0.058672	0.009465	1	0.6304	2	0.1087	2	0.8424	3	NA	NA
16	51171034	SALL1	0.0587047	0.5326	6	0.01774	4	0.1438	4	0.3365	3	0.3006	4
7	127222544	GCC1	0.0587956	0.2441	3	0.6992	3	0.01216	5	0.1503	12	0.4417	7
1	222919895	FAM177B	0.05882	NA	NA	NA	NA	NA	NA	0.05882	2	NA	NA
1	223900410	CAPN2	0.0588586	0.03047	11	0.5226	3	0.2501	10	0.03539	9	0.9793	8
6	31592275	PRRC2A	0.058867	0.07253	25	0.9945	11	0.2766	16	0.1192	17	0.05805	14
16	31765105	ZNF720	0.05896	NA	NA	NA	NA	NA	NA	0.05896	1	NA	NA
12	3724583	EFCAB4B	0.0590189	0.3996	10	0.2646	2	0.05697	3	0.03472	8	0.6629	2
1	213032371	FLVCR1	0.0590189	0.9178	2	0.6139	5	0.1084	4	0.003042	5	0.7462	3
2	73989915	DUSP11	0.0590621	0.1728	2	NA	NA	NA	NA	0.06168	2	NA	NA
17	9489233	WDR16	0.0590791	0.4279	5	0.6919	3	0.0005764	6	0.8255	5	0.9858	5
1	18807536	KLHDC7A	0.0591465	0.05624	3	NA	NA	0.08722	4	0.4737	9	NA	NA
2	175311383	GPR155	0.0591621	0.149	6	NA	NA	NA	NA	0.07168	3	NA	NA
6	55142337	HCRTR2	0.0592323	0.001264	1	0.1913	1	0.9582	3	0.6595	3	0.9127	2
17	2290850	MNT	0.0593423	0.0694	1	NA	NA	0.1629	2	0.09288	3	0.5294	1
19	3762750	MRPL54	0.0594025	0.04118	1	NA	NA	0.4799	1	0.1691	1	0.1666	1
20	62576034	UCKL1	0.0594061	0.5217	4	0.008264	2	0.08004	5	0.7015	5	0.5789	1
11	7324426	SYT9	0.0594521	0.01866	3	0.02908	2	0.4208	3	0.8976	2	0.6846	2
1	149919225	OTUD7B	0.0594802	NA	NA	0.08545	4	0.03467	5	0.2275	6	0.8277	3
1	23756417	ASAP3	0.0595444	0.5144	8	0.1271	6	0.8811	11	0.03735	17	0.06538	11
4	47427873	GABRB1	0.059553	NA	NA	NA	NA	0.8333	1	0.7457	1	0.003775	2
3	128621444	ACAD9	0.0596002	0.003311	5	0.7925	4	0.1794	5	0.7104	6	0.4213	5
4	68780399	TMPRSS11A	0.0596408	0.007554	10	0.1587	3	0.783	6	0.4877	8	0.3081	6
3	48573700	PFKFB4	0.059748	0.03157	2	NA	NA	NA	NA	0.3424	1	NA	NA
12	133586836	ZNF26	0.0598205	NA	NA	0.01946	1	NA	NA	0.5563	1	NA	NA
1	218458753	RRP15	0.0598574	0.4761	5	0.07743	1	0.5401	3	0.008909	6	0.7999	3
8	22995702	TNFRSF10D	0.0599471	0.3052	6	0.003199	3	0.3072	3	0.6369	14	0.7446	12
14	57740964	AP5M1	0.05998	0.01425	5	0.117	2	0.7113	2	0.9979	7	0.1203	2
1	248525402	OR2T4	0.0601927	0.3955	2	0.02758	1	NA	NA	NA	NA	NA	NA
7	24843998	OSBPL3	0.0602631	0.9735	4	0.0129	3	0.06902	6	0.8118	12	0.2039	7
19	47646845	SAE1	0.0603764	0.6434	5	0.01427	2	NA	NA	0.2604	2	NA	NA
1	158224516	CD1A	0.0605021	0.3752	3	0.01253	5	0.1487	4	0.2727	9	0.7575	6
5	176951707	FAM193B	0.0607121	0.2483	3	0.5722	1	0.01936	6	0.9849	5	0.05361	5
3	72799481	SHQ1	0.0609133	0.3248	4	0.2627	4	0.01487	1	0.7787	6	0.1478	5
11	48510904	OR4A47	0.0609736	0.6042	2	0.01834	1	NA	NA	NA	NA	NA	NA
17	4337267	SPNS3	0.0610793	0.8636	3	0.3663	5	0.7923	15	0.5429	20	0.001078	12
2	108489225	RGPD4	0.06108	NA	NA	0.06108	1	NA	NA	NA	NA	NA	NA
5	140792894	PCDHGA10	0.0611519	0.271	6	0.2625	4	0.9795	6	0.1254	8	0.01682	4
5	140021612	TMCO6	0.0611547	0.01199	1	NA	NA	NA	NA	0.3088	7	0.6573	3
3	53908348	ACTR8	0.0611638	NA	NA	0.5839	1	NA	NA	0.01905	3	NA	NA
3	186337713	AHSG	0.0612855	0.2443	3	0.8118	2	NA	NA	0.005035	4	0.5847	2
16	15690753	KIAA0430	0.0615521	0.2759	8	0.09171	12	0.1213	8	0.6849	12	0.07067	6
6	35253974	ZNF76	0.0615718	0.0162	7	0.3109	5	0.3317	11	0.2265	15	0.3928	7
16	48395527	SIAH1	0.06162	NA	NA	0.06162	2	NA	NA	NA	NA	NA	NA
11	66311412	ZDHHC24	0.0616551	0.02875	2	NA	NA	NA	NA	0.3907	1	NA	NA
12	8800767	MFAP5	0.0617027	NA	NA	NA	NA	NA	NA	0.9385	2	0.01198	2
17	27011891	SUPT6H	0.0617077	0.7923	4	0.3823	3	0.07222	5	0.02668	8	0.2556	4
2	136872987	CXCR4	0.06171	NA	NA	NA	NA	NA	NA	0.06171	2	NA	NA
11	2426256	TRPM5	0.0617836	0.03058	13	0.435	8	0.8076	11	0.2314	24	0.06013	8
9	107528634	NIPSNAP3B	0.0618702	0.5193	1	0.3378	2	0.2358	5	0.0264	10	0.1372	5
4	85414579	NKX6-1	0.06189	NA	NA	NA	NA	NA	NA	0.06189	2	NA	NA
12	12814818	GPR19	0.0618974	0.004476	4	0.3548	1	NA	NA	0.5353	2	0.6973	2
14	21161784	ANG	0.0620145	NA	NA	0.6378	7	0.03552	2	0.02771	3	0.947	1
3	130799419	NEK11	0.0620206	0.04734	7	0.2149	2	0.0184	6	0.957	7	0.8397	4
11	36614215	RAG2	0.0620312	0.001006	2	0.853	4	0.9186	3	0.3685	10	0.518	5
11	5528918	UBQLN3	0.0620369	0.01686	12	0.09446	7	0.7324	8	0.2817	14	0.458	5
16	70597871	SF3B3	0.0621429	0.221	1	0.6113	1	0.04362	4	0.07541	4	0.3396	1
2	97526521	SEMA4C	0.0622001	0.08751	3	0.7288	5	0.0182	5	0.2148	8	0.6062	3
6	31746806	VARS	0.0622123	0.6285	12	0.5527	5	0.5328	7	0.525	11	0.001556	8
3	15614707	HACL1	0.0622925	0.1112	5	0.7984	4	0.02139	5	0.2634	10	0.3029	3
9	115932012	FKBP15	0.062334	0.1558	7	0.7058	5	0.009	2	0.1942	10	0.7892	1
22	50925884	MIOX	0.0623457	0.6514	8	0.3218	4	0.06334	4	0.0467	5	0.2447	3
17	39680191	KRT19	0.0625215	0.6486	1	0.0488	4	0.4284	3	0.09207	3	0.1221	2
9	125562532	OR1K1	0.0625831	0.03109	3	0.8904	4	0.1266	3	0.8303	6	0.05247	1
19	39306529	ECH1	0.0626049	0.05064	1	NA	NA	NA	NA	NA	NA	0.226	2
2	176948116	EVX2	0.062637	0.5512	2	0.03574	2	0.2428	3	0.1262	3	NA	NA
14	104029346	APOPT1	0.06266	NA	NA	NA	NA	NA	NA	0.06266	2	NA	NA
14	74345884	RP5-1021I20.4	0.0626747	NA	NA	0.3583	1	0.3805	3	0.01847	3	NA	NA
16	30036680	FAM57B	0.06279	0.06279	1	NA	NA	NA	NA	NA	NA	NA	NA
2	238243292	COL6A3	0.0628176	0.01403	41	0.3234	22	0.3001	37	0.1359	65	0.8302	32
12	6787612	ZNF384	0.0628244	NA	NA	NA	NA	0.5006	1	0.02296	2	NA	NA
1	153994647	NUP210L	0.0628437	0.0501	5	0.337	5	0.7143	11	0.03293	12	0.3871	11
1	26581700	CEP85	0.063077	0.426	3	0.1029	3	0.02136	6	0.6653	8	0.2483	4
3	155615783	GMPS	0.0631812	0.7932	1	NA	NA	0.1823	1	0.01761	2	NA	NA
3	49200627	CCDC71	0.063189	NA	NA	NA	NA	0.6007	3	0.01927	5	NA	NA
18	31538235	NOL4	0.06319	NA	NA	0.06319	1	NA	NA	NA	NA	NA	NA
2	166872146	SCN1A	0.0632076	0.02595	5	0.3937	7	0.7433	7	0.1328	15	0.1539	6
22	24106448	C22orf15	0.0632325	0.3004	2	0.003767	4	0.9824	2	0.5509	4	NA	NA
3	100494075	ABI3BP	0.0632498	0.02271	5	0.7287	5	0.01565	7	0.7534	13	0.7963	7
6	153078248	VIP	0.06328	0.06328	1	NA	NA	NA	NA	NA	NA	NA	NA
15	45545478	SLC28A2	0.0633155	0.1399	8	0.2969	8	0.03797	8	0.2858	14	0.3453	8
7	44621720	TMED4	0.0633788	NA	NA	0.4925	1	NA	NA	0.02359	1	NA	NA
15	76696901	SCAPER	0.0634365	0.7748	3	0.3364	6	0.8209	11	0.02835	18	0.02574	10
2	242255830	2021-09-02	0.0636255	NA	NA	0.1791	2	0.07848	2	0.7788	2	0.05648	2
22	22599216	VPREB1	0.0636284	0.4832	2	NA	NA	NA	NA	0.02416	2	NA	NA
15	39544380	C15orf54	0.0637694	NA	NA	NA	NA	0.1645	3	0.07116	4	NA	NA
5	162890919	HMMR	0.0637811	0.04469	11	0.5385	3	0.05573	4	0.1518	9	0.7738	2
15	29346121	APBA2	0.063796	0.1997	6	0.01569	6	0.2523	5	0.7853	10	NA	NA
2	10186320	KLF11	0.063804	0.3507	7	0.02986	1	0.1667	7	0.5726	8	0.1577	6
6	168910644	SMOC2	0.063852	0.346	4	0.168	2	0.4729	5	0.1718	8	0.03342	1
3	184290727	EPHB3	0.0638735	0.3165	5	0.5356	2	0.02814	5	0.08648	9	0.3828	4
6	105526501	LIN28B	0.0640748	NA	NA	NA	NA	0.02927	1	0.1158	2	0.7661	1
1	247751717	OR2G2	0.0640777	0.8794	5	NA	NA	NA	NA	0.01339	4	NA	NA
19	7809071	CD209	0.0642494	0.3657	3	0.01454	2	NA	NA	0.4902	2	NA	NA
7	56174102	CHCHD2	0.0642526	0.449	1	NA	NA	0.2758	2	0.02105	2	NA	NA
22	40417608	FAM83F	0.0642647	0.8903	3	0.8579	1	0.5309	6	0.005913	11	0.06653	4
2	58390589	FANCL	0.0642754	0.2853	4	0.1437	1	0.9058	3	0.01691	5	NA	NA
8	30469811	GTF2E2	0.0642774	NA	NA	0.04788	3	0.499	4	0.1819	4	0.1445	2
11	5372751	OR51B6	0.0642941	0.6404	1	0.02603	2	0.6929	4	0.6046	7	0.02286	4
1	20978996	DDOST	0.0643138	0.2411	4	0.1647	6	0.04271	4	0.144	10	0.654	5
6	134491422	SGK1	0.0643286	0.3436	7	NA	NA	0.8977	3	0.949	4	0.002148	2
6	170102748	C6orf120	0.0644101	NA	NA	0.0194	2	0.6009	1	0.1016	4	0.5319	2
12	125811215	TMEM132B	0.0644412	0.6988	4	0.405	3	0.73	4	0.125	8	0.006205	5
1	114377568	PTPN22	0.0647142	0.1901	6	0.5455	3	0.03145	6	0.09497	12	0.521	7
7	121965550	CADPS2	0.064715	0.01654	2	0.1719	4	0.5382	7	0.1305	9	0.8081	3
10	70044031	PBLD	0.0647301	0.6713	2	0.05399	2	NA	NA	0.03782	4	0.4631	1
2	36583725	CRIM1	0.0648619	0.542	5	0.04814	7	0.4448	5	0.03114	9	0.4482	4
6	39311521	KIF6	0.0649244	0.4261	12	0.4478	6	0.485	7	0.007837	12	0.2237	3
1	55014013	ACOT11	0.0650421	0.5245	7	0.6542	5	0.03759	6	0.9493	6	0.01329	6
2	25194771	DNAJC27	0.065044	0.01851	1	0.3138	1	NA	NA	0.4565	1	NA	NA
13	77641789	MYCBP2	0.0650598	0.1213	13	0.8711	6	0.009362	9	0.2492	22	0.6604	13
19	52000151	SIGLEC12	0.0651151	0.013	6	0.08967	3	0.8873	4	0.4245	6	0.3713	3
22	50502489	MLC1	0.0656268	0.6416	3	0.08298	2	0.9822	1	0.02795	9	0.113	5
21	37572667	DOPEY2	0.0657369	0.4268	22	0.2368	11	0.2126	23	0.02715	40	0.2839	25
1	16390023	FAM131C	0.0657392	0.1855	1	0.4994	2	NA	NA	0.02905	1	NA	NA
16	11979087	GSPT1	0.0657678	0.01384	1	NA	NA	NA	NA	0.8784	1	NA	NA
13	78320753	SLAIN1	0.0658297	0.2505	2	0.04678	2	0.4096	4	0.2581	6	0.134	4
4	40337919	CHRNA9	0.0658649	0.01572	4	0.9723	4	0.2246	6	0.3538	9	0.1368	5
16	85711861	GINS2	0.06593	NA	NA	NA	NA	NA	NA	0.06593	2	NA	NA
16	2024070	TBL3	0.0659616	0.189	9	0.004394	4	0.4651	12	0.8745	13	0.4931	12
8	104709424	RIMS2	0.0659736	0.1241	4	0.3035	6	0.014	9	0.4056	14	0.779	10
1	153507176	S100A6	0.0659745	NA	NA	NA	NA	0.8615	3	0.3287	5	0.009551	1
8	8176221	PRAGMIN	0.0661213	0.02431	8	0.4054	6	0.838	8	0.02698	23	0.7505	8
16	68026486	DPEP2	0.0661794	0.6361	1	0.02493	2	0.1221	4	0.1734	8	0.4988	3
5	148388420	SH3TC2	0.0662301	0.3152	10	0.3719	10	0.6235	18	0.006925	27	0.3313	9
10	129676611	CLRN3	0.0663705	0.9425	5	0.09585	3	0.3201	3	0.7201	6	0.008081	2
5	146658874	STK32A	0.0663841	NA	NA	NA	NA	NA	NA	0.9022	3	0.01363	1
11	63357583	PLA2G16	0.0664085	0.0195	2	NA	NA	NA	NA	0.6309	2	NA	NA
20	3096055	UBOX5	0.0665249	0.04246	3	0.4887	3	0.01865	2	0.6364	2	0.6859	3
20	39831295	ZHX3	0.0665688	0.3304	4	0.5257	5	0.4401	3	0.007484	9	0.2956	3
1	67220450	TCTEX1D1	0.06658	NA	NA	NA	NA	NA	NA	0.06658	1	NA	NA
11	60636633	ZP1	0.0666127	0.9971	9	0.008463	2	0.3747	5	0.3037	10	0.1763	5
12	122326793	RP11-87C12.2	0.0666509	0.7795	2	0.0005425	1	0.438	2	0.9539	2	0.9591	3
1	40980559	DEM1	0.0667799	0.974	2	0.00671	3	NA	NA	0.4209	3	NA	NA
1	33065947	ZBTB8OS	0.0668271	NA	NA	0.1951	2	0.06524	2	0.903	4	0.058	2
22	17444640	GAB4	0.0669776	0.6774	3	0.008484	3	0.208	7	0.2856	15	0.5004	4
17	910442	ABR	0.0671772	0.144	4	NA	NA	NA	NA	0.08665	5	NA	NA
11	65365830	MAP3K11	0.0672496	NA	NA	0.02209	2	0.4947	1	0.2542	4	NA	NA
6	32782112	HLA-DOB	0.0672982	0.8173	2	0.19	3	0.4335	4	0.06549	5	0.03906	3
21	38437951	PIGP	0.0673014	NA	NA	NA	NA	0.3732	2	0.03885	4	0.1918	2
7	48278916	ABCA13	0.0673398	0.7479	39	0.08003	40	0.5781	60	0.2476	86	0.02012	45
6	44081630	MRPL14	0.06735	0.06735	1	NA	NA	NA	NA	NA	NA	NA	NA
19	51480840	KLK7	0.0677085	0.2392	3	NA	NA	0.01175	1	0.9978	6	NA	NA
9	129870871	ANGPTL2	0.0677255	0.3343	2	0.423	2	0.005199	2	0.3691	4	0.6413	3
1	36752433	THRAP3	0.0677376	NA	NA	0.1349	1	0.1732	2	0.1201	7	NA	NA
6	4116262	ECI2	0.0678245	0.9917	4	0.2849	2	0.1025	4	0.02355	5	NA	NA
2	234178662	ATG16L1	0.067899	0.1919	2	NA	NA	0.2243	1	0.06541	2	NA	NA
12	121221518	SPPL3	0.0679463	NA	NA	0.3042	1	0.01375	1	0.7914	1	0.2066	1
17	42018835	PPY	0.0679594	NA	NA	NA	NA	0.2658	1	0.02091	1	0.5072	2
16	81010073	CMC2	0.06796	0.06796	2	NA	NA	NA	NA	NA	NA	NA	NA
6	29523670	UBD	0.0679965	0.4845	2	NA	NA	NA	NA	0.02614	1	NA	NA
1	93965129	FNBP1L	0.0681859	NA	NA	0.004965	2	0.8588	2	0.6642	2	NA	NA
5	1268697	TERT	0.0683388	0.5445	2	0.9817	21	0.4298	2	0.001376	2	0.5588	2
4	25664381	SLC34A2	0.0683795	0.6828	6	0.2619	4	0.985	7	0.102	9	0.009842	8
1	158517471	OR6Y1	0.0683848	0.2425	2	0.3107	5	0.332	11	0.9012	15	0.007845	11
16	333284	PDIA2	0.0685691	0.4249	22	0.8333	12	0.2191	14	0.07356	20	0.03113	11
20	34241281	RBM12	0.0685914	0.5439	4	0.6784	1	0.007932	2	0.1044	6	0.5817	5
1	3786245	DFFB	0.0686677	0.3162	3	0.2217	2	0.3445	1	0.0168	5	0.4389	2
1	120295173	HMGCS2	0.0689124	0.8364	5	0.0973	4	0.05465	4	0.4195	7	0.09601	4
12	133291473	PGAM5	0.06895	NA	NA	NA	NA	NA	NA	0.06895	2	NA	NA
4	76785641	PPEF2	0.0690321	0.1719	12	0.04028	7	0.07207	9	0.3937	16	0.9144	8
18	13001512	CEP192	0.0691582	0.2566	8	0.003913	11	0.632	17	0.3599	29	0.789	18
15	67500933	AAGAB	0.0691611	0.0468	2	0.9001	4	0.5482	2	0.2523	7	0.03093	4
17	56435167	RNF43	0.0692011	0.587	7	0.1839	2	0.9977	7	0.002377	12	0.7046	9
12	111158933	PPP1CC	0.06923	0.06923	1	NA	NA	NA	NA	NA	NA	NA	NA
16	1411798	GNPTG	0.0692754	0.2392	9	0.292	4	NA	NA	0.2529	3	0.03989	1
11	9007342	NRIP3	0.0693174	NA	NA	0.5951	3	0.07457	3	0.04093	6	0.3883	4
11	120198093	TMEM136	0.0693792	NA	NA	0.3957	2	0.04261	2	0.1721	3	NA	NA
17	1648294	SERPINF2	0.0694425	NA	NA	0.5336	2	0.1652	4	0.03296	6	NA	NA
6	105563677	BVES	0.0694496	NA	NA	0.4039	1	0.04112	5	0.5624	6	0.07573	2
17	7245325	ACAP1	0.0694518	0.2532	5	NA	NA	0.06889	3	0.1666	4	NA	NA
8	63936659	GGH	0.06949	0.06949	3	NA	NA	NA	NA	NA	NA	NA	NA
17	34247202	RDM1	0.0695	NA	NA	NA	NA	NA	NA	0.0695	3	NA	NA
13	101707799	NALCN	0.0695459	0.7076	4	0.2263	6	0.7082	4	0.07862	6	0.0204	4
10	71874784	AIFM2	0.0695603	0.4406	4	0.6252	3	0.6295	7	0.07907	9	0.01327	6
8	21964944	NUDT18	0.0695766	0.1987	4	0.08249	4	0.0369	7	0.4953	7	0.6076	3
22	37462190	TMPRSS6	0.0696811	0.5321	8	0.7845	8	0.6098	6	0.02205	12	0.03251	4
7	106685640	PRKAR2B	0.06976	NA	NA	0.06976	1	NA	NA	NA	NA	NA	NA
13	113030772	SPACA7	0.0697968	0.4823	2	0.1868	2	NA	NA	0.03248	6	NA	NA
6	26273234	HIST1H2BI	0.0698747	0.01321	2	NA	NA	NA	NA	0.9914	1	NA	NA
15	66845422	LCTL	0.0699056	0.05398	7	0.272	5	0.5816	11	0.9138	14	0.02351	9
21	36081038	CLIC6	0.069922	0.4158	2	0.008354	3	0.618	4	0.1228	6	0.6962	3
12	66546100	TMBIM4	0.0699508	NA	NA	0.8658	2	0.8093	4	0.9365	5	0.00109	3
1	115141989	DENND2C	0.0699574	0.07687	10	0.2192	9	0.2228	8	0.06823	14	0.7171	8
16	58314433	PRSS54	0.0702281	0.06163	4	0.08936	2	0.6287	2	0.5061	3	0.1055	1
12	104376693	TDG	0.0702673	0.2225	1	0.1398	1	0.537	1	0.04312	3	NA	NA
3	167750504	GOLIM4	0.0702962	0.9762	3	0.05057	1	0.8074	2	0.4883	6	0.009514	3
7	100806341	VGF	0.0703266	NA	NA	NA	NA	0.07688	1	0.05465	3	0.7039	3
17	42030502	PYY	0.07034	0.07034	1	NA	NA	NA	NA	NA	NA	NA	NA
5	140682543	SLC25A2	0.0704047	0.5748	4	NA	NA	NA	NA	0.673	6	0.007657	1
17	47075135	IGF2BP1	0.0704516	NA	NA	NA	NA	NA	NA	0.4404	3	0.03004	1
11	4510258	OR52K1	0.070527	0.006873	2	NA	NA	NA	NA	0.6745	1	0.6405	2
1	15870989	DNAJC16	0.0705619	0.205	3	0.3263	2	NA	NA	0.04442	3	NA	NA
17	73987590	TEN1	0.07067	NA	NA	0.07067	1	NA	NA	NA	NA	NA	NA
17	56598991	2021-09-04	0.0706815	0.2873	2	0.0477	2	0.184	7	0.1178	8	0.6291	6
11	62559301	TMEM223	0.0707073	0.2558	3	0.9083	3	0.243	3	0.007306	2	0.4533	3
4	96761317	PDHA2	0.0707297	0.195	4	0.6954	2	0.556	3	0.5915	10	0.004195	7
7	100054475	C7orf61	0.0708073	NA	NA	NA	NA	NA	NA	0.2491	4	0.05344	2
9	124065224	GSN	0.0708205	0.4163	8	0.7987	7	0.3266	7	0.003414	15	0.5057	8
1	95699802	RWDD3	0.0709654	0.3837	1	NA	NA	0.0163	2	0.4789	2	NA	NA
6	69666684	BAI3	0.0709716	0.05988	3	0.1472	3	0.4626	4	0.3555	5	0.1298	4
2	25467083	DNMT3A	0.0710083	NA	NA	0.02421	2	0.2958	2	0.4186	5	NA	NA
2	45169352	SIX3	0.0710386	NA	NA	0.03361	2	0.7181	2	0.03532	2	0.8593	2
8	6913014	DEFA5	0.07112	NA	NA	0.07112	2	NA	NA	NA	NA	NA	NA
19	9267302	ZNF317	0.0711386	0.2677	6	0.372	3	0.4154	4	0.0126	6	0.3624	3
11	67376023	NDUFV1	0.0712961	0.4133	2	0.3868	4	NA	NA	0.7089	3	0.0065	1
8	10383138	PRSS55	0.0713943	0.1353	6	0.03379	3	0.8711	7	0.2906	11	0.1642	5
1	206665837	C1orf147	0.07153	NA	NA	0.07153	2	NA	NA	NA	NA	NA	NA
8	142446018	AC100803.1	0.0716386	0.3086	12	0.4663	9	0.1358	13	0.01846	25	0.5298	14
16	30078860	ALDOA	0.0717255	0.1689	3	NA	NA	0.1281	2	0.2833	3	0.1213	2
10	124166131	PLEKHA1	0.0717464	0.486	4	0.4242	1	0.02241	2	0.05823	5	0.7122	2
4	54327696	LNX1	0.0717919	0.4182	13	0.8269	6	0.003993	7	0.3208	13	0.433	9
1	32635611	KPNA6	0.071868	0.04106	1	0.3302	1	NA	NA	NA	NA	NA	NA
16	75238103	CTRB2	0.0720276	0.1413	1	NA	NA	0.6927	2	0.0124	2	0.6166	2
9	34521567	ENHO	0.07208	0.07208	1	NA	NA	NA	NA	NA	NA	NA	NA
3	31725213	OSBPL10	0.0721359	0.2815	5	0.02366	3	0.04691	3	0.9422	5	0.6568	2
3	167183414	SERPINI2	0.0722175	NA	NA	0.7943	1	0.3385	2	0.1251	3	0.02234	3
2	54342846	ACYP2	0.0722309	NA	NA	0.03874	1	0.5978	1	0.6574	3	0.04937	2
11	64950393	CAPN1	0.0722762	0.3462	5	0.1317	8	0.4411	8	0.07971	13	0.121	8
3	49947766	MON1A	0.0723328	0.8087	2	0.01142	1	0.7512	3	0.9292	4	0.03013	1
7	100172813	LRCH4	0.0723412	0.7175	9	0.3176	4	0.009221	3	0.3134	9	0.295	7
10	114169276	ACSL5	0.0723854	0.1328	3	0.8925	1	0.07188	3	0.1154	6	0.1978	3
17	4873773	CAMTA2	0.0724124	0.5622	4	0.0649	5	0.03969	5	0.9808	11	0.137	3
7	42004062	GLI3	0.0724311	0.4057	9	0.7135	8	0.6238	11	0.09152	11	0.01178	9
16	66761618	DYNC1LI2	0.0724541	0.08567	3	NA	NA	0.2727	1	0.132	1	NA	NA
11	5152957	OR52A5	0.072471	0.01156	6	0.08871	4	0.6514	6	0.7905	10	0.369	2
1	41473203	CTPS1	0.0726157	0.02023	2	0.6788	1	NA	NA	NA	NA	NA	NA
5	125801239	GRAMD3	0.0726408	NA	NA	0.2648	4	0.301	2	0.7941	7	0.01198	5
22	50706277	MAPK11	0.07265	0.07265	1	NA	NA	NA	NA	NA	NA	NA	NA
4	119947922	SYNPO2	0.0726684	0.8667	11	0.001872	3	0.6903	10	0.2287	17	0.7642	12
13	50279776	KPNA3	0.072773	0.3079	2	NA	NA	NA	NA	0.01294	1	0.7788	1
1	47717238	STIL	0.0728508	0.08162	7	0.6526	4	0.5371	8	0.1858	15	0.03698	8
8	30694351	TEX15	0.0729137	0.1375	23	0.06859	12	0.07211	18	0.5124	39	0.5649	17
14	64375888	SYNE2	0.073041	0.1182	58	0.5965	33	0.7435	58	0.02906	101	0.1296	52
6	130465825	SAMD3	0.0730757	0.4584	5	0.1916	2	0.4715	5	0.02332	11	0.2046	5
3	50355730	HYAL2	0.07316	NA	NA	NA	NA	0.07316	1	NA	NA	NA	NA
1	113252882	PPM1J	0.0731643	0.4168	9	0.1253	4	0.3119	4	0.03993	5	0.3044	5
2	86346119	PTCD3	0.0731934	0.8583	5	0.2741	6	0.2763	7	0.2994	11	0.01018	5
11	68821507	TPCN2	0.0732372	0.06587	4	0.1694	8	0.1483	9	0.1716	15	0.6984	11
17	48447918	MRPL27	0.0733138	0.9196	1	NA	NA	NA	NA	0.01511	2	NA	NA
9	14619085	ZDHHC21	0.0733499	0.02054	1	0.3091	1	0.6935	2	0.1536	3	0.294	1
15	75632184	COMMD4	0.0734046	0.1873	1	NA	NA	NA	NA	0.0743	2	NA	NA
22	31328563	MORC2	0.0734696	0.2839	3	0.05454	1	NA	NA	0.2031	7	NA	NA
11	57479507	MED19	0.0734832	NA	NA	0.02317	1	0.8117	3	0.9009	4	0.04556	2
8	144391624	TOP1MT	0.0735014	0.968	17	0.04663	9	0.2204	13	0.216	20	0.09285	14
7	142124170	TRBV6-8	0.07358	NA	NA	0.07358	1	NA	NA	NA	NA	NA	NA
7	99110213	ZKSCAN5	0.0736066	0.01415	5	NA	NA	0.517	3	0.8868	7	0.1193	4
19	18679379	KXD1	0.0736418	0.0617	1	NA	NA	0.5329	1	0.09596	3	NA	NA
15	78757624	IREB2	0.0736968	0.2823	6	0.3245	7	0.1217	3	0.1871	7	0.09608	4
17	73826167	UNC13D	0.0737551	0.234	16	0.0999	12	0.7513	9	0.1429	19	0.07996	10
12	120106129	PRKAB1	0.0737887	NA	NA	0.08702	2	0.5661	3	0.02679	5	0.5887	1
3	42906116	CCBP2	0.0737968	0.9996	5	0.9975	4	0.01831	4	0.1036	8	0.1062	3
5	145317685	SH3RF2	0.073896	0.08027	8	0.7822	7	0.7174	11	0.01277	15	0.35	6
12	50821551	LARP4	0.0739646	0.2313	1	NA	NA	NA	NA	0.1375	5	0.09982	3
5	68550456	CDK7	0.07399	NA	NA	NA	NA	NA	NA	0.07399	2	NA	NA
1	32936780	RP1-27O5.3	0.0741518	0.02769	2	NA	NA	NA	NA	0.5089	2	NA	NA
1	32936780	ZBTB8B	0.0741518	0.02769	2	NA	NA	NA	NA	0.5089	2	NA	NA
3	148583153	CPA3	0.0741608	0.21	10	0.2059	7	0.3704	9	0.1464	10	0.08638	7
8	85774550	RALYL	0.0742092	0.4505	2	0.07828	1	0.05683	2	0.3911	2	NA	NA
1	120459251	NOTCH2	0.0742127	0.001566	12	0.5694	9	0.5723	15	0.7917	21	0.5019	12
19	16612105	C19orf44	0.0742487	0.9491	6	0.6121	5	0.05713	6	0.4264	8	0.01434	6
7	87138695	ABCB1	0.07427	0.0249	6	0.7244	8	0.06264	7	0.5519	13	0.3256	7
11	48346728	OR4C3	0.0742882	0.1505	3	0.3354	2	NA	NA	0.06328	4	NA	NA
1	26774050	DHDDS	0.0743	NA	NA	NA	NA	NA	NA	0.0743	2	NA	NA
9	131718657	NUP188	0.0743158	0.5406	11	0.0249	7	0.04601	14	0.6722	21	0.4882	10
12	32260338	BICD1	0.0743227	0.7402	3	0.05444	2	NA	NA	0.07932	3	NA	NA
8	49832715	SNAI2	0.07441	0.07441	1	NA	NA	NA	NA	NA	NA	NA	NA
19	282274	PPAP2C	0.0744487	0.526	3	0.922	3	0.421	7	0.02446	10	0.04082	4
14	23511502	PSMB11	0.0744714	0.03606	10	0.3169	2	0.257	8	0.1189	9	0.5841	7
11	104899901	CASP1	0.0744825	0.009137	3	0.6717	5	0.3476	7	0.2493	8	0.3836	4
16	88876158	APRT	0.0744854	NA	NA	0.3637	3	NA	NA	0.03896	2	NA	NA
3	194407731	FAM43A	0.0745099	0.5154	1	NA	NA	0.5715	1	0.01089	2	NA	NA
15	41679685	NDUFAF1	0.074616	0.002123	3	0.7974	1	0.4482	3	0.4841	7	0.5571	2
8	95738586	DPY19L4	0.0748652	0.3263	7	0.217	4	0.7934	5	0.01866	9	0.1963	7
22	39441434	APOBEC3F	0.07489	0.4077	3	0.1516	4	0.921	1	0.4167	4	0.00868	2
16	727298	RHBDL1	0.0749542	0.04135	1	0.377	1	0.5041	4	0.5539	6	0.04737	4
5	140784254	PCDHGA9	0.074955	0.1864	5	0.1858	4	0.1933	10	0.3581	15	0.08601	4
21	39492432	DSCR4	0.0749958	0.001174	2	0.9513	1	0.72	3	0.4442	3	0.5778	1
14	94956045	SERPINA12	0.0750062	0.1204	9	0.2948	4	0.2118	6	0.1523	14	0.1803	5
16	3023024	PKMYT1	0.0750502	0.9342	2	NA	NA	NA	NA	0.01531	6	NA	NA
2	189599497	DIRC1	0.0750751	0.706	1	0.09549	2	0.01624	3	0.3413	3	0.5533	2
3	100000669	TBC1D23	0.0751951	0.5011	1	0.2695	7	0.279	4	0.3748	10	0.01468	5
13	38211339	TRPC4	0.0752095	0.0337	5	0.8694	1	0.03338	1	0.8183	2	NA	NA
14	93649549	MOAP1	0.0752324	0.3339	7	0.5434	4	0.4837	4	0.004686	5	0.5045	6
19	621126	POLRMT	0.075251	0.9014	7	0.01049	4	0.05958	4	0.6034	5	0.6106	5
14	73711394	PAPLN	0.0752552	0.2882	13	0.05295	14	0.902	16	0.02743	31	0.5498	14
2	137814709	THSD7B	0.0752722	0.2228	12	0.09687	8	0.07585	13	0.501	17	0.2532	12
10	24508620	KIAA1217	0.0753032	0.8425	14	0.116	12	0.6219	18	0.06788	29	0.05037	13
3	58494664	ACOX2	0.0753517	0.2954	9	0.03516	3	0.3332	7	0.151	13	0.3981	3
2	191114381	HIBCH	0.07538	NA	NA	NA	NA	NA	NA	0.07538	2	NA	NA
7	22194211	RAPGEF5	0.0753848	0.008357	2	0.4111	2	0.6421	4	0.3641	5	NA	NA
12	94072653	CRADD	0.0754564	0.06241	4	0.7695	1	0.09064	2	0.09596	4	0.4992	2
13	113980104	GRTP1	0.0756117	0.03487	4	0.1074	1	NA	NA	0.4346	6	0.4958	3
16	75661803	KARS	0.0757096	0.02198	3	0.3996	3	0.3572	6	0.1278	8	0.523	4
13	103418924	TEX30	0.0757258	0.08021	2	NA	NA	NA	NA	0.1803	3	NA	NA
18	55221618	FECH	0.0757553	0.1248	4	0.6599	5	0.05283	4	0.06924	7	0.6968	5
1	33291818	S100PBP	0.0758532	0.008469	2	0.1605	2	0.6516	3	0.7441	5	0.3192	1
12	57994754	PIP4K2C	0.075953	0.01671	3	0.5187	1	0.8369	4	0.0379	5	0.7669	2
1	155723008	GON4L	0.0760039	0.2589	12	0.5709	4	0.06296	6	0.02534	14	0.8951	5
10	105727558	SLK	0.0761199	0.7644	6	0.3408	3	0.001924	10	0.6556	12	0.644	5
17	4058111	CYB5D2	0.0762265	0.2722	2	0.9338	1	0.04925	2	0.2927	7	0.05789	4
13	48807577	ITM2B	0.076228	NA	NA	0.04642	1	NA	NA	0.3141	2	NA	NA
3	147108757	ZIC4	0.0762468	0.3703	2	0.6971	3	0.03585	3	0.04627	7	0.4956	3
13	77566090	CLN5	0.0762775	0.8041	3	0.816	11	NA	NA	0.005053	2	NA	NA
2	209025531	CRYGA	0.0763415	0.8288	3	0.2536	2	0.2093	3	0.006713	5	0.7201	3
18	30672840	C18orf34	0.0764631	0.7454	10	0.5081	1	0.03373	5	0.03057	12	0.546	4
1	173155860	TNFSF4	0.0765184	NA	NA	NA	NA	0.07181	1	0.204	1	NA	NA
3	169539812	LRRIQ4	0.0765217	0.05615	1	0.3143	3	0.04033	2	0.8241	4	0.364	1
10	44873247	CXCL12	0.0765223	0.4439	1	0.9187	2	0.007935	4	0.1064	3	0.6201	3
12	48057312	RPAP3	0.0765684	0.06255	3	0.8928	3	0.6195	3	0.006242	6	0.9897	3
9	130269174	FAM129B	0.0765712	0.1367	9	0.05839	6	0.4568	12	0.09321	15	0.6289	11
3	47374789	KLHL18	0.0767374	0.7285	1	NA	NA	NA	NA	0.02018	2	NA	NA
6	131466445	AKAP7	0.0767561	0.109	4	0.1501	3	0.2347	3	0.1638	10	0.3412	4
8	117658787	EIF3H	0.0769298	0.8455	1	NA	NA	0.03506	2	0.1132	3	NA	NA
5	73932199	ENC1	0.0769303	NA	NA	NA	NA	0.9103	1	0.0162	1	NA	NA
19	12800595	FBXW9	0.0769761	0.03608	5	0.5215	2	0.04254	2	0.6144	5	0.4385	1
6	139229872	REPS1	0.0769842	0.4543	3	0.03039	2	0.605	5	0.05622	11	0.4593	4
5	149740732	TCOF1	0.0770704	0.3878	13	0.0313	9	0.9904	11	0.4575	21	0.03929	8
2	169939874	DHRS9	0.0771032	0.002867	3	0.1398	2	0.6874	5	0.9003	5	0.8718	1
19	30935704	ZNF536	0.0772492	0.04894	4	0.2311	4	0.1325	8	0.1588	9	0.9116	5
16	89940232	TCF25	0.0773041	0.7575	2	0.5589	6	0.25	6	0.003221	8	0.6371	4
15	72454690	GRAMD2	0.077431	0.07556	6	0.3558	3	0.4726	3	0.1254	4	0.1367	3
10	35858030	CCNY	0.0774403	0.03425	2	NA	NA	NA	NA	0.4341	2	NA	NA
1	117087019	CD58	0.077482	0.5006	1	NA	NA	NA	NA	0.02972	1	NA	NA
17	1451591	PITPNA	0.0776315	NA	NA	0.9929	1	NA	NA	0.01502	2	NA	NA
9	26842442	CAAP1	0.077636	0.4587	3	0.8922	2	0.5321	2	0.02355	3	0.04266	2
5	147695218	SPINK7	0.0777147	0.4495	1	NA	NA	0.2459	1	0.7369	2	0.01034	3
11	82921450	ANKRD42	0.0778017	0.01016	4	0.4234	7	0.4164	5	0.3647	8	0.3361	4
20	56227170	PMEPA1	0.0778998	0.01992	2	0.9346	2	0.954	2	0.1211	2	0.1023	1
19	17547292	TMEM221	0.0779892	NA	NA	0.01946	1	0.2531	1	0.643	1	0.2674	1
13	48619855	NUDT15	0.0780025	NA	NA	NA	NA	0.09485	2	0.1153	1	0.3129	2
19	3613346	CACTIN	0.0781193	0.03071	2	NA	NA	NA	NA	0.4894	2	NA	NA
16	4847489	ROGDI	0.0781944	0.268	1	0.02791	1	0.05552	2	0.8645	3	0.6168	1
2	176981933	HOXD10	0.0782552	NA	NA	NA	NA	0.01363	3	0.7484	4	0.337	1
21	46032067	KRTAP10-8	0.0783103	0.06961	4	0.089	1	NA	NA	0.4999	3	0.2752	2
5	113831758	KCNN2	0.07838	0.07838	1	NA	NA	NA	NA	NA	NA	NA	NA
1	228879176	RHOU	0.0784	NA	NA	NA	NA	NA	NA	0.0784	2	NA	NA
8	25317913	CDCA2	0.0784134	0.9171	9	0.7227	8	0.02772	14	0.5992	25	0.02021	13
13	41508049	ELF1	0.0784626	0.456	5	0.9758	5	0.7141	6	0.02198	13	0.03189	8
8	144789624	CCDC166	0.07847	0.07847	1	NA	NA	NA	NA	NA	NA	NA	NA
15	41276477	INO80	0.078527	0.4894	8	0.3846	4	0.2795	7	0.005951	15	0.7124	8
16	48577065	N4BP1	0.0786094	NA	NA	0.6568	3	0.7977	2	0.09888	2	0.01655	4
9	95608634	ZNF484	0.0786102	0.4649	4	0.6818	1	0.4838	8	0.2606	8	0.005591	4
11	125831676	CDON	0.0786209	0.1798	11	0.742	5	0.1098	4	0.4904	13	0.03111	7
10	43971579	ZNF487P	0.07864	NA	NA	0.07864	1	NA	NA	NA	NA	NA	NA
15	30927362	ARHGAP11B	0.0787763	NA	NA	NA	NA	0.2045	1	0.07426	1	NA	NA
11	47376831	SPI1	0.07886	NA	NA	NA	NA	NA	NA	0.07886	2	NA	NA
15	66995657	SMAD6	0.0789864	0.03052	2	0.8437	2	0.8447	2	0.01888	2	0.5485	1
1	170115331	METTL11B	0.0790293	0.1213	4	0.712	4	0.3311	4	0.01998	4	0.3946	4
20	62038277	KCNQ2	0.0790376	0.08348	3	0.04567	3	0.5755	2	0.3941	2	NA	NA
2	20974570	C2orf43	0.0791224	0.7046	3	0.001798	3	0.6059	5	0.6197	7	0.4749	5
12	39688239	KIF21A	0.0791517	0.03512	9	0.102	5	0.1679	6	0.4722	13	0.7959	7
3	50334462	NAT6	0.0791882	NA	NA	0.9127	2	0.358	2	0.004081	3	0.6504	2
2	210887734	KANSL1L	0.0793033	0.2266	7	0.2053	3	0.005972	6	0.8508	10	0.9594	5
19	49167929	NTN5	0.0793513	0.1888	2	0.3232	5	0.025	3	0.926	7	0.1607	4
11	102076653	YAP1	0.0794099	NA	NA	NA	NA	0.6151	1	0.5753	2	0.009918	1
8	53477798	FAM150A	0.07942	0.07942	1	NA	NA	NA	NA	NA	NA	NA	NA
8	79578393	ZC2HC1A	0.0795811	0.01719	3	0.3064	2	0.2055	3	0.3189	5	0.6609	2
6	56963934	ZNF451	0.079605	0.03926	4	0.411	2	0.4421	4	0.1358	6	0.2356	3
4	152499143	FAM160A1	0.0796347	0.254	4	0.6425	7	0.03947	8	0.05715	7	0.6204	7
11	1015828	MUC6	0.0796351	0.9123	15	0.1933	20	0.2741	18	0.008015	24	0.5895	16
18	7888223	PTPRM	0.0799258	0.09906	6	0.612	1	0.6321	4	0.02199	13	0.2727	6
11	5461834	OR51I1	0.079932	0.09744	7	0.7383	3	0.01074	6	0.3989	7	0.7457	5
3	31674551	STT3B	0.0799612	NA	NA	NA	NA	0.9514	2	0.01626	2	NA	NA
3	169801881	GPR160	0.0799755	0.03281	1	NA	NA	NA	NA	0.4716	3	NA	NA
19	50209247	CPT1C	0.0800285	0.9951	4	0.006367	3	0.4168	8	0.1158	11	0.7531	7
5	139661097	PFDN1	0.0800296	NA	NA	NA	NA	0.01179	1	0.3302	1	0.9115	1
5	31799371	PDZD2	0.0800436	0.1054	29	0.3848	14	0.7902	25	0.01385	44	0.519	21
11	18727448	IGSF22	0.0802225	0.05517	17	0.1245	12	0.4058	17	0.1126	27	0.7368	15
10	98741293	C10orf12	0.0803544	0.3327	14	0.6172	4	0.1827	8	0.006241	15	0.9904	14
5	43492357	C5orf34	0.0803577	0.1593	6	NA	NA	0.04121	4	0.2401	7	0.563	5
1	7845014	PER3	0.0803854	0.2663	20	0.4311	12	0.5125	14	0.1442	22	0.02735	13
16	24788645	TNRC6A	0.0804038	0.9476	11	0.6821	14	0.7233	23	0.1044	28	0.004756	16
17	8656662	SPDYE4	0.0805732	0.004871	3	0.759	1	0.2014	2	0.3738	2	0.837	3
2	31457653	EHD3	0.0805814	0.07259	4	0.672	3	0.08514	4	0.2146	6	NA	NA
3	36526482	STAC	0.0805907	0.3027	4	0.05441	2	NA	NA	0.2176	5	NA	NA
7	23757162	STK31	0.0806381	0.04935	9	0.6297	6	0.6596	7	0.06675	16	0.1705	6
14	62229285	SNAPC1	0.080722	NA	NA	0.9761	3	0.2894	6	0.08154	4	0.0388	5
10	118351401	PNLIPRP1	0.0807259	0.01712	3	0.419	1	0.6469	3	0.166	8	0.3034	3
15	43489546	EPB42	0.0807428	0.01145	9	0.5673	6	0.6123	9	0.1068	12	0.5504	7
16	15761154	NDE1	0.0808893	0.3452	4	NA	NA	NA	NA	0.04546	2	NA	NA
2	219540844	STK36	0.0808961	0.1758	13	0.2914	6	0.473	7	0.1516	17	0.06385	12
13	28750652	PAN3	0.0809456	0.3783	2	0.942	3	0.01737	2	0.1853	2	0.2047	2
1	3379844	ARHGEF16	0.0809484	0.6807	6	0.7352	2	0.3567	4	0.01456	8	0.09034	4
10	51027411	PARG	0.08105	NA	NA	NA	NA	NA	NA	0.08105	2	NA	NA
14	39736680	CTAGE5	0.0810678	0.07285	3	0.4771	2	0.1942	4	0.1373	9	0.254	6
17	61176602	TANC2	0.0814604	0.8741	3	0.9367	1	0.001282	5	0.5134	12	0.4404	4
17	15611546	AC005324.8-001	0.0814697	NA	NA	0.6846	1	0.9862	3	0.1331	4	0.01009	2
17	15611546	ZNF286A	0.0814697	NA	NA	0.6846	1	0.9862	3	0.1331	4	0.01009	2
19	49564630	NTF4	0.0815335	0.1108	2	0.03557	2	0.2275	2	0.4813	2	0.5508	2
10	5690980	ASB13	0.0815369	0.4028	2	0.1156	1	0.5546	5	0.03516	5	0.2618	3
4	113565835	LARP7	0.0816654	0.00808	3	NA	NA	0.4028	3	0.4768	4	0.5865	2
2	106739497	UXS1	0.0816732	0.7598	1	0.1463	1	0.1487	2	0.05507	1	NA	NA
14	47120557	RPL10L	0.0817477	0.00823	2	0.586	2	0.4898	2	0.3859	3	NA	NA
20	33439108	GGT7	0.0818097	0.217	2	0.3965	2	NA	NA	0.04255	4	NA	NA
17	3513940	SHPK	0.0818706	0.1778	5	0.2168	3	0.5352	6	0.8678	10	0.01337	6
5	178408768	GRM6	0.0819103	0.9914	24	0.1046	9	0.02651	12	0.4718	25	0.1847	11
1	100672060	DBT	0.0820126	0.01676	5	0.1098	3	0.2362	3	0.8169	7	0.6761	5
12	18891318	CAPZA3	0.0820868	0.3907	2	0.3361	5	0.009523	6	0.2499	11	0.7694	6
1	110200478	GSTM4	0.0821521	0.1831	1	0.08737	1	NA	NA	NA	NA	NA	NA
6	150157367	LRP11	0.0822096	0.6207	3	0.04519	1	0.3813	2	0.2083	6	0.1082	2
2	159663599	DAPL1	0.0822387	0.7945	2	0.1407	1	0.2971	4	0.3505	5	0.02072	4
3	20017598	RAB5A	0.08226	NA	NA	NA	NA	NA	NA	0.08226	1	NA	NA
3	124048784	KALRN	0.0823169	0.4134	11	0.4289	16	0.01416	20	0.9279	29	0.1037	17
1	35562965	ZMYM1	0.08237	0.5368	5	0.9346	3	0.2007	4	0.003203	8	0.7499	5
1	208207839	PLXNA2	0.0824421	0.02675	11	0.02378	6	0.4856	13	0.9019	15	0.8694	7
12	51749641	GALNT6	0.0825003	0.354	4	0.03602	3	0.4134	4	0.7533	10	0.06107	4
14	24769389	NOP9	0.0825187	0.381	8	0.004117	5	0.3976	9	0.4373	11	0.8895	5
14	60976181	SIX6	0.0825311	0.1173	2	0.08317	2	0.507	2	0.0776	2	0.6322	2
17	36991482	C17orf98	0.0826072	0.01562	2	0.7461	1	NA	NA	0.3185	2	NA	NA
5	72863177	UTP15	0.0828105	0.4876	3	NA	NA	0.636	4	0.1862	7	0.01611	4
3	132409455	NPHP3	0.0828309	0.2354	4	0.3213	8	0.2779	14	0.3317	22	0.03502	11
22	50964207	TYMP	0.082866	NA	NA	0.133	6	0.2854	4	0.2041	9	0.1202	3
16	9858502	GRIN2A	0.0828851	0.02637	7	0.438	3	0.3234	8	0.07476	8	0.8753	6
20	62124590	EEF1A2	0.082926	0.3151	1	0.02368	4	0.06779	1	0.6617	1	0.7309	1
19	48715205	CARD8	0.0829298	0.1768	10	0.6513	8	0.9503	9	0.3165	11	0.007064	10
11	76164411	C11orf30	0.0829303	0.1213	5	NA	NA	0.06408	2	0.9234	7	0.1299	4
7	150027513	C7orf29	0.08296	0.09545	3	0.0803	1	0.9971	3	0.1014	6	0.3159	3
6	49753825	PGK2	0.0829745	0.3414	3	NA	NA	0.01125	1	0.2551	9	0.9524	5
19	49573438	KCNA7	0.0830877	0.1459	2	NA	NA	NA	NA	0.1112	1	NA	NA
3	64507857	ADAMTS9	0.0831525	0.2075	15	0.2058	7	0.9174	18	0.0343	19	0.1829	13
17	3101542	OR1A2	0.0833761	0.2986	3	0.2864	2	0.3237	3	0.408	3	0.02186	3
13	21148610	IFT88	0.0834111	0.4719	10	0.3071	1	0.3208	4	0.04255	9	0.1249	3
2	217279768	SMARCAL1	0.0834168	0.2077	12	0.4686	5	0.7624	5	0.04071	12	0.0818	2
1	10535049	PEX14	0.0834203	0.01039	2	NA	NA	0.324	3	0.4153	6	0.6731	3
12	98926721	TMPO	0.0835171	0.007388	10	0.4737	4	0.2132	6	0.4126	11	0.8043	8
5	42800866	SEPP1	0.0835182	0.6558	5	0.7768	5	0.0009075	5	0.7236	6	0.7402	4
8	120847188	DSCC1	0.0835644	NA	NA	0.05451	1	0.2511	3	0.06934	2	0.9942	2
5	167379643	ODZ2	0.0835661	0.548	15	0.1065	11	0.08444	13	0.4902	28	0.1026	11
2	209106854	IDH1	0.08361	NA	NA	NA	NA	NA	NA	0.08361	2	NA	NA
9	135139826	SETX	0.0836402	0.9943	17	0.3383	22	0.6594	22	0.04473	32	0.02502	14
1	113162492	CAPZA1	0.0836425	0.07731	5	0.1659	4	0.04441	2	0.9458	3	0.4608	2
1	171673668	VAMP4	0.08373	0.08373	1	NA	NA	NA	NA	NA	NA	NA	NA
4	25759334	SEL1L3	0.0837387	0.00464	3	0.3372	5	0.8473	8	0.3033	15	0.6186	5
19	4491642	CTB-50L17.10	0.0837892	0.9041	2	0.08872	3	0.1142	7	0.2067	6	0.1315	7
1	32119590	COL16A1	0.0839573	0.01972	16	0.7712	6	0.7993	13	0.03767	26	0.5456	13
6	155579035	TFB1M	0.0839778	0.9438	4	0.09599	1	0.09629	6	0.03807	7	0.7526	4
1	227843003	ZNF678	0.0842954	0.1229	2	NA	NA	0.1344	1	NA	NA	NA	NA
9	91653075	SHC3	0.084301	0.5097	3	0.3444	1	0.625	2	0.009035	4	0.2538	2
5	79616083	SPZ1	0.0843566	0.7087	4	0.5248	2	0.9158	2	0.02295	3	0.03222	2
16	67696365	PARD6A	0.0844952	0.1211	2	NA	NA	NA	NA	0.1368	1	NA	NA
17	18148505	FLII	0.0845846	0.2557	11	0.008486	6	0.5873	5	0.9154	17	0.2169	5
11	130750592	SNX19	0.0847189	0.4079	6	0.02131	5	0.04915	5	0.8906	7	0.6668	2
13	37583831	FAM48A	0.0847374	0.1181	2	0.04449	3	NA	NA	0.7325	6	NA	NA
7	89903356	C7orf63	0.0848174	0.002569	6	0.3444	1	0.7269	4	0.4414	10	0.8955	5
11	118894071	TRAPPC4	0.0848294	0.3804	2	0.3084	1	0.1187	2	0.05388	4	0.3389	4
16	57059427	NLRC5	0.0848375	0.002384	15	0.3487	10	0.9998	13	0.6541	20	0.4678	12
14	45679701	MIS18BP1	0.0848415	0.1039	13	0.2146	3	0.131	12	0.43	22	0.2025	12
5	74842875	POLK	0.0848992	0.2868	7	0.0241	4	0.1446	7	0.348	10	0.7321	7
22	32330282	C22orf24	0.0849	NA	NA	NA	NA	NA	NA	0.0849	3	NA	NA
6	28213219	ZKSCAN4	0.0849415	0.5707	2	0.09412	4	0.08409	4	0.8768	5	0.06435	4
2	219127769	GPBAR1	0.0850786	0.1327	3	NA	NA	0.1471	1	0.1983	2	NA	NA
22	20100674	TRMT2A	0.0852474	0.04942	5	0.682	6	0.07682	3	0.4893	8	0.2024	5
22	38259334	EIF3L	0.08525	NA	NA	NA	NA	NA	NA	0.08525	2	NA	NA
19	54496329	CACNG6	0.0852851	NA	NA	0.3266	1	NA	NA	0.01552	3	0.7663	2
2	10908893	ATP6V1C2	0.0853221	0.3471	2	0.5037	1	0.2323	5	0.1613	5	0.0392	4
2	37439056	CEBPZ	0.0854206	0.3238	8	0.3065	6	0.6804	7	0.1007	12	0.03784	6
1	28661302	MED18	0.0854732	0.2955	1	NA	NA	0.1189	4	0.1109	4	NA	NA
7	77423392	TMEM60	0.0855004	0.2837	3	NA	NA	0.02269	1	0.4233	1	0.359	1
4	74442349	RASSF6	0.0855617	0.08057	4	0.1101	1	0.8632	8	0.07429	8	0.4536	4
1	112998755	CTTNBP2NL	0.0856325	0.9059	3	0.8686	2	0.3787	5	0.00235	7	0.369	5
1	242253166	PLD5	0.0856537	NA	NA	0.1089	3	0.32	1	0.03521	3	0.7995	2
3	187088612	RTP4	0.0856671	0.01999	3	0.2488	1	0.0851	3	0.6897	4	0.8858	2
17	79287477	TMEM105	0.0857543	0.2354	2	0.05545	1	0.2866	1	0.5032	3	0.1376	3
8	193756	ZNF596	0.0857893	0.5593	4	0.08501	3	0.6704	4	0.6693	8	0.01215	6
4	156135155	NPY2R	0.0858929	0.4257	3	NA	NA	0.5343	3	0.05599	2	0.07737	3
6	107780209	PDSS2	0.0859199	0.2806	1	NA	NA	0.6286	3	0.0264	3	0.2117	2
8	618647	ERICH1	0.0859569	0.1144	13	0.8897	1	0.239	3	0.1664	14	0.06425	4
8	43002177	HGSNAT	0.0860144	0.4241	5	0.04408	8	0.04096	3	0.8031	9	0.4234	3
7	36895295	ELMO1	0.0860545	0.09328	2	0.04571	4	0.9928	6	0.3437	6	0.1791	4
3	186760560	ST6GAL1	0.0860596	0.02616	2	NA	NA	NA	NA	0.6479	1	NA	NA
8	12943382	DLC1	0.0861056	0.07091	11	0.07268	10	0.421	13	0.9854	24	0.122	10
2	220146676	DNAJB2	0.08611	0.08611	3	NA	NA	NA	NA	NA	NA	NA	NA
11	56057898	OR8H1	0.086166	0.03136	5	0.5413	1	NA	NA	NA	NA	NA	NA
21	47706997	YBEY	0.0862089	0.4546	4	NA	NA	0.05402	1	0.9743	1	0.04142	1
4	44712970	GNPDA2	0.0862097	0.697	1	NA	NA	NA	NA	0.02437	2	NA	NA
19	47909743	MEIS3	0.0863916	0.01068	3	0.1906	2	0.5709	4	0.293	5	0.7704	4
2	68361859	WDR92	0.0864681	0.2147	2	NA	NA	NA	NA	0.07941	2	NA	NA
16	84188191	DNAAF1	0.0865496	0.03862	10	0.1097	7	0.2183	5	0.4724	15	0.6023	7
3	47539870	ELP6	0.08656	NA	NA	0.3877	3	0.01888	3	0.542	5	NA	NA
19	18285944	IFI30	0.0865675	NA	NA	0.05495	1	0.9587	3	0.07116	5	0.2661	1
17	18181411	TOP3A	0.0865703	0.298	5	0.04506	8	0.184	12	0.2818	17	0.3781	9
11	124440362	OR8A1	0.0866042	0.8849	3	0.03773	1	0.2458	5	0.05831	6	0.5505	3
7	127950857	RBM28	0.0866323	0.01816	10	0.1886	6	0.682	11	0.1438	13	0.7847	7
12	86373159	MGAT4C	0.0866794	0.1714	3	NA	NA	0.3323	2	0.1846	2	0.09507	2
3	157271056	C3orf55	0.0867114	0.5052	3	0.7657	2	0.08597	3	0.8203	4	0.009677	2
13	42874710	AKAP11	0.086724	0.00601	9	0.8738	9	0.1214	15	0.4498	35	0.9208	17
12	5603600	NTF3	0.0868207	NA	NA	0.9259	2	0.1722	1	0.488	2	0.01288	1
6	136667015	MAP7	0.0868745	0.2878	10	0.1061	3	0.7345	7	0.2831	13	0.04171	7
8	7215821	ZNF705G	0.08688	NA	NA	0.08688	1	NA	NA	NA	NA	NA	NA
3	52740182	SPCS1	0.0869138	NA	NA	0.4047	1	0.1292	1	0.02647	1	0.7253	1
3	49039984	P4HTM	0.0869711	0.004915	4	0.4876	1	0.3433	2	0.3888	4	0.8295	2
1	208061142	CD34	0.0870153	0.004789	5	NA	NA	0.2667	5	0.8543	5	0.9217	4
1	217604632	GPATCH2	0.0870933	0.666	4	0.7023	3	0.5729	3	0.005377	8	0.1846	4
1	24383918	MYOM3	0.0872392	0.2208	17	0.2992	14	0.02764	17	0.1468	41	0.9951	17
15	41793943	ITPKA	0.087375	0.6723	2	0.6611	1	0.0286	3	0.02963	3	0.7101	3
12	105504953	KIAA1033	0.0875121	0.5693	8	0.297	3	0.2556	8	0.008462	10	0.7333	8
3	45869972	LZTFL1	0.0875857	NA	NA	NA	NA	NA	NA	0.03901	4	0.4441	2
15	80445406	FAH	0.0876087	0.01532	6	0.4819	2	NA	NA	0.5467	8	NA	NA
11	96124337	JRKL	0.08763	NA	NA	NA	NA	NA	NA	0.08763	2	NA	NA
6	126278230	HINT3	0.0877273	0.01027	2	0.5953	2	0.1813	1	0.6448	2	0.3768	1
19	50435862	ATF5	0.0878558	0.03636	1	0.2126	2	0.6406	2	0.2062	2	NA	NA
11	6622218	RRP8	0.0878782	0.176	4	0.4458	6	0.8338	4	0.5054	10	0.008169	4
19	8651059	ADAMTS10	0.0878863	0.7185	4	0.4694	4	0.2781	4	0.01504	10	0.1915	4
11	129979475	APLP2	0.0878899	0.1754	7	0.007285	1	0.9347	7	0.3841	8	0.5889	6
5	65307924	ERBB2IP	0.0878989	0.9862	10	0.8093	5	0.04244	7	0.1261	10	0.06326	5
16	21689879	OTOA	0.0879544	0.601	4	0.7578	4	0.02465	2	0.03735	5	0.6451	3
3	10146208	C3orf24	0.0879788	0.77	1	0.4336	2	0.1283	5	0.02389	3	NA	NA
7	30487951	NOD1	0.0879829	0.01731	6	0.5661	6	0.5986	12	0.7318	19	0.06305	7
2	58276070	VRK2	0.0880013	0.2396	3	0.05597	2	0.05459	2	0.8931	8	0.4141	4
15	45427756	DUOX1	0.0880489	0.8235	6	0.004649	7	0.4993	13	0.3222	21	0.44	15
12	96640857	ELK3	0.0880629	NA	NA	0.3596	3	0.1641	4	0.8893	6	0.01953	4
19	58197876	ZNF551	0.0881136	0.3013	4	0.01633	1	0.1122	4	0.6593	6	0.7455	4
10	129899556	MKI67	0.0883494	0.134	36	0.5983	19	0.02355	27	0.9012	46	0.1602	27
7	56051427	GBAS	0.0883571	0.2113	1	NA	NA	0.8501	3	0.00608	4	0.9434	3
17	42475271	GPATCH8	0.088387	0.3034	9	0.1357	6	0.8444	10	0.05514	14	0.1423	9
7	150645534	KCNH2	0.088437	0.2057	2	0.03305	89	0.883	1	0.06358	6	0.7154	3
10	27048077	ABI1	0.0885008	0.006228	3	0.9209	1	0.8817	2	0.8825	3	0.06126	2
16	87741990	KLHDC4	0.088598	0.2373	7	0.2098	6	0.5989	10	0.01172	16	0.7838	6
4	146695709	ZNF827	0.0886319	0.04827	6	0.8084	2	0.4352	9	0.2353	15	0.06859	4
15	90808964	NGRN	0.0886374	0.4471	3	0.07388	1	0.4139	5	0.03084	4	0.6501	2
11	66032649	KLC2	0.0887183	0.06254	1	0.01141	1	0.7702	3	0.7001	2	0.7135	3
5	75428021	SV2C	0.0887783	0.2458	3	0.7878	3	0.08146	5	0.1028	10	0.1695	3
16	10626869	EMP2	0.0889053	0.4214	3	0.6916	3	0.771	2	0.006589	10	0.1861	4
17	27182063	ERAL1	0.0889365	0.1877	3	0.7034	1	0.8974	1	0.002494	3	0.933	2
19	56113512	ZNF524	0.0889922	0.05077	2	0.5745	1	0.09771	1	0.483	1	0.2005	1
3	12393125	PPARG	0.08912	NA	NA	0.08912	4	NA	NA	NA	NA	NA	NA
11	94759940	KDM4E	0.089353	0.3297	2	0.2369	4	0.8957	3	0.02252	4	0.1764	4
9	140034184	GRIN1	0.08946	0.08946	1	NA	NA	NA	NA	NA	NA	NA	NA
6	32154448	PBX2	0.0896028	0.1998	1	0.06415	2	NA	NA	0.3252	1	NA	NA
2	25013402	PTRHD1	0.08961	NA	NA	NA	NA	NA	NA	0.08961	1	NA	NA
6	16130851	MYLIP	0.0896166	0.3082	3	0.2358	1	0.5427	3	0.103	6	0.06876	5
20	43042364	HNF4A	0.0896342	0.2076	2	0.466	14	0.009646	3	0.6654	6	0.45	3
5	139876684	ANKHD1	0.0897506	0.3214	4	0.6913	1	0.01181	3	0.3203	8	0.3332	4
5	139876684	ANKHD1-EIF4EBP3	0.0897506	0.3214	4	0.6913	1	0.01181	3	0.3203	8	0.3332	4
18	12951878	SEH1L	0.08981	0.08981	3	NA	NA	NA	NA	NA	NA	NA	NA
10	5204928	AKR1CL1	0.0898161	0.08699	1	0.2055	1	NA	NA	NA	NA	NA	NA
19	2039727	MKNK2	0.0900393	0.4277	5	0.1872	1	0.9582	1	0.01366	4	0.2687	3
11	1775095	CTSD	0.0900661	0.3022	1	NA	NA	NA	NA	NA	NA	0.05936	3
13	80095030	NDFIP2	0.0900704	0.5985	3	0.01709	1	0.7677	2	0.2436	2	0.1473	1
3	69158262	LMOD3	0.0900761	0.7847	6	0.5964	3	0.9454	2	0.4941	6	0.001289	4
20	2290333	TGM3	0.0902573	0.0257	5	0.4668	5	0.5511	7	0.04729	11	0.9044	6
19	19447991	MAU2	0.09028	NA	NA	NA	NA	0.09028	1	NA	NA	NA	NA
6	27840926	HIST1H4L	0.0903559	NA	NA	0.1097	1	NA	NA	0.1099	2	0.3499	1
7	99319925	CYP3A7	0.0903686	NA	NA	NA	NA	0.6631	1	0.04752	1	0.1339	1
19	44619988	ZNF225	0.090482	0.2444	3	0.04152	3	0.9883	7	0.05436	13	0.5209	6
2	201462152	AOX1	0.0904831	0.002909	10	0.5411	4	0.3544	5	0.7396	14	0.6883	3
6	153042907	MYCT1	0.0904881	0.9908	3	0.517	2	0.3123	3	0.0339	5	0.05237	4
2	37469792	C2orf56	0.0907119	0.2607	3	0.1415	1	NA	NA	0.115	6	NA	NA
2	97508139	ANKRD23	0.0907252	0.2732	2	0.02058	1	0.1263	2	0.6035	5	0.6657	1
19	1041871	ABCA7	0.0907814	0.4577	23	0.6748	12	0.5143	23	0.05445	41	0.03302	17
1	154991027	DCST2	0.0908157	0.02878	10	0.1931	9	0.4983	15	0.4336	20	0.238	9
4	119610560	METTL14	0.0911619	NA	NA	0.2677	1	NA	NA	0.06803	2	NA	NA
3	113165480	SPICE1	0.0911654	0.2003	9	0.007192	4	0.5325	6	0.6641	8	0.5647	6
4	189060768	TRIML1	0.091172	0.4708	7	NA	NA	0.03739	4	0.1723	9	0.357	4
11	119213319	MFRP	0.0912	0.1405	7	0.02461	4	0.2198	9	0.5694	13	0.6652	10
18	6948489	LAMA1	0.0912265	0.7914	31	0.4782	25	0.01015	33	0.1086	52	0.6904	25
7	100027688	MEPCE	0.0914323	NA	NA	0.2653	1	NA	NA	0.0689	2	NA	NA
12	14927610	H2AFJ	0.0917	NA	NA	0.0917	2	NA	NA	NA	NA	NA	NA
6	27277051	POM121L2	0.0917934	0.8455	8	0.7291	5	0.3972	8	0.2393	8	0.004968	6
6	90642195	BACH2	0.0919	0.6023	8	0.9817	3	0.865	7	0.002294	9	0.2486	5
21	46117792	KRTAP10-12	0.09191	NA	NA	0.09191	1	NA	NA	NA	NA	NA	NA
8	87497116	FAM82B	0.0919442	0.1211	3	NA	NA	NA	NA	0.152	4	NA	NA
11	67799622	NDUFS8	0.0920217	0.3354	1	0.008425	4	0.5691	1	0.1936	2	0.939	1
12	14943486	WBP11	0.0920753	NA	NA	0.0995	3	0.4535	3	0.02961	1	0.8232	2
4	74702951	CXCL6	0.09209	0.09209	1	NA	NA	NA	NA	NA	NA	NA	NA
1	100459132	SLC35A3	0.0921558	NA	NA	NA	NA	0.6974	2	0.02647	2	NA	NA
1	151142995	TMOD4	0.0921559	0.0439	4	0.4108	2	0.1696	4	0.1165	9	0.8225	2
1	183616866	APOBEC4	0.0922744	NA	NA	0.08603	2	0.4086	3	0.433	3	0.07251	2
6	33690597	IP6K3	0.0925382	0.008407	12	0.43	5	0.2044	6	0.802	15	0.4981	9
6	14131844	CD83	0.09266	NA	NA	NA	NA	NA	NA	0.09266	3	NA	NA
19	48495314	BSPH1	0.09292	NA	NA	NA	NA	NA	NA	0.09292	1	NA	NA
11	44940828	TSPAN18	0.0929991	0.9086	1	NA	NA	NA	NA	0.02055	2	NA	NA
5	150275254	ZNF300	0.0930321	0.6825	3	NA	NA	NA	NA	0.02737	3	NA	NA
19	55824332	TMEM150B	0.0930471	0.07777	2	0.03827	3	0.2616	3	0.5654	3	0.6769	4
5	149825239	RPS14	0.09324	NA	NA	NA	NA	NA	NA	0.09324	1	NA	NA
2	110303072	2021-09-10	0.0932683	NA	NA	0.2862	1	0.09766	3	0.3782	5	0.1062	3
15	52427943	GNB5	0.0933704	NA	NA	0.9961	2	0.6506	3	0.7285	4	0.002382	2
15	48056050	SEMA6D	0.0933953	0.0176	5	1	1	0.2963	3	0.213	8	0.27	2
16	20423000	ACSM5	0.0934727	0.6375	6	0.2678	7	0.1136	3	0.0329	8	0.4707	5
11	18291289	SAA1	0.0935074	0.02375	2	0.8004	2	NA	NA	0.2331	1	NA	NA
22	32586878	RFPL2	0.0935268	NA	NA	0.3883	2	NA	NA	0.01273	1	0.8967	1
3	38167080	ACAA1	0.093602	0.8102	2	0.07389	2	0.3351	3	0.1097	5	0.1368	5
10	34400423	PARD3	0.0936264	0.221	7	0.02529	4	0.6639	6	0.1889	13	0.4297	6
9	75315438	TMC1	0.093739	0.7323	4	0.003363	5	0.7707	6	0.3347	11	0.4751	6
4	37633026	RELL1	0.093746	NA	NA	NA	NA	0.0441	3	0.1062	7	0.9496	2
14	34985658	EAPP	0.0938139	0.9516	4	0.4663	3	0.8489	4	0.1141	5	0.007032	3
15	100211780	MEF2A	0.0938921	NA	NA	0.1068	3	0.124	4	0.2105	4	0.407	4
15	93173517	FAM174B	0.0939132	0.5987	2	NA	NA	0.04433	1	0.168	3	NA	NA
8	51449245	SNTG1	0.0939695	0.6363	1	0.05827	6	0.1516	7	0.07403	6	0.7284	6
12	81112735	MYF5	0.0939794	0.2661	1	0.3405	1	NA	NA	0.04926	3	NA	NA
11	93483581	C11orf54	0.0940804	0.03213	5	NA	NA	NA	NA	0.5896	3	NA	NA
1	145293490	NBPF10	0.09411	NA	NA	0.09411	2	NA	NA	NA	NA	NA	NA
22	45127628	ARHGAP8	0.0941251	0.3223	24	0.5314	17	0.1986	23	0.05332	31	0.1676	22
1	110050180	AMIGO1	0.0941717	NA	NA	0.1655	1	0.7382	3	0.8185	6	0.0114	4
15	73614857	HCN4	0.0942606	NA	NA	0.03155	4	0.2476	5	0.2522	11	0.5795	3
5	96430474	LIX1	0.0942631	0.06409	4	0.2055	3	0.185	2	0.2185	1	0.5724	1
2	206581002	NRP2	0.0943565	0.03287	11	0.4802	4	0.6401	6	0.1905	13	0.1586	8
1	76779547	ST6GALNAC3	0.0944418	0.1736	2	NA	NA	0.1223	2	0.3969	3	0.1359	2
17	33520663	SLC35G3	0.0944432	0.07401	2	NA	NA	NA	NA	0.2572	1	NA	NA
11	114168675	NNMT	0.09457	NA	NA	NA	NA	NA	NA	0.09457	3	NA	NA
15	77750775	HMG20A	0.0946643	NA	NA	0.08251	1	0.7388	1	0.05928	2	0.3181	1
17	8243598	ODF4	0.0947668	NA	NA	0.3635	1	0.09785	1	0.127	4	NA	NA
4	144532644	FREM3	0.0949847	0.01631	6	0.9513	6	0.7212	11	0.1552	19	0.1778	13
3	44488386	ZNF445	0.0950068	0.8721	6	NA	NA	0.3995	7	0.004787	9	0.6932	6
9	116929987	COL27A1	0.0950077	0.4122	11	0.01409	6	0.8062	17	0.153	31	0.4312	12
2	239147490	HES6	0.0950542	NA	NA	NA	NA	NA	NA	0.08525	1	0.2251	2
2	242648673	ING5	0.0952158	0.3169	2	NA	NA	0.02617	2	0.5484	2	NA	NA
1	84356065	TTLL7	0.0952217	NA	NA	NA	NA	0.09437	4	0.06346	9	0.7595	5
17	45360730	RP11-290H9.2	0.0952721	0.07978	5	0.3893	9	0.03817	5	0.5091	7	0.5143	3
13	99449468	DOCK9	0.0953014	0.2774	8	0.1921	7	0.2879	10	0.02257	13	0.8969	8
1	150900299	SETDB1	0.0954189	0.1475	5	0.08256	4	0.3145	7	0.1415	9	0.5743	5
19	49979789	FLT3LG	0.0954827	0.3973	2	NA	NA	0.3603	2	NA	NA	0.0319	2
16	28883975	SH2B1	0.0956607	0.5318	3	0.6935	1	0.07837	4	0.04044	6	NA	NA
14	69967603	PLEKHD1	0.0957664	0.7263	5	0.4097	2	0.6476	2	0.05973	4	0.02721	2
19	13065096	GADD45GIP1	0.0959016	0.9853	1	0.1553	2	0.7009	2	0.5055	4	0.005791	3
19	55048281	KIR3DX1	0.09609	0.09609	1	NA	NA	NA	NA	NA	NA	NA	NA
1	176833427	ASTN1	0.0961229	0.2366	13	0.6428	2	0.1689	5	0.126	17	0.09739	7
4	56730507	EXOC1	0.0961276	0.9485	3	NA	NA	0.3425	1	0.9832	3	0.003688	2
19	49340746	PLEKHA4	0.0961617	0.1608	8	0.1579	9	0.1393	10	0.8382	16	0.1064	13
3	122629701	SEMA5B	0.0961663	0.1138	6	0.1013	4	0.8179	7	0.262	8	0.1277	8
5	139743389	SLC4A9	0.0962971	0.1799	4	0.5483	3	0.02157	8	0.4084	13	0.3639	7
2	62132910	COMMD1	0.09631	0.09631	2	NA	NA	NA	NA	NA	NA	NA	NA
6	13305382	TBC1D7	0.0963271	0.3639	8	0.8936	3	0.9684	5	0.03839	7	0.02617	3
17	6927958	BCL6B	0.09643	NA	NA	NA	NA	NA	NA	0.09643	3	NA	NA
3	30032626	RBMS3	0.0964876	0.03846	1	NA	NA	0.1623	2	0.3784	2	0.5017	2
1	201383672	TNNI1	0.09653	0.09653	1	NA	NA	NA	NA	NA	NA	NA	NA
15	34159749	AVEN	0.0965415	0.1841	4	0.03295	1	NA	NA	0.8299	3	0.2356	5
1	16349137	CLCNKA	0.0965882	0.4887	4	0.9977	6	0.0513	2	0.03144	6	0.4042	2
4	154631543	RNF175	0.0967109	0.5765	7	0.05233	6	0.8337	7	0.07168	10	0.1767	7
3	186301661	DNAJB11	0.09672	NA	NA	NA	NA	NA	NA	0.09672	3	NA	NA
7	107115313	GPR22	0.0967534	0.1447	1	0.3807	1	NA	NA	0.06818	1	0.3169	1
3	66430877	LRIG1	0.0968275	0.9855	26	0.02071	12	0.2139	17	0.2075	22	0.3524	14
4	111539637	PITX2	0.0970129	NA	NA	0.0573	2	0.4508	2	0.0573	2	0.8076	2
17	48646274	CACNA1G	0.0970165	0.1702	10	0.003716	6	0.88	6	0.926	12	0.6215	7
17	35902433	SYNRG	0.0970347	0.1181	6	0.4121	4	0.3171	5	0.0955	11	0.2174	5
12	95645827	VEZT	0.0970755	0.9811	5	0.1089	4	0.694	7	0.0808	10	0.05352	7
19	50939276	MYBPC2	0.0971297	0.8952	17	0.4688	8	0.9847	16	0.02867	19	0.02709	10
3	57131630	IL17RD	0.0973264	0.7672	7	0.112	6	0.01801	2	0.2356	9	0.8834	5
1	153516320	S100A4	0.0974	NA	NA	NA	NA	NA	NA	0.0974	3	NA	NA
19	41381717	CYP2A7	0.09766	NA	NA	0.09766	2	NA	NA	NA	NA	NA	NA
11	27371856	CCDC34	0.0977604	NA	NA	0.00615	2	0.944	6	0.359	8	0.5806	6
22	51117580	SHANK3	0.0977628	0.5835	2	0.3113	1	0.0118	2	0.4901	2	0.309	2
19	35648365	FXYD5	0.0977969	0.5144	3	NA	NA	NA	NA	0.03866	4	NA	NA
12	48501161	PFKM	0.0979602	0.4249	2	0.3415	3	0.03663	2	0.6551	3	0.09355	1
21	35757881	FAM165B	0.0979664	0.07915	2	NA	NA	NA	NA	0.2518	1	NA	NA
9	138012008	OLFM1	0.09805	NA	NA	NA	NA	NA	NA	0.09805	1	NA	NA
6	105606361	POPDC3	0.0982576	0.008012	3	NA	NA	0.9548	1	0.6221	2	NA	NA
6	122773119	SERINC1	0.0982682	0.6583	1	0.01981	1	0.3591	4	0.6904	7	0.1013	4
20	34055194	CEP250	0.0982734	0.1579	22	0.9876	3	0.2848	9	0.4148	30	0.01778	10
14	23886409	MYH7	0.0984063	0.4641	5	0.44	152	NA	NA	0.04582	3	0.1307	2
13	29236626	POMP	0.09841	NA	NA	0.09841	1	NA	NA	NA	NA	NA	NA
7	98984354	ARPC1B	0.0984228	NA	NA	0.8521	2	0.4336	2	0.5542	7	0.005974	5
11	44069719	ACCSL	0.098465	0.9044	5	0.132	3	0.0652	6	0.05209	11	0.8106	7
1	205027316	CNTN2	0.0985245	0.04434	3	0.3359	8	0.09272	8	0.3333	15	0.7148	11
6	29454676	MAS1L	0.0985583	0.6495	2	0.06837	7	0.149	7	0.6983	13	0.07125	7
6	159456938	TAGAP	0.0986436	0.1338	7	0.3821	2	0.5911	3	0.435	6	0.02508	3
16	67264083	FHOD1	0.0986989	0.1055	7	0.9761	3	0.5532	7	0.8478	9	0.006833	5
10	30728036	MAP3K8	0.0988398	0.698	4	0.06257	2	NA	NA	0.1099	3	NA	NA
3	58419529	PDHB	0.0988693	0.81	1	NA	NA	NA	NA	0.02489	4	NA	NA
14	96848757	C14orf129	0.09887	NA	NA	NA	NA	NA	NA	0.09887	2	NA	NA
20	48124462	PTGIS	0.0989552	0.7447	8	0.1344	8	0.01769	10	0.3931	15	0.4763	12
3	48360992	SPINK8	0.0989574	0.03637	1	0.5865	1	NA	NA	0.2254	1	NA	NA
10	101544428	ABCC2	0.0990038	0.6806	22	0.03508	22	0.3224	14	0.8084	27	0.05332	21
9	32457245	DDX58	0.0990399	0.9705	3	0.3732	2	0.0742	4	0.2741	8	0.04507	4
2	71730441	DYSF	0.0990511	0.3009	36	0.004384	24	0.3084	29	0.9164	54	0.8907	21
19	40885598	HIPK4	0.0993092	0.1025	6	0.6635	4	0.06871	6	0.956	13	0.07467	6
2	127447840	GYPC	0.0993333	0.6879	6	0.9114	6	NA	NA	0.007711	6	NA	NA
2	42994787	HAAO	0.0994032	0.1386	3	0.0767	4	0.192	2	0.6089	4	NA	NA
6	121768449	GJA1	0.0995236	0.4554	1	0.9341	16	0.4183	2	0.006998	2	NA	NA
3	9959166	IL17RC	0.0995823	0.1693	9	0.7282	6	0.7168	7	0.02947	16	0.1287	10
10	50824106	CHAT	0.0996213	0.5269	14	0.1714	11	0.4862	6	0.03362	15	0.2272	5
1	55541174	USP24	0.0996858	0.2987	5	0.6652	6	0.6651	9	0.1959	16	0.01297	7
7	23224734	NUPL2	0.0997233	0.4429	8	0.04533	2	0.5906	4	0.7343	7	0.03859	6
19	48619154	LIG1	0.0997397	0.8302	10	0.8072	5	0.001124	4	0.9991	11	0.4466	5
20	32341041	ZNF341	0.0997799	0.7636	8	0.1528	3	0.1865	7	0.2523	14	0.06126	5
5	175798736	ARL10	0.0998043	0.01825	2	0.6234	2	0.8455	1	0.4594	4	0.07614	2
1	150938638	CERS2	0.099809	0.2067	3	0.1931	1	0.1478	5	0.4034	3	0.1414	3
6	44222718	SLC35B2	0.0998174	0.6966	4	0.5054	1	0.5997	3	0.05869	7	0.02716	4
12	53459632	SPRYD3	0.09989	0.09989	2	NA	NA	NA	NA	NA	NA	NA	NA
1	180885430	KIAA1614	0.099939	0.08712	13	0.06741	6	0.4424	11	0.5468	20	0.2374	8
12	22208133	CMAS	0.10003	0.05469	2	0.9588	1	0.02634	1	0.6788	2	0.3603	2
2	16085885	MYCN	0.100116	0.3578	2	NA	NA	NA	NA	0.01416	2	0.9651	1
3	15677019	BTD	0.100189	0.3204	5	0.4621	14	0.03614	8	0.2661	13	0.2379	7
22	36892103	FOXRED2	0.100189	0.4521	6	0.408	4	0.165	9	0.01334	14	0.8343	6
2	157427698	GPD2	0.100386	0.3603	3	0.2892	2	0.2148	7	0.02215	10	0.6856	5
15	75310308	SCAMP5	0.1004	NA	NA	NA	NA	NA	NA	0.1004	2	NA	NA
22	45127628	PRR5-ARHGAP8	0.100483	0.361	23	0.5314	17	0.1986	23	0.05332	31	0.1676	22
10	116196048	ABLIM1	0.100506	0.07002	8	0.8805	4	0.9262	9	0.008554	18	0.6973	7
14	31542174	AP4S1	0.100533	0.1074	4	NA	NA	0.3247	3	0.04658	4	0.7791	3
6	26033506	HIST1H2AB	0.101	NA	NA	0.101	1	NA	NA	NA	NA	NA	NA
2	196571445	SLC39A10	0.101002	0.4875	1	NA	NA	NA	NA	0.04248	5	NA	NA
6	31083813	CDSN	0.101064	0.04672	8	0.3218	6	0.3521	4	0.2067	5	0.3143	4
5	169015433	CCDC99	0.101085	0.139	5	0.4994	10	0.03475	13	0.1544	16	0.9237	12
3	37323711	GOLGA4	0.101239	0.05826	18	0.2991	9	0.1812	14	0.7848	22	0.1392	11
17	79163758	AZI1	0.101429	0.7071	13	0.2169	6	0.1623	16	0.2856	22	0.04868	17
5	6753064	PAPD7	0.101668	0.02929	1	0.7441	2	NA	NA	0.2294	2	NA	NA
1	197890684	LHX9	0.101674	0.9123	2	NA	NA	NA	NA	0.02289	2	NA	NA
16	30762587	PHKG2	0.101677	0.1224	2	0.09013	5	0.6226	4	0.08009	5	0.6318	3
19	756954	C19orf21	0.101847	0.6717	15	0.7459	3	0.298	10	0.01316	15	0.1774	7
8	110587148	SYBU	0.10193	0.9645	3	0.532	4	0.006046	3	0.2395	9	0.4698	2
4	167656090	SPOCK3	0.101949	0.6393	7	0.1977	1	0.02811	2	0.1146	3	0.8576	4
11	62564009	NXF1	0.102037	NA	NA	0.6119	1	0.04623	3	0.1674	3	0.2737	2
7	5521468	FBXL18	0.102311	NA	NA	0.2293	1	0.5696	2	0.01296	3	0.769	2
1	159888645	TAGLN2	0.102325	0.5055	2	0.06852	1	NA	NA	0.1457	3	NA	NA
22	32756358	RFPL3	0.102465	0.08276	2	0.2548	4	NA	NA	NA	NA	NA	NA
13	46541673	ZC3H13	0.102575	0.05966	3	0.2448	8	0.9428	10	0.1609	20	0.1593	10
5	140579358	PCDHB11	0.102639	0.7055	2	0.1478	5	0.01145	4	0.8112	7	0.3648	4
20	60856154	OSBPL2	0.102673	0.2852	1	NA	NA	0.1097	2	0.1621	5	NA	NA
10	103990230	PITX3	0.1027	NA	NA	0.1027	1	NA	NA	NA	NA	NA	NA
5	175992396	CDHR2	0.102777	0.3614	24	0.9206	9	0.007386	17	0.1803	29	0.7993	14
5	138723741	RP11-1280I22.1	0.102842	0.07548	3	0.1423	2	NA	NA	0.4733	2	NA	NA
15	36936489	C15orf41	0.102845	0.3545	2	0.07343	1	NA	NA	0.1953	2	NA	NA
3	124515454	ITGB5	0.102882	0.08762	8	0.1171	3	0.1164	10	0.554	10	0.5362	4
19	16268287	HSH2D	0.103005	0.2972	1	0.5005	3	0.6381	1	0.2215	3	0.01691	1
3	9854630	ARPC4-TTLL3	0.103056	0.7186	10	0.01541	2	0.1308	11	0.4358	15	0.5637	11
1	150551327	MCL1	0.103091	0.4385	2	0.01517	2	0.2236	1	0.8859	6	NA	NA
3	54952644	LRTM1	0.103122	0.2953	5	0.8596	3	0.2155	2	0.0241	6	NA	NA
14	55903280	TBPL2	0.103172	NA	NA	0.02265	3	NA	NA	0.9391	3	NA	NA
6	130425617	RP11-73O6.4	0.103213	0.1508	2	NA	NA	NA	NA	0.04817	4	0.7035	3
19	36394678	HCST	0.103248	NA	NA	NA	NA	0.3918	2	0.05434	2	NA	NA
11	66114865	B3GNT1	0.1033	0.1033	1	NA	NA	NA	NA	NA	NA	NA	NA
3	36871124	TRANK1	0.103492	0.9831	17	0.4779	6	0.01756	9	0.2099	23	0.207	17
2	162061198	TANK	0.103508	0.2552	6	0.8347	3	0.01822	6	0.2781	8	0.3322	6
1	166892001	ILDR2	0.103574	0.441	3	NA	NA	NA	NA	0.04847	3	NA	NA
15	65676726	IGDCC4	0.103585	0.09825	10	0.7087	7	0.07117	15	0.1004	19	0.7216	11
20	62328205	TNFRSF6B	0.103678	0.03678	5	NA	NA	NA	NA	0.5819	3	NA	NA
1	35223025	GJB5	0.103688	0.4953	6	0.4759	2	0.03031	4	0.3254	6	0.1547	2
5	121413205	LOX	0.103734	NA	NA	NA	NA	0.1723	1	NA	NA	0.1243	1
13	25743748	FAM123A	0.103751	0.885	4	0.8601	4	0.09832	6	0.3821	9	0.01259	4
2	74754170	AUP1	0.103806	0.5225	2	0.04998	1	0.04054	4	0.977	5	0.3484	4
18	685940	ENOSF1	0.10384	0.00626	3	0.9671	5	0.2577	2	0.8545	5	NA	NA
15	101464887	LRRK1	0.103937	0.5845	13	0.7937	11	0.2227	14	0.02001	33	0.1747	15
16	2946541	FLYWCH2	0.104	NA	NA	0.104	1	NA	NA	NA	NA	NA	NA
3	121151264	POLQ	0.104057	0.2463	22	0.3175	13	0.02462	20	0.3635	40	0.5171	16
12	111088061	HVCN1	0.10411	NA	NA	0.1512	1	0.07248	3	0.4722	2	NA	NA
1	48694594	SLC5A9	0.104159	0.7421	7	0.2241	6	0.7359	11	0.2506	13	0.01182	6
12	49491493	LMBR1L	0.104208	0.5666	4	0.6904	3	0.168	2	0.04503	4	0.1226	2
13	25876011	NUPL1	0.104241	0.5289	4	0.9713	2	0.3707	2	0.03907	4	0.04879	2
14	50732098	L2HGDH	0.10428	0.04733	4	0.2788	2	0.3309	2	0.3074	3	NA	NA
16	3100033	MMP25	0.104301	0.652	3	0.04835	3	0.1587	7	0.1372	9	0.5294	5
19	3959299	DAPK3	0.104388	0.33	1	NA	NA	0.7728	3	0.02061	5	0.2558	3
1	168154019	TIPRL	0.1044	NA	NA	NA	NA	NA	NA	0.1044	1	NA	NA
10	94594565	EXOC6	0.104413	0.8445	6	0.09164	8	0.05318	6	0.2076	10	0.4261	7
5	150696419	SLC36A2	0.104414	0.1422	7	0.4163	4	0.1941	6	0.2301	8	0.1377	7
3	169639114	SAMD7	0.104438	0.07854	4	NA	NA	0.08603	2	0.3834	3	0.5194	3
19	44831989	ZFP112	0.104447	0.8013	1	0.9061	2	0.208	2	0.004163	7	0.5794	1
10	75549297	KIAA0913	0.104455	0.07662	4	0.4616	4	0.1737	6	0.1595	5	0.3718	5
13	32977099	N4BP2L1	0.104474	NA	NA	0.1561	1	0.08803	1	0.3785	1	NA	NA
19	10505719	CDC37	0.104536	NA	NA	NA	NA	0.1355	1	0.1596	3	NA	NA
8	23106860	CHMP7	0.104621	0.9621	5	0.08325	1	NA	NA	0.06507	3	NA	NA
6	2890543	SERPINB9	0.104657	0.9238	2	0.07425	2	0.01464	5	0.7414	7	0.491	5
1	108138962	VAV3	0.104702	0.1163	9	0.5336	4	0.5873	7	0.07793	12	0.1288	9
22	32756793	RFPL3-AS1	0.104813	0.04312	1	0.5032	1	NA	NA	NA	NA	NA	NA
16	88931274	PABPN1L	0.104816	0.2605	5	0.6166	4	0.04428	4	0.1548	5	0.3329	3
7	23293854	GPNMB	0.104999	0.7238	11	0.8204	6	0.2978	8	0.5522	15	0.003765	9
7	129710488	KLHDC10	0.105	0.105	1	NA	NA	NA	NA	NA	NA	NA	NA
4	1801001	FGFR3	0.105018	0.1196	7	0.2493	23	0.7918	2	0.8434	2	0.01847	3
9	114986453	PTBP3	0.105137	0.01962	3	NA	NA	0.8206	4	0.1487	5	0.5681	3
9	710818	KANK1	0.105139	0.002006	18	0.4531	16	0.8984	19	0.6961	32	0.6483	16
12	132466836	EP400	0.105164	0.009751	16	0.4785	12	0.1662	17	0.4825	34	0.9853	17
7	1785738	ELFN1	0.1052	NA	NA	0.1052	3	NA	NA	NA	NA	NA	NA
15	45409961	DUOXA1	0.105251	0.2542	6	0.01907	1	0.1583	5	0.6727	10	0.7152	2
1	197871863	C1orf53	0.105358	NA	NA	0.1202	2	NA	NA	0.1817	2	NA	NA
7	141478305	TAS2R4	0.105431	0.0371	1	0.8093	2	0.1283	3	0.2006	4	0.4792	3
6	110501805	CDC40	0.105464	0.4499	2	NA	NA	NA	NA	0.04279	1	0.2739	1
18	22775185	ZNF521	0.105475	NA	NA	0.1203	4	0.3093	7	0.1943	11	0.1891	4
9	21385319	IFNA2	0.105492	0.07749	1	NA	NA	NA	NA	0.2823	5	NA	NA
2	95537770	TEKT4	0.105554	0.2062	2	0.1431	5	0.4428	5	0.1265	11	0.2245	4
15	72699549	TMEM202	0.105577	0.5531	1	0.1135	4	0.08195	5	0.09837	7	0.7335	5
12	110841379	ANAPC7	0.105781	0.4075	2	0.04233	3	0.9876	2	0.2004	5	0.1091	3
2	203155896	NOP58	0.105947	NA	NA	0.2229	3	0.5541	3	0.1359	3	0.08204	1
10	121086097	GRK5	0.106145	0.0447	5	0.262	2	0.1592	3	0.7408	5	NA	NA
7	55229255	EGFR	0.106289	0.6465	2	0.8675	2	0.8823	5	0.001591	10	0.4771	2
4	5448429	STK32B	0.106344	0.1031	4	0.3916	3	NA	NA	0.05698	5	0.6022	2
7	30791848	INMT-FAM188B	0.106355	0.5185	2	0.5188	4	0.8534	4	0.01598	5	0.1025	6
7	137076015	DGKI	0.106435	0.2302	6	0.0816	2	0.3358	3	0.1132	7	0.5273	4
3	131100956	NUDT16	0.106477	NA	NA	0.4627	2	0.195	3	0.08051	5	0.1911	3
12	81471954	ACSS3	0.106615	0.6612	5	0.01742	3	0.3124	1	0.3866	3	NA	NA
16	31102557	VKORC1	0.10663	0.8284	2	0.01995	3	NA	NA	0.3242	1	NA	NA
17	45360730	ITGB3	0.106651	0.07978	5	0.4739	11	0.03817	5	0.5091	7	0.5143	3
15	38988815	C15orf53	0.106757	NA	NA	0.3172	2	NA	NA	0.07001	2	NA	NA
3	42555244	VIPR1	0.106761	0.09536	7	0.01051	3	0.574	4	0.7036	7	0.9352	5
17	56283519	MKS1	0.106778	0.0933	6	0.2339	6	0.06504	8	0.7814	12	0.3414	8
6	151626933	AKAP12	0.106814	0.02633	21	0.8256	12	0.4939	14	0.6819	30	0.05175	20
4	22737768	GBA3	0.106849	0.2876	6	NA	NA	0.3698	6	0.02059	9	0.6375	7
1	85733374	BCL10	0.106892	0.02869	1	NA	NA	NA	NA	0.4279	3	0.438	1
1	12711227	AADACL4	0.107079	0.7854	4	0.3131	5	0.2741	3	0.05718	3	0.09873	2
2	111551708	ACOXL	0.10713	0.1857	10	0.1024	11	0.2913	6	0.4335	9	0.1586	4
19	17471634	PLVAP	0.107156	0.2181	7	0.02389	2	0.2376	2	0.7835	3	0.3928	3
2	1637992	PXDN	0.107399	0.01437	8	0.4774	5	0.5887	7	0.1607	13	0.5894	7
2	38177738	FAM82A1	0.107404	0.3195	12	0.4417	4	0.0576	6	0.08413	9	0.5594	8
2	88472791	THNSL2	0.107507	0.04919	11	0.8759	3	0.9587	4	0.05842	12	0.1588	5
3	32398997	CMTM8	0.107572	0.1103	2	0.4204	1	0.9944	2	0.1406	5	0.05917	3
5	156769905	FNDC9	0.107642	0.5107	6	0.3746	3	0.7088	5	0.04366	11	0.06487	5
3	158428602	RARRES1	0.107649	NA	NA	0.5105	1	NA	NA	0.04396	3	NA	NA
2	111415139	BUB1	0.107674	0.3306	3	0.06474	1	0.6073	1	0.06322	5	0.4676	1
19	56001665	SSC5D	0.10772	0.481	4	0.4792	2	0.03998	6	0.1949	10	0.2141	7
16	3254418	OR1F1	0.107742	0.6331	5	0.9057	3	0.2002	2	0.5359	6	0.006253	2
1	247464150	ZNF496	0.107774	0.1199	5	NA	NA	0.4476	3	0.1014	6	NA	NA
6	74440151	CD109	0.107856	0.1225	23	0.2733	15	0.3889	17	0.03163	26	0.9358	12
19	2476388	GADD45B	0.1079	NA	NA	NA	NA	NA	NA	0.1079	1	NA	NA
1	7907918	UTS2	0.107944	NA	NA	0.372	1	0.01496	2	0.9801	3	NA	NA
11	116706664	APOA1	0.108015	NA	NA	0.4725	3	0.02352	2	0.2893	3	0.4419	3
1	158261071	CD1C	0.108017	0.1214	3	0.03375	3	0.6747	5	0.7168	8	0.195	3
20	44259622	WFDC10A	0.1081	0.1081	1	NA	NA	NA	NA	NA	NA	NA	NA
21	30698758	BACH1	0.108115	0.8	3	0.01728	3	0.5313	3	0.2077	8	0.2537	2
1	183852914	RGL1	0.108169	0.3671	2	0.1822	2	0.2022	2	0.161	5	0.1779	2
6	31583312	AIF1	0.108243	0.3762	1	NA	NA	NA	NA	0.06007	2	NA	NA
16	15131962	NTAN1	0.108334	0.7683	2	0.7376	1	0.3582	3	0.6646	4	0.002879	1
4	1643204	FAM53A	0.108444	0.07818	8	0.5643	2	0.02511	4	0.3867	6	0.9083	5
6	36645696	CDKN1A	0.108583	NA	NA	0.07652	1	0.5716	1	0.4358	3	0.07517	1
10	20106075	PLXDC2	0.108647	0.2436	4	0.3956	2	0.2046	3	0.03843	5	0.5152	2
[truncated: 14,527 more rows]

[truncated: 2 more sheets: STable11, STable12]
