# Supplementary material for: Rare variant analyses across multiethnic cohorts identify novel genes for refractive error
Source: Research Square preprint supplement (doi:10.21203/rs.3.rs-846265/v1), 2021-09-03
Supplement: Supplementary file 2 [file 51901684d92adaccc69cad29.xlsx]

## Sheet: STable27
Supplementary Table 27: Upstream Regulators of the Seven Top Prioritized Genes
Upstream Regulator	Molecule Type	p-value of overlap	Target Molecules in Dataset
Dst	other	0.000625	MAPT
NAGLU	enzyme	0.000625	MAPT
SRPK2	kinase	0.000938	MAPT
SYNPO	other	0.000938	MAPT
NKX2-1	transcription regulator	0.00142	GRHL2,MAPT
IgG2b	complex	0.00156	MAPT
LGMN	peptidase	0.00156	MAPT
ELAVL4	translation regulator	0.00156	MAPT
HSPA8	enzyme	0.0025	MAPT
AGRN	other	0.00281	MAPT
VAMP8	transporter	0.00281	MAPT
STOX1	other	0.00437	MAPT
PER2	transcription regulator	0.00468	PER3
ARG1	enzyme	0.0053	MAPT
Endothelin	group	0.00561	MAPT
CDK5R1	kinase	0.00593	MAPT
PSEN1	peptidase	0.00621	MAPT,PER3
CAST	peptidase	0.00624	MAPT
PER1	transcription regulator	0.00655	PER3
SIRT1	transcription regulator	0.00741	MAPT,PDCD6IP
BAG1	other	0.0081	MAPT
RNF181	enzyme	0.00965	GRHL2
mir-193	microRNA	0.00996	MAPT
MARK2	kinase	0.0103	MAPT
Laminin (complex)	complex	0.0134	MAPT
RPS6KB1	kinase	0.0134	MAPT
GBX2	transcription regulator	0.0134	USH2A
SRSF2	transcription regulator	0.0134	MAPT
Hsp27	group	0.0149	MAPT
FYN	kinase	0.0149	MAPT
Hsp70	group	0.0155	MAPT
LAS1L	other	0.0189	CHST6
STUB1	enzyme	0.0189	MAPT
ARNTL	transcription regulator	0.0208	PER3
PRNP	other	0.0241	PDCD6IP
TPH1	enzyme	0.0254	MAPT
FBXO32	enzyme	0.026	MAPT
TAC1	other	0.0275	MAPT
DSCAML1	other	0.0278	MAPT
ZEB1	transcription regulator	0.0287	GRHL2
DSCAM	other	0.0293	MAPT
ATG7	enzyme	0.0302	PDCD6IP
CYP1A1	enzyme	0.0305	MAPT
MKNK1	kinase	0.0315	MAPT
KAT5	transcription regulator	0.0339	MAPT
SYK	kinase	0.0354	MAPT
LIPE	enzyme	0.0387	MAPT
HMOX1	enzyme	0.039	MAPT
IL1B	cytokine	0.04	CHST6,MAPT
SP110	transcription regulator	0.0433	PDCD6IP
RET	kinase	0.0454	PER3
GFI1	transcription regulator	0.0463	PER3

## Sheet: STable28
Supplementary Table 28: Causal Network Analysis of Seven Top Prioritized Genes
Master Regulator	Molecule Type	Participating regulators	Depth	p-value of overlap	Network bias-corrected p-value	Target Molecules in Dataset	Causal network	Target-connected regulators
STOX1	other	STOX1	1	0.000625	0.0027	MAPT	1 (1)	1
SRPK2	kinase	SRPK2	1	0.000625	0.0019	MAPT	1 (1)	1
SYNPO	other	SYNPO	1	0.000625	0.0019	MAPT	1 (1)	1
NAGLU	enzyme	NAGLU	1	0.000625	0.0034	MAPT	1 (1)	1
IgG2b	complex	IgG2b	1	0.00156	0.0019	MAPT	1 (1)	1
LGMN	peptidase	LGMN	1	0.00156	0.0019	MAPT	1 (1)	1
ELAVL4	translation regulator	ELAVL4	1	0.00156	0.0031	MAPT	1 (1)	1
MIF	cytokine	dexamethasone,ERK1/2,MIF,PRKCD,SYK,TP53	2	0.00163	0.0015	GRHL2,MAPT,P4HTM,PDCD6IP,PER3	5 (6)	5
AGRN	other	AGRN	1	0.0025	0.0056	MAPT	1 (1)	1
mir-130	microRNA	estrogen receptor,IL1B,MET,mir-130,NFkB (complex),PRKCD,RET,TP53	3	0.00258	0.0024	CHST6,GRHL2,MAPT,PDCD6IP,PER3	5 (8)	5
PTGIS	enzyme	CASP3,ERK1/2,estrogen receptor,IL1B,NFkB (complex),PPARD,PRKCD,PTGIS,SIRT1,TP53	3	0.00276	0.0021	CHST6,GRHL2,MAPT,PDCD6IP,PER3	5 (10)	7
VAMP8	transporter	VAMP8	1	0.00281	0.0095	MAPT	1 (1)	1
PER2	transcription regulator	PER2	1	0.00312	0.005	PER3	1 (1)	1
MAGT1	enzyme	MAGT1,PRKCD,SYK	2	0.00332	0.0035	GRHL2,MAPT	2 (3)	2
Convulxin	complex	Convulxin,PRKCD,SYK	2	0.00359	0.0033	GRHL2,MAPT	2 (3)	2
CLOCK	transcription regulator	CLOCK,ERK1/2,estrogen receptor,ICAM1,IL1B,NFkB (complex),PRKCD,TP53	3	0.00385	0.0037	CHST6,GRHL2,MAPT,PDCD6IP,PER3	5 (8)	6
PER1	transcription regulator	PER1	1	0.00437	0.005	PER3	1 (1)	1
SIRT1	transcription regulator	SIRT1	1	0.00475	0.0037	MAPT,PDCD6IP	2 (1)	1
Endothelin	group	Endothelin	1	0.00499	0.0052	MAPT	1 (1)	1
ARG1	enzyme	ARG1	1	0.00499	0.0061	MAPT	1 (1)	1
EFNB2	kinase	CASP8,EFNB2,ERK1/2,IL1B,Jnk,mir-21,STAT3,TP53,TP63	3	0.00508	0.0113	CHST6,GRHL2,MAPT,PDCD6IP,PER3	5 (9)	5
CDK5R1	kinase	CDK5R1	1	0.0053	0.0021	MAPT	1 (1)	1
CASP12	peptidase	CASP1,CASP12,CASP3,IL1B,PRKCD,TP53	3	0.00535	0.0049	CHST6,GRHL2,MAPT,PDCD6IP	4 (6)	3
BAG1	other	BAG1	1	0.00561	0.0067	MAPT	1 (1)	1
CAST	peptidase	CAST	1	0.00561	0.0045	MAPT	1 (1)	1
P2rx7	ion channel	ERK1/2,P2rx7,PRKCD	2	0.00633	0.0053	GRHL2,MAPT	2 (3)	2
RGN	enzyme	APP,CASP8,ERK1/2,ESR1,IL1B,MAPK14,MTOR,Nos,Pkc(s),PRKCD,protein phosphatase,PSEN1,RGN,TP53	3	0.00646	0.0075	CHST6,GRHL2,MAPT,PDCD6IP,PER3	5 (14)	9
SMPD2	enzyme	ERK1/2,GSK3B,IL1B,NFkB (complex),PRKCD,PSEN1,SMPD2,TP53	3	0.00779	0.0147	CHST6,GRHL2,MAPT,PDCD6IP,PER3	5 (8)	5
IFN Beta	group	IFN Beta,IL1B,PRKCD,TP53	2	0.00783	0.0101	CHST6,GRHL2,MAPT,PDCD6IP	4 (4)	3
SRSF2	transcription regulator	SRSF2	1	0.0081	0.0118	MAPT	1 (1)	1
AEBP1	peptidase	AEBP1,ARNTL,ERK1/2,IL1B,Mapk,NFkB (complex),PRKCD,SMAD3,TGFB1	3	0.00837	0.0144	CHST6,GRHL2,MAPT,PER3	4 (9)	5
TACR1	G-protein coupled receptor	ERK1/2,PRKCD,TACR1	2	0.00918	0.0073	GRHL2,MAPT	2 (3)	2
RNF181	enzyme	RNF181	1	0.00965	0.011	GRHL2	1 (1)	1
mir-193	microRNA	mir-193	1	0.00965	0.0116	MAPT	1 (1)	1
MYO1E	enzyme	ERK1/2,estrogen receptor,Focal adhesion kinase,IL1B,MYO1E,NFkB (complex),PRKCD,RET	3	0.00996	0.0124	CHST6,GRHL2,MAPT,PER3	4 (8)	5
Laminin (complex)	complex	Laminin (complex)	1	0.0103	0.0111	MAPT	1 (1)	1
ADRB3	G-protein coupled receptor	ADRB3,ARNTL,ERK1/2,Mapk,P38 MAPK,PI3K (complex),PRKCD,TP53,TP63	3	0.0104	0.021	GRHL2,MAPT,PDCD6IP,PER3	4 (9)	5
TOLLIP	other	ERK1/2,IL1,IL1B,NFkB (complex),norepinephrine,PRKCD,SMAD2,TGFB1,TOLLIP,TP53	3	0.0105	0.0224	CHST6,GRHL2,MAPT,PDCD6IP,USH2A	5 (10)	6
ERBB4 ligand	group	BTC,DCN,ERBB4,ERBB4 ligand,EREG,ERK1/2,estrogen receptor,HBEGF,MAPK14,MTOR,NRG1,NRG2,NRG3,PSEN1,RPS6KB1,TGFB1,TMEFF2,TP53	3	0.0108	0.0163	GRHL2,MAPT,PDCD6IP,PER3	4 (18)	8
PKR dimer	complex	ATF3,ERK1/2,IL1B,Inflammasome,mir-21,PKR dimer,STAT3,TP53,TP63	3	0.0115	0.0209	CHST6,GRHL2,MAPT,PDCD6IP,PER3	5 (9)	5
Hsp27	group	Hsp27	1	0.0121	0.0138	MAPT	1 (1)	1
RPA	complex	HSF1,POLH,PRKCD,RPA,RPA1,TP53,WRN	3	0.0126	0.0151	GRHL2,MAPT,PDCD6IP	3 (7)	3
FYN	kinase	FYN	1	0.0127	0.0125	MAPT	1 (1)	1
RPS6KB1	kinase	RPS6KB1	1	0.0131	0.011	MAPT	1 (1)	1
NFIC	transcription regulator	CASP3,CASP8,CDKN1A,EP300,ERK1/2,IL1B,NFIC,PRKCD,TP53	3	0.0138	0.0183	CHST6,GRHL2,MAPT,PDCD6IP	4 (9)	5
GFRA2	transmembrane receptor	ERK1/2,GFRA2,RET	2	0.0139	0.0103	MAPT,PER3	2 (3)	2
RASD1	enzyme	ERK1/2,PRKCD,RASD1	2	0.0167	0.017	GRHL2,MAPT	2 (3)	2
mir-124	microRNA	ERK1/2,mir-124,mir-21,NFATC2,STAT3,TP53,TP63	3	0.0173	0.0245	GRHL2,MAPT,PDCD6IP,PER3	4 (7)	4
SFTPC	other	CASP3,CASP4,IL1B,PRKCD,SFTPC	3	0.0174	0.0203	CHST6,GRHL2,MAPT	3 (5)	2
LAS1L	other	LAS1L	1	0.0189	0.0249	CHST6	1 (1)	1
Calcineurin B	group	Calcineurin B,ERK1/2,PRKCD	2	0.019	0.0154	GRHL2,MAPT	2 (3)	2
ARNTL	transcription regulator	ARNTL	1	0.0192	0.0264	PER3	1 (1)	1
BLM	enzyme	BLM,HSF1,PRKCD,RPA1,TOP1,TP53,WRN	3	0.0192	0.0283	GRHL2,MAPT,PDCD6IP	3 (7)	3
NFkB (complex)	complex	estrogen receptor,IL1B,NFkB (complex),PRKCD,TP53	2	0.0194	0.0236	CHST6,GRHL2,MAPT,PDCD6IP	4 (5)	4
Cr3	complex	Cr3,PRKCD,SYK	2	0.0196	0.0182	GRHL2,MAPT	2 (3)	2
ZDHHC7	enzyme	Creb,ERK1/2,mir-21,STAT3,TP53,TP63,ZDHHC7	3	0.0198	0.0283	GRHL2,MAPT,PDCD6IP,PER3	4 (7)	4
SLC39A4	transporter	Creb,ERK1/2,mir-21,SLC39A4,STAT3,TP53,TP63	3	0.0198	0.0283	GRHL2,MAPT,PDCD6IP,PER3	4 (7)	4
NGF	growth factor	APP,EP300,ERK1/2,MAPK14,NGF,PRKCD,RET,TP53	2	0.0211	0.027	GRHL2,MAPT,PDCD6IP,PER3	4 (8)	7
ZEB1	transcription regulator	ZEB1	1	0.0238	0.0373	GRHL2	1 (1)	1
FAIM2	other	CASP3,CASP8,ERK1/2,FAIM2,IL1B,PRKCD	3	0.024	0.032	CHST6,GRHL2,MAPT	3 (6)	3
ZNF385B	other	CASP3,CASP8,ERK1/2,IL1B,PRKCD,ZNF385B	3	0.024	0.032	CHST6,GRHL2,MAPT	3 (6)	3
EMILIN2	other	CASP3,CASP8,EMILIN2,ERK1/2,IL1B,PRKCD	3	0.024	0.032	CHST6,GRHL2,MAPT	3 (6)	3
SGMS1	enzyme	CASP3,CASP8,ERK1/2,IL1B,PRKCD,SGMS1	3	0.0241	0.032	CHST6,GRHL2,MAPT	3 (6)	3
EBAG9	other	CASP3,CASP8,EBAG9,ERK1/2,IL1B,PRKCD	3	0.0242	0.0322	CHST6,GRHL2,MAPT	3 (6)	3
MGAT3	enzyme	ERK1/2,MGAT3,PRKCD	2	0.0244	0.0267	GRHL2,MAPT	2 (3)	2
AIFM1	enzyme	AIFM1,CASP3,CASP8,ERK1/2,IL1B,PRKCD	3	0.0245	0.0326	CHST6,GRHL2,MAPT	3 (6)	3
TAC1	other	TAC1	1	0.0247	0.0205	MAPT	1 (1)	1
SULF1	enzyme	ERK1/2,RET,SULF1	2	0.0247	0.0223	MAPT,PER3	2 (3)	2
APOL6	transporter	APOL6,CASP3,CASP8,ERK1/2,IL1B,PRKCD	3	0.0249	0.0341	CHST6,GRHL2,MAPT	3 (6)	3
HYAL1	enzyme	CASP3,CASP8,ERK1/2,HYAL1,IL1B,PRKCD	3	0.025	0.0341	CHST6,GRHL2,MAPT	3 (6)	3
KCNJ6	ion channel	CASP3,CASP8,ERK1/2,IL1B,KCNJ6,PRKCD	3	0.025	0.0341	CHST6,GRHL2,MAPT	3 (6)	3
HOXA-AS2	other	CASP3,CASP8,ERK1/2,HOXA-AS2,IL1B,PRKCD	3	0.0251	0.0343	CHST6,GRHL2,MAPT	3 (6)	3
TPH1	enzyme	TPH1	1	0.0254	0.0411	MAPT	1 (1)	1
HMGA1	transcription regulator	HMGA1,TP53,TP63	2	0.0254	0.0345	GRHL2,MAPT,PDCD6IP	3 (3)	3
Focal adhesion kinase	group	ERK1/2,Focal adhesion kinase,RET,TP53	2	0.0259	0.0357	MAPT,PDCD6IP,PER3	3 (4)	3
KAT5	transcription regulator	KAT5	1	0.026	0.0267	MAPT	1 (1)	1
FBXO32	enzyme	FBXO32	1	0.026	0.0275	MAPT	1 (1)	1
HYPK	other	CASP3,CASP8,ERK1/2,HYPK,IL1B,PRKCD	3	0.0263	0.0344	CHST6,GRHL2,MAPT	3 (6)	3
Caspase 8/10	group	CASP3,CASP8,Caspase 8/10,ERK1/2,IL1B,PRKCD	3	0.0268	0.0341	CHST6,GRHL2,MAPT	3 (6)	3
APAF1	other	APAF1,CASP3,CASP8,caspase,ERK1/2,IL1B,PRKCD	3	0.027	0.036	CHST6,GRHL2,MAPT	3 (7)	3
BIRC6	enzyme	BIRC6,CASP3,CASP8,caspase,ERK1/2,IL1B,PRKCD	3	0.0275	0.0353	CHST6,GRHL2,MAPT	3 (7)	3
CAPN2	peptidase	CAPN2,CASP3,CASP8,ERK1/2,IL1B,PRKCD	3	0.0275	0.0386	CHST6,GRHL2,MAPT	3 (6)	3
SATB1	transcription regulator	CASP3,CASP8,ERK1/2,IL1B,PRKCD,SATB1	3	0.0276	0.0363	CHST6,GRHL2,MAPT	3 (6)	3
DSCAML1	other	DSCAML1	1	0.0278	0.0407	MAPT	1 (1)	1
PSEN1	peptidase	ERK1/2,PSEN1,TP53	2	0.0283	0.0397	MAPT,PDCD6IP,PER3	3 (3)	3
ATG7	enzyme	ATG7	1	0.029	0.031	PDCD6IP	1 (1)	1
DSCAM	other	DSCAM	1	0.029	0.0476	MAPT	1 (1)	1
HIPK2	kinase	EP300,HIPK2,HMGA1,TP53,TP63	2	0.0314	0.044	GRHL2,MAPT,PDCD6IP	3 (5)	4
MKNK1	kinase	MKNK1	1	0.0315	0.0385	MAPT	1 (1)	1
RET	kinase	RET	1	0.0318	0.0346	PER3	1 (1)	1
Nos	group	ERK1/2,Nos,PRKCD	2	0.0321	0.0373	GRHL2,MAPT	2 (3)	2
IL1B	cytokine	IL1B	1	0.0323	0.0308	CHST6,MAPT	2 (1)	1
CD79A	transmembrane receptor	CD79A,MAPK14,PRKCD,SYK	2	0.0337	0.0436	GRHL2,MAPT	2 (4)	3
FTO	enzyme	FTO,MTOR,PRKCD	2	0.0338	0.0393	GRHL2,MAPT	2 (3)	2
NGFR	transmembrane receptor	APP,NGFR,PRKCD,TP53	2	0.0339	0.0466	GRHL2,MAPT,PDCD6IP	3 (4)	3
PDGF-AA	complex	ERK1/2,PDGF-AA,PRKCD	2	0.0341	0.0374	GRHL2,MAPT	2 (3)	2
SYK	kinase	SYK	1	0.0342	0.0336	MAPT	1 (1)	1
Pkc(s)	group	APP,ERK1/2,MAPK14,MTOR,Pkc(s),PRKCD,PSEN1,TP53	2	0.0343	0.0474	GRHL2,MAPT,PDCD6IP,PER3	4 (8)	7
HMOX1	enzyme	HMOX1	1	0.0348	0.0399	MAPT	1 (1)	1
AKR1B1	enzyme	AKR1B1,ERK1/2,PPARD,TP53	2	0.0363	0.0434	MAPT,PDCD6IP,PER3	3 (4)	3
CLOCK	transcription regulator	CLOCK	1	0.0378	0.05	PER3	1 (1)	1
MAPK14	kinase	MAPK14	1	0.0552	0.0429	MAPT	1 (1)	1
CD79A	transmembrane receptor	CD79A,MAPK14,PRKCD,SYK	2	0.0241	0.0414	GRHL2,MAPT	2 (4)	3
FTO	enzyme	FTO,MTOR,PRKCD	2	0.0247	0.0413	GRHL2,MAPT	2 (3)	2
CCS-Cu2+	complex	APP,CCS-Cu2+,copper,Cu2+,ERK1/2,RET,SOD1,TP53	3	0.025	0.0439	MAPT,PDCD6IP,PER3	3 (8)	4
DSCAM	other	DSCAM	1	0.025	0.0496	MAPT	1 (1)	1
PDGF-AA	complex	ERK1/2,PDGF-AA,PRKCD	2	0.0256	0.0377	GRHL2,MAPT	2 (3)	2
NUPR1	transcription regulator	EP300,NUPR1	2	0.0267	0.0331	MAPT,PER3	2 (2)	2
MKNK1	kinase	MKNK1	1	0.0271	0.0358	MAPT	1 (1)	1
Atf	group	Atf,ATF3,ATF6,MTOR,TP53,TP63	3	0.0272	0.0498	GRHL2,MAPT,PDCD6IP	3 (6)	3
RET	kinase	RET	1	0.0273	0.031	PER3	1 (1)	1
ERBB4	kinase	ERBB4,ERK1/2,PSEN1,TP53	2	0.0276	0.0485	MAPT,PDCD6IP,PER3	3 (4)	3
TGFBR	group	ERK1/2,MAPK14,PRKCD,TGFBR	2	0.0288	0.0437	GRHL2,MAPT	2 (4)	3
SYK	kinase	SYK	1	0.0289	0.0328	MAPT	1 (1)	1
HMOX1	enzyme	HMOX1	1	0.0299	0.0398	MAPT	1 (1)	1
CLOCK	transcription regulator	CLOCK	1	0.0326	0.0362	PER3	1 (1)	1
APOE	transporter	APOE	1	0.0328	0.0457	MAPT	1 (1)	1
MAPK14	kinase	MAPK14	1	0.0471	0.0462	MAPT	1 (1)	1

## Sheet: STable29
Supplementary Table 29: Diseases and Functional Analysis of Seven Top Prioritized Genes
Categories	Diseases or Functions Annotation	p-value	Molecules	# Molecules
Hereditary Disorder,Ophthalmic Disease,Organismal Injury and Abnormalities	Hereditary Eye Disease	4.43e-07	CHST6,GRHL2,MAPT,P4HTM,USH2A	5
Cell Morphology,Connective Tissue Development and Function	Morphology of fibroblast cell lines	3.5e-06	GRHL2,MAPT,PDCD6IP	3
Developmental Disorder,Hereditary Disorder,Ophthalmic Disease,Organismal Injury and Abnormalities	Hereditary corneal dystrophy	1.9e-05	CHST6,GRHL2	2
Cell Death and Survival,Organismal Injury and Abnormalities	Cell death of epithelial cell lines	0.000181	GRHL2,MAPT,PDCD6IP	3
Cell Death and Survival	Cell death of motor neurons	0.000213	MAPT,PDCD6IP	2
Ophthalmic Disease,Organismal Injury and Abnormalities	Visual disturbance	0.000213	P4HTM,USH2A	2
Cancer,Gastrointestinal Disease,Organismal Injury and Abnormalities	Upper gastrointestinal carcinoma	0.00022	CHST6,GRHL2,MAPT,P4HTM,PDCD6IP,PER3,USH2A	7
Embryonic Development,Nervous System Development and Function,Organ Development,Organ Morphology,Organismal Development,Tissue Development,Visual System Development and Function	Morphology of eye	0.000225	CHST6,MAPT,USH2A	3
Cell Death and Survival	Apoptosis of breast cell lines	0.000279	GRHL2,MAPT	2
Cell Morphology,Cellular Assembly and Organization,Cellular Function and Maintenance	Extension of microtentacles	0.000297	MAPT	1
Cancer,Cell-To-Cell Signaling and Interaction,Cellular Compromise,Organismal Injury and Abnormalities	Oxidative stress response of neuroblastoma cells	0.000297	MAPT	1
Developmental Disorder,Hereditary Disorder,Ophthalmic Disease,Organismal Injury and Abnormalities	Macular corneal dystrophy type II	0.000297	CHST6	1
Developmental Disorder,Hereditary Disorder,Ophthalmic Disease,Organismal Injury and Abnormalities	Macular corneal dystrophy type I	0.000297	CHST6	1
Cell Morphology,Reproductive System Development and Function	Shape of gonadal cell lines	0.000297	MAPT	1
Developmental Disorder,Hereditary Disorder,Ophthalmic Disease,Organismal Injury and Abnormalities	Posterior polymorphous corneal dystrophy 4	0.000297	GRHL2	1
Hematological Disease,Neurological Disease,Organismal Injury and Abnormalities	Mild disrupted blood brain barrier	0.000297	MAPT	1
Hereditary Disorder,Neurological Disease,Organismal Injury and Abnormalities,Psychological Disorders	Pallidopontonigral degeneration	0.000297	MAPT	1
Cellular Assembly and Organization,Cellular Function and Maintenance	Density of endoplasmic reticulum	0.000297	MAPT	1
Cellular Assembly and Organization,Tissue Development	Formation of tau filament	0.000297	MAPT	1
Cardiovascular Disease,Inflammatory Disease,Neurological Disease,Organismal Injury and Abnormalities,Psychological Disorders	Subcortical arteriosclerotic encephalopathy	0.000297	MAPT	1
Neurological Disease,Ophthalmic Disease,Organismal Injury and Abnormalities,Psychological Disorders	Neuroaxonal dystrophy of optic nerve	0.000297	MAPT	1
Cellular Compromise,Neurological Disease,Organismal Injury and Abnormalities,Tissue Morphology	Degeneration of anterior bulbar cells	0.000297	MAPT	1
Infectious Diseases	Replication of Rous sarcoma virus	0.000297	PDCD6IP	1
Cellular Compromise,Neurological Disease,Tissue Morphology	Degeneration of glial cell projections	0.000297	MAPT	1
Cellular Assembly and Organization	Translocation of peroxisomes	0.000297	MAPT	1
Hereditary Disorder,Neurological Disease,Ophthalmic Disease,Organismal Functions,Organismal Injury and Abnormalities,Psychological Disorders,Skeletal and Muscular Disorders	Atypical progressive supranuclear palsy type 1	0.000297	MAPT	1
Hereditary Disorder,Neurological Disease,Organismal Injury and Abnormalities	Familial advanced sleep phase syndrome type 3	0.000297	PER3	1
Cellular Assembly and Organization,Cellular Movement,Nervous System Development and Function	Translocation of neurofilaments	0.000297	MAPT	1
Lipid Metabolism,Small Molecule Biochemistry	Critical micelle concentration of palmitoleic acid	0.000297	MAPT	1
Cell-To-Cell Signaling and Interaction,Cellular Compromise	Oxidative stress response of neuroblastoma cell lines	0.000297	MAPT	1
Cancer,Organismal Injury and Abnormalities,Reproductive System Disease	Initiation of tumorigenesis of breast cancer cell lines	0.000297	GRHL2	1
Developmental Disorder,Hereditary Disorder,Neurological Disease,Ophthalmic Disease,Organismal Injury and Abnormalities,Psychological Disorders,Respiratory Disease,Skeletal and Muscular Disorders	Hypotonia, hypoventilation, impaired intellectual development, dysautonomia, epilepsy and eye abnormalities	0.000297	P4HTM	1
Hereditary Disorder,Neurological Disease,Organismal Injury and Abnormalities,Psychological Disorders	Familial corticobasal syndrome	0.000297	MAPT	1
Infectious Diseases	Release of Yellow fever virus strain 17DD	0.000297	PDCD6IP	1
Cellular Development,Tissue Development	Differentiation of basal stem cells	0.000297	GRHL2	1
Lipid Metabolism,Small Molecule Biochemistry	Critical micelle concentration of stearic acid	0.000297	MAPT	1
Cell-To-Cell Signaling and Interaction,Nervous System Development and Function	Firing of striatal neurons	0.000297	MAPT	1
Developmental Disorder,Hereditary Disorder,Organismal Injury and Abnormalities	Ectodermal dysplasia/short stature syndrome	0.000297	GRHL2	1
Neurological Disease,Organismal Injury and Abnormalities,Psychological Disorders	Tauopathy of neurons	0.000297	MAPT	1
Cellular Development	Epithelial to mesenchymal transdifferentiation of breast cancer cell lines	0.000297	GRHL2	1
Cellular Assembly and Organization,Cellular Function and Maintenance,Tissue Development	Self-assembly of microtubules	0.000297	MAPT	1
Cell Morphology,Infectious Diseases,Organismal Development	Budding of Rous sarcoma virus	0.000297	PDCD6IP	1
Behavior	Disinhibited behavior	0.000297	MAPT	1
Neurological Disease,Skeletal and Muscular Disorders	Mild motor dysfunction	0.000297	MAPT	1
Auditory Disease,Hereditary Disorder,Neurological Disease,Organismal Injury and Abnormalities	Nonsyndromic dominant deafness, DFNA28	0.000297	GRHL2	1
Neurological Disease,Organismal Injury and Abnormalities	Mild astrocytosis	0.000297	MAPT	1
Cellular Assembly and Organization	Redistribution of early endosomes	0.000297	PDCD6IP	1
Lipid Metabolism,Small Molecule Biochemistry	Critical micelle concentration of arachidonic acid	0.000297	MAPT	1
Developmental Disorder,Hereditary Disorder,Ophthalmic Disease,Organismal Injury and Abnormalities	Retinitis pigmentosa type 39	0.000297	USH2A	1
Carbohydrate Metabolism	Binding of carbohydrate	0.000391	MAPT,USH2A	2
Neurological Disease	Late-onset neurological disorder	0.000445	GRHL2,MAPT	2
Neurological Disease,Organismal Injury and Abnormalities	Astrocytosis	0.000453	MAPT,PDCD6IP	2
Organismal Development,Organismal Injury and Abnormalities	Abnormal morphology of head	0.000488	CHST6,MAPT,PDCD6IP,USH2A	4
Cell Morphology,Cellular Assembly and Organization,Cellular Function and Maintenance	Shortening of microtubules	0.000593	MAPT	1
Neurological Disease,Organismal Injury and Abnormalities	Working memory deficit	0.000593	MAPT	1
Neurological Disease	Axonopathy of neurons	0.000593	MAPT	1
Neurological Disease,Organismal Injury and Abnormalities,Psychological Disorders	Corticobasal degeneration	0.000593	MAPT	1
Nervous System Development and Function,Organ Morphology,Organismal Development	Size of entorhinal area	0.000593	MAPT	1
Cellular Assembly and Organization	Accumulation of ribosome	0.000593	MAPT	1
Cell Morphology,Cellular Assembly and Organization	Integrity of mitochondrial membrane	0.000593	MAPT	1
Cellular Development,Cellular Growth and Proliferation,Nervous System Development and Function,Organ Development,Tissue Development	Proliferation of hippocampal neurons	0.000593	MAPT	1
Hereditary Disorder,Neurological Disease,Organismal Injury and Abnormalities,Psychological Disorders,Skeletal and Muscular Disorders	Parkinson-dementia syndrome	0.000593	MAPT	1
Cell-To-Cell Signaling and Interaction,Nervous System Development and Function	Synaptic transmission of mossy fibers	0.000593	MAPT	1
Cell Morphology	Vacuolation of tubulovesicular structures	0.000593	PDCD6IP	1
Cancer,Organismal Injury and Abnormalities	Transformation of microglia	0.000593	MAPT	1
Cellular Assembly and Organization	Generation of tau filament	0.000593	MAPT	1
Embryonic Development,Organismal Development	Development of head	0.000638	CHST6,GRHL2,MAPT,USH2A	4
Auditory Disease,Hereditary Disorder,Neurological Disease,Organismal Injury and Abnormalities	Familial nonsyndromic hearing impairment	0.00065	GRHL2,USH2A	2
Cell Morphology,Cellular Movement	Cell spreading of lung cell lines	0.00089	PDCD6IP	1
Neurological Disease,Organismal Injury and Abnormalities,Psychological Disorders	Braak stage I-II tauopathy	0.00089	MAPT	1
Lipid Metabolism,Molecular Transport,Small Molecule Biochemistry	Quantity of lysobisphosphatidic acid	0.00089	PDCD6IP	1
Cellular Assembly and Organization	Translocation of Golgi vesicles	0.00089	MAPT	1
Neurological Disease,Organismal Injury and Abnormalities	Astrocytosis of tissue	0.00089	MAPT	1
Neurological Disease,Organismal Injury and Abnormalities	Neurological disorder of subiculum	0.00089	MAPT	1
Neurological Disease,Organismal Injury and Abnormalities	Granulovacuolar degeneration of neurons	0.00089	MAPT	1
Embryonic Development,Nervous System Development and Function,Organ Development,Organ Morphology,Organismal Development,Tissue Development,Visual System Development and Function	Thickness of cornea	0.00089	CHST6	1
Behavior,Nervous System Development and Function	Associative memory	0.00089	MAPT	1
Cellular Assembly and Organization,Cellular Compromise	Formation of fibrillar inclusions	0.00089	MAPT	1
Cellular Assembly and Organization,Cellular Compromise,Cellular Function and Maintenance	Severing of microtubules	0.00089	MAPT	1
Cell Morphology,Cellular Compromise	Swelling of Golgi apparatus	0.00089	MAPT	1
Behavior	Reversal learning	0.00089	MAPT	1
Cell Cycle	Aneuploidization of breast cell lines	0.00089	MAPT	1
Carbohydrate Metabolism,Molecular Transport,Small Molecule Biochemistry	Quantity of keratan sulfate	0.00089	CHST6	1
Nervous System Development and Function	Mechanosensory function	0.00089	MAPT	1
Cellular Development,Hair and Skin Development and Function	Epithelial to mesenchymal transdifferentiation of epithelial cell lines	0.00089	GRHL2	1
Neurological Disease,Organismal Injury and Abnormalities,Psychological Disorders	Tauopathy of amygdala	0.00089	MAPT	1
Nervous System Development and Function,Organ Morphology,Tissue Morphology	Quantity of CA1 neuron	0.00089	MAPT	1
Cellular Compromise,Neurological Disease,Organismal Injury and Abnormalities	Atrophy of apical processes	0.00089	MAPT	1
Auditory Disease,Hereditary Disorder,Neurological Disease,Ophthalmic Disease,Organismal Injury and Abnormalities	Usher syndrome type 2A	0.00089	USH2A	1
Metabolic Disease,Neurological Disease,Organismal Injury and Abnormalities,Psychological Disorders	Braak stage V-VI Alzheimer disease	0.00089	MAPT	1
Cellular Compromise,Neurological Disease,Organismal Injury and Abnormalities	Lesioning of neurons	0.00089	MAPT	1
Cellular Function and Maintenance	Retention of breast cancer cell lines	0.00089	MAPT	1
Cancer,Gastrointestinal Disease,Organismal Injury and Abnormalities	Gastric carcinoma	0.000922	CHST6,GRHL2,P4HTM,PDCD6IP,PER3,USH2A	6
Nervous System Development and Function,Organ Morphology,Organismal Development	Morphology of hippocampus	0.00111	MAPT,PDCD6IP	2
Behavior	Cued learning	0.00119	MAPT	1
Neurological Disease,Organismal Injury and Abnormalities	Neurodegeneration of dentate gyrus	0.00119	MAPT	1
Cell Death and Survival,Cellular Compromise,Neurological Disease,Tissue Morphology	Degeneration of perikaryon	0.00119	MAPT	1
Cell Morphology,Infectious Diseases,Organismal Development	Budding of Equine infectious anemia virus	0.00119	PDCD6IP	1
Cell-To-Cell Signaling and Interaction	Detachment of cervical cancer cell lines	0.00119	PDCD6IP	1
Carbohydrate Metabolism,Small Molecule Biochemistry	Binding of heparan sulfate proteoglycan	0.00119	MAPT	1
Developmental Disorder,Hereditary Disorder,Metabolic Disease,Neurological Disease,Organismal Injury and Abnormalities,Psychological Disorders	Alzheimers disease type 3	0.00119	MAPT	1
Cell Death and Survival,Cellular Compromise,Neurological Disease,Organismal Injury and Abnormalities,Tissue Morphology	Neurodegeneration of CA3 neurons	0.00119	MAPT	1
Cell Cycle	Aneuploidy of chromosomes	0.00119	MAPT	1
Cellular Assembly and Organization,Cellular Function and Maintenance,Cellular Movement,Nervous System Development and Function	Fast axonal transport	0.00119	MAPT	1
Cell Death and Survival,Cellular Compromise,Neurological Disease,Tissue Morphology	Degeneration of dendrites	0.00119	MAPT	1
Metabolic Disease,Neurological Disease,Organismal Injury and Abnormalities,Psychological Disorders	Braak stage III-IV Alzheimer disease	0.00119	MAPT	1
Cell Morphology,Cellular Assembly and Organization,Nervous System Development and Function,Tissue Morphology	Size of postsynaptic density	0.00119	MAPT	1
Cellular Assembly and Organization,Cellular Function and Maintenance	Aggregation of microtubules	0.00119	MAPT	1
Cancer,Dermatological Diseases and Conditions,Organismal Injury and Abnormalities	Skin carcinoma	0.00133	CHST6,GRHL2,MAPT,USH2A	4
Cell-To-Cell Signaling and Interaction,Nervous System Development and Function	Long-term potentiation of hippocampal CA3 region	0.00148	MAPT	1
Cellular Assembly and Organization,Cellular Compromise	Formation of tau aggregates	0.00148	MAPT	1
Amino Acid Metabolism,Post-Translational Modification,Small Molecule Biochemistry	Acetylation of amino acids	0.00148	MAPT	1
Cell Death and Survival,Cell-To-Cell Signaling and Interaction,Cellular Compromise,Neurological Disease,Tissue Morphology	Degeneration of synapse	0.00148	MAPT	1
Connective Tissue Disorders,Inflammatory Disease,Inflammatory Response,Organismal Injury and Abnormalities,Skeletal and Muscular Disorders	Type II collagen-induced arthritis	0.00148	MAPT	1
Behavior	Spontaneous alternation behavior	0.00148	MAPT	1
Cellular Assembly and Organization,Neurological Disease	Accumulation of amyloid-beta plaques	0.00148	MAPT	1
Hematological System Development and Function,Humoral Immune Response,Lymphoid Tissue Structure and Development,Tissue Morphology	Quantity of plasmablasts	0.00148	MAPT	1
Cell-To-Cell Signaling and Interaction,Nervous System Development and Function	Synaptic transmission of collateral synapses	0.00148	MAPT	1
Cell-To-Cell Signaling and Interaction,Inflammatory Response,Nervous System Development and Function	Cytotoxic reaction of neurons	0.00148	MAPT	1
Cell Morphology,Cellular Assembly and Organization,Cellular Development,Cellular Function and Maintenance,Cellular Growth and Proliferation,Embryonic Development,Nervous System Development and Function,Organismal Development,Tissue Development	Sprouting of mossy fibers	0.00148	MAPT	1
Cellular Development,Reproductive System Development and Function	Epithelial to mesenchymal transdifferentiation of breast cell lines	0.00148	GRHL2	1
Cell Cycle	Aneuploidization of epithelial cell lines	0.00148	MAPT	1
Cell Death and Survival,Cell Morphology,Nervous System Development and Function,Neurological Disease,Organ Morphology,Organismal Development,Organismal Injury and Abnormalities,Tissue Morphology	Loss of granule cells	0.00148	MAPT	1
Cell Signaling,Cellular Function and Maintenance,Small Molecule Biochemistry,Vitamin and Mineral Metabolism	Calcium homeostasis of neurons	0.00148	MAPT	1
Cellular Assembly and Organization,Neurological Disease,Organismal Development,Tissue Development	Formation of senile plaques	0.00148	MAPT	1
Cellular Assembly and Organization,Cellular Function and Maintenance	Formation of vesicles	0.00161	MAPT,PDCD6IP	2
Protein Synthesis	Polymerization of protein	0.00162	MAPT,PDCD6IP	2
Cancer,Dermatological Diseases and Conditions,Organismal Injury and Abnormalities	Basal cell carcinoma	0.00171	GRHL2,MAPT,USH2A	3
Cellular Assembly and Organization	Quantity of amyloid-beta plaques	0.00178	MAPT	1
Cellular Assembly and Organization,Cellular Function and Maintenance	Dissociation of microtubules	0.00178	MAPT	1
Hereditary Disorder,Neurological Disease,Organismal Injury and Abnormalities,Psychological Disorders,Skeletal and Muscular Disorders	Autosomal dominant late-onset Parkinson disease	0.00178	MAPT	1
Cell Morphology,Cellular Assembly and Organization,Cellular Compromise,Cellular Function and Maintenance	Loss of microtubules	0.00178	MAPT	1
Hereditary Disorder,Neurological Disease,Organismal Injury and Abnormalities,Psychological Disorders	Pick disease	0.00178	MAPT	1
Cell Morphology,Nervous System Development and Function,Neurological Disease,Tissue Morphology	Loss of motor axons	0.00178	MAPT	1
Cell-To-Cell Signaling and Interaction	Adhesion of bladder cancer cell lines	0.00178	CHST6	1
Cell Morphology,Cellular Assembly and Organization,Nervous System Development and Function,Tissue Morphology	Diameter of axons	0.00178	MAPT	1
Infectious Diseases,Neurological Disease,Organismal Injury and Abnormalities,Psychological Disorders,Skeletal and Muscular Disorders	Creutzfeldt-Jakob disease	0.00178	MAPT	1
Nervous System Development and Function,Organ Morphology,Organismal Development	Size of brain	0.00199	MAPT,PDCD6IP	2
Neurological Disease,Organismal Injury and Abnormalities	Gliosis of hippocampal CA1 region	0.00207	MAPT	1
Metabolic Disease,Neurological Disease,Organismal Injury and Abnormalities,Psychological Disorders	Severe Alzheimer disease	0.00207	MAPT	1
Neurological Disease,Organismal Injury and Abnormalities	Neurodegeneration of hippocampal CA1 region	0.00207	MAPT	1
Metabolic Disease,Neurological Disease,Organismal Injury and Abnormalities,Psychological Disorders	Moderate Alzheimer disease	0.00207	MAPT	1
Cell Morphology	Morphology of lung cell lines	0.00207	PDCD6IP	1
Cellular Development,Nervous System Development and Function,Tissue Development	Differentiation of hippocampal neurons	0.00207	MAPT	1
Cellular Assembly and Organization,Nervous System Development and Function	Accumulation of neurofilaments	0.00207	MAPT	1
Developmental Disorder,Neurological Disease,Psychological Disorders	Neurobehavioral deficit	0.00207	MAPT	1
Cell Morphology,Cellular Movement,Reproductive System Development and Function	Elongation of gonadal cell lines	0.00207	MAPT	1
Cellular Development,Tissue Development	Differentiation of bronchial epithelial cells	0.00207	GRHL2	1
Neurological Disease,Organismal Injury and Abnormalities,Psychological Disorders	Tauopathy of hippocampus	0.00207	MAPT	1
Cellular Assembly and Organization,Nervous System Development and Function,Tissue Morphology	Quantity of neurofibrillary tangles	0.00207	MAPT	1
Neurological Disease,Organismal Injury and Abnormalities,Psychological Disorders	Age-associated memory impairment	0.00207	MAPT	1
Nervous System Development and Function,Organ Morphology,Organismal Development	Morphology of telencephalon	0.00236	MAPT,PDCD6IP	2
Embryonic Development,Organ Development,Organ Morphology,Organismal Development,Respiratory System Development and Function,Tissue Development	Morphogenesis of lung lobe	0.00237	GRHL2	1
Carbohydrate Metabolism,Lipid Metabolism,Small Molecule Biochemistry	Binding of phosphatidylinositol 4,5-diphosphate	0.00237	USH2A	1
Cellular Assembly and Organization,Neurological Disease,Organismal Development,Tissue Development	Formation of amyloid-beta plaques	0.00237	MAPT	1
Cell Morphology,Cellular Assembly and Organization	Length of mitochondria	0.00237	MAPT	1
Cellular Compromise	Degeneration of mitochondria	0.00237	MAPT	1
Organismal Injury and Abnormalities	Dysfunction of mice	0.00237	MAPT	1
Cancer,Organismal Injury and Abnormalities,Reproductive System Disease	Tumorigenesis of cervical cancer cell lines	0.00237	PDCD6IP	1
RNA Damage and Repair	Metabolism of rRNA	0.00237	MAPT	1
Cancer,Gastrointestinal Disease,Organismal Injury and Abnormalities	Development of digestive organ tumor	0.00242	CHST6,GRHL2,MAPT,P4HTM,PDCD6IP,PER3,USH2A	7
Cell Morphology,Cellular Assembly and Organization,Cellular Development,Cellular Function and Maintenance,Cellular Growth and Proliferation,Nervous System Development and Function,Organismal Development,Tissue Development	Polarization of hippocampal neurons	0.00267	MAPT	1
Behavior,Digestive System Development and Function	Sucrose preference	0.00267	MAPT	1
Cell Morphology,Cellular Assembly and Organization,Cellular Function and Maintenance	Length of microtubules	0.00267	MAPT	1
Nervous System Development and Function,Neurological Disease	Abnormal morphology of ependyma	0.00267	PDCD6IP	1
Inflammatory Disease,Inflammatory Response,Neurological Disease,Organismal Injury and Abnormalities	Inflammation of hippocampus	0.00296	MAPT	1
Hematological System Development and Function	Decreased hematocrit of organism	0.00296	P4HTM	1
Organ Morphology,Organismal Injury and Abnormalities,Respiratory Disease,Respiratory System Development and Function,Tissue Morphology	Abnormal morphology of tracheal ciliated epithelium	0.00296	PDCD6IP	1
Developmental Disorder,Hereditary Disorder,Ophthalmic Disease,Organismal Injury and Abnormalities	Progressive cone dystrophy without rod involvement	0.00296	USH2A	1
Cell Morphology,Embryonic Development,Nervous System Development and Function,Ophthalmic Disease,Organ Development,Organ Morphology,Organismal Development,Organismal Injury and Abnormalities,Tissue Development,Tissue Morphology,Visual System Development and Function	Abnormal morphology of short photoreceptor inner segments	0.00296	USH2A	1
Embryonic Development,Nervous System Development and Function,Ophthalmic Disease,Organ Development,Organ Morphology,Organismal Development,Organismal Injury and Abnormalities,Tissue Development,Visual System Development and Function	Thinning of cornea	0.00296	CHST6	1
Auditory Disease,Hereditary Disorder,Neurological Disease,Ophthalmic Disease,Organismal Injury and Abnormalities	Retinitis pigmentosa-deafness syndrome	0.00296	USH2A	1
Embryonic Development,Nervous System Development and Function,Organ Development,Organ Morphology,Organismal Development,Tissue Development,Tissue Morphology,Visual System Development and Function	Thickness of corneal stroma	0.00296	CHST6	1
Organismal Development	Strength of mice	0.00326	MAPT	1
Embryonic Development,Nervous System Development and Function,Ophthalmic Disease,Organ Development,Organ Morphology,Organismal Development,Organismal Injury and Abnormalities,Tissue Development,Visual System Development and Function	Abnormal morphology of photoreceptor layer	0.00326	USH2A	1
Auditory Disease,Hereditary Disorder,Neurological Disease,Ophthalmic Disease,Organismal Injury and Abnormalities	Usher syndrome type 1	0.00326	USH2A	1
Hereditary Disorder,Neurological Disease,Organismal Injury and Abnormalities	Autosomal recessive neurological disorder	0.00335	MAPT,P4HTM,USH2A	3
Cell Death and Survival,Organismal Injury and Abnormalities	Apoptosis of epithelial cell lines	0.00337	GRHL2,MAPT	2
Cellular Development,Cellular Growth and Proliferation,Embryonic Development,Organ Development,Organismal Development,Renal and Urological System Development and Function,Tissue Development	Tubulogenesis of kidney cell lines	0.00355	GRHL2	1
Metabolic Disease,Neurological Disease,Organismal Injury and Abnormalities,Psychological Disorders	Mild Alzheimer disease	0.00355	MAPT	1
Cellular Assembly and Organization,Neurological Disease	Deposition of amyloid-beta plaques	0.00355	MAPT	1
Organ Morphology	Enlargement of lateral cerebral ventricle	0.00355	MAPT	1
Cell-To-Cell Signaling and Interaction,Respiratory System Development and Function	Adhesion of lung cell lines	0.00355	PDCD6IP	1
Cellular Assembly and Organization,Cellular Compromise,Cellular Development,Cellular Growth and Proliferation,Nervous System Development and Function,Tissue Development	Formation of neurofibrillary tangles	0.00355	MAPT	1
Cell Morphology,Nervous System Development and Function,Organ Morphology,Organismal Development,Tissue Morphology	Morphology of dorsal root ganglion cells	0.00355	MAPT	1
Cancer,Organismal Injury and Abnormalities,Respiratory Disease	Pulmonary blastoma in lung pleura	0.00355	USH2A	1
Cellular Assembly and Organization,Cellular Compromise,Cellular Function and Maintenance	Instability of microtubules	0.00355	MAPT	1
Cellular Assembly and Organization,Cellular Function and Maintenance	Quantity of plasma membrane projections	0.00355	MAPT	1
Cellular Development,Nervous System Development and Function,Tissue Development	Maturation of dendritic spines	0.00385	MAPT	1
Developmental Disorder,Neurological Disease	Learning deficit	0.00385	MAPT	1
Carbohydrate Metabolism,Small Molecule Biochemistry	Metabolism of N-acetylglucosamine	0.00385	CHST6	1
Cancer,Organismal Injury and Abnormalities	Metastatic potential of breast cancer cell lines	0.00385	GRHL2	1
Cell-To-Cell Signaling and Interaction,Cellular Assembly and Organization,Cellular Function and Maintenance,Tissue Development	Formation of fibronectin matrix	0.00385	PDCD6IP	1
Cell Death and Survival	Anoikis of breast cell lines	0.00385	GRHL2	1
Developmental Disorder,Hereditary Disorder,Metabolic Disease,Neurological Disease,Organismal Injury and Abnormalities,Psychological Disorders	Autosomal recessive familial Alzheimer disease 1	0.00385	MAPT	1
Cell Morphology,Cellular Assembly and Organization	Elongation of mitochondria	0.00415	MAPT	1
Cellular Development,Connective Tissue Development and Function,Embryonic Development	Adipogenesis of mesenchymal stem cells	0.00415	PER3	1
Hematological System Development and Function,Inflammatory Response,Tissue Morphology	Quantity of inflammatory monocytes	0.00415	MAPT	1
Neurological Disease,Organismal Injury and Abnormalities	Abnormality of cerebral cortex	0.00422	MAPT,PDCD6IP	2
Cell Morphology	Morphology of tumor cell lines	0.00443	GRHL2,PDCD6IP	2
Neurological Disease,Organ Morphology,Organismal Injury and Abnormalities,Psychological Disorders	Atrophy of hippocampus	0.00444	MAPT	1
Nervous System Development and Function,Tissue Morphology	Density of axons	0.00444	MAPT	1
Molecular Transport	Export of heavy metal	0.00474	MAPT	1
Cellular Assembly and Organization,Cellular Function and Maintenance	Formation of membrane blebs	0.00474	MAPT	1
Developmental Disorder,Hereditary Disorder,Ophthalmic Disease,Organismal Injury and Abnormalities	Congenital stationary night blindness type 1	0.00474	USH2A	1
Neurological Disease,Organismal Injury and Abnormalities	Astrocytosis of hippocampus	0.00474	MAPT	1
Nervous System Development and Function,Organ Morphology,Organismal Development	Volume of cerebrum	0.00474	MAPT	1
Cellular Assembly and Organization,Cellular Function and Maintenance	Density of microtubules	0.00474	MAPT	1
Cellular Assembly and Organization	Clustering of mitochondria	0.00503	MAPT	1
Cell Morphology	Length of plasma membrane projections	0.00503	MAPT	1
Cell-To-Cell Signaling and Interaction,Cellular Assembly and Organization,Cellular Function and Maintenance,Nervous System Development and Function,Tissue Development	Function of synapse	0.00503	MAPT	1
Cellular Assembly and Organization,Cellular Compromise,Cellular Function and Maintenance	Disruption of microtubules	0.00503	MAPT	1
Behavior,Nervous System Development and Function	Contextual fear memory	0.00503	MAPT	1
Embryonic Development,Nervous System Development and Function,Ophthalmic Disease,Organ Development,Organ Morphology,Organismal Development,Organismal Injury and Abnormalities,Tissue Development,Visual System Development and Function	Abnormal morphology of eye	0.0051	CHST6,USH2A	2
Cell Morphology,Cellular Movement	Cell spreading	0.0052	MAPT,PDCD6IP	2
Tissue Development	Formation of lumen	0.00533	MAPT	1
Cellular Assembly and Organization,Cellular Function and Maintenance	Localization of mitochondria	0.00533	MAPT	1
Cellular Assembly and Organization,Cellular Function and Maintenance	Dynamics of microtubules	0.00533	MAPT	1
Auditory Disease,Hereditary Disorder,Neurological Disease,Organismal Injury and Abnormalities	Hereditary age-related sensorineural hearing loss	0.00562	GRHL2	1
Auditory and Vestibular System Development and Function,Nervous System Development and Function,Organ Morphology,Tissue Morphology	Quantity of outer hair cells	0.00562	USH2A	1
Cell Morphology,Cellular Compromise	Vacuolation of cytoplasm	0.00592	PDCD6IP	1
Embryonic Development,Nervous System Development and Function,Ophthalmic Disease,Organ Development,Organ Morphology,Organismal Development,Organismal Injury and Abnormalities,Tissue Development,Tissue Morphology,Visual System Development and Function	Abnormal morphology of corneal stroma	0.00592	CHST6	1
Behavior	Fear conditioning	0.00592	MAPT	1
Cell Death and Survival,Organismal Injury and Abnormalities	Anoikis of epithelial cell lines	0.00592	GRHL2	1
Cell Death and Survival,Organismal Injury and Abnormalities,Renal and Urological Disease	Cell death of kidney cell lines	0.00605	MAPT,PDCD6IP	2
Behavior	Emotional behavior	0.00637	MAPT,PER3	2
Cell-To-Cell Signaling and Interaction	Signaling of neurons	0.00651	MAPT	1
Cardiovascular Disease,Neurological Disease,Organismal Injury and Abnormalities	Acute stroke	0.00651	MAPT	1
Cell Death and Survival,Cellular Compromise,Neurological Disease,Organismal Injury and Abnormalities,Tissue Morphology	Neurodegeneration of hippocampal neurons	0.00651	MAPT	1
Cellular Assembly and Organization,Cellular Function and Maintenance,Cellular Movement,Nervous System Development and Function	Axonal transport of mitochondria	0.00651	MAPT	1
Cell-To-Cell Signaling and Interaction,Nervous System Development and Function	Long-term potentiation of collateral synapses	0.00651	MAPT	1
Cellular Movement,Hematological System Development and Function,Immune Cell Trafficking,Inflammatory Response,Nervous System Development and Function	Migration of microglia	0.0068	MAPT	1
Cell Death and Survival	Anoikis of breast cancer cell lines	0.0068	GRHL2	1
Cell Morphology,Cellular Assembly and Organization,Cellular Development,Cellular Function and Maintenance,Cellular Growth and Proliferation,Embryonic Development,Nervous System Development and Function,Neurological Disease,Organismal Development,Tissue Development,Tissue Morphology	Loss of dendritic spines	0.0068	MAPT	1
Cellular Assembly and Organization	Accumulation of mitochondria	0.0068	MAPT	1
Cellular Compromise,Ophthalmic Disease,Organismal Injury and Abnormalities,Tissue Morphology	Degeneration of retinal cone cells	0.0068	USH2A	1
Molecular Transport,RNA Trafficking	Accumulation of RNA	0.0071	MAPT	1
Cell Death and Survival,Organismal Injury and Abnormalities	Cell death of neuroepithelial cells	0.0071	PDCD6IP	1
Cell Morphology,Cell-To-Cell Signaling and Interaction,Cellular Assembly and Organization,Nervous System Development and Function,Neurological Disease,Tissue Morphology	Loss of synapse	0.0071	MAPT	1
Cell Morphology,Cellular Assembly and Organization,Cellular Development,Cellular Function and Maintenance,Cellular Growth and Proliferation,Embryonic Development,Nervous System Development and Function,Organismal Development,Tissue Development,Tissue Morphology	Length of dendritic spines	0.0071	MAPT	1
Cell Cycle,Gene Expression	Binding of cAMP response element	0.0071	MAPT	1
Cellular Assembly and Organization,Cellular Function and Maintenance	Organization of cytoplasmic microtubule	0.00739	MAPT	1
Behavior	Coping response	0.00769	MAPT	1
Cell Cycle,Gene Expression	Binding of interferon-gamma activated sequence	0.00769	MAPT	1
Nervous System Development and Function,Neurological Disease,Organ Morphology,Organismal Development,Organismal Injury and Abnormalities	Abnormal morphology of choroid plexus	0.00769	PDCD6IP	1
Auditory Disease,Organismal Injury and Abnormalities	Abnormal function of inner ear	0.00769	USH2A	1
Developmental Disorder,Hereditary Disorder,Ophthalmic Disease,Organismal Injury and Abnormalities	Familial cone dystrophy	0.00769	USH2A	1
Behavior,Nervous System Development and Function	Working memory	0.00798	MAPT	1
Behavior	Despair behavior	0.00828	PER3	1
Cellular Function and Maintenance	Hyperpolarization of membrane	0.00828	MAPT	1
Cellular Assembly and Organization,Cellular Function and Maintenance	Formation of multivesicular bodies	0.00828	PDCD6IP	1
Cell Death and Survival	Apoptosis of motor neurons	0.00828	PDCD6IP	1
Cellular Assembly and Organization,Cellular Function and Maintenance	Quantity of microtubules	0.00828	MAPT	1
Embryonic Development,Nervous System Development and Function,Organ Development,Organismal Development,Tissue Development	Neurogenesis of dentate gyrus	0.00828	MAPT	1
Cellular Assembly and Organization,Cellular Function and Maintenance	Growth of microtubules	0.00857	MAPT	1
Carbohydrate Metabolism,Small Molecule Biochemistry	Biosynthesis of keratan sulfate	0.00857	CHST6	1
Cellular Assembly and Organization,Cellular Function and Maintenance	Bundling of microtubules	0.00857	MAPT	1
Behavior	Sleep pattern	0.00857	PER3	1
Cardiovascular System Development and Function,Tissue Morphology	Diameter of blood vessel	0.00887	MAPT	1
Behavior	Nest building behavior	0.00887	MAPT	1
Neurological Disease,Organismal Injury and Abnormalities,Psychological Disorders,Skeletal and Muscular Disorders	Lewy body disease	0.00916	MAPT	1
Cell Morphology	Morphology of cervical cancer cell lines	0.00916	PDCD6IP	1
Cellular Assembly and Organization	Distribution of mitochondria	0.00946	MAPT	1
Neurological Disease,Organismal Injury and Abnormalities,Psychological Disorders	Multiple system atrophy	0.00946	MAPT	1
Cell Death and Survival,Embryonic Development	Cell death of embryonic cell lines	0.00956	MAPT,PDCD6IP	2
Cellular Compromise	Degeneration of cells	0.0096	MAPT,USH2A	2
Cellular Assembly and Organization,Cellular Function and Maintenance	Binding of microtubules	0.00975	MAPT	1
Cell Death and Survival	Cell viability of pheochromocytoma cell lines	0.00975	MAPT	1
Infectious Diseases	Binding of lentivirus	0.00975	PDCD6IP	1
Inflammatory Response,Neurological Disease	Neuroinflammation	0.01	MAPT	1
Cell Morphology,Cellular Function and Maintenance,Renal and Urological System Development and Function	Autophagy of kidney cell lines	0.01	MAPT	1
Cellular Assembly and Organization,Cellular Function and Maintenance	Attachment of microtubules	0.0103	MAPT	1
Metabolic Disease,Neurological Disease,Organismal Injury and Abnormalities,Psychological Disorders	Nonfamilial Alzheimer disease	0.0106	MAPT	1
Cell Death and Survival	Apoptosis of brain cancer cell lines	0.0109	MAPT	1
Cellular Development,Cellular Growth and Proliferation	Development of breast cell lines	0.0115	GRHL2	1
Cell Death and Survival,Neurological Disease,Organismal Injury and Abnormalities	Cell death of cerebellar granule cell	0.0115	MAPT	1
Neurological Disease,Organismal Injury and Abnormalities	Febrile seizure	0.0118	CHST6	1
Cell Morphology,Cellular Assembly and Organization,Nervous System Development and Function	Elongation of axons	0.0118	MAPT	1
Cellular Assembly and Organization,Cellular Compromise	Disruption of cytoskeleton	0.0118	MAPT	1
Hematological System Development and Function,Nervous System Development and Function,Tissue Morphology	Quantity of microglia	0.0118	MAPT	1
Cell Morphology,Cellular Function and Maintenance,Hair and Skin Development and Function	Autophagy of epithelial cell lines	0.0118	MAPT	1
Cellular Assembly and Organization	Formation of cytoskeleton	0.0121	MAPT,PDCD6IP	2
Cellular Assembly and Organization,Cellular Function and Maintenance	Nucleation of microtubules	0.0121	MAPT	1
Nervous System Development and Function,Tissue Morphology	Quantity of astrocytes	0.013	MAPT	1
Cell Morphology	Ruffling of plasma membrane	0.013	MAPT	1
Cell Morphology,Cellular Assembly and Organization	Accumulation of vesicles	0.0136	MAPT	1
Cellular Function and Maintenance,Organ Development,Tissue Development,Visual System Development and Function	Maintenance of photoreceptors	0.0136	USH2A	1
Behavior,Nervous System Development and Function	Passive avoidance learning	0.0136	MAPT	1
Nervous System Development and Function	Brain wave	0.0136	PER3	1
Cellular Function and Maintenance	Respiration of mitochondria	0.0139	MAPT	1
Cell Death and Survival	Apoptosis of neurons	0.014	MAPT,PDCD6IP	2
Developmental Disorder,Hereditary Disorder,Ophthalmic Disease,Organismal Injury and Abnormalities	Familial cone-rod dystrophy	0.0142	USH2A	1
Amino Acid Metabolism,Molecular Transport,Small Molecule Biochemistry	Concentration of L-glutamic acid	0.0142	MAPT	1
Cellular Assembly and Organization,Tissue Development	Formation of filaments	0.0143	MAPT,PDCD6IP	2
Nervous System Development and Function,Neurological Disease,Organ Morphology,Organismal Development,Organismal Injury and Abnormalities	Abnormal morphology of brain	0.0145	MAPT,PDCD6IP	2
Developmental Disorder,Hereditary Disorder,Ophthalmic Disease,Organismal Injury and Abnormalities	Leber congenital amaurosis type 1	0.0147	USH2A	1
Cellular Assembly and Organization,DNA Replication, Recombination, and Repair	Quantity of centrosome	0.0147	MAPT	1
Organismal Development	Fat body mass	0.015	PER3	1
Nervous System Development and Function,Tissue Morphology	Quantity of neurons	0.0152	MAPT,USH2A	2
Cell Morphology,Cellular Development,Cellular Growth and Proliferation,Organismal Development,Tissue Development	Morphogenesis of epithelial cells	0.0153	GRHL2	1
Cell-To-Cell Signaling and Interaction,Hair and Skin Development and Function	Adhesion of epithelial cell lines	0.0153	PDCD6IP	1
Infectious Diseases	Acute flu	0.0156	CHST6	1
Cell Death and Survival,Nervous System Development and Function	Cell viability of cortical neurons	0.0159	MAPT	1
Protein Synthesis	Homo-oligomerization of protein	0.0159	PDCD6IP	1
Behavior,Reproductive System Development and Function	Mating behavior	0.0159	MAPT	1
Neurological Disease,Organismal Injury and Abnormalities	Microgliosis	0.0159	MAPT	1
Cell Death and Survival	Apoptosis of gonadal cell lines	0.0168	MAPT	1
Cell Cycle,Cellular Assembly and Organization,Cellular Function and Maintenance,DNA Replication, Recombination, and Repair	Duplication of centrosome	0.0171	PDCD6IP	1
Cell-To-Cell Signaling and Interaction,Nervous System Development and Function	Long-term potentiation of hippocampal CA1 region	0.0171	MAPT	1
Protein Trafficking	Recruitment of protein	0.0171	USH2A	1
Cancer,Organismal Injury and Abnormalities	Neoplasia of cells	0.0172	CHST6,GRHL2,MAPT,PDCD6IP,PER3,USH2A	6
Cellular Assembly and Organization,Cellular Function and Maintenance,Nervous System Development and Function,Tissue Morphology	Quantity of axons	0.0174	MAPT	1
Cellular Assembly and Organization,Cellular Function and Maintenance	Organization of fibrils	0.0174	MAPT	1
Free Radical Scavenging,Molecular Transport	Quantity of superoxide	0.0174	MAPT	1
Cellular Assembly and Organization,Nervous System Development and Function,Tissue Morphology	Quantity of dendritic spines	0.0174	MAPT	1
Behavior	Vocalization	0.0174	MAPT	1
Cell-To-Cell Signaling and Interaction,Renal and Urological System Development and Function	Adhesion of kidney cell lines	0.0174	PDCD6IP	1
Infectious Diseases	Production of HIV-1	0.0177	PDCD6IP	1
Cardiovascular Disease,Neurological Disease,Organismal Injury and Abnormalities,Psychological Disorders	Vascular dementia	0.0177	MAPT	1
Cell Cycle	Fission of mitochondria	0.018	MAPT	1
Neurological Disease,Organismal Injury and Abnormalities	Mild cognitive impairment	0.018	MAPT	1
Cell Cycle,Gene Expression	Binding of DNA	0.0181	GRHL2,MAPT	2
Cellular Development	Epithelial-mesenchymal transition of breast cancer cell lines	0.0183	GRHL2	1
Embryonic Development,Organismal Development	Development of face	0.0183	GRHL2	1
Behavior,Organismal Functions	Walking	0.0183	MAPT	1
Cancer,Organismal Injury and Abnormalities	Neoplasia of tumor cell lines	0.0185	GRHL2,PDCD6IP	2
Cellular Assembly and Organization,Cellular Compromise,Cellular Function and Maintenance	Depolymerization of microtubules	0.0185	MAPT	1
Cell-To-Cell Signaling and Interaction,Embryonic Development	Adhesion of embryonic cell lines	0.0188	PDCD6IP	1
Cancer,Organismal Injury and Abnormalities	Development of adenocarcinoma	0.0191	CHST6,GRHL2,MAPT,P4HTM,PER3,USH2A	6
Cell Death and Survival	Apoptosis of tumor cell lines	0.0192	GRHL2,MAPT,PDCD6IP	3
Cancer,Organismal Injury and Abnormalities	Development of carcinoma	0.0199	CHST6,GRHL2,MAPT,P4HTM,PDCD6IP,PER3,USH2A	7
Embryonic Development,Organismal Development,Skeletal and Muscular System Development and Function	Morphogenesis of embryonic digit	0.02	GRHL2	1
Auditory Disease,Hereditary Disorder,Neurological Disease,Organismal Injury and Abnormalities	Autosomal recessive nonsyndromic hearing impairment	0.0203	USH2A	1
Embryonic Development,Nervous System Development and Function,Organ Development,Organismal Development,Tissue Development	Formation of brain	0.0203	GRHL2,MAPT	2
Neurological Disease,Organismal Injury and Abnormalities	Seizures	0.0204	CHST6,MAPT	2
Cellular Compromise	Fragmentation of mitochondria	0.0206	MAPT	1
Cell-To-Cell Signaling and Interaction,Nervous System Development and Function	Activation of astrocytes	0.0206	MAPT	1
Cell Death and Survival,DNA Replication, Recombination, and Repair	Condensation of chromatin	0.0209	MAPT	1
Nervous System Development and Function,Neurological Disease,Organ Morphology,Organismal Development,Organismal Injury and Abnormalities	Abnormal morphology of lateral cerebral ventricle	0.0209	PDCD6IP	1
Cell Morphology,Cellular Function and Maintenance,Embryonic Development	Autophagy of embryonic cell lines	0.0209	MAPT	1
Cell Death and Survival,DNA Replication, Recombination, and Repair	Fragmentation of DNA fragment	0.0212	MAPT	1
Tissue Morphology	Loss of neurons in central nervous system	0.0212	MAPT	1
Cell Signaling	Calcium-mediated signaling	0.0212	MAPT	1
Cell Morphology	Morphology of breast cancer cell lines	0.0215	GRHL2	1
Cell Morphology,Embryonic Development,Nervous System Development and Function,Ophthalmic Disease,Organ Development,Organ Morphology,Organismal Development,Organismal Injury and Abnormalities,Tissue Development,Tissue Morphology,Visual System Development and Function	Abnormal morphology of photoreceptor outer segments	0.0215	USH2A	1
Cell Death and Survival,Cell Signaling	Activation of caspase	0.0217	MAPT	1
Cellular Development,Reproductive System Development and Function	Epithelial-mesenchymal transition of breast cell lines	0.022	GRHL2	1
Nervous System Development and Function,Tissue Morphology	Quantity of motor neurons	0.0226	MAPT	1
Ophthalmic Disease,Organismal Injury and Abnormalities	Abnormal electrophysiology of eye	0.0229	USH2A	1
Cell-To-Cell Signaling and Interaction,Connective Tissue Development and Function	Adhesion of fibroblast cell lines	0.0229	PDCD6IP	1
Cellular Compromise,Lipid Metabolism,Small Molecule Biochemistry	Peroxidation of lipid	0.0235	MAPT	1
Cell-To-Cell Signaling and Interaction,Molecular Transport,Small Molecule Biochemistry	Concentration of 5-hydroxytryptamine	0.0238	MAPT	1
Cellular Assembly and Organization,Cellular Function and Maintenance,Tissue Development	Polymerization of microtubules	0.0241	MAPT	1
Cellular Development,Connective Tissue Development and Function	Adipogenesis of fibroblast cell lines	0.0247	PER3	1
Cell Death and Survival	Cell viability of neuroblastoma cell lines	0.0247	MAPT	1
Behavior,Nervous System Development and Function	Long-term memory	0.0247	MAPT	1
Cell-To-Cell Signaling and Interaction,Cellular Assembly and Organization,Nervous System Development and Function,Tissue Morphology	Quantity of synapse	0.0249	MAPT	1
Cellular Development,Cellular Growth and Proliferation,Hair and Skin Development and Function	Development of epithelial cell lines	0.0252	GRHL2	1
Behavior	Anxiety-like behavior	0.0252	MAPT	1
Cellular Response to Therapeutics	Sensitivity of lung cancer cell lines	0.0252	PDCD6IP	1
Cell-To-Cell Signaling and Interaction,Cellular Compromise,Cellular Function and Maintenance	Endoplasmic reticulum stress response of cells	0.0255	MAPT	1
Neurological Disease,Organismal Injury and Abnormalities	Spatial memory impairment	0.0255	MAPT	1
Behavior,Nervous System Development and Function	Recognition memory	0.0255	MAPT	1
Organismal Injury and Abnormalities	Organ Degeneration	0.0258	MAPT,USH2A	2
Behavior	Grooming	0.0264	MAPT	1
Cell Signaling,Molecular Transport,Small Molecule Biochemistry	Release of nitric oxide	0.027	MAPT	1
Cellular Response to Therapeutics	Sensitivity of carcinoma cell lines	0.0273	PDCD6IP	1
Neurological Disease,Organismal Injury and Abnormalities	Syndromic encephalopathy	0.0275	MAPT,P4HTM	2
Cell Death and Survival	Apoptosis of pheochromocytoma cell lines	0.0284	MAPT	1
Dermatological Diseases and Conditions,Infectious Diseases,Organismal Injury and Abnormalities	Leprosy	0.0284	MAPT	1
Cell-To-Cell Signaling and Interaction,Cellular Assembly and Organization,Cellular Function and Maintenance,Tissue Development	Organization of synapse	0.0293	MAPT	1
Cellular Growth and Proliferation,Organismal Development	Growth of yeast	0.0299	MAPT	1
Organismal Survival	Viability	0.0302	MAPT	1
Cell Cycle,Cellular Assembly and Organization,Cellular Function and Maintenance,DNA Replication, Recombination, and Repair	Organization of chromosomes	0.0305	MAPT	1
Cancer,Organismal Injury and Abnormalities,Respiratory Disease	Malignant neoplasm of respiratory system	0.031	CHST6,GRHL2,MAPT,PDCD6IP,USH2A	5
Developmental Disorder,DNA Replication, Recombination, and Repair,Hereditary Disorder,Organismal Injury and Abnormalities	Down syndrome	0.0313	MAPT	1
Cancer,Organismal Injury and Abnormalities	Ductal carcinoma	0.0315	CHST6,MAPT,PDCD6IP,USH2A	4
Cellular Assembly and Organization,Cellular Function and Maintenance	Stabilization of microtubules	0.0316	MAPT	1
Molecular Transport,RNA Trafficking	Transport of mRNA	0.0325	MAPT	1
Neurological Disease,Organismal Injury and Abnormalities	Cerebral disorder	0.0325	MAPT,PDCD6IP,PER3,USH2A	4
Cancer,Gastrointestinal Disease,Organismal Injury and Abnormalities	Hepatobiliary carcinoma	0.0331	CHST6,GRHL2,MAPT,PDCD6IP,USH2A	5
Organismal Development	Lean body mass	0.0336	PER3	1
Cell Death and Survival,Cellular Compromise,Neurological Disease,Tissue Morphology	Neurodegeneration of axons	0.0336	MAPT	1
Cell Morphology,Organismal Injury and Abnormalities	Swelling of cells	0.0342	MAPT	1
Behavior	Exploratory behavior	0.0342	MAPT	1
Cancer,Organismal Injury and Abnormalities	Head and neck carcinoma	0.0344	CHST6,GRHL2,MAPT,P4HTM,PDCD6IP,PER3,USH2A	7
Cardiovascular System Development and Function,Organismal Development,Tissue Morphology	Density of blood vessel	0.0354	MAPT	1
Cell Morphology,Cellular Assembly and Organization,Cellular Development,Cellular Function and Maintenance,Cellular Growth and Proliferation,Embryonic Development,Nervous System Development and Function,Organismal Development,Tissue Development,Tissue Morphology	Density of dendritic spines	0.0356	MAPT	1
Nervous System Development and Function	Electrophysiology of eye	0.0359	USH2A	1
Cancer,Gastrointestinal Disease,Hepatic System Disease,Organismal Injury and Abnormalities	Bile duct carcinoma	0.0364	CHST6,PDCD6IP	2
Organismal Development	Growth of multicellular organism	0.0365	GRHL2	1
Cellular Development,Cellular Growth and Proliferation,Nervous System Development and Function,Tissue Development	Outgrowth of axons	0.0371	MAPT	1
Respiratory System Development and Function	Development of respiratory tract	0.0377	GRHL2	1
Cancer,Gastrointestinal Disease,Hepatic System Disease,Organismal Injury and Abnormalities	Hepatobiliary system cancer	0.0377	CHST6,GRHL2,MAPT,PDCD6IP,USH2A	5
Cell Death and Survival,Renal and Urological System Development and Function	Cell viability of kidney cell lines	0.0385	MAPT	1
Cell Morphology,Cellular Assembly and Organization,Cellular Function and Maintenance,Nervous System Development and Function	Extension of axons	0.0388	MAPT	1
Nervous System Development and Function,Neurological Disease,Organ Morphology,Organismal Development,Organismal Injury and Abnormalities	Abnormal morphology of hippocampus	0.0391	PDCD6IP	1
Cell Cycle,Gene Expression	Binding of DNA endogenous promoter	0.0397	GRHL2	1
Cell Death and Survival	Apoptosis of neuroblastoma cell lines	0.0402	MAPT	1
Cell-To-Cell Signaling and Interaction,Hematological System Development and Function,Immune Cell Trafficking,Inflammatory Response,Nervous System Development and Function	Activation of microglia	0.0408	MAPT	1
Behavior,Nervous System Development and Function	Circadian rhythm	0.0419	PER3	1
Cancer,Dermatological Diseases and Conditions,Organismal Injury and Abnormalities	Skin squamous cell carcinoma	0.0435	CHST6,USH2A	2
Nervous System Development and Function,Skeletal and Muscular System Development and Function	Motor function	0.0442	MAPT	1
Neurological Disease,Organismal Injury and Abnormalities,Psychological Disorders	Sleep Disorders	0.0445	PER3	1
Embryonic Development,Organismal Development,Tissue Development,Tissue Morphology	Closure of neural tube	0.0448	GRHL2	1
Cell Signaling	Viral life cycle	0.0448	PDCD6IP	1
Behavior,Nervous System Development and Function	Spatial memory	0.0451	MAPT	1
Behavior	Spatial learning	0.0465	MAPT	1
Free Radical Scavenging	Production of superoxide	0.0465	MAPT	1
Infectious Diseases	Viral Infection	0.047	CHST6,PDCD6IP,PER3	3
Cellular Assembly and Organization	Transport of vesicles	0.0471	MAPT	1
Energy Production,Nucleic Acid Metabolism,Small Molecule Biochemistry	Synthesis of ATP	0.0471	MAPT	1
Cell Morphology,Cell-To-Cell Signaling and Interaction,Nervous System Development and Function	Plasticity of synapse	0.0485	MAPT	1
Cancer,Organismal Injury and Abnormalities	Extrapulmonary squamous cell carcinoma	0.0499	CHST6,MAPT,PER3,USH2A	4
Cell Death and Survival,Hair and Skin Development and Function	Cell viability of epithelial cell lines	0.0499	MAPT	1

## Sheet: STable30
Supplementary Table 30: Free Energy Difference (ΔΔG) caused by Mutations in Potential Causal Variants in Prioritized Genes
Gene	rsID	Amino acid change	ΔΔG (kcal/mol)
CHST6	rs201349198	Ala326Ser	1.06
CHST6	rs142097284	Val375Gly	0.87
CHST6	rs140699573	Gln331His	0.6
GRHL2	rs142411476	Arg183Gln	1.022
GRHL2	rs3779617	Val415Ile	-0.618
MAPT	rs76375268	Gly213Arg	3.16
MAPT	rs139796158	Ala118Gly	1
MAPT	rs143956882	Ser427Phe	-0.08
MAPT	rs63750191	Gln741Lys	-0.19
MAPT	rs73314997	Ser318Leu	-0.53
MAPT	rs63750072	Gln230Arg	2.51
P4HTM	rs140290144	Ile227Val	1.65
P4HTM	rs144279528	Asp386Asn	0.37
P4HTM	rs199611252	Arg273Trp	-1.18
PDCD6IP	rs145293758	Pro737Arg	11.29
PDCD6IP	rs200697599	Ile5Ser	4.1
PDCD6IP	rs62620697	Ala719Thr	1.63
PDCD6IP	rs199990824	Asp376Asn	-1.24
PER3	rs147327372	Thr519Ala	0.25
PER3	rs140974114	Ser751Asn	0.09
PER3	rs201841976	Arg493Cys	0.07
PER3	rs200140283	Ala681Gly	0.03
PER3	rs139315125	His416Arg	-0.06
PER3	rs77418803	Ser919L	-0.12
PER3	rs141154839	His984Tyr	-0.91
PER3	rs144178755	Thr1040Asn	-2.32
USH2A	rs554957414	Pro2329His	99.19
USH2A	rs201527662	Cys934Trp	3.04
USH2A	rs554957414	Pro2329Leu	15.92
USH2A	rs554957414	Pro2329Arg	20.44
USH2A	rs148135241	Ser1122Pro	23.89
USH2A	rs115403785	Pro3590Gln	0.85

## Sheet: STable31
Supplementary Table 31 : Potential Causal Variants in Genome-wide Significant Genes
Chr	Pos	rsID	Function	Gene	ExonicFunc.refGene	AA Change	SIFT_score	SIFT_converted_rankscore	SIFT_pred	Polyphen2_HVAR_rankscore	Polyphen2_HVAR_pred	MutationTaster_score	MutationTaster_converted_rankscore	MutationTaster_pred	FATHMM_score	FATHMM_converted_rankscore	FATHMM_pred
1	161182208	rs11576415	exonic	NDUFS2	nonsynonymous SNV	Pro352Ala	0.005	0.632	D	0.971	D	1	0.81	D	-2.64	0.902	D
1	161183500	rs541855577	exonic	NDUFS2	nonsynonymous SNV	Lys425Thr	0.001	0.784	D	0.643	D	1	0.81	D	-2.1	0.862	D
2	216964668	rs78272258	exonic	TMEM169	nonsynonymous SNV	Ser99Arg	0	0.912	D	0.715	D	1	0.479	D	.	.	.
3	38598036	rs754733108	exonic	SCN5A	nonsynonymous SNV	Tyr1445Asp	0	0.912	D	0.916	D	1	0.511	D	-4.37	0.985	D
3	38607989	rs199473600	exonic	SCN5A	nonsynonymous SNV	Val1251Met	0	0.912	D	0.774	D	0.989	0.408	D	-4.98	0.985	D
3	38616877	rs192379242	exonic	SCN5A	nonsynonymous SNV	Arg1193Trp	0.009	0.632	D	0.693	D	0.998	0.44	D	-1.84	0.842	D
3	183960671	rs186946267	exonic	ALG3	nonsynonymous SNV	Val105Phe	0.003	0.682	D	0.875	D	1	0.81	D	-2.18	0.867	D
3	183963134	rs200285629	exonic	ALG3	nonsynonymous SNV	Val362Phe	0.003	0.682	D	0.916	D	1	0.81	D	-2.33	0.879	D
6	131277390	rs144686133	exonic	EPB41L2	nonsynonymous SNV	Pro79Leu	0.002	0.912	D	0.916	D	1	0.588	D	-1.79	0.841	D
7	92164118	rs200432326	exonic	RBM48	nonsynonymous SNV	Arg284His	0	0.912	D	0.79	D	1	0.588	D	.	.	.
10	114286892	rs184549091	exonic	VTI1A	nonsynonymous SNV	Leu104Pro	0.022	0.486	D	0.649	D	1	0.81	D	.	.	.
12	2977870	rs143382475	exonic	FOXM1	nonsynonymous SNV	Glu235Asp	0.013	0.538	D	0.701	D	1	0.508	D	-3.13	0.935	D
16	569014	rs149968783	exonic	RAB11FIP3	nonsynonymous SNV	Arg571His	0.006	0.614	D	0.916	D	1	0.588	D	.	.	.
17	16852271	rs146436713	exonic	TNFRSF13B	nonsynonymous SNV	Gly76Arg	0	0.912	D	0.971	D	0.8	0.351	D	-4.74	0.981	D

## Sheet: STable32
Supplementary Table 32: Free Energy Difference (ΔΔG) caused by Mutations in Potential Causal Variants in Additional Candidate Genes
Gene	rsID	Amino acid change	ΔΔG (kcal/mol)
ALG3	rs186946267	Val105Phe	8.86
ALG3	rs200285629	Val362Phe	-2.54
EPB41L2	rs144686133	Pro79Leu	1.28
FOXM1	rs143382475	Glu235Asp	-0.4
NDUFS2	rs541855577	Lys425Thr	1.92
NDUFS2	rs11576415	Pro352Ala	2.95
RAB11FIP3	rs149968783	Arg571His	0.49
RBM48	rs200432326	Arg284His	0.53
SCN5A	rs754733108	Tyr1445His	0.74
SCN5A	rs199473600	Val1251Met	-1.42
SCN5A	rs192379242	Arg1193Trp	-1.12
SCN5A	rs754733108	Tyr1445Asp	-0.56
TMEM169	rs78272258	Ser99Arg	-0.71
TNFRSF13B	rs146436713	Gly76Ser	5.09
TNFRSF13B	rs146436713	Gly76Cys	3.6
TNFRSF13B	rs146436713	Gly76Arg	3.26
VTI1A	rs184549091	Leu104Pro	-1.34
