# Supplementary material for: Rare variant analyses across multiethnic cohorts identify novel genes for refractive error
Source: Research Square preprint supplement (doi:10.21203/rs.3.rs-846265/v1), 2021-09-03
Supplement: Supplementary file 5 [file a2282d82806873c25ef36ad4.docx]

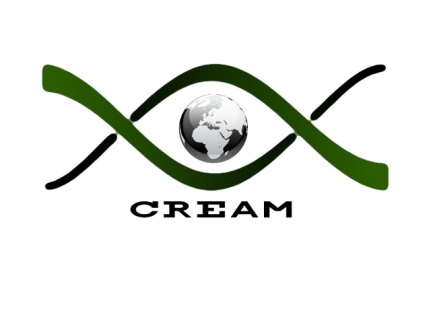
**The CREAM Consortium**

[Joan E. Bailey-Wilson](https://orcid.org/0000-0002-9153-2920)1, [Paul Nigel Baird](https://orcid.org/0000-0002-1305-3502)2, [Amutha Barathi Veluchamy](https://orcid.org/0000-0002-6477-9784)3-5, [Ginevra Biino](https://orcid.org/0000-0002-9936-946X)6, [Kathryn P. Burdon](https://orcid.org/0000-0001-8217-1249)7, [Harry Campbell](https://orcid.org/0000-0002-6169-6262)8, [Li Jia Chen](https://orcid.org/0000-0003-3500-5840)9, [Ching-Yu Cheng](https://orcid.org/0000-0003-0655-885X)10-12, [Emily Y. Chew](https://orcid.org/0000-0003-0999-9802)13, [Jamie E. Craig](https://orcid.org/0000-0001-9955-9696)14, [Phillippa M. Cumberland](https://orcid.org/0000-0002-3352-3014)15, [Margaret M. Deangelis](https://orcid.org/0000-0003-3731-142X)16, [Cécile Delcourt](https://orcid.org/0000-0002-2099-0481)17, [Xiaohu Ding](https://orcid.org/0000-0002-3385-6572)18, Priya Duggal19, [Cornelia M. van Duijn](https://orcid.org/0000-0002-2374-920)20, [David M. Evans](https://orcid.org/0000-0003-0663-4621)21-23, [Qiao Fan](https://orcid.org/0000-0002-2762-8346)24, [Maurizio Fossarello](https://orcid.org/0000-0003-1520-7760)25, [Paul J. Foster](https://orcid.org/0000-0002-4755-177X)26, [Puya Gharahkhani](https://orcid.org/0000-0002-4203-5952)27, [Adriana I. Iglesias](https://orcid.org/0000-0001-5532-764X)20,28,29, [Jeremy A. Guggenheim](https://orcid.org/0000-0001-5164-340X)30, [Xiaobo Guo](https://orcid.org/0000-0002-2972-3515)18,31, [Annechien E.G. Haarman](https://orcid.org/0000-0002-5486-9292)20,29, [Toomas Haller](https://orcid.org/0000-0002-5069-6523)32, [Christopher J. Hammond](ttps://orcid.org/0000-0002-3227-2620)33, [Xikun Han](https://orcid.org/0000-0002-3823-7308)27, [Caroline Hayward](https://orcid.org/0000-0002-9405-9550)34, [Mingguang He](https://orcid.org/0000-0002-6912-2810)2,18, [Alex W. Hewitt](https://orcid.org/0000-0002-5123-5999)2,7,35, [Quan V. Hoang](https://orcid.org/0000-0002-5486-9292)3,36 , [Pirro G. Hysi](https://orcid.org/0000-0001-5752-2510)33, [Robert P. Igo Jr.](https://orcid.org/0000-0002-0024-1993)37, [Sudha K. Iyengar](https://orcid.org/0000-0001-7488-250X)37-39, [Jost B. Jonas](https://orcid.org/0000-0003-2972-5227)40,41, [Mika Kähönen](https://orcid.org/0000-0002-4510-7341)42,43, [Jaakko Kaprio](https://orcid.org/0000-0002-3716-2455)44,45, , [Anthony P. Khawaja](https://orcid.org/0000-0001-6802-8585)26,46, [Caroline C. W. Klaver](https://orcid.org/0000-0002-2355-5258)16,20,29,47, Alison P. Klein19, [Barbara E. Klein](https://orcid.org/0000-0003-2379-976X)48, [Ronald Klein](https://orcid.org/0000-0002-4428-6237)48, [Jonathan H. Lass](https://orcid.org/0000-0002-3289-3443)37,38, [Kris Lee](https://orcid.org/0000-0002-9102-4627)48, [Terho Lehtimäki](https://orcid.org/0000-0002-2555-4427)49,50, [Deyana Lewis](https://orcid.org/0000-0003-0824-0773)1, [Qing Li](https://orcid.org/0000-0003-0660-8335)51, [Shi-Ming Li](https://orcid.org/0000-0003-2828-3260)41, [Leo-Pekka Lyytikäinen](https://orcid.org/0000-0002-7200-5455)49,50, [Stuart MacGregor](https://orcid.org/0000-0001-6731-8142)27, [David A. Mackey](https://orcid.org/0000-0001-7914-4709)2,7,35, [Nicholas G. Martin](https://orcid.org/0000-0003-4069-8020)52, [Akira Meguro](https://orcid.org/0000-0002-9797-0948)53, [Andres Metspalu](https://orcid.org/0000-0002-3718-796X)32[, Candace Middlebrooks](https://orcid.org/0000-0002-6118-0549)1, [Masahiro Miyake](https://orcid.org/0000-0001-7410-3764)54, [Nobuhisa Mizuki](file:///\\storage\v\vcl01\oogk\Data\RESEARCH\Klaver\CREAM\CREAM%20members\update%20VJMV%202020\0000-0003-3738-8777)53, [Anthony Musolf](https://orcid.org/0000-0002-7290-483X)1, [Stefan Nickels](https://orcid.org/0000-0003-0415-2354)55, [Konrad Oexle](https://orcid.org/0000-0001-7447-2252)56, [Chi Pui Pang](https://orcid.org/0000-0002-7764-6382)9, [Olavi Pärssinen](https://orcid.org/0000-0002-2976-8174)57,58, [Andrew D. Paterson](https://orcid.org/0000-0002-9169-118X)59, Craig Pennell35, [Norbert Pfeiffer](https://orcid.org/0000-0002-5766-2617)55, [Ozren Polasek](http://orcid.org/0000-0002-5765-1862)60,61, [Jugnoo S. Rahi](https://orcid.org/0000-0002-5718-9209)15,26,62, [Olli Raitakari](https://orcid.org/0000-0001-9365-3702)63,64, [Igor Rudan](https://orcid.org/0000-0001-6993-6884)8, [Srujana Sahebjada](https://orcid.org/0000-0002-1945-7209)2, [Seang-Mei Saw](https://orcid.org/0000-0001-7166-796X)65,66, [Dwight Stambolian](https://orcid.org/0000-0002-2733-2916)67, [Claire L. Simpson](https://orcid.org/0000-0003-2244-7690)1,68, [E-Shyong Tai](https://orcid.org/0000-0003-2929-8966)66, [Milly S. Tedja](https://orcid.org/0000-0003-0356-9684)20,29, [J. Willem L. Tideman](https://orcid.org/0000-0002-3042-8783)20,29, [Akitaka Tsujikawa](https://orcid.org/0000-0003-0779-7799)54, [Virginie J.M. Verhoeven](https://orcid.org/0000-0001-7359-7862)20,28,29, [Veronique Vitart](https://orcid.org/0000-0002-4991-3797)34, [Ningli Wang](https://orcid.org/0000-0002-8933-4482)41,  [Juho Wedenoja](http://orcid.org/0000-0002-6155-0378)44,69, [Wen Bin Wei](https://orcid.org/0000-0001-7983-8241)70, [Cathy Williams](https://orcid.org/0000-0002-9133-2021)23, [Katie M. Williams](https://orcid.org/0000-0003-4596-3938)33, [James F. Wilson](https://orcid.org/0000-0001-5751-9178)8,34, [Robert Wojciechowski](https://orcid.org/0000-0002-9593-4652)1,19,71, [Ya Xing Wang](https://orcid.org/0000-0003-2749-7793)41, [Kenji Yamashiro](https://orcid.org/0000-0001-9354-8558)72, [Jason C. S. Yam](https://orcid.org/0000-0002-2156-1486)9, [Maurice K.H. Yap](https://orcid.org/0000-0003-4687-4101)73, [Seyhan Yazar](https://orcid.org/0000-0003-0994-6196)35, [Shea Ping Yip](https://orcid.org/0000-0002-2170-8185)74, [Terri L. Young](https://orcid.org/0000-0001-6994-9941)48, [Xiangtian Zhou](https://orcid.org/0000-0002-1115-561X)75

**Affiliations**

1. Computational and Statistical Genomics Branch, National Human Genome Research Institute, National Institutes of Health, Bethesda, Maryland, USA.

2. Centre for Eye Research Australia, Ophthalmology, Department of Surgery, University of Melbourne, Royal Victorian Eye and Ear Hospital, Melbourne, Australia.

3. Singapore Eye Research Institute, Singapore National Eye Centre, Singapore.

4. Duke-NUS Medical School, Singapore, Singapore.

5. Department of Ophthalmology, National University Health Systems, National University of Singapore, Singapore.

6. Institute of Molecular Genetics, National Research Council of Italy, Pavia, Italy.

7. Department of Ophthalmology, Menzies Institute of Medical Research, University of Tasmania, Hobart, Australia.

8. Centre for Global Health Research, Usher Institute for Population Health Sciences and Informatics, University of Edinburgh, Edinburgh, UK.

9. Department of Ophthalmology and Visual Sciences, The Chinese University of Hong Kong, Hong Kong Eye Hospital, Kowloon, Hong Kong.

10. Department of Ophthalmology, Yong Loo Lin School of Medicine, National University of Singapore, Singapore.

11. Ocular Epidemiology Research Group, Singapore Eye Research Institute, Singapore National Eye Centre, Singapore.

12. Ophthalmology & Visual Sciences Academic Clinical Program (Eye ACP), Duke-NUS Medical School, Singapore.

13. Division of Epidemiology and Clinical Applications, National Eye Institute/National Institutes of Health, Bethesda, USA.

14. Department of Ophthalmology, Flinders University, Adelaide, Australia.

15. Great Ormond Street Institute of Child Health, University College London, London, UK.

16. Institute for Molecular and Clinical Ophthalmology, Basel, Switzerland.

17. Université de Bordeaux, Inserm, Bordeaux Population Health Research Center, team LEHA, UMR 1219, F-33000 Bordeaux, France.

18. State Key Laboratory of Ophthalmology, Zhongshan Ophthalmic Center, Sun Yat-sen University, Guangzhou, China.

19. Department of Epidemiology and Medicine, Johns Hopkins Bloomberg School of Public Health, Baltimore, Maryland, USA.

20. Department of Epidemiology, Erasmus Medical Center, Rotterdam, The Netherlands.

21. Translational Research Institute, University of Queensland Diamantina Institute, Brisbane, Queensland, Australia.

22. MRC Integrative Epidemiology Unit, University of Bristol, Bristol, UK.

23. Department of Population Health Sciences, Bristol Medical School, Bristol, UK.

24. Centre for Quantitative Medicine, DUKE-National University of Singapore, Singapore.

25. University Hospital 'San Giovanni di Dio', Cagliari, Italy.

26. NIHR Biomedical Research Centre, Moorfields Eye Hospital NHS Foundation Trust and UCL Institute of Ophthalmology, London, UK.

27. Statistical Genetics, QIMR Berghofer Medical Research Institute, Brisbane, Australia.

28. Department of Clinical Genetics, Erasmus Medical Center, Rotterdam, The Netherlands.

29. Department of Ophthalmology, Erasmus Medical Center, Rotterdam, The Netherlands.

30. School of Optometry & Vision Sciences, Cardiff University, Cardiff, UK.

31. Department of Statistical Science, School of Mathematics, Sun Yat-Sen University, Guangzhou, China.

32. Institute of Genomics, University of Tartu, Tartu, Estonia.

33. Section of Academic Ophthalmology, School of Life Course Sciences, King's College London, London, UK.

34. MRC Human Genetics Unit, MRC Institute of Genetics & Molecular Medicine, University of Edinburgh, Edinburgh, UK.

35. Centre for Ophthalmology and Visual Science, Lions Eye Institute, University of Western Australia, Perth, Australia.

36. Department of Ophthalmology, Columbia University, New York, USA.

37. Department of Population and Quantitative Health Sciences, Case Western Reserve University, Cleveland, Ohio, USA.

38. Department of Ophthalmology and Visual Sciences, Case Western Reserve University and University Hospitals Eye Institute, Cleveland, Ohio, USA.

39. Department of Genetics, Case Western Reserve University, Cleveland, Ohio, USA.

40. Department of Ophthalmology, Medical Faculty Mannheim of the Ruprecht-Karls-University of Heidelberg, Mannheim, Germany.

41. Beijing Tongren Eye Center, Beijing Tongren Hospital, Beijing Institute of Ophthalmology, Beijing Key Laboratory of Ophthalmology and Visual Sciences, Capital Medical University, Beijing, China.

42. Department of Clinical Physiology, Tampere University Hospital and School of Medicine, University of Tampere, Tampere, Finland.

43. Finnish Cardiovascular Research Center, Faculty of Medicine and Life Sciences, University of Tampere, Tampere, Finland.

44. Department of Public Health, University of Helsinki, Helsinki, Finland.

45. Institute for Molecular Medicine Finland FIMM, HiLIFE Unit, University of Helsinki, Helsinki, Finland.

46. Department of Public Health and Primary Care, University of Cambridge, Cambridge, UK.

47. Department of Ophthalmology, Radboud University Medical Center, Nijmegen, The Netherlands.

48. Department of Ophthalmology and Visual Sciences, University of Wisconsin–Madison, Madison, Wisconsin, USA.

49. Department of Clinical Chemistry, Finnish Cardiovascular Research Center-Tampere, Faculty of Medicine and Life Sciences, University of Tampere.

50. Department of Clinical Chemistry, Fimlab Laboratories, University of Tampere, Tampere, Finland.

51. National Human Genome Research Institute, National Institutes of Health, Baltimore, USA.

52. Genetic Epidemiology, QIMR Berghofer Medical Research Institute, Brisbane, Australia.

53. Department of Ophthalmology, Yokohama City University School of Medicine, Yokohama, Kanagawa, Japan.

54. Department of Ophthalmology and Visual Sciences, Kyoto University Graduate School of Medicine, Kyoto, Japan.

55. Department of Ophthalmology, University Medical Center of the Johannes Gutenberg University Mainz, Mainz, Germany.

56. Institute of Neurogenomics, Helmholtz Zentrum München, German Research Centre for Environmental Health, Neuherberg, Germany.

57. Department of Ophthalmology, Central Hospital of Central Finland, Jyväskylä, Finland.

58. Gerontology Research Center, Faculty of Sport and Health Sciences, University of Jyväskylä, Jyväskylä, Finland.

59. Program in Genetics and Genome Biology, Hospital for Sick Children and University of Toronto, Toronto, Ontario, Canada.

60. Gen-info Ltd, Zagreb, Croatia. .

61. University of Split School of Medicine, Soltanska 2, Split, Croatia.

62. Ulverscroft Vision Research Group, University College London, London, UK.

63. Research Centre of Applied and Preventive Cardiovascular Medicine, University of Turku, Turku, Finland.

64. Department of Clinical Physiology and Nuclear Medicine, Turku University Hospital, Turku, Finland.

65. Myopia Research Group, Singapore Eye Research Institute, Singapore National Eye Centre, Singapore.

66. Saw Swee Hock School of Public Health, National University Health Systems, National University of Singapore, Singapore.

67. Department of Ophthalmology, University of Pennsylvania, Philadelphia, Pennsylvania, USA.

68. Department of Genetics, Genomics and Informatics, University of Tennessee Health Sciences Center, Memphis, Tenessee.

69. Department of Ophthalmology, University of Helsinki and Helsinki University Hospital, Helsinki, Finland.

70. Beijing Tongren Eye Center, Beijing Key Laboratory of Intraocular Tumor Diagnosis and Treatment, Beijing Ophthalmology & Visual Sciences Key Lab, Beijing Tongren Hospital, Capital Medical University, Beijing, China.

71. Wilmer Eye Institute, Johns Hopkins Medical Institutions, Baltimore, Maryland, USA.

72. Department of Ophthalmology, Otsu Red Cross Hospital, Nagara, Japan. .

73. Centre for Myopia Research, School of Optometry, The Hong Kong Polytechnic University, Hong Kong, Hong Kong.

74. Department of Health Technology and Informatics, The Hong Kong Polytechnic University, Hong Kong, Hong Kong.

75. School of Ophthalmology and Optometry, Eye Hospital, Wenzhou Medical University, China.
