# Supplementary material for: Rare variant analyses across multiethnic cohorts identify novel genes for refractive error
Source: Research Square preprint supplement (doi:10.21203/rs.3.rs-846265/v1), 2021-09-03
Supplement: Supplementary file 6 [file adf8962ea4444941d3122598.xlsx]

## Sheet: Content
Content
Supplementary Table 26A	Results of EMMAX VT analysis using all cohorts
Supplementary Table 26B	Results of EMMAX CMC, VT and ACAT analysis using different cohorts
Supplementary Table 26C	Results of EMMAX analysis using East-Asian combined cohort (EACC) only
Supplementary Table 26D	Look up of genes significant in EMMAX VT analysis using all cohorts
Supplementary Table 26E	Look up of genes significant in EMMAX CMC, VT and ACAT analyses using different cohorts
Supplementary Table 26F	Look up of genes significant in EMMAX analysis using East-Asian combined cohort (EACC) only

## Sheet: STable 26A - VT
Gene			Meta-analysis	Individual populations					Test	Internal replication		External replication UKBB		Expression					Biology		GWAS	Total	Drug
#Chr	Pos	Gene	Meta-pvalue	Asian-NT	EPICNorfolk	BDES	Indo-European	Raine	Present in	one cohort <=10-5 and the other p<0.05		UKBB - VT	UKBB - CMC	peripheral retina	foveal retina	developing retina (I)	developing retina (II)	Total(any of 4 models)	Ocular phenotype in mice (Mouse Genome Informatics and International Mouse Phenotyping Consortium databases)	Ocular phenotype in human (OMIM+ Disgenet)	(Hysi et al.)	Total 2 (internal replication, ACAT-all, expressiona adults (1x), OMIM/dysgenet, MGI, GWAS), max=7	drug targets
19	18497141	GDF15	5.12372e-09	0.2	0.99	NA	2e-07	3.4e-05	ACAT-all, CMC	1	1	0.22	0.391826					0		1	0	3	x
19	40947696	SERTAD3	1e-07	1e-07	NA	NA	NA	NA				0.29	0.384153					0			0	0	x
5	71516912	MRPS27	1.00661e-07	0.78	7.6e-06	0.32	0.75	3.1e-06		1		0.85	0.928476					0			1	2
3	33877626	PDCD6IP	1.06866e-07	0.00041	NA	NA	1.3e-05	NA	ACAT-all, CMC	1	1	0.26	0.0887026	1				1		1	0	4	x
7	92161827	RBM48	1.73552e-07	0.0016	0.67	0.15	0.52	1e-07		1		0.24	0.0750476					0			0	1	x
20	57875916	EDN3	2e-07	NA	NA	NA	2e-07	NA				0.76	0.469908	1				1		1	0	2	x
18	2616457	NDC80	2.57087e-07	0.83	0.2	0.29	0.00046	6e-07		1		0.99	0.702697					0			0	1	x
11	70118372	PPFIA1	3.1791e-07	0.36	1e-07	0.14	0.0044	0.77		1		0.55	0.219993					0			0	1
8	41504105	NKX6-3	3.21131e-07	0.17	NA	NA	1e-07	NA				0.61	0.333009					0			0	0	x
12	123214166	HCAR1	3.90564e-07	3e-07	0.57	0.49	0.05	0.0052		1		0.48	0.419382					0		1	0	2	x
16	511421	RAB11FIP3	3.93604e-07	1e-07	NA	0.12	0.0157	0.97		1		0.27	NA					0			0	1	x
18	13001512	CEP192	5.64922e-07	1e-07	0.0057	0.45	0.47	0.28				0.41	0.68228					0	1		0	1	x
1	77528749	ST6GALNAC5	5.84241e-07	0.32	NA	NA	1e-07	NA	ACAT-all, CMC		1	0.59	0.44972	1		1	1	1			0	2	x
2	238475278	PRLH	6.53031e-07	0.36	NA	NA	1e-07	NA	ACAT-all		1	0.78	0.55652					0			0	1	x
10	38241067	ZNF25	7e-07	7e-07	NA	NA	NA	NA				0.57	0.541162					0			0	0
9	104238467	TMEM246	7.38397e-07	1e-07	NA	NA	0.41	NA				NA	NA	1	1	1	1	1			0	1	x
22	36623920	APOL2	8.38018e-07	0.22	NA	0.11	1.2e-05	0.0015		0		0.21	0.973293					0			0	0	x
17	44039717	MAPT	8.56832e-07	0.19	0.039	0.44	0.17	1e-07		1		0.16	0.103139	1	1	1	1	1	1	1	0	4	x
2	10262920	RRM2	8.80754e-07	NA	NA	0.27	0.0088	1.8e-06	ACAT-all, CMC	1	1	0.52	0.440153					0		1	0	3	x
16	75512672	CHST6	8.99467e-07	0.56	0.092	0.0095	2e-07	0.6		1		0.72	0.722983					0	1	2	0	4	x
11	57479507	MED19	1.12013e-06	NA	0.015	0.41	0.99	1e-07		1		0.68	0.729269	1		1	1	1			0	2	x
9	131085320	COQ4	1.22895e-06	0.0065	0.77	0.24	0.71	1e-07				0.95	0.775093					0			0	0
8	102555474	GRHL2	1.42444e-06	NA	0.38	0.86	0.0082	3e-07		1		0.96	0.62392					0	1	2	0	4	x
3	58419529	PDHB	1.43627e-06	0.83	NA	NA	1e-07	NA				0.055	0.72189	1	1	1	1	1			0	1	x
12	86198935	RASSF9	1.47936e-06	0.44	0.61	0.31	0.0128	1e-07		1		0.13	0.728458					0			0	1
19	47767890	CCDC9	1.65003e-06	0.033	0.67	0.034	0.085	1.9e-06		1		0.46	0.432803					0			0	1
12	674486	NINJ2	1.73766e-06	NA	0.63	0.017	0.045	2.1e-06		1		0.12	0.223546					0			0	1
1	162535958	UAP1	2.27769e-06	0.65	0.43	0.032	0.2	1e-07		1		0.059	0.308248					0			0	1	x
19	12995797	KLF1	2.4e-06	NA	2.4e-06	NA	NA	NA	CMC		1	NA	NA					0		1	0	2	x
2	120776731	EPB41L5	2.46669e-06	0.65	0.81	0.022	0.17	1e-07		1		0.29	0.678538					0	1		0	2	x
19	5783323	PRR22	3.39845e-06	0.07	0.015	0.39	0.59	1.2e-06		1		0.58	0.824997					0			0	1	x
7	127343354	SND1	3.4926e-06	0.86	0.076	0.0051	0.29	3.1e-06	CMC	1	1	0.18	0.941233					0		1	0	3	x
8	11607635	GATA4	3.5543e-06	0.41	0.063	0.15	1e-07	0.79		1		0.36	0.312085					0		1	0	2	x
6	131179302	EPB41L2	3.6316e-06	0.21	0.068	0.22	1	1e-07		1		0.82	0.608277	1	1	1	1	1			0	2	x
12	2967949	FOXM1	4.05828e-06	0.102	0.87	0.27	0.15	1e-07	CMC	1	1	0.83	0.283477					0		1	0	3	x
18	11851686	CHMP1B	4.2e-06	NA	NA	NA	4.2e-06	NA				0.66	0.467438		1			1		1	0	2	x
22	37420713	MPST	4.28563e-06	0.33	NA	0.86	2e-07	0.051		1		0.49	0.42598					0			0	1	x
9	125796939	GPR21	4.60225e-06	0.51	0.53	NA	1e-07	NA				0.69	0.311484					0			0	0	x
9	26978157	IFT74	6.56912e-06	1e-07	NA	0.7	0.22	0.31				0.52	0.155513					0		1	0	1	x
19	12637322	ZNF564	6.83142e-06	1.3e-05	NA	0.072	0.045	NA	CMC	1	1	0.14	0.0494582					0			0	2
2	234178662	ATG16L1	6.93515e-06	0.34	NA	0.18	7e-07	NA	ACAT-all		1	0.49	0.890769					0		1	0	2	x
1	155240602	CLK2	8.42877e-06	NA	0.025	0.54	0.79	6e-07		1		0.29	0.26171					0			0	1	x
7	99217536	ZNF498	9.42155e-06	0.24	0.96	0.75	0.058	1e-07				NA	NA	NA	NA	NA	NA	NA			0	0	x

## Sheet: STable 26B Other-test
Gene			Meta-analysis	Individual populations					Test	Internal replication		External replication UKBB		Expression							Biology		GWAS	Total	Drug
#Chr	Pos	Gene	Meta-pvalue	Asian	EPICNorfolk	BDES	Indo-European	Raine	welke test significant	one cohort <=10-5 and the other p<0.05	Present in other test	VT	CMC	peripheral retina	foveal retina	Adult Retina (Cowan et al), retina =1 and/or foveal =1 --> 1 else > 0	developing retina (I)	developing retina (II)	Developing retina Cowan et al. Expression. Developing.1 =1 and/or developing.2 =1 --> 1 else > 0	Total Expression(any of 4)	Ocular phenotype in mice (Mouse Genome Informatics and International Mouse Phenotyping Consortium databases)	Ocular phenotype in human (OMIM+ Disgenet)	(Hysi et al.)	Total (internal replication, present in other test, expression(1x), OMIM/dysgenet, MGI, GWAS) max=7	Drug Target
19	8959693	MUC16	9.61e-10	0.103938	0.681784	0.112927	6.01e-12	0.426208	ACAT-all			0.82	0.408509			0			0	0		1	0	1	x
3	46414470	CCR5	4.56e-09	0.166811	0.329338	0.0623793	0.537158	6.62e-11	ACAT-all			0.88	0.500073			0			0	0	1	1	0	2	x
11	102562574	MMP27	1.96e-08	0.0879064	9.76e-10	0.9155	0.218839	0.03806	ACAT-all	1		0.87	0.675243			0			0	0			0	1	x
16	80646633	CDYL2	4.64e-07	0.572458	0.827781	0.761634	1.11e-10	0.667835	ACAT-all			0.98	0.691517			0			0	0			0	0	x
1	7845014	PER3	1.08e-06	0.116044	0.219013	0.480812	0.049848	1.2e-07	ACAT-all	1		0.59	0.299276	1	1	1			0	1	1	2	0	5	x
11	57177593	SLC43A3	1.39e-06	0.2387	NA	NA	4.58e-08	0.6503	ACAT-all			0.72	0.423377		1	1			0	1			0	1	x
1	153580072	S100A16	1.4e-06	0.0452442	0.7049	0.4795	5.15e-08	NA	ACAT-all, CMC	1	1	0.16	0.0648806	1	1	1	1	1	1	1			0	3	x
20	43353380	WISP2	1.94e-06	NA	0.07106	NA	1.61e-06	NA	ACAT-all			NA	NA			0			0	0			0	0	x
8	122626383	HAS2	2.61e-06	3.47e-07	NA	NA	0.4507	NA	ACAT-all			0.99	0.963538			0			0	0		1	0	1	x
12	50571691	LIMA1	2.63e-06	0.0149088	0.1526	NA	1.05e-06	0.6842	ACAT-all	1		0.55	0.292406	1	1	1	1	1	1	1			0	2	x
18	44057673	LOXHD1	2.68e-06	0.399962	7.23e-06	0.188041	0.00046028	0.87003	ACAT-all	1		0.48	0.486045			0			0	0		1	0	2	x
8	145223221	MROH1	3.65e-06	0.169588	0.77079	0.364291	0.43737	1.52e-08	ACAT-all			0.38	0.0769428			0			0	0			0	0	x
12	113587667	CFAP73	3.79e-06	NA	0.5647	0.7419	0.771695	7.76e-09	ACAT-all			0.75	0.514485			0			0	0			0	0
11	32953516	QSER1	3.98e-06	8.82e-08	0.415731	0.616487	0.033613	0.461348	ACAT-all	1		0.24	0.742221			0			0	0			0	1
11	63974995	FERMT3	4.03e-06	NA	0.2754	0.0546689	0.459895	3.89e-07	ACAT-all			0.45	0.136744	1		1			0	1			0	1	x
1	154309887	ATP8B2	4.69e-06	0.11834	0.171089	0.474056	0.132148	3.38e-07	ACAT-all			0.15	0.317156			0			0	0			0	0	x
13	31712572	HSPH1	5.04e-06	0.436909	0.57865	0.002358	0.245736	3.19e-06	ACAT-all	1		0.22	0.507818	1		1	1	1	1	1		1	0	3	x
19	6002790	RFX2	5.1e-06	0.281522	0.224501	0.157187	6.73e-08	0.709854	ACAT-all			0.54	0.841274			0			0	0			0	0	x
1	55118861	MROH7	6.57e-06	7.43e-09	0.170463	0.760171	0.805423	0.832014	ACAT-all			0.0089	0.616027			0			0	0			0	0	x
17	48941234	TOB1	6.82e-06	NA	0.6513	NA	6.69e-07	NA	ACAT-all			0.75	0.835417	1	1	1		1	1	1			0	1	x
4	7776469	AFAP1	9.01e-06	1.63e-05	0.51751	0.9977	0.00107823	0.1046	ACAT-all	1		0.94	0.348062			0			0	0		1	0	2	x
5	37121749	C5orf42	9.91e-06	0.959332	0.165404	0.507687	2.4e-08	0.551538	ACAT-all			NA	NA			0			0	0	1	1	0	2
14	56763840	PELI2	3.38e-06	0.13838	0.701057	0.007539	1.97e-06	0.7892	ACAT-eur	1		0.11	0.0792435			0			0	0			0	1	x
4	85617141	WDFY3	3.68e-06	7.55e-09	0.984079	0.350626	0.671354	0.810868	ACAT-eur			0.012	0.0661311			0			0	0			0	0	x
20	62292793	RTEL1	3.83e-06	2.27e-06	0.320768	0.578701	0.986698	0.00404327	ACAT-eur	1		0.29	0.746211			0			0	0		1	0	2	x
2	216960759	TMEM169	4.07e-06	4.76e-08	0.831024	0.879119	0.996873	0.0502673	ACAT-eur			0.0079	0.0731379			0			0	0			0	0
7	716867	PRKAR1B	4.18e-06	0.845765	0.2149	0.84931	9.62e-08	0.124926	ACAT-eur			0.9	0.328284	1	1	1			0	1			0	1	x
3	178922361	PIK3CA	7.15e-06	0.296655	0.00142181	0.326618	0.13691	0.000106988	ACAT-eur, VT-EUR, CMC		1	1	0.810948			0			0	0	1	1	0	3	x
11	43905557	ALKBH3	8.88e-06	0.803237	0.00270162	0.216706	4.44e-06	0.976974	ACAT-eur	1		0.23	0.589045			0			0	0			0	1	x
19	54818721	LILRA5	1.90453e-06		NA	NA	0.56	2e-07	VT-eur			0.14	0.0332899	1	1	1			0	1			0	1	x
2	217542888	IGFBP5	2.35927e-06		0.2	NA	0.64	1e-07	VT-eur			0.5	0.321483	1	1	1	1	1	1	1		1	0	2	x
1	186303520	TPR	3.84947e-06		0.76	0.14	0.0016	1.5e-05	VT-eur	1		0.43	0.869589	1	1	1	1	1	1	1	1		0	3	x
9	95608658	ZNF484	3.9453e-06		0.75	0.73	4e-07	0.012	VT-eur	1		0.43	0.564768			0			0	0			0	1
6	116442897	AL121963.1	5.26725e-06		0.07	0.47	8e-07	0.14	VT-eur			NA	NA			0			0	0			0	0
18	12262897	CIDEA	5.50151e-06		0.75	0.022	0.47	5e-07	VT-eur	1		0.19	0.732986			0			0	0	1		0	2	x
14	74401030	FAM161B	5.52148e-06		1e-07	0.59	0.44	0.15	VT-eur			0.39	0.815346			0			0	0			0	0
3	178922361	PIK3CA	6.1e-06		NA	NA	6.1e-06	NA	VT-eur, ACAT-EUR, CMC		1	1	0.810948			0			0	0	1	1	0	3	x
12	52681460	KRT81	6.16968e-06		0.32	0.77	0.18	1e-07	VT-eur	1		0.16	0.978991	1		1			0	1		1	0	3
19	36271139	ARHGAP33	6.55908e-06		0.68	0.73	0.0096	1e-06	VT-eur	1		0.39	0.290152			0			0	0	1		0	2	x
16	77850832	VAT1L	6.56249e-06		0.61	0.66	1e-07	NA	VT-eur		1	0.16	0.550743	1	1	1		1	1	1			0	2	x
17	74381555	SPHK1	7.8426e-06		0.3	0.71	0.0092	3e-06	VT-eur	1		0.71	0.217699	1		1			0	1		1	0	3	x
2	233986969	INPP5D	8.17733e-06		0.13	0.5	1e-07	0.95	VT-eur			0.17	0.452958			0			0	0		1	0	1
1	175130119	KIAA0040	8.51863e-06		1	NA	0.54	1e-07	VT-eur, CMC		1	0.93	0.916142			0			0	0			0	1
19	45810035	CKM	8.59971e-06		0.48	0.35	0.39	1e-07	VT-eur			0.16	0.249099			0			0	0			0	0	x
16	30774829	RNF40	9.42218e-06		1.2e-06	0.76	0.016	0.5	VT-eur	1		0.94	0.601803			0			0	0		1	0	2
19	47197177	PRKD2	1.02764e-06	0.06254	0.9862	0.5503	0.8019	2.53e-09	CMC-ALL, CMC-EUR			0.27	0.960044			0			0	0	8		0	0	x
2	48807796	STON1	7.62863e-06		0.05277	0.001386	0.003168	0.02456	CMC-EUR			0.023	0.438084			0			0	0			0	0	x

## Sheet: STable 26C EACC
Gene			Meta-analysis	Individual populations					Test	Internal replication		External replication UKBB		Expression					Biology		GWAS	Total	Drug
CHR	Gene	start	Meta-pvalue	EACC	EPICNorfolk	BDES	IECC	REHS		one cohort <=10-5 and the other p<0.05	In ACAT/VT AL/eur	VT	CMC	peripheral retina	foveal retina	developing retina (I)	developing retina (II)	Total(any of 4 models)	Ocular phenotype in mice (Mouse Genome Informatics and International Mouse Phenotyping Consortium databases)	Ocular phenotype in human (OMIM+ Disgenet)	(Hysi et al.)	Total (internal replication, other test, expression(1x), OMIM/dysgenet, MGI, GWAS) max=7	drug targets
1	S100PBP	33291818	3.098e-05	1e-07	0.3	0.56	0.74	0.35	VT			0.74	0.238494	0	0	0	0			1	0	1
1	ACTN2	236902672	5.42736e-05	1e-07	1	0.88	0.12	0.83	VT			0.71	0.170128	0	0	0	0				0	0	x
1	NDUFS2	161172233	7.51981e-05	1.1e-06	0.74	0.11	0.97	NA	VT			0.086	0.191932	1	1	1	1	1		1	0	2	x
1	GSTM5	110257814	0.000107266	1.9e-06	0.2	0.37	0.95	NA	VT		1	0.87	0.971966	1	1	0	0	1		1	0	3	x
2	BCS1L	219526649	0.00254606	1.8e-06	0.95	0.92	0.88	0.96	VT			0.42	0.732921	0	0	0	0			1	0	1
3	P4HTM	49039984	1.64538e-05	1e-07	0.51	0.29	0.24	0.56	VT			0.016	0.00109235	1	1	1	1	1	1	2	0	4	x
3	ALG3	183960671	9.41157e-05	1e-07	0.63	0.64	0.5	0.87	VT			0.66	0.849718	0	0	0	0			1	0	1	x
3	CLDN18	137742541	0.000146734	6.5e-06	0.83	0.59	0.019	0.51	VT			0.59	0.228654	0	0	0	0				0	0
4	ZNF141	366594	0.000248418	1e-07	0.87	1	0.86	0.81	VT			0.61	0.962158	0	0	0	0				0	0	x
6	TTK	80717676	2.76627e-05	1e-07	0.78	0.43	0.23	0.49	VT			0.24	0.0402735	0	0	0	0			1	0	1	x
7	SLC13A1	122755609	0.000330399	3.9e-06	0.12	0.51	0.54	0.68	VT			0.0095	0.956906	0	0	0	0				0	0	x
7	THSD7A	11500346	0.000607295	5.1e-06	0.39	0.14	0.84	0.83	VT			0.65	0.993376	1	1	1	1	1	1	1	0	3
9	OR13C5	107360769	1.79044e-05	1e-07	0.22	NA	0.77	0.92	VT			0.17	0.452071	0	0	0	0				0	0
9	IFT74	26978157	6.56912e-06	1e-07	NA	0.7	0.22	0.31	VT			0.52	0.155513	0	0	0	0			1	0	1	x
9	TMEM246	104238467	7.38397e-07	1e-07	NA	NA	0.41	NA	VT			NA	NA	1	1	1	1	1			0	1	x
9	C9orf156	100672338	0.000249077	2e-07	0.86	0.61	0.63	0.92	VT			NA	NA	NA	NA	NA	NA				0	0	x
9	FRMD3	85863069	0.000905166	6e-07	0.94	0.79	0.83	0.89	VT			0.15	0.274408	1	1	1	0	1		1	0	2	x
9	ATP6V1G1	117354865	0.000396416	2.8e-06	NA	0.65	0.43	0.85	VT			0.52	0.948194	1	1	1	1	1			0	1	x
9	GLT6D1	138516119	0.000477467	6.1e-06	0.31	0.8	0.24	0.39	VT			0.88	0.933772	0	0	0	0				0	0	x
10	ZNF25	38241067	7e-07	7e-07	NA	NA	NA	NA	VT			0.57	0.541162	0	0	0	0				0	0
11	ESAM	124623558	5.15019e-05	1e-07	0.87	0.88	0.67	0.16	VT			0.83	0.690056	1	1	1	1	1			0	1	x
11	WEE1	9606879	0.000254968	5.5e-06	0.83	NA	0.58	NA	VT		1	0.74	0.450264	0	0	1	1	1		1	0	3	x
12	HCAR1	123214166	3.90564e-07	3e-07	0.57	0.49	0.05	0.0052	VT	1		0.48	0.419382	0	0	0	0			1	0	2	x
14	ALDH6A1	74535660	0.000177261	3e-07	0.58	0.36	0.95	0.66	VT			0.088	0.664818	1	1	0	0	1		1	0	2	x
16	RAB11FIP3	511421	3.93604e-07	1e-07	NA	0.12	0.0157	0.97	VT	1		0.27	NA	0	0	0	0				0	1	x
17	CLEC10A	6978452	2.24759e-05	2e-07	0.27	0.32	0.19	0.89	VT			0.82	0.699783	1	0	0	0	1			0	1	x
17	TTLL6	46847364	5.89825e-05	3e-07	0.54	0.52	0.77	0.15	VT		1	0.47	0.789388	0	0	0	0				0	1
18	CEP192	13001512	5.64922e-07	1e-07	0.0057	0.45	0.47	0.28	VT			0.41	0.68228	0	0	0	0		1		0	1	x
19	SERTAD3	40947696	1e-07	1e-07	NA	NA	NA	NA	VT			0.29	0.384153	0	0	0	0				0	0	x
19	C5AR1	47823038	0.00119454	1.5e-06	0.57	0.83	0.92	0.73	VT			0.0017	0.784127	1	1	0	0	1		1	0	2	x
20	KIF3B	30898131	9.34926e-05	8e-07	NA	0.24	0.64	0.92	VT			0.22	0.126069	0	0	0	0			1	0	1	x
1	MROH7	55107459	6.57e-06	7.43e-09	0.170463	0.760171	0.805423	0.832014	ACAT			0.0089	0.616027	0	0	0	0				0	0	x
1	USH2A	215799170	1.25e-05	7.55e-09	0.984079	0.350626	0.671354	0.810868	ACAT			0.72	0.557633	1	1	0	0	1	1	2	0	4	x
17	TNFRSF13B	16842985	1.48e-05	4.76e-08	0.831024	0.879119	0.996873	0.0502673	ACAT			0.43	0.537959	0	0	0	0			1	0	1	x
11	QSER1	32953516	3.98e-06	8.82e-08	0.415731	0.616487	0.033613	0.461348	ACAT	1		0.24	0.742221	0	0	0	0				0	1
16	NLRC5	57059427	0.000117187	1.12e-07	0.3735	0.634299	0.993596	0.878577	ACAT			0.75	0.876854	0	0	0	0				0	0	x
2	TRPM8	234835179	4.66e-05	1.6e-07	0.2689	0.5207	0.420036	0.7697	ACAT			0.7	0.458422	0	0	0	0			1	0	1	x
6	GCNT2	10529218	3.44e-05	2.01e-07	0.413744	0.773234	0.0786442	0.980012	ACAT			0.68	0.780257	0	0	0	0			2	0	2	x
8	HAS2	122626383	2.61e-06	3.47e-07	NA	NA	0.4507	NA	ACAT			0.99	0.963538	0	0	0	0		1	1	0	2	x
2	TANK	162061198	6.02e-05	8.94e-07	0.225081	0.151669	0.847623	0.385902	ACAT			0.77	0.590351	0	0	0	0			1	0	1
1	GSTM5	110257814	5.48e-05	1.74e-06	0.2008	0.3123	0.543317	NA	ACAT		1	0.87	0.971966	1	1	0	0	1		1	0	3	x
6	CCDC170	151869451	1.44e-05	2.27e-06	0.320768	0.578701	0.986698	0.00404327	ACAT			0.016	0.00301797	0	0	0	0				1	1
10	SYNPO2L	75406617	0.000332552	2.46e-06	0.811623	0.298523	0.67069	0.2211	ACAT			0.12	0.318689	0	0	0	0				0	0
9	FBXW5	139835558	0.000875362	2.53e-06	0.900446	0.186219	0.922516	0.804405	ACAT			0.77	0.884447	0	0	0	0				0	0	x
2	PARD3B	205829944	0.00186281	2.98e-06	0.776755	0.754084	0.847738	0.5864	ACAT			0.41	0.681324	0	0	0	0		1		0	1	x
10	VTI1A	114220306	0.000134982	5.65e-06	NA	0.4267	0.5242	NA	ACAT			0.96	0.803539	0	0	0	0				0	0	x
11	WEE1	9606879	0.000314036	5.8e-06	0.8576	NA	0.6792	NA	ACAT		1	0.74	0.450264	0	0	1	1	1		1	0	3	x
3	CPB1	148545841	0.000149779	5.99e-06	0.333229	0.138407	0.172112	0.665915	ACAT			0.046	0.00390968	0	0	0	0			1	0	1	x
15	BUB1B	40462771	0.00182119	6.52e-06	0.980476	0.236774	0.750258	0.741016	ACAT			0.31	0.182251	0	0	0	0		1	2	0	3	x
1	SPOCD1	32256385	0.000264111	6.61e-06	0.5856	0.672606	0.0258706	0.973788	ACAT			0.94	0.70437	0	0	1	0	1		1	0	2	x
2	TRIP12	230632309	0.000547731	9.06e-06	0.474012	0.1113	0.488413	0.7261	ACAT			0.36	0.892376	0	0	0	0			1	0	1	x
3	SCN5A	38591853	4.6e-05	9.2e-06	0.778706	0.0682275	0.0158566	0.91818	ACAT			0.96	0.8365	0	0	0	0			1	0	1	x

## Sheet: STable 26D OMIM-VT
Gene	Meta-pvalue	MIM Number	Title	Cytogenetic Location	Genomic Coordinates (From NCBI/GRCh38)	phenotype	ocular phenotype	points
GDF15	5.12372e-09	605312	GROWTH/DIFFERENTIATION FACTOR 15; GDF15	19p13.11	19:18,382,169-18,389,175		no	0
SERTAD3	1e-07	612125	SERTA DOMAIN-CONTAINING PROTEIN 3; SERTAD3	19q13.2	19:40,440,842-40,444,334		no	0
MRPS27	1.00661e-07	611989	Mitochondrial ribosomal protein S27	5q13.2	5:72,219,402-72,320,239		no	0
PDCD6IP	1.06866e-07	608074	PROGRAMMED CELL DEATH 6-INTERACTING PROTEIN	3p22.3	3:33,798,629-33,869,702		no	0
RBM48	1.73552e-07	No match					no	0
EDN3	2e-07	131242	ENDOTHELIN 3	20q13.32	20:59,300,414-59,325,991	{Hirschsprung disease, susceptibility to, 4} 613712 AD; Central hypoventilation syndrome, congenital 209880 AD; Waardenburg syndrome, type 4B 613265 AD, AR	no	0
NDC80	2.57087e-07	607272	KINETOCHORE-ASSOCIATED PROTEIN 2; KNTC2 or HIGHLY EXPRESSED IN CANCER; HEC HEC1	18p11.32			no	0
PPFIA1	3.1791e-07	611054	PROTEIN-TYROSINE PHOSPHATASE, RECEPTOR-TYPE, F POLYPEPTIDE-INTERACTING PROTEIN ALPHA-1; PPFIA1	11q13.3	11:70,270,686-70,384,404		no	0
NKX6-3	3.21131e-07	610772	NK6 HOMEOBOX 3; NKX6-3	8p11.21	8:41,645,176-41,650,816		no	0
HCAR1	3.90564e-07	606923	HYDROXYCARBOXYLIC ACID RECEPTOR 1	12q24.31	12:122,726,075-122,730,843		no	0
RAB11FIP3	3.93604e-07	608738	RAB11 FAMILY-INTERACTING PROTEIN 3; RAB11FIP3	16p13.3	16:425,620-523,010		no	0
CEP192	5.64922e-07	616426	CENTROSOMAL PROTEIN, 192-KD; CEP192	18p11.21	18:12,991,300-13,125,052		no	0
ST6GALNAC5	5.84241e-07	610134	ST6 ALPHA-N-ACETYL-NEURAMINYL-2,3-BETA-GALACTOSYL-1,3-N-ACETYLGALACTOSAMINIDE ALPHA-2,6-SIALYLTRANSFERASE 5; ST6GALNAC5	1p31.1	1:76,867,448-77,069,166		no	0
PRLH	6.53031e-07	602663	PROLACTIN-RELEASING HORMONE; PRLH	2q37.3	2:237,566,573-237,567,174		no	0
ZNF25	7e-07	194528	ZINC FINGER PROTEIN 25; ZNF25	10p11.21	10:37,949,572-37,976,646		no	0
TMEM246	7.38397e-07	No match					no	0
APOL2	8.38018e-07	607252	APOLIPOPROTEIN L-II; APOL2	22q12.3	22:36,226,208-36,239,953	{Schizophrenia} 181500 AD	no	0
MAPT	8.56832e-07	157140	MICROTUBULE-ASSOCIATED PROTEIN TAU; MAPT	17q21.31	17:45,894,537-46,028,333	{Parkinson disease, susceptibility to} 168600 AD, Mu; Dementia, frontotemporal, with or without parkinsonism 600274 AD; Pick disease 172700 AD; Supranuclear palsy, progressive 601104 AD; Supranuclear palsy, progressive atypical 260540 AR	no	0
RRM2	8.80754e-07	180390	RIBONUCLEOTIDE REDUCTASE, M2 SUBUNIT; RRM2	2p25.1	2:10,122,567-10,211,009		no	0
CHST6	8.99467e-07	605294	CARBOHYDRATE SULFOTRANSFERASE 6; CHST6	16q23.1	16:75,472,041-75,495,440	Macular corneal dystrophy 217800 AR	Yes	1
MED19	1.12013e-06	612385	MEDIATOR COMPLEX SUBUNIT 19; MED19	11q12.1	11:57,703,708-57,712,322		no	0
COQ4	1.22895e-06	612898	COENZYME Q4; COQ4	9q34.11	9:128,322,485-128,334,071	Coenzyme Q10 deficiency, primary, 7 616276 AR	no	0
GRHL2	1.42444e-06	608576	GRAINYHEAD-LIKE 2; GRHL2	8q22.3	8:101,492,438-101,678,103	Corneal dystrophy, posterior polymorphous, 618031 AD; Deafness, autosomal dominant 28 608641 AD; Ectodermal dysplasia/short stature syndrome 616029 AR	Yes	1
PDHB	1.43627e-06	179060	PYRUVATE DEHYDROGENASE, BETA POLYPEPTIDE; PDHB	3p14.3	3:58,427,629-58,433,831	Pyruvate dehydrogenase E1-beta deficiency 614111	no	0
RASSF9	1.47936e-06	610383	RAS ASSOCIATION DOMAIN FAMILY, MEMBER 9; RASSF9	12q21.31	12:85,800,702-85,836,408		no	0
CCDC9	1.65003e-06	No match					no	0
NINJ2	1.73766e-06	607297	NERVE INJURY-INDUCED PROTEIN 2; NINJ2	12p13.33	12:564,295-663,444		no	0
UAP1	2.27769e-06	602862	UDP-N-ACETYLGLUCOSAMINE PYROPHOSPHORYLASE 1; UAP1	1q23.3	1:162,561,718-162,599,836		no	0
KLF1	2.4e-06	600599	KRUPPEL-LIKE FACTOR 1; KLF1	19p13.13	19:12,884,421-12,887,200	[Hereditary persistence of fetal hemoglobin] 613566; Blood group--Lutheran inhibitor 111150; Dyserythropoietic anemia, congenital, type IV 613673 AD	no	0
EPB41L5	2.46669e-06	611730	ERYTHROCYTE MEMBRANE PROTEIN BAND 4.1-LIKE 5; EPB41L5	2q14.2	2:120,013,031-120,179,118		no	0
PRR22	3.39845e-06	No match					no	0
SND1	3.4926e-06	602181	STAPHYLOCOCCAL NUCLEASE DOMAIN- AND TUDOR DOMAIN-CONTAINING PROTEIN 1; SND1	7q32.1	7:127,652,144-128,092,592		no	0
GATA4	3.5543e-06	600576	GATA-BINDING PROTEIN 4; GATA4	8p23.1	8:11,676,930-11,760,001	?Testicular anomalies with or without congenital heart disease 615542 AD; Atrial septal defect 2 607941 AD; Atrioventricular septal defect 4 614430 AD; Tetralogy of Fallot 187500 AD; Ventricular septal defect 1 614429 AD	no	0
EPB41L2	3.6316e-06	603237	ERYTHROCYTE MEMBRANE PROTEIN 4.1-LIKE 2; EPB41L2	6q23.1-q23.2	6:130,827,954-131,063,250		no	0
FOXM1	4.05828e-06	602341	FORKHEAD BOX M1; FOXM1	12p13.33	12:2,857,679-2,877,173		no	0
CHMP1B	4.2e-06	606486	CHMP FAMILY, MEMBER 1B; CHMP1B. Alternative titles; CHROMATIN-MODIFYING PROTEIN 1B; CHARGED; MULTIVESICULAR BODY PROTEIN 1B; CHROMOSOME 18 OPEN READING FRAME 2; C18ORF2	18p11.21	18:11,851,412-11,854,443		no	0
MPST	4.28563e-06	602496	MERCAPTOPYRUVATE SULFURTRANSFERASE; MPST	22q12.3	22:37,019,741-37,029,814		no	0
GPR21	4.60225e-06	601909	G PROTEIN-COUPLED RECEPTOR 21; GPR21	9q33.2	9:123,033,634-123,042,750		no	0
IFT74	6.56912e-06	608040	INTRAFLAGELLAR TRANSPORT 74; IFT74	9p21.2	9:26,947,109-27,066,133		no	0
ZNF564	6.83142e-06	No match					no	0
ATG16L1	6.93515e-06	610767	AUTOPHAGY 16-LIKE 1; ATG16L1	2q37.1	2:233,251,646-233,295,673	{Inflammatory bowel disease (Crohn disease) 10} 611081	no	0
CLK2	8.42877e-06	602989	CDC-LIKE KINASE 2; CLK2	1q22	1:155,262,867-155,273,503		no	0
ZNF498	9.42155e-06	No match

## Sheet: STable 26E OMIM-Other test
Gene	Meta-pvalue	MIM Number	Title	Cytogenetic Location	Genomic Coordinates (From NCBI/GRCh38)	phenotype	ocular phenotype	points
MUC16	9.61e-10	606154	OVARIAN CARCINOMA ANTIGEN CA125	19p13.2	19:8,848,839-9,010,389
CCR5	4.56e-09	601373	CHEMOKINE, CC MOTIF, RECEPTOR 5; CCR5	3p21.31	3:46,370,141-46,376,205	{Diabetes mellitus, insulin-dependent, 22} 612522 ; {Hepatitis C virus, resistance to} 609532; {HIV infection, susceptibility/resistance to} ; {West nile virus, susceptibility to} 610379	no
MMP27	1.96e-08	618101	MATRIX METALLOPROTEINASE 27; MMP27	11q22.2	11:102,690,942-102,705,784
CDYL2	4.64e-07	618816	CDY-LIKE PROTEIN 2; CDYL2	16q23.2	16:80,597,898-80,805,042
PER3	1.08e-06	603427	PERIOD CIRCADIAN REGULATOR 3; PER3	1p36.23	1:7,784,284-7,845,180	?Advanced sleep phase syndrome, familial 3 616882 AD	possibly (circadian rhytm)	1
SLC43A3	1.39e-06	618034	SOLUTE CARRIER FAMILY 43, MEMBER 3; SLC43A3	11q12.1	11:57,406,953-57,427,579
S100A16	1.4e-06	617437	S100 CALCIUM-BINDING PROTEIN A16; S100A16; AGING-ASSOCIATED GENE 13; AAG13	1q21.3	1:153,606,882-153,613,136
WISP2	1.94e-06	603399	WNT1-INDUCIBLE SIGNALING PATHWAY PROTEIN 2; WISP2; CCN FAMILY, MEMBER 5; CCN5	20q13.12	20:44,714,203-44,728,040
HAS2	2.61e-06	601636	HYALURONAN SYNTHASE 2; HAS2	8q24.13	8:121,612,115-121,641,439
LIMA1	2.63e-06	608364	LIM DOMAIN AND ACTIN-BINDING PROTEIN 1; LIMA1	12q13.12	12:50,175,779-50,283,519	[Low density lipoprotein cholesterol level QTL 8] 618079	no
LOXHD1	2.68e-06	613072	LIPOXYGENASE HOMOLOGY DOMAIN-CONTAINING 1; LOXHD1	18q21.1	18:46,476,960-46,657,219	Deafness, autosomal recessive 77, 613079, AR	no
MROH1	3.65e-06	not found
CFAP73	3.79e-06	602132	MIA SH3 DOMAIN ER EXPORT FACTOR 2; MIA2 ; MENINGIOMA-EXPRESSED ANTIGEN; MGEA; MENINGIOMA-EXPRESSED ANTIGEN 6; MGEA6; MEA6; MELANOMA INHIBITORY ACTIVITY PROTEIN 2; CUTANEOUS T-CELL LYMPHOMA-ASSOCIATED ANTIGEN 5; CTAGE5(gene cards alternative name)	14q21.1	14:39,233,914-39,388,521
QSER1	3.98e-06	not found
FERMT3	4.03e-06	607901	FERMITIN FAMILY, MEMBER 3; FERMT3; UNC112-RELATED PROTEIN 2; URP2; KINDLIN 3; KIND3; MIG2B	11q13.1	11:64,205,919-64,223,890	Leukocyte adhesion deficiency, type III 612840 AR	no
ATP8B2	4.69e-06	605867	ATPase, CLASS I, TYPE 8B, MEMBER 2; ATP8B2	1q21.3	1:154,325,524-154,351,303
HSPH1	5.04e-06	610703	HEAT-SHOCK 105/110-KD PROTEIN 1; HSPH1; HEAT-SHOCK PROTEIN, 105-KD; HSP105; HEAT-SHOCK PROTEIN, 110-KD; HSP110; KIAA0201	13q12.3	13:31,134,972-31,162,387
RFX2	5.1e-06	142765	REGULATORY FACTOR X, 2; RFX2; HLA CLASS II REGULATORY FACTOR RFX2	19p13.3	19:5,993,163-6,110,600
MROH7	6.57e-06	not found
TOB1	6.82e-06	605523	TRANSDUCER OF ERBB2, 1; TOB1	17q21.33	17:50,862,222-50,867,977
AFAP1	9.01e-06	608252	ACTIN FILAMENT-ASSOCIATED PROTEIN 1; AFAP1;AFAP, 110-KD; AFAP110	4p16.1	4:7,758,712-7,939,860
C5orf42	9.91e-06	614571	CILIOGENESIS AND PLANAR POLARITY EFFECTOR 1; CPLANE1; CHROMOSOME 5 OPEN READING FRAME 42; C5ORF42	5p13.2	5:37,063,927-37,249,498	Joubert syndrome 17 614615 AR; Orofaciodigital syndrome VI 277170 AR	abnormal eye movements with Joubert syndrome	1
PELI2	3.38e-06	614798	PELLINO E3 UBIQUITIN PROTEIN LIGASE 2; PELI2	14q22.3	14:56,118,328-56,301,585
WDFY3	3.68e-06	617485	WD REPEAT- AND FYVE DOMAIN-CONTAINING PROTEIN 3; WDFY3; AUTOPHAGY-LINKED FYVE PROTEIN; ALFY BLUE CHEESE, DROSOPHILA, HOMOLOG OF; BCHS	4q21.23	4:84,669,596-84,966,689	?Microcephaly 18, primary, autosomal dominant 617520 AD	no
RTEL1	3.83e-06	608833	REGULATOR OF TELOMERE ELONGATION HELICASE 1; RTEL1; NOVEL HELICASE-LIKE PROTEIN; NHL REGULATOR OF TELOMERE LENGTH; RTEL TELOMERE LENGTH REGULATOR; KIAA1088; CHROMOSOME 20 OPEN READING FRAME 41; C20ORF41	20q13.33	20:63,657,809-63,696,252	Dyskeratosis congenita, autosomal dominant 4 615190 AD, AR; Dyskeratosis congenita, autosomal recessive 5 615190 AD, AR; Pulmonary fibrosis and/or bone marrow failure, telomere-related, 3 616373 AD	no
TMEM169	4.07e-06	not found
PRKAR1B	4.18e-06	176911	PROTEIN KINASE, cAMP-DEPENDENT, REGULATORY, TYPE I, BETA; PRKAR1B; PROTEIN KINASE A, RI-BETA SUBUNIT; PRKAR1	7p22.3	7:549,184-727,675
PIK3CA	7.15e-06	171834	PHOSPHATIDYLINOSITOL 3-KINASE, CATALYTIC, ALPHA; PIK3CA; PHOSPHATIDYLINOSITOL 3-KINASE, CATALYTIC, 110-KD, ALPHA; p110-ALPHA; PIK3-ALPHA	3q26.32	3:179,148,113-179,240,092	Breast cancer, somatic 114480; CLAPO syndrome, somatic 613089; CLOVE syndrome, somatic 612918; Colorectal cancer, somatic 114500; Cowden syndrome 5 615108; Gastric cancer, somatic 613659; Hepatocellular carcinoma, somatic 114550; Keratosis, seborrheic, somatic 182000; Macrodactyly, somatic 155500; Megalencephaly-capillary malformation-polymicrogyria syndrome, somatic 602501; Nevus, epidermal, som…	no
ALKBH3	8.88e-06	610603	AlkB HOMOLOG 3, ALPHA-KETOGLUTARATE-DEPENDENT DIOXYGENASE; ALKBH3; AlkB, E. COLI, HOMOLOG OF, 3; PROSTATE CANCER ANTIGEN 1; PCA1; DEPC1; ABH3	11p11.2	11:43,880,830-43,920,273
LILRA5	1.90453e-06	606047	LEUKOCYTE IMMUNOGLOBULIN-LIKE RECEPTOR, SUBFAMILY A, MEMBER 5; LILRA5; LEUKOCYTE IMMUNOGLOBULIN-LIKE RECEPTOR 9; LIR9 IMMUNOGLOBULIN-LIKE TRANSCRIPT 11; ILT11; CD85F	19q13.42	19:54,307,069-54,313,165
IGFBP5	2.35927e-06	146734	INSULIN-LIKE GROWTH FACTOR-BINDING PROTEIN 5; IGFBP5	2q35	2:216,672,104-216,695,548
TPR	3.84947e-06	189940	TRANSLOCATED PROMOTER REGION; TPR	1q31.1	1:186,311,651-186,375,252
ZNF484	3.9453e-06	not found
AL121963.1	5.26725e-06	606573	FYN-RELATED KINASE; FRK; RAK GTK, MOUSE, HOMOLOG OF; GTK	6q22.1	6:115,931,148-116,100,738
CIDEA	5.50151e-06	604440	CELL DEATH-INDUCING DFFA-LIKE EFFECTOR A; CIDEA	18p11.21	18:12,254,360-12,277,594
FAM161B	5.52148e-06	not found
PIK3CA	6.1e-06	171834	PHOSPHATIDYLINOSITOL 3-KINASE, CATALYTIC, ALPHA; PIK3CA; PHOSPHATIDYLINOSITOL 3-KINASE, CATALYTIC, 110-KD, ALPHA; p110-ALPHA; PIK3-ALPHA	3q26.32	3:179,148,113-179,240,092	Breast cancer, somatic 114480; CLAPO syndrome, somatic 613089; CLOVE syndrome, somatic 612918; Colorectal cancer, somatic 114500; Cowden syndrome 5 615108; Gastric cancer, somatic 613659; Hepatocellular carcinoma, somatic 114550; Keratosis, seborrheic, somatic 182000; Macrodactyly, somatic 155500; Megalencephaly-capillary malformation-polymicrogyria syndrome, somatic 602501; Nevus, epidermal, som…	no
KRT81	6.16968e-06	602153	KERATIN 81, TYPE II; KRT81; K81; KB21; K2.9; KERATIN, HAIR, BASIC, 1; KRTHB1; KERATIN, HARD, TYPE II, 1; HB1	12q13.13	12:52,285,912-52,291,533	Monilethrix 158000 AD 3 KRT86 601928; 12q13.13 Monilethrix 158000 AD 3 KRT81 602153; 12q13.13 Monilethrix 158000 AD 3 KRT83	no
ARHGAP33	6.55908e-06	614902	RHO GTPase-ACTIVATING PROTEIN 33; ARHGAP33; TC10/CDC42 GTPase-ACTIVATING PROTEIN; TCGAP	19q13.12	19:35,775,514-35,788,821
VAT1L	6.56249e-06	607687	HIGH DENSITY LIPOPROTEIN CHOLESTEROL LEVEL QUANTITATIVE TRAIT LOCUS 3; HDLCQ3	16q24.1	16:84,100,000-87,000,000	{High density lipoprotein cholesterol, low serum, 3} 607687	no
SPHK1	7.8426e-06	603730	SPHINGOSINE KINASE 1; SPHK1	17q25.1	17:76,383,203-76,387,854
INPP5D	8.17733e-06	601582	INOSITOL POLYPHOSPHATE-5-PHOSPHATASE, 145-KD; INPP5D	2q37.1	2:233,060,341-233,207,902
KIAA0040	8.51863e-06	616696	KIAA0040 GENE; KIAA0040	1q25.1	1:175,156,985-175,193,294
CKM	8.59971e-06	123310	CREATINE KINASE, MUSCLE TYPE; CKM	19q13.32	19:45,306,412-45,322,874
RNF40	9.42218e-06	607700	RING FINGER PROTEIN 40; RNF40; BRE1, S. CEREVISIAE, HOMOLOG OF, B; BRE1B; SYNTAXIN 1-INTERACTING RING FINGER PROTEIN; STARING; RB1-BINDING PROTEIN, 95-KD; RBP95; KIAA0661	16p11.2	16:30,761,611-30,800,230
PRKD2	1.02764e-06	607074	PROTEIN KINASE D2; PRKD2	19q13.32	19:46,674,315-46,717,113
STON1	7.62863e-06	605357	STONIN 1; STON1	2p16.3	2:48,530,153-48,598,512

## Sheet: STable 26F OMIM-EACC
Gene	Meta-pvalue	Test	MIM Number	Title	Cytogenetic Location	Genomic Coordinates (From NCBI/GRCh38)	phenotype	ocular phenotype	points
S100PBP	3.098e-05	VT	611889	S100P-BINDING PROTEIN	1p35.1	1:32,816,766-32,858,878		no
ACTN2	5.42736e-05	VT	102573	ACTININ, ALPHA-2	1q43	1:236,686,498-236,764,630	Cardiomyopathy, dilated, 1AA, with or without LVNC 612158 AD; Cardiomyopathy, hypertrophic, 23, with or without LVNC 612158 AD; Myopathy, congenital with structured cores and Z-line abnormalities 618654 AD; Myopathy, distal, 6, adult onset 618655 AD	no
NDUFS2	7.51981e-05	VT	602985	NADH-UBIQUINONE OXIDOREDUCTASE Fe-S PROTEIN 2	1q23.3	1:161,197,416-161,214,394	Mitochondrial complex I deficiency, nuclear type 6 618228 AR	no
GSTM5	0.000107266	VT	138385	GLUTATHIONE S-TRANSFERASE, MU-5	1p13.3	1:109,711,750-109,718,267		no
BCS1L	0.00254606	VT	603647	BCS1 HOMOLOG, UBIQUINOL-CYTOCHROME C REDUCTASE COMPLEX CHAPERONE	2q35	2:218,659,682-218,663,442	Bjornstad syndrome 262000 AR; GRACILE syndrome 603358 AR; Mitochondrial complex III deficiency, nuclear type 1 124000 AR	no
P4HTM	1.64538e-05	VT	614584	PROLYL 4-HYDROXYLASE, TRANSMEMBRANE	3p21.31	3:48,989,907-49,007,152	Hypotonia, hypoventilation, impaired intellectual development, dysautonomia, epilepsy, and eye abnormalities 618493 AR	yes: variable ocular movement and visual abnormalities; Eye abnormalities included rotary nystagmus, myopia, hyperopia, astigmatism, strabismus, exotropia, achromic fundi, cortical blindness, and optic atrophy	1
ALG3	9.41157e-05	VT	608750	ALG3 ALPHA-1,3-MANNOSYLTRANSFERASE	3q27.1	3:184,242,300-184,258,300	Congenital disorder of glycosylation, type Id 601110 AR	no
CLDN18	0.000146734	VT	609210	CLAUDIN 18
ZNF141	0.000248418	VT	194648	ZINC FINGER PROTEIN 141	4p16.3	4:337,813-384,867	?Polydactyly, postaxial, type A6 615226 AR	no
TTK	2.76627e-05	VT	604092	TTK PROTEIN KINASE; MONOPOLAR SPINDLE 1-LIKE 1; MPS1L1; MPS1, YEAST, HOMOLOG OF; MPS1; PHOSPHOTYROSINE-PICKED THREONINE KINASE; PYT; ESK, MOUSE, HOMOLOG OF; ESK	6q14.1	6:80,004,146-80,042,650		no
SLC13A1	0.000330399	VT	606193	SOLUTE CARRIER FAMILY 13 (SODIUM/SULFATE SYMPORTER), MEMBER 1; SODIUM-INORGANIC SULFATE COTRANSPORTER 1; NASI1; NAS1	7q31.32	7:123,113,489-123,201,835
THSD7A	0.000607295	VT	612249	THROMBOSPONDIN TYPE-1 DOMAIN-CONTAINING PROTEIN 7A; THSD7A; KIAA0960	7p21.3	7:11,370,364-11,832,197
OR13C5	1.79044e-05	VT	not found
IFT74	6.56912e-06	VT	608040	INTRAFLAGELLAR TRANSPORT 74; IFT74	9p21.2	9:26,947,109-27,066,133		no
TMEM246	7.38397e-07	VT	not found
C9orf156	0.000249077	VT	NAP1:146930	INTERLEUKIN 8; IL8 Alternative titles; symbols SMALL INDUCIBLE CYTOKINE SUBFAMILY B, MEMBER 8; SCYB8 MONOCYTE-DERIVED NEUTROPHIL CHEMOTACTIC FACTOR NEUTROPHIL-ACTIVATING PEPTIDE 1; NAP1 GRANULOCYTE CHEMOTACTIC PROTEIN 1; GCP1 CHEMOKINE, CXC MOTIF, LIGAND 8; CXCL8	4q13.3	4:73,740,568-73,743,715
FRMD3	0.000905166	VT	607619	FERM DOMAIN-CONTAINING PROTEIN 3; FRMD3 Alternative titles; symbols NONERYTHROID PROTEIN 4.1, OVARY TYPE PROTEIN 4.1O EPB41LO	9q21.32	9:83,242,991-83,585,796
ATP6V1G1	0.000396416	VT	607296	ATPase, H+ TRANSPORTING, LYSOSOMAL, 13-KD, V1 SUBUNIT G, ISOFORM 1; ATP6V1G1	9q32	9:114,587,768-114,598,878
GLT6D1	0.000477467	VT	613699	GLYCOSYLTRANSFERASE 6 DOMAIN-CONTAINING 1; GLT6D1	9q34.3	9:135,623,647-135,641,223
ZNF25	7e-07	VT	194528	ZINC FINGER PROTEIN 25; ZNF25	10p11.21	10:37,949,572-37,976,646		no
ESAM	5.15019e-05	VT	614281	ENDOTHELIAL CELL ADHESION MOLECULE; ESAM	11q24.2	11:124,753,125-124,762,289
WEE1	0.000254968	VT	193525	WEE1 G2 CHECKPOINT KINASE; WEE1	11p15.4	11:9,573,669-9,589,984
HCAR1	3.90564e-07	VT	606923	HYDROXYCARBOXYLIC ACID RECEPTOR 1	12q24.31	12:122,726,075-122,730,843		no
ALDH6A1	0.000177261	VT	603178	ALDEHYDE DEHYDROGENASE 6 FAMILY, MEMBER A1; ALDH6A1	14q24.3	14:74,056,846-74,084,452	Methylmalonate semialdehyde dehydrogenase deficiency 614105 AR	no
RAB11FIP3	3.93604e-07	VT	608738	RAB11 FAMILY-INTERACTING PROTEIN 3; RAB11FIP3	16p13.3	16:425,620-523,010		no
CLEC10A	2.24759e-05	VT	605999	C-TYPE LECTIN DOMAIN FAMILY 10, MEMBER A; CLEC10A	17p13.1	17:7,074,536-7,080,306
TTLL6	5.89825e-05	VT	610849	TUBULIN TYROSINE LIGASE-LIKE FAMILY, MEMBER 6; TTLL6	17q21.32	17:48,762,233-48,817,246
CEP192	5.64922e-07	VT	616426	CENTROSOMAL PROTEIN, 192-KD; CEP192	18p11.21	18:12,991,300-13,125,052		no
SERTAD3	1e-07	VT	612125	SERTA DOMAIN-CONTAINING PROTEIN 3; SERTAD3	19q13.2	19:40,440,842-40,444,334		no
C5AR1	0.00119454	VT	113995	COMPLEMENT COMPONENT 5a RECEPTOR 1; C5AR1	19q13.32	19:47,309,860-47,322,065
KIF3B	9.34926e-05	VT	603754	KINESIN FAMILY MEMBER 3B; KIF3B	20q11.21	20:32,277,650-32,335,010	Retinitis pigmentosa 89 618955 AD	yes	1
MROH7	6.57e-06	ACAT	not found
USH2A	1.25e-05	ACAT	608400	USH2A GENE; USH2A	1q41	1:215,622,890-216,423,447	Retinitis pigmentosa 39 613809; Usher syndrome, type 2A 276901 AR	yes	1
TNFRSF13B	1.48e-05	ACAT	604907	TUMOR NECROSIS FACTOR RECEPTOR SUPERFAMILY, MEMBER 13B; TNFRSF13B	17p11.2	17:16,939,080-16,972,117	Immunodeficiency, common variable, 2 240500 AD, AR; Immunoglobulin A deficiency 609529	no
QSER1	3.98e-06	ACAT	not found
NLRC5	0.000117187	ACAT	613537	NLR FAMILY, CASPASE RECRUITMENT DOMAIN-CONTAINING 5; NLRC5	16q13	16:56,989,556-57,083,519
TRPM8	4.66e-05	ACAT	606678	TRANSIENT RECEPTOR POTENTIAL CATION CHANNEL, SUBFAMILY M, MEMBER 8; TRPM8	2q37.1	2:233,917,341-234,019,521
GCNT2	3.44e-05	ACAT	600429	GLUCOSAMINYL (N-ACETYL) TRANSFERASE 2, I-BRANCHING ENZYME; GCNT2	6p24.3-p24.2	6:10,521,282-10,629,367	[Blood group, Ii] 110800 AD; Adult i phenotype without cataract 110800 AD; Cataract 13 with adult i phenotype 116700 AR	yes: congenital cataract;	1
HAS2	2.61e-06	ACAT	601636	HYALURONAN SYNTHASE 2; HAS2	8q24.13	8:121,612,115-121,641,439
TANK	6.02e-05	ACAT	603893	TRAF FAMILY MEMBER-ASSOCIATED NF-KAPPA-B ACTIVATOR; TANK	2q24.2	2:161,136,962-161,236,229
GSTM5	5.48e-05	ACAT	138385	GLUTATHIONE S-TRANSFERASE, MU-5; GSTM5	1p13.3	1:109,711,750-109,718,267
CCDC170	1.44e-05	ACAT	not found
SYNPO2L	0.000332552	ACAT	not found
FBXW5	0.000875362	ACAT	609072	F-BOX AND WD40 DOMAIN PROTEIN 5; FBXW5	9q34.3	9:136,940,434-136,944,773
PARD3B	0.00186281	ACAT	not found
VTI1A	0.000134982	ACAT	614316	VTI1, S. CEREVISIAE, HOMOLOG OF, A; VTI1A	10q25.2	10:112,446,987-112,855,367
WEE1	0.000314036	ACAT	193525	WEE1 G2 CHECKPOINT KINASE; WEE1	11p15.4	11:9,573,669-9,589,984
CPB1	0.000149779	ACAT	114852	CARBOXYPEPTIDASE B1, TISSUE; CPB1	3q24	3:148,827,810-148,860,186
BUB1B	0.00182119	ACAT	602860	BUB1 MITOTIC CHECKPOINT SERINE/THREONINE KINASE B; BUB1B	15q15.1	15:40,161,068-40,221,122	[Premature chromatid separation trait] 176430 AD; Colorectal cancer, somatic 114500; Mosaic variegated aneuploidy syndrome 1 257300 AR	yes, eye anomaly (257300)	1
SPOCD1	0.000264111	ACAT	619038	SPOC DOMAIN-CONTAINING PROTEIN 1; SPOCD1	1p35.2	1:31,790,421-31,816,050
TRIP12	0.000547731	ACAT	604506	THYROID HORMONE RECEPTOR INTERACTOR 12; TRIP12	2q36.3	2:229,763,836-229,923,233	Mental retardation, autosomal dominant 49 617752 AD	no
SCN5A	4.6e-05	ACAT	600163	SODIUM VOLTAGE-GATED CHANNEL, ALPHA SUBUNIT 5; SCN5A	3p22.2	3:38,548,060-38,649,686	{Sudden infant death syndrome, susceptibility to} 272120 AR; Atrial fibrillation, familial, 10 614022 AD; Brugada syndrome 1 601144 AD; Cardiomyopathy, dilated, 1E 601154 AD; Heart block, nonprogressive 113900 AD; Heart block, progressive, type IA 113900 AD; Long QT syndrome 3 603830 AD; Sick sinus syndrome 1 608567 AR; Ventricular fibrillation, familial, 1 603829	no
