# Supplementary material for: Rare variant analyses across multiethnic cohorts identify novel genes for refractive error
Source: Research Square preprint supplement (doi:10.21203/rs.3.rs-846265/v1), 2021-09-03
Supplement: Supplementary file 8 [file 960091fb4eb77f5acfb1b9a6.xlsx]

## Sheet: STable13
Supplementary Table 13: Indo-European meta-analysis genome-wide significant p-values for ACAT
Chr	Gene	Meta-pvalue	EPICNorfolk	BDES	IECC	REHS
19	GDF15	4.94e-10	0.9519	NA	1.32e-07	9.71e-06
1	ST6GALNAC5	9.03e-10	NA	NA	9.03e-10	NA
19	MUC16	9.13e-10	0.681784	0.112927	6.01e-12	0.426208
3	CCR5	2.96e-09	0.329338	0.0623793	0.537158	6.62e-11
2	PRLH	1.15e-08	NA	NA	1.15e-08	NA
11	MMP27	2.35e-08	9.76e-10	0.9155	0.218839	0.03806
16	CDYL2	1.19e-07	0.827781	0.761634	1.11e-10	0.667835
11	SLC43A3	5.46e-07	NA	NA	4.58e-08	0.6503
2	RRM2	8.73e-07	NA	0.2754	0.009549	1.61e-06
18	LOXHD1	1.02e-06	7.23e-06	0.188041	0.00046028	0.87003
1	PER3	1.15e-06	0.219013	0.480812	0.049848	1.2e-07
2	ATG16L1	1.82e-06	NA	0.2243	4.76e-07	NA
13	HSPH1	1.82e-06	0.57865	0.002358	0.245736	3.19e-06
5	C5orf42	1.88e-06	0.165404	0.507687	2.4e-08	0.551538
20	WISP2	1.94e-06	0.07106	NA	1.61e-06	NA
19	RFX2	2.7e-06	0.224501	0.157187	6.73e-08	0.709854
8	MROH1	2.94e-06	0.77079	0.364291	0.43737	1.52e-08
1	S100A16	3.11e-06	0.7049	0.4795	5.15e-08	NA
14	PELI2	3.38e-06	0.2149	0.84931	9.62e-08	0.124926
4	WDFY3	3.68e-06	0.768682	0.365591	1.09e-08	0.792105
12	CFAP73	3.79e-06	0.5647	0.7419	0.771695	7.76e-09
20	RTEL1	3.83e-06	0.00270162	0.216706	4.44e-06	0.976974
11	FERMT3	4.03e-06	0.2754	0.0546689	0.459895	3.89e-07
2	TMEM169	4.07e-06	NA	NA	4.07e-06	NA
7	PRKAR1B	4.18e-06	0.8244	0.4893	6.25e-08	0.1116
1	ATP8B2	5.19e-06	0.171089	0.474056	0.132148	3.38e-07
17	TOB1	6.82e-06	0.6513	NA	6.69e-07	NA
3	PIK3CA	7.15e-06	NA	NA	7.15e-06	NA
11	ALKBH3	8.88e-06	0.00142181	0.326618	0.13691	0.000106988

## Sheet: STable14
Supplementary Table 14: Indo-European meta-analysis genome-wide significant p-values for EMMAX-CMC
Chr	Gene	Meta-pvalue	EPICNorfolk	BDES	IECC	REHS
1	ST6GALNAC5	5.323e-11	NA	NA	5.323e-11	NA
19	GDF15	6.32491e-10	0.9879	NA	8.498e-08	1.897e-05
1	KIAA0040	4.553e-07	0.9802	NA	0.3403	6.176e-09
12	FOXM1	6.01382e-07	0.9551	0.5178	0.4109	1.463e-09
2	RRM2	8.7187e-07	NA	0.2754	0.00952	1.613e-06
19	KLF1	1.287e-06	1.287e-06	NA	NA	NA
19	PRKD2	1.86855e-06	0.9862	0.5503	0.8019	2.53e-09
1	S100A16	1.99083e-06	0.7055	0.2927	5.129e-08	NA
3	PDCD6IP	3.37e-06	NA	NA	3.37e-06	NA
7	SND1	6.28687e-06	0.03078	0.02204	0.09451	7.072e-05
3	PIK3CA	7.145e-06	NA	NA	7.145e-06	NA
2	STON1	7.62863e-06	0.05277	0.001386	0.003168	0.02456
16	VAT1L	9.77616e-06	0.6025	0.5276	1.984e-07	NA

## Sheet: STable15
Supplementary Table 15: All meta-analysis p-values using Indo-European cohorts for EMMAX-VT
Chr	Pos	Gene	Meta-pvalue	EACC	EPICNorfolk	BDES	IECC	REHS
19	18497024	GDF15	2.4073e-09	0.99	NA	2e-07	3.4e-05
5	71516795	MRPS27	1.8419e-08	7.6e-06	0.32	0.75	3.1e-06
18	2573067	NDC80	4.63406e-08	0.2	0.29	0.00046	6e-07
8	41504012	NKX6-3	1e-07	NA	NA	1e-07	NA
3	58413904	PDHB	1e-07	NA	NA	1e-07	NA
2	238475250	PRLH	1e-07	NA	NA	1e-07	NA
1	77510163	ST6GALNAC5	1e-07	NA	NA	1e-07	NA
11	70118489	PPFIA1	1.20771e-07	1e-07	0.14	0.0044	0.77
20	57875916	EDN3	2e-07	NA	NA	2e-07	NA
16	75512751	CHST6	2.42278e-07	0.092	0.0095	2e-07	0.6
22	36623628	APOL2	4.39252e-07	NA	0.11	1.2e-05	0.0015
12	86198594	RASSF9	5.02854e-07	0.61	0.31	0.0128	1e-07
1	162557419	UAP1	5.62303e-07	0.43	0.032	0.2	1e-07
17	44055786	MAPT	5.91557e-07	0.039	0.44	0.17	1e-07
2	120776742	EPB41L5	6.11296e-07	0.81	0.022	0.17	1e-07
7	127292442	SND1	6.90381e-07	0.076	0.0051	0.29	3.1e-06
2	10262920	RRM2	8.80754e-07	NA	0.27	0.0088	1.8e-06
9	125797493	GPR21	9.40908e-07	0.53	NA	1e-07	NA
11	57479507	MED19	1.12013e-06	0.015	0.41	0.99	1e-07
8	11565867	GATA4	1.33616e-06	0.063	0.15	1e-07	0.79
8	102555474	GRHL2	1.42444e-06	0.38	0.86	0.0082	3e-07
22	37420423	MPST	1.68102e-06	NA	0.86	2e-07	0.051
12	674486	NINJ2	1.73766e-06	0.63	0.017	0.045	2.1e-06
19	54818721	LILRA5	1.90453e-06	NA	NA	0.56	2e-07
2	234181677	ATG16L1	2.12776e-06	NA	0.18	7e-07	NA
2	217542888	IGFBP5	2.35927e-06	0.2	NA	0.64	1e-07
19	12995797	KLF1	2.4e-06	2.4e-06	NA	NA	NA
6	131206394	EPB41L2	2.43286e-06	0.068	0.22	1	1e-07
1	186303520	TPR	3.84947e-06	0.76	0.14	0.0016	1.5e-05
9	95608658	ZNF484	3.9453e-06	0.75	0.73	4e-07	0.012
18	11851686	CHMP1B	4.2e-06	NA	NA	4.2e-06	NA
12	2968078	FOXM1	5.06971e-06	0.87	0.27	0.15	1e-07
19	47768128	CCDC9	5.26014e-06	0.67	0.034	0.085	1.9e-06
6	116442897	AL121963.1	5.26725e-06	0.07	0.47	8e-07	0.14
18	12262897	CIDEA	5.50151e-06	0.75	0.022	0.47	5e-07
14	74401030	FAM161B	5.52148e-06	1e-07	0.59	0.44	0.15
19	5783515	PRR22	5.8199e-06	0.015	0.39	0.59	1.2e-06
7	99227172	ZNF498	5.86087e-06	0.96	0.75	0.058	1e-07
3	178922361	PIK3CA	6.1e-06	NA	NA	6.1e-06	NA
12	52681460	KRT81	6.16968e-06	0.32	0.77	0.18	1e-07
19	36271139	ARHGAP33	6.55908e-06	0.68	0.73	0.0096	1e-06
16	77850832	VAT1L	6.56249e-06	0.61	0.66	1e-07	NA
7	92158154	RBM48	7.0952e-06	0.67	0.15	0.52	1e-07
17	74381555	SPHK1	7.8426e-06	0.3	0.71	0.0092	3e-06
2	233986969	INPP5D	8.17733e-06	0.13	0.5	1e-07	0.95
1	155240602	CLK2	8.42877e-06	0.025	0.54	0.79	6e-07
1	175130119	KIAA0040	8.51863e-06	1	NA	0.54	1e-07
19	45810035	CKM	8.59971e-06	0.48	0.35	0.39	1e-07
16	30774829	RNF40	9.42218e-06	1.2e-06	0.76	0.016	0.5
1	153580155	S100A16	1.02601e-05	0.74	0.45	2e-07	NA
5	66478729	CD180	1.05381e-05	NA	0.24	0.26	1.1e-06
12	21602576	PYROXD1	1.08557e-05	NA	0.13	0.42	1.3e-06
15	43482543	CCNDBP1	1.10876e-05	0.22	0.082	7e-07	0.7
1	248844830	OR14I1	1.11422e-05	0.069	0.42	0.059	5.2e-06
1	204507383	MDM4	1.13417e-05	0.36	0.97	0.26	1e-07
2	234967597	SPP2	1.2e-05	NA	NA	1.2e-05	NA
7	99627504	ZKSCAN1	1.22592e-05	0.29	0.52	0.66	1e-07
16	3117564	IL32	1.25537e-05	0.064	0.28	0.084	6.8e-06
3	33840234	PDCD6IP	1.3e-05	NA	NA	1.3e-05	NA
2	170441001	PPIG	1.45652e-05	NA	0.38	4.2e-06	0.062
9	131085373	COQ4	1.54851e-05	0.77	0.24	0.71	1e-07
16	80641994	CDYL2	1.56439e-05	0.93	0.17	1e-07	0.84
9	125622259	RC3H2	1.72351e-05	0.37	0.66	1e-07	0.61
1	113252841	PPM1J	1.85137e-05	0.21	0.22	0.13	2.7e-06
20	42196550	SGK2	1.88975e-05	1e-07	0.67	0.31	0.8
16	50112794	HEATR3	1.98251e-05	0.55	0.39	0.02	4.1e-06
7	24742437	DFNA5	1.98454e-05	0.52	0.37	0.0113	8.1e-06
2	131519731	FAM123C	2.03925e-05	NA	0.23	0.9	7e-07
1	113098534	ST7L	2.08657e-05	0.026	0.79	0.13	7e-06
10	45430394	TMEM72	2.24093e-05	NA	0.32	0.72	7e-07
20	3804572	AP5S1	2.31755e-05	0.71	NA	0.59	4e-07
2	210517915	MAP2	2.37024e-05	0.71	0.036	0.37	2.3e-06
12	113587667	CCDC42B	2.46081e-05	0.54	0.52	0.81	1e-07
1	32829448	TSSK3	2.71143e-05	0.66	NA	2.9e-06	NA
3	196098796	UBXN7	2.74323e-05	0.24	0.046	3.5e-06	0.67
5	79950781	MSH3	2.76518e-05	0.66	0.88	0.45	1e-07
8	124195359	FAM83A	2.78348e-05	0.21	0.16	8e-07	0.98
11	132306610	OPCML	3.04427e-05	0.99	0.21	3e-07	0.47
2	175962173	ATF2	3.42955e-05	0.25	0.13	0.2	5.2e-06
14	93652787	RP11-371E8.4	3.47053e-05	0.0093	0.96	0.016	0.00024
15	74174064	TBC1D21	3.49391e-05	0.64	0.36	0.75	2e-07
19	10742170	SLC44A2	3.58911e-05	0.35	0.103	4.5e-06	0.22
5	143586755	KCTD16	3.86225e-05	0.14	0.071	1.4e-05	0.28
14	23844979	IL25	4.5019e-05	0.87	0.02	0.69	3.9e-06
4	128608927	INTU	4.68669e-05	1.4e-06	0.5	0.27	0.26
5	140558064	PCDHB8	4.82841e-05	NA	0.43	0.9	1e-06
5	139930460	SRA1	4.86479e-05	0.056	0.19	0.046	0.000105
1	45224990	KIF2C	5.12891e-05	NA	0.55	0.0029	0.00026
19	47177800	PRKD2	5.13964e-05	1	0.61	0.9	1e-07
11	35456061	PAMR1	5.20906e-05	0.0054	0.2	0.063	0.00082
2	201253956	SPATS2L	5.29556e-05	0.76	0.26	3e-07	0.96
11	67163251	RAD9A	5.57899e-05	NA	0.59	0.86	9e-07
5	78985833	CMYA5	5.79351e-05	0.052	0.052	0.067	0.00035
3	46414557	CCR5	6.81088e-05	0.52	0.38	0.78	5e-07
8	82606322	SLC10A5	6.84549e-05	0.11	0.24	0.33	8.9e-06
3	32398997	CMTM8	7.03307e-05	0.43	0.69	0.15	1.8e-06
10	125771945	CHST15	7.25311e-05	0.62	0.00014	0.93	0.00103
16	89952262	TCF25	7.7092e-05	0.45	7.8e-05	0.003	0.85
8	94746049	RBM12B	8.21946e-05	0.79	0.55	0.106	2.1e-06
2	48807796	STON1	8.55836e-05	0.16	0.00023	0.023	0.12
9	21141080	IFNW1	8.85595e-05	0.71	0.071	0.6	3.5e-06
16	23360165	SCNN1B	9.31176e-05	1	0.5	0.00015	0.0015
19	45206676	CEACAM16	9.54595e-05	0.11	0.085	3.1e-05	0.4
1	44877962	RNF220	9.80087e-05	NA	NA	0.59	1.3e-05
1	183849869	RGL1	9.98896e-05	5e-06	0.35	0.2	0.35
19	8961981	AC008734.2	0.000101902	0.58	0.0092	0.0056	0.0042
22	35777185	HMOX1	0.000103039	0.0014	0.59	0.11	0.0014
5	140166348	PCDHA1	0.000105724	6e-07	0.56	0.42	0.93
19	14023191	CC2D1A	0.000106008	0.35	0.022	5.7e-05	0.3
1	210856825	KCNH1	0.000115886	NA	4.6e-05	0.2	NA
16	3273905	ZNF200	0.00011773	0.29	0.34	3.7e-05	0.041
1	120293430	HMGCS2	0.000118877	0.21	0.21	0.0026	0.00132
5	77311229	AP3B1	0.000124528	0.46	0.32	0.64	1.7e-06
5	140262595	PCDHA13	0.000136822	0.27	0.56	0.54	2.2e-06
11	43905557	ALKBH3	0.000137894	2.6e-05	0.47	0.28	0.053
11	124440362	OR8A1	0.000144302	0.029	0.17	5.4e-05	0.72
10	70940052	SUPV3L1	0.000147944	NA	0.61	0.96	2.4e-06
18	59854886	KIAA1468	0.000149443	0.13	0.62	0.73	3.4e-06
7	30915263	AQP1	0.000152381	0.12	0.32	5.5e-06	0.97
1	32842319	BSDC1	0.000156487	0.0042	0.00013	0.76	0.51
13	20207923	MPHOSPH8	0.000157431	0.81	0.56	0.94	5e-07
1	2441358	PANK4	0.00016218	NA	NA	0.051	0.00026
3	52570892	C3orf78	0.000166126	0.84	NA	2.9e-06	0.66
20	43629135	STK4	0.000167747	0.8	0.72	5e-07	0.8
5	157098756	C5orf52	0.000169132	0.0012	0.0072	0.19	NA
6	149826740	PPIL4	0.000170917	0.0054	NA	0.0026	NA
19	58639296	ZNF329	0.000174682	0.082	0.021	0.074	0.0019
12	55820277	OR6C76	0.000175816	0.6	NA	0.54	5.3e-06
3	133877002	RYK	0.00018	NA	NA	0.00018	NA
19	51503966	KLK8	0.000186936	0.18	8.6e-05	NA	NA
8	98289238	TSPYL5	0.000192801	0.2	0.55	0.69	3.6e-06
13	31712572	HSPH1	0.000196347	0.77	0.014	0.54	4.8e-05
11	102562700	MMP27	0.000201978	6.5e-06	0.69	0.43	0.15
15	74703102	SEMA7A	0.000204129	0.54	0.16	0.00106	0.0032
16	58537777	NDRG4	0.000206864	0.00026	0.062	0.42	0.044
19	41284295	RAB4B	0.000207868	NA	0.22	7.9e-05	NA
2	120658328	PTPN4	0.000209761	0.74	0.35	0.65	1.8e-06
21	34640788	IL10RB	0.00021158	NA	0.3	1	7.1e-06
10	97772358	CC2D2B	0.00022	NA	NA	0.00022	NA
16	57147265	CPNE2	0.00022555	NA	NA	2e-05	0.95
17	8397065	MYH10	0.00022786	0.044	0.17	0.69	6.5e-05
3	128780823	GP9	0.00023	NA	NA	0.00023	NA
8	145223240	HEATR7A	0.00023166	0.55	0.83	0.75	1e-06
19	42792080	CIC	0.000245059	0.42	0.2	4.8e-06	0.91
3	52448051	PHF7	0.000247536	0.00018	0.049	0.29	NA
12	6981526	SPSB2	0.00025222	0.16	NA	1.9e-05	0.86
5	135186141	SLC25A48	0.000278185	0.8	0.55	0.39	2.5e-06
9	132501906	PTGES	0.00028	NA	NA	0.00028	NA
4	165961915	TRIM60	0.000282411	0.00041	0.41	0.013	0.2
1	172501617	SUCO	0.000283818	0.61	0.3	0.89	2.7e-06
12	106704974	TCP11L2	0.000291034	0.84	0.2	0.15	1.8e-05
19	51981946	CEACAM18	0.000303185	0.0028	0.71	0.0012	0.2
12	4830000	GALNT8	0.000304419	0.14	0.73	0.68	6.9e-06
11	59856240	MS4A2	0.000306574	0.26	0.38	0.72	6.8e-06
10	43659382	CSGALNACT2	0.000308927	NA	6.7e-05	0.4	NA
2	27665973	KRTCAP3	0.00031	NA	NA	0.00031	NA
4	48894868	OCIAD2	0.000317336	NA	0.23	0.00012	NA
9	80851369	CEP78	0.000348292	0.99	0.17	0.99	3.4e-06
11	67203389	PTPRCAP	0.000356556	NA	0.47	9.7e-06	0.86
17	7760158	LSMD1	0.000360783	0.48	0.82	1.01e-05	NA
19	47646779	SAE1	0.000365159	0.029	NA	0.00111	NA
12	71519116	TSPAN8	0.000365749	0.76	0.75	0.44	2.4e-06
16	2286876	DNASE1L2	0.000369033	0.51	0.27	0.34	1.3e-05
5	1254510	TERT	0.000374831	0.54	0.76	0.0028	0.00054
15	85326955	ZNF592	0.000378504	0.85	0.13	0.00098	0.0058
16	23536641	EARS2	0.000390257	0.39	0.85	0.48	4.1e-06
15	42120342	JMJD7-PLA2G4B	0.00040492	5.1e-05	0.096	0.31	0.45
2	48807796	STON1-GTF2A1L	0.000415664	0.2	0.00035	0.048	0.21
1	154302929	ATP8B2	0.000417754	0.086	0.86	0.3	3.2e-05
4	20482339	SLIT2	0.000418275	0.86	0.68	0.16	7.6e-06
10	70190248	DNA2	0.00042498	0.24	0.046	0.9	7.3e-05
10	73199595	CDH23	0.000443731	0.28	0.71	0.35	1.1e-05
12	101573812	SLC5A8	0.000446002	0.62	0.0087	0.00042	0.34
11	63974995	FERMT3	0.000452643	0.32	0.26	0.41	2.3e-05
14	93652787	TMEM251	0.000475927	0.018	1	0.16	0.00029
2	127956952	CYP27C1	0.000476932	5.3e-05	1	0.02	0.79
8	32453358	NRG1	0.000488931	0.35	0.29	0.23	3.7e-05
5	140864784	PCDHGC4	0.000490844	0.00026	0.6	0.107	0.052
12	101133748	ANO4	0.000495257	0.00022	0.13	0.033	0.93
13	31195297	USPL1	0.000511091	0.38	0.84	0.013	0.00022
15	50757285	USP8	0.000511276	1	0.56	1.07e-05	NA
18	44260159	ST8SIA5	0.000513371	0.0075	0.6	0.12	0.0017
19	3728600	TJP3	0.00051598	0.6	0.26	0.94	6.3e-06
5	140235875	PCDHA10	0.000518995	0.85	0.85	0.56	2.3e-06
11	73141742	FAM168A	0.00053	NA	NA	0.00053	NA
14	105404944	AHNAK2	0.000534444	0.51	0.14	0.52	2.6e-05
19	8651082	ADAMTS10	0.000535733	0.91	0.2	0.14	3.8e-05
19	282181	PPAP2C	0.000546658	0.000124	0.52	0.14	0.11
18	61377472	SERPINB11	0.000553319	0.47	0.0075	0.11	0.0026
6	11185533	NEDD9	0.000565012	0.22	0.7	1.4e-05	0.48
8	101717149	PABPC1	0.000573812	0.23	NA	0.00023	NA
17	16347205	FAM211A	0.000579246	0.56	NA	0.31	4e-05
16	77759403	NUDT7	0.000609081	0.136	0.11	0.38	0.0002
16	86544651	FOXF1	0.00061	NA	NA	0.00061	NA
3	15717421	ANKRD28	0.000623287	0.32	0.101	0.051	0.00071
9	5231539	INSL4	0.000625589	0.56	0.0096	0.27	0.00081
2	242255830	2020-09-02	0.000625805	0.26	0.2	0.78	2.9e-05
13	52603194	UTP14C	0.000627417	0.84	0.33	0.99	4.3e-06
12	55846125	OR6C2	0.000652837	0.23	0.56	0.9	1.07e-05
3	121575986	EAF2	0.000653471	0.77	0.0014	0.0018	0.64
5	37303392	NUP155	0.000657234	NA	0.28	3.6e-05	0.8
12	54893194	NCKAP1L	0.000665612	0.088	0.83	2e-05	0.87
8	145729682	GPT	0.000694523	0.72	0.14	0.00035	0.038
3	168806803	MECOM	0.000699705	5.2e-05	0.043	0.68	0.89
3	58486772	KCTD6	0.0007	NA	NA	0.0007	NA
6	3456430	SLC22A23	0.000700359	0.97	0.79	0.00104	0.0017
9	91616573	S1PR3	0.000711187	2.7e-06	0.7	0.84	0.87
15	65295441	MTFMT	0.000715306	0.33	0.34	0.0031	0.004
19	16764936	C19orf42	0.000719902	0.69	0.93	1.4e-05	NA
18	25532304	CDH2	0.00073425	0.8	9.1e-06	0.25	0.79
12	53491511	IGFBP6	0.00076	NA	NA	0.00076	NA
21	36042189	CLIC6	0.000768681	0.028	0.063	0.00157	0.55
5	167993100	PANK3	0.000777847	NA	0.02	0.0037	NA
1	103379918	COL11A1	0.000781463	0.018	0.024	0.12	0.03
7	150932631	CHPF2	0.000785848	0.19	0.92	0.00016	0.056
14	73961982	HEATR4	0.000816662	0.71	0.73	0.61	5.2e-06
16	85834818	COX4I1	0.000819569	NA	NA	0.00014	0.56
16	56508775	OGFOD1	0.000826753	0.52	0.26	0.95	1.3e-05
1	231829752	DISC1	0.000847931	0.43	0.0151	0.45	0.00059
3	49004687	ARIH2	0.00085	NA	NA	0.00085	NA
5	140187322	PCDHA4	0.000852371	0.0037	0.67	0.5	0.0014
12	8800767	MFAP5	0.00085512	NA	NA	0.83	9.9e-05
5	137688497	KDM3B	0.000892356	0.11	0.53	0.083	0.00038
19	58867567	ZNF497	0.000904478	NA	0.16	0.0127	0.0058
13	26043182	ATP8A2	0.00092046	0.083	0.002	0.016	0.72
14	30046460	PRKD1	0.000933642	NA	0.75	0.068	0.00024
3	101044840	SENP7	0.000943611	4.9e-05	0.81	0.113	0.44
7	141629932	CLEC5A	0.00095	NA	NA	0.00095	NA
3	9862274	TTLL3	0.000969579	0.037	0.24	0.00025	0.92
9	139656670	LCN15	0.000969727	0.87	0.92	1.6e-05	NA
15	42134097	PLA2G4B	0.000975308	3.8e-05	0.19	0.3	0.95
16	74657852	RFWD3	0.000979334	0.91	0.0084	0.00033	0.82
19	18273910	PIK3R2	0.00100047	0.88	0.5	7e-06	0.69
7	95775966	SLC25A13	0.00100717	0.82	NA	3.8e-05	0.43
1	158368356	OR10T2	0.00102165	0.64	0.22	0.5	3.1e-05
12	49298799	CCDC65	0.0010493	0.73	0.94	0.94	3.5e-06
4	110581363	CCDC109B	0.00105785	0.55	0.064	0.8	8.1e-05
12	83251304	TMTC2	0.00108893	0.058	0.00025	0.96	0.17
17	76115441	TMC6	0.00112395	0.079	0.86	0.98	3.7e-05
8	6783479	DEFA6	0.00115023	0.29	0.017	0.00083	0.62
14	94503780	OTUB2	0.00116454	0.00023	NA	0.33	0.21
19	863220	CFD	0.00116865	NA	0.41	0.64	6.1e-05
10	75005894	DNAJC9	0.0012	NA	NA	0.0012	NA
12	96260923	CCDC38	0.0012178	NA	NA	0.38	0.00032
5	149677352	ARSI	0.00121845	0.52	0.3	2.5e-05	0.7
19	18234789	MAST3	0.00122151	0.52	0.99	0.7	7.6e-06
16	2263822	PGP	0.00122253	0.62	0.067	0.033	0.002
12	93196332	EEA1	0.0012374	0.59	0.121	0.0001	0.39
16	57596371	GPR114	0.00125676	0.41	0.00078	0.012	0.74
19	50938483	MYBPC2	0.00126488	0.023	0.91	0.19	0.00072
17	38925270	KRT26	0.00127062	0.014	0.11	0.055	0.034
10	87362238	GRID1	0.0012816	NA	NA	0.013	0.0099
9	32974493	APTX	0.00128263	0.72	0.46	0.00055	0.016
19	8576629	ZNF414	0.00128876	0.0037	NA	0.035	NA
6	31583312	AIF1	0.0013	NA	NA	0.0013	NA
2	208993135	CRYGC	0.00131959	0.21	0.45	0.041	0.00078
9	123667304	TRAF1	0.00132161	0.25	0.00014	0.53	NA
2	68873071	PROKR1	0.00132316	NA	0.18	0.043	0.0024
12	18435151	PIK3C2G	0.00132975	0.55	1.7e-05	0.96	0.34
6	42176643	MRPS10	0.0013396	0.0085	0.82	0.0017	0.26
11	63713377	NAA40	0.00136273	0.6	0.064	0.41	0.0002
17	48940422	TOB1	0.00136991	0.66	NA	0.00021	NA
1	11561593	PTCHD2	0.00138334	0.00033	0.078	0.29	0.43
17	79632308	OXLD1	0.0014	NA	NA	0.0014	NA
5	42695025	GHR	0.0014455	0.0043	0.94	0.0035	0.24
10	112837873	ADRA2A	0.00144675	0.88	0.47	5e-05	NA
1	36932047	CSF3R	0.00144773	0.00025	0.54	0.12	0.21
7	5254173	WIPI2	0.00145775	0.34	NA	6.2e-05	0.99
17	65733661	NOL11	0.00146119	0.017	0.25	0.54	0.0015
11	46701791	ARHGAP1	0.00149712	NA	0.00018	0.85	NA
10	102566298	PAX2	0.0015	NA	NA	0.0015	NA
5	139947520	SLC35A4	0.00153909	0.14	0.24	0.00015	0.73
2	237997288	COPS8	0.00157	NA	NA	0.00157	NA
11	57175299	SLC43A3	0.00158029	NA	NA	0.00025	0.65
1	158045965	KIRREL	0.00159057	1	0.89	0.77	5.6e-06
10	4872930	AKR1E2	0.0016	NA	NA	0.0016	NA
9	79634693	FOXB2	0.0016	NA	NA	0.0016	NA
1	8073700	ERRFI1	0.0016011	0.005	0.97	0.42	0.0019
5	79616059	SPZ1	0.00162349	0.72	0.38	0.012	0.0012
2	11919747	LPIN1	0.0016514	0.035	0.036	0.068	0.047
12	50571079	LIMA1	0.00166475	0.39	0.92	1.8e-05	0.63
19	58517342	CTD-2368P22.1	0.0017	0.0017	NA	NA	NA
9	116854714	KIF12	0.0017167	0.51	0.104	0.38	0.00021
10	72192832	NODAL	0.00171912	0.85	NA	0.00021	NA
3	49215404	RP11-694I15.6	0.00173982	NA	0.0067	0.027	NA
3	111812214	C3orf52	0.00174558	0.13	0.66	0.084	0.0006
12	108086847	PWP1	0.00174558	0.4	0.11	0.00108	0.091
11	46801859	CKAP5	0.00174787	0.85	0.28	0.13	0.00014
3	50337932	HYAL1	0.0017581	0.76	0.097	0.00016	0.37
20	44330799	WFDC13	0.00176104	NA	0.56	0.36	0.00013
6	135290443	HBS1L	0.00177022	0.56	0.00063	0.026	0.48
17	64208285	APOH	0.0018	NA	NA	0.0018	NA
6	46623698	SLC25A27	0.00180944	0.18	NA	0.00105	NA
12	104187732	NT5DC3	0.00182548	0.3	0.87	0.65	2.7e-05
15	71952899	THSD4	0.00188234	2.3e-05	0.76	0.29	0.94
1	11073982	TARDBP	0.00188639	0.44	NA	0.00045	NA
22	39440149	APOBEC3F	0.00188937	0.02	0.95	0.012	0.021
14	102814997	CINP	0.0019	NA	NA	0.0019	NA
11	17323361	NUCB2	0.0019	NA	NA	0.0019	NA
9	132481557	PRRX2	0.0019	NA	NA	0.0019	NA
1	234367309	SLC35F3	0.0019	NA	NA	0.0019	NA
17	74075359	ZACN	0.00191168	0.078	0.38	0.0004	0.41
12	122657198	IL31	0.0019178	0.0033	0.124	0.071	NA
9	95993170	WNK2	0.00194681	0.022	0.65	0.0012	0.29
21	19165833	C21orf91	0.00194766	NA	0.57	0.00036	NA
4	155530877	FGG	0.00198435	0.069	0.11	0.021	0.032
17	39880966	HAP1	0.00198682	0.17	0.9	0.00053	0.063
20	29992741	DEFB121	0.002	NA	NA	0.002	NA
10	124672351	FAM24A	0.002	NA	NA	0.002	NA
16	67697180	C16orf48	0.00201039	7.5e-05	0.76	0.26	0.35
9	116152053	ALAD	0.00201149	0.9	NA	0.19	0.00018
17	4684084	TM4SF5	0.00201882	0.89	NA	0.00024	NA
5	55237014	IL6ST	0.00203079	0.023	0.12	0.0068	0.28
5	80736449	SSBP2	0.00203671	NA	0.31	0.084	0.0012
1	57397497	C8B	0.00207003	0.0045	0.15	0.042	0.19
14	94931042	SERPINA9	0.00208695	0.00027	0.58	0.079	0.44
1	150482145	ECM1	0.00209809	0.12	0.029	0.0021	0.75
1	145293490	NBPF10	0.0021	0.0021	NA	NA	NA
7	142417019	U66061.31	0.0021	0.0021	NA	NA	NA
6	17764395	KIF13A	0.00211083	0.61	0.13	0.081	0.00086
1	152006266	S100A11	0.00211582	0.035	0.11	0.0085	NA
10	121086097	GRK5	0.00212153	0.00019	0.18	0.96	NA
14	100803422	WARS	0.0021253	0.093	0.47	0.00015	0.85
5	140011867	CD14	0.00213303	NA	0.85	0.36	0.000108
14	76620980	C14orf118	0.00214424	3.8e-05	0.86	0.23	0.75
15	78917316	CHRNB4	0.00215304	0.0035	0.023	0.64	0.11
2	37319156	CCDC75	0.00219028	NA	0.13	0.0018	NA
14	58038735	SLC35F4	0.0022	NA	NA	0.0022	NA
20	43113099	TTPAL	0.0022	NA	NA	0.0022	NA
8	107773675	ABRA	0.00220031	NA	0.00028	0.84	NA
17	46239844	SKAP1	0.00229861	NA	NA	0.13	0.0019
22	32330282	C22orf24	0.0023	NA	NA	0.0023	NA
2	113479614	NT5DC4	0.0023	0.0023	NA	NA	NA
11	57480270	TMX2-CTNND1	0.00231854	0.043	NA	0.0058	NA
7	44663949	OGDH	0.00232208	0.014	0.04	0.62	0.018
3	130095179	COL6A5	0.00235401	0.15	0.62	7.2e-05	0.95
19	2233855	PLEKHJ1	0.00236907	NA	0.73	0.00035	NA
15	65851028	PTPLAD1	0.00237919	1	0.95	7.3e-06	0.93
11	71906438	FOLR1	0.00241435	1.5e-05	0.63	0.94	0.74
1	43804305	MPL	0.0024206	0.77	0.86	1.2e-05	0.83
8	6371240	ANGPT2	0.00246844	0.012	0.087	0.009	0.72
17	72915673	USH1G	0.00248481	0.58	0.69	0.55	3.1e-05
9	108424845	TAL2	0.0025	NA	NA	0.0025	NA
10	114724358	TCF7L2	0.0025	NA	NA	0.0025	NA
17	56348106	MPO	0.00253012	0.49	0.11	0.00016	0.81
9	36583642	MELK	0.00253909	0.043	0.15	0.068	0.016
3	184542480	VPS8	0.00255695	0.3	0.11	0.58	0.00037
12	95478283	FGD6	0.00256578	0.15	0.48	0.00019	0.52
18	44057151	LOXHD1	0.00258557	0.27	0.065	0.00046	0.89
19	6007016	RFX2	0.00259316	0.73	0.13	0.0002	0.38
19	9490760	ZNF177	0.00260621	0.62	0.17	0.0004	NA
19	14521875	DDX39A	0.00270917	NA	0.11	0.0027	NA
4	55127448	PDGFRA	0.00272966	0.66	0.11	0.00018	0.59
5	76729018	WDR41	0.00276298	0.0066	0.3	0.46	0.0086
15	76191802	UBE2Q2	0.00277438	0.25	0.15	0.0005	0.42
7	102716226	ARMC10	0.00279626	0.5	0.0048	0.0085	0.39
12	80014927	PAWR	0.00285657	NA	0.25	0.00023	0.82
18	22020467	IMPACT	0.00287491	0.72	0.0044	0.015	NA
7	72717986	NSUN5	0.00288044	0.18	0.31	0.039	0.0038
8	139164192	FAM135B	0.00288536	0.4	0.4	0.14	0.00037
1	155734742	GON4L	0.00288814	0.0092	0.041	0.2	0.11
13	113030756	SPACA7	0.00291119	0.23	NA	0.0014	NA
7	99817878	PVRIG	0.00292726	0.18	NA	0.0018	NA
17	45360730	RP11-290H9.2	0.00294722	0.56	1.9e-05	0.91	0.88
10	67680203	CTNNA3	0.00298977	0.53	0.52	0.75	4.2e-05
19	41235134	ITPKC	0.00303085	0.25	0.0014	0.101	0.25
7	140037084	SLC37A3	0.003066	0.34	0.00084	0.18	NA
17	7534678	SHBG	0.00309873	NA	0.0002	0.28	0.93
1	153984776	NUP210L	0.00313439	0.27	0.15	0.0095	0.024
11	55904382	OR8J3	0.00315309	NA	0.4	0.00014	0.95
1	43212869	LEPRE1	0.00321675	0.61	0.58	0.0018	0.015
17	68128259	KCNJ16	0.00322115	0.62	0.21	0.98	7.5e-05
15	75931966	IMP3	0.00324601	0.19	0.0023	0.158	0.14
9	37486603	POLR1E	0.00324903	0.0015	0.0078	0.88	0.94
21	45217539	RRP1	0.0032845	0.069	0.96	0.00038	0.39
9	127215778	GPR144	0.0033114	0.054	0.029	0.0072	0.88
2	160585617	2020-03-07	0.00336213	0.66	0.45	0.048	0.00071
10	21074832	NEBL	0.00336615	0.8	0.9	2.2e-05	0.64
7	157208773	DNAJB6	0.00338286	NA	0.41	0.00093	NA
15	62995056	TLN2	0.00340803	0.18	0.015	0.053	0.072
3	73433369	PDZRN3	0.00342932	0.24	0.67	0.00017	0.38
10	50944160	OGDHL	0.00347948	0.12	0.92	0.000137	0.7
9	33255252	BAG1	0.0035	NA	NA	0.0035	NA
1	27648785	TMEM222	0.0035398	0.96	0.2	0.047	0.0012
6	50811026	TFAP2B	0.00358157	0.32	0.15	0.029	0.0079
6	27860534	HIST1H3J	0.0036	0.0036	NA	NA	NA
11	57480270	TMX2	0.00360383	0.039	NA	0.0105	NA
19	855753	ELANE	0.00362776	0.54	0.0003	NA	0.39
8	124094998	WDR67	0.00363786	0.24	0.79	0.00037	0.16
17	57232365	SKA2	0.0036407	0.16	0.22	0.00038	0.84
6	32010272	TNXB	0.00364126	0.38	0.62	0.00045	0.106
19	8555886	PRAM1	0.00366915	0.13	0.77	0.42	0.00027
12	15130981	PDE6H	0.00368561	0.015	0.028	NA	NA
9	5534924	PDCD1LG2	0.00368867	0.012	0.084	0.42	0.027
6	90605664	GJA10	0.00369821	0.059	0.024	0.15	0.054
4	84015850	PLAC8	0.0037	NA	NA	0.0037	NA
2	128016978	ERCC3	0.00371727	0.00033	0.81	0.36	0.12
13	50235186	EBPL	0.00373929	0.25	0.00043	0.61	NA
1	113638551	LRIG2	0.0037458	0.012	0.27	0.3	0.012
20	43353380	WISP2	0.00375549	0.066	NA	0.0065	NA
17	27896342	TP53I13	0.0037845	0.26	0.056	0.28	0.0029
6	33247085	WDR46	0.00381448	NA	0.8	0.006	0.014
5	14601182	FAM105A	0.00384101	0.0027	0.19	0.047	0.5
1	90179041	LRRC8C	0.0038454	0.008	0.56	0.35	0.0077
16	5097947	C16orf89	0.00384716	0.14	0.017	0.0054	0.94
9	117792583	TNC	0.00386327	0.44	0.28	0.00017	0.58
17	45360730	ITGB3	0.00386536	0.66	2.3e-05	0.91	0.88
11	68478462	MTL5	0.00388234	0.57	0.65	0.0003	0.11
6	49701439	CRISP3	0.00388796	0.63	0.00012	0.91	NA
2	240981262	PRR21	0.0039	0.0039	NA	NA	NA
3	49149020	USP19	0.00392051	0.00032	0.057	0.97	0.7
6	132636774	MOXD1	0.00392604	0.96	0.11	0.025	0.0047
12	121647974	P2RX4	0.00392975	0.47	0.037	0.0038	0.188
20	42965863	R3HDML	0.00395772	0.8	0.25	0.00033	0.19
11	62763248	SLC22A8	0.00396003	0.99	0.86	0.67	2.2e-05
1	168066163	GPR161	0.00396877	0.8	0.63	0.00014	NA
3	42734587	HHATL	0.00398318	0.34	0.123	0.54	0.00056
1	92495782	EPHX4	0.004	NA	NA	0.004	NA
3	10219567	IRAK2	0.00401358	0.95	0.83	0.9	1.8e-05
10	71874048	AIFM2	0.00401783	0.94	0.14	0.0012	0.081
14	69341650	ACTN1	0.00403317	NA	0.0005	0.93	NA
19	16611613	C19orf44	0.00406248	0.12	0.13	0.32	0.0026
13	101742315	NALCN	0.00407369	0.11	0.86	0.27	0.00051
12	7894056	CLEC4C	0.00409448	0.0086	NA	0.055	NA
11	73712513	UCP3	0.00411354	3.6e-05	0.49	0.88	0.85
12	81112786	MYF5	0.00415567	0.37	NA	0.0013	NA
12	7280924	RBP5	0.0042	NA	0.0042	NA	NA
3	128181491	DNAJB8	0.00422129	NA	NA	0.0072	0.068
8	144808572	FAM83H	0.00424624	0.014	0.024	0.045	0.91
19	54801978	LILRA3	0.00426242	0.33	NA	0.0015	NA
9	135285802	C9orf171	0.00427448	0.18	0.42	0.0108	0.017
12	108140094	PRDM4	0.00436459	0.00058	0.82	0.12	0.25
2	120194499	TMEM37	0.00439288	NA	0.068	0.0012	0.98
11	113650902	CLDN25	0.0044	NA	NA	0.0044	NA
15	67528353	AAGAB	0.00446856	0.047	0.55	0.0078	0.073
17	60501370	METTL2A	0.00451251	NA	0.012	0.044	NA
12	47471393	AMIGO2	0.00451623	0.24	0.012	0.071	0.073
5	1318491	CLPTM1L	0.00458244	0.00032	0.62	0.13	0.59
1	209964080	IRF6	0.0046	NA	NA	0.0046	NA
16	28986603	SPNS1	0.00461163	0.79	0.74	3.5e-05	0.75
2	113404460	SLC20A1	0.00466404	0.17	0.77	0.34	0.00035
5	179264450	C5orf45	0.00468764	0.18	0.12	0.0022	0.33
19	7735140	RETN	0.00468985	NA	0.3	0.00034	0.85
3	10089689	FANCD2	0.00477251	0.016	0.34	0.036	0.082
8	73849653	KCNB2	0.00478155	0.26	0.004	0.043	0.36
12	1702470	FBXL14	0.00479212	0.073	0.00032	0.96	0.72
17	73106604	ARMC7	0.0048	NA	NA	0.0048	NA
5	50685756	ISL1	0.0048	NA	NA	0.0048	NA
11	130750592	SNX19	0.00480366	0.1	0.14	0.0013	0.89
5	143539969	YIPF5	0.0048146	0.59	0.46	0.00033	NA
1	203740024	LAX1	0.00482691	0.22	0.75	0.52	0.00019
1	85405253	MCOLN2	0.00487639	0.00034	0.3	0.18	0.9
11	102201848	BIRC3	0.00488821	0.78	NA	0.00065	0.18
17	41365196	TMEM106A	0.00489945	0.000104	NA	0.88	1
2	242029426	MTERFD2	0.00490244	0.2	NA	0.0029	NA
13	48881492	RB1	0.00491056	0.46	0.16	0.0103	0.022
5	140794346	PCDHGA10	0.00493206	0.62	0.16	0.089	0.0019
2	20455925	PUM2	0.00494138	0.11	0.0002	0.91	0.84
7	108212174	DNAJB9	0.00504011	NA	0.093	0.00104	0.98
8	37707199	BRF2	0.00504735	0.99	0.24	0.0056	0.013
12	121000846	RNF10	0.00505779	0.073	0.18	0.8	0.00165
21	33296950	HUNK	0.00508832	0.00012	0.5	0.47	0.62
20	44166646	WFDC6	0.0051	NA	NA	0.0051	NA
17	7761512	CYB5D1	0.00510041	0.84	0.00012	0.29	0.6
9	136337168	SLC2A6	0.00510868	0.00031	0.9	1	0.063
5	176759170	LMAN2	0.00511328	0.017	0.27	0.71	0.0054
1	32193185	BAI2	0.00511429	0.0059	0.45	0.13	0.051
15	78873272	CHRNA5	0.00515529	NA	0.47	0.122	0.0017
10	118427779	C10orf82	0.00516963	0.28	NA	0.0022	NA
1	27432204	SLC9A1	0.00518219	0.89	0.74	0.16	0.00017
19	11546269	PRKCSH	0.00520387	0.0002	0.92	0.11	0.89
17	4337412	SPNS3	0.00520482	0.018	0.55	0.91	0.002
3	186915414	RTP1	0.0052657	0.017	0.13	0.23	0.036
12	31446744	FAM60A	0.0053	NA	NA	0.0053	NA
19	21990464	ZNF43	0.0053	NA	NA	0.0053	NA
9	15422960	SNAPC3	0.00534822	0.0045	0.66	0.074	0.085
5	61747557	IPO11	0.00539434	0.17	0.00067	0.79	0.21
5	172518171	CREBRF	0.0054	NA	NA	0.0054	NA
21	35742799	KCNE2	0.00540537	0.0009	NA	0.72	NA
7	151791365	GALNT11	0.00552075	0.004	0.15	0.056	0.58
14	51712054	TMX1	0.0056	NA	NA	0.0056	NA
12	95656704	VEZT	0.00565699	0.083	0.99	0.35	0.0007
7	156468427	RNF32	0.0057449	NA	0.00027	0.59	0.7
19	37917195	ZNF569	0.00576476	0.84	NA	0.00083	NA
11	24759780	LUZP2	0.0057851	NA	NA	0.5	0.0014
11	114393652	NXPE1	0.0058379	0.3	0.32	0.27	0.00081
5	149495360	PDGFRB	0.00589198	0.22	0.95	0.000113	0.9
7	134678253	AGBL3	0.00595456	0.95	0.31	0.0061	0.012
12	122326812	PSMD9	0.00601906	0.025	0.54	0.0018	0.9
3	194408302	FAM43A	0.00608176	NA	0.57	0.0013	NA
18	23854692	TAF4B	0.00608195	0.24	1	0.022	0.0042
20	23669488	CST4	0.0061	NA	NA	0.0061	NA
1	185267193	IVNS1ABP	0.00620671	0.043	0.00072	0.92	0.8
2	128631565	AMMECR1L	0.0062237	NA	0.7	0.8	0.00022
20	62705874	RGS19	0.00631265	0.006	NA	0.19	0.11
10	84711247	NRG3	0.00631565	0.73	0.71	0.3	0.00015
14	52174899	FRMD6	0.00631871	NA	0.0062	0.45	0.045
11	640265	DRD4	0.00631992	0.14	NA	0.0013	0.69
18	61564394	SERPINB2	0.00633839	0.24	0.31	0.015	0.021
20	62496735	TPD52L2	0.00635216	0.021	0.037	0.055	0.55
22	30887555	SEC14L4	0.00636717	0.74	0.57	0.43	0.00013
4	667173	ATP5I	0.00637616	0.0023	NA	0.34	NA
12	6341823	CD9	0.00641456	0.98	0.3	0.00018	0.45
8	43002207	HGSNAT	0.00643264	0.0016	0.018	1	0.83
7	940181	ADAP1	0.00643389	0.00029	NA	0.82	0.54
1	246714587	TFB2M	0.00649692	0.016	0.22	0.0074	0.93
6	29454816	MAS1L	0.00652798	0.019	0.051	0.68	0.037
5	140762533	PCDHGA7	0.0065476	0.34	0.55	0.77	0.00017
9	36087835	RECK	0.00657601	0.00031	0.61	0.21	0.62
5	162896650	HMMR	0.00658656	0.0003	0.17	0.59	0.82
2	108910712	SULT1C2	0.00661047	0.023	0.0014	0.77	1
19	490040	MADCAM1	0.00661865	0.51	NA	0.0016	NA
11	65649676	CTSW	0.00661961	0.48	0.69	0.00015	0.5
8	17157605	MTMR7	0.00664838	0.091	0.0026	0.8	0.132
2	61415378	USP34	0.0067416	0.19	0.87	0.028	0.0055
6	138752066	NHSL1	0.0067532	0.0045	0.035	0.45	0.36
2	102988526	IL18R1	0.00676917	0.0018	0.79	1	0.018
5	131706028	SLC22A5	0.00681795	0.91	0.71	0.0016	0.025
11	60636633	ZP1	0.00685286	0.00018	0.82	0.41	0.43
14	70839847	SYNJ2BP	0.0068668	0.37	NA	0.0023	NA
4	106639176	GSTCD	0.00688686	0.27	0.49	0.00022	0.9
9	139568280	AGPAT2	0.00694861	NA	0.087	0.0025	0.65
2	136598457	MCM6	0.00699585	0.049	0.025	0.024	0.91
17	2227572	TSR1	0.00710901	0.27	0.5	0.75	0.00027
6	13316805	TBC1D7	0.00712773	0.71	0.46	0.14	0.0006
15	100269365	LYSMD4	0.00715298	0.013	0.31	0.57	0.012
19	7673141	CAMSAP3	0.00716417	0.62	0.91	0.48	0.000102
17	8638499	CCDC42	0.00719993	0.094	0.0043	0.43	0.16
14	69992838	PLEKHD1	0.00727718	0.61	0.41	0.0024	0.047
17	48650063	CACNA1G	0.00727962	0.014	0.63	0.0032	1
19	2276301	C19orf35	0.00728188	0.026	NA	0.035	NA
3	11600807	VGLL4	0.00729819	0.048	0.0054	0.58	NA
14	20711005	OR11H4	0.00735767	0.38	0.063	0.052	0.023
7	101928495	SH2B2	0.0073798	NA	0.0042	0.22	NA
21	43733628	TFF3	0.00739678	0.31	0.96	0.51	0.00019
2	75891858	GCFC2	0.00741506	0.044	0.77	0.014	0.061
17	73695940	SAP30BP	0.00742434	0.16	0.012	0.08	NA
16	57796129	KIFC3	0.00746148	0.21	0.83	0.018	0.0093
1	27250580	NUDC	0.00753975	NA	0.18	0.3	0.0029
7	5642987	FSCN1	0.00756569	0.43	0.16	0.29	0.00149
16	31102589	VKORC1	0.00763063	0.004	NA	0.24	NA
5	74400324	ANKRD31	0.00764458	0.057	0.043	0.3	0.041
2	99170912	INPP4A	0.00764537	0.41	0.73	0.000146	0.69
17	3627347	GSG2	0.007662	0.24	0.015	0.056	0.15
21	45649954	ICOSLG	0.0077	NA	NA	0.0077	NA
7	618938	PRKAR1B	0.00778531	0.77	0.57	0.00032	0.22
14	21249869	RNASE6	0.0078	NA	NA	0.0078	NA
14	25043671	CTSG	0.00783863	NA	0.045	0.022	NA
6	83074734	TPBG	0.00795661	0.0029	0.095	0.15	0.77
14	23344572	LRP10	0.00796796	0.36	0.41	0.9	0.00024
17	37825998	PNMT	0.007985	0.32	0.61	0.91	0.00018
13	106119492	DAOA	0.008	NA	NA	0.008	NA
9	107331464	OR13C8	0.00806959	0.11	0.91	0.18	0.0018
16	90075827	DBNDD1	0.00808518	0.58	0.73	0.00012	0.64
10	124175436	PLEKHA1	0.00810096	0.47	0.046	0.0029	0.52
15	76017452	ODF3L1	0.00819783	0.41	0.26	0.0037	0.084
4	44682767	GUF1	0.00822867	1	0.75	0.37	0.00012
20	62340115	ZGPAT	0.00826425	0.7	0.058	0.33	0.0025
20	139456	DEFB127	0.00827934	NA	0.62	0.0017	NA
11	61179392	CPSF7	0.0084	NA	NA	0.0084	NA
1	145415273	HFE2	0.00840669	0.57	0.21	0.0015	NA
6	53133964	ELOVL5	0.00845713	0.77	0.024	0.0085	0.22
17	60469326	EFCAB3	0.00847923	0.34	0.12	0.0017	0.5
9	140450001	WDR85	0.00849168	0.0055	0.81	0.065	0.12
7	5982996	RSPH10B	0.00859369	0.55	NA	0.002	NA
1	161044549	PVRL4	0.00859857	0.99	0.05	0.0051	0.14
17	26976071	SDF2	0.00863455	0.079	NA	0.014	NA
15	76452476	C15orf27	0.00864	0.049	0.25	0.24	0.0121
2	242129524	ANO7	0.00866316	0.49	0.92	0.22	0.00036
12	110207078	FAM222A	0.00866546	0.59	0.92	0.047	0.0014
22	23950955	C22orf43	0.0089945	0.95	0.39	0.0026	0.039
12	122326812	RP11-87C12.2	0.00903214	0.00058	0.14	0.47	0.99
8	16921605	EFHA2	0.00905488	NA	0.0073	0.16	NA
7	142836203	PIP	0.00910106	0.74	0.49	0.000112	0.94
16	30793621	ZNF629	0.00910397	0.0128	0.96	0.0037	0.84
2	88472791	THNSL2	0.00912377	0.4	0.57	0.14	0.0012
12	55945258	OR6C4	0.00914059	0.00032	1	0.24	0.5
7	780456	HEATR2	0.00914597	0.7	0.00031	0.23	0.77
16	2282198	E4F1	0.00916594	0.46	0.93	0.00017	0.53
17	15611546	AC005324.8-001	0.00917966	0.66	0.76	0.035	0.0022
12	66546100	TMBIM4	0.00934915	0.74	0.49	0.039	0.0028
14	56757104	PELI2	0.00934985	0.2	0.25	0.0012	0.66
1	31769528	SNRNP40	0.00945802	0.31	0.0016	0.42	NA
5	37108520	C5orf42	0.00949973	0.74	0.14	0.00062	0.63
6	136882715	MAP3K5	0.00953445	0.46	0.00061	0.75	NA
22	17446157	GAB4	0.00956744	0.033	0.42	0.0044	0.67
17	74003846	EVPL	0.00957768	0.086	0.12	0.0061	0.65
19	18675825	KXD1	0.00959239	NA	0.52	0.0024	NA
16	88493940	ZNF469	0.0096478	0.36	0.19	0.57	0.00106
13	52343310	DHRS12	0.00965944	0.016	0.12	0.98	0.022
3	146251266	PLSCR1	0.00969847	0.47	0.41	0.18	0.0012
14	105167807	INF2	0.0097996	0.59	0.00016	0.86	0.52
19	55556527	RDH13	0.0098211	NA	0.68	0.51	0.00063
3	2908513	CNTN4	0.00989648	0.17	0.11	0.088	0.026
1	41512115	SCMH1	0.00995243	0.103	0.023	0.035	0.52
11	89947246	CHORDC1	0.01	NA	NA	0.01	NA
16	18841642	SMG1	0.0100253	NA	0.005	0.065	0.69
19	17000414	F2RL3	0.0100718	NA	0.2	0.0066	NA
20	3669165	SIGLEC1	0.010095	0.64	0.053	0.24	0.0054
2	44457558	PPM1B	0.0101049	0.53	NA	0.0025	NA
7	6449496	DAGLB	0.0102596	0.43	0.00058	0.53	0.34
20	31596430	BPIFB2	0.0102627	NA	0.15	0.014	0.11
4	85525406	CDS1	0.0102852	0.084	0.132	0.0049	0.83
17	15611546	ZNF286A	0.0103185	0.66	0.76	0.043	0.0021
22	20800848	KLHL22	0.0103314	0.13	0.64	0.0028	NA
19	19625992	TSSK6	0.0104155	NA	0.14	0.0098	NA
15	52427943	GNB5	0.0104342	1	0.9	0.7	7.3e-05
2	37443294	CEBPZ	0.0104426	0.03	0.98	0.54	0.0029
19	40095249	LGALS13	0.0104864	0.7	0.21	0.15	0.0021
19	54722250	LILRB3	0.0105	0.0105	NA	NA	NA
10	75896420	AP3M1	0.0105019	0.0075	0.76	0.022	0.37
2	125204348	CNTNAP5	0.0105679	0.74	0.051	0.31	0.004
3	149290675	WWTR1	0.010605	0.32	0.56	0.64	0.00041
2	172291650	DCAF17	0.0106058	0.0022	0.91	0.027	0.87
13	41508049	ELF1	0.0106461	0.46	0.93	0.013	0.0085
17	80789037	ZNF750	0.0106805	0.18	0.0109	0.11	0.22
17	27225611	DHRS13	0.0107474	0.101	0.97	0.0025	NA
16	8953028	CARHSP1	0.0107736	0.21	0.22	0.8	0.0013
3	10146036	C3orf24	0.0107742	0.07	0.27	0.013	NA
2	172823030	HAT1	0.0108	0.0108	NA	NA	NA
12	13237998	GSG1	0.0108138	0.019	0.52	0.0104	0.47
5	138378394	SIL1	0.0108341	0.00131	0.44	0.21	0.4
11	45931647	PEX16	0.0108621	0.096	NA	0.015	NA
6	30154049	TRIM26	0.0109526	0.12	0.79	0.00064	0.81
8	79598772	ZC2HC1A	0.0109912	0.00067	0.37	0.24	0.83
5	179529124	RASGEF1C	0.0110021	0.83	0.4	0.00076	NA
7	38424430	AMPH	0.0111376	0.97	0.108	0.00048	1
15	91448591	MAN2A2	0.0112677	0.69	0.21	0.00043	0.82
2	74787273	C2orf65	0.0113676	0.18	0.65	0.0026	0.17
9	96080699	C9orf129	0.0113833	0.8	NA	0.0019	NA
3	195965653	PCYT1A	0.0114496	0.79	0.14	0.0024	NA
15	45412435	DUOXA1	0.0114692	0.022	0.026	0.104	0.88
17	8046147	PER1	0.0114837	0.012	0.038	0.23	0.5
18	77170477	NFATC1	0.0115423	0.082	0.0023	0.28	1
10	17275861	VIM	0.0115583	0.91	NA	0.0017	NA
20	57598808	TUBB1	0.0115668	0.13	0.3	0.0014	0.97
12	21624546	RECQL	0.0115842	0.6	0.63	0.52	0.00027
13	96506633	UGGT2	0.0115887	0.69	0.22	0.053	0.0066
9	140109141	NDOR1	0.0116082	0.00022	0.84	0.64	0.45
2	211159061	MYL1	0.0116666	0.42	0.62	0.49	0.00042
17	64685078	PRKCA	0.0116744	0.65	0.0161	0.026	NA
4	4242132	TMEM128	0.0117071	0.0045	0.082	0.74	NA
13	111268063	CARKD	0.0117538	0.39	0.56	0.67	0.00037
12	57132236	PRIM1	0.0118167	0.69	NA	0.0023	NA
9	96860142	PTPDC1	0.0118243	0.68	0.47	0.61	0.00028
6	28350388	ZSCAN12	0.0118421	0.14	0.0033	0.32	0.37
6	32407773	HLA-DRA	0.0119004	0.04	NA	0.04	NA
1	12907457	HNRNPCL1	0.012	0.012	NA	NA	NA
12	12509865	LOH12CR2	0.012	0.012	NA	NA	NA
14	37050577	NKX2-8	0.012	NA	NA	0.012	NA
3	142769891	U2SURP	0.012	0.012	NA	NA	NA
19	58549337	ZSCAN1	0.0120148	0.00042	0.22	0.61	0.99
20	23472459	CST8	0.0120612	NA	0.025	0.065	NA
9	123165239	CDK5RAP2	0.0120905	0.082	0.24	0.22	0.013
20	1456970	SIRPB2	0.0121004	0.58	0.0066	0.023	0.64
19	3531959	FZR1	0.0121129	NA	0.21	0.097	0.014
20	56078504	CTCFL	0.0121132	0.19	0.0022	0.25	0.54
2	211301100	LANCL1	0.0121717	0.51	0.034	0.052	0.063
1	19208193	RP13-279N23.2	0.0121736	0.24	0.89	0.00038	0.7
10	92503400	HTR7	0.0122137	0.13	0.028	0.016	0.98
11	6007272	OR52L1	0.0123458	0.023	0.48	0.0053	0.99
13	48571013	SUCLA2	0.0123472	0.71	0.34	0.16	0.0015
11	2185557	TH	0.0123499	0.44	0.21	0.00064	0.98
3	142840775	CHST2	0.0123582	0.104	0.083	0.56	0.012
11	93469413	TAF1D	0.0123977	0.016	0.63	0.017	0.34
10	91198917	SLC16A12	0.0123977	0.0016	0.54	0.34	NA
5	141694021	SPRY4	0.0125563	0.18	0.61	0.2	0.0027
19	48715196	CARD8	0.0125713	0.58	0.92	0.053	0.0021
15	90794102	TTLL13	0.0126066	0.47	0.0059	0.086	0.25
17	40651060	ATP6V0A1	0.0126196	0.64	0.46	0.0052	0.039
11	67400566	TBX10	0.0126515	0.0117	0.13	0.39	0.101
5	153372564	FAM114A2	0.0127194	NA	NA	0.0024	0.72
6	49439805	CENPQ	0.0127287	0.41	0.39	0.0019	NA
6	116599859	TSPYL1	0.0127932	0.78	0.0078	0.025	0.4
1	117944822	MAN1A2	0.0128592	0.007	NA	0.25	NA
12	33529788	SYT10	0.012891	NA	0.015	0.117	NA
9	3225104	RFX3	0.0129962	0.076	0.054	0.15	0.101
21	45548437	AP001055.7	0.013	NA	NA	0.013	NA
13	107211797	ARGLU1	0.013	NA	NA	0.013	NA
10	104210861	C10orf95	0.013	NA	NA	0.013	NA
6	153323570	MTRF1L	0.013	NA	0.013	NA	NA
2	159663599	DAPL1	0.0130256	0.11	0.018	0.7	0.045
14	101195335	DLK1	0.0130761	0.8	0.86	0.93	9.8e-05
15	50833350	USP50	0.01308	0.0017	0.25	0.18	0.82
1	6324747	ACOT7	0.0130902	0.0123	0.32	0.08	NA
2	70074757	GMCL1	0.0132012	NA	0.041	0.044	NA
12	91357976	EPYC	0.0132185	0.6	0.029	0.118	0.031
9	125281780	OR1J4	0.0132707	NA	0.55	0.0033	NA
15	51634150	GLDN	0.0132851	0.3	0.39	0.066	0.0083
1	40310221	TRIT1	0.013291	0.041	0.9	0.0022	0.79
2	233391306	CHRND	0.013294	0.45	0.36	0.00045	0.88
9	140322570	NOXA1	0.013313	0.055	0.31	0.029	0.13
22	19026403	DGCR2	0.0133775	0.7	0.62	0.00021	0.71
1	2106723	PRKCZ	0.0134331	0.89	0.69	0.00053	NA
5	145464081	PLAC8L1	0.0134472	NA	0.97	0.0019	NA
15	72122642	MYO9A	0.0134634	0.029	0.67	0.14	0.024
3	61975382	PTPRG	0.013475	0.14	0.83	0.75	0.00075
16	30999142	HSD3B7	0.0134811	0.86	0.78	0.65	0.00015
15	62146742	VPS13C	0.0135491	0.74	0.89	0.2	0.0005
14	52473372	NID2	0.0135734	0.39	0.57	0.33	0.0009
12	6604278	NCAPD2	0.0135932	0.93	0.076	0.0012	0.78
22	40417943	FAM83F	0.0135933	0.85	0.69	0.024	0.0047
7	30791847	INMT-FAM188B	0.0136931	0.91	0.9	0.16	0.00051
11	73686548	UCP2	0.0137112	0.0065	NA	0.29	NA
1	92161298	TGFBR3	0.0137454	0.0013	0.8	0.17	0.38
12	235022	IQSEC3	0.0138019	0.0054	0.39	0.16	NA
1	246907377	SCCPDH	0.0138658	0.17	0.25	0.32	0.005
17	18022937	MYO15A	0.0139309	0.2	0.0061	0.11	0.51
3	100093896	TOMM70A	0.0139708	0.47	0.0005	0.43	0.68
13	77566090	CLN5	0.0141802	0.14	NA	0.014	NA
19	39292689	LGALS4	0.0141945	0.41	0.89	0.25	0.00077
11	55999737	OR5T2	0.0143627	0.14	0.012	0.25	0.17
11	4608061	OR52I2	0.0145	NA	NA	0.0145	NA
20	18471068	RBBP9	0.0145286	0.096	NA	0.021	NA
17	40010070	KLHL11	0.0145297	0.0013	0.67	0.17	0.49
12	123214372	HCAR1	0.0145389	0.57	0.49	0.05	0.0052
3	134256110	CEP63	0.0145814	0.97	0.87	0.00012	0.72
4	54344855	LNX1	0.0147112	0.37	0.014	0.075	0.19
16	66919667	PDP2	0.0149543	0.98	0.32	0.00043	0.56
19	58199291	AC004017.1	0.015	0.015	NA	NA	NA
10	90524237	LIPN	0.015006	0.13	0.48	0.76	0.0016
3	3170697	TRNT1	0.0150903	0.18	0.0038	0.13	0.86
16	88889114	GALNS	0.0151478	0.48	0.026	0.028	0.22
3	133467337	TF	0.0151528	0.0019	0.22	0.2	0.92
16	67228590	E2F4	0.0152248	0.7	0.13	0.0042	NA
3	187446211	BCL6	0.0152501	0.04	0.097	1	0.02
1	55014013	ACOT11	0.0153164	0.29	0.098	0.41	0.0067
12	102147154	GNPTAB	0.0153629	0.16	0.14	0.014	0.25
2	74058016	STAMBP	0.0154383	0.025	0.092	0.039	0.88
15	85525556	PDE8A	0.0154657	0.015	0.13	0.2	NA
12	95451388	NR2C1	0.0156094	0.71	0.014	0.0096	0.84
22	31032704	SLC35E4	0.0156126	0.8	0.96	0.87	0.00012
7	138732457	ZC3HAV1	0.0156889	0.93	0.69	0.0034	0.037
20	10386013	MKKS	0.0157156	0.38	0.063	0.26	0.013
18	57103297	CCBE1	0.0157226	0.3	0.68	0.00063	0.63
15	89442606	MFGE8	0.0158391	0.32	0.22	0.83	0.0014
2	99938565	TXNDC9	0.0158711	0.29	0.068	0.016	0.26
9	139847446	LCN12	0.0159173	0.26	0.8	0.0018	0.22
4	10445207	ZNF518B	0.0159432	0.54	0.012	0.013	0.98
12	121454148	C12orf43	0.0159726	0.48	0.69	0.51	0.00049
11	13402787	ARNTL	0.016	NA	NA	0.016	NA
19	1244381	ATP5D	0.016	NA	NA	0.016	NA
6	45882076	CLIC5	0.0160579	NA	0.48	0.00104	0.82
1	24201357	CNR2	0.016078	0.71	0.38	0.043	0.0072
3	50614965	HEMK1	0.0161338	0.024	0.033	0.52	NA
19	15052665	OR7C2	0.0161384	0.0034	NA	0.67	NA
12	124156614	TCTN2	0.0161458	0.11	0.41	0.81	0.0023
3	112724619	C3orf17	0.0161505	0.4	0.079	0.19	0.014
16	88643633	ZC3H18	0.0161684	0.59	0.98	0.26	0.00056
17	1371376	MYO1C	0.0161982	0.58	0.57	0.069	0.0037
14	69787589	GALNTL1	0.0161989	0.49	0.27	0.11	0.0058
21	42694870	FAM3B	0.0162964	NA	NA	0.24	0.0096
20	30053322	DEFB124	0.0163045	0.013	0.105	0.16	0.39
10	44052903	ZNF239	0.016323	NA	0.0067	0.48	0.13
12	52708420	KRT83	0.0164116	0.74	0.044	0.024	0.11
17	35872409	DUSP14	0.0164527	NA	0.57	0.39	0.0019
1	7869953	PER3	0.0164837	0.11	0.42	0.039	0.048
9	95874559	C9orf89	0.0165476	0.11	0.15	0.085	0.062
7	84628989	SEMA3D	0.0165518	0.65	0.68	0.24	0.00082
6	33245441	B3GALT4	0.0166117	NA	NA	0.76	0.0031
17	706933	NXN	0.0166163	0.0015	0.31	0.92	NA
10	97583002	ENTPD1	0.0166591	0.19	0.59	0.29	0.0027
19	12800597	FBXW9	0.0166599	0.75	0.076	0.0035	0.44
9	37692739	FRMPD1	0.0167032	0.69	0.84	0.8	0.00019
7	140710396	MRPS33	0.0167447	NA	NA	0.58	0.0041
7	24839891	OSBPL3	0.0167483	0.0109	0.35	0.061	0.38
21	47766113	PCNT	0.0167695	0.17	0.31	0.41	0.0041
21	47402620	COL6A1	0.0169408	0.4	0.27	0.16	0.0052
1	6528589	PLEKHG5	0.0169965	0.17	0.6	0.59	0.0015
17	78968905	CHMP6	0.017	0.017	NA	NA	NA
5	40764876	PRKAA1	0.017	NA	NA	NA	0.017
2	39216456	SOS1	0.0170248	1	0.13	0.012	0.058
19	57760018	ZNF805	0.017109	0.17	0.28	0.0022	0.87
17	66246353	AMZ2	0.0171726	0.31	NA	0.0079	NA
1	15420859	KAZN	0.0172638	0.4	0.064	0.0053	0.68
15	90610546	ZNF710	0.0172899	0.23	0.22	0.0089	NA
1	156437816	MEF2D	0.0173052	0.00079	0.93	0.7	0.18
10	72535007	TBATA	0.0173174	0.054	0.75	0.26	0.0088
1	109315291	STXBP3	0.0173887	NA	NA	0.35	0.0071
22	37966649	LGALS2	0.0174665	0.013	NA	0.27	0.13
6	96976483	UFL1	0.0174944	0.00019	0.75	0.97	0.68
1	163117163	RGS5	0.0174985	0.99	NA	0.033	0.014
18	22048821	HRH4	0.0175463	NA	0.9	0.03	0.017
17	41169899	VAT1	0.0175678	0.3	0.57	0.97	0.00057
5	65892767	MAST4	0.0177519	0.88	0.79	0.0006	0.23
10	119774577	RAB11FIP2	0.0178277	0.00017	0.76	0.83	0.9
7	92027537	ANKIB1	0.017843	0.58	0.14	0.34	0.0035
14	20924167	APEX1	0.0178487	0.0038	1	0.048	0.53
1	43638436	WDR65	0.0178649	0.098	0.83	0.35	0.0034
14	100847338	WDR25	0.0178674	0.49	0.79	0.41	0.00061
1	154184993	C1orf43	0.0179436	NA	0.42	0.0025	0.45
20	47734885	STAU1	0.0179627	NA	NA	0.0029	0.89
11	48510435	OR4A47	0.018	0.018	NA	NA	NA
16	2215901	TRAF7	0.018	NA	NA	0.018	NA
22	18640503	USP18	0.018	NA	NA	0.018	NA
17	72691263	CD300LF	0.0181334	0.48	0.39	0.00088	0.6
17	61843418	CCDC47	0.0182975	0.25	0.14	0.11	0.026
12	48596241	OR10AD1	0.0183165	0.108	0.0035	0.34	0.78
7	195594	FAM20C	0.0183222	NA	0.29	0.018	0.093
19	45567648	CLASRP	0.0185431	0.11	0.61	0.0095	0.16
3	184099050	CHRD	0.0185875	0.16	0.82	0.039	0.02
1	57333311	C8A	0.0186203	0.36	0.23	0.0021	0.59
15	89056292	DET1	0.0187533	0.76	0.38	0.78	0.00046
7	20418829	ITGB8	0.0187583	NA	0.026	0.77	0.025
3	42445617	LYZL4	0.01881	0.0133	0.58	0.019	0.71
4	175413228	HPGD	0.0188818	NA	NA	0.0072	0.38
14	34266771	NPAS3	0.018943	0.41	0.27	0.094	0.0101
16	66945947	CDH16	0.0189557	0.69	0.0022	0.63	0.11
2	211060050	ACADL	0.0189644	NA	0.025	0.11	NA
2	37353472	EIF2AK2	0.019	NA	NA	0.019	NA
1	151739679	OAZ3	0.019	NA	NA	0.019	NA
11	56344260	OR5M10	0.019	NA	NA	0.019	NA
22	31501206	RP3-412A9.11	0.019	0.019	NA	NA	NA
5	150275777	ZNF300	0.019	NA	NA	0.019	NA
20	62191282	RP4-697K14.7	0.0190178	0.11	0.21	0.61	0.0075
9	131585069	C9orf114	0.0190454	0.51	0.046	0.0074	0.61
19	53014346	ZNF578	0.0190941	0.28	NA	0.0099	NA
19	2916111	ZNF57	0.019206	0.02	0.123	0.044	0.99
1	158532447	OR6P1	0.0192799	0.22	0.014	0.053	0.66
8	134232908	WISP1	0.0193179	0.3	0.81	0.78	0.00057
11	3849236	RHOG	0.0193235	0.8	0.69	0.00022	0.89
14	93649713	MOAP1	0.0193431	0.048	0.43	0.0076	0.69
19	11040127	C19orf52	0.0193461	NA	0.16	0.0037	0.88
20	42086724	SRSF6	0.0193826	0.96	0.34	0.0016	NA
19	55879672	IL11	0.0194227	0.4	0.00084	0.81	0.4
19	49079224	SULT2B1	0.0194354	0.69	0.47	0.016	0.021
1	68171235	GNG12	0.0194819	0.0033	NA	0.86	NA
11	4944650	OR51G1	0.0195441	0.48	0.8	0.0026	0.11
17	42786711	DBF4B	0.0195671	NA	0.91	0.0007	0.83
1	16069525	TMEM82	0.0195796	0.44	0.17	0.23	0.0064
15	43568715	TGM7	0.0195923	0.54	0.0049	0.119	0.35
11	64666182	ATG2A	0.0196281	0.099	0.0066	0.19	0.89
15	90763025	SEMA4B	0.0196349	0.47	0.014	0.14	0.12
3	14174077	TMEM43	0.019636	0.038	0.0044	0.76	0.87
12	12301898	LRP6	0.0196772	0.028	0.55	0.015	0.48
10	104159215	NFKB2	0.0196772	0.11	0.8	0.0028	0.45
12	122092181	MORN3	0.0197237	0.43	0.88	0.21	0.0014
19	6754093	SH2D3A	0.0197289	0.02	0.78	0.87	0.0082
8	67341714	RRS1	0.0197406	0.51	0.39	0.016	0.035
1	213146292	VASH2	0.0197406	0.021	0.6	0.013	0.68
20	54824029	MC3R	0.0197779	0.42	NA	0.0111	0.115
11	124967615	TMEM218	0.0197934	0.0015	0.44	0.22	0.77
3	49947766	MON1A	0.0198942	0.016	0.69	0.3	0.034
20	1424531	NSFL1C	0.0199633	0.92	0.15	0.02	0.041
6	26104280	HIST1H4C	0.02	0.02	NA	NA	NA
11	2972505	NAP1L4	0.02	NA	NA	0.02	NA
11	65617501	SNX32	0.02	NA	NA	0.02	NA
16	23568637	UBFD1	0.02	0.02	NA	NA	NA
13	80095078	NDFIP2	0.0200742	0.024	0.24	0.11	0.18
11	128772601	C11orf45	0.0201145	0.86	0.31	0.00066	0.65
11	48131618	PTPRJ	0.0201497	0.62	0.98	0.0051	0.037
1	23110905	EPHB2	0.0202587	0.7	0.121	0.0031	0.44
19	42265357	CEACAM6	0.0202931	0.28	0.94	0.022	0.02
1	214454770	SMYD2	0.0203201	0.0017	0.25	0.3	0.91
15	49030841	CEP152	0.0203695	0.0077	0.12	0.42	0.3
8	38002823	STAR	0.0204888	0.93	0.28	0.00046	0.98
3	54958763	LRTM1	0.0205405	0.016	0.32	0.11	NA
6	108029194	SCML4	0.0205668	0.0048	NA	0.63	NA
6	29364508	OR12D2	0.0206479	0.019	0.091	0.104	0.66
4	121631559	PRDM5	0.0206479	NA	0.49	0.0062	NA
4	177036945	WDR17	0.020716	0.46	0.15	0.054	0.032
1	169695870	SELE	0.0207343	0.77	0.012	0.068	0.19
14	45403616	KLHL28	0.0207687	0.27	0.17	0.0033	0.79
21	43767595	TFF2	0.0207754	NA	NA	0.36	0.0085
11	119210380	C1QTNF5	0.020839	NA	NA	0.83	0.0037
4	8021340	ABLIM2	0.0209132	0.19	0.53	0.0015	0.8
6	5369126	FARS2	0.02093	0.0015	0.47	0.66	0.26
14	24658776	RP11-468E2.2	0.0209836	0.0043	NA	0.72	NA
7	71571137	CALN1	0.0210529	0.42	NA	0.0074	NA
12	11090879	TAS2R14	0.0210529	NA	0.84	0.0037	NA
22	20043504	C22orf25	0.0210616	NA	0.023	0.23	0.11
11	55135435	OR4A15	0.0210977	NA	0.2	0.0036	0.81
2	54844790	SPTBN1	0.0211155	0.8	0.77	0.00163	0.122
6	153296052	FBXO5	0.0211707	0.49	0.4	0.051	0.0123
15	78466006	ACSBG1	0.0211725	0.47	0.51	0.019	0.027
6	72678766	RIMS1	0.0211767	0.8	0.15	0.0025	0.41
19	52934741	ZNF534	0.0212331	0.00027	0.67	0.91	0.75
3	142542415	PCOLCE2	0.021272	0.97	0.97	0.143	0.00092
15	101464717	LRRK1	0.0212787	0.43	0.15	0.003	0.64
11	122848541	BSX	0.0212944	0.5	0.43	0.93	0.00062
20	42885925	GDAP1L1	0.0212951	NA	0.21	0.015	NA
1	162351752	C1orf226	0.0213119	NA	0.067	0.49	0.018
8	71619238	XKR9	0.0213206	0.98	0.24	0.0016	0.33
13	114323997	GRK1	0.0214061	0.0012	0.59	0.84	0.21
1	223905532	CAPN2	0.0214183	0.7	0.62	0.0018	0.16
1	169563951	SELP	0.0215145	0.00059	0.52	1	0.41
13	114078558	ADPRHL1	0.0215271	0.76	0.087	0.0056	0.34
16	12758966	CPPED1	0.0216905	0.43	0.62	0.43	0.00111
1	153390626	S100A7A	0.0216992	0.5	NA	0.0022	0.55
13	73340177	DIS3	0.0217654	0.24	0.45	0.0016	0.74
2	216861171	MREG	0.0217771	0.17	0.17	0.0108	0.41
11	55798145	OR5AS1	0.0217925	NA	0.39	0.03	0.052
19	12637384	ZNF564	0.0218123	NA	0.072	0.045	NA
22	45681971	UPK3A	0.0218719	0.0029	0.75	0.37	0.16
20	42143694	L3MBTL1	0.0218819	0.64	0.00039	0.58	0.89
4	87809020	C4orf36	0.0219411	0.37	NA	0.0021	0.79
17	48460399	LRRC59	0.022	NA	NA	0.022	NA
3	50386402	NPRL2	0.022	0.022	NA	NA	NA
1	89206740	PKN2	0.022	NA	NA	0.022	NA
3	4403908	SUMF1	0.0220005	0.56	0.44	0.0025	NA
17	57682972	DHX40	0.0220985	0.0094	NA	0.35	NA
1	224371065	DEGS1	0.0221297	0.057	0.22	0.012	0.87
10	134219379	PWWP2B	0.0222486	0.07	0.19	0.047	NA
19	35449082	ZNF792	0.022294	0.75	0.00084	0.35	0.6
1	158669740	OR6K2	0.0223057	NA	0.35	0.064	0.028
1	9064814	SLC2A7	0.0223419	0.0066	0.69	0.47	0.062
19	56693562	GALP	0.0224742	0.38	0.8	0.0062	0.071
1	114438448	AP4B1	0.0224778	0.37	0.034	0.56	0.019
11	18158958	MRGPRX3	0.0224855	0.22	0.0067	0.43	NA
11	61099151	DDB1	0.0225399	0.67	NA	0.73	0.0013
1	145704167	CD160	0.0225625	0.2	0.89	0.0018	0.42
3	139237264	RBP1	0.0225833	NA	0.0075	0.45	NA
11	17118687	PIK3C2A	0.022642	NA	0.41	0.065	0.024
1	240070944	CHRM3	0.0227648	0.93	0.0024	0.086	0.71
9	33750845	PRSS3	0.0227691	0.46	0.72	0.98	0.00042
8	71033566	NCOA2	0.022791	0.87	0.041	0.0043	0.89
1	67474795	SLC35D1	0.0229121	0.00059	0.94	0.31	0.8
16	57546739	CCDC102A	0.0229193	0.88	0.73	0.00034	0.63
14	23587838	CEBPE	0.022998	NA	0.24	0.068	0.04
5	175926081	FAF2	0.023	NA	NA	0.023	NA
15	78582044	WDR61	0.023	0.023	NA	NA	NA
19	9801052	ZNF812	0.0230101	0.84	0.156	0.24	0.0044
1	177242718	FAM5B	0.0230504	NA	0.015	0.045	0.97
1	93965129	FNBP1L	0.0230706	0.015	0.19	0.23	NA
12	56142670	GDF11	0.0231551	1	0.75	0.104	0.00179
1	154991066	DCST2	0.0232913	0.0078	0.38	0.19	0.25
8	126021414	SQLE	0.0233037	0.62	0.83	0.74	0.00037
2	55054839	EML6	0.0233202	0.99	0.64	0.00053	0.42
15	94841430	MCTP2	0.0233363	0.0012	0.36	0.43	0.76
4	25664351	SLC34A2	0.023337	0.19	0.51	0.47	0.0031
8	53030923	ST18	0.0233456	0.083	0.61	0.003	0.93
17	33802156	SLFN12L	0.0233902	0.43	0.18	0.0061	0.3
1	155290783	RUSC1	0.0234653	0.31	0.36	0.0017	0.75
16	1827133	SPSB3	0.0234903	0.21	0.26	0.87	0.003
2	74757348	HTRA2	0.0235772	0.76	0.63	0.68	0.00044
19	51480829	KLK7	0.0235861	NA	0.0096	0.37	NA
2	10904524	ATP6V1C2	0.0237708	0.61	0.3	0.022	0.036
14	105395274	PLD4	0.0237712	0.76	NA	0.039	0.023
4	42457348	ATP8A1	0.0238729	0.35	0.042	0.062	0.16
2	27315225	KHK	0.0239281	0.00061	0.44	0.79	0.69
8	27320526	CHRNA2	0.0239677	0.67	0.16	0.18	0.0076
12	58197363	AVIL	0.0239809	0.28	0.24	0.39	0.0056
19	36940622	ZNF566	0.0239982	NA	0.0069	0.82	0.122
1	117249108	C1orf137	0.024	0.024	NA	NA	NA
20	14306361	FLRT3	0.024	NA	NA	0.024	NA
19	54599119	OSCAR	0.024	NA	NA	0.024	NA
5	176079877	TSPAN17	0.024	NA	NA	0.024	NA
20	1099523	PSMF1	0.0240997	0.66	0.43	0.00056	0.93
12	113645362	IQCD	0.024292	0.27	0.19	0.94	0.0031
5	156770117	FNDC9	0.0242949	0.31	0.35	0.26	0.0053
9	135139826	SETX	0.024323	0.024	0.16	0.26	0.15
3	186383945	HRG	0.0243929	0.0045	0.053	0.65	0.97
19	2210778	DOT1L	0.0244707	0.28	0.83	0.0026	0.25
10	104119123	GBF1	0.0246017	0.27	0.81	0.24	0.0029
4	8376719	ACOX3	0.0246804	0.29	0.52	0.039	0.026
17	56598656	2020-09-04	0.0247234	0.105	0.014	0.132	0.79
4	90169658	GPRIN3	0.0247318	0.101	0.74	0.0076	0.27
17	38027030	ZPBP2	0.0247497	0.29	0.073	0.0074	0.98
17	29298304	RNF135	0.0247796	0.13	0.26	0.013	0.35
11	55761182	OR5F1	0.0248056	0.52	0.064	0.089	0.052
1	156500096	IQGAP3	0.0248799	0.46	0.46	0.017	0.043
1	247006051	AHCTF1	0.0248938	0.82	0.036	0.76	0.0069
9	132591560	C9orf78	0.0249316	0.36	0.56	0.0036	NA
11	4406607	TRIM21	0.0249446	0.65	0.77	0.00033	0.94
11	46625172	HARBI1	0.0249828	0.41	0.22	0.0138	0.125
20	55048429	C20orf43	0.025	NA	NA	0.025	NA
11	64074743	ESRRA	0.025	0.025	NA	NA	NA
22	35658407	HMGXB4	0.025	NA	NA	0.025	NA
9	136233510	SURF4	0.025	NA	NA	0.025	NA
7	108205125	THAP5	0.025	NA	NA	0.025	NA
20	59829904	CDH4	0.0250132	0.0036	0.88	0.082	0.6
3	183774762	HTR3C	0.0250835	0.63	0.06	0.23	0.018
11	58978684	MPEG1	0.0250835	0.23	0.21	0.27	0.012
2	149798512	KIF5C	0.0251215	0.44	0.49	0.0034	NA
12	56398471	SUOX	0.0251646	0.68	0.0017	0.17	0.8
9	139390585	NOTCH1	0.0251682	0.18	0.21	0.026	0.16
5	71739602	ZNF366	0.0253848	0.91	0.49	0.00042	0.85
6	42153428	GUCA1B	0.0254659	0.36	NA	0.0108	NA
9	91083288	SPIN1	0.0254843	0.29	0.25	0.92	0.0024
9	136501728	DBH	0.0256232	0.97	0.008	0.033	0.63
5	141021294	FCHSD1	0.0256891	0.33	0.58	0.47	0.0018
15	71124471	LARP6	0.0256984	0.0113	0.027	0.9	0.59
11	65361256	KCNK7	0.0257403	NA	1	0.87	0.00087
6	29911183	HLA-A	0.0258095	0.79	NA	0.005	NA
18	9944924	VAPA	0.0258332	0.0039	0.75	0.26	NA
7	76019590	SRCRB4D	0.0258363	0.14	0.39	0.13	0.023
1	204170825	GOLT1A	0.0259998	0.3	0.44	0.026	0.048
5	79949873	DHFR	0.026	0.026	NA	NA	NA
21	47918662	DIP2A	0.0260343	0.94	0.0048	0.59	0.062
2	128471186	WDR33	0.0260463	0.0044	0.68	0.08	0.69
19	49977929	FLT3LG	0.0260969	NA	0.58	NA	0.0069
6	155450649	TIAM2	0.0261227	0.053	0.61	0.19	0.027
3	88199298	C3orf38	0.0261258	0.00126	0.53	0.27	0.92
15	75890934	SNUPN	0.0261414	0.026	0.43	0.99	0.015
9	131583067	ENDOG	0.0261852	NA	NA	0.49	0.0082
1	109656946	KIAA1324	0.0263925	0.91	0.34	0.32	0.0017
5	89913740	GPR98	0.026439	0.24	0.042	0.031	0.54
1	41482976	SLFNL1	0.026439	0.81	0.96	0.062	0.0035
11	123777296	OR8D4	0.0264488	0.00031	0.93	0.96	0.61
1	16385131	FAM131C	0.0265268	0.17	NA	0.024	NA
1	55541174	USP24	0.0267246	0.68	0.012	0.7	0.03
19	52468136	ZNF350	0.0267685	0.038	0.78	0.95	0.0061
10	16870803	CUBN	0.0267943	0.028	0.84	0.0103	0.71
20	44171455	SPINLW1-WFDC6	0.0268365	0.031	0.83	0.0067	1
8	10530197	C8orf74	0.0268989	0.017	0.57	0.35	0.051
9	106860779	SMC2	0.0269459	0.6	0.17	1	0.0017
11	5423977	OR51J1	0.027	0.027	NA	NA	NA
17	38545824	TOP2A	0.0270952	0.38	0.0076	0.089	0.68
12	52629060	KRT7	0.0271936	0.76	0.71	0.0044	0.074
15	69709740	KIF23	0.0272063	0.39	0.14	0.7	0.0046
3	43121410	GTDC2	0.0272503	NA	0.2	0.12	0.034
11	111856033	DIXDC1	0.0272506	0.9	0.00074	0.98	0.27
10	71164655	TACR2	0.0273103	0.061	0.46	0.18	0.035
20	62187187	C20orf195	0.0273311	0.16	0.016	0.32	NA
11	68747507	MRGPRD	0.0273369	0.27	0.0015	0.47	0.93
4	76785594	PPEF2	0.0274243	0.12	0.19	0.012	0.65
9	139840215	C8G	0.0274414	0.66	0.0049	0.43	0.128
22	44280225	PNPLA5	0.0274905	0.052	0.58	0.97	0.0061
7	142919509	TAS2R40	0.0274913	0.76	NA	0.0056	NA
1	92428495	BRDT	0.0275786	0.4	0.006	0.09	0.83
8	131072829	ASAP1	0.027594	0.42	0.24	0.89	0.002
6	36098410	MAPK13	0.0276906	0.82	0.68	0.00049	0.66
20	43541307	PABPC1L	0.0277098	0.87	0.028	0.65	0.0114
1	24175151	FUCA1	0.0277171	0.032	0.33	0.38	0.045
19	58483860	C19orf18	0.0277656	0.79	0.48	0.00077	0.62
12	7456988	ACSM4	0.0277872	0.92	0.54	0.96	0.00038
1	95699811	RWDD3	0.0278402	NA	0.024	0.18	NA
11	5878609	OR52E8	0.0278702	0.0067	0.17	0.34	0.47
9	33240216	SPINK4	0.027949	0.041	0.38	0.017	0.69
5	10227711	FAM173B	0.0279761	0.043	0.56	0.019	0.4
7	6509235	KDELR2	0.0279799	NA	0.13	0.26	0.025
21	34614250	IFNAR2	0.0279947	0.077	0.61	0.015	0.26
14	24040436	JPH4	0.028	NA	NA	0.028	NA
22	21355576	THAP7	0.0280326	0.023	0.95	0.012	0.7
6	90642251	BACH2	0.0280389	0.017	0.9	0.024	0.5
12	10958658	TAS2R8	0.0280854	0.79	0.013	0.64	0.028
6	20486920	E2F3	0.0281119	0.85	0.3	0.00099	0.73
15	83330603	AP3B2	0.0281984	NA	0.0017	0.54	0.93
6	47202564	TNFRSF21	0.0282677	0.15	0.12	0.043	0.24
12	94761622	CCDC41	0.0283512	0.44	0.86	0.0017	0.29
12	53819697	AMHR2	0.0283835	0.34	NA	0.013	NA
14	37132525	PAX9	0.0283835	0.034	NA	0.13	NA
11	108380281	EXPH5	0.0284196	0.12	0.13	0.04	0.3
4	70723299	SULT1E1	0.0284541	NA	0.6	0.045	0.032
3	9862274	ARPC4-TTLL3	0.0285674	0.026	0.3	0.026	0.93
8	98863677	LAPTM4B	0.0286976	0.61	0.39	0.0019	0.42
16	15131974	NTAN1	0.0287546	0.74	0.67	0.12	0.0032
17	37840860	PGAP3	0.0287684	0.58	0.54	0.77	0.00079
8	95746907	DPY19L4	0.0288804	0.05	0.98	0.017	0.23
6	4716117	CDYL	0.0288863	0.0039	0.13	0.45	0.84
12	20864342	SLCO1C1	0.0289303	0.38	0.72	0.0027	0.26
11	134253984	B3GAT1	0.029	NA	NA	0.029	NA
10	11047400	CELF2	0.0290319	0.021	0.14	0.098	0.67
15	65489098	CILP	0.0291635	0.92	0.64	0.0006	0.55
2	217279850	SMARCAL1	0.0291735	0.05	0.54	0.18	0.04
14	105958536	C14orf80	0.029335	0.36	0.16	0.81	0.0042
4	122068316	TNIP3	0.0293558	0.2	NA	0.023	NA
20	62572145	UCKL1	0.0294955	0.019	0.15	0.11	0.63
22	19118992	TSSK2	0.0295103	0.39	NA	0.075	0.031
4	57164441	KIAA1211	0.0295932	0.5	0.54	0.0015	0.49
19	15533930	WIZ	0.0296246	0.31	NA	0.015	NA
2	113671372	IL37	0.0297427	NA	0.073	0.064	NA
4	102751076	BANK1	0.0297683	0.78	0.024	0.049	NA
1	38033291	GNL2	0.0297798	0.31	0.2	0.0038	0.85
5	140682757	SLC25A2	0.0297857	NA	NA	0.6	0.0078
6	125379202	RNF217	0.029826	0.77	0.0059	0.94	0.047
2	153405580	FMNL2	0.0298287	0.34	0.41	0.96	0.0015
9	115931593	FKBP15	0.0298715	0.83	0.022	0.0136	0.81
8	144651881	C8orf73	0.0298769	0.69	0.00135	0.6	0.36
1	197059382	ASPM	0.0299477	0.23	0.57	0.028	0.055
10	74100615	DNAJB12	0.0299525	0.0093	0.47	0.14	0.33
3	170136972	CLDN11	0.0299572	0.062	NA	0.076	NA
19	58790675	AC010642.1	0.03	0.03	NA	NA	NA
19	19291568	MEF2BNB-MEF2B	0.03	NA	NA	0.03	NA
2	190618698	OSGEPL1	0.03	NA	NA	0.03	NA
1	52703169	ZFYVE9	0.0300015	0.24	0.19	0.23	0.0193
3	47098389	SETD2	0.0300486	0.078	0.015	0.51	0.34
3	49053938	DALRD3	0.0300589	0.87	0.73	0.94	0.00034
11	116706664	APOA1	0.0300674	0.79	0.024	0.51	0.021
12	6687692	CHD4	0.0300763	0.12	0.9	0.033	0.057
1	21071406	HP1BP3	0.0300788	NA	0.31	0.004	0.75
20	44171455	EPPIN	0.03008	0.034	0.83	0.0072	1
10	43288009	BMS1	0.0300898	0.84	0.25	0.0088	0.11
7	48266876	ABCA13	0.030098	0.02	0.82	0.62	0.02
1	161141673	B4GALT3	0.0301358	0.37	0.42	0.0057	0.23
17	79983379	LRRC45	0.0301654	0.024	0.46	0.084	0.22
19	47995358	NAPA	0.0301981	NA	NA	0.71	0.0067
2	219204592	PNKD	0.0302032	0.79	0.0077	0.24	0.14
11	70319533	SHANK2	0.0302164	0.055	0.037	0.15	0.67
1	85020695	CTBS	0.0303408	0.014	0.15	0.101	0.97
11	64518016	PYGM	0.0304108	0.61	0.24	0.47	0.003
22	26884039	SRRD	0.0304279	0.024	NA	0.2	NA
13	25743748	FAM123A	0.0304905	0.71	0.048	0.19	0.032
10	69692476	HERC4	0.0305539	0.3	0.73	0.73	0.0013
9	132566551	TOR1B	0.0305785	0.57	0.39	0.0018	0.52
9	37780831	EXOSC3	0.0309501	0.41	NA	0.0031	0.76
9	101498853	ANKS6	0.0309524	0.19	0.86	0.0048	0.27
10	101379915	SLC25A28	0.031	NA	NA	0.031	NA
22	30136701	ZMAT5	0.031	NA	NA	0.031	NA
11	65307727	LTBP3	0.0310956	0.97	0.66	0.37	0.0009
1	19235138	IFFO2	0.031096	0.58	0.89	0.00059	0.7
17	45774072	TBKBP1	0.0311215	0.36	NA	0.51	0.0053
12	108589662	WSCD2	0.0311438	0.041	0.94	0.0084	0.66
4	73943154	ANKRD17	0.0311975	0.136	0.7	0.3	0.0075
16	61687583	CDH8	0.0312834	0.27	0.59	0.5	0.0027
5	40841741	CARD6	0.0313341	0.0036	0.47	0.49	0.26
22	31324124	MORC2	0.031428	0.058	NA	0.086	NA
7	81334825	HGF	0.0316	0.11	0.109	0.02	0.91
11	33308084	HIPK3	0.0316673	0.3	0.0037	0.68	0.29
21	46875564	COL18A1	0.0317996	0.022	0.35	0.13	0.22
19	17972120	RPL18A	0.031862	NA	0.13	0.039	NA
16	24788549	TNRC6A	0.0318859	0.2	0.48	0.49	0.0047
1	214531313	PTPN14	0.0319527	0.033	0.5	0.014	0.96
9	21206532	IFNA10	0.032	0.032	NA	NA	NA
19	19291568	MEF2BNB	0.032	NA	NA	0.032	NA
11	61015916	PGA5	0.032	0.032	NA	NA	NA
19	43376055	PSG1	0.032	NA	NA	0.032	NA
6	134491554	SGK1	0.0321851	NA	0.2	0.96	0.0053
2	42578409	COX7A2L	0.0323368	NA	NA	0.6	0.0086
5	176734179	MXD3	0.0323573	0.062	NA	0.057	0.29
11	55872990	OR8H2	0.0323894	NA	NA	0.0055	0.94
17	9873043	GAS7	0.0324695	NA	0.24	0.039	0.11
21	44151970	PDE9A	0.0325033	0.58	0.15	0.0039	0.67
17	40841014	CNTNAP1	0.0326368	0.054	0.55	0.035	0.22
17	18874794	FAM83G	0.032642	0.31	0.26	0.0033	0.86
17	76799795	USP36	0.0327064	0.14	0.76	0.49	0.0044
3	185146473	MAP3K13	0.0327388	0.35	0.0117	0.17	0.33
1	110033668	ATXN7L2	0.0328095	0.03	0.87	0.04	NA
7	65547874	ASL	0.0328159	0.013	0.26	0.22	0.31
7	92963242	CCDC132	0.0329818	0.79	0.9	0.46	0.00071
8	99961655	OSR2	0.033	0.033	NA	NA	NA
15	65208099	ANKDD1A	0.0330135	0.0053	0.65	0.25	0.27
3	179371154	USP13	0.0330366	0.025	0.95	0.0121	0.81
2	241631588	AQP12A	0.0330932	0.51	NA	0.0104	NA
5	83356255	EDIL3	0.0333486	0.0018	0.92	0.19	0.75
4	184585165	TRAPPC11	0.0333486	0.057	0.12	0.23	0.15
19	47223981	STRN4	0.0333731	0.00064	0.86	0.74	0.58
21	27852724	CYYR1	0.0333978	0.00035	0.91	0.99	0.75
2	189898846	COL5A2	0.0334511	0.64	0.91	0.0037	0.11
11	5221008	OR51V1	0.0335076	0.052	0.112	0.48	0.085
1	48231630	TRABD2B	0.0336058	0.73	NA	0.0074	NA
8	133141798	KCNQ3	0.0336271	0.47	0.22	0.0165	0.14
4	119947985	SYNPO2	0.0336368	0.0054	0.44	0.113	0.89
2	150071156	LYPD6B	0.0337676	0.0031	0.89	0.13	0.67
17	15938257	NCOR1	0.0338451	0.23	0.91	0.64	0.0018
17	8285501	RPL26	0.0339083	0.26	NA	NA	0.021
16	58035429	USB1	0.0339083	0.084	NA	0.065	NA
9	125424052	OR1L1	0.0339728	0.19	0.5	0.0044	0.58
3	9490275	SETD5	0.0339823	0.97	0.056	0.0047	0.95
22	30125188	CABP7	0.034	NA	NA	0.034	NA
1	117113552	CD58	0.034	NA	NA	0.034	NA
10	99190891	PGAM1	0.034	NA	NA	0.034	NA
4	165891141	TRIM61	0.034	0.034	NA	NA	NA
17	17250197	NT5M	0.0342177	0.87	0.0022	0.4	0.32
19	55525497	GP6	0.0344098	0.19	0.5	0.2	0.013
2	206994851	NDUFS1	0.0344394	0.63	0.52	0.0034	NA
16	89167094	ACSF3	0.0344889	0.0042	0.89	0.39	0.17
10	95076470	MYOF	0.0346187	0.89	0.61	0.00102	0.45
12	57317649	SDR9C7	0.0346279	NA	0.3	0.68	0.0055
12	15102799	ARHGDIB	0.0347787	0.018	0.89	0.029	0.54
11	85347173	TMEM126B	0.0348218	0.17	0.22	0.32	0.021
15	32935813	SCG5	0.0348432	NA	0.12	0.047	NA
2	178528608	PDE11A	0.0348856	0.0014	0.45	1	0.4
16	67691668	ACD	0.0349333	0.034	0.063	0.53	NA
3	9776324	BRPF1	0.035	NA	NA	0.035	NA
7	116140419	CAV2	0.035	NA	NA	0.035	NA
17	3346474	SPATA22	0.035	NA	NA	0.035	NA
7	138711291	ZC3HAV1L	0.035	NA	NA	0.035	NA
1	20979136	DDOST	0.0350152	0.51	0.12	0.0045	0.92
1	39353636	RHBDL2	0.0350743	0.0034	0.58	0.23	0.56
2	165765194	SLC38A11	0.0350857	0.18	0.99	0.046	0.031
14	33014549	AKAP6	0.0352034	1	0.95	0.112	0.0024
18	34156497	FHOD3	0.035381	0.3	0.52	0.0017	0.97
5	112889370	YTHDC2	0.0354983	0.89	0.4	0.0137	0.053
16	10837728	NUBP1	0.0354994	NA	NA	0.073	0.079
16	88947723	CBFA2T3	0.0355631	0.33	0.33	0.7	0.0034
5	65317206	ERBB2IP	0.0355918	0.85	0.16	0.53	0.0036
18	29848028	FAM59A	0.0357135	0.28	0.19	0.86	0.0057
15	78755281	IREB2	0.0358084	0.5	0.17	0.014	0.22
2	198436771	RFTN2	0.0358117	0.029	0.72	0.019	0.66
4	120166520	USP53	0.0358746	0.062	0.073	0.2	0.29
1	247751731	OR2G2	0.036	NA	NA	0.036	NA
3	101293089	PCNP	0.036	NA	NA	0.036	NA
6	29523676	UBD	0.036	NA	NA	0.036	NA
19	56934311	ZNF583	0.036	NA	NA	0.036	NA
10	124768583	ACADSB	0.0360697	0.14	0.27	0.02	0.35
1	158516967	OR6Y1	0.0361062	0.16	0.91	0.07	0.026
17	43922409	SPPL2C	0.0361575	0.42	0.076	0.59	0.0141
10	90673024	STAMBPL1	0.0362706	0.19	0.013	0.27	0.4
17	1673182	SERPINF1	0.0363795	0.62	0.15	0.0043	0.67
17	40134390	DNAJC7	0.0363887	NA	0.022	0.27	NA
20	389393	RBCK1	0.0363887	NA	0.18	0.033	NA
3	149192678	TM4SF4	0.0363887	NA	NA	0.33	0.018
1	162351752	RP11-565P22.6	0.0364542	NA	0.067	0.78	0.023
12	111291279	CCDC63	0.0364653	0.81	0.071	0.55	0.0085
7	97821855	LMTK2	0.0364702	0.07	0.49	0.14	0.056
11	67376033	NDUFV1	0.0365165	0.18	NA	0.97	0.0069
20	51870151	TSHZ2	0.0366507	0.11	0.76	0.18	0.018
12	53451849	TENC1	0.0366984	0.37	0.62	0.0013	0.91
19	53453880	ZNF816	0.0368941	0.21	0.016	0.22	0.37
9	214593	C9orf66	0.0369122	0.92	0.025	0.014	0.85
1	241823930	WDR64	0.0369122	0.28	0.025	0.46	0.085
6	26087686	HFE	0.0369156	0.92	0.38	0.027	0.029
3	148545686	CPB1	0.0369401	0.71	0.67	0.0006	0.96
9	75355093	TMC1	0.0369508	0.0008	0.89	0.7	0.55
12	123467177	ARL6IP4	0.0369975	NA	NA	0.0073	0.83
2	131350616	CFC1	0.037	0.037	NA	NA	NA
11	44931280	TSPAN18	0.037	NA	NA	0.037	NA
5	147204264	SPINK1	0.0370301	0.56	0.24	0.62	0.0033
17	57287425	SMG8	0.0370486	0.013	0.21	0.112	0.9
6	150386752	ULBP3	0.0370517	NA	0.75	0.0091	0.18
2	233735073	C2orf82	0.0372067	NA	0.0061	1	NA
3	36756863	DCLK3	0.0372277	0.14	0.53	0.45	0.0083
12	53900640	NPFF	0.0373338	0.23	0.0076	0.71	NA
19	10794630	ILF3	0.0373784	0.16	0.48	0.011	0.33
7	143792647	OR2A12	0.0374485	0.48	0.7	0.32	0.0026
5	173317206	CPEB4	0.037611	0.95	0.34	0.0013	0.67
3	49735503	RNF123	0.0379028	0.16	0.95	0.24	0.0078
19	45452024	APOC2	0.0379698	0.25	NA	0.025	NA
2	15735621	DDX1	0.038	NA	NA	0.038	NA
10	103368654	DPCD	0.038	0.038	NA	NA	NA
1	248524992	OR2T4	0.038	0.038	NA	NA	NA
14	22434148	TRAV12-3	0.038	0.038	NA	NA	NA
10	101544490	ABCC2	0.0380138	0.14	0.36	0.27	0.021
19	7082007	ZNF557	0.0381278	0.85	0.0028	0.18	0.67
19	4844790	PLIN3	0.0381289	0.69	0.16	0.005	0.52
5	111066697	NREP	0.0382416	0.11	0.13	0.36	0.056
3	69167851	LMOD3	0.0384882	0.86	0.48	0.47	0.0015
17	76157044	C17orf99	0.0385006	0.16	0.46	0.0046	0.86
12	66546100	RP11-745O10.4	0.0385816	0.74	0.78	0.23	0.0022
20	25058398	VSX1	0.0385866	0.92	0.42	0.36	0.0021
11	540740	LRRC56	0.0386125	0.012	0.44	0.078	0.71
5	40934471	C7	0.0387554	0.5	0.25	0.0056	0.42
5	64824784	CENPK	0.0387613	0.17	0.9	0.0031	0.62
6	74072466	KHDC3L	0.0387798	0.22	0.022	0.08	0.76
21	32492757	TIAM1	0.0387901	0.33	0.84	0.0059	0.18
5	140358559	PCDHA11	0.0388307	0.84	0.9	0.0013	0.3
10	99527407	SFRP5	0.0388732	0.018	0.52	0.14	NA
7	142988726	CASP2	0.0389876	0.22	NA	0.013	0.46
1	150248200	C1orf54	0.039	NA	NA	0.039	NA
12	57884053	MARS	0.0390077	0.0018	0.97	0.5	0.34
15	34159986	AVEN	0.0390167	0.044	NA	0.73	0.041
12	3392277	TSPAN9	0.0390321	0.17	NA	0.038	NA
10	13151189	OPTN	0.0390394	0.0152	0.19	0.98	0.105
19	4251069	CCDC94	0.0390523	0.0101	NA	0.64	NA
12	120750369	SIRT4	0.0390739	0.63	0.32	0.0018	0.82
6	150157345	LRP11	0.0391036	0.037	0.64	0.074	0.17
11	57068505	TNKS1BP1	0.0391279	0.72	0.56	0.0087	0.085
4	71697257	GRSF1	0.0391387	0.87	0.79	0.0031	0.14
9	138903523	NACC2	0.0391558	0.04	0.07	0.41	0.26
15	70347482	TLE3	0.0392151	0.49	0.37	0.0025	0.66
17	56638900	TEX14	0.0392587	0.48	0.51	0.024	0.051
2	160806159	PLA2R1	0.0392814	0.65	0.91	0.0013	0.39
14	42355844	LRFN5	0.0393198	0.89	0.0012	0.76	0.37
1	9099957	SLC2A5	0.0393509	0.15	0.64	0.0036	0.87
5	68715310	MARVELD2	0.0393707	0.022	0.03	0.47	0.97
1	11982580	KIAA2013	0.0394954	0.91	NA	0.0072	NA
7	25175698	C7orf31	0.0395031	0.0044	0.12	0.83	0.69
1	159273943	FCER1A	0.0395044	0.45	0.25	0.96	0.0028
1	114340502	RSBN1	0.0395084	0.39	0.5	0.0033	0.47
6	166572045	T	0.039558	0.43	0.3	NA	0.0104
9	132662722	FNBP1	0.0397671	0.14	0.38	0.14	0.041
12	64664420	C12orf56	0.0397673	0.0145	0.36	0.13	0.45
17	38296866	CASC3	0.039883	0.8	0.41	0.55	0.0017
9	36169598	CCIN	0.0399994	0.14	0.02	0.11	1
3	41288466	ULK4	0.0399994	0.16	0.11	0.035	0.5
17	31260307	TMEM98	0.04	NA	NA	0.04	NA
1	26365751	SLC30A2	0.0400684	0.013	0.15	0.7	NA
3	138218994	CEP70	0.0401192	0.35	0.61	0.21	0.0069
3	167747707	GOLIM4	0.0402205	0.045	0.99	0.41	0.017
9	107547734	ABCA1	0.0402729	0.0033	0.74	0.26	0.49
3	154801978	MME	0.0402845	0.53	0.045	0.015	0.87
22	38321806	MICALL1	0.0403017	0.28	0.39	0.046	0.062
14	78146252	ALKBH1	0.0403908	0.0088	0.28	0.56	NA
20	7864284	HAO1	0.0404287	0.21	0.79	0.023	0.082
22	42910722	RRP7A	0.0404879	0.015	NA	0.45	NA
5	150175109	C5orf62	0.0405103	0.25	0.71	0.0034	0.52
17	8285501	RP11-849F2.7	0.0405379	0.26	NA	NA	0.026
7	114563533	MDFIC	0.04054	0.56	0.034	0.022	0.75
1	86939130	CLCA1	0.0405649	0.103	0.82	0.051	0.073
2	127447837	GYPC	0.0407377	0.34	NA	0.02	NA
12	133586836	ZNF26	0.0409372	0.012	NA	0.57	NA
10	63445837	C10orf107	0.041033	0.83	0.19	0.0052	0.39
7	141672604	TAS2R38	0.0410568	NA	0.66	0.0104	NA
11	64884131	ZNHIT2	0.0410634	0.101	0.76	0.0043	0.97
19	11200268	LDLR	0.0410705	0.56	0.83	0.0013	0.53
11	89867964	NAALAD2	0.0410958	0.0034	0.14	0.91	0.74
16	67575421	FAM65A	0.0411873	0.31	0.84	0.0019	0.65
6	31709045	MSH5	0.0414865	0.00094	0.95	0.4	0.91
7	87704999	ADAM22	0.0414998	0.0105	0.89	0.06	0.58
7	156742796	NOM1	0.0415672	0.84	0.18	0.0028	0.77
16	29675114	SPN	0.041584	NA	NA	0.017	0.41
6	131486272	AKAP7	0.0418264	0.36	0.44	0.0031	0.67
6	132909837	TAAR5	0.0419537	0.51	0.12	0.015	0.36
1	15956880	DDI2	0.042	NA	NA	0.042	NA
16	1584377	TMEM204	0.042	NA	NA	0.042	NA
21	47717537	YBEY	0.0420139	NA	0.045	0.98	0.033
5	180166296	OR2Y1	0.0420155	0.46	0.5	0.32	0.0045
1	1447692	ATAD3A	0.0420289	0.64	0.91	0.0025	NA
19	46177412	GIPR	0.0421964	0.93	0.004	0.64	0.14
2	102472459	MAP4K4	0.0424873	0.61	0.23	0.0025	0.96
18	13008497	CEP192	0.0425584	0.0057	0.45	0.47	0.28
6	32975257	HLA-DOA	0.0425729	0.25	0.45	0.0038	0.79
7	102957397	DNAJC2	0.0427225	NA	0.12	0.06	NA
11	66617502	PC	0.0427426	0.13	0.63	0.61	0.0068
3	155649576	GMPS	0.0428211	NA	0.19	0.038	NA
5	112769530	TSSK1B	0.0428586	0.016	0.38	0.17	0.33
1	29320013	EPB41	0.042884	0.15	0.041	0.091	0.61
6	7182155	RREB1	0.0429783	0.36	0.99	0.31	0.0031
2	71206370	ANKRD53	0.043	NA	NA	0.043	NA
6	38224249	BTBD9	0.043	NA	NA	0.043	NA
19	18876208	CRTC1	0.043	0.043	NA	NA	NA
19	18391285	JUND	0.043	NA	NA	0.043	NA
5	147692077	SPINK7	0.0430131	NA	0.23	0.71	0.0092
2	37395103	SULT6B1	0.0430172	NA	0.45	0.63	0.0053
17	4047062	CYB5D2	0.0431562	0.94	0.094	0.5	0.0078
19	6822458	VAV1	0.0433725	0.094	NA	0.078	NA
12	72667286	TRHDE	0.0434351	0.00104	0.81	0.59	0.7
17	55027965	COIL	0.0434792	0.029	0.054	0.25	0.89
9	91652977	SHC3	0.0435784	0.38	0.82	0.033	0.034
11	8132301	RIC3	0.0437563	0.69	0.59	0.0016	0.54
11	68673601	IGHMBP2	0.0437862	0.37	0.013	0.12	0.61
16	31099011	RP11-196G11.1	0.0439228	0.0042	NA	0.4	0.92
19	19757073	ATP13A1	0.0439612	0.43	0.044	0.26	0.072
11	61015916	PGA4	0.044	0.044	NA	NA	NA
1	38453330	SF3A3	0.044	NA	NA	0.044	NA
22	22599607	VPREB1	0.044	NA	NA	0.044	NA
8	72127864	EYA1	0.0440142	0.44	0.45	0.0028	0.64
11	17408485	KCNJ11	0.0440149	0.2	0.025	0.31	NA
12	133306589	ANKLE2	0.0440808	0.19	0.83	0.41	0.0055
17	3828086	ATP2A3	0.044167	0.46	0.52	0.0021	0.71
1	11906068	NPPA	0.0441964	NA	0.3	0.025	NA
6	31709045	MSH5-SAPCD1	0.0444155	0.00104	0.95	0.4	0.91
8	91094898	CALB1	0.0445243	NA	0.032	0.41	0.12
15	56126450	NEDD4	0.0446599	0.034	0.2	0.062	0.86
19	49926464	PTH2	0.045	0.045	NA	NA	NA
19	45150614	PVR	0.0450236	0.61	0.47	0.16	0.008
10	106124511	CCDC147	0.0451336	0.64	0.00124	0.91	0.51
19	18285944	IFI30	0.0451447	0.055	0.29	0.11	0.21
1	160970508	F11R	0.0452343	0.047	0.27	0.032	0.91
1	213244366	RPS6KC1	0.0452633	0.43	0.23	0.11	0.034
10	134013974	DPYSL4	0.0452689	NA	0.63	0.0036	0.71
12	28412372	CCDC91	0.0452776	NA	0.0042	0.59	0.65
1	229654053	ABCB10	0.0453669	NA	NA	0.043	0.18
16	75663379	KARS	0.0453958	0.36	0.54	0.0021	0.91
2	11332408	ROCK2	0.0454047	0.046	0.024	0.34	0.99
1	38079393	RSPO1	0.0454848	NA	0.0067	0.59	0.41
3	141682750	TFDP2	0.0454865	NA	0.023	0.87	0.081
1	166829517	TADA1	0.0455379	0.01	0.87	0.11	0.39
17	48503676	ACSF2	0.0457123	0.3	0.16	0.17	0.046
14	34985658	EAPP	0.0457716	0.82	0.84	0.039	0.014
2	120197784	SCTR	0.0458508	0.19	0.75	0.0027	0.98
5	79854826	ANKRD34B	0.0458881	0.073	0.78	0.017	0.39
13	43148653	TNFSF11	0.0458888	0.11	0.05	0.078	0.88
11	74413843	CHRDL2	0.046059	0.84	0.95	0.00071	0.67
20	35835826	RPN2	0.0460873	NA	0.55	0.12	0.025
5	16177949	2020-03-11	0.0462882	0.61	NA	0.013	NA
18	618067	CLUL1	0.0462882	NA	0.13	0.061	NA
16	69381705	RP11-343C2.7	0.0463849	0.53	NA	0.015	NA
1	200959302	KIF21B	0.0464597	0.15	0.58	0.26	0.017
15	23889739	MAGEL2	0.0469267	0.35	0.82	0.0068	0.2
3	47277065	KIF9	0.0469493	0.015	0.35	0.31	0.24
5	80381725	RASGRF2	0.0469984	0.0019	0.71	0.29	1
17	19812541	AKAP10	0.047	NA	NA	0.047	NA
10	14816378	FAM107B	0.047	0.047	NA	NA	NA
17	3346474	RP11-147K16.2	0.047	NA	NA	0.047	NA
1	39325136	RRAGC	0.047	0.047	NA	NA	NA
5	151771817	NMUR2	0.0470304	0.14	0.18	0.037	0.42
1	150550761	MCL1	0.0471087	0.034	0.2	0.25	NA
19	44341340	ZNF283	0.0471445	0.39	0.039	0.68	0.038
5	132084106	CCNI2	0.0473514	0.54	0.37	0.45	0.0044
19	12863429	BEST2	0.0474498	NA	0.004	0.74	0.58
15	91499986	RCCD1	0.0475875	0.8	0.97	0.0048	0.107
10	134622046	TTC40	0.0477465	0.23	0.15	0.043	0.27
5	76331419	AGGF1	0.0478476	0.29	0.0022	0.67	0.94
19	2290767	LINGO3	0.0478965	0.44	0.104	0.038	NA
6	151669875	AKAP12	0.047899	0.89	0.34	0.35	0.0038
15	55652089	CCPG1	0.0479577	0.91	0.56	0.92	0.00086
1	50610767	ELAVL4	0.0479736	0.69	NA	0.012	NA
7	56049918	GBAS	0.0479796	NA	0.83	0.015	0.14
3	45942554	CCR9	0.0479902	0.66	0.28	0.0039	0.56
12	92537956	BTG1	0.048	NA	NA	0.048	NA
4	76489345	C4orf26	0.048	NA	NA	0.048	NA
11	533553	HRAS	0.048	0.048	NA	NA	NA
18	31538235	NOL4	0.048	0.048	NA	NA	NA
11	61249383	PPP1R32	0.0480497	0.24	0.13	0.48	0.027
4	56762938	EXOC1	0.0482335	NA	0.38	0.77	0.006
1	15860803	DNAJC16	0.0482897	0.078	NA	0.107	NA
1	27219192	GPATCH3	0.0484061	0.0036	0.91	0.48	0.26
15	75116809	LMAN1L	0.0485291	0.016	0.054	0.5	0.95
7	39610177	YAE1D1	0.0486429	0.052	0.022	0.36	1
1	156213921	PAQR6	0.0486681	0.02	0.046	0.56	0.8
2	10008792	TAF1B	0.0487123	0.88	1	0.00067	0.7
14	23816670	SLC22A17	0.0487957	NA	0.098	0.35	0.052
3	119526176	NR1I2	0.048799	0.11	0.57	0.33	0.02
17	10351368	MYH4	0.0488683	0.29	0.22	0.25	0.026
17	79077377	BAIAP2	0.049	NA	NA	0.049	NA
3	51895692	IQCF2	0.049	NA	NA	0.049	NA
3	47374680	KLHL18	0.049	NA	NA	0.049	NA
1	197887095	LHX9	0.049	NA	NA	0.049	NA
16	3022997	PKMYT1	0.049	NA	NA	0.049	NA
14	24679877	CHMP4A	0.049183	0.78	0.61	0.02	0.044
11	129722427	TMEM45B	0.0492365	0.0049	0.55	0.67	NA
19	38572894	SIPA1L3	0.0494672	0.79	0.27	0.9	0.0022
9	130476383	PTRH1	0.0495543	NA	0.023	0.72	0.11
2	220075431	ABCB6	0.0495622	0.95	0.51	0.00093	0.94
1	27190149	SFN	0.0496489	0.063	NA	0.137	NA
6	154481048	IPCEF1	0.0496514	0.79	0.47	0.0133	0.086
3	157271129	C3orf55	0.0496629	0.086	0.19	1	0.026
16	569014	RAB11FIP3	0.0496712	NA	0.12	0.0157	0.97
12	8374646	FAM90A1	0.05	0.05	NA	NA	NA
4	44712970	GNPDA2	0.05	NA	NA	0.05	NA
4	40245208	RHOH	0.05	NA	NA	0.05	NA
16	334531	PDIA2	0.050038	0.21	0.33	0.2	0.031
1	43055036	CCDC30	0.0500905	0.4	0.82	0.0041	0.32
18	19995745	CTAGE1	0.0502367	0.64	0.01	NA	0.29
9	107456763	OR13D1	0.0503326	0.32	0.32	0.0051	0.83
5	93489746	KIAA0825	0.0503676	0.95	0.025	0.21	0.087
15	65621441	IGDCC3	0.0504462	0.17	0.13	0.024	0.82
14	24806303	RP11-934B9.3	0.0504522	0.169	0.13	0.9	0.022
21	37444517	CBR1	0.0504827	0.037	0.31	0.052	0.73
4	38798294	TLR1	0.0505579	0.46	0.16	0.77	0.0077
11	113194067	TTC12	0.0506204	0.66	0.023	0.24	0.12
8	36663899	KCNU1	0.0507033	0.67	0.115	0.0072	0.79
19	44153044	PLAUR	0.050717	0.73	0.55	0.0091	0.12
10	22605398	COMMD3	0.0507668	0.99	0.16	0.042	0.066
19	41025981	SPTBN4	0.0511188	0.79	0.016	0.27	0.13
2	106729219	UXS1	0.0511665	0.13	0.24	0.061	NA
10	44871397	CXCL12	0.0513504	0.12	0.022	0.18	0.94
12	30872061	CAPRIN2	0.0514871	0.17	0.115	0.037	0.62
13	100909892	PCCA	0.0516359	0.31	0.17	0.0111	0.77
3	25635127	RARB	0.0518653	NA	0.26	0.035	NA
11	1774810	CTSD	0.052	NA	NA	NA	0.052
19	35648365	FXYD5	0.052	NA	NA	0.052	NA
22	37462155	TMPRSS6	0.0522006	0.7	0.073	0.14	0.064
22	41075523	MCHR1	0.0523362	0.14	0.08	0.076	0.54
17	8006708	ALOXE3	0.052517	0.34	0.87	0.022	0.071
6	8016007	BLOC1S5	0.0525221	0.022	NA	0.42	NA
19	45910365	CD3EAP	0.0525244	0.29	0.17	0.0109	0.86
2	37088298	STRN	0.0525474	0.15	0.47	0.028	NA
2	207310170	ADAM23	0.0525688	0.057	0.55	0.82	0.018
6	160176479	WTAP	0.0525877	0.19	0.66	0.0052	0.71
10	90429592	LIPF	0.0527492	0.003	0.76	0.6	0.34
19	10203363	ANGPTL6	0.0528239	0.63	0.0059	0.19	0.66
10	105727558	SLK	0.0528551	0.68	0.0077	0.099	0.9
3	107096581	CCDC54	0.0528633	0.31	0.0032	0.84	0.56
7	110526714	IMMP2L	0.053	NA	NA	0.053	NA
9	118949480	PAPPA	0.0530842	0.0033	0.66	0.28	0.77
3	27418257	SLC4A7	0.0530963	0.0105	0.49	0.11	0.83
6	31747510	VARS	0.0531198	0.53	0.37	0.47	0.0051
6	105563677	BVES	0.0531239	0.41	0.078	0.35	0.042
11	113670072	USP28	0.0531983	0.071	0.29	0.026	0.88
1	18661482	IGSF21	0.0532348	0.76	0.84	0.00083	0.89
19	54973482	LENG9	0.0532418	0.32	0.88	0.0025	0.67
18	9886890	TXNDC2	0.0532702	0.02	NA	0.47	NA
2	219319666	USP37	0.0533556	0.013	0.13	0.5	0.56
7	30915262	RP5-877J2.1	0.0535856	0.12	0.98	0.0054	0.75
1	233490701	RP5-862P8.2	0.0537064	0.45	0.012	0.15	0.59
2	232081369	ARMC9	0.0537734	0.6	0.57	1	0.0014
7	92821670	HEPACAM2	0.0537811	0.38	0.67	0.19	0.0099
17	292997	FAM101B	0.0538537	0.91	0.66	0.47	0.0017
2	120362294	AC069154.2	0.0538568	0.95	0.29	0.0026	0.67
5	36217959	NADKD1	0.0538973	NA	0.73	0.7	0.004
19	12848342	ASNA1	0.054	NA	NA	0.054	NA
5	148989259	ARHGEF37	0.054046	0.59	0.59	0.0022	0.63
10	12940631	CCDC3	0.0540869	0.23	0.19	0.047	NA
11	32413538	WT1	0.0542015	0.8	NA	0.012	NA
11	65408937	SIPA1	0.0543375	0.5	0.76	0.4	0.0032
7	73631177	LAT2	0.0545087	0.64	0.11	0.0178	0.39
14	21862552	CHD8	0.0545341	0.44	0.3	0.57	0.0065
9	27172662	TEK	0.0545621	0.2	0.23	0.38	0.028
1	70819679	ANKRD13C	0.0547995	0.34	0.15	0.042	0.23
3	147109032	ZIC4	0.0548072	0.19	0.15	0.19	0.091
19	44833851	CTC-512J12.6	0.0548942	0.92	0.065	0.014	0.59
10	89516651	ATAD1	0.0549664	NA	0.21	0.05	0.2
15	65345387	SLC51B	0.055	NA	NA	0.055	NA
16	31765105	ZNF720	0.055	NA	NA	0.055	NA
1	3389727	ARHGEF16	0.0550063	0.75	0.57	0.0061	0.19
19	12691613	ZNF490	0.0550906	NA	0.47	0.0054	0.83
7	107399213	CBLL1	0.0554445	NA	0.69	0.22	0.014
7	88963039	ZNF804B	0.0555257	0.36	0.37	0.0049	0.77
1	40874410	SMAP2	0.0555455	0.0122	0.46	0.14	0.64
17	33448818	FNDC8	0.0555557	0.47	0.98	0.28	0.0039
7	73510996	LIMK1	0.0555907	NA	NA	0.045	0.22
7	142640113	KEL	0.0556088	0.61	0.53	0.19	0.0082
10	103825747	HPS6	0.0556305	0.4	0.14	0.12	0.075
19	16686864	MED26	0.0556434	0.57	0.78	0.63	0.0018
11	74985208	ARRB1	0.055667	0.53	0.42	0.0096	NA
22	51183253	ACR	0.056	0.056	NA	NA	NA
9	136531857	SARDH	0.0561201	0.59	0.38	0.34	0.0067
10	5541183	CALML5	0.0561544	0.15	0.2	0.71	0.024
14	21052259	RNASE11	0.0561967	0.14	0.74	0.13	0.038
5	39308330	C9	0.0564279	0.38	0.14	0.044	0.22
22	25124143	PIWIL3	0.0565817	0.35	0.076	0.036	0.54
1	117554216	CD101	0.0565817	0.18	0.28	0.0114	0.9
11	8641037	TRIM66	0.0565817	0.27	0.021	0.24	0.38
7	148504761	EZH2	0.0566092	0.18	0.15	0.081	NA
1	155911517	RXFP4	0.0567307	0.26	0.39	0.32	0.016
15	28096573	OCA2	0.0567562	0.086	0.85	0.0103	0.69
12	31944944	H3F3C	0.057	NA	NA	0.057	NA
19	51563876	KLK13	0.057	0.057	NA	NA	NA
4	159836336	C4orf45	0.0571563	0.21	0.019	0.47	0.28
14	89307227	TTC8	0.0572507	0.94	0.28	0.002	1
10	13214753	MCM10	0.0572579	0.6	0.015	0.13	0.45
19	2269692	OAZ1	0.0573118	0.93	NA	0.92	0.0026
21	34625019	AP000295.9	0.0573746	0.101	1	0.83	0.0063
12	80199944	PPP1R12A	0.0575371	0.16	0.75	0.013	0.34
19	48624555	LIG1	0.0576034	0.92	0.0023	0.27	0.93
1	157648533	FCRL3	0.0576479	0.34	0.18	0.0106	0.82
19	39689877	NCCRP1	0.0576575	NA	0.0115	0.9	NA
4	24810093	CCDC149	0.0576675	0.96	0.99	0.35	0.0016
6	30039034	RNF39	0.0577099	0.39	0.045	0.66	0.046
13	38138689	POSTN	0.0579165	0.29	0.058	0.49	0.065
1	91403431	ZNF644	0.0579659	0.0097	0.2	0.79	0.35
12	109041188	CORO1C	0.058	NA	NA	0.058	NA
1	93426938	FAM69A	0.058	0.058	NA	NA	NA
7	141137475	TMEM178B	0.058	NA	NA	0.058	NA
5	158702232	UBLCP1	0.058	NA	NA	0.058	NA
19	46376089	FOXA3	0.0581063	0.72	NA	0.0047	0.67
3	43344716	SNRK	0.0581118	0.63	0.074	0.021	0.55
1	153507176	S100A6	0.0581641	NA	0.6	0.44	0.0086
3	174814738	NAALADL2	0.0581699	0.107	0.56	0.018	0.5
7	99688952	COPS6	0.0582211	0.9	0.003	0.8	0.25
11	67223086	CABP4	0.0583423	0.82	0.34	0.0029	0.67
13	28794511	PAN3	0.0583437	0.44	0.027	0.19	0.24
1	32682815	TMEM234	0.058376	0.0041	0.58	0.95	0.24
2	58387258	FANCL	0.0583993	0.17	0.79	0.017	NA
3	196792163	DLG1	0.0584083	0.003	0.95	0.56	0.34
4	146560355	MMAA	0.0584307	0.024	NA	0.8	0.119
11	123810603	OR4D5	0.0584746	0.071	0.44	0.87	0.02
7	23227652	NUPL2	0.0585702	0.081	0.75	0.69	0.013
3	155546124	SLC33A1	0.0586127	0.37	0.76	0.002	0.97
16	68100461	DUS2L	0.0586203	0.71	0.29	0.005	0.53
3	137881014	DBR1	0.0586969	0.16	0.51	0.0067	1
9	132838016	GPR107	0.0587067	0.041	0.057	0.39	0.6
1	111854889	CHIA	0.0587308	0.32	0.76	0.45	0.005
12	125284671	SCARB1	0.0588663	0.044	0.78	0.016	1
17	7454275	TNFSF12-TNFSF13	0.058979	0.019	NA	0.56	NA
11	67048203	ADRBK1	0.059	NA	NA	0.059	NA
3	119246670	CD80	0.059	NA	NA	0.059	NA
8	87588042	CNGB3	0.0590202	0.008	0.39	0.57	0.31
14	90429595	TDP1	0.0590788	0.51	0.077	0.19	0.074
11	57440635	ZDHHC5	0.0593117	0.07	0.075	0.23	0.46
17	57109286	TRIM37	0.0594501	0.28	0.079	0.14	0.18
21	38865433	DYRK1A	0.0594621	0.77	0.016	0.19	NA
7	116165144	CAV1	0.0597047	0.24	NA	0.045	NA
15	93173517	FAM174B	0.0597499	NA	0.047	0.23	NA
20	61451333	COL9A3	0.059832	0.59	0.46	0.061	0.034
1	180199727	LHX4	0.0598378	0.059	0.019	0.54	0.93
17	4849268	PFN1	0.0598405	NA	NA	0.019	0.57
11	126160826	TIRAP	0.0599881	0.51	0.81	0.0072	0.19
5	133534797	PPP2CA	0.06	NA	NA	0.06	NA
8	70980738	PRDM14	0.060062	0.95	0.21	0.66	0.0043
12	32134064	KIAA1551	0.060119	0.7	0.81	0.5	0.002
12	13364484	EMP1	0.06017	0.11	0.68	0.33	0.023
11	104897616	CASP1	0.0602616	0.64	0.021	0.058	0.73
20	48124462	PTGIS	0.060286	0.39	0.05	0.2	0.146
17	17766114	TOM1L2	0.0603293	0.03	0.72	0.029	0.91
15	64980951	OAZ2	0.0603777	0.01	0.16	0.41	0.87
22	50639473	RP3-402G11.5	0.0606177	0.53	0.74	0.0061	0.24
14	103406051	CDC42BPB	0.0606605	0.63	0.019	0.049	0.98
1	45166683	C1orf228	0.0607408	0.22	0.55	0.014	0.34
4	102117083	PPP3CA	0.0608338	0.065	NA	0.17	NA
1	19644218	PQLC2	0.0608338	NA	0.085	0.13	NA
12	8278195	CLEC4A	0.061	NA	NA	0.061	NA
3	47539870	ELP6	0.0610525	0.63	0.047	0.082	NA
3	46963755	CCDC12	0.0610956	NA	0.14	0.56	0.031
19	51379798	KLK2	0.0611061	0.25	0.75	0.62	0.005
19	54659529	LENG1	0.0611061	0.25	0.93	1	0.0025
4	675949	MFSD7	0.0611853	0.65	0.08	0.56	0.02
9	139089436	LHX3	0.061197	0.87	0.2	0.014	NA
3	97664666	MINA	0.0612483	0.41	0.026	0.072	0.76
1	44447413	B4GALT2	0.0612924	0.82	0.0078	0.11	0.83
11	836407	CD151	0.0613289	0.036	0.31	NA	NA
2	88825941	C2orf51	0.0614365	0.56	0.81	0.0038	0.34
6	119136133	MCM9	0.0614412	0.41	0.76	0.0019	0.99
9	4826961	RCL1	0.061491	0.23	0.45	0.027	0.21
21	33825695	FAM176C	0.0615086	0.2	NA	0.056	NA
6	41652493	TFEB	0.0615086	NA	0.016	0.7	NA
12	54394284	HOXC9	0.0615984	0.34	NA	0.033	NA
7	99704892	TAF6	0.061703	NA	0.2	0.056	0.22
1	21053559	SH2D5	0.0621334	0.028	0.26	0.13	0.63
17	33875688	SLFN14	0.0622022	0.79	0.21	0.008	0.45
17	62582265	SMURF2	0.0624052	0.38	NA	0.03	NA
4	69337325	TMPRSS11E	0.0624052	NA	NA	0.76	0.015
11	118107805	MPZL3	0.0624645	0.68	0.41	0.0028	0.77
17	40123938	CNP	0.0624942	0.44	0.3	0.019	NA
6	90354789	MDN1	0.0625207	0.3	0.33	0.019	0.32
6	43483808	YIPF3	0.0625841	0.44	NA	0.026	NA
4	84502765	AGPAT9	0.0626137	0.038	0.045	0.84	0.42
2	1647242	PXDN	0.0627918	0.28	0.91	0.0041	0.58
22	31924818	SFI1	0.0628031	0.35	0.0098	0.31	0.57
4	159140503	TMEM144	0.0628522	NA	0.05	0.23	NA
11	123756132	TMEM225	0.0629228	0.31	0.012	0.38	0.43
1	206243143	C1orf186	0.0629415	0.016	NA	0.72	NA
11	48327794	OR4S1	0.0629667	NA	0.11	0.036	0.64
5	180338368	BTNL8	0.0629742	0.77	0.13	0.16	0.038
1	2519989	FAM213B	0.063	NA	NA	0.063	NA
18	23612484	SS18	0.063	NA	NA	0.063	NA
17	48245770	SGCA	0.0630311	0.47	0.2	0.027	NA
5	56155618	MAP3K1	0.0631474	0.47	0.038	0.59	0.058
11	8060566	TUB	0.0632002	0.24	0.38	0.061	0.11
20	44692202	NCOA5	0.0632073	0.0154	0.24	0.24	0.69
8	72967795	TRPA1	0.0632359	0.048	0.58	0.022	1
2	163208877	GCA	0.0632769	0.46	0.0119	0.14	0.8
3	148757864	HLTF	0.0632945	0.29	0.5	0.0045	0.94
11	130275533	ADAMTS8	0.0633114	0.059	0.4	0.2	0.13
17	79478236	ACTG1	0.0633429	NA	0.27	0.043	NA
1	53320274	ZYG11A	0.0633923	0.053	0.25	0.8	0.058
11	5364030	OR51B5	0.0634669	0.19	0.0058	0.69	0.81
12	54686186	NFE2	0.0634765	NA	0.97	0.012	NA
3	165547569	BCHE	0.0635127	0.38	0.95	0.61	0.0028
3	124017713	KALRN	0.0635294	0.56	0.062	0.94	0.0189
13	21955582	ZDHHC20	0.0635334	0.12	0.36	0.17	0.084
6	151869451	CCDC170	0.0635915	0.2	0.36	0.26	0.033
19	49206286	FUT2	0.0635915	0.33	0.52	0.3	0.012
15	74276995	STOML1	0.0636724	0.26	0.066	0.15	NA
1	16770235	NECAP2	0.0637367	0.54	1	0.0014	0.82
5	123974914	ZNF608	0.0638213	0.2	0.34	0.0105	0.87
13	25255705	ATP12A	0.0638478	0.93	0.22	0.0098	0.31
17	3101141	OR1A2	0.0638494	0.14	0.48	0.37	0.025
11	68527074	CPT1A	0.0638754	0.49	0.036	0.043	0.82
9	116181419	C9orf43	0.0639975	0.72	0.38	0.02	0.114
2	209106854	IDH1	0.064	NA	NA	0.064	NA
8	24251659	ADAMDEC1	0.0640277	0.98	0.0035	0.26	0.7
7	117864949	ANKRD7	0.0642785	0.71	0.0052	0.27	0.63
7	158449369	NCAPG2	0.0643239	0.77	0.0027	0.36	0.84
6	27420048	ZNF184	0.0643585	0.64	0.76	0.00154	0.84
10	12123525	DHTKD1	0.0644517	0.28	0.92	0.051	0.048
2	233897503	NEU2	0.0644534	0.11	0.91	0.14	0.045
17	38176038	MED24	0.0644581	0.07	0.17	0.053	1
1	173155860	TNFSF4	0.0645428	NA	0.066	0.18	NA
11	59622246	TCN1	0.0645714	0.62	0.0024	0.5	0.85
1	24484171	IL28RA	0.0646166	NA	0.13	0.47	0.043
6	106536253	PRDM1	0.0646577	0.12	0.56	0.023	0.41
17	6899500	ALOX12	0.0646604	0.13	0.41	0.29	0.041
2	73476302	CCT7	0.0647242	NA	0.057	0.07	0.66
22	38482409	BAIAP2L2	0.0647741	0.0047	0.79	0.71	NA
22	44360335	SAMM50	0.0647976	0.85	0.44	0.68	0.0025
5	73932199	ENC1	0.0648972	NA	0.92	0.013	NA
9	38068162	RP11-613M10.9	0.0648972	0.052	NA	NA	0.23
2	27720201	GCKR	0.0649145	0.18	0.11	0.046	0.7
2	172379099	CYBRD1	0.0649173	0.21	0.17	0.94	0.019
1	223716508	CAPN8	0.0649437	0.29	0.04	0.055	1
19	52819102	ZNF480	0.065	NA	NA	0.065	NA
3	119301139	ADPRH	0.0650966	0.51	0.3	0.0045	0.93
1	32713033	FAM167B	0.0653241	0.0023	0.98	0.56	0.51
3	37996477	CTDSPL	0.0653261	0.018	0.39	0.38	NA
2	44066247	ABCG8	0.0654307	0.17	0.19	0.054	0.37
3	37034021	EPM2AIP1	0.065463	NA	0.026	0.21	0.49
6	75797302	COL12A1	0.0654682	0.82	0.77	0.0093	0.11
6	110533410	CDC40	0.0654719	NA	NA	0.039	0.31
10	123842325	TACC2	0.0654984	0.025	0.72	0.133	0.27
6	26240711	HIST1H4F	0.0655161	0.11	NA	0.11	NA
3	50655190	MAPKAPK3	0.0655261	0.28	0.25	0.21	0.044
5	176885499	DBN1	0.0656151	0.0104	0.94	0.17	0.39
14	101347482	RTL1	0.0656267	0.6	0.46	0.0027	0.87
16	71682830	PHLPP2	0.0656813	0.49	0.92	0.12	0.012
15	74632009	CYP11A1	0.0657089	0.55	0.57	0.37	0.0056
14	24423002	DHRS4	0.0657367	NA	0.27	0.045	NA
10	21804386	SKIDA1	0.0657799	0.091	0.11	0.25	0.26
7	116770651	ST7	0.065782	NA	0.52	0.014	0.37
3	56658871	FAM208A	0.065803	0.5	0.0014	1	0.93
12	85255476	SLC6A15	0.0659085	0.38	0.029	0.94	0.063
17	47394825	ZNF652	0.06591	0.79	0.9	0.00137	0.67
9	38068162	SHB	0.065913	0.053	NA	NA	0.23
2	189599373	DIRC1	0.0659467	0.16	0.042	0.12	0.81
11	62444985	UBXN1	0.0659467	0.84	0.24	0.018	0.18
6	127611098	ECHDC1	0.066	NA	NA	0.066	NA
3	38080952	DLEC1	0.0660594	0.74	0.118	0.125	0.06
5	154203082	C5orf4	0.0661303	0.58	0.87	0.0013	1
17	61278229	TANC2	0.066215	0.97	0.0028	0.55	0.44
1	155039441	EFNA4	0.0663379	0.047	0.087	0.26	0.62
11	65651464	FIBP	0.066546	0.59	0.029	0.049	0.79
1	243332978	CEP170	0.0665745	0.83	0.03	0.11	NA
1	44137257	KDM4A	0.0667701	0.16	0.19	0.03	0.73
6	107088231	QRSL1	0.0667847	0.17	0.41	0.91	0.0105
16	20422874	ACSM5	0.0668119	0.085	0.25	0.049	0.64
15	75122525	CPLX3	0.0670506	0.056	0.26	0.19	NA
16	70843712	HYDIN	0.0670899	0.0044	0.67	0.35	0.65
9	36217445	GNE	0.0671477	0.55	0.18	0.028	NA
18	5891611	TMEM200C	0.0671877	0.052	NA	0.24	NA
19	11096912	SMARCA4	0.0671893	NA	0.24	0.017	0.68
5	74842932	POLK	0.0671982	0.06	0.29	0.046	0.84
10	127438014	C10orf137	0.0673457	0.39	NA	0.0117	0.61
9	95263216	ECM2	0.0674489	0.28	0.23	0.07	0.15
4	119203221	PRSS12	0.0674878	0.48	0.12	0.047	0.25
5	148610251	ABLIM3	0.0675111	0.18	0.12	0.95	0.033
3	44917913	TGM4	0.0676719	0.031	0.63	0.06	0.58
5	146658874	STK32A	0.0677131	NA	NA	0.9	0.014
10	116207642	ABLIM1	0.0678293	0.04	0.87	0.04	0.49
19	17627068	PGLS	0.0679973	0.36	0.11	0.91	0.019
11	60739372	CD6	0.068	NA	NA	0.068	NA
2	108489225	RGPD4	0.068	0.068	NA	NA	NA
12	132323250	MMP17	0.0681883	0.058	0.13	0.16	0.57
10	75562457	NDST2	0.0682435	0.13	0.97	0.014	0.39
16	4847824	ROGDI	0.0682779	0.027	0.11	0.4	0.58
19	41306650	EGLN2	0.0683062	0.029	NA	0.11	0.89
1	236141174	NID1	0.0683752	0.52	0.79	0.41	0.0041
1	11804590	AGTRAP	0.0685091	0.39	0.37	0.04	0.12
2	176944856	EVX2	0.0685965	0.051	0.4	0.14	NA
5	128864375	ADAMTS19	0.0686125	0.79	0.013	0.13	0.52
7	112090748	IFRD1	0.0686299	NA	0.61	0.021	NA
14	54996872	CGRRF1	0.0686938	0.023	0.36	0.24	0.35
10	23609745	C10orf67	0.0687071	0.16	0.11	0.059	0.67
10	77807027	C10orf11	0.0687606	0.12	NA	0.107	NA
15	79177383	MORF4L1	0.0689584	0.72	0.54	0.0074	NA
2	158851771	UPP2	0.0690116	0.46	0.18	0.47	0.018
17	34391721	CCL18	0.0690231	NA	0.0055	0.97	0.54
18	55222169	FECH	0.0691529	0.33	0.018	0.13	0.91
10	12209752	NUDT5	0.0692074	0.0053	0.88	0.62	NA
7	111379198	DOCK4	0.0693376	0.004	0.48	0.49	0.75
11	125787056	DDX25	0.06938	0.045	0.044	0.41	0.87
15	31197015	FAN1	0.0693898	0.13	0.11	0.38	0.13
12	69140339	SLC35E3	0.0694565	NA	1	0.013	NA
1	40756572	ZMPSTE24	0.0694565	NA	NA	0.5	0.026
13	21306070	N6AMT2	0.0695542	0.16	0.13	0.14	NA
8	22481449	BIN3	0.0695941	0.0024	0.8	0.66	0.56
17	39724834	KRT9	0.069614	0.91	0.0053	0.32	0.46
22	42956211	SERHL2	0.069847	0.11	NA	0.119	NA
11	7647098	PPFIBP2	0.0698712	0.15	0.28	0.017	1
13	50306528	KPNA3	0.0699771	NA	NA	0.016	0.82
6	54172879	TINAG	0.0699856	0.57	0.42	0.0046	0.65
1	15495100	C1orf195	0.07	0.07	NA	NA	NA
21	43496247	UMODL1	0.0700042	0.88	0.025	0.31	0.105
1	247978885	OR14A16	0.0700627	0.56	0.88	0.97	0.0015
9	26995562	LRRC19	0.0700794	0.13	0.22	0.38	0.066
6	40998140	UNC5CL	0.0701295	0.51	0.44	0.0032	1
3	50645081	CISH	0.0704298	NA	0.49	0.72	0.0084
1	40980559	DEM1	0.0704533	0.021	NA	0.63	NA
11	116728531	SIK3	0.0706052	1	0.0071	0.14	0.73
6	122773119	SERINC1	0.070614	0.014	0.27	0.64	0.3
19	57174993	ZNF835	0.0706404	0.95	0.52	0.35	0.0042
20	55904965	SPO11	0.0706955	0.33	0.81	0.85	0.0032
19	3959299	DAPK3	0.0707223	NA	0.54	0.023	0.24
7	102389833	FAM185A	0.0707536	0.29	NA	0.0121	0.85
14	51372238	PYGL	0.0708072	0.52	0.73	0.32	0.006
1	33333378	FNDC5	0.071	NA	NA	0.071	NA
17	73987590	TEN1	0.071	0.071	NA	NA	NA
1	91781518	HFM1	0.0710617	0.13	0.24	0.27	0.087
11	119043656	NLRX1	0.0713167	0.14	0.56	0.47	0.02
19	45448084	APOC4	0.071451	0.14	0.4	0.054	NA
8	39603992	ADAM2	0.0714661	0.0025	0.6	0.53	0.93
22	29835060	RFPL1	0.0717045	0.026	NA	0.52	NA
15	69325606	NOX5	0.0717468	0.029	0.95	1	0.027
1	41976351	HIVEP3	0.0718309	0.023	0.24	0.75	0.18
4	7062894	GRPEL1	0.072	NA	NA	0.072	NA
7	142124170	TRBV6-8	0.072	0.072	NA	NA	NA
6	28327371	ZKSCAN3	0.0720485	0.085	NA	0.16	NA
10	293358	ZMYND11	0.0720485	NA	NA	0.034	0.4
17	58503180	C17orf64	0.0721654	0.009	0.37	0.23	0.98
10	101090246	CNNM1	0.0722741	0.031	0.48	0.64	0.079
19	39908214	PLEKHG2	0.0723452	0.21	0.69	0.13	0.04
20	36531798	VSTM2L	0.0724146	0.35	0.035	0.11	0.56
14	21967946	METTL3	0.0726727	NA	0.74	0.0045	0.93
6	149925801	KATNA1	0.0726793	0.31	0.48	0.0102	0.5
16	85667528	KIAA0182	0.0726948	0.013	0.069	0.91	0.93
17	60741917	MRC2	0.0727116	0.082	0.18	0.49	0.105
1	236700807	LGALS8	0.0727207	0.41	0.62	0.36	0.0083
12	55725690	OR6C3	0.0727244	NA	0.2	0.5	0.031
6	28497339	GPX5	0.0728349	0.081	0.94	0.025	0.4
4	41631718	LIMCH1	0.0728349	0.27	0.05	0.12	0.47
14	102894593	TECPR2	0.0728557	0.37	0.75	0.61	0.0045
12	49165648	ADCY6	0.0728619	0.0093	0.37	0.27	0.82
16	22358636	CDR2	0.073	NA	NA	0.073	NA
11	66995590	KDM2A	0.073	NA	NA	0.073	NA
4	71888176	DCK	0.0730577	0.104	0.25	0.12	NA
10	27497191	ACBD5	0.0730669	0.78	0.77	0.91	0.0014
1	218475847	RRP15	0.0731587	0.11	0.44	0.018	0.88
17	42328579	SLC4A1	0.0731614	0.34	0.025	0.82	0.11
8	117658742	EIF3H	0.0731635	NA	0.063	0.22	NA
4	3109095	HTT	0.0733861	0.53	0.17	0.45	0.019
9	125377087	OR1Q1	0.0735569	0.29	0.86	0.0124	0.25
15	39909953	FSIP1	0.0736723	0.41	0.022	0.35	NA
10	104404416	TRIM8	0.0736906	NA	0.99	0.0058	0.55
15	30927362	ARHGAP11B	0.0737618	NA	0.2	0.07	NA
9	32541880	TOPORS	0.0737904	0.109	0.22	0.27	0.12
20	33442648	GGT7	0.0738898	0.61	NA	0.023	NA
11	47008768	C11orf49	0.0738994	0.0069	0.55	0.76	0.27
4	90816252	MMRN1	0.0739767	0.05	0.25	0.52	0.12
7	22985219	FAM126A	0.0740002	NA	0.76	0.019	0.22
5	89769728	AC093510.2	0.0740631	NA	0.027	0.19	0.62
11	74705602	NEU3	0.0740714	0.025	0.11	0.49	0.58
8	142222331	SLC45A4	0.0741406	0.0057	0.73	0.19	0.99
1	6685308	THAP3	0.0741598	0.25	0.87	0.006	0.6
19	54387497	PRKCG	0.0742419	0.86	0.21	0.43	0.0101
6	73951407	KHDC1	0.074423	0.15	0.81	0.27	0.024
20	32659935	RALY	0.0745707	0.013	0.45	0.5	0.27
5	147024446	JAKMIP2	0.0745871	0.55	0.19	0.63	0.012
7	151078993	WDR86	0.0745871	0.0019	0.72	0.75	0.77
11	22387179	SLC17A6	0.0746472	0.3	0.51	0.11	0.047
1	1361736	TMEM88B	0.074954	0.18	0.81	0.014	0.39
11	47611672	C1QTNF4	0.075	NA	NA	0.075	NA
7	100855180	PLOD3	0.0750157	0.69	0.38	0.19	0.016
13	20978318	CRYL1	0.0750392	NA	0.13	0.11	NA
19	58967625	ZNF324B	0.0750392	0.11	NA	0.13	NA
7	100841467	MOGAT3	0.0750912	0.24	0.36	0.028	0.33
11	118895670	TRAPPC4	0.0751437	0.28	0.23	0.17	0.073
6	24503590	ALDH5A1	0.0752402	0.77	0.32	0.013	0.25
7	119915432	KCND2	0.0752515	NA	0.41	0.035	NA
2	99858946	LYG2	0.0752994	0.83	0.46	0.0021	1
6	42832562	KIAA0240	0.0753597	0.5	0.41	0.89	0.0044
6	112382236	WISP3	0.0754123	0.79	0.68	0.0022	0.68
1	111663161	DRAM2	0.0754636	0.048	NA	0.3	NA
5	137451371	NME5	0.0754636	NA	NA	0.024	0.6
15	25207298	SNURF	0.0754673	NA	0.84	0.72	0.0054
10	118960774	KCNK18	0.0757502	NA	0.48	0.018	0.38
11	58892090	FAM111B	0.0757698	NA	0.51	0.28	0.023
19	49797664	SLC6A16	0.0758667	0.06	0.13	0.13	0.8
5	43487210	C5orf34	0.0759528	NA	0.0107	0.4	0.77
15	45408056	DUOXA2	0.076	NA	NA	0.076	NA
6	52871155	ICK	0.076	NA	NA	0.076	NA
4	108816771	SGMS2	0.076	NA	NA	0.076	NA
1	114249302	PHTF1	0.0760929	0.022	0.49	0.18	0.42
9	35870001	OR13J1	0.07617	0.75	0.97	0.66	0.0017
2	172926226	METAP1D	0.0762238	0.56	0.0024	0.8	0.76
11	1013992	MUC6	0.0764421	0.25	0.57	0.0072	0.8
4	174090004	GALNT7	0.0766509	0.034	0.58	0.22	0.19
15	33855175	RYR3	0.0767035	0.039	0.029	0.96	0.76
2	15372562	NBAS	0.0767441	0.33	0.0043	0.6	0.97
9	139981627	MAN1B1	0.0768031	0.048	0.99	0.02	0.87
6	43109751	PTK7	0.0769569	0.35	0.17	0.34	0.041
3	9792107	OGG1	0.076986	0.084	0.76	1	0.013
12	102811624	IGF1	0.077	NA	NA	0.077	NA
9	125551738	OR5C1	0.0770742	0.38	0.85	0.0033	0.78
2	10186419	KLF11	0.0771126	0.034	0.19	0.92	0.14
1	28240648	RPA2	0.0771858	0.014	0.24	0.31	0.8
5	42800866	SEPP1	0.0771983	0.75	0.0042	0.54	0.49
10	75574840	CAMK2G	0.0772385	NA	0.78	0.019	NA
2	158140806	GALNT5	0.0772656	0.46	0.012	0.84	0.18
11	130058437	ST14	0.0773799	0.55	0.045	0.13	0.26
5	141974913	FGF1	0.0774318	0.43	0.41	0.25	0.019
1	97547947	DPYD	0.0774425	0.0042	0.55	0.98	0.37
8	48878875	MCM4	0.077634	0.26	0.035	0.33	0.28
20	31021211	ASXL1	0.0776489	0.68	0.021	0.31	0.19
9	138457640	PAEP	0.0777656	NA	0.75	0.0059	0.77
8	28625704	INTS9	0.0778275	0.88	NA	0.017	NA
6	24828449	FAM65B	0.0779071	0.18	0.11	0.07	0.61
17	37093490	FBXO47	0.0779815	0.84	0.21	0.04	0.12
7	106685640	PRKAR2B	0.078	0.078	NA	NA	NA
5	122506469	PRDM6	0.0780317	0.0083	0.75	0.55	NA
15	41060197	DNAJC17	0.0780706	0.012	0.42	0.51	0.33
1	249211096	PGBD2	0.0781407	0.11	0.99	0.39	0.02
8	125989460	ZNF572	0.0782573	0.06	0.11	0.43	0.3
19	50212024	CPT1C	0.0782785	0.014	0.117	0.52	1
17	79993919	DCXR	0.0783349	0.76	0.0017	0.66	1
9	21409584	IFNA8	0.0784991	NA	0.84	0.018	NA
10	293358	AL589988.1	0.0788342	NA	NA	0.038	0.4
12	29659798	TMTC1	0.0789812	0.58	0.073	0.12	0.17
8	144671390	EEF1D	0.0789823	0.56	0.99	0.19	0.0082
12	133721109	CTD-2140B24.4	0.079	NA	NA	0.079	NA
1	67220450	TCTEX1D1	0.079	NA	NA	0.079	NA
2	103321124	SLC9A2	0.0790472	0.84	0.13	0.012	0.66
13	33261295	PDS5B	0.0790703	0.38	0.069	0.055	0.6
2	242716380	GAL3ST2	0.0792239	0.41	0.24	0.49	0.018
1	15599021	FHAD1	0.0794188	0.094	0.34	0.058	0.47
20	34054790	CEP250	0.0795094	0.22	0.57	0.58	0.012
8	23106860	CHMP7	0.0796284	0.081	NA	0.19	NA
15	91475018	HDDC3	0.0796702	0.14	NA	0.11	NA
5	121413205	LOX	0.0796702	NA	0.14	NA	0.11
8	17067959	ZDHHC2	0.0796702	0.44	NA	0.035	NA
16	1308156	TPSD1	0.0797027	NA	0.6	0.012	0.49
11	65636053	EFEMP2	0.0797449	0.47	0.53	0.0064	0.55
16	8620007	TMEM114	0.0798306	0.53	0.038	0.89	0.049
1	110919703	SLC16A4	0.0799085	0.8	0.49	0.0051	0.44
3	50355730	HYAL2	0.08	NA	0.08	NA	NA
12	57618853	NXPH4	0.08	0.08	NA	NA	NA
19	39876714	PAF1	0.08	NA	NA	0.08	NA
12	77439823	E2F7	0.0800588	0.53	0.58	0.0041	0.7
6	41753915	PRICKLE4	0.0800821	0.2	0.022	0.59	0.34
16	1995499	RPL3L	0.080126	0.024	0.78	0.39	0.121
17	73552185	LLGL2	0.08018	0.88	0.97	0.0074	0.14
21	35890409	RCAN1	0.080343	0.051	0.07	0.35	0.71
1	54562010	TCEANC2	0.0803536	0.6	0.79	0.0048	0.39
19	8138038	FBN3	0.080508	0.2	0.25	0.02	0.89
2	62066986	FAM161A	0.0805483	0.54	0.26	0.52	0.0122
1	25599057	RHD	0.0806483	0.035	0.38	0.11	0.61
7	150164111	GIMAP8	0.0806696	0.6	0.31	0.024	0.2
11	112050057	BCO2	0.0806954	0.69	0.72	0.0058	0.31
13	20398669	ZMYM5	0.0807641	0.34	0.79	0.0045	0.74
1	111957201	OVGP1	0.0808248	0.92	0.0046	0.23	0.92
6	32713099	HLA-DQA2	0.0809584	0.16	0.66	0.0109	0.78
3	20017598	RAB5A	0.081	NA	NA	0.081	NA
14	69521474	DCAF5	0.0811101	0.05	0.87	0.046	0.45
1	109878893	SORT1	0.0812224	0.23	0.35	0.19	0.059
8	145580028	FBXL6	0.0812842	0.98	0.67	0.0043	0.32
6	13584370	SIRT5	0.0813018	0.014	0.36	0.72	NA
22	31521404	INPP5J	0.0813301	0.94	0.13	0.37	0.02
6	47680159	GPR115	0.0814238	0.74	0.039	0.043	0.73
5	177577923	NHP2	0.0814785	NA	0.065	0.14	0.4
4	187509931	FAT1	0.0815607	0.47	0.068	0.029	0.98
3	4704816	ITPR1	0.0816239	0.79	0.35	0.0143	0.23
3	58512237	ACOX2	0.0817667	0.014	0.23	0.48	0.59
14	21161784	ANG	0.0818399	0.19	0.068	0.076	0.93
22	17618937	CECR5	0.0818819	0.17	0.28	0.2	0.096
12	6909315	CD4	0.0819298	0.55	0.036	0.22	0.21
16	27472772	GTF3C1	0.0819389	0.66	0.32	0.0057	0.76
12	75442007	KCNC2	0.082	NA	NA	0.082	NA
21	46117792	KRTAP10-12	0.082	0.082	NA	NA	NA
7	18631186	HDAC9	0.0820069	0.87	1	0.0013	0.81
6	31627091	C6orf47	0.0822029	0.41	0.0063	0.89	0.4
7	1024855	CYP2W1	0.0822077	0.34	0.023	0.28	0.42
7	44431978	NUDCD3	0.082223	0.52	0.52	0.0042	0.81
19	58757770	ZNF544	0.0822541	0.18	0.64	0.047	0.17
1	19401331	UBR4	0.0828053	0.54	0.5	0.065	0.053
11	88911122	TYR	0.082875	0.4	0.95	0.43	0.0057
7	141490219	TAS2R5	0.0829735	0.48	0.8	0.003	0.81
4	126238090	FAT4	0.0829953	0.52	0.032	0.066	0.85
3	30769819	GADL1	0.0830718	0.57	0.71	0.021	0.11
7	102574453	LRRC17	0.0831153	0.51	0.56	0.0039	0.84
2	234386134	USP40	0.0831364	0.52	0.25	0.024	0.3
7	12610451	SCIN	0.0831893	0.012	0.66	0.13	0.91
4	17635336	FAM184B	0.083291	0.45	0.53	0.0041	0.96
2	113496554	CKAP2L	0.0833758	0.58	0.43	0.029	0.13
15	77907420	LINGO1	0.0834827	0.017	NA	0.96	NA
14	58910784	KIAA0586	0.0835022	0.016	0.51	0.15	0.77
5	89769728	MBLAC2	0.0835094	NA	0.032	0.19	0.62
22	50926768	MIOX	0.0835766	0.55	0.024	0.13	0.55
3	42727434	KBTBD5	0.0835996	0.004	0.36	0.79	0.83
8	54965220	LYPLA1	0.0837296	NA	0.026	0.63	NA
12	105519873	KIAA1033	0.0837945	0.22	0.11	0.044	0.89
2	207162033	ZDBF2	0.0837961	0.12	0.45	0.039	0.45
16	30964690	ORAI3	0.0839351	NA	0.053	0.31	NA
3	46062676	XCR1	0.084	NA	NA	0.084	NA
10	43971579	ZNF487P	0.084	0.084	NA	NA	NA
14	102675837	WDR20	0.0841084	0.091	0.39	0.79	0.034
2	202575717	ALS2	0.0842557	0.19	0.013	0.45	0.86
7	138264079	TRIM24	0.0843956	0.69	0.33	0.061	0.069
15	56736681	MNS1	0.0843985	0.37	0.78	0.81	0.0041
6	112453955	LAMA4	0.0845045	0.012	0.57	0.26	0.54
10	134021576	STK32C	0.0846268	0.49	NA	0.28	0.028
3	65342135	MAGI1	0.0846614	0.14	0.084	0.39	0.21
7	150500527	TMEM176A	0.0846796	0.59	0.046	0.71	0.05
20	44577623	ZNF335	0.0848302	0.18	0.72	0.0105	0.71
17	42744238	C17orf104	0.0849107	0.033	0.077	0.68	0.56
19	48495314	BSPH1	0.085	NA	NA	0.085	NA
4	159592875	C4orf46	0.085	0.085	NA	NA	NA
15	76629250	ISL2	0.085	NA	NA	0.085	NA
8	27950736	ELP3	0.085124	NA	NA	0.44	0.038
8	25101205	DOCK5	0.0851549	0.27	0.36	0.25	0.04
6	35803103	SRPK1	0.085158	NA	0.57	1	0.0068
4	87622503	PTPN13	0.0853217	1	0.125	0.015	0.52
3	148712019	GYG1	0.0853356	0.5	0.83	0.0025	0.94
16	69390938	TERF2	0.085385	0.88	0.75	0.029	0.051
9	113088516	TXNDC8	0.0854907	0.58	0.24	0.028	NA
6	31630172	GPANK1	0.0854912	0.014	0.33	0.29	0.73
16	89288548	ZNF778	0.085588	1	0.71	0.2	0.0069
19	17547292	TMEM221	0.0856102	0.02	0.26	0.65	0.29
17	4835895	GP1BA	0.0857545	0.19	0.103	0.054	0.93
16	23767202	CHP2	0.0858464	0.97	NA	0.86	0.0047
2	105858990	GPR45	0.0860226	NA	0.077	0.22	NA
5	1212453	SLC6A19	0.0861421	0.39	0.47	0.3	0.018
4	88231429	HSD17B13	0.086317	0.31	0.16	0.022	0.91
19	51322484	KLK1	0.0864481	NA	0.45	0.08	0.11
7	44621720	TMED4	0.0866744	0.57	NA	0.03	NA
13	50594486	KCNRG	0.0866744	0.095	NA	0.18	NA
19	14165204	PALM3	0.0868375	0.12	0.119	0.27	0.26
2	74274329	TET3	0.0869573	0.65	0.92	0.004	0.42
1	201009011	CACNA1S	0.0870151	0.97	0.135	0.64	0.012
12	109182653	SSH1	0.0870664	0.62	0.11	0.82	0.018
9	74305020	TMEM2	0.0871394	0.61	0.51	0.027	0.12
5	52193287	ITGA1	0.0873011	0.46	0.23	0.091	0.105
17	48823124	LUC7L3	0.0874058	0.36	NA	0.048	NA
5	139661097	PFDN1	0.0874543	NA	0.0117	0.37	0.93
1	63063616	ANGPTL3	0.0876492	NA	NA	0.034	0.51
17	43226796	HEXIM1	0.0877303	NA	0.031	0.56	NA
7	73944252	GTF2IRD1	0.0877778	0.83	0.63	0.0026	0.75
2	152127212	NMI	0.0879116	0.65	0.63	0.64	0.0039
10	85901354	GHITM	0.088	NA	NA	0.088	NA
20	44313483	WFDC10B	0.088	NA	NA	NA	0.088
8	87153758	ATP6V0D2	0.0881034	0.74	0.42	0.0033	1
10	60549037	BICC1	0.0882587	0.25	0.034	0.22	0.55
3	98001777	OR5H2	0.0882737	0.033	0.43	0.25	0.29
6	109748082	PPIL6	0.0882972	NA	0.25	0.07	NA
8	146156638	ZNF16	0.0886348	0.86	0.4	0.7	0.0043
1	156900320	LRRC71	0.0887707	0.068	0.053	0.72	0.4
2	152276870	RIF1	0.0887707	0.16	0.036	0.53	0.34
1	182025839	ZNF648	0.0889707	0.14	0.038	0.22	0.89
1	10068261	RBP7	0.0890402	0.56	0.016	0.97	0.12
20	19915770	RIN2	0.0890408	0.074	0.81	0.116	0.15
1	43239274	C1orf50	0.0891003	0.53	0.72	0.48	0.0057
3	128344786	RPN1	0.0891451	0.46	0.007	0.59	0.55
7	139728476	PARP12	0.0891724	0.0064	NA	0.98	0.66
7	97933588	BAIAP2L1	0.0892184	0.31	0.54	0.025	0.25
7	33380556	BBS9	0.0893299	0.14	0.26	0.16	0.18
3	42555351	VIPR1	0.0893491	0.032	0.88	0.76	0.049
8	192947	ZNF596	0.089372	0.119	0.58	0.38	0.04
19	53050882	ZNF808	0.0895621	0.34	0.04	0.43	0.18
2	163055267	FAP	0.0896065	0.86	0.0044	0.32	0.87
15	83428128	FSD2	0.0897385	0.15	0.13	0.057	0.95
15	51217361	AP4E1	0.0897803	0.4	0.76	0.0044	0.79
16	68772239	CDH1	0.0898712	0.3	0.036	0.2	0.49
11	119180610	MCAM	0.09	NA	NA	0.09	NA
8	7215821	ZNF705G	0.09	0.09	NA	NA	NA
7	121942849	FEZF1	0.0901702	0.94	0.33	0.0049	0.7
5	68487643	CENPH	0.090171	0.19	0.028	1	0.2
11	67809268	TCIRG1	0.0901949	0.32	0.11	0.54	0.056
21	46101933	KRTAP12-1	0.0902084	0.52	0.65	0.63	0.005
[truncated: 13,941 more rows]

## Sheet: STable16
Supplementary Table 16: All meta-analysis p-values using Indo-European cohorts only for EMMAX-CMC
Chr	Pos	Gene	Meta-pvalue	EPICNorfolk	BDES	IECC	REHS
1	77510163	ST6GALNAC5	5.323e-11	NA	NA	5.323e-11	NA
19	18497024	GDF15	6.32491e-10	0.9879	NA	8.498e-08	1.897e-05
1	175130119	KIAA0040	4.553e-07	0.9802	NA	0.3403	6.176e-09
12	2968078	FOXM1	6.01382e-07	0.9551	0.5178	0.4109	1.463e-09
2	10262920	RRM2	8.7187e-07	NA	0.2754	0.00952	1.613e-06
19	12995797	KLF1	1.287e-06	1.287e-06	NA	NA	NA
19	47177800	PRKD2	1.86855e-06	0.9862	0.5503	0.8019	2.53e-09
1	153580155	S100A16	1.99083e-06	0.7055	0.2927	5.129e-08	NA
3	33840234	PDCD6IP	3.37e-06	NA	NA	3.37e-06	NA
7	127292442	SND1	6.28687e-06	0.03078	0.02204	0.09451	7.072e-05
3	178922361	PIK3CA	7.145e-06	NA	NA	7.145e-06	NA
2	48807796	STON1	7.62863e-06	0.05277	0.001386	0.003168	0.02456
16	77850832	VAT1L	9.77616e-06	0.6025	0.5276	1.984e-07	NA
12	86198594	RASSF9	1.14421e-05	0.3958	0.8716	0.1085	2.451e-07
1	154302929	ATP8B2	1.17938e-05	0.02069	0.9507	0.05833	8.287e-06
2	48807796	STON1-GTF2A1L	2.08038e-05	0.04327	0.0009739	0.007664	0.05767
2	175962173	ATF2	2.51086e-05	0.2141	0.2558	0.09752	4.362e-06
3	196098796	UBXN7	2.60782e-05	0.1903	0.05799	3.438e-06	0.6424
1	2441358	PANK4	3.07532e-05	NA	NA	0.01578	0.0001389
17	76115441	TMC6	4.71034e-05	0.02138	0.7301	0.469	6.753e-06
5	157098756	C5orf52	9.08655e-05	0.001099	0.00751	0.09693	NA
19	51503966	KLK8	9.36269e-05	0.1547	4.718e-05	NA	NA
9	21141080	IFNW1	9.77848e-05	0.6873	0.1657	0.7219	1.452e-06
8	145223240	HEATR7A	0.000113121	0.4801	0.5285	0.8419	6.67e-07
16	3273905	ZNF200	0.000116914	0.1602	0.1183	1.219e-05	0.642
18	61377472	SERPINB11	0.000125048	0.3575	0.001792	0.2206	0.001139
3	52570892	C3orf78	0.000130804	0.8262	NA	2.648e-06	0.557
4	48894868	OCIAD2	0.000151669	NA	0.2615	4.714e-05	NA
8	101717149	PABPC1	0.00015906	0.1334	NA	9.732e-05	NA
12	71519116	TSPAN8	0.000176798	0.8142	0.4893	0.7465	8.262e-07
18	11851686	CHMP1B	0.0001954	NA	NA	0.0001954	NA
3	128780823	GP9	0.0001958	NA	NA	0.0001958	NA
21	34640788	IL10RB	0.000233683	NA	0.5078	0.7138	6.598e-06
14	93652787	RP11-371E8.4	0.000244338	0.006623	0.7843	0.009296	0.007571
1	248844830	OR14I1	0.000245892	0.02581	0.1928	0.01416	0.005229
5	1318491	CLPTM1L	0.000250367	0.0001075	0.2971	0.0237	0.4977
14	30046460	PRKD1	0.000251645	NA	0.5569	0.02919	0.0001604
9	132501906	PTGES	0.000274	NA	NA	0.000274	NA
12	53491511	IGFBP6	0.0003567	NA	NA	0.0003567	NA
19	863220	CFD	0.000426131	NA	0.3861	0.4504	2.78e-05
10	43659382	CSGALNACT2	0.00044786	NA	7.442e-05	0.5412	NA
9	116854714	KIF12	0.000469772	0.4635	0.05333	0.361	9.209e-05
16	85834818	COX4I1	0.00048628	NA	NA	8.322e-05	0.5298
12	13237998	GSG1	0.000541992	0.006973	0.3094	0.002053	0.2218
19	16764936	C19orf42	0.000547557	0.7358	0.6488	1.361e-05	NA
11	73141742	FAM168A	0.0005594	NA	NA	0.0005594	NA
8	32453358	NRG1	0.000561359	0.6179	0.3564	0.4952	9.413e-06
7	24742437	DFNA5	0.00058619	0.6613	0.3004	0.8847	6.166e-06
10	84711247	NRG3	0.00058794	0.6986	0.2835	0.1091	5.034e-05
3	46414557	CCR5	0.000592816	0.1546	0.7551	0.3322	2.834e-05
17	38925270	KRT26	0.000596592	0.003479	0.04033	0.5434	0.01453
16	86544651	FOXF1	0.0006147	NA	NA	0.0006147	NA
19	8576629	ZNF414	0.000614936	0.003575	NA	0.01597	NA
1	109656946	KIAA1324	0.000636282	0.4042	0.1369	0.09685	0.0002241
11	62763248	SLC22A8	0.000646527	0.8705	0.4956	0.2509	1.132e-05
8	107773675	ABRA	0.00065127	NA	0.0001236	0.4921	NA
1	204507383	MDM4	0.000670178	0.4156	0.697	0.5169	8.561e-06
5	140011867	CD14	0.000687405	NA	0.7561	0.194	5.798e-05
17	48940422	TOB1	0.000696789	0.6514	NA	0.0001006	NA
2	113404460	SLC20A1	0.000702977	0.1047	0.5141	0.1478	0.0001711
2	113479614	NT5DC4	0.0007081	0.0007081	NA	NA	NA
1	11073982	TARDBP	0.000710239	0.1634	NA	0.0004096	NA
17	4684084	TM4SF5	0.000738005	0.9428	NA	7.406e-05	NA
18	25532304	CDH2	0.000811042	0.6471	8.135e-06	0.7775	0.3982
8	144808572	FAM83H	0.000867785	0.003834	0.04776	0.01069	0.9068
10	72192832	NODAL	0.00086979	0.845	NA	9.909e-05	NA
9	107331464	OR13C8	0.000881729	0.08796	0.9026	0.03432	0.0006647
3	49004687	ARIH2	0.0008895	NA	NA	0.0008895	NA
1	150482145	ECM1	0.000899903	0.3433	0.02765	0.0005578	0.351
4	165961915	TRIM60	0.00091645	0.09922	0.1685	0.002361	0.04818
5	37303392	NUP155	0.000918194	NA	0.0957	0.0002251	0.557
13	31712572	HSPH1	0.000919664	0.5035	0.5503	0.271	2.544e-05
5	167993100	PANK3	0.000922822	NA	0.02107	0.004243	NA
17	68128259	KCNJ16	0.000932428	0.564	0.1478	0.5993	3.891e-05
10	125771945	CHST15	0.00104126	0.6459	0.008089	0.8524	0.000502
1	152006266	S100A11	0.00104295	0.04284	0.07865	0.004146	NA
10	114724358	TCF7L2	0.001206	NA	NA	0.001206	NA
12	7894056	CLEC4C	0.00122078	0.004222	NA	0.02888	NA
3	10089689	FANCD2	0.00123562	0.1589	0.08178	0.005075	0.04214
12	52681460	KRT81	0.00124026	0.1529	0.8329	0.02055	0.001067
15	75931966	IMP3	0.00132457	0.22	0.0009623	0.09791	0.1465
9	116152053	ALAD	0.00139542	0.7102	NA	0.2276	0.0001225
17	41365196	TMEM106A	0.00144384	4.91e-05	NA	0.4476	0.9387
1	27432204	SLC9A1	0.00147659	0.746	0.9611	0.06584	7.391e-05
20	62496735	TPD52L2	0.0014945	0.007522	0.01499	0.06219	0.5053
6	33247085	WDR46	0.001526	NA	0.7939	0.002187	0.0127
17	39880966	HAP1	0.00153813	0.4831	0.7965	0.0001113	0.08584
9	37486603	POLR1E	0.00157945	0.0009549	0.00659	0.634	0.9533
1	27250580	NUDC	0.00159346	NA	0.1017	0.1315	0.001737
4	84015850	PLAC8	0.001606	NA	NA	0.001606	NA
17	16347205	FAM211A	0.0016151	0.8458	NA	0.6852	4.074e-05
16	5097947	C16orf89	0.00165814	0.05543	0.007652	0.01045	0.9133
10	124672351	FAM24A	0.001688	NA	NA	0.001688	NA
3	49215404	RP11-694I15.6	0.00169505	NA	0.008234	0.02134	NA
19	58517342	CTD-2368P22.1	0.001705	0.001705	NA	NA	NA
14	20711005	OR11H4	0.00174261	0.2894	0.1095	0.007077	0.01924
5	66478729	CD180	0.00179195	NA	0.1017	0.8004	0.0003288
12	104187732	NT5DC3	0.00183349	0.3397	0.8653	0.6568	2.386e-05
11	59856240	MS4A2	0.00183633	0.1883	0.5048	0.9136	5.315e-05
20	43353380	WISP2	0.00184429	0.07106	NA	0.002717	NA
6	46623698	SLC25A27	0.00185093	0.1882	NA	0.00103	NA
14	73961982	HEATR4	0.00197234	0.9904	0.6958	0.4128	1.779e-05
10	118427779	C10orf82	0.00197528	0.2271	NA	0.0009179	NA
20	54824029	MC3R	0.00198275	0.165	NA	0.003836	0.04779
3	52448051	PHF7	0.00200292	0.0001669	0.4451	0.4122	NA
19	855753	ELANE	0.00200366	0.4533	0.0002185	NA	0.3093
7	84628989	SEMA3D	0.00201086	0.4695	0.7127	0.06846	0.0002265
18	44260159	ST8SIA5	0.00202412	0.01312	0.6252	0.4325	0.001475
1	209964080	IRF6	0.002068	NA	NA	0.002068	NA
22	30887555	SEC14L4	0.00207838	0.3874	0.2338	0.4722	0.0001266
5	14601182	FAM105A	0.00209438	0.001467	0.3724	0.01696	0.5902
3	11600807	VGLL4	0.00210233	0.02786	0.00295	0.3951	NA
15	100269365	LYSMD4	0.00211601	0.01186	0.08458	0.3427	0.01612
12	108140094	PRDM4	0.0021888	0.0006088	0.5853	0.05055	0.3214
9	5534924	PDCD1LG2	0.00223668	0.0118	0.08246	0.2045	0.02992
12	96260923	CCDC38	0.00224953	NA	NA	0.8331	0.0002894
20	44166646	WFDC6	0.002307	NA	NA	0.002307	NA
4	667173	ATP5I	0.00231078	0.002074	NA	0.1198	NA
7	156468427	RNF32	0.00235736	NA	0.0001467	0.3978	0.6394
5	40934471	C7	0.00237554	0.2316	0.2872	0.0006927	0.1397
5	77311229	AP3B1	0.00238974	0.6464	0.08407	0.1581	0.000755
7	142417019	U66061.31	0.002448	0.002448	NA	NA	NA
16	66919667	PDP2	0.00245249	0.9718	0.1655	0.0001102	0.3785
1	186303520	TPR	0.00255891	0.8912	0.09697	0.3344	0.0002453
5	71516795	MRPS27	0.00269655	0.01801	0.4646	0.3354	0.002704
5	40841741	CARD6	0.00269685	0.0007053	0.1414	0.4061	0.1874
3	149290675	WWTR1	0.0027277	0.2879	0.2835	0.979	9.64e-05
1	177242718	FAM5B	0.00274292	NA	0.004878	0.01077	0.8541
11	24759780	LUZP2	0.00274327	NA	NA	0.2626	0.001147
5	78985833	CMYA5	0.00274999	0.4984	0.258	0.02781	0.002177
7	940181	ADAP1	0.00275142	0.0003036	NA	0.4823	0.3076
5	61747557	IPO11	0.00275221	0.1692	0.000396	0.4262	0.2729
9	95993170	WNK2	0.00278331	0.5305	0.4157	0.0001729	0.2074
11	63713377	NAA40	0.00281084	0.3799	0.4131	0.5699	8.956e-05
11	68527074	CPT1A	0.00285322	0.1869	0.01323	0.008138	0.4059
20	25058398	VSX1	0.00286484	0.6238	0.1539	0.08616	0.0009927
21	45649954	ICOSLG	0.002939	NA	NA	0.002939	NA
14	69341650	ACTN1	0.00296048	NA	0.0004508	0.7279	NA
6	116599859	TSPYL1	0.0029821	0.7315	0.004664	0.01253	0.2024
6	27860534	HIST1H3J	0.003012	0.003012	NA	NA	NA
7	72717986	NSUN5	0.00303968	0.6622	0.515	0.01924	0.001352
9	132481557	PRRX2	0.00309	NA	NA	0.00309	NA
5	176759170	LMAN2	0.00312765	0.01871	0.2747	0.5499	0.003258
19	55556527	RDH13	0.00318373	NA	0.7887	0.2131	0.0003203
9	108424845	TAL2	0.003203	NA	NA	0.003203	NA
5	71739602	ZNF366	0.00324418	0.6043	0.2513	8.931e-05	0.7122
16	56508775	OGFOD1	0.00324801	0.469	0.5695	0.7465	4.852e-05
5	140864784	PCDHGC4	0.00335631	0.004356	0.9629	0.01639	0.1469
1	12907457	HNRNPCL1	0.003406	0.003406	NA	NA	NA
19	45810035	CKM	0.00342448	0.8224	0.6011	0.2741	7.652e-05
2	102472459	MAP4K4	0.00346465	0.3132	0.09732	0.0004111	0.8402
19	7735140	RETN	0.00347919	NA	0.3361	0.0001822	0.9801
7	76019590	SRCRB4D	0.00349049	0.06048	0.3931	0.06763	0.006612
11	5878609	OR52E8	0.003491	0.003288	0.08438	0.1633	0.2347
14	52174899	FRMD6	0.00349487	NA	0.001748	0.1062	0.3251
2	74787273	C2orf65	0.00351328	0.03587	0.5356	0.0005669	0.9845
16	88643633	ZC3H18	0.00358462	0.1744	0.7568	0.7349	0.0001135
11	67400566	TBX10	0.00358526	0.006739	0.2431	0.1688	0.03982
20	62705874	RGS19	0.00358552	0.002984	NA	0.1722	0.1212
6	132636774	MOXD1	0.00359776	0.7558	0.08301	0.007826	0.02253
14	105958536	C14orf80	0.00364391	0.155	0.04851	0.2567	0.005828
2	165765194	SLC38A11	0.00364927	0.1107	0.8281	0.006635	0.01853
2	217542888	IGFBP5	0.00368783	0.2254	NA	0.6468	0.0004422
19	39292689	LGALS4	0.00376172	0.2616	0.6098	0.09345	0.0007868
1	31769528	SNRNP40	0.00377958	0.2214	0.001347	0.2228	NA
15	90794102	TTLL13	0.00380551	0.4137	0.003354	0.0302	0.2842
9	136531857	SARDH	0.00382451	0.635	0.1628	0.06801	0.001705
5	140762533	PCDHGA7	0.00384625	0.09961	0.8689	0.2382	0.0005858
12	93196332	EEA1	0.00393253	0.4328	0.4538	0.0002783	0.2275
2	211060050	ACADL	0.00393643	NA	0.01092	0.04143	NA
19	21990464	ZNF43	0.003963	NA	NA	0.003963	NA
11	73686548	UCP2	0.00399831	0.002918	NA	0.1578	NA
14	21249869	RNASE6	0.004021	NA	NA	0.004021	NA
9	136501728	DBH	0.00402779	0.724	0.01467	0.002629	0.4596
14	101195335	DLK1	0.00403463	0.9712	0.5948	0.5178	4.3e-05
1	214454770	SMYD2	0.00404573	0.0005534	0.1225	0.279	0.6825
5	128864375	ADAMTS19	0.0041012	0.5453	0.003803	0.02003	0.3164
6	108029194	SCML4	0.00411396	0.001661	NA	0.2863	NA
11	35456061	PAMR1	0.00411952	0.002097	0.144	0.3431	0.1276
11	55999737	OR5T2	0.0041343	0.1194	0.009664	0.0942	0.1222
1	45224990	KIF2C	0.00413695	NA	0.6127	0.2453	0.0004941
1	44877962	RNF220	0.00414339	NA	NA	0.5628	0.0008518
12	7280924	RBP5	0.004157	NA	0.004157	NA	NA
11	56344260	OR5M10	0.004222	NA	NA	0.004222	NA
10	67680203	CTNNA3	0.00423966	0.4447	0.2679	0.8506	0.0001355
7	151791365	GALNT11	0.00424582	0.02774	0.2404	0.007859	0.2625
6	131206394	EPB41L2	0.00431532	0.3221	0.1907	0.7403	0.0003091
6	53133964	ELOVL5	0.00432584	0.7617	0.008525	0.02039	0.1065
12	31446744	FAM60A	0.004351	NA	NA	0.004351	NA
7	150164111	GIMAP8	0.00435928	0.39	0.1065	0.005278	0.06498
7	99227172	ZNF498	0.00457856	0.9617	0.5472	0.03391	0.0008518
9	138903523	NACC2	0.00460984	0.01518	0.05424	0.1576	0.1182
12	101133748	ANO4	0.00472022	0.0003154	0.1325	0.5151	0.7352
15	78917316	CHRNB4	0.00473077	0.2733	0.007336	0.455	0.0174
1	154184993	C1orf43	0.00477468	NA	0.3671	0.0009864	0.2448
13	106119492	DAOA	0.004776	NA	NA	0.004776	NA
1	113638551	LRIG2	0.00498712	0.08383	0.1895	0.05596	0.01915
22	20043504	C22orf25	0.00498813	NA	0.02301	0.03769	0.1079
12	50571079	LIMA1	0.00499951	0.2417	0.6928	0.0001082	0.9427
19	49797664	SLC6A16	0.00502162	0.01031	0.02453	0.1363	0.4984
10	17275861	VIM	0.00506279	0.9141	NA	0.0006581	NA
16	57596371	GPR114	0.00509606	0.1837	0.000879	0.2244	0.4835
2	75891858	GCFC2	0.00527934	0.2562	0.6754	0.001674	0.06339
19	14521875	DDX39A	0.00529408	NA	0.2325	0.002722	NA
19	36940622	ZNF566	0.00533352	NA	0.00302	0.5287	0.06368
14	25043671	CTSG	0.0053456	NA	0.0463	0.01382	NA
15	65208099	ANKDD1A	0.00536743	0.001823	0.9039	0.06332	0.1799
12	49165648	ADCY6	0.00539162	0.00262	0.1131	0.07083	0.8997
17	9873043	GAS7	0.00539364	NA	0.08948	0.0157	0.07339
4	8376719	ACOX3	0.00544158	0.06346	0.3668	0.09852	0.008336
3	43121410	GTDC2	0.00553069	NA	0.1714	0.0518	0.01198
16	77759403	NUDT7	0.00560742	0.0541	0.308	0.9235	0.001293
7	92158154	RBM48	0.00565559	0.5994	0.9193	0.2744	0.0001331
2	128631565	AMMECR1L	0.00565687	NA	0.6659	0.7403	0.0002219
3	15717421	ANKRD28	0.00582419	0.2569	0.1144	0.01068	0.06668
11	65307727	LTBP3	0.00586627	0.6957	0.5877	0.1111	0.0004652
5	140558064	PCDHB8	0.00600769	NA	0.4248	0.6028	0.0004604
21	43733628	TFF3	0.00603146	0.3344	0.9459	0.3275	0.0002117
1	67474795	SLC35D1	0.00614653	0.0001572	0.7561	0.2087	0.9067
17	64685078	PRKCA	0.00618429	0.6693	0.01492	0.01224	NA
7	5982996	RSPH10B	0.00623423	0.2975	NA	0.002562	NA
4	175413228	HPGD	0.00623566	NA	NA	0.003174	0.2402
1	57397497	C8B	0.00625549	0.05941	0.07112	0.01069	0.5098
9	8404560	PTPRD	0.0062971	0.2513	0.004744	0.1696	0.1149
21	42694870	FAM3B	0.00633385	NA	NA	0.08184	0.009483
18	22048821	HRH4	0.00633998	NA	0.8885	0.01048	0.01354
10	4872930	AKR1E2	0.006476	NA	NA	0.006476	NA
1	32842319	BSDC1	0.00648504	0.003051	0.041	0.4176	0.4626
5	93489746	KIAA0825	0.00650954	0.7825	0.005886	0.1541	0.03422
12	122657198	IL31	0.00651037	0.003009	0.5808	0.07457	NA
22	20800848	KLHL22	0.0065834	0.1572	0.592	0.00142	NA
6	42153428	GUCA1B	0.00665899	0.3495	NA	0.002351	NA
1	158669740	OR6K2	0.00669451	NA	0.1454	0.01736	0.05346
2	210517915	MAP2	0.00674347	0.427	0.202	0.2684	0.0011
16	85667528	KIAA0182	0.00676825	0.002449	0.015	0.8001	0.8707
11	17323361	NUCB2	0.006786	NA	NA	0.006786	NA
1	6324747	ACOT7	0.00682263	0.006401	0.2698	0.08001	NA
11	61179392	CPSF7	0.006882	NA	NA	0.006882	NA
5	151771817	NMUR2	0.00691474	0.04017	0.07065	0.01306	0.7106
15	90610546	ZNF710	0.00692948	0.3629	0.1833	0.002118	NA
7	131189142	PODXL	0.00701664	0.4042	0.09607	0.002305	0.3001
3	183774762	HTR3C	0.00709561	0.4005	0.02024	0.4645	0.007242
19	10794630	ILF3	0.00713511	0.1375	0.2549	0.00355	0.2208
11	33308084	HIPK3	0.00715442	0.1694	0.003727	0.3568	0.1224
3	121575986	EAF2	0.00721779	0.4996	0.0005866	0.204	0.4667
17	79632308	OXLD1	0.007227	NA	NA	0.007227	NA
12	48596241	OR10AD1	0.00723059	0.1208	0.003545	0.1145	0.5704
16	57147265	CPNE2	0.00731674	NA	NA	0.0009537	0.9594
17	706933	NXN	0.00734704	0.000655	0.3585	0.6456	NA
19	47768128	CCDC9	0.00736831	0.6706	0.01701	0.02333	0.1078
3	112724619	C3orf17	0.00737692	0.794	0.02985	0.5294	0.00229
19	12637384	ZNF564	0.00738047	NA	0.03817	0.02421	NA
9	5231539	INSL4	0.00741699	0.9766	0.005629	0.5299	0.009936
20	42885925	GDAP1L1	0.00749211	NA	0.08035	0.0117	NA
11	46801859	CKAP5	0.00751496	0.8766	0.4945	0.03224	0.002108
21	46875564	COL18A1	0.00757859	0.00512	0.4756	0.1804	0.06783
6	153323570	MTRF1L	0.007618	NA	0.007618	NA	NA
17	27225611	DHRS13	0.00763685	0.09165	0.9657	0.001798	NA
9	27172662	TEK	0.00776447	0.06606	0.1748	0.2586	0.01031
7	44663949	OGDH	0.00777175	0.1572	0.008238	0.2822	0.08435
21	45548437	AP001055.7	0.007796	NA	NA	0.007796	NA
11	43905557	ALKBH3	0.00783955	0.02289	0.173	0.08764	0.08987
8	71619238	XKR9	0.00787259	0.7233	0.3807	0.0002889	0.3943
20	30053322	DEFB124	0.0080317	0.01387	0.1055	0.09702	0.227
7	157208773	DNAJB6	0.00804232	NA	0.318	0.003206	NA
10	13214753	MCM10	0.00808639	0.2606	0.006195	0.02765	0.7286
14	24658776	RP11-468E2.2	0.00818525	0.002374	NA	0.4382	NA
16	8953028	CARHSP1	0.00823412	0.1401	0.9748	0.4418	0.0005524
17	58503180	C17orf64	0.00825282	0.00357	0.1932	0.05251	0.9231
17	48460399	LRRC59	0.008314	NA	NA	0.008314	NA
5	141021294	FCHSD1	0.00831945	0.3622	0.4225	0.6135	0.00036
9	33750845	PRSS3	0.00848025	0.217	0.5127	0.6819	0.0004572
19	15052665	OR7C2	0.00856158	0.003476	NA	0.3151	NA
20	61451333	COL9A3	0.008569	0.2797	0.2212	0.05304	0.01072
11	4608061	OR52I2	0.008594	NA	NA	0.008594	NA
5	141974913	FGF1	0.0086267	0.2065	0.2208	0.08163	0.009538
6	47202564	TNFRSF21	0.00863289	0.1195	0.5894	0.005199	0.09704
2	172823030	HAT1	0.008667	0.008667	NA	NA	NA
20	1099523	PSMF1	0.00875688	0.8861	0.4717	0.0001555	0.5574
2	29344334	CLIP4	0.008774	0.003378	0.08108	0.3531	0.3756
6	49439805	CENPQ	0.00880817	0.2827	0.6231	0.001081	NA
6	20486920	E2F3	0.00881725	0.9376	0.2883	0.000362	0.3737
2	234967597	SPP2	0.008839	NA	NA	0.008839	NA
15	78873272	CHRNA5	0.00890763	NA	0.7486	0.4641	0.0005559
11	89947246	CHORDC1	0.008973	NA	NA	0.008973	NA
13	43148653	TNFSF11	0.00897788	0.03734	0.04178	0.03958	0.6069
1	117944822	MAN1A2	0.00910459	0.006548	NA	0.1795	NA
21	43767595	TFF2	0.00918147	NA	NA	0.3043	0.0039
4	57164441	KIAA1211	0.00920837	0.9506	0.9318	0.0001521	0.2879
22	45681971	UPK3A	0.00923168	0.001587	0.295	0.1511	0.5502
9	140322570	NOXA1	0.00927545	0.01318	0.6455	0.005804	0.7933
12	53819697	AMHR2	0.00936179	0.2189	NA	0.005544	NA
1	8073700	ERRFI1	0.00942269	0.005376	0.8216	0.1377	0.0658
3	119526176	NR1I2	0.00943811	0.05855	0.3195	0.1537	0.01395
20	18471068	RBBP9	0.00944143	0.05186	NA	0.02363	NA
2	27720201	GCKR	0.00946798	0.06956	0.07229	0.008839	0.9063
19	55879672	IL11	0.0095493	0.4668	0.0003471	0.6931	0.3629
19	2290767	LINGO3	0.00967209	0.267	0.05122	0.01567	NA
11	65361256	KCNK7	0.00974504	NA	0.8824	0.5682	0.0004315
15	74632009	CYP11A1	0.00978341	0.1879	0.3746	0.4885	0.001225
3	44917913	TGM4	0.00979525	0.007782	0.6794	0.008639	0.9237
12	47471393	AMIGO2	0.00982929	0.189	0.0553	0.02433	0.1667
6	136882715	MAP3K5	0.00984046	0.5229	0.0006068	0.6903	NA
15	89056292	DET1	0.00985336	0.6719	0.406	0.9275	0.0001681
2	189898846	COL5A2	0.00986214	0.4196	0.9528	0.0006325	0.1684
12	10958658	TAS2R8	0.0098763	0.3162	0.08653	0.2026	0.007697
19	19625992	TSSK6	0.00996625	NA	0.1242	0.0105	NA
19	58639296	ZNF329	0.0100457	0.08466	0.009394	0.1176	0.4669
8	142222331	SLC45A4	0.010117	0.001898	0.2619	0.1089	0.8145
6	50811026	TFAP2B	0.0101474	0.2842	0.1142	0.1484	0.009192
19	47995358	NAPA	0.0101959	NA	NA	0.35	0.003825
9	80851369	CEP78	0.0102074	0.4656	0.04591	0.7864	0.002655
3	138218994	CEP70	0.0102181	0.8964	0.2508	0.07833	0.002538
13	48881492	RB1	0.0102224	0.4041	0.7828	0.01719	0.008224
8	67341714	RRS1	0.0102789	0.419	0.8717	0.01049	0.01176
17	1371376	MYO1C	0.0104148	0.9525	0.7944	0.008142	0.007446
14	23587838	CEBPE	0.010482	NA	0.2973	0.0208	0.03837
2	160585617	2021-03-07	0.0105055	0.5366	0.389	0.02463	0.009029
16	89167094	ACSF3	0.0105829	0.003959	0.5816	0.3744	0.05439
1	2106723	PRKCZ	0.0106103	0.9176	0.4571	0.0005745	NA
9	132591560	C9orf78	0.0106947	0.1905	0.5196	0.002459	NA
15	72122642	MYO9A	0.0107037	0.01671	0.6897	0.5442	0.007593
8	126021414	SQLE	0.0107355	0.5794	0.6205	0.3619	0.0003675
10	90673024	STAMBPL1	0.0107467	0.07328	0.006269	0.3344	0.3117
10	102566298	PAX2	0.01076	NA	NA	0.01076	NA
21	47766113	PCNT	0.0108783	0.5894	0.1912	0.4034	0.001071
15	33855175	RYR3	0.0108857	0.05313	0.004309	0.4839	0.4399
15	75890934	SNUPN	0.0108903	0.005337	0.169	0.779	0.0694
1	156437816	MEF2D	0.010998	0.0003519	0.7514	0.367	0.5093
19	54722250	LILRB3	0.011	0.011	NA	NA	NA
12	105424109	ALDH1L2	0.011072	0.1022	0.02652	0.04027	0.457
12	52282060	ANKRD33	0.0111628	0.4108	0.007997	0.03379	0.4544
1	231829752	DISC1	0.0111849	0.8043	0.003608	0.4832	0.03607
12	110207078	FAM222A	0.0113351	0.6998	0.7349	0.01516	0.006607
17	26976071	SDF2	0.0114074	0.07838	NA	0.01944	NA
6	31627091	C6orf47	0.0114884	0.1321	0.00282	0.3752	0.3754
11	62444985	UBXN1	0.011514	0.6573	0.1355	0.004735	0.1248
7	142919509	TAS2R40	0.0115179	0.7727	NA	0.001994	NA
2	37353472	EIF2AK2	0.01171	NA	NA	0.01171	NA
9	108363426	FKTN	0.0117161	0.004965	0.1459	0.5516	0.1349
4	55524252	KIT	0.0117287	0.01994	0.4119	0.01172	0.5608
19	4844790	PLIN3	0.0117673	0.625	0.07553	0.00135	0.8509
5	176734179	MXD3	0.0119019	0.07242	NA	0.02156	0.1786
16	569014	RAB11FIP3	0.0120836	NA	0.1064	0.003774	0.708
20	62187187	C20orf195	0.0121007	0.05652	0.006111	0.8246	NA
7	101928495	SH2B2	0.0121941	NA	0.001839	0.8949	NA
5	80736449	SSBP2	0.012209	NA	0.3721	0.5786	0.001338
11	65617501	SNX32	0.01225	NA	NA	0.01225	NA
20	61340732	NTSR1	0.0123369	0.03864	0.005747	0.4715	0.5527
1	43212869	LEPRE1	0.0124955	0.4301	0.2388	0.1777	0.003227
21	27852724	CYYR1	0.012542	0.0001493	0.7315	0.754	0.7189
3	142769891	U2SURP	0.01259	0.01259	NA	NA	NA
3	50337932	HYAL1	0.0126043	0.6472	0.05387	0.01091	0.1567
9	135285802	C9orf171	0.0127603	0.1673	0.6505	0.004179	0.1333
3	179371154	USP13	0.012839	0.01054	0.6848	0.01923	0.4405
3	42727434	KBTBD5	0.0128866	0.001636	0.1954	0.4105	0.4683
9	136233510	SURF4	0.01293	NA	NA	0.01293	NA
16	58537777	NDRG4	0.0129521	0.1056	0.03067	0.4602	0.04152
1	222801235	MIA3	0.0129606	0.2867	0.6427	0.05763	0.005833
13	114078558	ADPRHL1	0.0130025	0.7671	0.3126	0.00127	0.2043
11	116728531	SIK3	0.0130324	0.9963	0.00408	0.04075	0.3768
2	62066986	FAM161A	0.0130445	0.6561	0.04535	0.1496	0.01404
2	150071156	LYPD6B	0.0131256	0.003157	0.922	0.05203	0.4162
11	123810603	OR4D5	0.0133053	0.05346	0.5378	0.3471	0.006436
1	247751731	OR2G2	0.01339	NA	NA	0.01339	NA
7	108205125	THAP5	0.01342	NA	NA	0.01342	NA
1	153390626	S100A7A	0.0136066	0.5275	NA	0.001259	0.4982
20	55904965	SPO11	0.013617	0.1913	0.7324	0.4049	0.001169
2	238475250	PRLH	0.01369	NA	NA	0.01369	NA
7	140710396	MRPS33	0.0138723	NA	NA	0.606	0.003153
4	53740210	SCFD2	0.013906	0.1709	0.05904	0.1242	0.05448
19	2276301	C19orf35	0.0139621	0.1378	NA	0.01397	NA
16	74657852	RFWD3	0.0140148	0.8631	0.009897	0.01321	0.6116
1	11804590	AGTRAP	0.0141878	0.3664	0.3038	0.0195	0.03234
9	95874559	C9orf89	0.0141936	0.09629	0.1062	0.03741	0.1836
4	73943154	ANKRD17	0.014209	0.07081	0.7895	0.313	0.00402
1	26365751	SLC30A2	0.0142393	0.01139	0.05934	0.5189	NA
12	113645362	IQCD	0.0142595	0.1135	0.5962	0.9987	0.001046
2	70074757	GMCL1	0.01433	NA	0.04686	0.04234	NA
6	151869451	CCDC170	0.0143515	0.2331	0.3393	0.03252	0.02773
7	141672604	TAS2R38	0.0144491	NA	0.7868	0.002546	NA
2	233391306	CHRND	0.0144919	0.4167	0.09003	0.00195	0.9882
10	104210861	C10orf95	0.01456	NA	NA	0.01456	NA
12	53900640	NPFF	0.0147537	0.1812	0.003423	0.5918	NA
13	107211797	ARGLU1	0.01481	NA	NA	0.01481	NA
5	36217959	NADKD1	0.0148355	NA	0.523	0.222	0.003184
4	8021340	ABLIM2	0.0150138	0.9017	0.5706	0.0002564	0.5756
11	22387179	SLC17A6	0.0150358	0.2635	0.2693	0.03163	0.0339
12	64664420	C12orf56	0.0150462	0.004253	0.3846	0.08987	0.5181
2	61415378	USP34	0.0150572	0.08315	0.5487	0.06692	0.02497
17	48445503	MRPL27	0.01511	NA	NA	0.01511	NA
3	139237264	RBP1	0.0152466	NA	0.005695	0.3744	NA
6	109748082	PPIL6	0.0152819	NA	0.1251	0.01709	NA
11	68673601	IGHMBP2	0.0153087	0.4694	0.001967	0.3225	0.262
16	3022997	PKMYT1	0.01531	NA	NA	0.01531	NA
7	195594	FAM20C	0.0153476	NA	0.2642	0.04299	0.034
22	45749966	SMC1B	0.0154426	0.8555	0.1019	0.04423	0.02048
11	18158958	MRGPRX3	0.0154635	0.1681	0.006503	0.3567	NA
1	162351752	RP11-565P22.6	0.0155443	NA	0.06139	0.5083	0.01258
16	31099011	RP11-196G11.1	0.0155767	0.001536	NA	0.3198	0.8013
16	1584377	TMEM204	0.0156	NA	NA	0.0156	NA
1	111854889	CHIA	0.0156329	0.6464	0.8412	0.0977	0.001512
4	185582954	CCDC111	0.0156939	0.02956	0.2247	0.0328	0.3707
6	149826740	PPIL4	0.0158259	0.005535	NA	0.4023	NA
1	162351752	C1orf226	0.015845	NA	0.06139	0.521	0.01258
11	13402787	ARNTL	0.01588	NA	NA	0.01588	NA
22	19118992	TSSK2	0.0159082	0.256	NA	0.07466	0.02116
20	35835826	RPN2	0.0159163	NA	0.8734	0.04251	0.0109
10	91198917	SLC16A12	0.0159504	0.0009765	0.8696	0.4779	NA
5	176885499	DBN1	0.0159833	0.005726	0.7903	0.06701	0.2732
22	30489945	HORMAD2	0.0159925	0.0466	0.257	0.06428	0.1077
20	23669488	CST4	0.01606	NA	NA	0.01606	NA
19	51379798	KLK2	0.0161675	0.2043	0.4314	0.3482	0.002743
20	10386013	MKKS	0.0161936	0.1295	0.02053	0.5247	0.06048
17	7907385	GUCY2D	0.0162051	0.8938	0.02042	0.1255	0.03687
20	57875916	EDN3	0.0163	NA	NA	0.0163	NA
9	123667304	TRAF1	0.0163036	0.1887	0.00543	0.4074	NA
19	58199291	AC004017.1	0.01633	0.01633	NA	NA	NA
7	20418829	ITGB8	0.0164431	NA	0.01681	0.9064	0.0277
1	109315291	STXBP3	0.016476	NA	NA	0.364	0.006411
2	26804247	CIB4	0.0166369	0.09077	0.3578	0.02039	0.1323
17	55027965	COIL	0.0167522	0.009502	0.1047	0.1236	0.7194
3	100093896	TOMM70A	0.0167537	0.3026	0.002803	0.2061	0.5061
13	25255705	ATP12A	0.0167539	0.7303	0.581	0.001445	0.1443
14	100847338	WDR25	0.0168194	0.9478	0.7399	0.7787	0.0001629
21	43496247	UMODL1	0.0168259	0.3587	0.05821	0.1658	0.02571
15	75116809	LMAN1L	0.0168767	0.01734	0.02057	0.298	0.8409
12	13061294	GPRC5A	0.0169155	0.6972	0.01885	0.009512	0.7173
10	104163729	PSD	0.0170478	0.1733	0.0483	0.05931	0.1826
3	149192678	TM4SF4	0.0170657	NA	NA	0.4151	0.005857
17	62582265	SMURF2	0.0170989	0.2301	NA	0.01059	NA
15	83330603	AP3B2	0.0172876	NA	0.0007596	0.622	0.953
7	100210597	MOSPD3	0.0173036	0.5796	0.006336	0.3432	0.07344
17	78968905	CHMP6	0.01736	0.01736	NA	NA	NA
17	76157044	C17orf99	0.0174515	0.0773	0.9118	0.002529	0.5255
12	91357976	EPYC	0.0174624	0.6156	0.0148	0.7024	0.01465
11	117052799	SIDT2	0.0175372	0.09684	0.6499	0.001846	0.8118
11	836407	CD151	0.0176144	0.01339	0.1884	NA	NA
13	48571013	SUCLA2	0.0176379	0.6908	0.3157	0.3449	0.001264
3	37996477	CTDSPL	0.0176849	0.01662	0.248	0.1125	NA
16	30004819	HIRIP3	0.0177506	0.0894	0.1243	0.009886	0.8732
5	177577923	NHP2	0.0178972	NA	0.06702	0.03067	0.2291
15	90794102	RP11-697E2.6	0.0179894	0.2246	0.009691	0.2178	NA
12	123214372	HCAR1	0.018004	0.2884	0.1908	0.7642	0.002327
12	121647974	P2RX4	0.0180283	0.1706	0.8223	0.006618	0.1056
4	70723299	SULT1E1	0.0180767	NA	0.5845	0.02376	0.03435
8	133141798	KCNQ3	0.0180784	0.1655	0.3777	0.004111	0.383
19	11200268	LDLR	0.0181297	0.2548	0.7053	0.001001	0.5493
8	125989460	ZNF572	0.0181414	0.0606	0.04772	0.2385	0.1434
11	48510435	OR4A47	0.01834	0.01834	NA	NA	NA
1	155911517	RXFP4	0.0183703	0.3791	0.3892	0.1166	0.005851
3	187446211	BCL6	0.0183743	0.04184	0.09595	0.9422	0.02662
1	155160270	MUC1	0.0184179	0.3649	0.002116	0.5278	0.2479
1	63063616	ANGPTL3	0.0184847	NA	NA	0.01092	0.2444
1	24484171	IL28RA	0.0185119	NA	0.07237	0.2702	0.02516
1	92161298	TGFBR3	0.0186141	0.05063	0.3614	0.03059	0.1832
17	46239844	SKAP1	0.0186162	NA	NA	0.06909	0.03895
14	94503780	OTUB2	0.0186339	0.007466	NA	0.3612	0.184
12	12509865	LOH12CR2	0.01864	0.01864	NA	NA	NA
7	154738409	PAXIP1	0.0188136	0.3438	0.00331	0.3514	0.2603
19	49244220	IZUMO1	0.0188602	0.05704	0.5039	0.5146	0.007062
3	133877002	RYK	0.01894	NA	NA	0.01894	NA
11	4944650	OR51G1	0.0189537	0.3618	0.7728	0.0006942	0.5419
8	41504012	NKX6-3	0.01902	NA	NA	0.01902	NA
10	63445837	C10orf107	0.0190673	0.5597	0.1379	0.006304	0.218
11	119043656	NLRX1	0.0191755	0.1502	0.8964	0.1695	0.004685
6	29364508	OR12D2	0.0192183	0.0035	0.1563	0.4946	0.3964
10	27687225	PTCHD3	0.0192321	0.06984	0.228	0.006866	0.982
20	42086724	SRSF6	0.0192518	0.8521	0.3413	0.00178	NA
9	84605749	FAM75D1	0.0192783	0.3172	0.4759	0.02305	0.03096
1	40980559	DEM1	0.0194012	0.00671	NA	0.4209	NA
6	42559926	UBR2	0.0194157	NA	0.2044	0.00391	0.6549
1	53320274	ZYG11A	0.0194359	0.02463	0.9013	0.4077	0.01204
17	3627037	ITGAE	0.0195142	0.01036	0.7673	0.0253	0.5449
2	186603660	FSIP2	0.0195806	0.07384	0.01641	0.1534	0.5924
15	78582044	WDR61	0.01962	0.01962	NA	NA	NA
2	158140806	GALNT5	0.0196769	0.9325	0.001777	0.2697	0.2481
17	74003846	EVPL	0.0196921	0.01787	0.04488	0.2773	0.4991
5	40764876	PRKAA1	0.01972	NA	NA	NA	0.01972
1	68171235	GNG12	0.0199176	0.003275	NA	0.8893	NA
9	100364783	TSTD2	0.0199327	0.08231	0.01722	0.1659	0.4802
13	21306070	N6AMT2	0.0199383	0.1433	0.08525	0.04435	NA
8	6371240	ANGPT2	0.0199626	0.2314	0.3054	0.001836	0.8721
1	246907377	SCCPDH	0.0199986	0.3392	0.3532	0.405	0.002338
7	80374318	SEMA3C	0.0200432	0.02022	0.07462	0.7607	0.09915
2	170336095	BBS5	0.0200787	0.05152	0.2329	0.02729	0.3484
2	170336095	RP11-724O16.1	0.0200787	0.05152	0.2329	0.02729	0.3484
1	172501617	SUCO	0.0201042	0.6728	0.158	0.3525	0.00305
1	23836478	E2F2	0.0201307	0.7802	0.04796	0.008728	0.3506
14	102675837	WDR20	0.0201722	0.1018	0.2796	0.3225	0.01251
3	47374680	KLHL18	0.02018	NA	NA	0.02018	NA
9	20363474	MLLT3	0.0202706	0.2494	NA	0.04069	0.05455
17	35872409	DUSP14	0.0202717	NA	0.425	0.4361	0.002987
7	102716226	ARMC10	0.0202746	0.4381	0.02211	0.05281	0.2261
1	163117163	RGS5	0.0203561	0.9829	NA	0.03387	0.01672
17	33802156	SLFN12L	0.0204885	0.4699	0.07607	0.01059	0.3101
20	62191282	RP4-697K14.7	0.0205029	0.3575	0.185	0.8341	0.00213
2	9593064	CPSF3	0.0205335	NA	0.05244	0.5656	0.01898
11	44931280	TSPAN18	0.02055	NA	NA	0.02055	NA
20	31368202	DNMT3B	0.0207584	0.3262	0.9977	0.04862	0.007557
2	37395103	SULT6B1	0.0208757	NA	0.3899	0.5351	0.002757
1	43055036	CCDC30	0.020916	0.236	0.5247	0.001008	0.9683
5	138378394	SIL1	0.0209339	0.00137	0.4337	0.7993	0.2548
7	36552772	AOAH	0.0209834	0.3809	0.001738	0.2942	0.6234
14	23235822	OXA1L	0.021259	0.03912	0.04959	0.5865	0.1087
12	66546100	RP11-745O10.4	0.0212677	0.8658	0.6887	0.1904	0.00109
5	158702232	UBLCP1	0.0213	NA	NA	0.0213	NA
19	56693562	GALP	0.0213677	0.2986	0.766	0.006659	0.08179
19	1244381	ATP5D	0.02143	NA	NA	0.02143	NA
11	61015916	PGA4	0.02147	0.02147	NA	NA	NA
11	61015916	PGA5	0.02147	0.02147	NA	NA	NA
17	31260307	TMEM98	0.0215	NA	NA	0.0215	NA
10	99527407	SFRP5	0.0215515	0.007462	0.1934	0.4155	NA
9	135251366	TTF1	0.0216039	NA	0.3364	0.005857	0.3053
3	155649576	GMPS	0.0216419	NA	0.1823	0.01761	NA
14	24040436	JPH4	0.02166	NA	NA	0.02166	NA
1	55451872	TMEM61	0.0218201	0.258	0.7448	0.4571	0.001461
7	97933588	BAIAP2L1	0.0219124	0.15	0.8515	0.01025	0.09861
12	56142670	GDF11	0.0220721	0.9962	0.7444	0.1066	0.00165
9	117792583	TNC	0.022079	0.09285	0.2212	0.00759	0.8371
7	36194028	EEPD1	0.0221581	0.1689	0.2731	0.5909	0.004812
21	38128859	HLCS	0.0221736	0.05895	0.03405	0.1042	0.6277
3	146251266	PLSCR1	0.0222356	0.4272	0.4525	0.9928	0.0006868
12	121000846	RNF10	0.0222523	0.02418	0.6489	0.605	0.0139
1	43870091	SZT2	0.0222574	0.1553	0.009217	0.2947	0.3129
2	234749258	HJURP	0.0222844	0.05788	0.8409	0.4704	0.005775
1	166829517	TADA1	0.0222886	0.008703	0.8832	0.04909	0.3505
15	102190334	TM2D3	0.022376	0.04697	0.01694	0.2597	0.6436
18	618067	CLUL1	0.0223876	NA	0.09308	0.03589	NA
5	179264450	C5orf45	0.0224119	0.09277	0.026	0.348	0.1588
2	166740469	TTC21B	0.0224523	0.001903	0.4796	0.3823	0.383
12	53497380	SOAT2	0.0226323	0.002497	0.6168	0.8217	0.1068
7	116165144	CAV1	0.0227188	0.1345	NA	0.02527	NA
1	197887095	LHX9	0.02289	NA	NA	0.02289	NA
20	23472459	CST8	0.0229229	NA	0.02115	0.1624	NA
10	127438014	C10orf137	0.0229888	0.307	NA	0.004547	0.4674
20	59829904	CDH4	0.0230573	0.02106	0.9512	0.01413	0.4903
6	146243948	SHPRH	0.023067	0.168	0.08446	0.09642	0.1015
6	31709045	MSH5	0.0231568	0.0003098	0.9525	0.635	0.7452
6	31709045	MSH5-SAPCD1	0.0231568	0.0003098	0.9525	0.635	0.7452
14	81945991	SEL1L	0.0232923	0.1661	0.5833	0.2243	0.006479
16	15797967	MYH11	0.0233403	0.1602	0.002157	0.5029	0.8126
10	74100615	DNAJB12	0.0233444	0.11	0.1897	0.04586	0.1476
4	47455086	COMMD8	0.0234191	0.06891	0.008072	0.3297	0.7737
5	175926081	FAF2	0.0235	NA	NA	0.0235	NA
7	25175698	C7orf31	0.0235065	0.001351	0.6067	0.3233	0.5383
1	215781472	KCTD3	0.0235474	0.3351	0.08801	0.01335	0.3632
11	55904382	OR8J3	0.0235843	NA	0.2726	0.003273	0.7562
9	91083288	SPIN1	0.0235919	0.3201	0.246	0.9201	0.001979
12	33529788	SYT10	0.0236578	NA	0.008817	0.4043	NA
7	6509235	KDELR2	0.0238079	NA	0.05057	0.6324	0.02136
15	85360101	ALPK3	0.0238622	0.003325	0.4489	0.6715	0.1454
6	4116143	ECI2	0.0239303	0.2849	0.1025	0.02355	NA
2	25678275	DTNB	0.0239464	0.005663	0.3194	0.1171	0.6915
6	29911183	HLA-A	0.0239875	0.7569	NA	0.004787	NA
7	24839891	OSBPL3	0.024051	0.0129	0.06902	0.8118	0.2039
11	74705602	NEU3	0.0240711	0.009617	0.1328	0.299	0.3864
22	22599607	VPREB1	0.02416	NA	NA	0.02416	NA
22	42910722	RRP7A	0.0241827	0.008015	NA	0.4564	NA
19	45206676	CEACAM16	0.0242669	0.4385	0.03307	0.02585	0.3982
20	3669165	SIGLEC1	0.0243337	0.1445	0.2281	0.9019	0.005041
12	15102799	ARHGDIB	0.0243668	0.02331	0.8666	0.02571	0.2891
4	44712970	GNPDA2	0.02437	NA	NA	0.02437	NA
1	213032155	FLVCR1	0.0244704	0.6139	0.1084	0.003042	0.7462
20	62292793	RTEL1	0.0244887	0.01369	0.06869	0.2466	0.6521
19	47646779	SAE1	0.0245069	0.01427	NA	0.2604	NA
11	64074743	ESRRA	0.02455	0.02455	NA	NA	NA
5	79949873	DHFR	0.02467	0.02467	NA	NA	NA
15	65345387	SLC51B	0.02469	NA	NA	0.02469	NA
18	9886890	TXNDC2	0.0247222	0.01723	NA	0.2179	NA
3	58413904	PDHB	0.02489	NA	NA	0.02489	NA
1	241823930	WDR64	0.0249154	0.1581	0.1061	0.1431	0.06457
9	140450001	WDR85	0.0249572	0.006865	0.5886	0.5247	0.07328
1	200959302	KIF21B	0.0250281	0.04571	0.4694	0.2169	0.03352
11	32413538	WT1	0.0251985	0.4432	NA	0.008664	NA
5	123974914	ZNF608	0.0252208	0.4595	0.1242	0.00495	0.5583
3	154801978	MME	0.0252378	0.251	0.01596	0.07423	0.5309
17	79077377	BAIAP2	0.02548	NA	NA	0.02548	NA
7	87032531	ABCB4	0.0256211	0.4583	0.1758	0.00429	0.4667
1	213244366	RPS6KC1	0.0256212	0.1673	0.06144	0.7926	0.0198
19	55742803	PPP6R1	0.0256315	0.1559	0.327	0.007943	0.3986
12	302492	SLC6A12	0.025664	0.006577	0.1573	0.2105	0.7425
8	121466092	MTBP	0.0259114	0.3592	0.9975	0.1071	0.004272
8	117658742	EIF3H	0.0259134	NA	0.03506	0.1132	NA
1	223971862	TP53BP2	0.0259616	0.6498	0.1415	0.002564	0.6973
20	55048429	C20orf43	0.02614	NA	NA	0.02614	NA
6	29523676	UBD	0.02614	NA	NA	0.02614	NA
12	8278195	CLEC4A	0.02627	NA	NA	0.02627	NA
3	129150385	MBD4	0.0264714	0.2915	0.1473	0.0584	0.06741
7	94166974	CASD1	0.0264864	0.03214	0.04183	0.3301	0.3812
1	40874410	SMAP2	0.0265032	0.006708	0.3032	0.1964	0.4239
11	533553	HRAS	0.02651	0.02651	NA	NA	NA
11	60636633	ZP1	0.0265534	0.008463	0.3747	0.3037	0.1763
17	4337412	SPNS3	0.0265602	0.3663	0.7923	0.5429	0.001078
13	77566090	CLN5	0.0267645	0.816	NA	0.005053	NA
12	48238757	VDR	0.0267736	0.8525	0.02367	0.07555	0.1127
1	167905024	MPC2	0.027011	0.1193	0.03537	0.8103	0.05089
5	150275777	ZNF300	0.02737	NA	NA	0.02737	NA
17	42744238	C17orf104	0.027454	0.01794	0.07148	0.5525	0.2514
10	129676579	CLRN3	0.0274994	0.09585	0.3201	0.7201	0.008081
22	40417943	FAM83F	0.0275673	0.8579	0.5309	0.005913	0.06653
1	248524992	OR2T4	0.02758	0.02758	NA	NA	NA
19	42792080	CIC	0.027611	0.4351	0.1823	0.002886	0.7845
20	44803287	CDH22	0.0276389	0.305	0.8442	0.04005	0.01744
20	47558417	ARFGEF2	0.0276709	0.5339	0.219	0.0148	0.1041
17	40841014	CNTNAP1	0.0277114	0.3018	0.8978	0.008062	0.08264
10	123842325	TACC2	0.0277549	0.08148	0.4497	0.01889	0.2614
12	32458756	BICD1	0.0278303	0.05444	NA	0.07932	NA
16	75327916	CFDP1	0.0278887	0.9721	0.3876	0.01287	0.03757
1	117249108	C1orf137	0.02792	0.02792	NA	NA	NA
19	19291568	MEF2BNB	0.02803	NA	NA	0.02803	NA
19	19291568	MEF2BNB-MEF2B	0.02803	NA	NA	0.02803	NA
12	31944944	H3F3C	0.02804	NA	NA	0.02804	NA
6	112453955	LAMA4	0.0280663	0.003572	0.7354	0.2692	0.26
11	8414229	STK33	0.0281491	0.01049	0.4479	0.3109	0.1264
19	39689877	NCCRP1	0.0281591	NA	0.005714	0.7663	NA
5	89769728	AC093510.2	0.0282272	NA	0.02231	0.06044	0.634
5	89769728	MBLAC2	0.0282272	NA	0.02231	0.06044	0.634
12	109719428	FOXN4	0.0283002	0.0203	0.06863	0.4131	0.3233
3	36756863	DCLK3	0.0284569	0.08428	0.2528	0.1148	0.07668
17	27000391	SUPT6H	0.0285335	0.3823	0.07222	0.02668	0.2556
3	167747707	GOLIM4	0.0286809	0.05057	0.8074	0.4883	0.009514
6	74072466	KHDC3L	0.0287895	0.2009	0.01352	0.09381	0.7485
1	114340502	RSBN1	0.0288134	0.3021	0.4377	0.002718	0.5313
17	41139295	RUNDC1	0.02883	NA	0.3153	0.01428	NA
10	14816378	FAM107B	0.02883	0.02883	NA	NA	NA
9	127215778	GPR144	0.0288581	0.009801	0.06373	0.4615	0.6639
19	58790675	AC010642.1	0.02889	0.02889	NA	NA	NA
20	53171505	DOK5	0.0290879	NA	0.04691	0.097	NA
19	51837171	VSIG10L	0.0291161	0.01019	0.3052	0.2047	0.3045
3	98001777	OR5H2	0.029305	0.01579	0.989	0.07467	0.1678
11	113194067	TTC12	0.0294345	0.7051	0.02235	0.07269	0.1719
1	247978885	OR14A16	0.0294494	0.5597	0.9614	0.5479	0.0006684
19	44833851	CTC-512J12.6	0.0294697	0.8847	0.06115	0.006293	0.5794
1	11906068	NPPA	0.029547	NA	0.3544	0.01308	NA
14	20924167	APEX1	0.0295785	0.003325	0.8136	0.1472	0.498
1	117113552	CD58	0.02972	NA	NA	0.02972	NA
8	11629070	NEIL2	0.0297444	0.008548	0.06305	0.5328	0.6962
3	42906216	CCBP2	0.0298506	0.9975	0.01831	0.1036	0.1062
15	76668547	SCAPER	0.0299088	0.3364	0.8209	0.02835	0.02574
9	140005147	DPP7	0.0300183	0.2212	0.2382	0.01424	0.27
11	56467898	OR9G1	0.0301615	0.8019	0.8804	0.1727	0.001673
2	42578409	COX7A2L	0.0302976	NA	NA	0.5308	0.008997
12	57317649	SDR9C7	0.0303192	NA	0.1571	0.9915	0.006034
8	144399894	TOP1MT	0.0303795	0.04663	0.2204	0.216	0.09285
10	58118390	ZWINT	0.0304421	0.1331	0.06673	0.07331	0.3175
10	70044031	PBLD	0.0304581	0.05399	NA	0.03782	0.4631
19	45452024	APOC2	0.0305342	0.1812	NA	0.0266	NA
20	31021211	ASXL1	0.0305769	0.3995	0.01155	0.2387	0.1889
2	233735073	C2orf82	0.0306163	NA	0.005832	0.8291	NA
19	56934311	ZNF583	0.03068	NA	NA	0.03068	NA
4	84216649	HPSE	0.0307745	0.6991	0.3852	0.009797	0.0796
14	22434148	TRAV12-3	0.03081	0.03081	NA	NA	NA
6	32781500	HLA-DOB	0.030844	0.19	0.4335	0.06549	0.03906
10	101379915	SLC25A28	0.03091	NA	NA	0.03091	NA
1	159273943	FCER1A	0.0309315	0.3029	0.1125	0.4877	0.01273
19	17972120	RPL18A	0.0309897	NA	0.1223	0.04011	NA
14	93652787	TMEM251	0.0310998	0.0461	0.9431	0.04558	0.1076
17	44055786	MAPT	0.0311284	0.4754	0.4271	0.02298	0.04576
19	16611613	C19orf44	0.0311595	0.6121	0.05713	0.4264	0.01434
1	120293430	HMGCS2	0.0311941	0.0973	0.05465	0.4195	0.09601
5	37815756	GDNF	0.0313303	0.5244	0.1051	0.03374	0.1159
22	31521404	INPP5J	0.0313438	0.7833	0.07432	0.6339	0.005844
10	11047400	CELF2	0.0314283	0.0176	0.26	0.09286	0.5095
12	6687692	CHD4	0.0314791	0.1135	0.5536	0.06224	0.05549
12	122326812	RP11-87C12.2	0.0315173	0.0005425	0.438	0.9539	0.9591
19	18876208	CRTC1	0.03155	0.03155	NA	NA	NA
1	155240602	CLK2	0.0316242	0.09177	0.6912	0.3941	0.008739
4	84502765	AGPAT9	0.0316352	0.0392	0.02631	0.9633	0.22
19	58967625	ZNF324B	0.0316688	0.09292	NA	0.05417	NA
12	131466490	GPR133	0.032104	0.8211	0.01282	0.3798	0.05585
11	57885990	OR9I1	0.032212	0.4369	0.005011	0.4265	0.2403
3	50386402	NPRL2	0.03223	0.03223	NA	NA	NA
5	140682757	SLC25A2	0.0323008	NA	NA	0.673	0.007657
4	119947985	SYNPO2	0.0323572	0.001872	0.6903	0.2287	0.7642
11	124179902	OR8D1	0.0323871	0.08187	0.7717	0.01633	0.2192
16	30774829	RNF40	0.0325467	0.0571	0.5632	0.008174	0.8665
2	37319156	CCDC75	0.0326129	NA	0.1456	0.0358	NA
12	125834800	TMEM132B	0.032698	0.405	0.73	0.125	0.006205
19	12848342	ASNA1	0.03274	NA	NA	0.03274	NA
19	620005	POLRMT	0.0327918	0.01049	0.05958	0.6034	0.6106
7	48266876	ABCA13	0.0328124	0.08003	0.5781	0.2476	0.02012
2	86333401	PTCD3	0.0328465	0.2741	0.2763	0.2994	0.01018
19	50212024	CPT1C	0.0329055	0.006367	0.4168	0.1158	0.7531
22	50926768	MIOX	0.0330513	0.3218	0.06334	0.0467	0.2447
10	44052903	ZNF239	0.0331006	NA	0.00731	0.3784	0.3819
5	140530248	PCDHB6	0.0331052	0.09913	0.05022	0.8577	0.05468
1	16069525	TMEM82	0.0331159	0.2371	0.6819	0.7852	0.00184
17	39680218	KRT19	0.0332553	0.0488	0.4284	0.09207	0.1221
14	24806303	RP11-934B9.3	0.0333346	0.1521	0.1371	0.6214	0.0182
5	137451371	NME5	0.0333435	NA	NA	0.008954	0.5977
17	4835895	GP1BA	0.0334108	0.7109	0.03617	0.01318	0.6982
12	674486	NINJ2	0.0334965	0.5865	0.009636	0.864	0.04864
1	152079989	TCHH	0.0336	0.02207	0.6087	0.118	0.1505
22	30125188	CABP7	0.03362	NA	NA	0.03362	NA
3	170136972	CLDN11	0.0336555	0.07112	NA	0.07609	NA
2	99938565	TXNDC9	0.0336701	0.9279	0.2194	0.008624	0.1363
8	23106860	CHMP7	0.0336845	0.08325	NA	0.06507	NA
2	241631588	AQP12A	0.0337245	0.5009	NA	0.01083	NA
3	49947766	MON1A	0.0337548	0.01142	0.7512	0.9292	0.03013
11	71169480	NADSYN1	0.0337659	0.0257	0.8017	0.1092	0.1068
6	31747510	VARS	0.0337917	0.5527	0.5328	0.525	0.001556
17	19684338	ULK2	0.0338353	0.4216	0.9149	0.0006802	0.9186
8	144522387	ZC3H3	0.0338372	0.6789	0.02602	0.02299	0.5935
5	178409927	GRM6	0.0338957	0.1046	0.02651	0.4718	0.1847
8	99961655	OSR2	0.03391	0.03391	NA	NA	NA
15	78466006	ACSBG1	0.0339683	0.4513	0.6087	0.1112	0.007935
8	25317966	CDCA2	0.0339881	0.7227	0.02772	0.5992	0.02021
2	176944856	EVX2	0.0340056	0.03574	0.2428	0.1262	NA
19	51563876	KLK13	0.03413	0.03413	NA	NA	NA
10	12209752	NUDT5	0.0341381	0.003338	0.9626	0.3426	NA
16	24788549	TNRC6A	0.0342154	0.6821	0.7233	0.1044	0.004756
11	119180610	MCAM	0.03428	NA	NA	0.03428	NA
10	24498169	KIAA1217	0.0343769	0.116	0.6219	0.06788	0.05037
2	232081369	ARMC9	0.0344689	0.9175	0.8983	0.8939	0.0003361
12	32134064	KIAA1551	0.0344791	0.3601	0.634	0.591	0.001836
1	1550992	MIB2	0.0344814	0.07995	0.08448	0.1512	0.2426
11	5372751	OR51B6	0.0346273	0.02603	0.6929	0.6046	0.02286
9	135139826	SETX	0.0346627	0.3383	0.6594	0.04473	0.02502
11	1013992	MUC6	0.0347279	0.1933	0.2741	0.008015	0.5895
3	2908513	CNTN4	0.0348004	0.2825	0.1643	0.03529	0.1533
2	219204592	PNKD	0.0348347	0.8744	0.03712	0.1912	0.04052
22	17446157	GAB4	0.0349042	0.008484	0.208	0.2856	0.5004
12	6747495	ACRBP	0.0350997	0.1833	0.566	0.2441	0.01004
16	2263822	PGP	0.0351059	0.6213	0.0644	0.09924	0.06405
10	23609745	C10orf67	0.0351104	0.09223	0.0749	0.05238	0.703
13	50594486	KCNRG	0.0351849	0.08363	NA	0.06823	NA
19	44341340	ZNF283	0.0353108	0.3791	0.106	0.263	0.02427
2	209027941	CRYGA	0.0353187	0.2536	0.2093	0.006713	0.7201
5	150175109	C5orf62	0.0353189	0.2928	0.5265	0.003451	0.4823
13	101742315	NALCN	0.0353619	0.2263	0.7082	0.07862	0.0204
22	50512705	MLC1	0.035397	0.08298	0.9822	0.02795	0.113
17	8285501	RP11-849F2.7	0.0354482	0.2694	NA	NA	0.02137
17	8285501	RPL26	0.0354482	0.2694	NA	NA	0.02137
16	51171126	SALL1	0.0354558	0.01774	0.1438	0.3365	0.3006
1	15495100	C1orf195	0.03554	0.03554	NA	NA	NA
4	25664351	SLC34A2	0.0355435	0.2619	0.985	0.102	0.009842
1	206243143	C1orf186	0.035554	0.01212	NA	0.4767	NA
13	20978318	CRYL1	0.0355836	NA	0.1046	0.05529	NA
19	8138038	FBN3	0.0356639	0.03152	0.1897	0.06848	0.6356
15	43693969	TUBGCP4	0.0356799	0.4002	0.1103	0.2902	0.02033
7	56174067	CHCHD2	0.0356982	NA	0.2758	0.02105	NA
7	116140419	CAV2	0.03572	NA	NA	0.03572	NA
7	116770651	ST7	0.0358743	NA	0.4506	0.005471	0.4772
8	91094898	CALB1	0.0359036	NA	0.02432	0.3937	0.123
16	68025998	DPEP2	0.0359464	0.02493	0.1221	0.1734	0.4988
9	21206532	IFNA10	0.03596	0.03596	NA	NA	NA
11	6953610	ZNF215	0.0360712	0.1873	0.09773	0.7038	0.02054
6	155618095	TFB1M	0.0360904	0.09599	0.09629	0.03807	0.7526
1	15956880	DDI2	0.03615	NA	NA	0.03615	NA
1	157648533	FCRL3	0.0361616	0.2646	0.03156	0.07947	0.4002
4	165891141	TRIM61	0.03621	0.03621	NA	NA	NA
14	52899110	TXNDC16	0.0362969	0.004859	0.1975	0.3268	0.8515
16	22358636	CDR2	0.03636	NA	NA	0.03636	NA
2	106729219	UXS1	0.036365	0.1463	0.1487	0.05507	NA
20	62572145	UCKL1	0.0364426	0.008264	0.08004	0.7015	0.5789
12	54394284	HOXC9	0.0365505	0.1714	NA	0.03484	NA
7	100172858	LRCH4	0.0366408	0.3176	0.009221	0.3134	0.295
17	61278229	TANC2	0.0367107	0.9367	0.001282	0.5134	0.4404
8	101153024	FBXO43	0.0368898	0.01356	0.1026	0.5331	0.3687
1	23759594	ASAP3	0.0368908	0.1271	0.8811	0.03735	0.06538
5	65317206	ERBB2IP	0.0369385	0.8093	0.04244	0.1261	0.06326
13	113030756	SPACA7	0.0370397	0.1868	NA	0.03248	NA
19	4491797	CTB-50L17.10	0.0370678	0.08872	0.1142	0.2067	0.1315
2	96795608	ASTL	0.0371124	0.006793	0.7043	0.1128	0.5112
10	105727558	SLK	0.0372005	0.3408	0.001924	0.6556	0.644
4	56762938	EXOC1	0.0373526	NA	0.3425	0.9832	0.003688
22	35777185	HMOX1	0.0374234	0.001393	0.908	0.9663	0.2285
1	92428495	BRDT	0.0374479	0.9708	0.002481	0.242	0.4796
9	103066063	TEX10	0.0376327	0.02859	0.1046	0.3149	0.299
3	194408302	FAM43A	0.037836	NA	0.5715	0.01089	NA
12	75442007	KCNC2	0.03788	NA	NA	0.03788	NA
1	112999000	CTTNBP2NL	0.0379659	0.8686	0.3787	0.00235	0.369
10	99190891	PGAM1	0.03804	NA	NA	0.03804	NA
18	30791889	C18orf34	0.03804	0.5081	0.03373	0.03057	0.546
6	153042878	MYCT1	0.0380932	0.517	0.3123	0.0339	0.05237
16	89952262	TCF25	0.0381008	0.5589	0.25	0.003221	0.6371
1	43616475	FAM183A	0.0381291	0.5604	0.6044	0.003371	0.2514
10	69692476	HERC4	0.0381667	0.1858	0.7127	0.7978	0.002721
15	74276995	STOML1	0.0382066	0.7289	0.03885	0.04521	NA
9	107531152	NIPSNAP3B	0.0382617	0.3378	0.2358	0.0264	0.1372
15	79177383	MORF4L1	0.0384849	0.7267	0.2998	0.005934	NA
3	52867393	TMEM110-MUSTN1	0.0385025	0.641	0.2033	0.06312	0.0354
19	49224107	RASIP1	0.0385971	0.6247	0.6352	0.1873	0.003932
5	111066697	NREP	0.0386136	0.06284	0.05573	0.2261	0.3693
14	39716201	MIA2	0.0386249	0.2987	0.5305	0.008187	0.2255
2	189599373	DIRC1	0.038652	0.09549	0.01624	0.3413	0.5533
19	35648365	FXYD5	0.03866	NA	NA	0.03866	NA
10	85901354	GHITM	0.03866	NA	NA	0.03866	NA
19	3531959	FZR1	0.0387511	NA	0.2073	0.7226	0.008711
16	31102589	VKORC1	0.0390714	0.01995	NA	0.3242	NA
11	124440362	OR8A1	0.0390857	0.03773	0.2458	0.05831	0.5505
9	139089436	LHX3	0.0390972	0.9745	0.2171	0.006242	NA
1	218475847	RRP15	0.039115	0.07743	0.5401	0.008909	0.7999
2	36583771	CRIM1	0.0391893	0.04814	0.4448	0.03114	0.4482
3	44488293	ZNF445	0.0392092	NA	0.3995	0.004787	0.6932
1	150248200	C1orf54	0.03921	NA	NA	0.03921	NA
1	39325136	RRAGC	0.03922	0.03922	NA	NA	NA
3	10146036	C3orf24	0.0392825	0.4336	0.1283	0.02389	NA
12	72667286	TRHDE	0.039543	0.001004	0.5844	0.5249	0.9833
5	41313840	PLCXD3	0.03957	NA	0.03957	NA	NA
2	159663599	DAPL1	0.039609	0.1407	0.2971	0.3505	0.02072
12	122092181	MORN3	0.0396425	0.419	0.4782	0.03866	0.03924
12	32735130	FGD4	0.0398834	0.8896	0.0036	0.3042	0.3148
17	56434857	RNF43	0.0399371	0.1839	0.9977	0.002377	0.7046
10	32320002	KIF5B	0.0399969	0.2318	0.2411	0.01082	0.5093
17	17250197	NT5M	0.0401332	0.8431	0.002831	0.5146	0.252
13	50080847	PHF11	0.04014	NA	NA	0.04014	NA
9	140063557	LRRC26	0.0401683	0.9637	0.01857	0.1538	0.1126
14	70839847	SYNJ2BP	0.040196	0.4058	NA	0.01649	NA
1	55014013	ACOT11	0.0401973	0.6542	0.03759	0.9493	0.01329
1	161126779	UFC1	0.0402136	0.1034	NA	0.06475	NA
22	39996558	CACNA1I	0.0404019	0.2983	0.02794	0.301	0.1246
11	47611672	C1QTNF4	0.04053	NA	NA	0.04053	NA
10	103368654	DPCD	0.04053	0.04053	NA	NA	NA
14	102814997	CINP	0.0406	NA	NA	0.0406	NA
3	50645081	CISH	0.0408022	NA	0.8977	0.4091	0.003809
14	34985658	EAPP	0.0408406	0.4663	0.8489	0.1141	0.007032
19	13065087	GADD45GIP1	0.0409309	0.1553	0.7009	0.5055	0.005791
18	9944924	VAPA	0.0410105	0.002608	0.9404	0.5743	NA
11	5221008	OR51V1	0.041067	0.1436	0.07514	0.9607	0.03089
6	41753915	PRICKLE4	0.041087	0.1089	0.01472	0.5888	0.3395
2	20885321	C2orf43	0.0411018	0.001798	0.6059	0.6197	0.4749
10	30728101	MAP3K8	0.0411187	0.06257	NA	0.1099	NA
1	156213921	PAQR6	0.0412236	0.01915	0.05386	0.5288	0.5904
13	36909607	SPG20	0.0413565	0.01161	0.06031	0.9728	0.475
3	66430811	LRIG1	0.0413892	0.02071	0.2139	0.2075	0.3524
5	1254510	TERT	0.0414327	0.9817	0.4298	0.001376	0.5588
17	9497560	WDR16	0.0414426	0.6919	0.0005764	0.8255	0.9858
20	34241281	RBM12	0.0416364	0.6784	0.007932	0.1044	0.5817
12	95656704	VEZT	0.0416394	0.1089	0.694	0.0808	0.05352
11	17408485	KCNJ11	0.0416812	0.4796	0.01678	0.1789	NA
10	119043266	PDZD8	0.0417839	0.4592	0.8963	0.0015	0.5321
19	49079224	SULT2B1	0.0418181	0.3055	0.3267	0.3215	0.01025
15	45426373	DUOX1	0.0418334	0.004649	0.4993	0.3222	0.44
2	127447837	GYPC	0.0418708	0.9114	NA	0.007711	NA
3	67053926	KBTBD8	0.0418987	0.4491	0.1136	0.1938	0.03336
10	13151189	OPTN	0.0421363	0.003893	0.8482	0.8759	0.115
1	162557419	UAP1	0.0423598	0.4664	0.008422	0.7961	0.1072
19	7810421	CD209	0.0423644	0.01454	NA	0.4902	NA
2	196545025	SLC39A10	0.04248	NA	NA	0.04248	NA
8	143782044	LY6K	0.0425209	0.3603	NA	0.01987	NA
12	3392277	TSPAN9	0.042699	0.2191	NA	0.03284	NA
1	100620728	LRRC39	0.042825	0.0046	0.5215	0.1743	0.8148
19	18391285	JUND	0.04285	NA	NA	0.04285	NA
9	32457189	DDX58	0.0429437	0.3732	0.0742	0.2741	0.04507
22	37462155	TMPRSS6	0.0430147	0.7845	0.6098	0.02205	0.03251
6	27277051	POM121L2	0.0431295	0.7291	0.3972	0.2393	0.004968
4	128608927	INTU	0.0431551	0.01024	0.9597	0.4618	0.07593
1	3389727	ARHGEF16	0.043185	0.7352	0.3567	0.01456	0.09034
7	16640454	ANKMY2	0.0432594	0.6896	0.008802	0.6829	0.08343
17	4873725	CAMTA2	0.0432842	0.0649	0.03969	0.9808	0.137
12	3724583	EFCAB4B	0.043354	0.2646	0.05697	0.03472	0.6629
15	93173517	FAM174B	0.043939	NA	0.04433	0.168	NA
17	34391721	CCL18	0.0439512	NA	0.003006	0.9523	0.5404
17	79478236	ACTG1	0.0440055	NA	0.1886	0.03956	NA
5	79616059	SPZ1	0.0440619	0.5248	0.9158	0.02295	0.03222
4	102117083	PPP3CA	0.0440628	0.07847	NA	0.09523	NA
12	6061559	VWF	0.0441957	0.7842	0.07547	0.02455	0.2457
19	50938483	MYBPC2	0.044324	0.4688	0.9847	0.02867	0.02709
3	69167851	LMOD3	0.0443717	0.5964	0.9454	0.4941	0.001289
8	22398155	PPP3CC	0.0444355	0.6607	0.2314	0.01027	NA
7	75890226	SRRM3	0.0445632	0.3457	0.2746	0.1493	0.0255
8	110587865	SYBU	0.0446045	0.532	0.006046	0.2395	0.4698
9	140349707	NELF	0.0446699	0.5461	0.09011	0.4659	0.01582
7	107399213	CBLL1	0.0446941	NA	0.6028	0.2032	0.01292
1	26570657	CEP85	0.0447022	0.1029	0.02136	0.6653	0.2483
11	44069719	ACCSL	0.0447279	0.132	0.0652	0.05209	0.8106
18	6958609	LAMA1	0.0447712	0.4782	0.01015	0.1086	0.6904
3	36871124	TRANK1	0.0448293	0.4779	0.01756	0.2099	0.207
1	247200759	ZNF670	0.04506	NA	NA	0.04506	NA
2	39487824	MAP4K3	0.0450607	0.516	0.02963	0.02818	0.8528
9	101498853	ANKS6	0.0451307	0.05606	0.9971	0.05665	0.1163
2	192922499	TMEFF2	0.0451609	NA	0.09573	0.08041	NA
17	79993919	DCXR	0.0453673	0.6797	0.001027	0.5431	0.979
19	57036362	ZNF471	0.0453693	0.01483	0.8547	0.05793	0.5055
3	38167080	ACAA1	0.0454026	0.07389	0.3351	0.1097	0.1368
3	50655190	MAPKAPK3	0.0454499	0.3013	0.1795	0.1607	0.04282
16	15761274	NDE1	0.04546	NA	NA	0.04546	NA
1	16091591	FBLIM1	0.0454924	NA	0.08523	0.1597	0.1191
1	38453330	SF3A3	0.04555	NA	NA	0.04555	NA
7	32598816	AVL9	0.0456732	0.05809	0.1781	0.05491	0.6599
1	95699811	RWDD3	0.0456878	NA	0.0163	0.4789	NA
9	131719316	NUP188	0.0457618	0.0249	0.04601	0.6722	0.4882
19	8651082	ADAMTS10	0.0457627	0.4694	0.2781	0.01504	0.1915
11	57175299	SLC43A3	0.0458651	NA	NA	0.01206	0.6503
9	130472880	C9orf117	0.0458931	0.4717	0.3013	0.04474	0.05938
5	42800866	SEPP1	0.0458933	0.7768	0.0009075	0.7236	0.7402
17	45774072	TBKBP1	0.0459821	0.3795	NA	0.8693	0.004986
6	39311554	KIF6	0.0461521	0.4478	0.485	0.007837	0.2237
11	113078035	NCAM1	0.0463168	0.5645	0.4157	0.05834	0.02796
17	39777840	JUP	0.046471	0.6397	0.009758	0.2117	0.2911
1	158224516	CD1A	0.0464875	0.01253	0.1487	0.2727	0.7575
19	282181	PPAP2C	0.0467043	0.922	0.421	0.02446	0.04082
21	37597876	DOPEY2	0.0467431	0.2368	0.2126	0.02715	0.2839
6	150157345	LRP11	0.046768	0.04519	0.3813	0.2083	0.1082
10	123503355	ATE1	0.0470856	NA	0.3677	0.0124	0.3726
15	85525556	PDE8A	0.0471169	0.262	0.0915	0.07093	NA
11	5246908	HBB	0.0471692	0.07224	NA	0.1123	NA
15	91475018	HDDC3	0.0471921	0.08927	NA	0.09093	NA
10	124175436	PLEKHA1	0.047242	0.4242	0.02241	0.05823	0.7122
4	4242132	TMEM128	0.0473259	0.004283	0.5973	0.6687	NA
6	2890726	SERPINB9	0.0473595	0.07425	0.01464	0.7414	0.491
21	35742799	KCNE2	0.0473773	0.01721	NA	0.4739	NA
1	93426938	FAM69A	0.04743	0.04743	NA	NA	NA
3	185146473	MAP3K13	0.0474832	0.4512	0.03043	0.03318	0.872
15	41795054	ITPKA	0.0475287	0.6611	0.0286	0.02963	0.7101
16	30364712	CD2BP2	0.0476253	NA	0.02871	0.1504	0.3996
6	135290443	HBS1L	0.0476521	0.6848	0.005523	0.1144	0.923
1	217604522	GPATCH2	0.0476526	0.7023	0.5729	0.005377	0.1846
8	85441663	RALYL	0.0479164	0.07828	0.05683	0.3911	NA
12	54686186	NFE2	0.0479295	NA	0.9643	0.008577	NA
20	825579	FAM110A	0.0479411	0.8016	0.00474	0.1828	0.5802
1	902088	PLEKHN1	0.0480011	0.003912	0.5384	0.6246	0.3069
19	10203363	ANGPTL6	0.0480059	0.4623	0.00418	0.3345	0.6247
9	35236570	UNC13B	0.0480425	0.7596	0.09351	0.01024	0.5558
4	122068316	TNIP3	0.0480729	0.07736	NA	0.1073	NA
19	48624555	LIG1	0.0480879	0.8072	0.001124	0.9991	0.4466
7	22985219	FAM126A	0.048122	NA	0.7758	0.003868	0.5832
6	28350388	ZSCAN12	0.0481931	0.8785	0.004136	0.2578	0.4336
13	25743748	FAM123A	0.048245	0.8601	0.09832	0.3821	0.01259
6	41126655	TREM2	0.0484269	0.03302	0.1156	0.122	0.8785
1	166890616	ILDR2	0.04847	NA	NA	0.04847	NA
5	1394856	SLC6A3	0.0486479	0.6156	0.03576	0.07216	0.2593
12	58335671	XRCC6BP1	0.0486506	0.2588	0.1255	0.01499	0.8461
9	75355093	TMC1	0.0486672	0.003363	0.7707	0.3347	0.4751
1	27190149	SFN	0.0486984	0.07319	NA	0.1152	NA
15	76452476	C15orf27	0.0487177	0.04173	0.08183	0.7269	0.1663
10	97816917	CCNJ	0.04872	NA	NA	0.04872	NA
10	71874048	AIFM2	0.0487305	0.6252	0.6295	0.07907	0.01327
11	67376033	NDUFV1	0.04877	0.3868	NA	0.7089	0.0065
3	99979872	TBC1D23	0.0487898	0.2695	0.279	0.3748	0.01468
19	41306650	EGLN2	0.0488445	0.01302	NA	0.1596	0.8595
1	57169794	PRKAA2	0.0488707	0.03499	NA	0.242	NA
16	334531	PDIA2	0.0491344	0.8333	0.2191	0.07356	0.03113
6	43483808	YIPF3	0.0492144	0.347	NA	0.02461	NA
1	54708960	SSBP3	0.0492303	NA	0.7881	0.01084	NA
3	57131722	IL17RD	0.0492706	0.112	0.01801	0.2356	0.8834
8	117950524	AARD	0.0494748	NA	0.1486	0.2834	0.04316
14	24785092	LTB4R	0.04948	NA	NA	0.04948	NA
1	53666438	CPT2	0.0495459	0.05041	0.8504	0.02516	0.3925
3	111846865	GCSAM	0.049683	0.922	0.008777	0.2259	NA
6	134491554	SGK1	0.0497197	NA	0.8977	0.949	0.002148
5	68487643	CENPH	0.0497314	0.084	0.03382	0.8109	0.1848
22	51183253	ACR	0.0498	0.0498	NA	NA	NA
6	32407773	HLA-DRA	0.0498633	0.3839	NA	0.0226	NA
5	16177949	2021-03-11	0.0499082	0.5651	NA	0.01537	NA
4	123814164	NUDT6	0.0499367	0.3489	0.2988	0.008326	0.4935
1	6293647	ICMT	0.0499961	0.003934	0.5762	0.4205	0.4502
10	76995442	COMTD1	0.0500557	NA	0.6748	0.01594	0.1717
1	17531763	PADI1	0.0501152	0.9207	0.02086	0.3168	0.07078
6	130505247	SAMD3	0.0501447	0.1916	0.4715	0.02332	0.2046
10	94594565	EXOC6	0.0501493	0.09164	0.05318	0.2076	0.4261
14	69992838	PLEKHD1	0.0501587	0.4097	0.6476	0.05973	0.02721
12	92537956	BTG1	0.05028	NA	NA	0.05028	NA
11	61108974	DAK	0.0504968	0.358	0.04156	0.1524	0.1921
6	26240711	HIST1H4F	0.0505042	0.1003	NA	0.08785	NA
6	30039034	RNF39	0.0505412	0.4028	0.03641	0.6821	0.0436
5	147692077	SPINK7	0.0505852	NA	0.2459	0.7369	0.01034
7	141137475	TMEM178B	0.05063	NA	NA	0.05063	NA
18	23612484	SS18	0.05068	NA	NA	0.05068	NA
1	40525111	CAP1	0.0507157	0.1914	NA	0.04627	NA
20	32369114	ZNF341	0.0508719	0.1528	0.1865	0.2523	0.06126
14	20691888	OR11H6	0.0509273	0.03866	0.544	0.5871	0.03573
21	36042189	CLIC6	0.0509436	0.008354	0.618	0.1228	0.6962
6	40998140	UNC5CL	0.0509477	0.4627	0.1523	0.009173	0.6829
4	83861100	LIN54	0.0510969	NA	0.3117	0.04206	0.1449
20	48124462	PTGIS	0.051233	0.1344	0.01769	0.3931	0.4763
5	72864078	UTP15	0.0512566	NA	0.636	0.1862	0.01611
9	32541880	TOPORS	0.0513128	0.1377	0.03587	0.1393	0.6485
6	28213239	ZKSCAN4	0.0513402	0.09412	0.08409	0.8768	0.06435
17	39871696	GAST	0.0514188	NA	0.09544	0.0231	0.8691
15	64980951	OAZ2	0.0514295	0.01019	0.1276	0.3872	0.8893
2	10186419	KLF11	0.0515635	0.02986	0.1667	0.5726	0.1577
1	19644218	PQLC2	0.051572	NA	0.08231	0.1098	NA
3	72799481	SHQ1	0.051572	0.2627	0.01487	0.7787	0.1478
16	21689879	OTOA	0.0516094	0.7578	0.02465	0.03735	0.6451
2	183594621	DNAJC10	0.0516099	0.01964	0.6566	0.06662	0.5239
9	124065263	GSN	0.0516306	0.7987	0.3266	0.003414	0.5057
1	35562965	ZMYM1	0.0516446	0.9346	0.2007	0.003203	0.7499
1	43638436	WDR65	0.051739	0.06243	0.7056	0.06801	0.1508
5	166711862	ODZ2	0.051778	0.1065	0.08444	0.4902	0.1026
19	44831989	ZFP112	0.0519531	0.9061	0.208	0.004163	0.5794
15	41277615	INO80	0.0520391	0.3846	0.2795	0.005951	0.7124
19	1555740	MEX3D	0.05206	0.05206	NA	NA	NA
6	168949888	SMOC2	0.0520713	0.168	0.4729	0.1718	0.03342
4	40245208	RHOH	0.05208	NA	NA	0.05208	NA
8	59728090	TOX	0.0521846	0.3294	NA	0.1674	0.03546
8	22458457	C8orf58	0.05222	0.08851	0.3002	0.01778	0.9697
4	54344855	LNX1	0.0522602	0.8269	0.003993	0.3208	0.433
16	67765383	RANBP10	0.0524781	NA	0.008687	0.2287	0.9918
15	38786861	RASGRP1	0.0526	NA	NA	0.0526	NA
17	27889643	ABHD15	0.0526047	0.04823	0.2379	NA	0.1723
8	192947	ZNF596	0.0526232	0.08501	0.6704	0.6693	0.01215
11	111946306	C11orf57	0.0527045	0.09395	0.819	0.02576	NA
3	46755747	PRSS50	0.0527606	NA	0.7935	0.003339	0.7492
8	22995385	TNFRSF10D	0.052819	0.003199	0.3072	0.6369	0.7446
19	33696362	LRP3	0.0528252	NA	0.778	0.03036	0.08418
11	45931647	PEX16	0.0529733	0.0986	NA	0.09469	NA
17	80393652	HEXDC	0.0529881	0.175	0.7419	0.061	0.05913
20	17930836	SNX5	0.0530299	0.1336	0.5726	0.02613	NA
9	3225104	RFX3	0.0530345	0.4282	0.0383	0.2901	0.09856
6	73951407	KHDC1	0.0530384	0.08724	0.4827	0.08117	0.1372
1	48231630	TRABD2B	0.0531481	0.9862	NA	0.009505	NA
13	80095078	NDFIP2	0.053174	0.01709	0.7677	0.2436	0.1473
12	105519873	KIAA1033	0.053195	0.297	0.2556	0.008462	0.7333
16	20422874	ACSM5	0.0531997	0.2678	0.1136	0.0329	0.4707
7	1024855	CYP2W1	0.0533145	0.4392	0.004807	0.2268	0.9871
6	139229872	REPS1	0.0534721	0.03039	0.605	0.05622	0.4593
1	113252841	PPM1J	0.0534915	0.1253	0.3119	0.03993	0.3044
3	192973579	HRASLS	0.0535297	0.5301	0.7904	0.7898	0.001437
8	51314904	SNTG1	0.0535905	0.05827	0.1516	0.07403	0.7284
17	79405446	BAHCC1	0.0536284	0.9428	0.03013	0.1367	0.1228
9	26842442	CAAP1	0.0536351	0.8922	0.5321	0.02355	0.04266
3	149484970	ANKUB1	0.0536826	0.06161	0.3527	0.08855	0.2482
11	73007871	P2RY6	0.0537449	0.1098	0.7252	0.02557	NA
17	15496727	CDRT1	0.05376	0.05376	NA	NA	NA
4	103184239	SLC39A8	0.0537777	NA	0.004492	0.661	0.6863
22	24106448	C22orf15	0.0537959	0.003767	0.9824	0.5509	NA
7	42004062	GLI3	0.0538512	0.7135	0.6238	0.09152	0.01178
14	36143784	RALGAPA1	0.0538663	0.6024	0.03718	0.03595	0.5962
6	13584370	SIRT5	0.0538697	0.01168	0.1972	0.8868	NA
7	99688952	COPS6	0.0538988	0.8879	0.002303	0.7597	0.3093
19	18557592	ELL	0.0539075	0.07526	0.8184	0.01739	0.4487
9	95608658	ZNF484	0.0539076	0.6818	0.4838	0.2606	0.005591
10	44871397	CXCL12	0.0539353	0.9187	0.007935	0.1064	0.6201
19	12918142	RNASEH2A	0.05397	NA	NA	0.05397	NA
22	39760275	SYNGR1	0.0540482	0.7912	0.2041	0.9239	0.003234
6	44223010	SLC35B2	0.0540951	0.5054	0.5997	0.05869	0.02716
21	30698748	BACH1	0.0541428	0.01728	0.5313	0.2077	0.2537
6	90642251	BACH2	0.0541799	0.9817	0.865	0.002294	0.2486
4	174090004	GALNT7	0.0541911	0.01197	0.7934	0.2145	0.2378
1	12711343	AADACL4	0.0541961	0.3131	0.2741	0.05718	0.09873
2	172926226	METAP1D	0.0541989	0.3963	0.003205	0.6661	0.5727
17	38027030	ZPBP2	0.054273	0.3552	0.03257	0.05031	0.8342
1	43239274	C1orf50	0.0543026	0.4805	0.7065	0.3926	0.003646
1	111663161	DRAM2	0.0544167	0.03996	NA	0.2414	NA
10	101544490	ABCC2	0.0544185	0.03508	0.3224	0.8084	0.05332
13	41508049	ELF1	0.0544875	0.9758	0.7141	0.02198	0.03189
1	48694594	SLC5A9	0.0544923	0.2241	0.7359	0.2506	0.01182
17	79164707	AZI1	0.0545611	0.2169	0.1623	0.2856	0.04868
17	19812541	AKAP10	0.05479	NA	NA	0.05479	NA
18	74082537	ZNF516	0.0548029	0.5986	0.01441	0.2176	0.2625
9	91652977	SHC3	0.0548676	0.3444	0.625	0.009035	0.2538
10	75574840	CAMK2G	0.0549505	NA	0.7345	0.01329	NA
3	9862274	ARPC4-TTLL3	0.0549833	0.01541	0.1308	0.4358	0.5637
10	135438901	FRG2B	0.055	0.055	NA	NA	NA
12	81503343	ACSS3	0.0550401	0.01742	0.3124	0.3866	NA
20	62340115	ZGPAT	0.0551474	0.8834	0.02316	0.3878	0.06269
6	122773119	SERINC1	0.0551565	0.01981	0.3591	0.6904	0.1013
3	184289152	EPHB3	0.055261	0.5356	0.02814	0.08648	0.3828
6	29079755	OR2J3	0.0553066	0.01048	NA	0.9628	0.2099
3	25635127	RARB	0.0553758	NA	0.2847	0.03461	NA
5	140579358	PCDHB11	0.0553966	0.1478	0.01145	0.8112	0.3648
5	98128948	RGMB	0.0555339	0.1725	NA	0.05732	NA
9	90497847	FAM75E1	0.0555656	0.05917	0.729	0.1086	0.1074
15	82563991	FAM154B	0.0555789	NA	0.103	0.06704	0.3088
22	39440149	APOBEC3F	0.0557044	0.1516	0.921	0.4167	0.00868
2	178481818	TTC30A	0.0557068	0.2798	NA	0.07444	0.1027
16	15131974	NTAN1	0.0557422	0.7376	0.3582	0.6646	0.002879
1	246730090	CNST	0.0558168	0.006772	0.2196	0.3474	0.9805
6	29454816	MAS1L	0.0558382	0.06837	0.149	0.6983	0.07125
7	23286529	GPNMB	0.0559175	0.8204	0.2978	0.5522	0.003765
3	42734587	HHATL	0.0559196	0.4521	0.07251	0.6591	0.02351
4	89649732	FAM13A	0.0559364	0.3598	0.7659	0.007949	0.232
1	159890163	TAGLN2	0.0559751	0.06852	NA	0.1457	NA
1	38079393	RSPO1	0.0559758	NA	0.01403	0.3038	0.5052
22	30038249	NF2	0.0560199	0.01185	NA	0.8433	NA
5	139202369	PSD2	0.0560622	0.3398	0.7175	0.003965	0.5275
17	7077122	ASGR1	0.05614	NA	NA	0.05614	NA
10	115350597	NRAP	0.0561713	0.6259	0.1095	0.1571	0.0475
20	39831407	ZHX3	0.0562002	0.5257	0.4401	0.007484	0.2956
13	50306528	KPNA3	0.0564091	NA	NA	0.01294	0.7788
9	133884747	LAMC3	0.0564185	0.04403	0.04084	0.2881	0.9938
6	83074734	TPBG	0.0564691	0.04051	0.05431	0.2421	0.9679
21	47717537	YBEY	0.0564779	NA	0.05402	0.9743	0.04142
3	101293089	PCNP	0.05648	NA	NA	0.05648	NA
10	126631562	ZRANB1	0.0565628	0.02345	0.5293	0.176	NA
10	77807027	C10orf11	0.056592	0.0989	NA	0.1023	NA
19	57174993	ZNF835	0.0566947	0.6977	0.5122	0.3614	0.004016
19	757241	C19orf21	0.0567133	0.7459	0.298	0.01316	0.1774
14	74318714	PTGR2	0.0567585	0.3583	0.3805	0.0161	NA
21	31914013	KRTAP19-6	0.05677	NA	NA	0.05677	NA
16	28877939	SH2B1	0.0568135	0.6935	0.07837	0.04044	NA
9	129854069	ANGPTL2	0.0568305	0.423	0.005199	0.3691	0.6413
12	10856672	CSDA	0.0568416	NA	0.08019	0.0592	0.4633
2	58387258	FANCL	0.0568728	0.1437	0.9058	0.01691	NA
2	54093956	PSME4	0.0569259	0.9366	0.005627	0.2066	0.4793
12	44238723	TMEM117	0.0569308	0.3935	0.3987	0.01285	0.2589
19	53050882	ZNF808	0.056942	0.1073	0.3689	0.1261	0.1046
3	157271129	C3orf55	0.0569735	0.7657	0.08597	0.8203	0.009677
9	130884753	PTGES2	0.0569749	0.03558	0.4942	0.04406	0.6745
1	155920126	ARHGEF2	0.05701	NA	NA	0.05701	NA
13	21205192	IFT88	0.0570477	0.3071	0.3208	0.04255	0.1249
9	132662722	FNBP1	0.0571493	0.1413	0.2153	0.436	0.03958
4	69337325	TMPRSS11E	0.0573387	NA	NA	0.7291	0.0141
3	12627260	RAF1	0.0575383	0.03918	NA	0.2635	NA
5	148388512	SH3TC2	0.0576508	0.3719	0.6235	0.006925	0.3313
7	16901606	AGR3	0.0577013	0.3722	0.689	0.003352	0.6197
18	43565399	PSTPIP2	0.0578378	0.4131	NA	0.02515	NA
6	74079024	OOEP	0.057888	0.2396	0.1267	0.1429	0.1234
6	36936606	MTCH1	0.0579	0.0579	NA	NA	NA
1	32713033	FAM167B	0.0579044	0.00202	0.9536	0.601	0.4626
16	15692836	KIAA0430	0.0581105	0.09171	0.1213	0.6849	0.07067
17	7454275	TNFSF12-TNFSF13	0.0581854	0.01852	NA	0.5651	NA
3	186915414	RTP1	0.0581955	0.6989	0.0622	0.07744	0.1603
17	46655230	HOXB4	0.0583251	0.4475	0.6186	0.012	0.163
5	140794346	PCDHGA10	0.0583858	0.2625	0.9795	0.1254	0.01682
3	127394820	ABTB1	0.0584727	0.7618	0.004703	0.3553	0.427
12	125497102	BRI3BP	0.05849	NA	NA	0.05849	NA
2	203653587	ICA1L	0.0586442	0.8366	0.05522	0.2962	0.0399
4	167658622	SPOCK3	0.0586589	0.1977	0.02811	0.1146	0.8576
4	189060803	TRIML1	0.0587096	NA	0.03739	0.1723	0.357
3	119316828	PLA1A	0.058711	NA	0.1816	0.6694	0.01892
20	49127119	PTPN1	0.0587512	0.1817	0.0985	0.366	0.08358
1	222919895	FAM177B	0.05882	NA	NA	0.05882	NA
5	74400324	ANKRD31	0.0588589	0.03022	0.2719	0.2018	0.3311
16	31765105	ZNF720	0.05896	NA	NA	0.05896	NA
4	156135155	NPY2R	0.0589798	NA	0.5343	0.05599	0.07737
4	154631526	RNF175	0.05911	0.05233	0.8337	0.07168	0.1767
11	1774810	CTSD	0.05936	NA	NA	NA	0.05936
22	51117580	SHANK3	0.0593709	0.3113	0.0118	0.4901	0.309
5	149740732	TCOF1	0.0594359	0.0313	0.9904	0.4575	0.03929
16	3100095	MMP25	0.0594434	0.04835	0.1587	0.1372	0.5294
1	149919225	OTUD7B	0.0594802	0.08545	0.03467	0.2275	0.8277
4	47427873	GABRB1	0.059553	NA	0.8333	0.7457	0.003775
11	64950331	CAPN1	0.0596515	0.1317	0.4411	0.07971	0.121
17	80789037	ZNF750	0.0597386	0.3536	0.09717	0.2108	0.07753
12	133586836	ZNF26	0.0598205	0.01946	NA	0.5563	NA
9	34179037	UBAP1	0.0598267	NA	0.05693	0.0917	0.4522
1	3786245	DFFB	0.0598512	0.2217	0.3445	0.0168	0.4389
19	14991881	OR7A17	0.0599	NA	0.0902	0.2742	0.09561
7	127222318	GCC1	0.059941	0.6992	0.01216	0.1503	0.4417
2	219319666	USP37	0.0600269	0.01044	0.4844	0.6854	0.1632
6	31583312	AIF1	0.06007	NA	NA	0.06007	NA
12	15130981	PDE6H	0.0601082	0.7995	0.01362	NA	NA
9	138457640	PAEP	0.0603551	NA	0.6989	0.004587	0.7454
3	186335056	AHSG	0.06036	0.8118	NA	0.005035	0.5847
11	55798145	OR5AS1	0.0604003	NA	0.8807	0.08417	0.03227
2	138727746	HNMT	0.06041	NA	NA	0.06041	NA
11	57365723	SERPING1	0.0604136	0.07485	0.04961	0.6444	NA
3	147109032	ZIC4	0.0605414	0.6971	0.03585	0.04627	0.4956
1	21053559	SH2D5	0.0607217	0.0133	0.1126	0.8037	0.4783
20	24944483	APMAP	0.0609438	0.5434	0.001639	0.8592	0.7565
22	31324124	MORC2	0.0609558	0.05454	NA	0.2031	NA
3	37536056	ITGA9	0.0610197	0.7378	0.04924	0.1886	0.08465
1	1361736	TMEM88B	0.0610409	0.207	0.8041	0.01023	0.3408
2	108489225	RGPD4	0.06108	0.06108	NA	NA	NA
7	55223639	EGFR	0.0610879	0.8675	0.8823	0.001591	0.4771
3	53908348	ACTR8	0.0611638	0.5839	NA	0.01905	NA
3	46963755	CCDC12	0.0612569	NA	0.1257	0.8951	0.02168
19	52877677	ZNF880	0.06127	NA	NA	0.06127	NA
3	124017713	KALRN	0.061322	0.4289	0.01416	0.9279	0.1037
5	176951914	FAM193B	0.0613582	0.5722	0.01936	0.9849	0.05361
3	111394179	PLCXD2	0.0613754	0.5469	0.3665	0.006946	0.4203
16	67709072	GFOD2	0.06147	NA	NA	0.06147	NA
6	116442897	AL121963.1	0.0615087	0.07522	0.2406	0.3072	0.1056
16	48395527	SIAH1	0.06162	0.06162	NA	NA	NA
2	73989915	DUSP11	0.06168	NA	NA	0.06168	NA
12	8800767	MFAP5	0.0617027	NA	NA	0.9385	0.01198
2	136872987	CXCR4	0.06171	NA	NA	0.06171	NA
10	5683731	ASB13	0.0617171	0.1156	0.5546	0.03516	0.2618
11	6422240	APBB1	0.0617439	0.7462	0.02415	0.03774	0.8683
4	85414579	NKX6-1	0.06189	NA	NA	0.06189	NA
11	70319533	SHANK2	0.0619692	0.6368	0.03565	0.07615	0.3435
10	60549037	BICC1	0.0619829	0.078	0.03815	0.9907	0.2015
14	21161784	ANG	0.0620145	0.6378	0.03552	0.02771	0.947
9	100961704	TBC1D2	0.0621419	0.1257	0.06674	0.1157	0.6144
14	79181481	NRXN3	0.0623182	0.2374	0.2847	0.3981	0.02226
1	209788656	LAMB3	0.0623891	0.6778	0.1091	0.008686	0.9341
21	43938572	SLC37A1	0.0625163	NA	0.03134	0.3507	0.2283
16	88889114	GALNS	0.062567	0.3549	0.07284	0.2043	0.1141
11	17118687	PIK3C2A	0.0625691	NA	0.5213	0.03599	0.1339
1	158979950	IFI16	0.0625776	0.5925	0.01532	0.3103	0.214
14	104029346	APOPT1	0.06266	NA	NA	0.06266	NA
14	74345884	RP5-1021I20.4	0.0626747	0.3583	0.3805	0.01847	NA
13	47127813	LRCH1	0.0626978	0.04464	0.1978	0.2095	0.3268
17	7245267	ACAP1	0.0627498	NA	0.06889	0.1666	NA
19	49977929	FLT3LG	0.0628235	NA	0.3603	NA	0.0319
12	6787612	ZNF384	0.0628244	NA	0.5006	0.02296	NA
16	3254408	OR1F1	0.0629063	0.9057	0.2002	0.5359	0.006253
16	29675114	SPN	0.0629734	NA	NA	0.04282	0.2692
3	49200627	CCDC71	0.063189	NA	0.6007	0.01927	NA
18	31538235	NOL4	0.06319	0.06319	NA	NA	NA
15	90809633	NGRN	0.0632763	0.07388	0.4139	0.03084	0.6501
8	43002207	HGSNAT	0.063334	0.04408	0.04096	0.8031	0.4234
1	36636854	MAP7D1	0.0633387	0.5255	0.09192	0.0143	0.8889
13	45589126	KIAA1704	0.0633722	0.03814	0.6224	0.08838	0.2929
7	44621720	TMED4	0.0633788	0.4925	NA	0.02359	NA
12	18891317	CAPZA3	0.063433	0.3361	0.009523	0.2499	0.7694
19	54695720	TSEN34	0.0635519	0.8299	0.00614	0.5993	0.2021
15	101464717	LRRK1	0.0636008	0.7937	0.2227	0.02001	0.1747
2	242255830	2021-09-02	0.0636255	0.1791	0.07848	0.7788	0.05648
8	142446139	AC100803.1	0.0636958	0.4663	0.1358	0.01846	0.5298
14	24788316	ADCY4	0.0637221	0.2786	0.03296	0.1803	0.3743
15	39544380	C15orf54	0.0637694	NA	0.1645	0.07116	NA
13	28794511	PAN3	0.0637854	0.942	0.01737	0.1853	0.2047
6	110533410	CDC40	0.0638333	NA	NA	0.04279	0.2739
14	93649713	MOAP1	0.0638349	0.5434	0.4837	0.004686	0.5045
19	51480829	KLK7	0.0638509	NA	0.01175	0.9978	NA
11	130750592	SNX19	0.0638758	0.02131	0.04915	0.8906	0.6668
19	1041971	ABCA7	0.0640086	0.6748	0.5143	0.05445	0.03302
6	105526501	LIN28B	0.0640748	NA	0.02927	0.1158	0.7661
5	112090657	APC	0.0640879	0.4518	0.46	0.005246	0.5734
1	1114668	TTLL10	0.0641784	0.01501	0.2899	0.217	0.6635
16	14738258	BFAR	0.06422	NA	NA	0.06422	NA
8	30469811	GTF2E2	0.0642774	0.04788	0.499	0.1819	0.1445
3	36422176	STAC	0.0643638	0.05441	NA	0.2176	NA
6	170102748	C6orf120	0.0644101	0.0194	0.6009	0.1016	0.5319
8	95746907	DPY19L4	0.0644543	0.217	0.7934	0.01866	0.1963
10	106074693	ITPRIP	0.0645346	0.01427	0.1303	0.3437	0.9887
11	46625172	HARBI1	0.0645832	0.8225	0.1877	0.05767	0.07105
5	137891772	HSPA9	0.0646135	0.09472	0.0678	0.9085	0.1085
14	58863051	TOMM20L	0.0646209	NA	0.3937	0.03022	NA
19	36526362	THAP8	0.064685	NA	0.6547	0.3742	0.01074
14	23882972	MYH7	0.0647527	0.44	NA	0.04582	0.1307
10	50822376	CHAT	0.0648474	0.1714	0.4862	0.03362	0.2272
10	95326676	O3FAR1	0.0648574	NA	0.05895	0.2041	0.2195
14	24769625	NOP9	0.0648591	0.004117	0.3976	0.4373	0.8895
14	37132525	PAX9	0.0648984	0.08164	NA	0.1465	NA
17	26691310	SEBOX	0.06504	NA	NA	0.06504	NA
4	86950379	MAPK10	0.06507	NA	NA	0.06507	NA
12	49491793	LMBR1L	0.0650981	0.6904	0.168	0.04503	0.1226
6	36334672	ETV7	0.0652391	0.7671	0.1115	0.5747	0.01307
2	207310170	ADAM23	0.0653525	0.4353	0.5535	0.594	0.004501
6	117010525	KPNA5	0.0653787	NA	0.003519	0.9659	0.7857
1	210273357	SYT14	0.0654351	0.1721	0.1369	0.0684	0.4005
22	29835060	RFPL1	0.0657276	0.03166	NA	0.3837	NA
1	16346533	CLCNKA	0.065765	0.9977	0.0513	0.03144	0.4042
17	56598656	2021-09-04	0.0657655	0.0477	0.184	0.1178	0.6291
16	85711861	GINS2	0.06593	NA	NA	0.06593	NA
1	153507176	S100A6	0.0659745	NA	0.8615	0.3287	0.009551
6	36063793	MAPK14	0.0659795	0.01312	0.8504	0.1076	0.5445
16	10626763	EMP2	0.0659901	0.6916	0.771	0.006589	0.1861
19	36365736	APLP1	0.066119	0.4722	0.9588	0.003741	0.3872
3	8661592	C3orf32	0.0661669	0.1085	0.02166	0.4132	0.6761
19	2039727	MKNK2	0.066288	0.1872	0.9582	0.01366	0.2687
11	88911122	TYR	0.0663196	0.4153	0.9161	0.8603	0.002013
5	146658874	STK32A	0.0663841	NA	NA	0.9022	0.01363
20	55750060	BMP7	0.0663925	0.6025	0.2326	0.01947	NA
7	123267310	ASB15	0.0664041	0.6769	0.6235	0.1683	0.009294
6	49753726	PGK2	0.0664747	NA	0.01125	0.2551	0.9524
4	187509931	FAT1	0.0664792	0.2755	0.05836	0.07558	0.5442
6	121767998	GJA1	0.0664936	0.9341	0.4183	0.006998	NA
16	3367229	ZNF75A	0.06653	NA	NA	0.06653	NA
10	293358	AL589988.1	0.0665311	NA	NA	0.03526	0.3497
10	293358	ZMYND11	0.0665311	NA	NA	0.03526	0.3497
13	111268063	CARKD	0.0665364	0.3881	0.3949	0.5957	0.007253
1	20979136	DDOST	0.066555	0.1647	0.04271	0.144	0.654
13	78320801	SLAIN1	0.06657	0.04678	0.4096	0.2581	0.134
1	67220450	TCTEX1D1	0.06658	NA	NA	0.06658	NA
15	70959422	UACA	0.0666745	0.6791	0.3115	0.0117	0.2684
1	33065947	ZBTB8OS	0.0668271	0.1951	0.06524	0.903	0.058
12	235022	IQSEC3	0.066863	0.1304	0.2342	0.09023	NA
1	86891073	CLCA2	0.0668818	0.07939	0.1596	0.3218	0.1637
11	118895670	TRAPPC4	0.066945	0.3084	0.1187	0.05388	0.3389
7	30701812	CRHR2	0.0669578	0.4579	0.329	0.1215	0.03653
11	56113516	OR8K1	0.0670257	0.9964	0.3297	0.003921	0.5199
2	55054839	EML6	0.0670784	0.7945	0.2814	0.01998	0.1501
15	72690680	TMEM202	0.0671199	0.1135	0.08195	0.09837	0.7335
18	29848028	FAM59A	0.0671238	0.1322	0.3324	0.383	0.03988
11	65365830	MAP3K11	0.0672496	0.02209	0.4947	0.2542	NA
21	38437951	PIGP	0.0673014	NA	0.3732	0.03885	0.1918
14	23816670	SLC22A17	0.0673247	NA	0.1117	0.7991	0.03117
20	30789888	PLAGL2	0.0673602	0.01017	0.6213	0.196	0.5449
19	3148645	GNA15	0.0675407	NA	NA	0.3116	0.04031
1	36752433	THRAP3	0.0677376	0.1349	0.1732	0.1201	NA
5	68715310	MARVELD2	0.067758	0.473	0.005303	0.3068	0.8849
8	42977980	SGK196	0.0678642	0.03543	0.5792	0.1371	NA
16	70590898	SF3B3	0.0678802	0.6113	0.04362	0.07541	0.3396
12	121221518	SPPL3	0.0679463	0.3042	0.01375	0.7914	0.2066
17	42018835	PPY	0.0679594	NA	0.2658	0.02091	0.5072
11	210660	RIC8A	0.067987	0.3655	0.06245	0.0483	0.6209
12	51749641	GALNT6	0.0680197	0.03602	0.4134	0.7533	0.06107
13	25876011	NUPL1	0.0681052	0.9713	0.3707	0.03907	0.04879
3	31725213	OSBPL10	0.0681364	0.02366	0.04691	0.9422	0.6568
1	23110905	EPHB2	0.0681624	0.3893	0.05774	0.1055	0.2898
1	93965129	FNBP1L	0.0681859	0.004965	0.8588	0.6642	NA
2	74756499	AUP1	0.0683195	0.04998	0.04054	0.977	0.3484
9	95228663	ASPN	0.0686649	NA	0.3188	0.05852	0.1533
10	98741973	C10orf12	0.0687882	0.6172	0.1827	0.006241	0.9904
5	54579230	DHX29	0.0688225	0.8538	0.148	0.009194	0.6004
16	10837728	NUBP1	0.0688231	NA	NA	0.02762	0.4654
8	98863677	LAPTM4B	0.0688981	0.5764	0.3956	0.01744	0.1757
12	133291473	PGAM5	0.06895	NA	NA	0.06895	NA
19	13010874	SYCE2	0.0689594	0.3428	0.6578	0.0102	0.3042
4	55127448	PDGFRA	0.0689773	0.2632	0.7449	0.005117	0.6977
16	2762637	PRSS27	0.0690696	0.9798	0.7453	0.003813	0.2519
8	139601612	COL22A1	0.0691149	0.8805	0.02945	0.8634	0.03136
18	13008497	CEP192	0.0691234	0.003913	0.632	0.3599	0.789
17	37093490	FBXO47	0.0691863	0.7676	0.1084	0.01001	0.8443
3	58512237	ACOX2	0.0692512	0.03516	0.3332	0.151	0.3981
12	80613641	OTOGL	0.0693003	0.01397	0.7809	0.3116	0.2074
11	9007342	NRIP3	0.0693174	0.5951	0.07457	0.04093	0.3883
19	9267319	ZNF317	0.0693386	0.372	0.4154	0.0126	0.3624
11	117042377	PAFAH1B2	0.0693401	NA	NA	0.114	0.1138
11	120198093	TMEM136	0.0693792	0.3957	0.04261	0.1721	NA
13	41373319	SLC25A15	0.0694302	0.7205	0.3486	0.00299	0.9415
17	1648294	SERPINF2	0.0694425	0.5336	0.1652	0.03296	NA
6	105563677	BVES	0.0694496	0.4039	0.04112	0.5624	0.07573
17	34247202	RDM1	0.0695	NA	NA	0.0695	NA
18	77170477	NFATC1	0.0695023	0.09755	0.01987	0.3952	0.9245
15	78755281	IREB2	0.0696126	0.3245	0.1217	0.1871	0.09608
7	106685640	PRKAR2B	0.06976	0.06976	NA	NA	NA
12	66546100	TMBIM4	0.0699508	0.8658	0.8093	0.9365	0.00109
12	124156614	TCTN2	0.0701191	0.042	0.1474	0.3215	0.3607
16	1412267	GNPTG	0.0701284	0.292	NA	0.2529	0.03989
1	28661074	MED18	0.070263	NA	0.1189	0.1109	NA
14	73706541	PAPLN	0.0702687	0.05295	0.902	0.02743	0.5498
7	100806341	VGF	0.0703266	NA	0.07688	0.05465	0.7039
16	24950845	ARHGAP17	0.0703515	0.4723	0.1161	0.01388	0.9481
12	85255476	SLC6A15	0.0703554	0.6798	0.006569	0.7413	0.218
2	237997288	COPS8	0.07037	NA	NA	0.07037	NA
17	47075135	IGF2BP1	0.0704516	NA	NA	0.4404	0.03004
4	187192895	F11	0.0705334	0.04943	0.1136	0.2288	0.5639
7	30791847	INMT-FAM188B	0.0705782	0.5188	0.8534	0.01598	0.1025
4	184585165	TRAPPC11	0.0706167	0.02074	0.9751	0.0526	0.6823
1	35222995	GJB5	0.0706367	0.4759	0.03031	0.3254	0.1547
7	138711291	ZC3HAV1L	0.07065	NA	NA	0.07065	NA
17	73987590	TEN1	0.07067	0.07067	NA	NA	NA
2	54844790	SPTBN1	0.0706877	0.5226	0.5768	0.003725	0.6474
7	100054475	C7orf61	0.0708073	NA	NA	0.2491	0.05344
19	5692192	LONP1	0.0708344	0.6239	0.1136	0.02077	0.4954
1	158516967	OR6Y1	0.0708352	0.3107	0.332	0.9012	0.007845
5	10227711	FAM173B	0.0708702	0.04137	0.3124	0.2748	0.2055
11	62559351	TMEM223	0.0709416	0.9083	0.243	0.007306	0.4533
4	106604070	INTS12	0.0709422	0.238	0.02085	0.6226	0.2366
12	6939850	LEPREL2	0.0709659	0.6247	0.5041	0.02467	0.09414
2	25467083	DNMT3A	0.0710083	0.02421	0.2958	0.4186	NA
2	45169352	SIX3	0.0710386	0.03361	0.7181	0.03532	0.8593
19	58867567	ZNF497	0.0710914	NA	0.8424	0.5231	0.006814
8	6913014	DEFA5	0.07112	0.07112	NA	NA	NA
1	150550761	MCL1	0.0711307	0.01517	0.2236	0.8859	NA
2	10904524	ATP6V1C2	0.0714971	0.5037	0.2323	0.1613	0.0392
1	206665837	C1orf147	0.07153	0.07153	NA	NA	NA
2	175301065	GPR155	0.07168	NA	NA	0.07168	NA
5	133534797	PPP2CA	0.07178	NA	NA	0.07178	NA
17	12819243	ARHGAP44	0.07186	NA	NA	0.07186	NA
7	38765883	VPS41	0.0720436	0.17	0.0187	0.539	0.4369
22	36886060	FOXRED2	0.0720822	0.408	0.165	0.01334	0.8343
9	116930100	COL27A1	0.0720931	0.01409	0.8062	0.153	0.4312
3	167183414	SERPINI2	0.0722175	0.7943	0.3385	0.1251	0.02234
2	54342846	ACYP2	0.0722309	0.03874	0.5978	0.6574	0.04937
5	156770117	FNDC9	0.0722536	0.3746	0.7088	0.04366	0.06487
2	16082465	MYCN	0.0723312	NA	NA	0.01416	0.9651
10	75671356	PLAU	0.0723575	0.2061	0.01708	0.3178	0.6737
3	37034021	EPM2AIP1	0.0723766	NA	0.02333	0.2526	0.5225
12	50821551	LARP4	0.0725862	NA	NA	0.1375	0.09982
5	125801239	GRAMD3	0.0726408	0.2648	0.301	0.7941	0.01198
7	23227652	NUPL2	0.0726636	0.04533	0.5906	0.7343	0.03859
15	29346151	APBA2	0.0728691	0.01569	0.2523	0.7853	NA
7	27195857	HOXA7	0.073001	0.4435	0.4822	0.01189	0.3005
11	130058437	ST14	0.0730391	0.9997	0.01393	0.3234	0.1698
9	139840215	C8G	0.0731341	0.7981	0.01684	0.1119	0.5095
12	48501161	PFKM	0.0731564	0.3415	0.03663	0.6551	0.09355
3	50355730	HYAL2	0.07316	NA	0.07316	NA	NA
12	122326812	PSMD9	0.0733501	0.007029	0.4036	0.3423	0.7927
11	57479507	MED19	0.0734832	0.02317	0.8117	0.9009	0.04556
8	29994790	LEPROTL1	0.07358	NA	NA	0.07358	NA
7	142124170	TRBV6-8	0.07358	0.07358	NA	NA	NA
20	62119777	EEF1A2	0.0737545	0.02368	0.06779	0.6617	0.7309
12	120106129	PRKAB1	0.0737887	0.08702	0.5661	0.02679	0.5887
10	116008464	VWA2	0.0738209	0.1515	0.9221	0.03998	0.1392
19	46124517	EML2	0.0738387	0.5592	0.2115	0.1651	0.03983
17	4047062	CYB5D2	0.073932	0.9338	0.04925	0.2927	0.05789
5	68550456	CDK7	0.07399	NA	NA	0.07399	NA
1	173472465	SLC9C2	0.0741235	0.3324	0.2124	0.03346	0.3312
13	39613430	NHLRC3	0.0741636	0.3453	0.1695	0.01638	0.8168
15	75632170	COMMD4	0.0743	NA	NA	0.0743	NA
1	26774050	DHDDS	0.0743	NA	NA	0.0743	NA
3	42445617	LYZL4	0.0743108	0.496	0.3351	0.01004	0.4707
2	183387015	PDE1A	0.0743451	0.3718	0.1358	0.01875	0.8303
4	66189849	EPHA5	0.0743904	0.2257	0.8206	0.01728	NA
16	88876158	APRT	0.0744854	0.3637	NA	0.03896	NA
8	104312381	FZD6	0.0747467	0.003753	0.9964	0.6238	0.3398
2	37443294	CEBPZ	0.074868	0.3065	0.6804	0.1007	0.03784
12	104373710	TDG	0.0749949	0.1398	0.537	0.04312	NA
10	135369532	SYCE1	0.0750566	0.1529	0.07557	0.07216	0.9568
8	120079545	COLEC10	0.0751219	0.2825	0.03284	0.2091	0.4118
10	45430394	TMEM72	0.0751498	NA	0.2137	0.7759	0.01958
19	56002383	SSC5D	0.0751582	0.4792	0.03998	0.1949	0.2141
15	36937461	C15orf41	0.0752128	0.07343	NA	0.1953	NA
2	242501804	BOK	0.0752393	0.0938	0.447	0.02737	0.6978
2	242648673	ING5	0.0752584	NA	0.02617	0.5484	NA
2	191114381	HIBCH	0.07538	NA	NA	0.07538	NA
17	72578429	CD300LD	0.0754167	NA	0.2631	0.05469	NA
19	572671	BSG	0.0757353	NA	0.5371	0.02693	NA
1	41512115	SCMH1	0.0757747	0.4972	0.6914	0.008976	0.2624
1	15860803	DNAJC16	0.0758629	0.3263	NA	0.04442	NA
1	16385131	FAM131C	0.0759193	0.4994	NA	0.02905	NA
12	6933223	GPR162	0.0759576	0.02937	0.3266	0.3436	NA
19	1000440	GRIN3B	0.0760229	0.01814	0.5848	0.8606	0.08914
1	155734742	GON4L	0.0761111	0.5709	0.06296	0.02534	0.8951
1	4772034	AJAP1	0.0761257	0.2855	0.1214	0.09539	NA
13	48807577	ITM2B	0.076228	0.04642	NA	0.3141	NA
6	46827239	GPR116	0.0763098	0.4761	0.01537	0.325	0.3442
1	173155860	TNFSF4	0.0765184	NA	0.07181	0.204	NA
7	72727156	TRIM50	0.076585	0.2317	0.08818	0.1632	NA
2	234181677	ATG16L1	0.0766122	NA	0.2243	0.06541	NA
22	50962167	SCO2	0.0766296	0.2567	0.03809	0.3413	NA
7	121942849	FEZF1	0.0767433	0.904	0.3351	0.004267	0.6389
7	5642987	FSCN1	0.076755	0.4069	0.5626	0.9312	0.003875
16	4847824	ROGDI	0.0767682	0.02791	0.05552	0.8645	0.6168
17	3101141	OR1A2	0.0768031	0.2864	0.3237	0.408	0.02186
5	73932199	ENC1	0.0769303	NA	0.9103	0.0162	NA
14	50092471	DNAAF2	0.0769367	0.1421	0.2464	0.05808	0.4077
19	54818721	LILRA5	0.0770339	NA	NA	0.4076	0.03624
1	91403431	ZNF644	0.0771526	0.002999	0.7393	0.6355	0.591
11	64940257	SPDYC	0.0771732	0.0106	0.5024	0.406	0.3853
21	33949136	TCP10L	0.07719	NA	NA	0.07719	NA
2	233345496	ECEL1	0.07721	0.1287	0.03342	0.3625	0.5347
11	63231022	HRASLS5	0.0773748	0.2967	0.1686	0.03688	0.4534
4	115858597	NDST4	0.0774003	0.272	0.07434	0.1618	0.2558
1	118165691	FAM46C	0.077409	0.756	0.1864	0.01101	0.5395
7	143632833	OR2F2	0.0776302	NA	0.3041	0.04904	NA
17	1451591	PITPNA	0.0776315	0.9929	NA	0.01502	NA
16	31470886	ARMC5	0.0777471	0.2283	0.2534	0.1018	0.1431
11	94760037	KDM4E	0.077758	0.2369	0.8957	0.02252	0.1764
3	97664666	MINA	0.0778495	0.2295	0.01032	0.7622	0.4678
6	39835372	DAAM2	0.0779742	0.7442	0.431	0.1063	0.02483
19	17547292	TMEM221	0.0779892	0.01946	0.2531	0.643	0.2674
13	48619855	NUDT15	0.0780025	NA	0.09485	0.1153	0.3129
1	114362278	PTPN22	0.0781081	0.5455	0.03145	0.09497	0.521
14	20443751	OR4K15	0.0782023	NA	NA	0.04279	0.3517
2	176981933	HOXD10	0.0782552	NA	0.01363	0.7484	0.337
11	8060566	TUB	0.0782863	0.08536	0.6358	0.3601	0.04359
1	228879176	RHOU	0.0784	NA	NA	0.0784	NA
7	77423450	TMEM60	0.0784232	NA	0.02269	0.4233	0.359
14	24805463	RIPK3	0.0785904	0.384	0.1371	0.4536	0.03589
16	48577065	N4BP1	0.0786094	0.6568	0.7977	0.09888	0.01655
17	73826167	UNC13D	0.0786216	0.0999	0.7513	0.1429	0.07996
10	43971579	ZNF487P	0.07864	0.07864	NA	NA	NA
15	30927362	ARHGAP11B	0.0787763	NA	0.2045	0.07426	NA
11	47376831	SPI1	0.07886	NA	NA	0.07886	NA
1	207263829	C4BPB	0.0791022	0.3111	0.2648	0.04237	NA
17	27233221	PHF12	0.07918	NA	NA	0.07918	NA
3	50334462	NAT6	0.0791882	0.9127	0.358	0.004081	0.6504
6	13316805	TBC1D7	0.0793121	0.8936	0.9684	0.03839	0.02617
11	102076653	YAP1	0.0794099	NA	0.6151	0.5753	0.009918
2	68358552	WDR92	0.07941	NA	NA	0.07941	NA
1	178834155	ANGPTL1	0.0794221	0.6388	0.7047	0.008907	0.2173
5	139815809	ANKHD1	0.0794242	0.6913	0.01181	0.3203	0.3332
5	139815809	ANKHD1-EIF4EBP3	0.0794242	0.6913	0.01181	0.3203	0.3332
1	7869953	PER3	0.0794261	0.4311	0.5125	0.1442	0.02735
11	67800484	NDUFS8	0.0794418	0.008425	0.5691	0.1936	0.939
22	25750578	LRP5L	0.0794422	0.1044	0.2763	0.774	0.03904
6	107475829	PDSS2	0.0794661	NA	0.6286	0.0264	0.2117
10	27306492	ANKRD26	0.0795047	0.6716	0.02199	0.2863	0.2064
11	68131259	LRP5	0.0797241	0.2234	0.0235	0.2874	0.5809
7	134260234	AKR1B15	0.0798022	0.1895	NA	0.6137	0.03039
5	24509749	CDH10	0.0798638	0.0193	0.4497	0.1766	0.5734
2	178528608	PDE11A	0.0798639	0.001883	0.9164	0.665	0.7659
3	31674551	STT3B	0.0799612	NA	0.9514	0.01626	NA
10	14950749	DCLRE1C	0.0799862	0.5595	NA	0.02766	NA
16	2025253	TBL3	0.0800017	0.004394	0.4651	0.8745	0.4931
1	42870265	RIMKLA	0.08001	NA	NA	0.08001	NA
5	139661097	PFDN1	0.0800296	NA	0.01179	0.3302	0.9115
17	18181592	TOP3A	0.0801261	0.04506	0.184	0.2818	0.3781
10	99218456	MMS19	0.0802701	0.1336	0.9505	0.0924	0.0755
4	41631718	LIMCH1	0.0803015	0.5511	0.01007	0.2468	0.6472
6	26087686	HFE	0.0803377	0.9855	0.7191	0.02516	0.04975
19	51981946	CEACAM18	0.0803489	0.004216	0.8275	0.6675	0.381
5	74842932	POLK	0.0803832	0.0241	0.1446	0.348	0.7321
22	26884039	SRRD	0.0805279	0.01963	NA	0.795	NA
17	35295653	LHX1	0.0806265	0.2343	0.07278	0.2103	NA
3	46935398	PTH1R	0.0806737	0.08664	0.1161	0.6674	0.133
14	62229285	SNAPC1	0.080722	0.9761	0.2894	0.08154	0.0388
9	6250546	IL33	0.0808474	0.01229	0.1953	0.405	0.9216
7	103767338	ORC5	0.0808489	0.7414	0.09274	0.03438	0.379
8	16921605	EFHA2	0.0809596	NA	0.2002	0.07847	NA
17	42475557	GPATCH8	0.0810315	0.1357	0.8444	0.05514	0.1423
4	152498875	FAM160A1	0.0810349	0.6425	0.03947	0.05715	0.6204
10	51027411	PARG	0.08105	NA	NA	0.08105	NA
19	58199291	ZNF551	0.0811161	0.01633	0.1122	0.6593	0.7455
6	16143390	MYLIP	0.0814465	0.2358	0.5427	0.103	0.06876
17	15611546	AC005324.8-001	0.0814697	0.6846	0.9862	0.1331	0.01009
17	15611546	ZNF286A	0.0814697	0.6846	0.9862	0.1331	0.01009
16	25228368	AQP8	0.0816897	NA	0.05778	0.1219	0.5187
14	90429595	TDP1	0.0817471	0.5552	0.1585	0.1466	0.07066
15	50867089	TRPM7	0.0818635	0.2146	0.01276	0.4519	0.7383
12	110841379	ANAPC7	0.0818871	0.04233	0.9876	0.2004	0.1091
10	119001253	SLC18A2	0.0818892	NA	NA	0.3164	0.05036
1	155039441	EFNA4	0.0819599	0.03402	0.4453	0.07742	0.7804
8	21964944	NUDT18	0.0820028	0.08249	0.0369	0.4953	0.6076
3	14860707	FGD5	0.0820782	0.06199	0.2898	0.5246	0.09734
2	29074121	TRMT61B	0.0821212	0.9816	0.02504	0.1175	0.3179
17	32953316	TMEM132E	0.0822087	NA	0.005284	0.7199	0.9691
6	136683828	MAP7	0.0822406	0.1061	0.7345	0.2831	0.04171
3	20017598	RAB5A	0.08226	NA	NA	0.08226	NA
3	129177462	IFT122	0.0824104	0.2662	0.5883	0.006167	0.9559
2	11284184	C2orf50	0.0824882	0.8175	0.2001	0.02582	0.2189
2	131100734	IMP4	0.0825411	0.07528	0.7566	0.05081	0.3198
12	21602576	PYROXD1	0.0826923	NA	0.122	0.8796	0.03464
8	17396380	SLC7A2	0.0827041	0.07531	0.4164	0.05367	0.5516
7	92027537	ANKIB1	0.0827043	0.5712	0.04799	0.2846	0.119
14	75329318	PROX2	0.0828526	0.3331	0.04447	0.6796	0.09248
9	104184181	ALDOB	0.0828635	0.01057	0.4899	0.4181	0.4301
22	50964207	TYMP	0.082866	0.133	0.2854	0.2041	0.1202
2	137639841	THSD7B	0.0829138	0.09687	0.07585	0.501	0.2532
7	27872466	JAZF1	0.0830395	0.4418	0.06804	0.1244	NA
15	52254612	LEO1	0.0832183	NA	0.03514	0.4626	NA
2	37458898	C2orf56	0.0832872	0.1415	NA	0.115	NA
10	43595928	RET	0.0833216	0.08962	0.7412	0.03855	0.3668
1	113098534	ST7L	0.0834771	0.008303	0.6195	0.5062	0.3618
22	45122490	ARHGAP8	0.083538	0.5314	0.1986	0.05332	0.1676
22	45122490	PRR5-ARHGAP8	0.083538	0.5314	0.1986	0.05332	0.1676
2	157352676	GPD2	0.0835517	0.2892	0.2148	0.02215	0.6856
8	120847188	DSCC1	0.0835644	0.05451	0.2511	0.06934	0.9942
16	67697180	C16orf48	0.0836035	0.006339	0.4101	0.7825	0.4642
2	209106854	IDH1	0.08361	NA	NA	0.08361	NA
14	78146252	ALKBH1	0.0836546	0.02081	0.7834	0.2318	NA
19	48032241	ZNF541	0.0839577	0.604	0.03768	0.1669	NA
12	51068409	DIP2B	0.0841291	0.9618	0.935	0.2469	0.004295
11	93469413	TAF1D	0.0841753	0.6464	0.6392	0.01564	0.1477
12	123461303	OGFOD2	0.0841901	0.5002	0.1944	0.1297	0.0757
20	24938082	CST7	0.0844026	NA	0.3366	0.04915	NA
2	38523699	ATL2	0.0844181	0.01456	0.6081	0.1153	0.9392
4	96761363	PDHA2	0.0844518	0.6954	0.556	0.5915	0.004195
6	3456430	SLC22A23	0.0846388	0.9678	0.8134	0.04888	0.02502
3	148583153	CPA3	0.0847346	0.2059	0.3704	0.1464	0.08638
4	7062894	GRPEL1	0.08482	NA	NA	0.08482	NA
22	32330282	C22orf24	0.0849	NA	NA	0.0849	NA
7	138732457	ZC3HAV1	0.084959	0.9804	0.5414	0.1609	0.01134
17	46022065	PNPO	0.0851288	NA	NA	0.9959	0.01679
9	115931593	FKBP15	0.0852414	0.7058	0.009	0.1942	0.7892
22	38259334	EIF3L	0.08525	NA	NA	0.08525	NA
11	85347173	TMEM126B	0.0852837	0.117	0.481	0.9581	0.01807
19	54496329	CACNG6	0.0852851	0.3266	NA	0.01552	0.7663
3	52179931	POC1A	0.0853065	0.1563	0.8565	0.02459	0.2961
12	81112786	MYF5	0.0853409	0.3405	NA	0.04926	NA
15	64962630	ZNF609	0.0853674	0.0505	0.4222	0.5689	0.08045
5	175992370	CDHR2	0.085594	0.9206	0.007386	0.1803	0.7993
1	242253166	PLD5	0.0856537	0.1089	0.32	0.03521	0.7995
5	177546780	N4BP3	0.0856837	0.2598	0.1466	0.3432	0.07509
17	7454275	TNFSF12	0.0857067	0.02984	NA	0.5651	NA
17	74381555	SPHK1	0.0857399	0.9471	0.4836	0.08671	0.02474
20	33442648	GGT7	0.0857414	0.3965	NA	0.04255	NA
3	53220309	PRKCD	0.0857627	0.05607	0.7103	0.1992	0.1239
19	5208046	PTPRS	0.0859777	0.1937	0.8139	0.3369	0.01858
11	1856344	SYT8	0.0860481	0.5142	0.6766	0.0712	0.03989
17	18148534	FLII	0.0861267	0.008486	0.5873	0.9154	0.2169
7	150500527	TMEM176A	0.0861353	0.5443	0.0183	0.5694	0.1745
16	320583	RGS11	0.0862297	0.2262	0.1374	0.1035	0.3082
12	58156947	CYP27B1	0.0863593	0.1105	0.317	0.1311	0.2164
18	12262897	CIDEA	0.0863763	0.5875	0.1124	0.09063	0.1661
1	110033668	ATXN7L2	0.0863849	0.02923	0.7473	0.1811	NA
5	74981103	POC5	0.0864208	0.3385	0.02132	0.2991	0.4609
1	114438448	AP4B1	0.086449	0.1493	0.3947	0.8082	0.0209
3	47539870	ELP6	0.08656	0.3877	0.01888	0.542	NA
19	18285944	IFI30	0.0865675	0.05495	0.9587	0.07116	0.2661
7	119915432	KCND2	0.0865962	NA	0.4163	0.04103	NA
16	69381705	RP11-343C2.7	0.0865973	0.5671	NA	0.03012	NA
17	915979	ABR	0.08665	NA	NA	0.08665	NA
2	210887737	KANSL1L	0.0867451	0.2053	0.005972	0.8508	0.9594
12	5603600	NTF3	0.0868207	0.9259	0.1722	0.488	0.01288
8	7215821	ZNF705G	0.08688	0.08688	NA	NA	NA
8	97256207	MTERFD1	0.0869027	0.2907	0.02552	0.5378	NA
3	52740182	SPCS1	0.0869138	0.4047	0.1292	0.02647	0.7253
7	134216757	AKR1B10	0.0869189	0.5276	0.2247	0.1176	0.07201
12	57884053	MARS	0.0871449	0.09098	0.6887	0.1308	0.123
8	27950736	ELP3	0.0872581	NA	NA	0.8088	0.02132
17	48148852	ITGA3	0.0873335	0.1519	0.07819	0.1919	0.4438
1	110200294	GSTM4	0.08737	0.08737	NA	NA	NA
10	70748784	KIAA1279	0.0874071	0.2196	NA	0.07869	NA
6	31556922	NCR3	0.0874845	0.4043	0.1155	0.7197	0.03018
15	42120342	JMJD7	0.0874899	0.336	0.2447	0.1257	0.09815
3	45869972	LZTFL1	0.0875857	NA	NA	0.03901	0.4441
11	96124337	JRKL	0.08763	NA	NA	0.08763	NA
6	7182155	RREB1	0.0877736	0.1378	0.7425	0.2061	0.04835
14	100615586	DEGS2	0.0879238	0.06563	0.9204	0.02269	0.7459
1	54269633	TMEM48	0.0880245	0.9051	0.9346	0.009393	0.1289
12	96640857	ELK3	0.0880629	0.3596	0.1641	0.8893	0.01953
9	26995562	LRRC19	0.0881159	0.3345	0.8964	0.09914	0.03451
19	3959299	DAPK3	0.0881867	NA	0.7728	0.02061	0.2558
1	89835209	GBP6	0.0882877	0.1541	0.09403	0.3627	0.1958
20	49354598	PARD6B	0.0883452	NA	0.2497	0.04998	0.3273
17	39017974	KRT12	0.0884853	0.2173	0.9774	0.4025	0.01208
16	55844871	CES1	0.0885446	0.02282	0.1153	0.8532	0.4605
8	75156799	JPH1	0.0886485	0.4056	0.1812	0.03315	0.4251
3	132401600	NPHP3	0.0887298	0.3213	0.2779	0.3317	0.03502
14	24838928	NFATC4	0.0887676	0.3205	0.547	0.007337	0.8069
6	28472253	GPX6	0.0891015	0.4242	0.008704	0.8752	0.3231
2	97507907	ANKRD23	0.0891106	0.02058	0.1263	0.6035	0.6657
3	12393125	PPARG	0.08912	0.08912	NA	NA	NA
4	76785594	PPEF2	0.0891549	0.04028	0.07207	0.3937	0.9144
7	123296171	LMOD2	0.0892624	0.3676	0.02887	0.1741	0.5667
1	154898899	PMVK	0.089418	0.4772	0.0459	0.0598	0.8016
20	60835075	OSBPL2	0.0894373	NA	0.1097	0.1621	NA
2	25013402	PTRHD1	0.08961	NA	NA	0.08961	NA
1	183849869	RGL1	0.0896991	0.1822	0.2022	0.161	0.1779
3	15676986	BTD	0.0898077	0.4621	0.03614	0.2661	0.2379
19	17212814	MYO9B	0.0898674	0.8764	0.1261	0.453	0.02114
12	57618853	NXPH4	0.08992	0.08992	NA	NA	NA
7	47840310	PKD1L1	0.0900694	0.7459	0.01419	0.8673	0.1157
3	170078232	SKIL	0.0902059	0.005489	0.7329	0.5176	0.5113
18	5891611	TMEM200C	0.0902592	0.05905	NA	0.3046	NA
19	19447991	MAU2	0.09028	NA	0.09028	NA	NA
1	155247660	HCN3	0.0903533	0.2867	0.3005	0.2726	0.04545
6	27840926	HIST1H4L	0.0903559	0.1097	NA	0.1099	0.3499
7	99319925	CYP3A7	0.0903686	NA	0.6631	0.04752	0.1339
8	146016869	RPL8	0.0903906	NA	0.1741	0.1035	NA
4	68370977	CENPC1	0.0909087	NA	0.3621	0.05012	NA
9	133981629	AIF1L	0.090974	0.07344	0.07208	0.6732	0.3028
1	33790496	PHC2	0.0910328	0.622	0.9728	0.01232	0.1449
16	1544302	TELO2	0.0910654	0.2963	0.3242	0.02401	0.4686
3	87276699	CHMP2B	0.0911153	0.1625	NA	0.112	NA
20	23026271	THBD	0.091129	0.01489	0.5345	0.1563	0.8698
15	89195422	ISG20	0.0911533	0.4454	0.02243	0.4276	NA
4	119610560	METTL14	0.0911619	0.2677	NA	0.06803	NA
7	100027688	MEPCE	0.0914323	0.2653	NA	0.0689	NA
4	78784013	MRPL1	0.0916103	NA	0.02394	0.7654	NA
12	14927610	H2AFJ	0.0917	0.0917	NA	NA	NA
15	51742525	DMXL2	0.0917917	0.4504	0.03113	0.3181	0.2454
21	46117792	KRTAP10-12	0.09191	0.09191	NA	NA	NA
12	14943486	WBP11	0.0920753	0.0995	0.4535	0.02961	0.8232
4	159592875	C4orf46	0.0921	0.0921	NA	NA	NA
17	79287710	TMEM105	0.0921011	0.05545	0.2866	0.5032	0.1376
1	100459132	SLC35A3	0.0921558	NA	0.6974	0.02647	NA
9	95064090	NOL8	0.0921669	0.1538	0.05006	0.6486	0.2206
4	39501825	UGDH	0.0922687	0.1921	0.9088	0.0249	NA
2	71738977	DYSF	0.09227	0.004384	0.3084	0.9164	0.8907
1	183616866	APOBEC4	0.0922744	0.08603	0.4086	0.433	0.07251
8	124238771	C8orf76	0.0923585	NA	0.01062	0.4211	0.9734
8	124238771	ZHX1-C8ORF76	0.0923585	NA	0.01062	0.4211	0.9734
5	140782731	PCDHGA9	0.0924077	0.1858	0.1933	0.3581	0.08601
2	190426852	SLC40A1	0.0926198	0.1581	NA	0.02781	0.9941
10	5005651	AKR1C1	0.0926328	0.8254	NA	0.02251	NA
9	115166387	HSDL2	0.0926497	0.1371	0.8481	0.2421	0.03946
6	14131844	CD83	0.09266	NA	NA	0.09266	NA
1	38463148	FHL3	0.0927253	0.6778	0.9975	0.286	0.005752
15	45545478	SLC28A2	0.0927401	0.2969	0.03797	0.2858	0.3453
5	56155618	MAP3K1	0.0928132	0.3041	0.1154	0.7302	0.04347
6	28227217	NKAPL	0.0928545	0.07084	0.1434	0.1536	0.7144
17	7760158	LSMD1	0.0928856	0.4356	0.8877	0.01135	NA
11	59829992	MS4A3	0.0928916	0.145	0.04895	0.6184	NA
19	48495314	BSPH1	0.09292	NA	NA	0.09292	NA
14	91007805	TTC7B	0.0929901	0.192	0.3518	0.2292	0.07217
5	75427935	SV2C	0.0930379	0.7878	0.08146	0.1028	0.1695
16	30080931	ALDOA	0.0930803	NA	0.1281	0.2833	0.1213
13	99449468	DOCK9	0.0931081	0.1921	0.2879	0.02257	0.8969
5	149825239	RPS14	0.09324	NA	NA	0.09324	NA
2	110303072	2021-09-10	0.0932683	0.2862	0.09766	0.3782	0.1062
11	111608216	PPP2R1B	0.0932742	0.7425	0.04339	0.1488	0.2342
1	55541174	USP24	0.0933468	0.6652	0.6651	0.1959	0.01297
19	54801978	LILRA3	0.0933684	0.3675	NA	0.05106	NA
15	52427943	GNB5	0.0933704	0.9961	0.6506	0.7285	0.002382
22	32586878	RFPL2	0.0935268	0.3883	NA	0.01273	0.8967
11	125769318	HYLS1	0.0935358	0.02746	0.5478	0.2947	NA
1	160580549	SLAMF1	0.0935752	0.02668	0.9425	0.1764	NA
6	125379202	RNF217	0.0936086	0.7835	0.02222	0.7652	0.08476
2	58276070	VRK2	0.0936526	0.05597	0.05459	0.8931	0.4141
4	37633026	RELL1	0.093746	NA	0.0441	0.1062	0.9496
6	41162204	TREML2	0.0937722	0.9492	0.7407	0.004368	0.3687
12	10163379	CLEC12B	0.0938086	0.3165	0.07737	0.2351	0.1968
4	4283543	LYAR	0.0938555	0.2483	0.8617	0.5502	0.009632
5	101572564	SLCO4C1	0.0938604	0.01163	0.448	0.992	0.2194
15	100211780	MEF2A	0.0938921	0.1068	0.124	0.2105	0.407
5	115177207	ATG12	0.0938947	0.1187	NA	0.1592	NA
11	68478462	MTL5	0.0939058	0.5443	0.8408	0.04485	0.05529
3	54958763	LRTM1	0.0939951	0.8596	0.2155	0.0241	NA
6	74183172	MTO1	0.0940239	0.5425	0.3629	0.0106	0.5449
1	145293490	NBPF10	0.09411	0.09411	NA	NA	NA
1	110050180	AMIGO1	0.0941717	0.1655	0.7382	0.8185	0.0114
7	95115332	ASB4	0.0942475	NA	NA	0.07339	0.2587
17	7608992	EFNB3	0.09426	NA	NA	0.09426	NA
15	73614857	HCN4	0.0942606	0.03155	0.2476	0.2522	0.5795
11	114168675	NNMT	0.09457	NA	NA	0.09457	NA
6	76369044	SENP6	0.0946554	0.3232	0.8332	0.3692	0.01156
15	77750775	HMG20A	0.0946643	0.08251	0.7388	0.05928	0.3181
17	8243598	ODF4	0.0947668	0.3635	0.09785	0.127	NA
3	38080952	DLEC1	0.0948409	0.6844	0.8312	0.01921	0.1055
22	18082846	ATP6V1E1	0.0948747	NA	0.08337	0.3896	0.1393
16	87741998	KLHDC4	0.0949091	0.2098	0.5989	0.01172	0.7838
2	11919747	LPIN1	0.094921	0.7657	0.1838	0.1704	0.04814
2	167055393	SCN9A	0.0949547	0.513	0.2542	0.1085	0.08164
2	239147490	HES6	0.0950542	NA	NA	0.08525	0.2251
9	130868670	SLC25A25	0.0951118	0.2201	0.1798	0.3526	0.083
1	158368356	OR10T2	0.0951155	0.2436	0.06643	0.1185	0.604
1	84356065	TTLL7	0.0952217	NA	0.09437	0.06346	0.7595
19	44635495	ZNF225	0.0953056	0.04152	0.9883	0.05436	0.5209
2	111425226	BUB1	0.0953228	0.06474	0.6073	0.06322	0.4676
7	141464348	TAS2R3	0.0953833	0.08237	0.794	0.1869	0.09518
10	102048208	PKD2L1	0.095452	0.1015	0.3046	0.06365	0.5919
20	44313483	WFDC10B	0.09561	NA	NA	NA	0.09561
5	176079877	TSPAN17	0.0959	NA	NA	0.0959	NA
15	89694986	ABHD2	0.0959316	NA	0.2533	0.03782	0.4799
1	32193185	BAI2	0.0960906	0.241	0.7735	0.01384	0.4563
4	56422799	PDCL2	0.0963	NA	NA	0.0963	NA
19	14805888	ZNF333	0.0963924	0.007059	0.7363	0.4228	0.5384
17	6927958	BCL6B	0.09643	NA	NA	0.09643	NA
3	64507857	ADAMTS9	0.0964583	0.2058	0.9174	0.0343	0.1829
4	154279749	MND1	0.09653	NA	NA	0.09653	NA
14	105915724	MTA1	0.0965627	0.02419	0.3085	0.6219	NA
11	64518016	PYGM	0.0966344	0.3275	0.1888	0.09762	0.1968
20	3208967	SLC4A11	0.0966576	0.1546	0.07318	0.5089	0.2064
3	186301661	DNAJB11	0.09672	NA	NA	0.09672	NA
2	217279850	SMARCAL1	0.0967267	0.4686	0.7624	0.04071	0.0818
1	53480714	SCP2	0.0968634	0.5006	0.02756	0.3379	NA
4	111539637	PITX2	0.0970129	0.0573	0.4508	0.0573	0.8076
1	20827826	MUL1	0.0970507	0.1239	0.7618	0.1428	0.08874
19	16265241	HSH2D	0.0970577	0.5005	0.6381	0.2215	0.01691
2	38156844	FAM82A1	0.0971155	0.4417	0.0576	0.08413	0.5594
17	56638900	TEX14	0.0971916	0.1504	0.9144	0.6363	0.0137
3	41288466	ULK4	0.0971992	0.07645	0.9858	0.06796	0.2341
19	49166741	NTN5	0.0973698	0.3232	0.025	0.926	0.1607
1	153516320	S100A4	0.0974	NA	NA	0.0974	NA
2	15372562	NBAS	0.0974594	0.2206	0.01286	0.4751	0.8934
7	73183768	CLDN3	0.0975126	NA	NA	0.03892	0.5091
1	27648785	TMEM222	0.0975691	0.9535	0.3388	0.03009	0.1241
6	29394926	OR11A1	0.0975898	0.07228	0.0433	0.6846	0.5632
1	24383873	MYOM3	0.0976582	0.2992	0.02764	0.1468	0.9951
19	41381717	CYP2A7	0.09766	0.09766	NA	NA	NA
11	27371856	CCDC34	0.0977604	0.00615	0.944	0.359	0.5806
5	54275218	ESM1	0.0977788	0.4251	0.2493	0.04459	NA
15	66206090	MEGF11	0.0978363	0.07731	0.1129	0.583	0.2381
13	53277791	LECT1	0.0979261	0.8089	0.04177	0.1169	0.3072
9	138012008	OLFM1	0.09805	NA	NA	0.09805	NA
1	193094286	CDC73	0.0983048	0.4894	NA	0.0409	NA
11	36518785	TRAF6	0.0983335	0.3118	NA	0.06422	NA
13	29236626	POMP	0.09841	0.09841	NA	NA	NA
17	8272767	KRBA2	0.0984172	0.3423	0.1743	0.03499	0.5859
7	98984354	ARPC1B	0.0984228	0.8521	0.4336	0.5542	0.005974
22	50869692	PPP6R2	0.0985769	0.06431	0.5332	0.1679	0.213
6	33168716	SLC39A7	0.0988214	0.2235	0.1819	0.8245	0.03673
14	96848757	C14orf129	0.09887	NA	NA	0.09887	NA
3	135720407	PPP2R3A	0.0992297	0.005594	0.8651	0.3313	0.773
4	71888176	DCK	0.0992882	0.1055	0.9863	0.04643	NA
11	125830970	CDON	0.0994105	0.742	0.1098	0.4904	0.03111
4	22748948	GBA3	0.0996119	NA	0.3698	0.02059	0.6375
3	195789515	TFRC	0.0996638	0.2947	0.2933	0.2124	0.06798
18	72168607	CNDP2	0.0998985	0.1607	NA	0.1271	NA
7	56049918	GBAS	0.0999242	NA	0.8501	0.00608	0.9434
8	21929924	EPB49	0.0999274	0.03003	NA	0.6804	NA
1	147119257	ACP6	0.100299	0.8742	0.03537	0.1352	0.3016
1	59787205	FGGY	0.100334	0.373	0.8223	0.004864	0.8456
13	114748792	RASA3	0.100364	NA	0.5579	0.01011	0.87
15	75310308	SCAMP5	0.1004	NA	NA	0.1004	NA
1	32667609	CCDC28B	0.100538	NA	0.06183	NA	0.333
9	104335472	GRIN3A	0.100594	0.108	0.6824	0.7483	0.02297
3	14174077	TMEM43	0.100628	0.0463	0.06766	0.4679	0.8647
20	29960720	DEFB118	0.100692	0.2545	0.2846	0.04472	0.3917
17	73144635	HN1	0.100765	0.1614	0.04326	0.2016	0.9024
8	132966167	EFR3A	0.100766	0.02361	0.2364	0.9664	0.2355
14	23344572	LRP10	0.100779	0.1952	0.1996	0.5351	0.06094
6	26033506	HIST1H2AB	0.101	0.101	NA	NA	NA
16	455023	DECR2	0.101067	0.05646	0.491	0.3033	0.1518
19	55556527	CTC-550B14.6	0.101092	NA	0.6489	0.1892	0.04039
6	41889505	BYSL	0.101123	0.3407	0.06334	0.1251	0.4732
9	35807327	NPR2	0.101167	NA	0.1035	0.2005	NA
15	65621441	IGDCC3	0.101214	0.07637	0.08408	0.3021	0.6595
18	76829525	ATP9B	0.101342	0.9235	0.6876	0.07726	0.02613
11	67163251	RAD9A	0.101374	NA	0.4844	0.6762	0.0152
10	75135885	ANXA7	0.101401	0.01707	0.4655	0.367	0.44
2	191064591	C2orf88	0.101471	NA	0.6029	0.03455	NA
19	44470147	ZNF221	0.101568	0.8898	0.03915	0.3181	0.1161
6	32154416	PBX2	0.101593	0.06415	NA	0.3252	NA
11	114568942	NXPE2	0.102006	0.05759	0.0581	0.4886	0.7924
11	62564009	NXF1	0.102037	0.6119	0.04623	0.1674	0.2737
17	1939344	DPH1	0.102175	0.2485	0.2266	0.4515	0.05109
1	94643581	ARHGAP29	0.102291	0.6342	0.05012	0.05904	0.6934
7	5521468	FBXL18	0.102311	0.2293	0.5696	0.01296	0.769
19	20728636	ZNF737	0.1024	NA	NA	0.1024	NA
10	71868790	H2AFY2	0.102529	0.02925	0.2604	0.2466	0.6954
10	103990230	PITX3	0.1027	0.1027	NA	NA	NA
7	53103382	POM121L12	0.102746	0.9119	0.08477	0.3027	0.05601
14	24736961	RABGGTA	0.10294	0.1907	0.3473	0.1826	0.1087
11	48346523	OR4C3	0.102992	0.3354	NA	0.06328	NA
9	74305020	TMEM2	0.103046	0.331	0.713	0.097	0.05752
14	55903280	TBPL2	0.103172	0.02265	NA	0.9391	NA
19	36394678	HCST	0.103248	NA	0.3918	0.05434	NA
3	53126518	RFT1	0.10327	0.1242	0.06793	0.1735	0.9027
10	53458049	CSTF2T	0.103278	NA	0.02531	0.8415	NA
7	73245639	CLDN4	0.1034	NA	NA	0.1034	NA
7	87704999	ADAM22	0.103434	0.01227	0.6208	0.3687	0.4717
3	127294805	TPRA1	0.103519	0.2001	0.2141	0.05698	0.5434
7	150642590	KCNH2	0.103562	0.03305	0.883	0.06358	0.7154
2	150427678	MMADHC	0.103639	0.9701	0.05477	0.03644	0.6864
9	131585069	C9orf114	0.103642	0.3145	0.02601	0.4313	0.3767
14	105395274	PLD4	0.103723	0.5637	NA	0.09701	0.09412
5	121413205	LOX	0.103734	NA	0.1723	NA	0.1243
1	176833427	ASTN1	0.103798	0.6428	0.1689	0.126	0.09739
1	235338597	ARID4B	0.103884	0.07694	0.383	0.2031	0.2229
2	219540127	STK36	0.10389	0.2914	0.473	0.1516	0.06385
19	5914422	CAPS	0.103982	0.08397	0.04683	0.4517	0.7522
16	2946541	FLYWCH2	0.104	0.104	NA	NA	NA
6	32781554	XXbac-BPG246D15.9	0.10408	0.0563	0.6785	0.3314	0.1057
12	111088061	HVCN1	0.10411	0.1512	0.07248	0.4722	NA
20	19915770	RIN2	0.104131	0.1342	0.4296	0.2962	0.07842
3	121289594	ARGFX	0.104201	NA	0.0757	0.3305	0.2071
8	42256264	VDAC3	0.104263	NA	0.2837	0.1584	0.1154
13	77625946	MYCBP2	0.104274	0.8711	0.009362	0.2492	0.6604
8	104778752	RIMS2	0.104293	0.3035	0.014	0.4056	0.779
15	90378852	C15orf38-AP3S2	0.104332	NA	0.8787	0.01332	0.4435
1	168154019	TIPRL	0.1044	NA	NA	0.1044	NA
20	42984447	HNF4A	0.104458	0.466	0.009646	0.6654	0.45
17	3514054	SHPK	0.104473	0.2168	0.5352	0.8678	0.01337
13	32977099	N4BP2L1	0.104474	0.1561	0.08803	0.3785	NA
10	31134017	ZNF438	0.104519	0.08694	0.104	0.1887	0.7896
19	10505719	CDC37	0.104536	NA	0.1355	0.1596	NA
11	123908879	OR10G7	0.104635	0.2246	NA	0.0964	NA
16	88705476	IL17C	0.104666	0.332	0.3417	0.04597	NA
16	81390486	GAN	0.105008	0.3182	0.2535	0.02658	0.6331
1	237540665	RYR2	0.105038	0.6824	0.9319	0.008004	0.2668
1	11252357	ANGPTL7	0.105077	0.01775	0.2803	0.2903	0.9408
21	36252895	RUNX1	0.105182	0.5752	NA	0.03789	NA
7	1785738	ELFN1	0.1052	0.1052	NA	NA	NA
7	33380556	BBS9	0.105203	0.05317	0.7904	0.08584	0.3774
3	15604875	HACL1	0.105255	0.7984	0.02139	0.2634	0.3029
10	34671513	PARD3	0.10527	0.02529	0.6639	0.1889	0.4297
1	183529339	NCF2	0.105355	0.1843	0.4701	0.03114	0.5058
1	197871863	C1orf53	0.105358	0.1202	NA	0.1817	NA
19	19823122	ZNF14	0.105423	0.007347	0.4563	0.9695	0.4203
18	22775185	ZNF521	0.105475	0.1203	0.3093	0.1943	0.1891
8	48878875	MCM4	0.10554	0.9761	0.1003	0.09154	0.1527
14	77732923	NGB	0.105578	0.1471	0.6983	0.02269	0.5875
3	49149020	USP19	0.105686	0.004888	0.4122	0.8859	0.7684
6	11185533	NEDD9	0.105777	0.05301	0.3599	0.3184	0.2261
16	75241024	CTRB2	0.105785	NA	0.6927	0.0124	0.6166
5	131308482	ACSL6	0.105877	0.008635	0.9162	0.6703	NA
4	144127342	USP38	0.105938	NA	0.03931	0.3764	0.3587
2	203155896	NOP58	0.105947	0.2229	0.5541	0.1359	0.08204
3	32578505	DYNC1LI1	0.106052	0.1477	0.03055	0.3477	0.8791
1	45288336	PTCH2	0.106132	0.1069	0.01764	0.8691	0.8426
7	99017705	ATP5J2-PTCD1	0.10621	0.2898	0.5167	0.02453	0.3764
7	99017705	PTCD1	0.10621	0.2898	0.5167	0.02453	0.3764
19	35504510	GRAMD1A	0.106233	0.01545	0.5739	0.831	0.1877
19	48715196	CARD8	0.106268	0.6513	0.9503	0.3165	0.007064
3	131100956	NUDT16	0.106477	0.4627	0.195	0.08051	0.1911
16	30910793	CTF1	0.1065	NA	NA	0.1065	NA
8	133723192	TMEM71	0.106661	0.6955	0.3166	0.04339	0.1457
4	123113428	KIAA1109	0.106669	0.1777	0.3431	0.09401	0.2429
15	38988815	C15orf53	0.106757	0.3172	NA	0.07001	NA
6	55196575	GFRAL	0.106771	0.3139	0.4221	0.06974	0.1509
15	41245676	CHAC1	0.106818	0.3692	0.4973	0.008836	0.8601
3	183967679	ECE2	0.107052	0.0153	0.1685	0.7565	0.718
6	155596901	CLDN20	0.107063	0.3937	NA	0.05661	NA
19	19741292	GMIP	0.107063	0.3181	0.3551	0.07255	0.1709
2	234580588	UGT1A9	0.107114	0.04522	0.5104	0.9931	0.06115
8	10383138	PRSS55	0.107251	0.03379	0.8711	0.2906	0.1642
2	162061198	TANK	0.107274	0.8347	0.01822	0.2781	0.3322
16	88930739	PABPN1L	0.107369	0.6166	0.04428	0.1548	0.3329
1	17634718	PADI4	0.107369	0.5764	0.3481	0.02603	0.2694
2	108910712	SULT1C2	0.107395	0.0809	0.0845	0.3145	0.6547
5	139947520	SLC35A4	0.10741	0.06642	0.6156	0.07487	0.4599
6	38224249	BTBD9	0.1075	NA	NA	0.1075	NA
12	56079053	ITGA7	0.107551	0.01483	0.1301	0.8693	0.8412
19	51768620	SIGLECL1	0.107563	0.78	0.04955	0.1404	NA
3	158428602	RARRES1	0.107649	0.5105	NA	0.04396	NA
16	28996725	LAT	0.1078	NA	NA	0.1078	NA
19	2476388	GADD45B	0.1079	NA	NA	0.1079	NA
2	68740735	APLF	0.107935	0.1437	0.1337	0.1074	0.6877
1	7907918	UTS2	0.107944	0.372	0.01496	0.9801	NA
22	25331451	TMEM211	0.108	NA	NA	0.108	NA
11	116706664	APOA1	0.108015	0.4725	0.02352	0.2893	0.4419
5	96118754	ERAP1	0.108016	0.08787	0.4076	0.1249	0.3176
17	3627347	GSG2	0.108153	0.6655	0.01884	0.1782	0.6372
4	164272165	NPY5R	0.108213	0.6132	NA	0.03684	NA
16	76482747	CNTNAP4	0.108314	0.007482	0.6986	0.9454	0.2888
13	52343310	DHRS12	0.108433	0.4418	0.1467	0.7025	0.0314
8	30694326	TEX15	0.108527	0.06859	0.07211	0.5124	0.5649
6	36645696	CDKN1A	0.108583	0.07652	0.5716	0.4358	0.07517
3	113165480	SPICE1	0.10874	0.007192	0.5325	0.6641	0.5647
1	36181807	C1orf216	0.108854	0.2623	0.7816	0.08903	0.07882
11	125365285	AP000708.1	0.1089	0.1089	NA	NA	NA
3	42916000	CYP8B1	0.108959	NA	0.7358	0.007526	0.9985
5	128301885	SLC27A6	0.109174	0.175	0.3806	0.1672	0.1298
19	14677022	NDUFB7	0.1092	NA	NA	0.1092	NA
6	33177782	RING1	0.10924	0.3198	0.4016	0.01625	0.6933
4	48496243	ZAR1	0.1093	NA	NA	0.1093	NA
12	11338669	TAS2R42	0.109363	NA	0.9165	0.02498	NA
1	89579694	GBP2	0.109412	0.1182	0.4223	0.1735	0.1675
17	48185986	PDK2	0.109436	0.2317	0.3502	0.06858	NA
21	44438248	PKNOX1	0.109458	0.05909	0.9476	0.09941	NA
6	39073345	SAYSD1	0.10949	0.3924	NA	0.05843	NA
15	45412435	DUOXA1	0.109494	0.01907	0.1583	0.6727	0.7152
5	43487210	C5orf34	0.109516	NA	0.04121	0.2401	0.563
1	17907108	ARHGEF10L	0.109518	0.3486	0.8147	0.01077	0.475
1	58939634	OMA1	0.109645	0.2219	0.06844	0.5034	0.1904
9	115642095	SLC46A2	0.109757	0.4838	0.1505	0.06704	0.2987
17	26905104	SPAG5	0.109785	0.9321	0.003754	0.4786	0.871
15	90446471	C15orf38	0.109964	NA	0.8787	0.01438	0.4435
21	33296950	HUNK	0.110044	0.0152	0.7163	0.3744	0.3592
10	114154815	ACSL5	0.11005	0.8925	0.07188	0.1154	0.1978
1	26872452	RPS6KA1	0.1101	NA	NA	0.1101	NA
17	27185660	ERAL1	0.110256	0.7034	0.8974	0.002494	0.933
3	121151784	POLQ	0.110279	0.3175	0.02462	0.3635	0.5171
18	2890560	EMILIN2	0.110438	0.04346	0.08218	0.6212	0.6638
7	97821855	LMTK2	0.110529	0.02399	0.479	0.3124	0.4108
1	43804305	MPL	0.110592	0.5383	0.6018	0.006619	0.6884
10	15145361	RPP38	0.110616	0.004269	0.824	0.6241	0.6726
6	90605664	GJA10	0.1107	0.05229	0.7118	0.05042	0.7878
19	50455180	SIGLEC11	0.110707	0.2856	0.6129	0.3224	0.0262
19	35639614	FXYD7	0.1108	NA	NA	0.1108	NA
2	80529956	LRRTM1	0.110871	0.3541	0.9747	0.2225	0.0193
19	52819102	ZNF480	0.111	NA	NA	0.111	NA
13	49281261	CYSLTR2	0.111031	0.3743	0.1157	0.06652	0.5157
20	43113099	TTPAL	0.1111	NA	NA	0.1111	NA
19	49573438	KCNA7	0.1112	NA	NA	0.1112	NA
7	42972038	MRPL32	0.111244	0.01479	0.6032	0.289	0.578
1	35824639	ZMYM4	0.111327	0.9003	0.1844	0.03261	0.2756
19	55670467	DNAAF3	0.111413	0.01446	0.5051	0.6512	0.3141
3	121351257	HCLS1	0.111431	0.2161	0.5834	0.05447	0.2176
4	38879720	FAM114A1	0.111529	0.03056	0.8063	0.2569	0.2364
6	170627174	FAM120B	0.111552	0.2168	0.2435	0.1084	NA
9	90262235	DAPK1	0.111567	0.2923	0.0387	0.1681	0.7874
9	139889162	CLIC3	0.1118	NA	NA	0.1118	NA
3	195245928	PPP1R2	0.111887	0.03327	NA	0.7083	NA
7	100205641	PCOLCE	0.111968	0.2255	0.2562	0.02683	0.9716
5	177634231	HNRNPAB	0.111998	0.1341	0.07541	0.5692	NA
1	31347320	SDC3	0.112115	0.3755	0.06601	0.1584	0.3844
7	39379547	POU6F2	0.112125	0.4309	0.1704	0.04443	0.4627
19	16842052	NWD1	0.112125	0.07328	0.07756	0.5168	0.5139
5	79854826	ANKRD34B	0.11213	0.3091	0.6892	0.0073	0.9707
14	20295873	OR4N2	0.112166	0.7893	NA	0.02995	NA
16	10721594	TEKT5	0.11221	0.3666	0.9943	0.3309	0.01253
14	20612267	OR4N5	0.112275	0.3296	0.1857	0.03121	0.7919
17	45730168	KPNB1	0.112478	0.1777	NA	0.1335	NA
6	32122386	PPT2	0.112515	0.681	NA	0.03485	NA
12	13364484	EMP1	0.112721	0.08297	0.5796	0.5574	0.0568
12	86373159	MGAT4C	0.113003	NA	0.3323	0.1846	0.09507
16	422085	TMEM8A	0.113005	0.3247	0.283	0.02807	0.5927
13	42761201	DGKH	0.113013	0.08894	0.165	0.997	0.1045
10	75005894	DNAJC9	0.1132	NA	NA	0.1132	NA
11	6621715	RRP8	0.113271	0.4458	0.8338	0.5054	0.008169
4	77184997	STBD1	0.113434	NA	0.1208	0.1985	NA
1	75199023	TYW3	0.113467	0.459	0.1301	0.5741	0.04489
19	8387803	KANK3	0.113485	NA	0.5732	0.9149	0.01119
11	129996662	APLP2	0.113524	0.007285	0.9347	0.3841	0.5889
22	32791113	C22orf28	0.113717	0.1332	NA	0.05452	0.8105
4	68606400	GNRHR	0.113755	0.6831	0.5462	0.00811	0.5107
9	33255252	BAG1	0.1138	NA	NA	0.1138	NA
19	2934107	ZNF77	0.113814	0.5024	0.4699	0.03763	0.1741
3	49721532	MST1	0.1139	NA	NA	0.1139	NA
11	63974995	FERMT3	0.113906	0.4087	0.09443	0.09527	0.4212
2	113831941	IL1F10	0.114011	0.1605	0.3776	0.0267	0.9585
11	61727389	FTH1	0.1141	0.1141	NA	NA	NA
3	196674259	PIGZ	0.114134	0.01704	0.8421	0.2987	0.3625
12	9822387	CLEC2D	0.11421	0.5931	0.04266	0.1603	0.3835
4	38798294	TLR1	0.114213	0.141	0.2686	0.6966	0.05896
17	48823124	LUC7L3	0.114215	0.4805	NA	0.05034	NA
9	35674053	CA9	0.114248	0.5511	0.01489	0.2164	0.8764
19	20228737	ZNF90	0.114273	0.4678	NA	0.05174	NA
1	111690455	CEPT1	0.114316	0.08824	0.2489	0.1564	0.4535
7	56155414	PHKG1	0.114432	0.1395	0.2753	0.09186	0.4423
4	44682767	GUF1	0.114543	0.6859	0.4307	0.6094	0.008681
9	130272445	FAM129B	0.114575	0.05839	0.4568	0.09321	0.6289
7	36396645	KIAA0895	0.114627	0.214	0.8706	0.03969	0.2116
7	95222201	PDK4	0.114664	0.8127	0.2243	0.01139	0.754
1	40310221	TRIT1	0.114842	0.02041	0.615	0.2717	0.4602
1	204170825	GOLT1A	0.114924	0.3809	0.2911	0.2819	0.05027
3	11067143	SLC6A1	0.114992	0.05015	0.09886	0.8496	0.3734
5	148753999	IL17B	0.115	NA	NA	0.115	NA
21	44589215	CRYAA	0.115127	0.05005	0.4317	0.08414	0.8668
16	3293149	MEFV	0.115176	0.09778	0.06644	0.9212	0.2635
22	30688488	TBC1D10A	0.115312	0.1451	0.6913	0.07676	0.2052
3	52876853	TMEM110	0.115715	0.613	0.2222	0.04433	NA
15	44085781	SERF2	0.1158	NA	0.1158	NA	NA
3	13612107	FBLN2	0.115918	0.1131	0.5005	0.05709	0.4931
5	5146335	ADAMTS16	0.115935	0.08013	0.4465	0.09503	0.4688
19	55587822	EPS8L1	0.115941	0.05979	0.5527	0.09747	0.4949
6	42176643	MRPS10	0.116064	0.0276	0.5827	0.6003	0.1654
7	65547874	ASL	0.116114	0.173	0.2433	0.06169	0.6154
11	55653617	TRIM51	0.116193	0.07237	NA	0.3416	NA
11	59189912	OR5A2	0.1162	0.1162	NA	NA	NA
10	20357145	PLXDC2	0.116318	0.3956	0.2046	0.03843	0.5152
1	146714427	CHD1L	0.116372	0.03818	0.6175	0.1145	0.5941
11	5344592	OR51B2	0.116387	NA	0.417	0.05941	NA
11	94861898	ENDOD1	0.116394	0.01911	NA	0.8494	0.3752
1	20639345	VWA5B1	0.116421	0.0151	0.2782	0.9606	0.3977
12	49298799	CCDC65	0.116432	0.4604	0.7345	0.3939	0.01205
3	50614965	HEMK1	0.116456	0.02579	0.5159	0.4581	NA
14	81251255	CEP128	0.116533	0.08607	0.6487	0.0504	0.5712
11	12183775	MICAL2	0.116559	0.3636	0.1901	0.03921	0.5933
19	30165134	PLEKHF1	0.116578	NA	0.5306	0.04413	0.2607
10	104590500	CYP17A1	0.116751	0.2256	0.8023	0.0338	NA
19	52084769	ZNF175	0.116795	0.3306	0.04042	0.2832	0.4263
11	111156523	C11orf53	0.1168	NA	NA	0.1168	NA
10	103825747	HPS6	0.117227	0.4461	0.1779	0.03119	0.6557
1	22140931	LDLRAD2	0.1174	NA	NA	0.1174	NA
1	150939281	CERS2	0.117444	0.1931	0.1478	0.4034	0.1414
9	35808263	SPAG8	0.117559	0.4193	0.1165	0.3164	0.1055
6	154481048	IPCEF1	0.11761	0.4714	0.187	0.1785	0.1037
5	131607096	PDLIM4	0.117636	0.9202	NA	0.02729	NA
7	137172379	DGKI	0.11778	0.0816	0.3358	0.1132	0.5273
11	75298327	MAP6	0.117804	0.04589	0.6074	0.1085	0.541
1	31896645	SERINC2	0.117845	0.01519	0.1739	0.9199	0.6737
6	159197440	EZR	0.117875	NA	0.155	0.05925	0.6756
20	37621052	DHX35	0.117949	0.4373	0.0279	0.5403	0.2487
2	69555414	GFPT1	0.118048	NA	0.0891	0.2831	NA
2	232879671	DIS3L2	0.118118	0.01657	0.8044	0.1463	0.8427
14	21489992	NDRG2	0.118268	0.3077	0.01765	0.6034	0.5025
4	139100372	SLC7A11	0.11828	0.6453	0.006772	0.5333	0.7067
5	140767503	PCDHGB4	0.118399	0.1821	0.06276	0.6331	0.228
15	34439049	C15orf29	0.1184	NA	NA	0.1184	NA
1	68962660	DEPDC1	0.118427	0.802	NA	0.03158	NA
19	49644685	PPFIA3	0.118449	NA	0.2335	0.9658	0.02771
5	96215503	ERAP2	0.11845	0.3986	0.9544	0.11	0.03945
18	2573067	NDC80	0.118647	0.1022	0.1485	0.8263	0.132
[truncated: 13,941 more rows]

## Sheet: STable17
Supplementary Table 17: All meta-analysis p-values using all Indo-European cohorts for ACAT
Chr	Pos	Gene	Meta-pvalue	EPICNorfolk	BDES	Indo-European	REHS
19	18499119	GDF15	4.94e-10	0.9519	NA	1.32e-07	9.71e-06
1	77510163	ST6GALNAC5	9.03e-10	NA	NA	9.03e-10	NA
19	8966706	MUC16	9.13e-10	0.681784	0.112927	6.01e-12	0.426208
3	46414573	CCR5	2.96e-09	0.329338	0.0623793	0.537158	6.62e-11
2	238475250	PRLH	1.15e-08	NA	NA	1.15e-08	NA
11	102562717	MMP27	2.35e-08	9.76e-10	0.9155	0.218839	0.03806
16	80641994	CDYL2	1.19e-07	0.827781	0.761634	1.11e-10	0.667835
11	57175299	SLC43A3	5.46e-07	NA	NA	4.58e-08	0.6503
2	10262973	RRM2	8.73e-07	NA	0.2754	0.009549	1.61e-06
18	44057151	LOXHD1	1.02e-06	7.23e-06	0.188041	0.00046028	0.87003
1	7846786	PER3	1.15e-06	0.219013	0.480812	0.049848	1.2e-07
2	234181677	ATG16L1	1.82e-06	NA	0.2243	4.76e-07	NA
13	31712572	HSPH1	1.82e-06	0.57865	0.002358	0.245736	3.19e-06
5	37108520	C5orf42	1.88e-06	0.165404	0.507687	2.4e-08	0.551538
20	43353380	WISP2	1.94e-06	0.07106	NA	1.61e-06	NA
19	6007724	RFX2	2.7e-06	0.224501	0.157187	6.73e-08	0.709854
8	145223240	MROH1	2.94e-06	0.77079	0.364291	0.43737	1.52e-08
1	153580155	S100A16	3.11e-06	0.7049	0.4795	5.15e-08	NA
14	56763840	PELI2	3.38e-06	0.2149	0.84931	9.62e-08	0.124926
4	85617141	WDFY3	3.68e-06	0.768682	0.365591	1.09e-08	0.792105
12	113587667	CFAP73	3.79e-06	0.5647	0.7419	0.771695	7.76e-09
20	62292793	RTEL1	3.83e-06	0.00270162	0.216706	4.44e-06	0.976974
11	63974995	FERMT3	4.03e-06	0.2754	0.0546689	0.459895	3.89e-07
2	216960759	TMEM169	4.07e-06	NA	NA	4.07e-06	NA
7	716867	PRKAR1B	4.18e-06	0.8244	0.4893	6.25e-08	0.1116
1	154302929	ATP8B2	5.19e-06	0.171089	0.474056	0.132148	3.38e-07
17	48941234	TOB1	6.82e-06	0.6513	NA	6.69e-07	NA
3	178922361	PIK3CA	7.15e-06	NA	NA	7.15e-06	NA
11	43905557	ALKBH3	8.88e-06	0.00142181	0.326618	0.13691	0.000106988
9	115940942	FKBP15	1.04e-05	0.701057	0.007539	1.97e-06	0.7892
17	4348380	SPNS3	1.04e-05	0.0471395	0.520881	0.659961	5.03e-07
8	95746907	DPY19L4	1.18e-05	0.4518	0.6304	2.75e-07	NA
16	77850832	VAT1L	1.26e-05	0.6025	0.5551	2.52e-07	NA
12	50571079	LIMA1	1.59e-05	0.1526	NA	1.05e-06	0.6842
19	45153113	PVR	1.61e-05	0.370098	0.713193	0.545169	9.55e-08
10	101544490	ABCC2	1.62e-05	0.239251	0.975854	0.0177666	3.33e-06
10	72434602	ADAMTS14	2.08e-05	0.000169578	0.180113	0.00093717	0.652306
11	128772601	C11orf45	2.27e-05	0.7794	NA	2.03e-06	NA
15	76668547	SCAPER	2.27e-05	0.990611	0.253334	0.0549476	1.5e-06
14	73973254	HEATR4	2.44e-05	0.57016	0.954165	0.70755	5.86e-08
3	196098796	UBXN7	2.57e-05	0.187	0.05799	3.44e-06	0.6424
10	104156506	NFKB2	2.61e-05	0.4907	NA	3.74e-06	NA
12	91357976	EPYC	2.9e-05	0.6156	0.1119	1.22e-05	0.0329776
2	232081369	ARMC9	3.49e-05	0.705615	0.113345	0.500622	8.63e-07
3	50337932	HYAL1	3.68e-05	0.793216	0.0651969	0.000101668	0.006983
1	36932047	CSF3R	3.81e-05	4.88e-07	0.801697	0.284225	0.344737
11	6953610	ZNF215	4.65e-05	0.195329	7.14e-06	0.386158	0.0903058
19	48949678	GRWD1	4.79e-05	0.500571	0.0258713	1.27e-05	0.306668
19	863220	CFD	4.93e-05	NA	0.2039	0.4081	4.76e-06
6	33247085	WDR46	5.02e-05	NA	NA	0.000106315	0.0349794
7	127292442	SND1	5.18e-05	0.167169	0.00435717	0.223105	0.000341106
15	89861818	POLG	5.34e-05	0.115083	0.0209504	0.00198985	0.0119792
8	43046697	HGSNAT	5.72e-05	6.93e-05	0.00457061	0.749651	0.2627
5	140011785	CD14	5.73e-05	NA	NA	0.1866	2.3e-05
11	63713377	NAA40	5.93e-05	0.46589	0.123452	0.225287	5.03e-06
11	67351964	GSTP1	5.98e-05	0.68667	0.832419	0.223702	5.15e-07
14	93652787	TMEM251	6.09e-05	0.0475169	0.824253	0.00650539	0.00026409
1	43213035	P3H1	6.9e-05	0.952125	0.435791	0.000218427	0.000863907
11	62284299	AHNAK	6.95e-05	0.551007	0.496164	0.586817	4.92e-07
7	56049918	NIPSNAP2	7.32e-05	NA	0.910632	6.14e-06	NA
8	27320526	CHRNA2	7.4e-05	0.432076	0.0685941	0.406725	7.07e-06
1	120293430	HMGCS2	7.76e-05	0.00353373	0.0911743	0.963245	0.000290811
12	108086847	PWP1	7.88e-05	0.345093	0.488085	0.000952724	0.000572453
17	57287425	SMG8	8.51e-05	4.2e-05	0.0532537	0.0997342	0.4519
8	101719199	PABPC1	8.78e-05	NA	NA	8.78e-05	NA
6	30154052	TRIM26	8.88e-05	0.120033	0.8503	7.63e-06	NA
22	17447140	GAB4	9.08e-05	0.0180141	0.41223	4.29e-05	0.3423
11	55797896	OR5AS1	9.86e-05	NA	NA	9.86e-05	NA
13	48881492	RB1	9.95e-05	0.33028	0.110655	0.100215	3.33e-05
3	50308808	SEMA3B	0.000106099	0.00312346	0.683274	0.53788	0.000114822
19	58549337	ZSCAN1	0.000109494	2.29e-05	0.0525323	0.824685	NA
5	76729018	WDR41	0.000118036	0.69471	0.0606341	0.00753588	0.000472691
6	138752066	NHSL1	0.000119746	0.0018205	0.469672	0.0915291	0.00195115
1	183849869	RGL1	0.000129227	4.03e-06	0.368358	0.897174	0.1258
15	78466028	ACSBG1	0.000130764	0.255533	0.510564	0.000232793	0.00559659
3	52570892	SMIM4	0.000130794	0.8255	NA	2.65e-06	0.557
4	119948059	SYNPO2	0.000132081	0.000295328	0.397127	0.00303634	0.48318
2	113479635	NT5DC4	0.000133441	0.000133441	NA	NA	NA
9	116854714	KIF12	0.000144657	0.4568	0.06032	0.862465	8.09e-06
12	54893194	NCKAP1L	0.000149854	0.0581422	0.856953	5.3e-06	0.760096
3	31656614	STT3B	0.000150147	NA	NA	0.000150147	NA
17	27225549	DHRS13	0.000152012	0.09172	NA	0.00013473	NA
10	99968670	R3HCC1L	0.000153083	0.549468	0.621811	2.15e-05	0.0280457
12	113633458	IQCD	0.000159121	0.14239	NA	0.985371	1.09e-05
15	72119251	MYO9A	0.000161545	0.0910724	0.470948	0.222073	2.31e-05
17	38925270	KRT26	0.000165282	0.0136095	0.326775	0.533867	9.53e-05
6	131206394	EPB41L2	0.000171829	0.112997	0.130449	0.800859	2.01e-05
20	32369114	ZNF341	0.000172512	0.306446	0.0506336	0.731743	2.1e-05
12	112605167	HECTD4	0.000179685	0.502158	0.0939297	3.47e-05	0.153131
19	10247822	DNMT1	0.000188722	0.838358	0.413281	0.40646	1.89e-06
10	72192832	NODAL	0.000193147	0.8443	NA	1.9e-05	NA
8	144808953	FAM83H	0.000209953	0.009728	0.0197727	0.00178231	0.884914
16	84495318	ATP2C2-AS1;ATP2C2	0.000218521	NA	0.01479	NA	0.001241
1	197059382	ASPM	0.00022572	0.0424132	0.0610162	0.561964	0.000228018
2	74274681	TET3	0.000233288	0.674598	0.937568	1.23e-05	0.0443906
2	219204592	PNKD	0.000237065	0.60134	0.000605177	0.0313078	0.0309153
6	32163558	NOTCH4	0.000239343	0.652955	0.254853	0.158647	1.35e-05
9	107331618	OR13C8	0.000240526	NA	0.9288	0.129906	2.05e-05
6	149826740	PPIL4	0.000240582	0.005549	NA	0.00367405	NA
5	71516795	MRPS27	0.00024555	7.54e-06	0.2032	0.845791	0.283842
4	185587165	PRIMPOL	0.000246177	0.03513	0.05886	0.013632	0.01309
19	47535548	NPAS1	0.000252087	8.63e-07	0.9325	0.674521	0.6999
7	48266876	ABCA13	0.000255411	0.00478822	0.114799	0.0646175	0.0108703
9	99521211	ZNF510	0.000261943	0.311528	0.385961	5.87e-06	0.564345
4	13590380	BOD1L1	0.000266977	0.00635241	0.398765	0.107501	0.00149745
9	132501906	PTGES	0.0002731	NA	NA	0.0002731	NA
3	11067143	SLC6A1	0.000274886	9.88e-05	0.03039	0.811475	0.1735
20	40710643	PTPRT	0.000275021	0.159695	0.34709	8.85e-06	0.862278
2	210557879	MAP2	0.000281043	0.548325	0.111823	0.914253	7.75e-06
19	282181	PLPP2	0.000285332	0.000163506	0.339792	0.0592897	0.134379
9	135470473	DDX31	0.000291985	0.578147	0.892732	3.71e-05	0.0237843
9	133884747	LAMC3	0.000292973	0.166399	0.00612207	0.000746072	0.601738
16	58537777	NDRG4	0.000293869	0.000201446	0.08092	0.678272	0.04152
9	214593	C9orf66	0.000296122	0.445755	NA	5.74e-05	NA
18	64211217	CDH19	0.000316373	NA	0.555666	0.000282522	0.0217078
17	72838681	GRIN2C	0.000317006	0.920743	0.52108	2.32e-05	0.0452943
4	177046444	WDR17	0.000329057	0.146209	0.0206932	0.00322971	0.0540339
7	1476379	MICALL2	0.000329248	0.380933	0.665851	5.12e-06	0.406862
10	118231360	PNLIPRP3	0.000340936	0.69763	0.595497	5.99e-05	0.0221706
3	49735503	RNF123	0.000354112	0.1289	0.712593	1.11e-05	0.567157
19	856130	ELANE	0.0003598	NA	0.0001024	NA	0.3093
1	213244366	RPS6KC1	0.000382716	0.0190776	0.419074	0.0811088	0.000981981
1	246922356	SCCPDH	0.000387797	0.1416	0.623615	0.000838251	0.00874468
15	63632516	CA12	0.000417169	0.5767	NA	6.46e-05	NA
14	30046460	PRKD1	0.000421596	NA	0.867316	0.0343157	0.0001604
16	89952262	TCF25	0.000423473	0.368757	0.642566	3.54e-06	0.860901
19	8576629	ZNF414	0.000427585	0.003574	NA	0.01071	NA
5	5146365	ADAMTS16	0.000432274	8.38e-05	0.282463	0.0464362	0.674017
16	57795077	KIFC3	0.000435204	0.155723	0.400988	0.0286589	0.000417486
8	95143154	CDH17	0.000456543	0.581655	0.4686	0.0114592	0.000253895
16	23573958	UBFD1	0.0004574	0.0004574	NA	NA	NA
19	39421241	SARS2	0.000458724	0.0729301	0.148285	9.57e-05	0.7708
16	66919667	PDP2	0.000462261	0.9726	0.2218	5.6e-06	0.6667
16	85838709	COX4I1	0.000486174	NA	NA	8.32e-05	0.5298
10	43659382	CSGALNACT2	0.000487273	NA	7.44e-05	0.593938	NA
5	140781	PLEKHG4B	0.000522121	0.853524	0.325542	0.000190155	0.0177453
5	37303392	NUP155	0.000527025	NA	0.419146	0.000114926	NA
14	34985666	EAPP	0.000532585	0.477269	NA	0.009891	0.001332
17	9497560	CFAP52	0.000533996	0.737273	7.41e-06	0.341203	0.517321
7	23235469	NUPL2	0.000534074	0.0368381	0.888156	0.381852	7.72e-05
5	1322993	CLPTM1L	0.000536934	0.0005029	0.493679	0.00407169	0.9605
3	33840234	PDCD6IP	0.000555791	NA	NA	0.000555791	NA
2	169780250	ABCB11	0.000557618	0.0335581	0.165485	0.530621	0.000345454
11	73141742	FAM168A	0.0005594	NA	NA	0.0005594	NA
15	75632170	COMMD4	0.00056854	NA	NA	0.00056854	NA
17	60030333	MED13	0.000569811	0.315854	0.193181	0.000217119	0.0789476
3	134264540	CEP63	0.000596412	0.828312	0.461595	1.88e-05	NA
6	31584180	AIF1	0.0006008	NA	NA	0.0006008	NA
3	128780823	GP9	0.000602389	NA	NA	0.000602389	NA
19	16764936	SMIM7	0.000609134	0.735	0.7319	1.37e-05	NA
9	99694051	NUTM2G	0.000610788	0.000610788	NA	NA	NA
11	59271238	OR4D11	0.000612822	NA	NA	0.000612822	NA
16	86544651	FOXF1	0.0006147	NA	NA	0.0006147	NA
7	45216926	RAMP3	0.000618509	NA	0.0471309	0.000162234	0.981439
19	7754101	FCER2	0.000624879	NA	NA	0.000624879	NA
4	48894868	OCIAD2	0.000641629	NA	0.2615	0.0002288	NA
12	121004739	RNF10	0.000641817	0.9042	0.6871	0.487341	4.01e-06
1	222801235	MIA3	0.000657554	0.202302	0.508409	0.0511434	0.000237939
16	22122273	VWA3A	0.000677337	0.00375972	0.470876	0.00196836	0.372795
1	248551079	OR2T6	0.000684276	1.33e-05	0.7589	0.86564	0.1506
11	123810603	OR4D5	0.000687334	0.12634	0.235747	0.0598584	0.0007422
1	161044549	NECTIN4	0.000688074	0.912207	0.0689078	0.0418041	0.000504242
6	54219405	TINAG	0.000705372	0.42487	0.526825	1.73e-05	0.353026
15	75648533	MAN2C1	0.000724359	0.285754	0.0269664	0.00277602	0.066077
21	47746307	PCNT	0.000740855	0.224428	0.50658	0.128672	9.94e-05
1	23110905	EPHB2	0.000752125	0.689752	0.06576	0.000208634	NA
4	84015850	PLAC8	0.0007547	NA	NA	0.0007547	NA
5	175740782	SIMC1	0.000763735	0.104245	0.826993	0.023383	0.0007495
10	97698647	CC2D2B	0.000784949	0.3239	NA	0.000230772	NA
17	39114915	KRT39	0.000786285	0.713324	0.828929	0.101169	2.62e-05
11	59622246	TCN1	0.000798337	0.454025	0.6684	5.37e-06	0.980375
6	72678766	RIMS1	0.000819689	0.482995	0.06799	0.000139469	0.360642
4	187509931	FAT1	0.000825087	0.0481392	0.944364	3.76e-05	0.974344
10	93711300	BTAF1	0.000827141	0.949818	0.547245	0.000844864	0.00380445
7	114563533	MDFIC	0.000831293	0.560603	0.0398157	0.000166573	0.4522
11	47008768	C11orf49	0.000836628	0.000195616	0.09755	0.382688	0.2321
12	125284671	SCARB1	0.000839281	0.388912	NA	0.000206957	NA
16	67709072	GFOD2	0.000840797	NA	NA	0.000840797	NA
7	73634076	LAT2	0.000845915	0.146311	NA	8.88e-05	0.8376
16	334531	PDIA2	0.000888409	0.0433352	0.130082	0.000996356	0.325555
3	49004687	ARIH2	0.0008895	NA	NA	0.0008895	NA
6	83074734	TPBG	0.000894732	0.00212922	0.006305	0.228346	0.601854
20	44803287	CDH22	0.000895047	0.835665	0.3169	0.00445648	0.001564
12	123214372	HCAR1	0.000898201	0.2577	0.158354	0.78468	5.79e-05
14	94830759	SERPINA2	0.000898599	0.000898599	NA	NA	NA
15	76170353	UBE2Q2	0.000903047	NA	0.05082	0.000572807	0.4041
14	23242895	SLC7A7	0.000906283	0.571858	0.347539	1.7e-05	0.555
5	167993100	PANK3	0.000923215	NA	0.02107	0.004245	NA
1	153747906	SLC27A3	0.000930392	2.07e-05	0.159043	0.685721	0.858669
8	25101205	DOCK5	0.000931457	0.118547	0.179021	0.0886086	0.00103233
4	8376719	ACOX3	0.000936119	0.967794	0.95179	0.262805	8.07e-06
22	19118992	TSSK2	0.000938524	0.563281	NA	0.467209	4.68e-05
9	109688832	ZNF462	0.000982993	0.000113751	NA	0.151105	0.757244
1	228399671	OBSCN	0.000995734	0.123437	0.9142	5.79e-05	0.323312
12	13238121	GSG1	0.00102154	NA	NA	0.000285674	0.350243
12	80014927	PAWR	0.00106147	NA	NA	0.000227056	0.4598
11	88027242	CTSC	0.00106545	0.530978	NA	0.000197438	NA
11	60636633	ZP1	0.00106879	0.000149464	0.792552	0.0491839	0.396646
1	23759594	ASAP3	0.00108454	0.899031	0.554842	0.0168717	0.000279742
6	26205139	HIST1H4E	0.00110538	0.00110538	NA	NA	NA
1	11073982	TARDBP	0.00114119	0.276211	NA	0.0004096	NA
11	65361256	KCNK7	0.00115779	NA	0.997109	0.70868	2.24e-05
17	7749972	KDM6B	0.00116811	0.0047015	0.498177	0.551991	0.00200118
10	12123525	DHTKD1	0.00120342	0.743845	0.572571	0.922421	6.84e-06
7	44663949	OGDH	0.00120633	0.00940387	0.143253	0.0757142	0.0264269
6	135290443	HBS1L	0.00122348	0.862676	3.62e-05	0.229629	0.3827
6	159197440	EZR	0.00124299	NA	0.00708164	0.00362739	0.6709
7	959665	ADAP1	0.00128373	0.0003034	NA	0.1331	0.4436
15	49030841	CEP152	0.00128851	1.21e-05	0.633745	0.988717	0.386666
5	141025677	FCHSD1	0.00129287	0.6461	0.9993	0.830632	5.49e-06
1	38463148	FHL3	0.00129323	0.199523	0.0633995	0.183143	0.00127134
10	103339484	POLL	0.00129553	0.344072	0.0732028	0.000719077	NA
1	247875276	OR6F1	0.00131112	NA	NA	0.00131112	NA
19	7735140	RETN	0.00132192	NA	0.3361	6.46e-05	0.8546
10	95076472	MYOF	0.00133413	0.577683	0.070284	0.00246405	0.030633
2	179701661	CCDC141	0.00134202	0.5499	0.0172769	0.000413365	0.786271
11	4608061	OR52I2	0.001343	NA	NA	0.001343	NA
1	247978885	OR14A16	0.00136646	0.5589	0.821	0.843907	8.16e-06
8	67478328	MYBL1	0.00136795	NA	0.6855	9.91e-05	0.2846
17	40556955	CAVIN1	0.00137686	0.0628666	0.860026	0.128707	0.000458496
19	39292491	LGALS4	0.00137757	0.236	NA	0.105001	0.0007868
17	76115441	TMC6	0.00139084	0.223382	0.893638	0.826051	1.96e-05
17	56384991	TSPOAP1	0.00144198	0.0222731	0.313453	0.0012662	0.382885
11	59599205	GIF	0.00145669	0.866475	0.137414	0.000237504	0.121256
19	15052665	OR7C2	0.00146287	0.003466	NA	0.04302	NA
22	24432578	CABIN1	0.00147355	0.773314	0.88953	9.11e-05	0.0555292
19	18273910	PIK3R2	0.00147746	0.6096	0.820049	1.04e-05	0.6716
10	44053340	ZNF239	0.00147909	NA	0.0149033	0.0101286	NA
11	74421894	CHRDL2	0.00149432	0.19625	0.6606	6.98e-05	0.3915
22	35783110	HMOX1	0.00156497	0.000274593	0.209633	0.125167	0.52167
2	219319666	USP37	0.00158143	0.008453	0.37985	0.864817	0.00137186
16	88782074	PIEZO1	0.00159101	0.128523	0.66006	0.0295518	0.00153135
14	20925270	APEX1	0.00161961	0.00668784	0.7922	0.00447141	NA
7	116165144	CAV1	0.00162291	0.138	NA	0.001213	NA
15	85326955	ZNF592	0.00162945	0.649106	0.0607834	0.00056049	0.179
19	17534540	MVB12A	0.00164064	0.0255167	0.643958	0.000633374	0.3837
9	90497847	SPATA31E1	0.00164586	0.029094	0.820785	0.398286	0.000421578
3	186915414	RTP1	0.00164881	0.00855268	0.09101	0.869304	0.00593938
6	38749064	DNAH8	0.0016496	0.253774	0.911952	0.000991854	0.0175187
9	140450082	DPH7	0.00165433	0.006882	0.660147	0.00534956	NA
16	10626763	EMP2	0.00166117	0.780119	0.8697	3.6e-05	NA
11	55904404	OR8J3	0.00166715	NA	0.06826	0.00252695	NA
19	58639296	ZNF329	0.00167921	0.0507985	0.05007	0.00212223	0.7622
7	82390055	PCLO	0.00168171	0.0067464	0.00356243	0.914693	0.18751
10	124672351	FAM24A	0.001688	NA	NA	0.001688	NA
19	58517342	LOC100128398	0.001697	0.001697	NA	NA	NA
3	49215404	C3orf84	0.0017107	NA	0.008234	0.02156	NA
14	100847338	WDR25	0.0017187	0.85369	0.388295	0.620763	2.06e-05
6	32781500	HLA-DOB	0.0017315	0.817396	0.743909	0.000345675	0.02036
6	50811026	TFAP2B	0.00174778	0.2842	0.1142	0.0145185	0.009192
19	41704370	CYP2S1	0.00174884	0.761559	0.336	1.94e-05	0.8732
9	5522576	PDCD1LG2	0.00175766	0.0241839	0.08246	0.07312	0.02992
1	84944978	RPF1	0.00178427	0.397137	0.615099	0.521735	3.49e-05
1	2445838	PANK4	0.00178921	NA	NA	0.00178921	NA
17	39880966	HAP1	0.00179205	0.0506933	0.987366	0.00598012	0.0149434
20	62496735	TPD52L2	0.00180071	0.002598	0.05523	0.0621	0.5051
11	56344267	OR5M10	0.001817	NA	NA	0.001817	NA
13	111293895	CARS2	0.00182524	0.205136	0.49971	0.704687	6.34e-05
8	32617888	NRG1	0.00183671	0.437492	0.972631	0.847649	1.28e-05
12	104187732	NT5DC3	0.00184595	0.3421	0.8653	0.6568	2.39e-05
16	70843712	HYDIN	0.00190579	0.0161885	0.7405	0.0597838	0.00675584
19	58867567	ZNF497	0.00192141	NA	0.5727	0.00746199	0.006814
6	49459870	CENPQ	0.00194651	0.445437	0.123779	0.000536501	NA
12	48543257	ASB8	0.0019752	0.0001394	0.2405	0.898081	NA
16	67218683	EXOC3L1	0.00199075	0.566646	0.389475	3e-05	0.773577
11	61179392	CPSF7	0.002012	NA	NA	0.002012	NA
5	55237014	IL6ST	0.00201284	0.470167	0.95344	3.36e-05	0.344917
15	74560764	CCDC33	0.00201797	0.289104	0.843737	2.61e-05	0.8187
20	51870151	TSHZ2	0.00210308	0.000107144	0.707759	0.123759	0.585818
13	77566147	CLN5	0.00211222	0.0283607	NA	0.00792239	NA
12	122657198	IL31	0.00211331	0.002975	0.1473	0.07457	NA
1	152006266	S100A11	0.00212404	0.04296	0.07865	0.009731	NA
12	66765616	GRIP1	0.0021615	0.522335	0.679329	0.00888667	0.00180636
15	51634150	GLDN	0.00216553	0.256026	0.450717	0.0711642	0.000695295
3	97664642	RIOX2	0.00216765	0.444521	0.01317	0.00194195	0.502866
2	167055393	SCN9A	0.00219782	0.430927	0.0030123	0.00972951	0.460829
17	8638499	CCDC42	0.00220745	0.0453036	0.01724	0.0280894	0.266793
14	24032616	AP1G2	0.00222186	0.162116	0.421134	0.000508622	NA
16	19049346	TMC7	0.00223	0.353347	0.735638	0.0727507	0.000313614
7	92027906	ANKIB1	0.00225221	0.8114	0.000385613	0.112826	NA
12	235022	IQSEC3	0.00226624	0.00642401	0.1834	0.03019	NA
6	155450649	TIAM2	0.00226763	0.397151	0.0382403	0.241224	0.00165427
8	39603992	ADAM2	0.002274	0.00804628	0.374919	0.0685146	0.0294286
15	76452476	TMEM266	0.00227718	0.04179	0.232605	0.27586	0.00227242
5	118451873	DMXL1	0.00228082	0.742402	0.611521	0.000528267	0.0254603
4	73943154	ANKRD17	0.00228471	0.172296	0.3171	0.357971	0.0003129
5	78985833	CMYA5	0.00228531	0.0899093	0.191805	0.179014	0.001983
8	37689051	ADGRA2	0.00228917	0.730076	0.715142	0.0213151	0.000551283
17	7323821	SPEM1	0.00229265	0.721714	0.757261	0.271031	4.15e-05
2	39487824	MAP4K3	0.00229329	0.177697	0.000108054	0.43338	0.739
22	38109227	TRIOBP	0.00232984	0.513347	0.498764	0.0112758	0.00217409
13	52343310	DHRS12	0.0023709	0.017996	0.184094	0.636115	0.00304658
21	43767595	TFF2	0.0023896	NA	NA	0.220687	0.001169
20	62191282	HELZ2	0.00242563	0.00957391	0.314341	0.102666	0.0214043
15	75931966	IMP3	0.00244597	0.2198	0.000917083	0.226385	0.1465
5	162902464	HMMR	0.00245715	8.6e-05	0.590782	0.237087	0.558289
12	101680273	UTP20	0.00248004	0.786147	0.000379663	0.0250632	0.90987
5	140021612	TMCO6	0.00249796	NA	NA	0.00249796	NA
21	47581866	SPATC1L	0.00250455	0.2862	0.4712	6.87e-05	0.7441
10	13217636	MCM10	0.00251409	0.156146	0.00148	0.19955	0.150233
6	39835372	DAAM2	0.00257117	0.0604138	0.550848	0.000300033	0.714393
14	23596534	SLC7A8	0.00257659	0.172585	0.367551	0.000293048	0.384771
4	164272165	NPY5R	0.00260102	0.613	NA	0.00046284	NA
8	142222331	SLC45A4	0.00261485	0.00119826	0.86711	0.0155041	0.452594
2	99170912	INPP4A	0.00262739	0.481892	0.665	5.14e-05	0.4454
10	16877080	CUBN	0.00277639	0.919377	0.656869	2.59e-05	0.503949
1	114438448	AP4B1	0.00277907	0.276331	0.00399506	0.655419	0.0109077
13	25744148	AMER2	0.00278644	0.927082	0.276122	0.176932	0.000174855
9	139390585	NOTCH1	0.0027982	0.000741069	0.123078	0.212128	0.411575
15	90446471	ARPIN;C15orf38-AP3S2	0.00281389	NA	NA	0.00281389	NA
7	32609689	AVL9	0.00282928	0.05803	0.674485	0.000273524	0.7546
16	2215901	TRAF7	0.00285584	NA	NA	0.00285584	NA
10	72357903	PRF1	0.00289098	0.000196252	0.0938808	0.532574	0.8468
3	73433730	PDZRN3	0.00292202	0.299318	0.214979	0.000331331	0.395193
21	47532405	COL6A2	0.00293186	0.0185664	0.0511984	0.00939032	0.948073
7	141672669	TAS2R38	0.00295617	NA	NA	0.00295617	NA
19	33321545	SLC7A9	0.00296275	0.979092	0.0117645	0.0425854	0.01749
6	32122431	PPT2	0.00296662	0.426277	NA	0.000771569	NA
2	43458394	THADA	0.00298125	0.000388809	0.148058	0.202855	0.740661
3	51907870	IQCF5	0.00298945	NA	0.05591	0.00593366	NA
6	152129063	ESR1	0.00302232	0.911227	0.0191411	0.704526	0.000716538
12	66531886	TMBIM4	0.00302858	0.73203	0.202192	0.170331	0.0003502
16	15797967	MYH11	0.00310566	0.0633405	0.00101993	0.149084	0.947284
7	30638442	GARS	0.00311024	0.250425	0.00684547	0.0103642	0.5145
11	64950331	CAPN1	0.00315777	0.0265821	0.562007	0.186909	0.00333924
12	101493469	ANO4	0.00318319	0.0003159	0.1325	0.28291	0.7957
5	96066502	CAST	0.00320337	0.698167	0.00691619	0.00267077	0.7367
12	96640857	ELK3	0.00320376	0.318961	0.364449	0.992024	8.24e-05
1	214454770	SMYD2	0.00321078	0.00306709	0.1796	0.0222273	0.7783
4	81188221	FGF5	0.00324656	0.530505	0.508285	3.63e-05	0.987782
19	7505000	ARHGEF18	0.00325873	0.556135	0.356263	0.453323	0.000108176
14	100118594	HHIPL1	0.00326061	NA	0.05405	0.006768	NA
3	194408302	FAM43A	0.00330855	NA	0.5715	0.0006507	NA
10	119774577	RAB11FIP2	0.00335667	0.000127342	0.319214	0.290019	0.856744
7	101944171	SH2B2	0.00336888	NA	0.00387953	0.0978271	NA
10	125771945	CHST15	0.0033916	0.6456	0.1482	0.822495	0.0001301
9	140109141	NDOR1	0.00341314	0.000213227	0.212181	0.620044	0.368005
11	24759780	LUZP2	0.00342385	NA	NA	0.336976	0.001147
13	42149949	VWA8	0.00348766	0.958409	0.512884	6.55e-05	0.329848
20	55904965	SPO11	0.00350925	0.274957	0.901707	0.509831	8.47e-05
4	57777078	REST	0.00356524	0.287018	0.155417	0.659563	0.000371533
20	21117134	KIZ	0.00357546	0.1148	0.0009671	0.559014	NA
3	155198984	PLCH1	0.00364347	0.269423	0.229558	0.0194502	0.00934949
20	62705874	RGS19	0.00365963	0.004663	NA	0.113	0.1212
11	65384944	PCNX3	0.00370156	0.000386845	0.226956	0.620422	0.210814
4	175413228	HPGD	0.00371187	NA	NA	0.00127409	0.3323
12	109281339	DAO	0.00372571	NA	0.000133519	0.685363	0.7134
10	105727558	SLK	0.00373394	0.581801	4.41e-05	0.536645	0.8436
19	38946175	RYR1	0.00379687	0.354722	0.14669	0.890326	0.000256297
3	52457310	PHF7	0.00380307	0.000167	0.6403	0.626136	NA
8	54727289	ATP6V1H	0.00383166	0.6635	0.000124402	0.354831	0.4103
14	23745668	HOMEZ	0.00390395	0.6002	0.772218	0.341115	7.79e-05
16	15134955	NTAN1	0.00390711	0.7369	0.2062	0.0281838	0.002879
22	32616985	SLC5A4	0.00391037	0.169726	0.116309	0.0105372	0.0593372
8	144896066	SCRIB	0.00391743	0.7939	0.463873	0.018752	0.00179157
13	50589929	KCNRG	0.00392524	0.0146559	NA	0.03077	NA
4	79166478	FRAS1	0.00393846	0.0685286	0.43445	0.0939369	0.00445512
6	170102748	C6orf120	0.00393928	0.01625	0.6009	0.001663	0.7675
16	31102589	VKORC1	0.00400968	0.00142486	NA	0.3242	NA
1	93672720	CCDC18	0.00403396	NA	0.163081	0.00109051	0.4048
3	51671458	RAD54L2	0.00410024	0.181685	0.9957	0.000121981	0.595395
12	7280924	RBP5	0.004157	NA	0.004157	NA	NA
2	232392957	NMUR1	0.00419535	0.852159	0.11059	0.00532013	0.02701
7	12620766	SCIN	0.00419785	0.000215148	0.365926	0.295781	0.582
7	81334825	HGF	0.00420933	0.1352	0.00528078	0.106261	NA
15	70949398	UACA	0.00422709	0.349591	0.718082	0.00385809	0.014122
15	65917082	SLC24A1	0.00424896	0.786656	0.712844	4.55e-05	0.539723
3	138219316	CEP70	0.0042794	0.586527	0.446988	0.207755	0.000255223
11	73712513	UCP3	0.00428661	4.52e-05	0.3497	0.889556	0.990862
2	128631685	AMMECR1L	0.00434251	NA	0.6659	0.533541	0.0002219
12	31446744	FAM60A	0.004373	NA	NA	0.004373	NA
20	1424531	NSFL1C	0.00440919	0.777912	0.621	0.0292046	0.001025
22	41075523	MCHR1	0.00453453	0.00108197	0.0962893	0.776267	0.185564
17	7220846	NEURL4	0.00454386	0.27305	0.578393	0.000670739	0.142056
17	57232365	SKA2	0.00459384	0.1891	0.2704	0.000371236	0.8043
4	77476772	SHROOM3	0.00459675	0.0111641	0.133776	0.0966604	0.105847
12	117664509	NOS1	0.00459962	0.962216	0.340991	0.00507962	0.00917576
8	67341714	RRS1	0.00473087	0.108536	0.374359	0.0337847	0.0115635
1	92430266	BRDT	0.00475576	0.453594	0.002754	0.020015	0.6393
11	88911122	TYR	0.00479004	0.092455	NA	0.475357	0.002025
19	31038933	ZNF536	0.0048254	0.725262	0.04688	0.00825671	0.0580459
7	92953024	VPS50	0.00483105	0.7723	0.550823	0.778198	4.93e-05
15	33855175	RYR3	0.00486541	0.543213	0.0191405	0.033209	0.0477131
3	38207396	OXSR1	0.00486638	0.279196	0.7819	0.000415733	NA
14	94931052	SERPINA9	0.0048763	6.03e-05	0.682796	0.720566	0.556958
20	18471068	RBBP9	0.00492795	0.02469	NA	0.02363	NA
6	29454816	MAS1L	0.0049505	0.0130291	0.0205097	0.207661	0.303791
7	97941570	BAIAP2L1	0.00497496	0.2693	0.791243	0.00113214	0.07034
1	74715186	FPGT-TNNI3K;TNNI3K	0.00502902	0.000320057	0.21303	0.750732	0.3363
15	38786861	RASGRP1	0.00503208	NA	NA	0.00503208	NA
7	72717986	NSUN5	0.00506645	0.940753	0.717532	0.0686217	0.0003753
8	6371240	ANGPT2	0.00508499	0.02348	0.0555919	0.0226182	0.591693
22	32193632	DEPDC5	0.00509775	0.109133	0.173504	0.00113864	0.812938
20	35857025	RPN2	0.00511778	NA	NA	0.01998	0.03048
1	154184993	C1orf43	0.00513603	NA	0.3671	0.001085	0.2436
16	2282198	E4F1	0.00517121	0.572599	0.766482	0.000560631	0.0726
2	241974013	SNED1	0.00518178	0.00188561	0.0525136	0.372568	0.485529
12	6909315	CD4	0.00518496	0.602744	0.0405728	0.477733	0.00153443
19	53014422	ZNF578	0.00519143	0.694336	NA	0.000891427	NA
4	6599928	MAN2B2	0.00522045	0.171393	0.547471	0.745656	0.000258551
8	146017424	RPL8	0.00522443	NA	0.1741	0.0035808	NA
4	8022016	ABLIM2	0.00529645	0.121	0.357898	0.00232764	NA
15	75890934	SNUPN	0.00538283	0.117188	0.017319	0.967019	0.00960052
12	6981446	SPSB2	0.00538623	0.175046	NA	0.003687	NA
19	17212814	MYO9B	0.00542215	0.561087	0.271721	0.249666	0.000499841
14	74345884	PTGR2	0.00544405	0.3576	0.331	0.000881159	NA
14	21249869	RNASE6	0.005479	NA	NA	0.005479	NA
10	104486485	SFXN2	0.00552299	0.5581	0.450488	0.000308123	0.2517
3	149290675	WWTR1	0.00556602	0.2878	0.776579	0.737185	0.000119575
15	74632009	CYP11A1	0.00558702	0.856668	0.267474	0.763371	0.000113199
2	18112458	KCNS3	0.00560389	0.202215	NA	0.00333861	NA
17	26881438	PIGS	0.00563331	0.904662	0.0513118	0.223559	0.0019291
13	113825970	PROZ	0.00564876	0.688137	0.0152825	0.608587	0.00313939
11	119148990	CBL	0.00575326	0.7349	NA	0.000526168	0.2889
16	57147265	CPNE2	0.00576675	NA	NA	0.00576675	NA
6	36063793	MAPK14	0.00578384	0.000508973	0.8951	0.0677519	0.6718
15	75116809	LMAN1L	0.0057856	0.01723	0.1145	0.0570213	NA
2	120388412	CFAP221	0.0057922	0.794511	0.8945	2.97e-05	0.9843
7	142919509	TAS2R40	0.00579997	0.7722	NA	0.000156607	0.9331
2	131688828	ARHGEF4	0.00581455	0.133652	0.460501	0.00149618	0.22678
2	233735073	C2orf82	0.005832	NA	0.005832	NA	NA
1	156235800	SMG5	0.0058526	0.0490898	0.120278	0.00451619	0.790001
6	53135449	ELOVL5	0.00586137	0.7623	0.06674	0.00224723	NA
11	119180610	MCAM	0.005875	NA	NA	0.005875	NA
17	34247202	RDM1	0.00590101	NA	NA	0.00590101	NA
19	48624555	LIG1	0.00590588	0.788033	8.89e-05	0.51069	0.59598
13	20978318	CRYL1	0.005906	NA	NA	0.005906	NA
8	79598772	ZC2HC1A	0.00591128	0.000642606	0.249657	0.299098	0.4449
12	33529788	SYT10	0.00601506	NA	0.008771	0.0834287	NA
5	157102128	C5orf52	0.00608432	0.00332552	NA	0.222929	NA
5	178504110	ZNF354C	0.00610151	0.000869525	0.182068	0.759209	NA
17	40123938	CNP	0.00610937	0.4353	NA	0.00171108	NA
1	150483465	ECM1	0.00619212	0.8267	0.02765	0.002464	0.4033
14	23816670	SLC22A17	0.00620748	NA	0.112	0.289371	0.003789
7	123182267	NDUFA5	0.00623124	NA	NA	0.00623124	NA
2	163208877	GCA	0.0062452	0.274408	0.000749571	0.159879	0.698666
3	38035950	VILL	0.00626588	0.324764	0.394154	0.000274449	0.6569
18	9887176	TXNDC2	0.00627097	0.01738	NA	0.0441493	NA
19	47995358	NAPA	0.00630997	NA	NA	0.514142	0.001503
22	39760275	SYNGR1	0.00631335	0.7909	0.2041	0.884906	0.0001632
21	43733628	TFF3	0.00635252	0.3358	0.9488	0.3485	0.0002117
5	156770117	FNDC9	0.00635777	0.739718	0.194994	0.549781	0.000296745
19	15272378	NOTCH3	0.0064192	0.000186341	0.177761	0.784782	0.916981
6	90642251	BACH2	0.00643921	0.0207555	0.483883	0.00504254	0.472652
7	143088576	EPHA1	0.00645791	0.139793	0.117412	0.0022332	0.655581
1	40312919	TRIT1	0.00645997	0.0771268	0.865747	0.00159306	0.226
11	397045	PKP3	0.00648401	0.079337	0.19303	0.168639	0.00935494
5	55396075	ANKRD55	0.00652847	0.019848	0.0400372	0.0443204	0.6923
14	25043951	CTSG	0.00653818	NA	0.0463	0.01738	NA
8	6668746	XKR5	0.00656204	0.00321823	0.0953411	0.0882456	0.906721
9	36583642	MELK	0.0065864	0.0651584	0.377161	0.219167	0.00458089
1	31769528	SNRNP40	0.00659743	0.2222	0.001347	0.442696	NA
1	169777033	C1orf112	0.00663695	0.187684	0.287331	0.00149321	0.309561
1	43917098	HYI;HYI	0.006703	NA	NA	0.006703	NA
5	148610251	ABLIM3	0.00676706	0.266641	0.434443	0.65981	0.000334743
5	140782731	PCDHGA9	0.00677745	0.00323841	0.806564	0.133727	0.0734
1	167905024	MPC2	0.00679301	0.0261292	0.06583	0.64413	0.0232113
18	55222169	FECH	0.00679954	0.433823	0.00362902	0.0175148	0.933848
5	65892767	MAST4	0.0068414	0.46262	0.904156	0.000112106	0.553688
16	31097375	PRSS53	0.00690542	0.002137	0.2291	0.069115	0.776952
1	43296492	ERMAP	0.00691251	0.396687	0.868364	0.0127613	0.00598892
9	15422960	SNAPC3	0.00692351	0.00316038	0.687021	0.292867	0.04149
9	135975698	RALGDS	0.00693741	0.4087	0.634525	0.00018704	0.545387
6	154567884	IPCEF1;OPRM1	0.007002	NA	NA	0.007002	NA
9	132566551	TOR1B	0.0070775	0.121103	0.3415	0.00133107	0.493647
22	20800848	KLHL22	0.00708291	0.1574	0.592	0.001554	NA
1	47650744	PDZK1IP1	0.00709515	0.2482	0.00472422	0.0314443	0.739513
8	41161051	SFRP1	0.00710482	NA	0.4404	0.002009	NA
2	207169638	ZDBF2	0.00711248	0.176074	0.579373	0.000448648	0.597701
11	111946306	C11orf57	0.00713498	0.09395	NA	0.00946307	NA
8	125990008	ZNF572	0.00714966	0.0607	0.138	0.0249332	0.1319
5	990047	LOC100506688	0.007153	0.007153	NA	NA	NA
5	140250471	PCDHA11	0.00715862	NA	0.5192	0.00171884	NA
14	21963401	TOX4	0.00724247	0.443	0.4107	0.00161984	0.09511
19	45206676	CEACAM16	0.00725098	0.185643	0.2518	0.00150827	0.3982
17	45776034	TBKBP1	0.00726997	0.3798	NA	0.0790037	0.004986
6	136882715	MAP3K5	0.00729986	0.463573	0.0004035	0.803944	NA
20	23584368	CST9	0.00735054	NA	0.1422	0.0651932	0.0163625
4	153332910	FBXW7	0.00738405	0.006063	NA	0.1525	NA
19	36277957	ARHGAP33	0.00739574	0.278133	0.2889	0.00190235	NA
20	42885925	GDAP1L1	0.0074652	NA	0.08002	0.0117	NA
15	72690680	TMEM202	0.00747653	0.439916	0.00255084	0.0511597	0.509625
20	23669488	CST4	0.00755055	NA	NA	0.00755055	NA
1	228879176	RHOU	0.007575	NA	NA	0.007575	NA
6	153323570	MTRF1L	0.007618	NA	0.007618	NA	NA
19	50938483	MYBPC2	0.00769049	0.393677	0.945461	0.184856	0.000441711
10	50667120	ERCC6	0.00773459	0.610098	0.29414	0.000252988	0.674612
8	18393438	PSD3	0.00787112	0.885881	0.230672	0.000208734	0.735195
10	90524336	LIPN	0.00787854	0.38945	0.368242	0.125294	0.00174745
17	21318753	KCNJ12;KCNJ18	0.00787882	0.0319894	0.0838429	0.0862045	0.135812
11	134253984	B3GAT1	0.00790781	NA	NA	0.00790781	NA
5	176759170	LMAN2	0.0079294	0.01886	0.2747	0.770452	0.007935
14	23587898	CEBPE	0.00793297	0.02751	0.7874	0.0381311	0.03837
11	93103330	DEUP1	0.00797497	0.972347	NA	0.00103845	NA
14	81251592	CEP128	0.00797518	0.08607	0.644807	0.0934133	0.00615717
1	45166717	C1orf228	0.00798237	0.0321726	0.677796	0.0146532	0.100019
11	65647351	CTSW	0.00802482	0.627074	0.8072	0.00017551	0.362336
2	120003463	STEAP3	0.00808355	0.408046	0.62184	0.21325	0.00060078
9	135545995	GTF3C4	0.00819819	0.298354	0.91205	0.000161004	0.756268
12	72667286	TRHDE	0.00823104	0.001003	0.594	0.0761781	0.734
1	41512115	SCMH1	0.00826647	0.232827	0.0386935	0.0176272	0.211
19	7828177	CLEC4M	0.00833246	NA	NA	0.00833246	NA
1	16069525	TMEM82	0.00838056	0.191911	0.238058	0.819774	0.000911418
4	165961645	TRIM60	0.00840236	0.0166774	0.642828	0.0340521	0.093833
19	12786921	DHPS;DHPS	0.008421	0.008421	NA	NA	NA
20	44166646	EPPIN-WFDC6;WFDC6	0.008459	NA	NA	0.008459	NA
3	50645081	CISH	0.00847037	NA	0.270046	0.588286	0.001141
3	197803828	ANKRD18DP	0.008479	0.008479	NA	NA	NA
2	44079755	ABCG8	0.00849381	0.434703	0.177721	0.00063985	0.7032
19	49206286	FUT2	0.00850804	0.439989	0.776851	0.280799	0.000362994
9	135285840	CFAP77	0.00851758	0.179222	0.339713	0.0277598	0.0206449
20	44506208	ZSWIM3	0.00851798	0.546	NA	0.00199431	NA
3	142840775	CHST2	0.00853274	0.1194	0.110481	0.649	0.00408548
13	100909892	PCCA	0.008587	0.1204	0.796948	0.000417437	0.880771
22	30737736	SF3A1	0.00859005	NA	NA	0.00859005	NA
12	105568139	APPL2	0.00862702	0.138333	0.083152	0.00345583	0.893092
12	108128056	PRDM4	0.00864193	0.0006093	0.958	0.0728702	0.8366
9	120470884	TLR4	0.00868865	0.000230564	0.53283	0.968351	0.301319
13	106124937	DAOA	0.00869962	NA	NA	0.00869962	NA
2	48692676	PPP1R21	0.00872065	0.1637	0.8893	0.000328198	0.754
4	77272926	CCDC158	0.00877659	0.0981172	0.0748314	0.00527895	0.937549
20	61340732	NTSR1	0.00880545	0.186122	0.019944	0.230677	0.0426273
9	125391012	OR1B1	0.00887908	0.8893	0.2496	0.000866577	NA
17	19684338	ULK2	0.00894933	0.316974	0.630603	0.000262548	0.711
12	10958658	TAS2R8	0.00895602	0.899954	0.00342653	0.60774	0.0199299
11	89947246	CHORDC1	0.008973	NA	NA	0.008973	NA
12	109182653	SSH1	0.00898771	0.0608005	0.157088	0.240158	0.0163619
5	80736449	SSBP2	0.00912103	NA	0.3721	0.399682	0.001338
5	36217959	NADK2	0.00913453	NA	0.856101	0.0875458	0.00266
16	3274286	ZNF200	0.00917132	0.423718	0.1125	0.00642261	0.126
3	179424788	USP13	0.00923534	0.001248	0.766258	0.0664414	0.6129
19	2917494	ZNF57	0.00923697	0.0170063	0.9093	0.00273521	0.920905
16	4787935	C16orf71	0.00925664	0.813856	0.09773	0.00173241	0.2835
20	55048429	RTFDC1	0.00926155	NA	NA	0.00926155	NA
9	129854069	ANGPTL2	0.0092708	0.645414	0.001003	0.313777	NA
19	5693309	LONP1	0.00933232	0.987273	0.0223152	0.00589725	0.304017
4	57164441	KIAA1211	0.00935668	0.262334	0.649413	0.0112035	0.0207681
1	224371065	DEGS1	0.00939724	0.0803815	0.04674	0.0139059	0.7632
5	141974913	FGF1	0.00939734	0.1797	0.3901	0.119547	0.004758
12	48064044	RPAP3	0.009451	0.88636	0.6353	0.000369602	NA
1	53666438	CPT2	0.00945158	0.0130402	0.595425	0.0380016	0.1362
7	151791365	GALNT11	0.0094693	0.00304034	0.978588	0.0375486	0.360644
15	85657245	PDE8A	0.0094949	0.0177117	NA	0.0696394	NA
6	25420376	CARMIL1	0.00950435	0.282322	0.392553	0.00087958	0.415395
16	89246680	CDH15	0.00954701	0.217591	0.0729144	0.0054682	0.4696
2	172823030	HAT1	0.00954703	0.00954703	NA	NA	NA
7	99017705	ATP5J2-PTCD1;PTCD1	0.00956213	0.1059	0.533488	0.0032408	0.222992
8	48878875	MCM4	0.00965354	0.190308	0.000894375	0.785401	0.3094
8	55534041	RP1	0.00966308	0.00272069	0.0250206	0.632447	0.961991
12	123338616	HIP1R	0.00967873	0.561528	0.114646	0.581915	0.001108
6	42176643	MRPS10	0.00968928	0.5009	0.4015	0.00180997	0.1142
6	42153428	GUCA1B	0.00970874	NA	NA	0.00970874	NA
17	5009424	ZNF232	0.00977398	0.03567	NA	0.03575	NA
9	138903523	NACC2	0.00978914	0.02385	0.05424	0.227557	0.1432
17	76157199	C17orf99	0.00980204	0.0773	0.668	0.001546	0.529
17	61683711	TACO1	0.0098164	0.01406	NA	0.09115	NA
3	119306449	ADPRH	0.00982369	0.187	0.4459	0.00123117	0.4126
10	70048713	PBLD	0.00989488	0.03384	NA	0.0140744	0.4631
9	96021254	WNK2	0.00991475	0.0246505	0.976603	0.00823338	0.216406
11	5878609	OR52E8	0.0099455	0.0316244	0.0464916	0.1347	0.2175
17	35872409	DUSP14	0.00995649	NA	NA	0.4361	0.002987
19	19625992	TSSK6	0.00996625	NA	0.1242	0.0105	NA
19	10812828	QTRT1	0.00999541	0.3546	NA	0.000913466	0.6897
3	88202512	C3orf38	0.0100148	0.00149258	NA	0.878625	NA
22	31501206	SELENOM	0.01003	0.01003	NA	NA	NA
17	76420090	DNAH17	0.0101349	0.114177	0.49441	0.00899944	0.087
15	75498447	C15orf39	0.0102788	0.118052	0.934706	0.0796427	0.00512703
11	130750592	SNX19	0.0102812	0.277194	0.03561	0.00812905	0.5617
17	3514054	SHPK	0.0102975	0.310525	0.661	0.777131	0.000283171
5	121739541	SNCAIP	0.0103389	0.249598	0.531284	0.00049003	0.698919
10	104590500	CYP17A1	0.0103394	0.01796	0.4959	0.0261824	NA
5	176965939	FAM193B	0.0104023	0.5734	0.0734688	0.453732	0.002396
9	33240216	SPINK4	0.01041	0.0444638	0.461027	0.012115	0.1846
5	140683301	SLC25A2	0.0104228	0.102	NA	0.301631	0.007657
11	5373347	OR51B6	0.0104262	0.02918	0.441017	0.798838	0.004469
5	169015433	SPDL1	0.0104367	0.490088	0.0139151	0.0599078	0.112605
13	20763210	GJB2	0.0104653	0.852431	0.923131	0.281164	0.000208712
1	150550761	MCL1	0.0104751	0.0240205	0.2236	0.0441401	NA
11	10603483	MRVI1	0.010528	0.014964	0.0145487	0.655985	0.325993
17	18874794	FAM83G	0.0105305	0.0719081	0.0251255	0.0398825	0.646312
18	44260159	ST8SIA5	0.010617	0.00880427	NA	0.159311	NA
5	14601182	FAM105A	0.0106805	0.000164764	0.4368	0.963266	0.6849
16	5105306	C16orf89	0.0107023	0.142122	0.02129	0.015815	0.995
7	107302103	SLC26A4	0.0107378	0.540476	0.0117389	0.0114242	0.659877
6	169053866	SMOC2	0.0108811	0.1905	NA	0.0390794	0.03342
10	91198917	SLC16A12	0.0108951	0.0009783	0.6519	0.390755	NA
8	11629070	NEIL2	0.0108956	0.0187881	0.0195244	0.679396	NA
9	132591560	C9orf78	0.0109328	0.1959	0.5196	0.002459	NA
4	667099	ATP5I	0.0109349	0.002075	NA	0.699344	NA
17	64738819	PRKCA	0.0109683	0.6698	0.01492	0.02515	NA
7	24747872	DFNA5	0.0109717	0.3725	0.3004	0.00224698	NA
9	26995562	LRRC19	0.0109873	0.82034	0.0155401	0.407085	0.00951084
20	62632557	PRPF6	0.0110352	NA	NA	0.0110352	NA
13	113030751	SPACA7	0.0110634	0.1083	NA	0.013581	NA
10	104404416	TRIM8	0.0110705	NA	0.8661	0.00169946	NA
9	135271868	TTF1	0.0110735	NA	0.0965391	0.0110889	0.237644
16	22358636	CDR2	0.01108	NA	NA	0.01108	NA
17	43922409	SPPL2C	0.0110823	0.145864	0.0724379	0.334257	0.014141
11	123989320	VWA5A	0.0111022	0.895234	0.770476	0.479108	0.0001515
5	140306559	PCDHAC1	0.0111051	0.217869	0.4085	0.893953	0.0006295
6	160176479	WTAP	0.0111479	0.0405749	0.5824	0.00348826	0.6108
20	30053322	DEFB124	0.0111923	0.01385	0.1055	0.123252	0.2811
8	126021519	SQLE	0.0112093	0.5791	0.6541	0.364421	0.0003675
3	53324848	DCP1A	0.0112451	NA	0.103068	0.003641	0.6913
19	11916914	ZNF491	0.0112802	0.0624382	0.7733	0.114597	0.00924778
1	865625	SAMD11	0.0112981	0.01685	0.313	0.699239	0.0139054
11	62446179	UBXN1	0.0113628	0.6483	0.2625	0.00172335	0.17623
1	109315291	STXBP3	0.0113816	NA	NA	0.237051	0.006411
17	26976071	SDF2	0.0114225	0.0785	NA	0.01944	NA
7	102716226	ARMC10	0.0114409	0.2761	0.00319645	0.434678	0.136
7	123257776	ASB15	0.0114707	0.612183	0.602687	0.69484	0.000204235
9	131495722	ZER1	0.0115628	0.260981	0.0118509	0.0869048	NA
11	20869250	NELL1	0.0115804	0.335898	0.707163	0.73673	0.00030313
2	178534265	PDE11A	0.011674	0.00357659	0.0952059	0.471135	0.334339
6	24828449	RIPOR2	0.0116879	0.361347	0.606648	0.000679972	0.360433
9	136531857	SARDH	0.0117312	0.433179	0.559679	0.313974	0.000709384
16	320522	RGS11	0.0117525	0.00044665	0.218986	0.91153	0.607168
7	156447411	RNF32	0.0118591	0.5485	NA	0.00290536	NA
2	9593064	CPSF3	0.0118792	NA	0.02889	0.479539	0.02008
12	48240126	VDR	0.0119001	0.138889	0.0909575	0.380014	0.0114711
6	76369044	SENP6	0.0119297	0.3262	0.448159	0.0255339	0.0148033
19	10798066	ILF3	0.0119447	0.1379	0.2804	0.00724491	NA
9	139743999	PHPT1	0.011973	0.9721	0.5525	0.00047715	0.2167
1	167064177	DUSP27	0.0119968	0.996781	0.331131	0.000292053	0.577675
7	56155414	PHKG1	0.0120664	0.1393	0.04154	0.0242142	0.4006
11	85406316	SYTL2	0.0120951	0.114161	0.384367	0.0362941	0.0353602
18	56376637	MALT1	0.0121077	0.714423	0.1671	0.00238751	NA
10	11047400	CELF2	0.012127	0.01761	NA	0.09286	NA
15	51503148	CYP19A1	0.0121966	0.853	0.6481	0.000520402	NA
18	12262897	CIDEA	0.0122035	0.988658	0.0187844	0.00680867	0.450865
8	145722620	PPP1R16A	0.0122122	NA	NA	0.0122122	NA
2	61415378	USP34	0.0122605	0.32714	0.242247	0.0476465	0.0151955
4	75040404	MTHFD2L	0.012264	0.795656	0.658382	0.0160335	0.00683398
10	63445837	C10orf107	0.0122846	0.568222	0.1379	0.003368	0.218
12	122332697	PSMD9	0.0123075	0.00163108	0.0907302	0.537153	0.7256
9	32457245	DDX58	0.0123178	0.505917	NA	0.0199128	0.02892
5	82786067	VCAN	0.0123396	0.61055	0.226365	0.00185017	0.226381
17	8273654	KRBA2	0.0123821	0.3423	0.00196722	0.105372	0.8197
4	7788025	AFAP1	0.012393	0.51751	0.9977	0.00107823	0.1046
19	56693562	GALP	0.0124204	0.2991	0.766	0.003117	0.08179
7	142880936	TAS2R39	0.0124224	0.9263	NA	0.0011659	0.2727
6	31556992	NCR3	0.0125882	0.648343	0.323131	0.818279	0.000347079
3	142769891	U2SURP	0.0126	0.0126	NA	NA	NA
10	75896420	AP3M1	0.0126876	0.00909038	0.560201	0.0130931	0.9021
15	25925284	ATP10A	0.012695	0.0272896	0.246406	0.074417	0.120296
3	146251266	PLSCR1	0.0127216	0.4272	0.4525	0.6649	0.0004697
4	110890274	EGF	0.0127929	0.62847	0.191751	0.249317	0.00202488
16	839027	CHTF18	0.0128067	0.469351	0.250625	0.000614607	0.842748
4	96761363	PDHA2	0.0128291	0.966165	0.815	0.70842	0.000109488
1	43616475	FAM183A	0.0128863	0.708021	0.3588	0.0009622	0.2514
2	203650725	ICA1L	0.0129283	0.871604	0.017406	0.736745	0.00552262
8	27634402	ESCO2	0.0129487	0.730337	0.4322	0.00139694	0.140294
17	7637789	DNAH2	0.0129687	0.428673	0.0453997	0.909911	0.00350084
9	139847446	LCN12	0.0130603	0.991018	0.3754	0.00157257	0.107
21	34922515	SON	0.0131254	0.864912	0.808708	0.00481061	0.0187321
1	117944822	MAN1A2	0.0131257	0.006587	NA	0.272059	NA
17	40841014	CNTNAP1	0.0131581	0.9229	0.6153	0.00608538	0.0183027
3	52867393	MUSTN1;TMEM110-MUSTN1	0.0132679	0.7542	0.108403	0.22928	0.003413
5	137722272	KDM3B	0.0132978	0.697909	0.706853	0.00019604	0.6636
15	72987530	BBS4	0.0133716	NA	0.3282	0.00179089	0.5505
19	55879685	IL11	0.0133722	0.249202	0.000806	0.565549	0.569345
1	93965129	FNBP1L	0.0134114	0.006306	NA	0.291359	NA
5	139930460	SRA1	0.0134625	0.389	0.9539	0.00102042	0.1724
15	64966927	ZNF609	0.0135336	0.03144	0.696996	0.295793	0.0101445
11	124967615	TMEM218	0.0135586	0.000923011	0.5388	0.165636	0.8003
10	129676579	CLRN3	0.0136552	0.143152	0.430555	0.691069	0.001563
3	183774829	HTR3C	0.0137219	0.550233	0.0220462	0.724157	0.00763
1	155205529	GBA	0.0137602	0.00221592	0.09471	0.3524	0.90976
3	45800505	SLC6A20	0.0137719	0.3009	0.280251	0.00133933	0.59644
5	138378394	SIL1	0.0137742	0.0008631	0.4337	0.898653	0.2003
5	96314935	LNPEP	0.0137767	0.411928	NA	0.0046014	NA
2	127447837	GYPC	0.013798	0.487818	NA	0.00389254	NA
19	36940675	ZNF566	0.0138006	0.2361	0.0127528	0.570781	0.03931
6	108029194	SCML4	0.0138363	0.0069561	NA	0.273855	NA
7	140710396	MRPS33	0.0138723	NA	NA	0.606	0.003153
3	168806803	MECOM	0.0138981	0.0011138	0.379483	0.459309	0.3514
20	14306361	FLRT3	0.0139304	NA	NA	0.0139304	NA
10	99125924	RRP12	0.0139567	0.217124	0.92835	0.00103106	0.330166
10	118427779	C10orf82	0.0139838	0.2263	NA	0.008522	NA
11	125765363	PUS3	0.0140133	0.705468	0.6001	0.00197402	0.0825692
3	167747707	GOLIM4	0.0141356	0.05052	0.8146	0.756593	0.002243
19	51506384	KLK9	0.01414	NA	NA	0.01414	NA
4	70723299	SULT1E1	0.0141681	NA	0.5847	0.01735	0.03435
6	14131844	CD83	0.0141819	NA	NA	0.0141819	NA
11	85347215	TMEM126B	0.0142017	0.1167	0.1576	0.211506	0.01807
12	11149689	TAS2R20	0.0142498	0.6059	0.821	0.0007057	NA
17	74003285	EVPL	0.0142618	0.0365082	0.0434534	0.0891751	0.499797
20	29976830	DEFB119	0.0143095	0.892731	0.0321	0.233847	0.0106
16	68358698	PRMT7	0.0143294	0.2647	0.4942	0.00741322	0.07339
12	53044156	KRT2	0.0143405	0.3659	0.0774305	0.0273309	0.09201
2	70074757	GMCL1	0.0143446	NA	0.04686	0.04239	NA
16	46633744	SHCBP1	0.0143495	0.113053	0.194079	0.397567	0.00817476
12	53819697	AMHR2	0.0143588	0.1317	NA	0.0151	NA
1	155920126	ARHGEF2	0.01445	NA	NA	0.01445	NA
11	48131618	PTPRJ	0.0144834	0.465568	0.533341	0.000892508	0.325941
14	21161784	ANG	0.0145299	0.16949	0.01031	0.0438449	0.947
2	150071156	LYPD6B	0.0146165	0.003168	0.922	0.05338	0.4692
12	52283225	ANKRD33	0.0147198	0.330916	0.00139931	0.185234	0.861284
1	55451968	TMEM61	0.0147353	0.2942	0.9634	0.796056	0.0003279
3	12422981	PPARG	0.01474	0.01474	NA	NA	NA
6	26104382	HIST1H4C	0.0147404	0.0147404	NA	NA	NA
15	65208099	ANKDD1A	0.0147597	0.00257721	NA	0.235511	0.605073
9	19058598	HAUS6	0.0147654	0.6234	0.9657	0.00029547	0.4171
13	107211797	ARGLU1	0.01481	NA	NA	0.01481	NA
3	72799481	SHQ1	0.0148297	0.382015	0.01487	0.949421	0.01384
22	20043504	TANGO2	0.014831	NA	0.02301	0.14884	0.1079
9	95610312	ZNF484	0.0148322	0.6821	0.264813	0.423425	0.000976166
1	52850899	ORC1	0.0148445	0.32256	0.180786	0.00396915	0.322936
9	114337092	PTGR1	0.0148626	0.647923	0.130492	0.00265576	0.333447
2	165765194	SLC38A11	0.015054	0.238799	0.8636	0.0147782	0.025008
3	155649576	GMPS	0.0151162	NA	0.1823	0.01158	NA
12	93196332	EEA1	0.0151576	0.319817	0.343161	0.000808747	0.86691
1	197887095	LHX9	0.01517	NA	NA	0.01517	NA
17	10351368	MYH4	0.0152041	0.346621	0.00276263	0.132227	0.610296
3	139237264	RBP1	0.0152466	NA	0.005695	0.3744	NA
20	56078504	CTCFL	0.0152834	0.07787	0.551717	0.0176814	0.102465
10	76789077	KAT6B	0.015301	0.213837	0.948959	0.656563	0.000585151
16	89288548	ZNF778	0.0153272	0.617888	0.221081	0.997193	0.000573675
11	18159150	MRGPRX3	0.015413	0.1683	0.006468	0.3567	NA
15	101529012	LRRK1	0.0154266	0.190455	0.706399	0.0544546	0.0107631
16	701217	WDR90	0.015447	0.599283	0.204531	0.0829896	0.00776608
1	35227006	GJB4	0.0155033	0.644385	0.636578	0.000857792	0.22565
2	74902022	SEMA4F	0.0155444	0.115442	0.403121	0.00274828	0.623091
18	22048821	HRH4	0.0155586	NA	0.8885	0.002457	NA
16	90066866	AFG3L1P	0.01556	0.01556	NA	NA	NA
2	202352363	C2CD6	0.0155742	0.0605019	0.00744869	0.266939	0.664221
1	21053559	SH2D5	0.0156546	0.002849	0.1328	0.444359	0.4787
17	79287710	TMEM105	0.015667	0.05525	0.2866	0.609722	0.008345
2	11720838	GREB1	0.015726	0.350889	0.127586	0.00190876	0.947803
1	11807600	AGTRAP	0.0157613	0.2383	0.5557	0.0123	0.04988
11	13402787	ARNTL	0.01588	NA	NA	0.01588	NA
1	26774050	DHDDS	0.01598	NA	NA	0.01598	NA
9	37501807	POLR1E	0.0159839	NA	0.00659	0.341825	NA
17	60742265	MRC2	0.0160405	0.525676	0.622752	0.418011	0.000608424
1	198671653	PTPRC	0.0161557	0.222526	0.311163	0.00764467	0.158867
19	51645726	SIGLEC7	0.0161576	0.6595	0.000532974	0.709621	0.3372
19	15533930	WIZ	0.0161676	0.477633	NA	0.00477941	NA
12	39973395	ABCD2	0.0161765	0.08111	0.00942279	0.5407	NA
3	9862274	ARPC4-TTLL3;TTLL3	0.0161932	0.0498535	0.0707664	0.0350959	0.681379
12	7354399	PEX5	0.0162478	0.486733	0.695767	0.0012272	NA
19	620005	POLRMT	0.0162582	0.0327655	0.137303	0.677919	0.0278175
10	17275861	VIM	0.0163376	0.9141	NA	0.00252792	NA
1	247007113	AHCTF1	0.0163718	0.531407	0.378096	0.482393	0.000883867
12	68689113	MDM1	0.0163735	0.5932	0.181825	0.00389167	NA
9	2635545	VLDLR	0.0164015	0.136219	0.0196451	0.0598359	0.536366
3	51895692	IQCF2	0.016418	NA	NA	0.016418	NA
15	76016567	ODF3L1	0.0165139	0.938951	0.95982	0.963071	9.99e-05
10	116595381	FAM160B1	0.0165484	0.580008	NA	0.004044	NA
4	156135155	NPY2R	0.0165737	NA	0.7242	0.08839	0.006661
14	37132525	PAX9	0.016601	0.0332124	NA	0.0708842	NA
5	109756436	TMEM232	0.0166397	0.0313297	0.605582	0.00683459	0.675805
15	85164049	ZSCAN2	0.0166932	0.0400382	0.222797	0.0577195	0.170964
3	37559073	ITGA9	0.0167075	0.0128946	0.0743301	0.37266	0.246742
3	52771577	NEK4	0.0167136	0.166596	NA	0.0142432	NA
17	27067552	NEK8	0.0167776	0.7279	0.678087	0.000877608	NA
7	76885696	CCDC146	0.0167934	0.0334	0.209817	0.177035	0.0715478
20	19263855	LOC100130264	0.01681	0.01681	NA	NA	NA
15	79177383	MORF4L1	0.0169388	0.7267	0.1017	0.005934	NA
13	42875089	AKAP11	0.0169923	0.699014	0.347292	0.00264018	0.140792
3	113172548	SPICE1	0.0170391	0.00131192	0.0804171	0.983635	0.872916
9	35236570	UNC13B	0.0170595	0.0638805	0.0758666	0.0317937	0.588882
13	99449489	DOCK9	0.0170773	0.00714416	0.154122	0.0846484	0.974964
11	44931280	TSPAN18	0.01717	NA	NA	0.01717	NA
3	196792663	DLG1	0.0171739	0.00297747	0.560302	0.0967762	0.5673
3	119526176	NR1I2	0.0173476	0.1682	0.4291	0.3224	0.003992
17	78968905	CHMP6	0.01737	0.01737	NA	NA	NA
17	3912197	ZZEF1	0.0173987	0.864155	0.275636	0.00056768	0.689804
1	223718170	CAPN8	0.0174114	0.180309	0.0190247	0.0359819	0.756457
5	71740098	ZNF366	0.017561	0.642714	0.560683	0.000918151	0.2856
17	40651060	ATP6V0A1	0.017579	0.7863	0.349674	0.739311	0.000465534
4	115898360	NDST4	0.0176237	0.2731	0.247901	0.0026151	0.5364
15	42438355	PLA2G4F	0.0176323	0.000351381	0.943445	0.287125	0.998401
9	3225104	RFX3	0.0176356	0.0511327	0.0527567	0.357528	0.09856
2	74757348	HTRA2	0.0177418	0.8106	0.760738	0.344573	0.000451147
12	126138442	TMEM132B	0.0178013	0.198414	0.983164	0.542312	0.000910404
5	112769530	TSSK1B	0.0179144	0.0205702	0.182525	0.761637	0.0339805
2	207310170	ADAM23	0.0179216	0.0509551	0.384534	0.304163	0.0163137
5	140864784	PCDHGC4	0.0180309	0.00119655	0.614267	0.143698	0.928427
6	31914017	CFB	0.0180779	0.00122551	0.655628	0.622654	0.196722
1	156212360	BGLAP;PMF1-BGLAP	0.018085	0.2327	0.005148	0.891839	0.09217
16	31405563	ITGAD	0.0182358	0.00538573	NA	0.487751	NA
1	11907430	NPPA	0.01829	NA	0.3544	0.007438	NA
11	118235854	UBE4A	0.0183441	NA	NA	0.0183441	NA
11	48510435	OR4A47	0.01838	0.01838	NA	NA	NA
3	121575986	EAF2	0.0184769	0.6768	0.00165721	0.588524	0.153739
1	231471673	EXOC8	0.0184926	0.94614	0.2464	0.488704	0.000891784
3	187446313	BCL6	0.0185161	0.04171	0.09595	0.9554	0.02662
12	12509879	LOH12CR2	0.01853	0.01853	NA	NA	NA
2	24431123	ITSN2	0.0185368	0.684043	0.423686	0.000353719	0.994429
9	91083288	SPIN1	0.0185666	0.2281	0.246	0.9201	0.001979
1	153984776	NUP210L	0.0186238	0.286445	0.0549287	0.0067191	0.970658
2	152276870	RIF1	0.0186661	0.0504697	0.0373328	0.0811338	0.673409
14	24040436	JPH4	0.0187023	NA	NA	0.0187023	NA
5	42800866	SELENOP	0.0187062	0.723677	0.00559439	0.0368731	0.691681
1	43804305	MPL	0.0187656	0.895741	0.3461	0.000441829	0.7572
18	47113165	LIPG	0.0188469	0.618	0.525	0.00155207	NA
10	117823928	GFRA1	0.0189135	NA	0.2264	0.00299044	0.7472
18	29046607	DSG3	0.0189822	0.0445438	0.369675	0.0084875	0.754175
12	1702470	FBXL14	0.0189915	0.192499	0.00202358	0.967542	0.27986
8	26481822	DPYSL2	0.0190381	0.0104626	0.197227	0.0818541	0.62663
4	56762938	EXOC1	0.0190889	NA	0.3425	0.62861	0.002378
1	27250580	NUDC	0.0191084	NA	0.2981	0.0886475	0.0194
19	57333026	PEG3;ZIM2	0.0191181	0.12886	0.798796	0.668234	0.00154788
5	89913740	ADGRV1	0.0191467	0.0075453	0.543681	0.423379	0.0614304
13	42761201	DGKH	0.0191613	0.211071	0.287039	0.625833	0.00281688
18	12464867	SPIRE1	0.019189	0.3478	0.01519	0.0975699	NA
1	8384785	SLC45A1	0.0191928	0.902625	NA	0.000638939	0.894023
14	51378885	PYGL	0.0192065	0.982496	0.586151	0.000282972	0.657591
12	1902879	CACNA2D4	0.0192852	0.0812747	0.375601	0.00586957	0.601521
12	113624661	RITA1	0.0193149	0.353731	0.9204	0.00043734	0.7586
11	65307727	LTBP3	0.0194955	0.822	0.6261	0.953569	0.000223
15	78582044	WDR61	0.01965	0.01965	NA	NA	NA
17	18022937	MYO15A	0.0196965	0.172717	0.194104	0.205064	0.0161507
10	71874784	AIFM2	0.0197143	0.444543	0.50562	0.00484058	0.102181
5	40764876	PRKAA1	0.01972	NA	NA	NA	0.01972
13	21306070	EEF1AKMT1	0.0197669	0.1426	0.08525	0.04407	NA
11	46625172	HARBI1	0.0197921	0.5834	0.1877	0.0159767	0.0639
9	134381551	POMT1	0.0197928	0.0006975	0.6451	0.451592	0.5502
10	55566831	PCDH15	0.0198349	0.208794	0.0503357	0.0772788	0.138066
1	154991066	DCST2	0.0198988	0.00767328	0.043819	0.37988	0.8819
9	33794824	PRSS3	0.0199038	0.692728	0.6679	0.5327	0.0004572
14	90755015	NRDE2	0.0199199	0.0117191	0.171768	0.281142	0.199342
10	102051099	PKD2L1	0.019924	0.00368926	0.80488	0.0664269	0.572099
11	56000020	OR5T2	0.0199477	0.1194	0.009664	0.801645	0.1222
19	50247641	TSKS	0.0199715	NA	0.631637	0.00462558	NA
7	116770651	ST7	0.0199978	NA	0.4506	0.003985	0.3029
16	87741998	KLHDC4	0.0200191	0.0214288	0.199853	0.0402641	0.658836
1	68171235	GNG12	0.0200577	0.003302	NA	0.8893	NA
2	102476221	MAP4K4	0.0201553	0.220038	0.199509	0.00416509	0.6273
20	53171505	DOK5	0.0201648	NA	0.01231	0.240036	NA
3	38080978	DLEC1	0.0202021	0.700996	0.98684	0.125215	0.00132851
17	1673182	SERPINF1	0.0202031	0.512925	0.0543576	0.00979729	0.4213
2	209025577	CRYGA	0.020209	0.43018	0.04022	0.00977071	0.681038
20	62187669	FNDC11	0.0202497	0.109653	0.009169	0.54986	NA
11	3849236	RHOG	0.0202539	0.7807	0.7249	0.000223815	0.9118
19	10220614	PPAN;PPAN-P2RY11	0.0202676	0.159979	0.507501	0.00788251	0.180634
1	163117163	RGS5	0.0203339	0.9815	NA	0.03387	0.01672
17	8006708	ALOXE3	0.0203474	0.19488	0.671423	0.796114	0.00111593
15	101814816	SELENOS	0.0203897	0.0408712	0.2811	0.994885	0.0102
16	75663379	KARS	0.0204161	0.219778	0.979561	0.000702923	0.771829
3	49137043	QARS	0.0204374	0.150408	0.0447657	0.22083	0.07867
17	31260307	TMEM98	0.02047	NA	NA	0.02047	NA
1	161141673	B4GALT3	0.0204888	0.281165	0.8228	0.0061461	0.08256
5	150028639	SYNPO	0.0205934	0.458728	0.847651	0.475341	0.000639693
16	28986603	SPNS1	0.0205952	0.488122	0.3769	0.000724726	0.8869
12	6941010	P3H3	0.0206306	0.808988	0.677802	0.362689	0.000596046
11	1901454	LSP1	0.0206672	0.927151	0.02767	0.02213	NA
5	154320697	MRPL22	0.0206836	0.66308	0.2206	0.00388525	NA
6	28472253	GPX6	0.0207092	0.474978	0.001783	0.274561	0.512542
1	109707214	KIAA1324	0.0207208	0.977902	0.216818	0.646204	0.000870517
7	20418829	ITGB8	0.0208088	NA	0.02262	0.920834	0.0275
3	120347344	HGD	0.0208195	0.0090872	NA	0.337577	NA
3	49947766	MON1A	0.0208308	0.0116	0.3897	0.882266	0.03013
20	62172283	SRMS	0.0208502	0.205912	0.495721	0.0539915	0.0218331
18	9950508	VAPA	0.0208714	0.002608	0.587051	0.3756	NA
16	30723222	SRCAP	0.0209666	0.793846	0.650779	0.380442	0.00061705
21	35893925	RCAN1	0.0210278	0.0567181	0.005111	0.666384	0.6304
16	812699	MSLN	0.0211301	0.836469	0.00992794	0.0649495	0.227335
3	122296663	PARP15	0.0211834	0.474858	0.00204568	0.603548	NA
6	31733544	VWA7	0.0211848	0.856758	0.368536	0.760668	0.000512397
1	26308964	PAFAH2	0.0212437	0.1683	0.725444	0.00803744	0.125905
6	33281504	TAPBP	0.0213353	0.7314	0.3815	0.00109285	0.407646
11	119043671	NLRX1	0.0213548	0.338574	0.195729	0.880694	0.00213265
12	96370247	HAL	0.0213955	0.600253	0.0298717	0.690625	0.0100784
10	23248052	ARMC3	0.0213967	0.783144	0.07935	0.00955885	NA
19	55325194	KIR2DL4	0.0214024	0.0214024	NA	NA	NA
9	129831582	RALGPS1	0.0214094	NA	0.0378445	0.865569	0.0181479
19	1244381	ATP5D	0.02143	NA	NA	0.02143	NA
3	122459434	HSPBAP1	0.0214345	0.01174	NA	0.270041	0.1878
6	116599896	TSPYL1	0.0214787	0.938627	0.004882	0.0285792	0.958235
1	3389757	ARHGEF16	0.0214929	0.8046	0.288237	0.0101912	0.0531455
2	135738715	MAP3K19	0.0214943	0.000743278	0.518932	0.690987	0.471334
17	37922198	IKZF3	0.0215187	0.657432	0.04764	0.00656747	0.6117
7	117351826	CTTNBP2	0.0215856	0.648717	0.129595	0.00233954	0.642529
6	32797726	TAP2	0.0215878	0.161188	0.555838	0.478418	0.00294878
12	75442007	KCNC2	0.02168	NA	NA	0.02168	NA
3	112724661	NEPRO	0.0217531	0.655636	0.0105805	0.960578	0.0191745
19	40901711	PRX	0.0218177	0.325108	0.527652	0.234059	0.0031956
1	247751897	OR2G2	0.0218828	NA	NA	0.0218828	NA
10	20357145	PLXDC2	0.02206	0.0412541	0.392758	0.0137361	0.5856
12	56142670	GDF11	0.0220784	0.9966	0.7444	0.1066	0.00165
1	183529339	NCF2	0.0221527	0.271707	0.58647	0.00372538	0.220864
8	1616675	DLGAP2	0.0221884	0.3419	0.766857	0.542763	0.000923438
7	73753191	CLIP2	0.0222499	0.0345933	0.781843	0.327151	0.01491
17	48460399	LRRC59	0.02225	NA	NA	0.02225	NA
10	104210861	C10orf95	0.02227	NA	NA	0.02227	NA
5	149495360	PDGFRB	0.0222933	0.324722	0.952607	0.00204358	0.209277
2	15735621	DDX1	0.022296	NA	NA	0.022296	NA
16	69681107	NFAT5	0.0224046	0.970828	0.778917	0.000480221	0.366889
2	121991702	TFCP2L1	0.0224048	0.23028	0.40635	0.00397946	0.357796
1	155030364	ADAM15	0.0224143	0.344559	0.335367	0.316777	0.003642
7	107591763	LAMB1	0.0224275	0.0347677	0.346971	0.0768292	0.143961
1	197297974	CRB1	0.022461	0.281924	0.698984	0.00858988	0.0789902
1	59787270	FGGY	0.0225176	0.0916492	0.751627	0.0092182	NA
15	39544380	C15orf54	0.0225438	NA	0.1261	0.0267094	NA
6	40360591	LRFN2	0.0225472	0.1988	0.528796	0.00223849	0.5713
22	45681971	UPK3A	0.0225633	0.00350554	0.52162	0.199773	0.3684
2	119699906	MARCO	0.0226778	0.2228	0.948867	0.000780952	0.821
2	219505465	ZNF142	0.0227236	0.0387214	0.0837051	0.0454799	0.922165
5	93489746	KIAA0825	0.0227386	0.825656	0.0218555	0.127045	0.05935
14	24901219	KHNYN	0.022886	0.2278	NA	0.0150494	NA
11	129722427	TMEM45B	0.022887	0.00542707	NA	0.631727	NA
17	4675275	TM4SF5	0.0230158	NA	NA	0.0230158	NA
17	29761093	RAB11FIP4	0.023035	NA	NA	0.023035	NA
8	117950524	AARD	0.0231009	NA	0.05166	0.2945	0.04316
8	124094998	TBC1D31	0.0231328	0.241995	0.917152	0.762414	0.000823976
11	126174015	DCPS	0.0232131	0.028246	0.129647	0.0542409	0.705425
16	88876158	APRT	0.0232792	0.2992	NA	0.01169	NA
11	94861898	ENDOD1	0.023287	0.001817	NA	0.847335	0.431
14	101195335	DLK1	0.0233498	0.711678	0.677083	0.960129	0.0003054
5	140730489	PCDHGB1	0.0233684	0.8105	0.0351065	0.0137962	0.360344
15	45431333	DUOX1	0.0234563	0.117399	0.18746	0.0733135	0.0881414
11	62105546	ASRGL1	0.0234647	NA	NA	0.0234647	NA
1	6324747	ACOT7	0.0234701	0.0310571	0.2698	0.08001	NA
12	48534652	PFKM	0.0235521	0.207	0.0150072	0.4922	0.09355
11	73686548	UCP2	0.0235735	0.004518	NA	0.78569	NA
8	121466092	MTBP	0.0235772	0.359	0.788009	0.28176	0.00179726
5	175926081	FAF2	0.02364	NA	NA	0.02364	NA
11	55761182	OR5F1	0.0237286	0.19623	0.100516	0.31078	0.0235843
2	175962173	ATF2	0.0237474	0.2146	0.116571	0.0272154	NA
1	155252613	HCN3	0.0237509	0.325671	0.097566	0.835051	0.0054559
1	160607318	SLAMF1	0.0238177	0.02672	NA	0.134472	NA
13	33628235	KL	0.0238313	0.6485	0.286652	0.000825152	0.948309
6	132636774	MOXD1	0.0238527	0.5052	NA	0.00712453	NA
1	46032296	AKR1A1	0.0238689	0.558438	0.587457	0.468134	0.0009493
17	7077122	ASGR1	0.0239	NA	NA	0.0239	NA
14	105958536	C14orf80	0.0239031	0.343427	0.124696	0.70284	0.00485362
15	74277170	STOML1	0.0239207	NA	0.1048	0.03446	NA
6	29911183	HLA-A	0.0239696	0.7575	NA	0.004779	NA
15	90610546	ZNF710	0.0240062	0.63581	0.1833	0.00592548	NA
1	100459132	SLC35A3	0.0240301	NA	0.6494	0.0055911	NA
9	116930574	COL27A1	0.0240305	0.00816278	0.176833	0.115738	0.881097
15	39885869	THBS1	0.0240896	0.116	0.1593	0.0375419	NA
1	162557419	UAP1	0.024141	0.244335	0.007169	0.789048	0.1072
11	60739372	CD6	0.0241611	NA	NA	0.0241611	NA
3	119155746	TMEM39A	0.0242231	NA	NA	0.0242231	NA
6	31747510	VARS	0.0242248	0.529467	0.321067	0.724127	0.0012096
3	127395188	ABTB1	0.0242265	0.478532	0.000740857	0.469392	0.894851
16	57596371	ADGRG5	0.0242351	0.176627	NA	0.0045038	0.879
6	32814909	TAP1	0.0242947	0.790943	0.0896257	0.844507	0.00249744
11	71800166	LRTOMT	0.024301	0.0682151	0.2837	0.253062	0.03054
16	1584377	TMEM204	0.02446	NA	NA	0.02446	NA
17	41139295	RUNDC1	0.0244748	NA	0.351757	0.0105475	NA
11	64074743	ESRRA	0.02449	0.02449	NA	NA	NA
6	20486920	E2F3	0.0245471	0.727069	0.4794	0.000759169	0.573416
14	102689187	WDR20	0.0245633	0.1018	NA	0.789961	0.00885
5	79949873	DHFR	0.02466	0.02466	NA	NA	NA
1	120378772	NBPF7	0.0246772	0.2125	NA	0.01763	NA
9	107533159	NIPSNAP3B	0.0247303	0.499682	0.462823	0.41503	0.00159773
19	58967625	ZNF324B	0.0247767	0.09315	NA	0.04041	NA
9	84605749	SPATA31D1	0.0247849	0.116976	0.236335	0.287292	0.0193692
6	99885246	USP45	0.0248958	0.730608	0.328583	0.00181767	0.3548
3	27418257	SLC4A7	0.0249849	0.0111127	NA	0.342087	NA
14	90429595	TDP1	0.0249957	0.5554	NA	0.00684812	NA
3	39374151	CCR8	0.0250165	0.02292	0.1249	0.254658	NA
1	12907457	HNRNPCL1;HNRNPCL3;HNRNPCL4	0.0250654	0.0250654	NA	NA	NA
1	8073700	ERRFI1	0.0250677	0.005388	0.653	0.20776	NA
1	62979223	DOCK7	0.0250928	0.374149	0.707288	0.00178315	0.331813
17	41365196	TMEM106A	0.0251016	0.001125	NA	0.710476	0.916165
11	5988913	OR56A5	0.0251039	0.0972042	0.02314	0.325595	NA
5	89769728	MBLAC2	0.025106	NA	0.114	0.008731	0.73588
12	26493117	ITPR2	0.0252151	0.975212	0.000196225	0.849119	0.970327
16	20750372	THUMPD1	0.0252173	0.00214723	0.3801	0.902662	NA
1	209964095	IRF6	0.0252436	NA	NA	0.0252436	NA
9	5656610	RIC1	0.0253062	0.910071	0.493177	0.00125154	0.282135
20	3147403	LZTS3	0.0254033	0.3474	0.09166	0.0233611	NA
19	3381971	NFIC	0.0254037	0.189566	0.101134	0.0248643	0.3343
7	84629063	SEMA3D	0.0254122	0.654147	0.761512	0.294403	0.00108713
1	94996062	F3	0.0254443	0.0150322	0.0214019	0.531694	0.933739
7	37947175	SFRP4	0.0254765	0.275647	0.3905	0.006937	NA
3	138176414	ESYT3	0.0254898	0.393221	0.147406	0.0894993	0.0308672
3	45127515	CDCP1	0.0255039	0.710616	0.860726	0.000749022	0.3498
1	54520144	TCEANC2	0.0255508	0.6327	0.6507	0.00103798	0.376
11	101786141	CEP126	0.0255711	0.131053	0.339961	0.00372004	0.97057
14	64884644	MTHFD1	0.025576	0.1631	0.503619	0.00233832	0.837741
5	151771817	NMUR2	0.0255824	0.0713667	0.342591	0.0101169	0.650736
14	21467650	SLC39A2	0.0256119	0.0628936	0.09082	0.0297338	0.9493
1	53326421	ZYG11A	0.0258031	0.0323625	0.760533	0.57211	0.0115725
1	17634718	PADI4	0.0258396	0.613395	0.51486	0.000656069	0.788069
16	68772239	CDH1	0.0258533	0.396366	0.0296438	0.0339146	0.410068
4	54344855	LNX1	0.0258643	0.891992	0.000669363	0.914977	0.2993
11	65365830	MAP3K11	0.0259201	0.007683	0.4947	0.200977	NA
7	75894731	SRRM3	0.0260156	0.2574	0.1391	0.1569	0.02935
17	73234798	GGA3	0.0260717	0.142679	0.0424988	0.0316763	0.861066
1	94643581	ARHGAP29	0.0260766	0.473399	0.0553823	0.00819984	0.769522
12	47471980	AMIGO2	0.0260867	0.1886	NA	0.0212097	NA
6	29523787	UBD	0.02613	NA	NA	0.02613	NA
19	2290767	LINGO3	0.0262459	0.2579	0.1292	0.0233054	NA
21	35821559	KCNE1;KCNE1B	0.0263139	0.0263139	NA	NA	NA
17	18138296	LLGL1	0.0263835	0.698566	0.511155	0.0918061	0.00513186
11	105009653	CARD18	0.0264306	0.2156	NA	0.0188429	NA
1	185703968	HMCN1	0.0266968	0.79447	0.306353	0.0198616	0.0353955
1	207495871	CD55	0.0267241	NA	NA	0.0267241	NA
13	76335140	LMO7	0.0267918	0.895483	0.372721	0.0440313	0.0117023
10	54074240	DKK1	0.0268671	0.0354876	0.223288	0.233486	0.09333
6	56328406	DST	0.0269037	0.0145566	0.0367848	0.544274	0.593644
1	109517374	WDR47	0.0270334	0.1164	0.1385	0.0682633	0.1583
16	88643653	ZC3H18	0.027042	0.583966	0.959491	0.0835298	0.00372391
11	5461861	OR51I1	0.0270698	0.183204	0.00201283	0.580759	0.815029
11	6644308	DCHS1	0.0270718	0.0547058	0.348735	0.388274	0.0235661
5	123982685	ZNF608	0.0271028	0.1009	0.46111	0.0064429	0.583303
1	19652766	PQLC2	0.0271237	NA	0.08231	0.05089	NA
5	52978982	NDUFS4	0.02713	0.02713	NA	NA	NA
2	189599373	DIRC1	0.0271629	0.0890223	0.019449	0.196415	0.5158
12	7043191	ATN1	0.0271707	0.339726	0.00289186	0.203336	0.878439
15	86687049	AGBL1	0.0271759	0.611447	0.270742	0.00118839	0.892234
2	239013429	ESPNL	0.0271793	0.0192974	0.541196	0.369755	0.0454634
14	60976501	SIX6	0.0271926	0.0154192	0.423528	0.0454354	0.5921
11	9163580	DENND5A	0.0272319	0.214642	0.291721	0.0613481	0.04583
15	39909953	FSIP1	0.0274029	0.00814814	0.961522	0.104925	NA
21	46875817	COL18A1	0.0275364	0.00519018	0.64189	0.0851855	0.630328
19	51379798	KLK2	0.0275764	0.2043	0.803755	0.3817	0.00286
1	248525348	OR2T4	0.02758	0.02758	NA	NA	NA
17	48625669	SPATA20	0.0276365	0.888751	NA	0.00481867	NA
2	206588569	NRP2	0.0277325	0.626905	0.189184	0.0451718	0.0337328
2	26203407	KIF3C	0.02777	0.02777	NA	NA	NA
9	130868670	SLC25A25	0.0277774	0.2203	0.1069	0.126172	0.0609624
7	146778337	LOC101928700	0.02782	0.02782	NA	NA	NA
5	153709145	GALNT10	0.0278848	0.34078	NA	0.0127008	NA
1	117249108	C1orf137	0.02792	0.02792	NA	NA	NA
16	2079665	SLC9A3R2	0.027956	0.00438648	NA	0.989695	NA
3	42727434	KLHL40	0.0279665	0.00084753	0.567654	0.493528	0.770382
12	133428319	CHFR	0.0280032	0.346312	0.204699	0.0119331	NA
14	89307227	TTC8	0.0280155	0.92017	0.212948	0.000961781	0.973045
19	19291568	BORCS8	0.02803	NA	NA	0.02803	NA
13	43148653	TNFSF11	0.0280852	0.0783	0.04184	0.0905187	0.6206
15	45410260	DUOXA1	0.0281159	0.0193	0.0613643	0.718074	NA
1	23417894	LUZP1	0.0281293	0.4182	0.189631	0.157558	0.0147621
9	139697124	CCDC183	0.0281522	0.752447	0.958847	0.000403191	0.634828
2	198436771	RFTN2	0.0281998	0.0196744	0.661788	0.0191436	0.742688
6	40998140	UNC5CL	0.0283635	0.50021	0.56418	0.00108085	0.611979
11	117042408	PAFAH1B2	0.0283666	NA	NA	0.0716096	0.06168
17	3627347	HASPIN	0.0284198	0.469105	0.00958154	0.043318	0.96147
11	47611672	C1QTNF4	0.02855	NA	NA	0.02855	NA
12	15102799	ARHGDIB	0.0285755	0.02331	0.8666	0.02543	0.3673
5	38352421	EGFLAM	0.0286197	0.752752	0.218076	0.0323825	0.0355733
12	71519116	TSPAN8	0.0286284	0.8142	0.4993	0.420763	0.001106
1	2106723	PRKCZ	0.0286514	0.9172	0.59	0.00161128	NA
17	18647663	FBXW10	0.0286634	0.0280885	NA	0.1592	NA
1	24383873	MYOM3	0.0287027	0.0108481	0.0448102	0.896006	0.43598
2	220075521	ABCB6	0.0287195	0.808864	0.905222	0.00203503	0.127548
12	6061578	VWF	0.0288278	0.00319009	0.351221	0.17352	0.982874
9	139089436	LHX3	0.0288596	0.747866	0.2171	0.00542212	NA
2	37353472	EIF2AK2	0.0289335	NA	NA	0.0289335	NA
1	114340502	RSBN1	0.0289785	0.3046	0.4377	0.002718	0.5313
3	178525219	KCNMB2	0.0291	NA	NA	0.0291	NA
6	152443756	SYNE1	0.029216	0.0748248	0.794252	0.00510616	0.641964
2	219854997	CRYBA2	0.0292406	0.5277	NA	0.00867651	NA
5	130517930	LYRM7	0.02928	NA	NA	0.02928	NA
14	100803422	WARS	0.0292869	0.136145	0.3465	0.00537209	0.7714
9	125315478	OR1N2	0.0293315	0.3418	0.573484	0.00458874	NA
4	155156412	DCHS2	0.0293755	0.952448	0.451298	0.805131	0.000567349
9	95874559	CARD19	0.0293887	0.09641	0.141659	0.06603	NA
15	73409045	NEO1	0.0295959	0.35967	0.994058	0.0674697	0.00822784
14	20837565	TEP1	0.0296	0.629176	0.120102	0.00345638	0.760068
4	44712970	GNPDA2	0.02964	NA	NA	0.02964	NA
1	117113552	CD58	0.0297	NA	NA	0.0297	NA
11	102819870	MMP13	0.0297117	0.4593	0.49499	0.00130396	0.673289
2	191064591	C2orf88	0.0297711	NA	0.5278	0.00886185	NA
16	61687583	CDH8	0.0298196	0.338514	0.584844	0.00114886	0.882164
19	3179427	S1PR4	0.0298561	0.243437	0.00675446	0.247205	0.4945
5	79854826	ANKRD34B	0.0298571	0.0709451	0.653811	0.0393993	0.109991
10	23633660	C10orf67	0.0299444	0.07319	0.0749	0.05238	0.703
13	114535710	GAS6	0.0300724	0.156407	0.0334486	0.784318	0.0494999
17	7758522	TMEM88	0.0300825	0.0188887	NA	0.2507	NA
2	201434409	SGO2	0.0302809	0.638437	0.901892	0.0281126	0.0126735
22	40417943	FAM83F	0.0302897	0.8578	0.149948	0.00340724	0.4683
7	6175526	USP42	0.0303727	0.0223822	0.143883	0.100633	0.6358
10	127477552	UROS	0.0304922	0.8396	0.4893	0.42	0.001201
2	242756294	NEU4	0.0304979	0.9158	0.2812	0.489003	0.001646
14	24035016	LOC102724814	0.0305	0.0305	NA	NA	NA
11	10874853	ZBED5	0.030549	0.332711	0.164304	0.696268	0.00545907
22	19467510	CDC45	0.0305562	0.605058	0.0681443	0.00647714	0.7783
12	7882269	CLEC4C	0.0305628	0.296576	NA	0.01627	NA
5	137451371	NME5	0.0306581	NA	NA	0.008103	0.5977
14	78146252	ALKBH1	0.0308005	0.00849173	NA	0.573486	NA
12	54394337	HOXC9	0.030823	0.1399	NA	0.03484	NA
12	51072605	DIP2B	0.0308726	0.858571	0.747547	0.567325	0.000579411
10	101379915	SLC25A28	0.03091	NA	NA	0.03091	NA
2	3598061	RNASEH1	0.0309199	0.7296	0.06598	0.02004	NA
19	17972120	RPL18A	0.0309897	NA	0.1223	0.04011	NA
19	51329146	KLK15	0.0310312	0.0178236	0.0388196	0.485519	0.632708
6	116381177	FRK	0.0310617	0.1401	0.01198	0.248565	0.5102
11	32413538	WT1	0.0311745	0.5702	NA	0.008664	NA
17	27896342	TP53I13	0.0311748	0.437401	0.995721	0.1823	0.00269499
19	46177412	GIPR	0.0312034	0.767611	0.00140949	0.451612	0.4385
3	38022254	CTDSPL	0.031359	0.01661	0.3275	0.180701	NA
5	150056307	MYOZ3	0.03138	0.03138	NA	NA	NA
15	75763044	PTPN9	0.0313868	0.222261	0.0456265	0.0970445	NA
1	16451722	EPHA2	0.031389	0.639899	0.472762	0.00376112	0.189934
5	66479875	CD180	0.0314029	0.04994	NA	0.090958	0.2168
17	47299919	ABI3	0.0314873	0.3626	0.0896372	0.241477	0.0276598
6	28358379	ZSCAN12	0.0315466	0.47084	0.004136	0.2578	0.4336
3	42734587	HHATL	0.0315621	0.140312	0.00313664	0.510032	0.97046
8	82606296	SLC10A5	0.0315755	0.270292	0.0188226	0.0773634	0.5538
19	18876306	CRTC1	0.03163	0.03163	NA	NA	NA
18	24497039	CHST9	0.0316506	0.054255	0.04825	0.488613	0.171
22	44280225	PNPLA5	0.031652	0.637097	0.1151	0.055829	0.05343
1	204923418	NFASC	0.0317321	0.642184	0.307678	0.567448	0.00195811
9	4826961	RCL1	0.0317878	0.143939	0.588372	0.0110243	0.235744
12	302492	SLC6A12	0.0318183	0.0166583	0.25288	0.0913917	0.5725
6	43305008	ZNF318	0.031831	0.867038	0.0781928	0.259638	0.0125287
13	26043196	ATP8A2	0.0318753	0.154299	0.553641	0.00322065	0.803191
20	3870023	PANK2	0.0319292	0.784693	0.206397	0.0112858	0.121195
12	110841379	ANAPC7	0.0319612	0.0601572	NA	0.546074	0.0306901
11	836407	CD151	0.03198	0.03198	NA	NA	NA
10	123842325	TACC2	0.0319988	0.210129	0.871279	0.00146431	0.828928
7	29234574	CHN2	0.0320181	0.626597	NA	0.0081385	NA
11	35454333	PAMR1	0.0322152	0.126261	0.88266	0.00205774	0.978571
3	50385209	NPRL2	0.03229	0.03229	NA	NA	NA
6	73951407	KHDC1	0.0323388	0.158012	0.632932	0.328342	0.006872
5	98128948	RGMB	0.0323401	0.1726	NA	0.0298994	NA
22	37966649	LGALS2	0.0323478	0.01855	NA	0.783476	0.0704895
9	125152621	PTGS1	0.0323918	0.4949	0.2717	0.00213996	0.7861
15	31235179	MTMR10	0.0324023	0.334779	0.417808	0.902392	0.00179294
17	38031648	ZPBP2	0.0324428	0.3549	0.106911	0.027106	NA
1	48231630	TRABD2B	0.0325199	0.54613	NA	0.009512	NA
3	121388060	GOLGB1	0.0325269	0.575789	0.947855	0.000529943	0.786835
1	46511746	LOC110117498-PIK3R3;PIK3R3	0.0327032	0.04072	0.23923	0.106708	NA
17	41053086	G6PC	0.0327371	0.253822	NA	0.0206291	NA
19	53668522	ZNF665	0.0327795	0.6387	0.9137	0.00178678	NA
14	65479035	CHURC1-FNTB;FNTB	0.032963	0.8816	0.0597392	0.022595	0.194976
1	118516082	SPAG17	0.0330585	0.62806	0.030076	0.0200604	0.614885
20	17930836	SNX5	0.033247	0.176115	NA	0.0302834	NA
1	41976351	HIVEP3	0.0333148	0.0446843	0.139362	0.0444359	0.851533
2	234749673	HJURP	0.0333747	0.165175	0.449958	0.203997	0.0155822
9	114304105	ZNF483	0.0334194	NA	NA	0.0390847	0.1373
11	63672479	MARK2	0.0334294	0.385053	0.5635	0.144393	0.00755866
14	24658776	TM9SF1	0.0334684	0.00210892	0.833103	0.949312	0.142225
20	19937376	RIN2	0.0334709	0.717171	0.674577	0.000503918	0.97314
3	170136972	CLDN11	0.0336634	0.07114	NA	0.07609	NA
4	85414579	NKX6-1	0.0337	NA	NA	0.0337	NA
11	18637009	SPTY2D1	0.0337604	0.0560788	0.0122567	0.575533	0.607285
1	171605387	MYOC	0.0337739	0.181457	NA	0.0299478	NA
2	241631588	AQP12A	0.0337767	0.5009	NA	0.01085	NA
12	10977956	TAS2R10	0.033836	0.862944	0.00171066	0.50843	0.321125
8	99961655	OSR2	0.03394	0.03394	NA	NA	NA
4	56422799	PDCL2	0.03401	NA	NA	0.03401	NA
1	18149613	ACTL8	0.0341096	0.876103	0.454291	0.00118295	0.517955
12	123042001	KNTC1	0.0341387	0.0271972	0.341051	0.0732401	0.359415
7	94928346	PON1	0.0341511	0.224482	0.353964	0.272928	0.0112649
7	6049010	AIMP2;AIMP2	0.03416	NA	NA	0.03416	NA
11	45931647	PEX16	0.0342368	0.09838	NA	0.0561407	NA
16	3708130	TRAP1	0.0342375	0.156137	0.460776	0.247547	0.0137678
10	76854612	DUSP13	0.0343227	0.5078	0.306	0.747743	0.002118
19	11658639	CNN1	0.0343439	NA	NA	0.0343439	NA
8	623647	ERICH1	0.0343917	0.8891	NA	0.0767149	0.0163
11	66188725	NPAS4	0.0344379	0.877598	0.0546501	0.0114838	0.448997
14	74951189	NPC2	0.0345991	0.523903	NA	0.0106755	NA
17	39723648	KRT9	0.0346713	0.6919	0.00440014	0.157694	0.520198
17	56770008	RAD51C	0.0347388	0.0871166	0.163402	0.0903	0.194841
2	50724817	NRXN1	0.0347835	0.823488	0.262018	0.00244242	0.476138
11	117969787	TMPRSS4	0.034804	0.0711837	0.504766	0.31083	0.0224866
4	55968597	KDR	0.0348136	0.303062	0.175454	0.27531	0.0171623
7	150499402	TMEM176A	0.0348503	0.523287	0.01272	0.320547	0.117934
17	48650063	CACNA1G	0.034919	0.107866	0.0896186	0.0388477	0.671984
22	44489850	PARVB	0.0350835	NA	0.342149	0.0173088	0.1928
19	12637322	ZNF564	0.0351012	NA	NA	0.0351012	NA
16	75512751	CHST6	0.0351342	0.156595	0.00970407	0.399049	0.4199
5	168093556	SLIT3	0.0351477	0.00152308	0.660256	0.322303	0.786045
22	36886060	FOXRED2	0.0351545	0.636128	0.924144	0.000553099	0.78376
18	23612484	SS18	0.0352235	NA	NA	0.0352235	NA
22	30038249	NF2	0.0352371	0.007265	NA	0.786809	NA
1	95699811	RWDD3	0.0352853	NA	0.006102	0.9383	NA
11	5221008	OR51V1	0.0352862	0.815654	0.0603765	0.203162	0.0256111
3	183818264	HTR3E	0.0353462	0.143539	NA	0.0399704	NA
11	111590605	SIK2	0.0353675	0.3517	0.431987	0.00398454	0.4247
3	14861289	FGD5	0.0354334	0.129143	0.608835	0.230064	0.0142518
16	77759403	NUDT7	0.0354476	0.0296738	0.9247	0.031112	0.302161
17	3832733	ATP2A3	0.0354638	0.317532	0.685135	0.00123778	0.958569
9	100364783	TSTD2	0.0354824	0.183527	0.0388369	0.0475905	0.761549
7	65547874	ASL	0.0355298	0.9317	0.6222	0.000824834	0.5413
3	123419117	MYLK	0.0355347	0.127598	0.47763	0.84852	0.00500609
9	139748023	MAMDC4	0.0355599	0.600361	0.0857393	0.0186555	0.269866
14	24877699	NYNRIN	0.0355822	0.98346	0.323236	0.0724296	0.0112656
12	25671809	LMNTD1	0.0355882	0.2631	0.368767	0.00353074	0.757382
11	124179902	OR8D1	0.0356073	0.286822	0.862788	0.0221223	0.0474294
6	74078580	OOEP	0.0356583	0.462749	0.2693	0.009364	NA
7	143632983	OR2F2	0.0357217	NA	0.3041	0.0191061	NA
22	35658407	HMGXB4	0.035761	NA	NA	0.035761	NA
12	95478283	FGD6	0.0357754	0.325057	0.71254	0.00245909	0.459031
6	32407773	HLA-DRA	0.0358093	0.359259	NA	0.01622	NA
14	42355844	LRFN5	0.0358176	0.5787	0.00128172	0.969497	0.3642
8	91094898	CALB1	0.0359036	NA	0.02432	0.3937	0.123
17	77755635	CBX2	0.0359447	0.0632337	0.0301125	0.156719	0.8822
2	26818069	CIB4	0.035946	0.08757	0.3578	0.0659023	0.1275
12	48105483	ENDOU	0.0359583	0.431973	0.991063	0.0012228	0.503164
9	21206532	IFNA10	0.03596	0.03596	NA	NA	NA
15	78873272	CHRNA5	0.0360336	NA	NA	0.875978	0.006702
17	8285501	RPL26	0.0360609	0.2693	NA	NA	0.02182
14	24909630	SDR39U1	0.0360717	0.244516	0.02723	0.287999	0.138
20	858841	ANGPT4	0.0361364	0.0336104	0.294274	0.164115	0.163452
2	233321394	ALPI	0.0361475	NA	NA	0.0361475	NA
1	15956880	DDI2	0.03615	NA	NA	0.03615	NA
4	165891141	TRIM61	0.03624	0.03624	NA	NA	NA
5	43487210	C5orf34	0.0363028	NA	0.00864356	0.376011	0.367772
6	160543080	SLC22A1	0.0364764	0.067162	0.16936	0.0487337	0.485237
4	86950379	MAPK10	0.0366	NA	NA	0.0366	NA
6	144081643	PHACTR2	0.0366278	NA	NA	0.0366278	NA
17	706933	NXN	0.0367445	0.0113045	NA	0.5316	NA
6	26384060	BTN2A2	0.0367869	0.730981	0.941884	0.00160163	0.246971
10	70730020	DDX21	0.0368419	0.4116	0.03553	0.0833668	NA
17	10397687	MYH1	0.0368543	0.853826	0.816361	0.00351909	0.111325
10	120801896	EIF3A	0.0368674	0.252537	0.483672	0.138085	0.0161988
21	45786650	TRPM2	0.0369144	0.196616	0.656066	0.00483003	0.439335
17	40010572	KLHL11	0.0369545	0.00122451	0.6623	0.9731	0.3474
6	27420698	ZNF184	0.0369822	0.6297	0.778584	0.000819277	0.6833
19	16859994	NWD1	0.0370176	0.805524	0.229907	0.00166734	0.890091
13	114107571	ADPRHL1	0.0370683	0.6729	0.0974724	0.0273719	0.1534
14	79181481	NRXN3	0.037116	0.144487	0.911	0.875507	0.00239427
6	121767998	GJA1	0.037161	0.1531	NA	0.0397846	NA
17	80789037	ZNF750	0.0372844	0.238004	0.912467	0.049899	0.0256313
6	31503219	DDX39B	0.03732	0.03732	NA	NA	NA
8	101153272	FBXO43	0.0374684	0.0492395	0.0266915	0.30694	0.693522
5	150838496	SLC36A1	0.0375186	0.224896	0.6295	0.0088248	NA
16	74657852	RFWD3	0.0375268	0.8634	0.009897	0.0740752	0.443
17	8157556	PFAS	0.0375822	0.181639	0.195514	0.816965	0.00968592
17	28505192	NSRP1	0.0375879	NA	0.477701	0.0129261	NA
21	36259336	RUNX1	0.03789	NA	NA	0.03789	NA
3	37292887	GOLGA4	0.0379821	0.269241	0.758468	0.954948	0.0014636
10	99190891	PGAM1	0.03804	NA	NA	0.03804	NA
12	58004404	ARHGEF25	0.03807	0.0582785	0.03724	0.58706	NA
10	53458049	CSTF2T	0.0380995	NA	0.02359	0.266026	NA
5	150175109	SMIM3	0.0381326	0.3276	0.5265	0.003451	0.4823
9	101052937	GABBR2	0.03817	NA	NA	0.03817	NA
7	143079970	ZYX	0.0381816	NA	NA	0.0381816	NA
9	131689395	PHYHD1	0.0382467	0.295171	0.314579	0.00361425	0.859192
21	43892951	RSPH1	0.0383465	0.196482	0.252722	0.145484	0.0400676
18	28574450	DSC3	0.0383525	0.636947	0.265389	0.421898	0.00405957
5	146658886	STK32A	0.0383817	NA	NA	0.464509	0.01363
22	26886094	SRRD	0.0384775	0.01966	NA	0.323	NA
16	27078437	C16orf82	0.0385709	0.625348	0.08458	0.721025	0.00765524
20	62373796	SLC2A4RG	0.0386252	0.02384	0.4702	0.0746491	0.34961
3	45869987	LZTFL1	0.0386878	NA	NA	0.0108741	0.5878
3	142188337	ATR	0.0386959	0.502297	0.940959	0.368621	0.00168366
8	22019383	SFTPC	0.0387403	0.1595	NA	0.0401391	NA
15	65345387	SLC51B	0.03875	NA	NA	0.03875	NA
1	183079729	LAMC1	0.0388024	0.055742	0.20118	0.0330646	0.794311
12	10165456	CLEC12B	0.038941	0.3162	0.005362	0.727005	0.2402
15	22845832	TUBGCP5	0.0389848	0.173155	0.869513	0.00653415	0.301452
3	46399158	CCR2	0.0390566	NA	NA	0.00814535	0.793687
2	190656564	PMS1	0.0390729	0.131159	0.0373562	0.204191	0.297415
6	41773728	USP49	0.0390862	0.2922	0.572347	0.00789333	NA
19	15563529	RASAL3	0.0391575	0.862586	0.6398	0.000659521	0.8201
1	89652204	GBP4	0.0391838	0.620889	0.6487	0.0129739	0.05718
1	150248200	C1orf54	0.03921	NA	NA	0.03921	NA
1	39325136	RRAGC	0.03921	0.03921	NA	NA	NA
17	17250197	NT5M	0.039236	0.8428	0.002831	0.381964	0.3285
3	10146036	FANCD2OS	0.0393708	0.9971	NA	0.00654622	NA
1	159923234	SLAMF9;SLAMF9	0.0394	NA	NA	0.0394	NA
4	57829669	NOA1	0.0394146	0.00862033	0.0824036	0.464508	0.913404
5	37815756	GDNF	0.03952	0.413006	0.0375294	0.148788	0.131201
7	102669175	FBXL13	0.0396141	0.03252	0.271943	0.0791533	0.43377
18	13008497	CEP192	0.0396222	0.0372858	0.0385591	0.310863	0.679589
4	843498	GAK	0.0396993	0.603328	0.0544982	0.01268	0.730596
17	73723281	ITGB4	0.0397454	0.48604	0.470795	0.00642137	0.207655
17	42018835	PPY	0.0398266	NA	0.2658	0.02091	0.2436
19	55602910	PPP1R12C	0.0399604	NA	0.6309	0.010532	NA
11	972124	AP2A2	0.0399884	0.341187	0.491187	0.00225611	0.814281
19	5208046	PTPRS	0.0400006	0.161561	0.458287	0.0142828	0.291261
1	78267163	MIGA1	0.0400141	0.2148	0.119551	0.194516	0.0616937
1	205628442	SLC45A3	0.0400144	0.0847705	0.503369	0.010819	0.66753
12	56663345	COQ10A	0.0400237	NA	NA	0.0400237	NA
10	32320002	KIF5B	0.0400417	0.2316	0.4412	0.00592761	0.5093
21	37443349	CBR1	0.0400476	0.124078	0.04824	0.110873	0.464939
1	183616866	APOBEC4	0.0400572	0.150038	0.747806	0.571945	0.00480984
5	158702232	UBLCP1	0.04015	NA	NA	0.04015	NA
8	29923653	SARAF	0.04018	NA	NA	0.04018	NA
14	55903280	TBPL2	0.040247	0.01177	NA	0.5694	NA
16	88930739	PABPN1L	0.0402965	0.34597	0.112937	0.0121262	0.657188
5	881238	BRD9	0.0405123	0.00925285	NA	0.5033	0.2975
10	14816378	FAM107B	0.0405717	0.0405717	NA	NA	NA
11	113078660	NCAM1	0.0406306	0.313219	0.455313	0.113403	0.0194893
22	25331451	TMEM211	0.04064	NA	NA	0.04064	NA
10	103369228	DPCD	0.04065	0.04065	NA	NA	NA
1	226037778	TMEM63A	0.0407107	0.774574	0.0581034	0.00811742	0.865289
20	31368202	DNMT3B	0.0408964	0.0169849	0.9308	0.152553	0.131954
1	215781472	KCTD3	0.04099	0.3503	0.12026	0.0168651	0.449445
1	17249278	CROCC	0.0410381	0.196742	0.907844	0.00311191	0.5755
1	44137320	KDM4A	0.0411496	0.104389	0.8156	0.0119523	0.3156
1	152323427	FLG2	0.0412378	0.0798033	0.352489	0.0200184	0.572135
1	193181196	CDC73	0.04124	NA	NA	0.04124	NA
18	76856627	ATP9B	0.0412659	0.736226	0.455059	0.169093	0.0056928
19	12995797	KLF1	0.0413149	0.0413149	NA	NA	NA
1	158687477	OR6K3	0.0413339	0.200146	NA	0.644832	0.01103
1	21071406	HP1BP3	0.0413606	NA	0.04342	0.0930364	0.3527
5	177673296	COL23A1	0.0413876	0.281946	0.188466	0.0233282	0.2613
16	48395527	SIAH1	0.04149	0.04149	NA	NA	NA
14	104029346	APOPT1	0.04153	NA	NA	0.04153	NA
1	26872452	RPS6KA1	0.041596	NA	NA	0.041596	NA
5	132219077	AFF4	0.0416031	0.00762397	0.168449	0.842981	0.3015
9	140063557	LRRC26	0.0416075	0.9629	0.006242	0.350417	0.155
10	119001253	SLC18A2	0.0416135	NA	NA	0.330144	0.02113
1	150129585	PLEKHO1	0.0416858	0.185902	0.970015	0.00192077	0.945132
20	29960720	DEFB118	0.0418008	0.683509	0.321634	0.0778486	0.0192062
3	155546124	SLC33A1	0.0418157	0.394566	0.540386	0.00238507	0.6467
9	74561924	C9orf85	0.0419038	0.0226716	0.141	0.1342	0.769
21	31914013	KRTAP19-6	0.04196	NA	NA	0.04196	NA
19	3531959	FZR1	0.0419608	NA	0.206	0.809606	0.008711
6	28227217	NKAPL	0.0419673	0.163382	0.043425	0.0495951	0.939656
8	103564006	ODF1	0.0420948	0.336486	0.0145685	0.944388	0.0717413
15	31294404	TRPM1	0.0421096	0.793951	0.0736972	0.271321	0.0209315
11	56114281	OR8K1	0.042256	0.9977	0.1261	0.00785	0.3382
13	20409784	ZMYM5	0.042267	0.472629	0.992249	0.000984344	0.723834
19	18391285	JUND	0.04228	NA	NA	0.04228	NA
4	88085192	KLHL8	0.0423118	0.7015	0.0471485	0.0444232	NA
7	53103945	POM121L12	0.0423381	0.9111	0.1601	0.579608	0.003962
14	24806303	RIPK3	0.0424063	0.386657	0.1371	0.348022	0.0182
1	67474795	SLC35D1	0.0424194	0.00117	0.350906	0.976965	0.8375
1	6293647	ICMT	0.0424246	0.003934	0.685488	0.558953	0.2229
22	35802592	MCM5	0.0425508	0.196215	0.74198	0.97609	0.00237473
8	25317966	CDCA2	0.0425962	0.576539	0.0731037	0.115807	0.0692489
19	45448084	APOC4	0.0426945	0.1503	0.09228	0.107234	NA
12	3392277	TSPAN9	0.042699	0.2191	NA	0.03284	NA
1	162343861	SPATA46	0.0428966	0.352994	0.130097	0.02221	0.334853
1	209768356	CAMK1G	0.0429341	0.00225203	0.561822	0.334706	0.807537
16	10837728	NUBP1	0.0429371	NA	NA	0.0429371	NA
10	30749700	MAP3K8	0.0429698	0.0914826	NA	0.0792519	NA
5	133901944	JADE2	0.0429847	NA	0.719049	0.182474	0.01144
10	15145453	RPP38	0.0429858	0.00405973	NA	0.998006	0.370483
5	166711862	TENM2	0.0430139	0.0567942	0.0111052	0.83265	0.652984
2	112990912	ZC3H8	0.0430244	NA	0.9525	0.00762337	NA
16	89735891	SPATA33	0.0430507	0.02853	NA	0.2547	NA
17	39550308	KRT31	0.0430565	0.005093	0.3128	0.944335	NA
2	149528838	EPC2	0.043081	0.48338	NA	0.0150456	NA
7	50671714	GRB10	0.0430913	NA	0.8516	0.00854254	NA
20	2968736	PTPRA	0.0430931	NA	NA	0.0430931	NA
4	126238090	FAT4	0.0431318	0.0310322	0.439107	0.0518802	0.487048
11	74717217	NEU3	0.0431622	0.00959	0.1328	0.380882	0.710564
5	154394577	KIF4B	0.0432428	0.123616	0.771951	0.00560953	0.645683
12	120568464	GCN1	0.043314	0.775361	0.433138	0.00589657	0.174961
11	116706664	APOA1	0.0434193	0.3398	0.00645697	0.363778	0.435658
19	51563876	KLK13	0.04342	0.04342	NA	NA	NA
15	91475018	HDDC3	0.043464	0.08107	NA	0.09067	NA
9	71152359	TMEM252	0.0436251	0.006383	0.06714	0.909478	0.898426
1	34330096	HMGB4	0.0438154	0.01773	0.2201	0.394753	NA
17	39156085	KRTAP3-2	0.04385	0.04385	NA	NA	NA
1	54254812	NDC1	0.0438879	0.952217	0.457646	0.0123046	0.06589
17	17766114	TOM1L2	0.0440039	0.0277856	0.679121	0.0821143	NA
20	35526858	SAMHD1	0.0440693	NA	0.6489	0.011518	NA
17	79478236	ACTG1	0.044083	NA	0.189	0.03956	NA
9	134308126	PRRC2B	0.044144	0.148521	0.93873	0.0311935	0.0819425
3	43344716	SNRK	0.0441821	0.402648	0.0752556	0.0235095	0.5009
3	119102053	ARHGAP31	0.0442402	0.562985	0.99519	0.0424879	0.0150189
1	162351752	C1orf226	0.0442851	NA	0.06139	0.5135	0.0495793
6	42224569	TRERF1	0.0444062	0.738316	0.789205	0.000747254	0.8257
15	65295441	MTFMT	0.0444511	0.283251	0.381524	0.712581	0.0046757
19	35800889	MAG	0.0444794	0.7282	0.348336	0.00556123	0.255485
18	47310224	ACAA2	0.0445717	0.0209655	0.4416	0.724793	0.0538735
1	27056179	ARID1A	0.0446728	0.863529	0.90955	0.000772656	0.597719
7	107399213	CBLL1	0.0446941	NA	0.6028	0.2032	0.01292
11	99690428	CNTN5	0.0448988	0.147205	0.248691	0.0118469	0.842667
22	29838068	RFPL1	0.0449806	0.0318	NA	0.2409	NA
2	3691324	COLEC11	0.04508	0.3524	0.87555	0.481332	0.00247562
7	25175698	C7orf31	0.0451087	0.00259836	0.242901	0.800301	0.728577
1	18661482	IGSF21	0.0451159	0.641678	0.643206	0.00130733	0.682194
17	27185660	ERAL1	0.045171	0.703	0.8974	0.000656629	0.8902
14	31771560	HEATR5A	0.0452315	0.100293	0.339783	0.509074	0.0212992
1	109878893	SORT1	0.0452632	0.0979983	0.668152	0.783848	0.00720676
17	73554701	LLGL2	0.0453553	0.809071	0.801413	0.377175	0.00151703
10	116207642	ABLIM1	0.0453717	0.0545376	0.390995	0.0191907	0.9071
3	50655190	MAPKAPK3	0.0454208	0.3012	0.1795	0.1606	0.04282
1	145592762	POLR3C	0.0454474	0.83742	0.882199	0.00163702	0.307699
2	231937054	PSMD1	0.0454855	0.2502	0.4422	0.00782446	0.4304
1	38453330	SF3A3	0.04555	NA	NA	0.04555	NA
5	148388512	SH3TC2	0.0456622	0.19706	0.994626	0.00910133	0.210076
1	155160270	MUC1	0.0456744	0.785115	0.00528439	0.707055	0.1278
1	237540665	RYR2	0.0458363	0.553178	0.12238	0.291409	0.0191039
11	71715129	NUMA1	0.0458518	0.70669	0.037158	0.0154466	0.929617
7	156976655	UBE3C	0.0458558	0.0978955	0.102952	0.0937291	0.399213
19	12848342	ASNA1	0.04589	NA	NA	0.04589	NA
9	8404560	PTPRD	0.045893	0.496892	0.095025	0.0311026	0.2571
9	6250546	IL33	0.0458946	0.0396	NA	0.1982	NA
18	2573067	NDC80	0.0459229	0.234963	0.0668	0.0247323	0.9736
11	126162383	TIRAP	0.045999	0.1616	0.536966	0.0243378	0.1794
8	23058081	TNFRSF10A	0.0460127	0.01546	0.8641	0.12324	NA
20	43836237	SEMG1	0.0460326	0.861915	0.970922	0.00186789	0.242641
18	74082537	ZNF516	0.0460547	0.711022	0.0363074	0.0200091	0.7348
2	138727746	HNMT	0.04608	NA	NA	0.04608	NA
11	102643604	MMP10	0.046099	0.954887	0.2489	0.0368959	0.0433453
16	1827133	SPSB3	0.0461156	0.256889	0.675849	0.619781	0.00353424
12	110207078	FAM222A	0.0461264	0.7011	0.904	0.0201562	0.02978
3	11600807	VGLL4	0.0461327	0.1731	0.0268264	0.3558	NA
11	19167744	ZDHHC13	0.0461923	0.844035	0.980172	0.000902353	0.5107
12	57859426	GLI1	0.0463114	0.480208	0.61914	0.0013371	0.9627
3	193332522	OPA1	0.046415	0.559381	0.0323686	0.720769	0.0294233
10	69565364	DNAJC12	0.04654	NA	NA	0.04654	NA
11	66617502	PC	0.0465414	0.00671544	0.286382	0.869481	NA
6	43485090	POLR1C	0.0466862	0.930669	0.364522	0.00143322	0.796636
1	26365751	SLC30A2	0.0467425	0.01138	NA	0.7051	NA
4	102117083	PPP3CA	0.0467706	0.07834	NA	0.1025	NA
2	106729219	UXS1	0.0468721	0.1463	NA	0.05503	NA
1	159504971	OR10J5	0.046958	0.784267	0.785	0.0217031	0.0292413
19	51480829	KLK7	0.0472604	NA	0.01175	0.692044	NA
1	24140734	HMGCL	0.0472919	NA	0.7926	0.4933	0.004371
22	38259334	EIF3L	0.04731	NA	NA	0.04731	NA
6	149721529	SUMO4	0.0473351	0.7528	NA	0.0108223	NA
6	154360569	OPRM1	0.0474133	0.246284	0.952771	0.905565	0.00186536
1	15495100	C1orf195	0.04744	0.04744	NA	NA	NA
1	120341126	REG4	0.0474942	NA	NA	0.010569	0.773973
1	93426938	FAM69A	0.04753	0.04753	NA	NA	NA
5	68487643	CENPH	0.0476113	0.07258	0.03382	0.879262	0.1848
1	27190149	SFN	0.0476852	0.07314	NA	0.112386	NA
10	50530724	C10orf71	0.0477562	0.471049	0.748766	0.00191354	0.593654
22	39996558	CACNA1I	0.0477733	0.354442	0.134562	0.0957886	0.0877475
19	57905559	ZNF548	0.0477846	0.714436	0.0905324	0.366222	0.01693
19	7794772	CLEC4G	0.0478	0.215894	0.1559	0.321478	0.03708
2	131103254	IMP4	0.0478604	0.133254	0.7437	0.00602972	0.6727
16	3117564	IL32	0.047889	0.0360942	0.113031	0.232972	0.423299
2	48036361	FBXO11	0.0479224	NA	NA	0.00904048	0.9147
9	34179037	UBAP1	0.0479667	NA	0.123521	0.0670215	NA
1	209788656	LAMB3	0.0481213	0.0103373	0.11759	0.406323	0.8205
6	130466547	SAMD3	0.0483501	0.7318	0.693741	0.0698887	0.011503
11	8060469	TUB	0.0484263	0.202636	0.298181	0.0597553	0.113307
7	30702334	CRHR2	0.04849	0.355128	0.0702352	0.0482854	0.340352
17	18219591	SMCR8	0.0486275	0.504738	0.1193	0.765885	0.00892591
5	10227711	FAM173B	0.0488422	0.04154	0.17978	0.148716	0.373096
21	45666335	DNMT3L	0.0488624	0.101312	0.974313	0.0168965	0.2486
2	159481865	PKP4	0.0490216	0.578839	0.00782359	0.115337	0.797699
2	179392277	TTN	0.0490386	0.787367	0.51407	0.0535543	0.019231
2	209179036	PIKFYVE	0.0490682	0.0506354	0.194569	0.0818359	0.517508
12	57317649	SDR9C7	0.0490798	NA	0.02453	0.34698	NA
3	10302329	TATDN2	0.0491134	0.126498	0.524169	0.133544	0.0471852
13	48619855	NUDT15	0.0491319	NA	0.06169	0.1071	0.2725
3	50334462	NAT6	0.0491417	0.589049	0.3462	0.0107245	0.191208
8	145736215	MFSD3	0.0491544	0.319975	0.9447	0.00595982	NA
6	43483808	YIPF3	0.0491558	0.3465	NA	0.02461	NA
9	90262235	DAPK1	0.0491579	0.776912	0.0253702	0.122936	0.172664
7	102937914	PMPCB	0.0491762	0.250932	0.0282018	0.0884079	0.669102
10	58118390	ZWINT	0.0492074	0.354801	NA	0.0240648	NA
13	25889495	NUP58	0.049212	0.343509	0.3218	0.06218	0.06097
8	143783128	LY6K	0.0492249	0.341905	NA	0.0249831	NA
3	128971732	COPG1	0.0492708	0.50014	0.03407	0.106068	NA
11	2665246	KCNQ1OT1	0.0492781	0.0492781	NA	NA	NA
1	24175151	FUCA1	0.0492932	0.41519	0.180231	0.418134	0.0134267
1	28661074	MED18	0.0493542	NA	NA	0.0493542	NA
20	47558417	ARFGEF2	0.0493902	0.142053	0.372982	0.117774	0.0675235
10	134219379	PWWP2B	0.0494355	0.144111	0.2303	0.054706	NA
5	75427623	SV2C	0.0494695	0.936079	0.0165551	0.45345	0.0601054
2	210642087	UNC80	0.0495336	0.0124935	0.298972	0.179293	0.631903
1	186303520	TPR	0.0495439	0.0445965	0.587969	0.0339301	0.4758
11	65617501	SNX32	0.04961	NA	NA	0.04961	NA
1	169345894	BLZF1	0.0497138	0.00432257	0.538048	0.734031	0.249238
22	31522435	INPP5J	0.0497367	0.849492	0.2152	0.756451	0.003079
10	135438901	FRG2B	0.04977	0.04977	NA	NA	NA
17	79983379	LRRC45	0.0497734	0.0293523	0.962988	0.470964	0.03202
3	47374680	KLHL18	0.04979	NA	NA	0.04979	NA
10	134261243	C10orf91	0.0498445	NA	NA	0.0498445	NA
1	156214641	PAQR6	0.049846	0.01889	0.05386	0.5762	0.7287
22	51178286	ACR	0.04985	0.04985	NA	NA	NA
19	11200231	LDLR	0.0498895	0.66124	0.3856	0.00721043	NA
12	120894973	GATC	0.04989	0.04989	NA	NA	NA
1	45500070	ZSWIM5	0.049915	0.277217	0.00601903	0.759848	0.337636
1	178834155	ANGPTL1	0.0500842	0.272269	NA	0.0320371	NA
1	20021024	TMCO4	0.050137	0.363588	0.211543	0.0109532	0.511518
6	4995505	RPP40	0.0501619	NA	0.1223	0.0714561	NA
1	3412465	MEGF6	0.0502195	0.421253	0.394041	0.00467143	0.55712
12	92537956	BTG1	0.05028	NA	NA	0.05028	NA
22	42910722	RRP7A	0.0503832	0.01977	NA	0.4444	NA
8	19809375	LPL	0.0503941	0.00292786	0.589382	0.401548	0.6267
17	46622228	HOXB2	0.050529	0.3295	NA	0.583255	0.0097345
2	113514125	CKAP2L	0.0505335	0.444339	0.675413	0.928599	0.00156471
20	6064805	FERMT1	0.0505852	0.661497	0.208642	0.0171788	0.1842
7	141137475	TMEM178B	0.05063	NA	NA	0.05063	NA
5	137476416	BRD8	0.0506426	NA	0.8645	0.539334	0.00402475
1	149919225	OTUD7B	0.0506532	0.173438	0.005554	0.47886	0.9487
1	9657037	TMEM201	0.0506928	0.892278	0.439	0.00479718	NA
7	91603056	AKAP9	0.0506935	0.824307	0.0300007	0.285141	0.0621335
17	79898714	MYADML2	0.0507156	NA	0.06193	0.0462977	0.65578
12	6958257	CDCA3	0.0508503	NA	NA	0.0508503	NA
5	140579574	PCDHB11	0.0508829	0.55916	0.00141401	0.885705	0.629159
10	135209255	MTG1	0.0508847	0.133066	0.966477	0.0392552	0.0872782
19	12918142	RNASEH2A	0.05093	NA	NA	0.05093	NA
2	86333401	PTCD3	0.0509822	0.0701757	0.591085	0.36642	0.0290733
17	6547959	MED31	0.05099	0.05099	NA	NA	NA
2	25678275	DTNB	0.0510833	0.0267254	0.0280216	0.771367	0.767227
11	67400566	TBX10	0.0510924	0.0183599	0.6697	0.246277	0.1464
19	49166741	NTN5	0.0511684	0.125223	0.091533	0.856726	0.0452464
20	49127119	PTPN1	0.0511695	0.165283	0.0280633	0.133558	0.717239
9	15578863	CCDC171	0.0513189	0.132944	0.20752	0.648419	0.0249471
12	114837349	TBX5	0.0513439	0.3722	0.060719	0.0317506	0.6224
16	19584459	C16orf62	0.0514248	0.461911	0.00916369	0.238895	0.442704
1	236966848	MTR	0.0514452	0.152288	0.260377	0.0167092	0.676058
17	10599080	SCO1	0.0514937	0.235486	0.8924	0.00292319	0.7302
8	30694326	TEX15	0.051538	0.0216485	0.0290989	0.879264	0.810887
15	64980951	OAZ2	0.0515637	0.01023	0.1276	0.3872	0.8893
11	77930402	GAB2	0.0515894	0.208019	0.0931576	0.0993261	NA
2	108998283	SULT1C4	0.0516558	NA	NA	0.0516558	NA
19	48733756	CARD8	0.0517206	0.9993	0.351768	0.0257588	0.0498676
16	19718267	KNOP1	0.0517237	0.431606	0.0136685	0.220309	0.347451
12	30872061	CAPRIN2	0.0517584	0.0279502	0.217815	0.240462	0.308782
17	1538386	SCARF1	0.0518604	0.332015	0.00703846	0.198292	0.9784
9	130886050	PTGES2	0.051932	0.03541	0.4942	0.03849	0.6745
7	99688952	COPS6	0.0519332	0.8892	0.002303	0.7173	0.3093
2	71738977	DYSF	0.0519585	0.645788	0.128296	0.0140354	0.390989
9	130578230	ENG	0.0519807	0.0314257	0.645001	0.188568	0.119031
7	134216757	AKR1B10	0.0519818	0.215141	NA	0.552085	0.0163745
4	40245208	RHOH	0.05208	NA	NA	0.05208	NA
11	64563757	MAP4K2	0.0520932	0.0778805	0.436457	0.0241573	0.555858
6	29395057	OR11A1	0.0521097	0.0273535	0.184061	0.228938	0.396184
14	64989027	ZBTB1	0.0522392	NA	0.4996	0.018374	NA
8	124238771	C8orf76;ZHX1-C8orf76	0.0523039	NA	0.003207	0.628331	0.9734
19	43979689	PHLDB3	0.0524054	0.449455	0.461013	0.953337	0.00233155
2	216861171	MREG	0.0524564	0.2311	0.01172	0.3719	0.4579
20	44692202	NCOA5	0.0525427	0.0150112	0.2513	0.248374	0.4935
22	32791113	RTCB	0.052545	0.771563	NA	0.011982	NA
17	19459205	SLC47A1	0.0526091	0.08055	0.106416	0.228519	0.2365
19	11096912	SMARCA4	0.0526387	NA	0.323038	0.0286805	NA
10	97816917	CCNJ	0.05273	NA	NA	0.05273	NA
1	38033291	GNL2	0.0527414	0.283177	0.1618	0.0296934	0.3418
11	59856240	MS4A2	0.052829	NA	0.9517	0.699872	0.00298548
7	141705413	MGAM	0.0528606	0.00701718	0.867835	0.0887198	0.863624
19	1555740	MEX3D	0.053	0.053	NA	NA	NA
6	110714008	DDO	0.0530104	0.667667	0.758128	0.150946	0.00613298
12	105519873	WASHC4	0.0531759	0.270525	0.0422263	0.0466013	0.8844
1	115130508	DENND2C	0.0532283	0.279479	0.161268	0.0218468	0.478847
9	35608975	TESK1	0.05331	NA	NA	0.05331	NA
1	94463425	ABCA4	0.0534522	0.0267243	0.91611	0.0408255	0.474727
2	133538651	NCKAP5	0.053514	0.0648731	0.678352	0.0123309	0.875938
8	13424565	C8orf48	0.0535429	0.120943	0.275468	0.742602	0.0192279
2	198570190	MARS2	0.0536881	0.01896	0.1506	0.758849	0.220442
12	129299435	SLC15A4	0.0537173	0.285517	0.5443	0.00686076	0.448359
1	15599021	FHAD1	0.0537931	0.100751	0.560181	0.0118263	0.717734
3	157154839	PTX3	0.0538393	0.02029	NA	NA	0.4693
7	45104101	CCM2	0.053844	NA	NA	0.053844	NA
7	108205125	THAP5	0.05388	NA	NA	0.05388	NA
14	55168914	SAMD4A	0.0539161	0.344218	0.229566	0.0480304	0.126658
20	10386134	MKKS	0.053925	0.360771	0.198003	0.290128	0.023201
19	1231179	CBARP	0.0539328	0.296733	0.0237372	0.286111	0.238652
2	125204348	CNTNAP5	0.0540295	0.420098	0.0028885	0.831158	0.478146
20	49575780	MOCS3	0.0540827	0.2257	0.135317	0.0672431	NA
7	110526714	IMMP2L	0.0541875	NA	NA	0.0541875	NA
1	160970508	F11R	0.0542436	0.04107	0.138287	0.0960597	0.889226
3	98001858	OR5H2	0.0542835	0.0758449	0.146013	0.118952	0.368685
7	86394593	GRM3	0.0542964	0.0141	0.6823	NA	NA
19	19757099	ATP13A1	0.0543299	0.494069	0.762296	0.370925	0.003481
15	102389224	OR4F13P	0.0543414	0.2006	NA	0.01593	0.6469
1	40980715	EXO5	0.0544484	0.0169604	NA	0.56916	NA
2	102625068	IL1R2	0.0544898	0.812095	0.357697	0.00273416	0.61501
2	27594142	SNX17	0.0545846	0.579102	0.6992	0.00687619	0.1759
1	150939281	CERS2	0.0545905	0.1932	0.1075	0.203489	0.1159
12	75692487	CAPS2	0.0546223	0.9135	0.5216	0.00186329	0.5522
5	178140242	ZNF354A	0.0546784	0.106775	0.857308	0.0227756	NA
17	47075135	IGF2BP1	0.0547488	NA	NA	0.3235	0.03004
19	56459302	NLRP8	0.0547963	0.889443	0.893658	0.519959	0.00119193
17	19835191	AKAP10	0.05481	NA	NA	0.05481	NA
12	29598258	OVCH1	0.0548206	0.274447	0.639385	0.108573	0.0258737
6	170153986	ERMARD	0.0548577	0.0922023	0.74073	0.0172225	0.419515
1	231114915	ARV1	0.0548654	0.171757	0.882554	0.683154	0.0047661
11	120292542	ARHGEF12	0.0548796	0.113865	0.875375	0.436443	0.01135
10	75574840	CAMK2G	0.0549505	NA	0.7345	0.01329	NA
1	151748578	TDRKH	0.0549848	0.601101	0.0878735	0.013204	0.709992
1	6592718	NOL9	0.0550261	0.00786804	0.4051	0.262639	0.5922
8	102570816	GRHL2	0.0550788	0.3935	0.0811222	0.0754244	0.2062
19	35639614	FXYD7	0.05518	NA	NA	0.05518	NA
10	128780221	DOCK1	0.0552903	0.874918	0.112177	0.390412	0.0130319
5	149740732	TCOF1	0.0553707	0.202089	0.566369	0.0744298	0.0587444
3	25635127	RARB	0.0553758	NA	0.2847	0.03461	NA
11	71169480	NADSYN1	0.0553878	0.0360736	0.482203	0.177536	0.162125
12	120741548	SIRT4	0.0555634	0.640825	0.114299	0.0139263	0.493193
10	134622046	CFAP46	0.0555867	0.450768	0.404207	0.00745303	0.3707
4	39217621	WDR19	0.0556543	0.0208806	0.393266	0.240138	0.255753
1	214531313	PTPN14	0.0556613	0.078235	0.615192	0.0145797	0.718841
7	2692634	TTYH3	0.0556801	0.218095	0.6733	0.0145574	NA
2	97427292	CNNM4	0.05572	0.01289	0.2381	0.697194	NA
17	46703373	HOXB9	0.0557997	0.354148	NA	0.0202287	0.299274
8	21929939	DMTN	0.0559977	0.01468	NA	0.6804	NA
5	54275218	ESM1	0.0560337	0.224178	NA	0.04459	NA
5	176734657	MXD3	0.0562671	0.07259	NA	0.0447	0.668394
18	61390365	SERPINB11	0.0563392	0.5607	0.0345282	0.625277	0.04244
4	103518700	NFKB1	0.0564612	0.93712	0.1447	0.49623	0.00766
3	101293089	PCNP	0.05648	NA	NA	0.05648	NA
6	41704655	PGC	0.0564924	0.888311	0.08793	0.00683548	0.9662
17	42272470	ATXN7L3	0.05661	NA	NA	0.05661	NA
14	39716424	MIA2	0.0567065	0.831557	0.0734298	0.0210344	0.403954
4	120166520	USP53	0.0567237	0.0813235	0.471711	0.0390752	0.346285
12	48181902	HDAC7	0.056746	0.0954351	0.127002	0.0665814	0.643597
1	110050180	AMIGO1	0.0568922	0.1652	0.14797	0.735292	0.0290091
21	47717537	YBEY	0.0569178	NA	0.05447	0.9743	0.04152
11	3249681	MRGPRE	0.0569336	0.835483	0.191317	0.669598	0.004877
11	108264068	C11orf65	0.057016	0.00774134	0.43526	0.327974	0.473377
7	103767338	ORC5	0.057044	0.732086	0.09868	0.0191207	0.379
10	104638196	AS3MT	0.0571629	0.2537	0.272374	0.253282	0.0300065
8	19681436	INTS10	0.0572635	0.453888	0.445	0.07483	0.03484
12	131466490	ADGRD1	0.0573179	0.69204	0.973849	0.0110887	0.0705641
17	58125641	HEATR6	0.0573375	0.264188	0.3379	0.0249351	NA
4	69342021	TMPRSS11E	0.0573387	NA	NA	0.7291	0.0141
5	147024446	JAKMIP2	0.0573411	0.5858	0.37092	0.416617	0.00582891
1	26161769	AUNIP	0.0573861	0.0421276	0.1294	0.408808	NA
6	70386413	LMBRD1	0.0574135	0.161389	0.8418	0.0164144	NA
19	11685989	ACP5	0.0574442	0.18404	NA	0.0559843	NA
12	109719428	FOXN4	0.0575748	0.27116	0.008543	0.518873	0.44171
12	46240639	ARID2	0.0575864	0.108727	0.266783	0.0375763	0.487257
19	9204042	OR1M1	0.0576022	0.842092	0.301492	0.00447547	0.4676
16	88493940	ZNF469	0.0576904	0.72917	0.278044	0.02115	0.124195
6	29079755	OR2J3	0.0578908	0.0111616	NA	0.9628	0.2099
5	133640228	CDKL3	0.057918	0.410361	0.120062	0.0196573	0.553169
7	16640454	ANKMY2	0.057919	0.9862	0.0180282	0.859197	0.0350715
1	160121836	ATP1A4	0.0579434	0.0966665	0.584303	0.0297331	0.319218
9	21970928	CDKN2A	0.0579519	0.241161	0.07993	0.128905	0.2158
19	15197916	OR1I1	0.0579577	NA	0.3791	0.00965425	0.6173
11	45946095	LARGE2	0.057961	0.448302	0.118379	0.0275723	0.36654
1	32713033	FAM167B	0.0580365	0.002027	0.9536	0.601	0.4626
9	71002414	PGM5	0.0581939	0.8374	NA	0.0125	NA
17	7454275	TNFSF12;TNFSF12-TNFSF13	0.058237	0.01854	NA	0.5651	NA
12	11339357	TAS2R42	0.0582725	NA	0.9165	0.01144	NA
11	58979126	MPEG1	0.0583389	0.950763	0.416789	0.0796886	0.0171531
6	47202564	TNFRSF21	0.0583405	0.0673237	0.13553	0.0669883	0.886226
19	19115337	SUGP2	0.0584111	0.737335	0.0101937	0.303842	NA
17	72436313	GPRC5C	0.0584987	0.500061	0.961718	0.40782	0.00277327
1	241663765	FH	0.0585	0.0585	NA	NA	NA
16	15692836	MARF1	0.0585353	0.152007	0.284353	0.109554	0.114973
15	82564060	SAXO2	0.0585395	NA	0.2111	0.0499449	NA
6	86282026	SNX14	0.0588076	0.2972	0.3273	0.0236983	NA
16	31765105	ZNF720	0.05896	NA	NA	0.05896	NA
1	32145693	COL16A1	0.0590782	0.856138	0.0432301	0.0211726	0.704587
19	14991887	OR7A17	0.0591306	NA	0.0902	0.485871	0.053
12	58144446	CDK4	0.05921	0.05921	NA	NA	NA
2	74803605	M1AP	0.0592347	0.10943	0.7099	0.0122379	0.5831
1	6685308	THAP3	0.0594193	0.215161	0.63932	0.00816726	0.495776
1	48694594	SLC5A9	0.0594409	0.507644	0.541753	0.813232	0.00249177
7	29923604	WIPF3	0.0594453	0.0772776	0.2247	0.0858918	0.3737
15	67528353	AAGAB	0.0594817	0.169073	0.703	0.644554	0.00728193
4	4242132	TMEM128	0.059549	0.004292	0.9902	0.5519	NA
16	67697180	ENKD1	0.0595579	0.06547	0.2992	0.119764	NA
1	207133774	FCAMR	0.0595977	0.461872	0.779406	0.00212692	0.730783
12	108589662	WSCD2	0.0596463	0.0456274	0.7768	0.0208086	0.7596
1	111857201	CHIA	0.0597571	0.519359	0.529166	0.188408	0.01085
8	121209159	COL14A1	0.0598258	0.15791	0.373511	0.0927014	0.102932
15	41795054	ITPKA	0.0598377	0.66	0.04266	0.0367011	0.5448
12	133586836	ZNF26	0.0598457	0.01947	NA	0.5563	NA
12	5603600	NTF3	0.0599168	0.576985	0.1722	0.4408	0.01288
16	15761274	NDE1	0.06004	NA	NA	0.06004	NA
17	79993919	DCXR	0.0601102	0.6849	0.001027	0.8232	0.979
1	153507176	S100A6	0.0602415	NA	0.381749	0.653691	0.009551
3	47447473	PTPN23	0.0603376	0.0710861	0.11251	0.693789	0.10275
17	18862551	SLC5A10	0.0603386	0.0603386	NA	NA	NA
9	138457640	PAEP	0.0603551	NA	0.6989	0.004587	0.7454
2	128471186	WDR33	0.0604107	0.0181016	0.734642	0.122653	0.3502
11	75298327	MAP6	0.0605012	0.00137769	0.922686	0.968999	0.46478
3	38167080	ACAA1	0.0606594	0.181789	0.371915	0.341835	0.02487
19	19822917	ZNF14	0.060678	0.0145233	NA	0.758466	NA
12	31106941	TSPAN11	0.0607724	0.8099	0.0110283	0.225963	0.2856
8	42587021	CHRNB3	0.0608517	0.0392169	0.9124	0.188125	0.0858015
3	190321920	IL1RAP	0.0609628	0.983008	0.923286	0.206517	0.00309
12	6935391	GPR162	0.0609756	0.02559	0.220716	0.42913	NA
13	21906194	MIPEPP3	0.06105	0.06105	NA	NA	NA
1	156670334	CRABP2	0.0610512	0.10278	0.0294611	0.581952	0.3294
19	58017782	ZNF773	0.0610953	0.6304	NA	0.0176207	NA
9	27172662	TEK	0.0611153	0.200887	0.2671	0.983232	0.01102
1	1361736	TMEM88B	0.0611712	0.2077	0.804	0.01023	0.3408
3	10089689	FANCD2	0.0611951	0.649236	0.184843	0.241265	0.02012
1	185267193	IVNS1ABP	0.0613028	0.043051	NA	0.259093	NA
19	44831984	ZNF112	0.0614114	0.8848	0.06115	0.0186829	0.5794
22	45075720	PRR5	0.0614932	NA	0.631131	0.00892361	0.435438
18	28923439	DSG1	0.0616427	0.479386	0.628828	0.0044835	0.435836
5	140530248	PCDHB6	0.061662	0.351512	0.17492	0.792645	0.0120922
12	22354651	ST8SIA1	0.0616753	NA	0.5203	0.619554	0.007639
13	53277791	CNMD	0.0617042	0.267143	0.04518	0.204156	NA
20	1143791	PSMF1	0.0617122	0.344579	0.475076	0.00843171	0.4275
4	72121012	SLC4A4	0.0619889	0.385206	0.796115	0.403146	0.00480551
8	39091545	ADAM32	0.062055	0.150113	0.480816	0.264566	0.0311635
1	166829517	TADA1	0.0621867	0.008709	0.9887	0.197817	0.3505
14	81952649	SEL1L	0.0621969	0.0325775	0.648329	0.173986	0.162505
2	1418210	TPO	0.0622916	0.59495	0.541827	0.00422765	0.4392
8	110587865	SYBU	0.062339	0.53268	0.005662	0.25979	0.7648
11	93469413	TAF1D	0.0626359	0.5149	NA	0.0185454	0.263473
17	5984001	WSCD1	0.0627774	0.0114213	0.453718	0.144391	0.809499
17	43308023	FMNL1	0.0628383	0.0978724	0.02073	0.5889	0.507693
2	39222324	SOS1	0.0628626	0.854897	0.1493	0.894959	0.00531352
5	143586755	KCTD16	0.062864	0.1438	0.0583895	0.130655	0.55329
1	155240602	CLK2	0.0629746	0.0207777	0.297806	0.365372	0.2692
1	50610767	ELAVL4	0.0630416	0.6918	NA	0.0166846	NA
6	106543549	PRDM1	0.0631722	0.114721	0.98273	0.654874	0.008283
14	21360059	RNASE3	0.0631742	0.519832	0.00186605	0.730459	0.8631
18	31538235	NOL4	0.06319	0.06319	NA	NA	NA
13	52707832	NEK3	0.0632623	0.592063	0.386943	0.368155	0.0072665
11	61108974	TKFC	0.063277	0.562408	0.598035	0.0102753	0.1774
12	108986017	TMEM119	0.0633575	0.601459	0.01301	0.326684	NA
7	44621720	TMED4	0.0635049	0.4937	NA	0.02359	NA
15	43653305	ZSCAN29	0.0635815	0.0543114	0.116017	0.199185	0.492093
11	123756132	TMEM225	0.0636447	0.318	0.00988835	0.425348	0.462466
19	10203363	ANGPTL6	0.0637681	0.368	0.164582	0.0425878	NA
6	110533410	CDC40	0.0637724	NA	NA	0.04274	0.2739
2	26587700	SELENOI	0.0638716	0.249014	NA	0.047101	NA
7	99704892	TAF6	0.0641134	NA	0.128546	0.101485	0.199214
19	651704	RNF126	0.0641304	0.568231	0.7492	0.6102	0.002409
21	44438248	PKNOX1	0.0641862	0.05897	NA	0.200095	NA
3	30819751	GADL1	0.0643024	0.5004	0.7127	0.00306104	0.5756
11	61015916	PGA5	0.0643316	0.0643316	NA	NA	NA
6	43155458	CUL9	0.064372	0.973226	0.124824	0.00861136	0.601657
11	62521139	ZBTB3	0.0644316	NA	0.1312	0.0256829	0.7766
17	74735034	MFSD11	0.064465	0.147728	0.1398	0.1268	NA
11	62558353	TMEM223	0.0645298	0.473548	0.897671	0.006169	NA
4	41621362	LIMCH1	0.0645422	0.256163	0.0661765	0.402256	0.0926763
7	149545025	ZNF862	0.0646015	0.304471	0.648077	0.776571	0.00412999
19	4550183	SEMA6B	0.0646685	0.627683	0.309757	0.1916	0.0170151
1	1688096	NADK	0.0647301	0.0412316	0.69	0.040493	0.551021
15	65756196	DPP8	0.0648387	0.833107	0.31	0.0102217	NA
6	24520719	ALDH5A1	0.0648461	0.4564	0.745231	0.13223	0.0141532
3	37034021	EPM2AIP1	0.0648895	NA	0.02333	0.2168	0.5225
2	238233427	COL6A3	0.0649034	0.00584386	0.983092	0.909889	0.121934
9	88162066	AGTPBP1	0.0649357	0.293222	0.5521	0.00489574	0.804833
14	20711005	OR11H4	0.0650007	0.416153	0.0795049	0.217866	0.0886276
7	102389833	FAM185A	0.065003	0.2544	NA	0.0124475	0.8366
8	42977980	POMK	0.0651751	0.03537	NA	0.339916	NA
19	49079224	SULT2B1	0.0652435	0.386635	0.241701	0.107373	0.0640346
12	6666496	NOP2	0.0653547	0.155894	0.491585	0.0233151	0.360543
15	38988924	C15orf53	0.0653634	0.336929	NA	0.03581	NA
1	20466711	PLA2G2F	0.0654134	0.0175	NA	0.6901	NA
3	113697048	CCDC191	0.065572	0.748613	0.842378	0.256089	0.00400941
12	121221518	SPPL3	0.0655963	0.304	0.01375	0.7502	0.2066
10	21074832	NEBL	0.0657275	0.0467226	0.390822	0.098054	0.362948
10	90673040	STAMBPL1	0.0658395	0.16779	0.01125	0.6559	0.526254
19	57174993	ZNF835	0.0658415	0.884216	0.5119	0.3607	0.003991
4	2941317	NOP14	0.0658862	0.618447	0.868157	0.00258162	0.470577
14	73137882	DPF3	0.0660423	0.4934	0.454199	0.0120859	NA
16	89651940	CPNE7	0.0660787	0.929697	0.0016191	0.755477	0.576147
19	42728658	ZNF526	0.0661147	0.06865	NA	0.178234	NA
5	35904662	CAPSL	0.0662241	NA	NA	0.0662241	NA
16	86580242	MTHFSD	0.0662277	0.1116	0.634773	0.0196671	0.4719
20	48124462	PTGIS	0.0662896	0.254132	0.0568418	0.18848	NA
11	66029645	KLC2	0.0663323	0.01141	0.451905	0.188829	0.6769
12	124156614	TCTN2	0.0664211	0.200063	0.348122	0.574028	0.0165191
1	67220450	TCTEX1D1	0.06647	NA	NA	0.06647	NA
10	293358	ZMYND11	0.0665311	NA	NA	0.03526	0.3497
1	166890616	ILDR2	0.0666146	NA	NA	0.0666146	NA
1	67559041	C1orf141	0.0666308	0.0489497	0.238567	0.633777	0.0896657
2	97527015	SEMA4C	0.0668043	0.446472	0.0073116	0.314222	0.649555
12	53900640	NPFF	0.0668327	0.1812	0.04618	0.3291	NA
2	38829682	HNRNPLL	0.0668336	0.6625	NA	0.0187159	NA
19	4199944	ANKRD24	0.0669661	0.352346	0.983931	0.00686244	0.281101
11	67218787	GPR152	0.0669667	0.94934	0.115307	0.558678	0.0109356
19	44981185	ZNF180	0.0669927	0.5244	0.9005	0.00585119	NA
1	70819679	ANKRD13C	0.0669927	0.376	0.14445	0.0843884	0.146
2	102988526	IL18R1	0.0670514	0.5334	0.8087	0.871231	0.001783
11	56949447	LRRC55	0.067186	0.0587	NA	0.2126	NA
6	130372517	L3MBTL3	0.0674191	NA	NA	0.0674191	NA
3	44935105	TGM4	0.0674339	0.0181607	0.550102	0.076913	0.879733
19	44116609	SRRM5	0.0675645	0.25308	0.623602	0.456355	0.00941352
18	72913453	ZADH2	0.0677562	0.0166266	0.2831	0.207997	0.695526
1	57397497	C8B	0.0677801	0.00362984	0.216689	0.892372	0.97069
4	113568636	LARP7	0.067822	0.1937	NA	0.0651775	NA
2	56420201	CCDC85A	0.06784	NA	NA	0.06784	NA
4	122728748	EXOSC9	0.06784	NA	NA	0.06784	NA
3	51968725	RRP9	0.0678931	0.507779	0.443569	0.00529161	0.573112
16	58576468	CNOT1	0.0679033	0.3691	0.471205	0.0161895	NA
14	101365390	MEG8	0.06792	0.06792	NA	NA	NA
10	95891995	PLCE1	0.0679291	0.333654	0.0355409	0.0975447	0.591003
5	56526778	GPBP1	0.0679558	NA	0.563479	0.0125185	0.3996
11	67376033	NDUFV1	0.0680833	0.9496	NA	0.457869	0.0065
1	26349417	EXTL1	0.0681124	0.906969	0.443838	0.0918133	0.0185737
17	55058558	SCPEP1	0.0681778	NA	NA	0.0681778	NA
4	123207867	KIAA1109	0.0682376	0.1771	0.357157	0.275716	0.039474
17	7531088	SAT2	0.06847	0.06847	NA	NA	NA
2	136872987	CXCR4	0.06867	NA	NA	0.06867	NA
9	95840259	SUSD3	0.0687563	0.998435	0.03771	0.434039	0.04262
3	127294637	TPRA1	0.0688186	0.2322	0.292249	0.0190817	0.538632
5	118176782	DTWD2	0.0688392	0.00236075	0.4607	0.642617	0.9984
4	91229455	CCSER1	0.0688518	0.76948	0.762814	0.0138334	0.0859616
10	128147738	C10orf90	0.0689212	0.121249	0.230833	0.97517	0.0256134
3	69073223	TMF1	0.0689673	0.124534	0.0295517	0.920207	0.20664
3	148583153	CPA3	0.068972	0.103931	0.317101	0.746658	0.0284415
19	51984673	CEACAM18	0.0692234	0.00616596	0.232033	0.963707	0.510456
19	44635495	ZNF225	0.069313	0.0217393	0.203293	0.43983	0.362801
5	140201798	PCDHA5	0.0694312	0.781564	0.333564	0.198841	0.01364
1	218475847	RRP15	0.0694507	0.07739	NA	0.167963	NA
19	7600847	PNPLA6	0.0694572	0.569547	0.00529334	0.687063	0.341552
11	104897616	CASP1	0.0694677	0.885614	0.401762	0.00409679	0.485465
11	72406046	ARAP1	0.0696524	0.0079037	0.755121	0.265037	0.449201
1	213032155	FLVCR1	0.0697079	0.522567	0.22152	0.00910074	0.6753
11	68673601	IGHMBP2	0.0697992	0.222644	0.00386604	0.882543	0.93841
7	106685640	PRKAR2B	0.0698	0.0698	NA	NA	NA
11	60708672	SLC15A3	0.0698266	0.0349845	0.919888	0.0909828	NA
20	60884413	LAMA5	0.0699701	0.684724	0.771863	0.0254173	0.0532674
5	63509839	RNF180	0.0702	0.6589	0.5484	0.00276899	0.7188
10	112262561	DUSP5	0.070236	0.9573	0.0542286	0.0387445	0.357853
5	167841589	WWC1	0.070242	0.340462	0.0775464	0.0925831	0.2945
10	124794031	ACADSB	0.0703607	0.2682	NA	0.049249	NA
6	90354789	MDN1	0.0704042	0.519191	0.631431	0.152175	0.014481
15	100269365	LYSMD4	0.0704201	0.003979	0.276823	0.963656	0.680847
13	50306528	KPNA3	0.0704275	NA	NA	0.01698	0.7788
1	210273357	SYT14	0.0704676	0.1358	0.0561	0.389289	NA
9	36217445	GNE	0.0704997	0.741487	0.1333	0.0300247	NA
19	8922721	ZNF558	0.0705578	0.928128	0.00302805	0.314075	0.82121
17	73996233	TEN1	0.07056	0.07056	NA	NA	NA
10	115350645	NRAP	0.0706061	0.268761	0.275143	0.539838	0.0181773
20	44637635	MMP9	0.0706809	0.150169	0.0951217	0.423771	0.120071
16	85711861	GINS2	0.07085	NA	NA	0.07085	NA
17	1373742	MYO1C	0.07087	0.665457	0.539357	0.0191085	0.106414
22	31285229	LOC107985544	0.07098	0.07098	NA	NA	NA
19	17547702	TMEM221	0.07111	0.01693	0.2531	0.6403	0.2674
6	147635108	STXBP5	0.0711168	0.837936	0.0969078	0.0135169	0.668514
6	168708369	DACT2	0.0711423	0.0854289	0.490161	0.0311979	0.561992
8	23106860	CHMP7	0.0711763	0.08345	NA	0.160544	NA
15	69652439	PAQR5	0.0714203	0.2301	0.4636	0.0334495	0.207
5	35954509	UGT3A1	0.0715063	0.00378483	0.3205	0.773663	0.7885
6	151865822	CCDC170	0.0715419	0.320768	0.578701	0.986698	0.00404327
7	150164111	GIMAP8	0.0715788	0.607372	0.160287	0.0239628	0.3177
22	43926715	EFCAB6	0.0716379	0.259561	0.336913	0.321089	0.026429
2	27324554	CGREF1	0.071664	0.297338	0.0366943	0.069499	0.979224
19	57132750	ZNF71	0.0716815	0.303441	NA	0.044538	NA
9	115216344	C9orf147;HSDL2	0.0716941	NA	0.8262	0.2335	0.01575
1	109441560	GPSM2	0.0717361	0.978712	0.4996	0.00217362	0.699718
5	133534797	PPP2CA	0.07178	NA	NA	0.07178	NA
16	55844871	CES1	0.0718035	0.0524485	0.03518	0.669707	0.602702
17	76695024	CYTH1	0.07181	NA	NA	0.07181	NA
1	207641950	CR2	0.0718111	0.0494626	0.380695	0.387444	0.1021
11	75134906	KLHL35	0.0718701	0.8701	0.0507605	0.0946035	0.1785
2	192922499	TMEFF2	0.0718898	NA	0.1109	0.1223	NA
12	89743140	DUSP6	0.0718899	NA	0.014	0.968794	NA
6	31711970	MSH5	0.0720524	0.01035	0.648603	0.196578	0.5674
10	106074693	ITPRIP	0.0721791	0.01018	0.231898	0.708172	0.4491
13	96234511	DZIP1	0.07235	0.029964	0.5041	0.865668	0.05763
3	55922561	ERC2	0.0724606	0.0721618	0.04627	0.581401	0.3891
1	28240648	RPA2	0.0725234	0.007914	0.271707	0.55709	0.6314
2	233641183	GIGYF2	0.0726191	0.496684	0.628537	0.0129048	0.188128
7	148873662	ZNF398	0.0726691	0.657369	0.959412	0.00200765	0.599206
6	36106712	MAPK13	0.0727193	0.632007	0.752194	0.00181069	0.882363
21	47556900	FTCD	0.0727654	0.170419	0.0181941	0.643793	0.380868
16	3367292	ZNF75A	0.0728	NA	NA	0.0728	NA
3	48493268	ATRIP	0.0728269	0.114166	0.439153	0.0254497	0.596625
1	2337954	PEX10	0.07293	0.07293	NA	NA	NA
17	12819243	ARHGAP44	0.07294	NA	NA	0.07294	NA
1	176833427	ASTN1	0.0730066	0.303874	0.255986	0.0314872	0.312
14	20295728	OR4N2	0.0730644	0.120132	NA	0.11518	NA
12	12975622	DDX47	0.0730963	0.03032	NA	0.456606	NA
5	36962301	NIPBL	0.0731867	0.4394	0.0140461	0.164081	0.7575
7	142749439	OR6V1	0.0732141	0.833087	0.865432	0.433011	0.0024586
3	50355730	HYAL2	0.07326	NA	0.07326	NA	NA
17	37093490	FBXO47	0.073291	0.7663	0.1082	0.036839	0.2517
5	151202370	GLRA1	0.07334	NA	NA	0.07334	NA
3	160119783	SMC4	0.0733678	NA	NA	0.0733678	NA
9	33922711	UBAP2	0.0735094	0.276728	0.131954	0.0861877	NA
7	115582091	TFEC	0.0735107	NA	NA	0.0735107	NA
16	30365112	CD2BP2	0.0735447	NA	0.01333	0.281986	0.837832
3	38591847	SCN5A	0.0735801	0.778706	0.0682275	0.0158566	0.91818
7	36910058	ELMO1	0.0736003	0.0330981	0.103742	0.918167	NA
10	27009268	PDSS1	0.073615	0.007349	0.1748	0.701989	0.8584
3	48677191	CELSR3	0.0737559	0.965231	0.43554	0.0052698	0.35045
19	55685931	SYT5	0.0738008	NA	NA	0.332996	0.04207
10	102566298	PAX2	0.07385	NA	NA	0.07385	NA
5	138714971	SLC23A1	0.0739682	NA	0.0205272	0.68438	NA
10	5005651	AKR1C1	0.074058	0.638649	NA	0.02203	NA
1	153733338	INTS3	0.0740642	0.83422	0.06735	0.0566109	NA
1	157648533	FCRL3	0.0740736	0.512987	0.346635	0.00601056	0.731281
16	70515300	COG4	0.0741614	0.291278	0.712152	0.731196	0.00516253
4	106307725	PPA2	0.0742524	0.0375347	NA	0.376054	NA
14	39649827	PNN	0.0742809	0.349312	0.495	0.614492	0.007388
16	14738258	BFAR	0.0743076	NA	NA	0.0743076	NA
14	24566139	PCK2	0.0743952	0.331153	0.353894	0.0820634	0.081818
9	139927589	C9orf139	0.0744157	NA	NA	0.0744157	NA
17	37813262	STARD3	0.0745113	0.146935	0.406568	0.0195609	0.675
7	20180673	MACC1	0.0748084	0.702853	0.0112024	0.709142	0.142144
20	49508508	ADNP	0.0748608	0.0275	0.489881	0.132982	0.4435
3	12845013	CAND2	0.0749508	0.0773739	0.0914915	0.826021	0.13613
11	8435100	STK33	0.0749759	0.0197788	0.435218	0.387605	0.2387
11	57480270	TMX2	0.0750236	0.03969	NA	0.3602	NA
8	27685635	PBK	0.0750606	NA	NA	0.0750606	NA
20	34146742	FER1L4	0.075195	0.075195	NA	NA	NA
15	44066904	ELL3	0.0752246	0.8824	0.052804	0.0437402	0.3928
16	47162475	NETO2	0.075231	NA	0.0603413	0.237734	NA
20	34241281	RBM12	0.0755277	0.6777	0.005848	0.370375	0.5488
17	42475670	GPATCH8	0.075627	0.721621	0.697807	0.00441366	0.3632
11	64571966	MEN1	0.0757551	0.356813	NA	0.04055	NA
21	42694921	FAM3B	0.0757627	NA	NA	0.0757627	NA
5	141694021	SPRY4	0.0757829	0.182111	0.281579	0.178171	0.0886355
4	4303815	ZBTB49	0.0758809	0.756107	0.239193	0.173953	0.0257923
11	60531262	MS4A15	0.0759094	0.0760632	0.756088	0.976672	0.0144548
5	177577923	NHP2	0.0759758	NA	0.06702	0.246341	0.1997
3	149192678	TM4SF4	0.0760753	NA	NA	0.0760753	NA
22	32587061	RFPL2	0.076119	0.2896	NA	0.01273	0.8967
3	170078827	SKIL	0.0762471	0.00441977	0.5241	0.783257	0.4506
7	28843947	CREB5	0.0762574	NA	0.03334	0.120539	0.8247
1	86822246	ODF2L	0.0763402	0.2641	0.584954	0.0137077	0.386794
1	173155860	TNFSF4	0.0765184	NA	0.07181	0.204	NA
7	142481234	PRSS3P2	0.0766049	0.3063	NA	0.1767	0.06163
13	52439731	CCDC70	0.0766071	0.6796	0.308525	0.0118237	0.3322
8	87497181	RMDN1	0.07663	NA	NA	0.07663	NA
12	13364484	EMP1	0.0767464	0.08206	0.2745	0.791088	0.0463476
7	121944239	FEZF1	0.0767875	0.9046	0.3351	0.004268	0.6389
5	24509749	CDH10	0.0769273	0.0575754	NA	0.256119	NA
5	73932199	ENC1	0.0769303	NA	0.9103	0.0162	NA
17	40274891	HSPB9	0.0770006	NA	0.8699	0.0361995	0.1067
16	71512175	ZNF19	0.0770566	0.02519	NA	0.586614	NA
21	43221483	PRDM15	0.0770637	0.635927	0.025673	0.15707	0.324147
19	6901961	ADGRE1	0.0770799	0.660609	0.0954738	0.0201665	0.653738
11	112050079	BCO2	0.0770887	0.682193	0.277064	0.449323	0.00979246
17	26691310	SEBOX	0.0771372	NA	NA	0.0771372	NA
11	82877066	PCF11	0.0771717	0.869497	0.803351	0.564393	0.00211306
4	5577974	EVC2	0.0772215	0.196175	0.061946	0.506447	0.135492
14	21489992	NDRG2	0.0772289	0.3076	0.05317	0.149542	0.341
21	33949136	C21orf59-TCP10L;TCP10L	0.07723	NA	NA	0.07723	NA
16	4847824	ROGDI	0.0772941	0.02743	0.05978	0.914331	0.557
19	10335511	S1PR2	0.0773298	0.4843	NA	0.0219489	0.318
15	80263107	BCL2A1	0.0773388	NA	NA	0.0773388	NA
6	89790656	PNRC1	0.0775114	0.2929	0.1014	0.7691	0.03672
19	42792080	CIC	0.0776179	0.4366	NA	0.0341505	NA
6	32154416	PBX2	0.0778176	0.0460377	NA	0.3249	NA
1	67635211	IL23R	0.0778191	0.522296	0.377709	0.0106305	0.402438
22	42221714	CCDC134	0.0778363	NA	NA	0.0778363	NA
12	53699765	C12orf10	0.077875	0.5344	0.94563	0.973462	0.00171754
17	56283734	MKS1	0.0779254	0.57252	0.196029	0.300359	0.0250901
11	89088185	NOX4	0.0782095	0.324513	0.911647	0.095835	0.030001
10	43977929	ZNF487	0.07826	0.07826	NA	NA	NA
7	77423450	TMEM60	0.0784232	NA	0.02269	0.4233	0.359
13	99848809	UBAC2-AS1	0.07854	0.07854	NA	NA	NA
12	122277891	HPD	0.0786819	0.573663	0.623387	0.0037605	0.638475
3	46712512	ALS2CL	0.0786859	0.690189	0.0477306	0.0378137	0.689327
4	151186882	LRBA	0.0788047	0.0502758	0.551953	0.0371987	0.833823
1	20827826	MUL1	0.0788706	0.1245	0.7618	0.1024	0.08874
12	7842749	GDF3	0.0789043	0.965477	0.116714	0.0159875	0.47871
2	11284184	C2orf50	0.0789162	0.8239	0.1763	0.02713	0.2189
16	3022997	PKMYT1	0.078942	NA	NA	0.078942	NA
4	62758596	ADGRL3	0.078986	0.493545	0.813899	0.525933	0.00408879
5	141304176	KIAA0141	0.079007	0.01372	0.477	0.142908	0.924
15	30927362	ARHGAP11B	0.0790507	NA	0.2053	0.07429	NA
21	37408510	SETD4	0.0791943	0.705821	0.366143	0.0212944	0.157616
20	1902205	SIRPA	0.0792435	NA	0.6792	0.0258765	0.1991
11	77383137	RSF1	0.0793074	0.814306	0.450485	0.00358492	0.661045
16	30774829	RNF40	0.079378	0.8691	0.669916	0.00211811	0.7059
2	209106854	IDH1	0.0793938	NA	NA	0.0793938	NA
1	86894231	CLCA2	0.079473	0.19516	0.0581738	0.830528	0.0924961
8	72963058	TRPA1	0.0794734	0.631895	0.222819	0.00778761	0.795421
5	139661097	PFDN1	0.079546	NA	0.01179	0.3294	0.9059
15	43927582	CATSPER2	0.0795625	0.0446429	0.0761827	0.256893	1
10	127438014	EDRF1	0.0797583	0.3069	NA	0.01349	0.853
6	64430897	EYS	0.0797728	0.325982	0.60692	0.864517	0.00512926
14	68024020	PLEKHH1	0.0797917	0.845079	0.480768	0.397382	0.00543593
3	190030679	CLDN1	0.0798451	0.1281	NA	0.120546	NA
10	103588870	KCNIP2	0.0801158	0.1029	0.5438	0.0635121	NA
7	99526464	GJC3	0.080125	NA	0.2316	0.0669649	NA
14	63417122	KCNH5	0.0802561	0.450889	NA	0.0344664	NA
11	27371856	CCDC34	0.0803092	0.001628	0.62498	0.992893	0.877577
3	123665767	CCDC14	0.0803129	0.4061	NA	0.115666	0.0759248
9	130472880	CFAP157	0.0804969	0.461274	0.2058	0.549431	0.01706
6	31777877	HSPA1L	0.0806433	0.729579	0.4165	0.160033	0.01835
11	65347905	EHBP1L1	0.0806708	0.0252152	0.835959	0.1222	0.346612
19	45494509	CLPTM1	0.0808504	NA	0.1982	0.0791292	NA
3	183753872	HTR3D	0.080869	NA	0.332654	0.882028	0.0122743
20	825579	FAM110A	0.0811287	0.76347	0.01517	0.327633	0.237384
3	53220309	PRKCD	0.0811599	0.0832039	0.1942	0.214029	0.260623
1	42870265	RIMKLA	0.08125	NA	NA	0.08125	NA
10	51027411	PARG	0.08126	NA	NA	0.08126	NA
17	80884315	TBCD	0.0812701	0.481957	0.2977	0.0249209	0.252609
2	48808107	STON1;STON1-GTF2A1L	0.0813737	0.516953	0.0526112	0.0911708	0.364991
19	52877677	ZNF880	0.0814634	NA	NA	0.0814634	NA
18	43573589	PSTPIP2	0.0814804	0.641621	NA	0.02468	NA
11	123908879	OR10G7	0.0816627	0.185589	NA	0.0855611	NA
16	19514806	GDE1	0.0817362	0.725467	0.2747	0.00701638	0.651787
2	71012633	FIGLA	0.081773	NA	NA	0.081773	NA
2	210887737	KANSL1L	0.0818717	0.0295532	0.140685	0.473915	0.463736
1	158532447	OR6P1	0.0819869	0.145293	0.0348683	0.259242	0.697272
19	36365736	APLP1	0.0820703	0.4712	0.9721	0.00646364	0.3098
1	32193185	ADGRB2	0.0822255	0.0419628	0.348808	0.25384	0.2476
3	20017598	RAB5A	0.08226	NA	NA	0.08226	NA
10	116719537	TRUB1	0.0822876	NA	NA	0.0822876	NA
12	53497380	SOAT2	0.0823186	0.0127073	0.352008	0.601699	0.342411
19	57705243	ZNF264	0.0823625	0.0235017	0.2351	0.668968	NA
5	134343766	CATSPER3	0.0823637	0.634307	0.0202766	0.0720429	0.995453
12	103988220	STAB2	0.0823841	0.09983	0.116341	0.079768	0.995983
16	24950845	ARHGAP17	0.0824054	0.522	0.1159	0.0157901	0.9663
10	85901354	GHITM	0.08242	NA	NA	0.08242	NA
17	3195207	OR3A1	0.0825382	0.528422	0.144477	0.0136054	0.89096
5	177546780	N4BP3	0.0825476	0.2602	0.491911	0.05737	0.126052
3	45030641	EXOSC7	0.08265	NA	NA	0.08265	NA
3	41288466	ULK4	0.0826948	0.810968	0.738427	0.00338987	0.457243
2	220096678	ANKZF1	0.0827399	0.600233	0.47505	0.0466405	0.0698541
6	112453955	LAMA4	0.0828399	0.0117942	0.807573	0.177561	0.550353
19	16611613	C19orf44	0.0829581	0.872401	0.0091893	0.465807	NA
1	161126779	UFC1	0.0829793	0.05405	NA	0.299681	NA
17	27233221	PHF12	0.0829814	NA	NA	0.0829814	NA
1	33799858	PHC2	0.0830359	0.107672	0.9583	0.111257	0.08138
7	27872466	JAZF1	0.083066	0.442	0.06804	0.1244	NA
2	9533695	ASAP2	0.083077	0.141906	0.928916	0.252877	0.0280481
4	71697257	GRSF1	0.0830999	0.7849	NA	0.020674	NA
12	69083373	NUP107	0.0831228	0.886897	0.969364	0.267421	0.00407012
3	194790454	XXYLT1	0.0831684	0.5372	0.844216	0.888885	0.00232329
17	1651988	SERPINF2	0.0833445	0.4988	0.332613	0.0226573	NA
11	128709120	KCNJ1	0.0834538	0.756978	0.00674226	0.737897	NA
6	142630763	ADGRG6	0.0834982	0.234753	0.515538	0.16384	0.0475279
19	2073407	MOB3A	0.0835603	0.002783	0.634201	0.87574	0.610424
3	46935398	PTH1R	0.0835655	0.0622591	0.365788	0.917901	0.04514
7	149473472	SSPO	0.0835715	0.944864	0.526261	0.421045	0.00450754
6	41162204	TREML2	0.0835897	0.965092	0.938432	0.00158377	0.658145
7	131189142	PODXL	0.0837618	0.755357	0.235652	0.015177	0.350575
2	233990575	INPP5D	0.0840165	0.392474	0.66951	0.00444365	0.815
2	97507907	ANKRD23	0.0840623	0.02051	0.1398	0.498984	0.6657
22	25124151	PIWIL3	0.0840647	0.412801	0.402136	0.127758	0.0449114
4	108816771	SGMS2	0.0843	NA	NA	0.0843	NA
12	111078278	TCTN1	0.0844713	0.131824	0.260785	0.683921	0.04082
1	149876686	SV2A	0.0844941	NA	NA	0.0844941	NA
17	5329392	RPAIN	0.0846169	NA	0.1365	0.121583	NA
3	140675500	SLC25A36	0.084639	NA	NA	0.084639	NA
19	38056190	ZNF571	0.0847109	0.6983	0.453633	0.0413606	0.0735796
1	226173167	SDE2	0.0848336	0.606427	0.013861	0.195452	0.588125
3	113786881	QTRT2	0.0848365	0.06573	NA	0.253305	NA
6	30039034	RNF39	0.084877	0.816071	0.03641	0.7485	0.04348
[truncated: 13,797 more rows]

## Sheet: STable18
Supplementary Table 18: Genome-wide significant p-values in EACC cohort for EMMAX-VT
Chr	Gene	Meta-pvalue	EACC	EPICNorfolk	BDES	IECC	REHS
1	S100PBP	3.098e-05	1e-07	0.3	0.56	0.74	0.35
1	ACTN2	5.42736e-05	1e-07	1	0.88	0.12	0.83
3	P4HTM	1.64538e-05	1e-07	0.51	0.29	0.24	0.56
3	ALG3	9.41157e-05	1e-07	0.63	0.64	0.5	0.87
4	ZNF141	0.000248418	1e-07	0.87	1	0.86	0.81
6	TTK	2.76627e-05	1e-07	0.78	0.43	0.23	0.49
9	OR13C5	1.79044e-05	1e-07	0.22	NA	0.77	0.92
9	IFT74	6.56912e-06	1e-07	NA	0.7	0.22	0.31
9	TMEM246	7.38397e-07	1e-07	NA	NA	0.41	NA
11	ESAM	5.15019e-05	1e-07	0.87	0.88	0.67	0.16
16	RAB11FIP3	3.93604e-07	1e-07	NA	0.12	0.0157	0.97
18	CEP192	5.64922e-07	1e-07	0.0057	0.45	0.47	0.28
19	SERTAD3	1e-07	1e-07	NA	NA	NA	NA
9	C9orf156	0.000249077	2e-07	0.86	0.61	0.63	0.92
17	CLEC10A	2.24759e-05	2e-07	0.27	0.32	0.19	0.89
12	HCAR1	3.90564e-07	3e-07	0.57	0.49	0.05	0.0052
14	ALDH6A1	0.000177261	3e-07	0.58	0.36	0.95	0.66
17	TTLL6	5.89825e-05	3e-07	0.54	0.52	0.77	0.15
9	FRMD3	0.000905166	6e-07	0.94	0.79	0.83	0.89
10	ZNF25	7e-07	7e-07	NA	NA	NA	NA
20	KIF3B	9.34926e-05	8e-07	NA	0.24	0.64	0.92
1	NDUFS2	7.51981e-05	1.1e-06	0.74	0.11	0.97	NA
19	C5AR1	0.00119454	1.5e-06	0.57	0.83	0.92	0.73
2	BCS1L	0.00254606	1.8e-06	0.95	0.92	0.88	0.96
1	GSTM5	0.000107266	1.9e-06	0.2	0.37	0.95	NA
9	ATP6V1G1	0.000396416	2.8e-06	NA	0.65	0.43	0.85
7	SLC13A1	0.000330399	3.9e-06	0.12	0.51	0.54	0.68
7	THSD7A	0.000607295	5.1e-06	0.39	0.14	0.84	0.83
11	WEE1	0.000254968	5.5e-06	0.83	NA	0.58	NA
9	GLT6D1	0.000477467	6.1e-06	0.31	0.8	0.24	0.39
3	CLDN18	0.000146734	6.5e-06	0.83	0.59	0.019	0.51

## Sheet: STable19
Supplementary Table 19: Genome-wide significant meta-analysis p-values using EACC cohorts for ACAT
Chr	Gene	Meta-pvalue	Asian	EPICNorfolk	BDES	IECC	REHS
1	MROH7	6.57e-06	7.43e-09	0.170463	0.760171	0.805423	0.832014
1	USH2A	1.25e-05	7.55e-09	0.984079	0.350626	0.671354	0.810868
17	TNFRSF13B	1.48e-05	4.76e-08	0.831024	0.879119	0.996873	0.0502673
11	QSER1	3.98e-06	8.82e-08	0.415731	0.616487	0.033613	0.461348
16	NLRC5	0.000117187	1.12e-07	0.3735	0.634299	0.993596	0.878577
2	TRPM8	4.66e-05	1.6e-07	0.2689	0.5207	0.420036	0.7697
6	GCNT2	3.44e-05	2.01e-07	0.413744	0.773234	0.0786442	0.980012
8	HAS2	2.61e-06	3.47e-07	NA	NA	0.4507	NA
2	TANK	6.02e-05	8.94e-07	0.225081	0.151669	0.847623	0.385902
1	GSTM5	5.48e-05	1.74e-06	0.2008	0.3123	0.543317	NA
6	CCDC170	1.44e-05	2.27e-06	0.320768	0.578701	0.986698	0.00404327
10	SYNPO2L	0.000332552	2.46e-06	0.811623	0.298523	0.67069	0.2211
9	FBXW5	0.000875362	2.53e-06	0.900446	0.186219	0.922516	0.804405
2	PARD3B	0.00186281	2.98e-06	0.776755	0.754084	0.847738	0.5864
10	VTI1A	0.000134982	5.65e-06	NA	0.4267	0.5242	NA
11	WEE1	0.000314036	5.8e-06	0.8576	NA	0.6792	NA
3	CPB1	0.000149779	5.99e-06	0.333229	0.138407	0.172112	0.665915
15	BUB1B	0.00182119	6.52e-06	0.980476	0.236774	0.750258	0.741016
1	SPOCD1	0.000264111	6.61e-06	0.5856	0.672606	0.0258706	0.973788
2	TRIP12	0.000547731	9.06e-06	0.474012	0.1113	0.488413	0.7261
3	SCN5A	4.6e-05	9.2e-06	0.778706	0.0682275	0.0158566	0.91818

## Sheet: STable20
Supplementary Table 20: Genome-wide significant p-values in EACC cohort for EMMAX-CMC
Chr	Gene	Meta-pvalue	EACC	EPICNorfolk	BDES	IECC	REHS
17	TTLL6	4.96601e-06	5.693e-08	0.1996	0.2663	0.2225	0.6819
11	WEE1	0.000313773	5.797e-06	0.8572	NA	0.6792	NA
19	ZNF564	1.18969e-06	6.462e-06	NA	0.03817	0.02421	NA
3	CLDN18	0.000365574	7.991e-06	0.519	0.5519	0.09088	0.4805
1	GSTM5	0.000304441	9.41e-06	0.2007	0.4611	0.5507	NA

## Sheet: STable21
Supplementary Table 21: Genes significant in one cohort and but no rare variants present in other cohorts for EMMAX-VT
Chr	Gene	P-value	Cohort	Test
19	SERTAD3	1e-07	EACC	EMMAX-VT
10	ZNF25	7e-07	EACC	EMMAX-VT
19	KLF1	2.4e-06	EPIC-Norfolk	EMMAX-VT
20	EDN3	2e-07	IECC	EMMAX-VT
18	CHMP1B	4.2e-06	IECC	EMMAX-VT
2	PRLH	1.15e-08	IECC	ACAT
19	KLF1	1.287e-06	EPIC-Norfolk	EMMAX-CMC

## Sheet: STable22
Supplementary Table 22: P-values of Replicated Genome-wide significant genes using UK BioBank
Chr	Gene	EMMAX-VT P-value in UKBB	EMMAX-CMC p-value in UKBB
3	P4HTM	0.016	0.00109235
6	CCDC170	0.016	0.00301797
3	CPB1	0.046	0.00390968
14	BBOF1	N/a	0.0188027
19	LILRA5	0.14	0.0332899
6	TTK	0.24	0.0402735
19	ZNF564	0.14	0.0494582
19	C5AR1	0.0017	0.784127
2	TMEM169	0.0079	0.0731379
1	MROH7	0.0089	0.616027
7	SLC13A1	0.0095	0.956906
4	WDFY3	0.012	0.0661311
2	STON1	0.023	0.438084

[truncated: 3 more sheets: STable23, STable24, STable25]
